# Supplementary material
Source: PubMed Central journal article supplement (PMC3053413)
Supplement: NIHMS254788-supplement-1.pdf [file NIHMS254788-supplement-1.pdf]

**Supplementary Materials Table 1.** Comparison of gene expression between AI and NT from the individual-experiment analyses of 7d embryos (d7E), 25 d embryos (d25E), 25 d extra-embryonic samples (d25X), and 280 d extra-embryonic samples (d280X) in first set of meta-analyses.

| Oligo ID    | cDNA          | Symbol    | d7E      |         | d25E     |         | d25X     |         | d280X    |         |
|-------------|---------------|-----------|----------|---------|----------|---------|----------|---------|----------|---------|
|             |               |           | Estimate | P-value | Estimate | P-value | Estimate | P-value | Estimate | P-value |
| OLIGO_00038 | BF042860      | RNF166    | -0.123   | 0.634   | 0.194    | 0.469   | -0.171   | 0.537   | -0.302   | 0.263   |
| OLIGO_00040 | BF045167      | POMT1     | 0.019    | 0.903   | 0.010    | 0.978   | 0.411    | 0.181   | -0.204   | 0.476   |
| OLIGO_00043 | BF043567      | ETFA      | 0.131    | 0.484   | -0.094   | 0.706   | -0.053   | 0.745   | -0.331   | 0.056   |
| OLIGO_00068 | BF042951      | GPX3      | 0.023    | 0.840   | -0.249   | 0.370   | -0.290   | 0.088   | 0.181    | 0.437   |
| OLIGO_00070 | AW464501      | HPRT1     | -0.079   | 0.785   | 0.055    | 0.837   | 0.224    | 0.259   | -0.220   | 0.097   |
| OLIGO_00074 | BF040652      | PLEKHC1   | 0.085    | 0.691   | -0.256   | 0.399   | 0.309    | 0.156   | 0.133    | 0.423   |
| OLIGO_00081 | AW463422      | PPIL1     | 0.109    | 0.600   | 0.142    | 0.686   | 0.379    | 0.061   | -0.609   | 0.003   |
| OLIGO_00086 | AW462335      | SULT1A1   | -0.027   | 0.870   | -0.083   | 0.845   | 0.123    | 0.675   | 0.520    | 0.121   |
| OLIGO_00087 | BF046074      | CCL15     | -0.306   | 0.132   | -0.585   | 0.038   | -0.771   | 0.038   | 0.844    | 0.020   |
| OLIGO_00161 | BM362588      | USMG5     | 0.047    | 0.836   | -0.136   | 0.628   | 0.547    | 0.043   | 0.279    | 0.064   |
| OLIGO_00166 | AW464473      | UFD1L     | 0.083    | 0.742   | 0.372    | 0.538   | 0.759    | 0.132   | 0.285    | 0.418   |
| OLIGO_00196 | BF039617      | BLOC1S2   | 0.011    | 0.972   | 0.153    | 0.699   | 0.424    | 0.187   | 0.030    | 0.931   |
| OLIGO_00209 | BF045356      | GRB2      | 0.226    | 0.156   | 0.685    | 0.007   | -0.008   | 0.961   | 0.212    | 0.177   |
| OLIGO_00220 | BP230002B20E6 | NFX1      | -0.161   | 0.294   | -0.133   | 0.583   | 0.055    | 0.746   | -0.211   | 0.290   |
| OLIGO_00228 | AW465641      | TBC1D12   | -0.248   | 0.236   | -0.013   | 0.975   | -0.223   | 0.496   | 0.044    | 0.821   |
| OLIGO_00261 | AW463949      | TATDN1    | 0.020    | 0.914   | -0.089   | 0.861   | -0.248   | 0.611   | -0.412   | 0.264   |
| OLIGO_00308 | AW464976      | SNAPC3    | 0.021    | 0.911   | -0.233   | 0.417   | -0.054   | 0.782   | 0.004    | 0.979   |
| OLIGO_00329 | BF045997      | PTP4A1    | 0.247    | 0.250   | 0.038    | 0.906   | -0.527   | 0.062   | 0.061    | 0.732   |
| OLIGO_00347 | BF039065      | 40430     | 0.046    | 0.826   | -0.336   | 0.401   | 0.105    | 0.697   | 0.181    | 0.439   |
| OLIGO_00357 | BF039874      | PTGFRN    | 0.104    | 0.677   | -0.132   | 0.741   | 0.535    | 0.070   | -0.242   | 0.225   |
| OLIGO_00369 | AW464544      | NDUFS6    | 0.439    | 0.024   | -0.496   | 0.061   | 0.080    | 0.630   | 0.162    | 0.390   |
| OLIGO_00383 | AW465461      | MME       | 0.066    | 0.823   | -0.351   | 0.228   | 0.889    | 0.168   | 0.629    | 0.045   |
| OLIGO_00395 | AW463755      | ATP6V0D1  | -0.066   | 0.744   | 0.341    | 0.229   | 0.651    | 0.048   | 0.045    | 0.815   |
| OLIGO_00423 | BM362140      | C17orf63  | -0.250   | 0.301   | -0.282   | 0.427   | 0.175    | 0.533   | -0.040   | 0.852   |
| OLIGO_00434 | AW461545      | SSBP2     | -0.087   | 0.811   | 0.077    | 0.771   | -0.071   | 0.842   | -0.074   | 0.777   |
| OLIGO_00444 | BF040479      | LDB1      | -0.060   | 0.626   | -0.125   | 0.626   | -0.063   | 0.651   | 0.317    | 0.039   |
| OLIGO_00498 | AW463124      | UBL4A     | 0.153    | 0.225   | -0.016   | 0.940   | -0.450   | 0.160   | -0.488   | 0.011   |
| OLIGO_00499 | AW461571      | PPAP2B    | 0.059    | 0.667   | -0.326   | 0.293   | 0.374    | 0.421   | -0.470   | 0.046   |
| OLIGO_00522 | BF044877      | USP19     | -0.110   | 0.604   | 0.042    | 0.849   | 0.039    | 0.844   | -0.131   | 0.461   |
| OLIGO_00541 | AW463287      | ANAPC2    | -0.011   | 0.941   | -0.169   | 0.542   | 0.043    | 0.863   | -0.392   | 0.052   |
| OLIGO_00565 | BF045990      | TMEM16F   | 0.316    | 0.150   | -0.344   | 0.185   | 0.202    | 0.410   | 0.008    | 0.976   |
| OLIGO_00586 | BF043255      | NRAS      | -0.068   | 0.802   | 0.244    | 0.391   | 0.120    | 0.522   | 0.040    | 0.842   |
| OLIGO_00610 | AW463985      | NOLA1     | 0.304    | 0.313   | -0.501   | 0.146   | 0.228    | 0.190   | -0.217   | 0.295   |
| OLIGO_00617 | BF044199      | C1orf43   | 0.211    | 0.147   | -0.067   | 0.837   | -0.055   | 0.866   | -0.088   | 0.600   |
| OLIGO_00626 | BF046725      | LOC493869 | -0.243   | 0.234   | -0.456   | 0.274   | -0.223   | 0.282   | 0.060    | 0.704   |
| OLIGO_00643 | BF042538      | AP3D1     | -0.033   | 0.911   | -0.123   | 0.748   | -0.227   | 0.510   | -0.561   | 0.031   |
| OLIGO_00648 | BF040688      | TSPAN7    | -0.575   | 0.208   | 0.394    | 0.272   | -1.206   | 0.144   | 0.210    | 0.291   |
| OLIGO_00652 | AW461462      | WDR5      | 0.415    | 0.012   | -0.634   | 0.029   | 0.614    | 0.047   | -0.291   | 0.345   |
| OLIGO_00677 | AW465250      | SDHC      | 0.194    | 0.409   | -0.232   | 0.520   | 0.196    | 0.603   | -0.150   | 0.599   |
| OLIGO_00720 | BF041407      | DHX29     | 0.137    | 0.485   | -0.056   | 0.849   | 0.178    | 0.237   | -0.281   | 0.018   |
| OLIGO_00726 | AW461927      | SMARCE1   | 0.144    | 0.334   | -0.462   | 0.202   | 0.150    | 0.621   | -0.515   | 0.036   |
| OLIGO_00767 | BM362752      | C20orf18  | 0.073    | 0.691   | -0.146   | 0.682   | -0.088   | 0.659   | 0.004    | 0.974   |
| OLIGO_00774 | BM363869      | KIAA1754L | 0.114    | 0.493   | -0.199   | 0.677   | -0.231   | 0.425   | -0.668   | 0.013   |
| OLIGO_00795 | BF044413      | COMMD7    | -0.074   | 0.588   | -0.311   | 0.518   | -0.483   | 0.313   | -0.579   | 0.050   |
| OLIGO_00833 | BF044900      | MAML1     | 0.028    | 0.846   | -0.010   | 0.969   | -0.556   | 0.014   | 0.136    | 0.394   |
| OLIGO_00839 | BF042401      | FLJ12118  | -0.225   | 0.184   | 0.039    | 0.950   | 0.540    | 0.380   | 0.262    | 0.439   |
| OLIGO_00886 | BM365991      | hCAP-H2   | -0.128   | 0.535   | 0.264    | 0.193   | 0.013    | 0.933   | -0.056   | 0.655   |
| OLIGO_00892 | BF040453      | SPTAN1    | 0.282    | 0.330   | 0.210    | 0.341   | -0.154   | 0.457   | 0.135    | 0.380   |
| OLIGO_00910 | AW463932      | ELOVL1    | -0.087   | 0.532   | -0.268   | 0.358   | 0.612    | 0.141   | -0.055   | 0.799   |
| OLIGO_00954 | AW461910      | SNX1      | 0.048    | 0.849   | 0.292    | 0.196   | 0.176    | 0.420   | -0.168   | 0.249   |

|             |                |           |        |       |        |       |        |       |        |       |
|-------------|----------------|-----------|--------|-------|--------|-------|--------|-------|--------|-------|
| OLIGO_00967 | BF042987       | IFT52     | -0.050 | 0.888 | 0.030  | 0.938 | -0.542 | 0.076 | -0.263 | 0.228 |
| OLIGO_01022 | BF045899       | CECR5     | -0.160 | 0.481 | -0.095 | 0.710 | -0.370 | 0.201 | -0.823 | 0.005 |
| OLIGO_01035 | BM361946       | NOSIP     | -0.079 | 0.713 | -0.344 | 0.241 | 0.245  | 0.368 | -0.074 | 0.738 |
| OLIGO_01041 | AW462323       | SIPA1L2   | 0.161  | 0.343 | -0.110 | 0.496 | -0.105 | 0.573 | 0.254  | 0.067 |
| OLIGO_01056 | BF044412       | MTCH2     | 0.207  | 0.206 | 0.279  | 0.485 | -0.272 | 0.167 | -0.265 | 0.249 |
| OLIGO_01077 | BF043470       | ACTR2     | 0.138  | 0.369 | 0.082  | 0.848 | -0.340 | 0.471 | -0.027 | 0.905 |
| OLIGO_01134 | AW466155       | RAC3      | -0.123 | 0.606 | -0.436 | 0.490 | 0.312  | 0.436 | 0.574  | 0.354 |
| OLIGO_01236 | BF043185       | ATF4      | 0.021  | 0.908 | -0.099 | 0.663 | -0.660 | 0.084 | -0.155 | 0.421 |
| OLIGO_01239 | BF045394       | UBAP1     | 0.080  | 0.603 | 0.110  | 0.449 | 0.152  | 0.311 | 0.082  | 0.631 |
| OLIGO_01256 | AW462157       | STARD5    | 0.170  | 0.413 | 0.731  | 0.013 | 0.003  | 0.979 | 0.495  | 0.045 |
| OLIGO_01257 | AW464069       | BMSC-MCP  | 0.240  | 0.233 | 0.644  | 0.023 | -0.033 | 0.860 | 0.238  | 0.156 |
| OLIGO_01258 | BM365199       | SMARCA2   | 0.096  | 0.665 | 1.120  | 0.041 | -0.061 | 0.743 | 0.223  | 0.199 |
| OLIGO_01271 | BF041822       | AKAP9     | -0.005 | 0.973 | 0.175  | 0.601 | -0.476 | 0.162 | -0.265 | 0.284 |
| OLIGO_01293 | AW463403       | 40244     | -0.120 | 0.452 | -0.043 | 0.906 | 0.257  | 0.404 | 0.180  | 0.298 |
| OLIGO_01297 | BF042875       | IGBP1     | -0.199 | 0.231 | -0.075 | 0.779 | -0.317 | 0.227 | -0.126 | 0.472 |
| OLIGO_01364 | BP230002B20E3  | SLC25A26  | 0.156  | 0.321 | 0.524  | 0.131 | 0.094  | 0.524 | 0.123  | 0.358 |
| OLIGO_01376 | BF044038       | PIP5K1A   | 0.053  | 0.720 | 0.104  | 0.625 | 0.130  | 0.568 | 0.140  | 0.400 |
| OLIGO_01400 | BF039578       | COPZ1     | 0.073  | 0.590 | -0.217 | 0.368 | 0.106  | 0.414 | -0.024 | 0.843 |
| OLIGO_01414 | BF044584       | SETMAR    | 0.026  | 0.855 | -0.272 | 0.217 | 0.163  | 0.470 | 0.059  | 0.727 |
| OLIGO_01426 | BM364843       | TPX2      | 0.017  | 0.892 | -0.247 | 0.540 | -0.125 | 0.658 | -0.529 | 0.014 |
| OLIGO_01428 | BF045189       | NOTCH1    | -0.287 | 0.435 | 0.106  | 0.513 | -0.067 | 0.549 | -0.231 | 0.143 |
| OLIGO_01438 | BF043904       | KIAA0101  | -0.138 | 0.681 | -0.044 | 0.869 | -0.521 | 0.228 | -0.945 | 0.002 |
| OLIGO_01464 | AW461558       | CTNNBIP1  | 0.248  | 0.066 | -0.005 | 0.981 | 0.567  | 0.146 | 0.106  | 0.612 |
| OLIGO_01475 | BF045874       | HEATR1    | -0.473 | 0.062 | 0.237  | 0.336 | 0.128  | 0.247 | -0.141 | 0.404 |
| OLIGO_01489 | AW466144       | KEAP1     | -0.183 | 0.431 | -0.012 | 0.947 | 0.029  | 0.889 | -0.077 | 0.529 |
| OLIGO_01490 | AW464867       | MYO9B     | 0.232  | 0.124 | -0.415 | 0.134 | -0.387 | 0.080 | 0.091  | 0.643 |
| OLIGO_01505 | BF039186       | GPRC5C    | 0.176  | 0.597 | -0.095 | 0.660 | 0.047  | 0.744 | -0.264 | 0.048 |
| OLIGO_01512 | AW464469       | ZNF462    | -0.252 | 0.083 | -0.145 | 0.739 | -0.359 | 0.064 | -1.279 | 0.000 |
| OLIGO_01583 | BF042605       | YIPF3     | 0.031  | 0.820 | -0.060 | 0.747 | -0.282 | 0.239 | -0.077 | 0.634 |
| OLIGO_01590 | AW464831       | TPR       | 0.444  | 0.008 | -0.831 | 0.021 | -0.134 | 0.539 | -0.211 | 0.389 |
| OLIGO_01593 | BF041521       | C17orf32  | 0.209  | 0.210 | -0.143 | 0.652 | -0.039 | 0.850 | -0.189 | 0.306 |
| OLIGO_01613 | AW462081       | EMP1      | -0.291 | 0.211 | -0.559 | 0.156 | 0.292  | 0.098 | 0.391  | 0.074 |
| OLIGO_01643 | BS320039000B12 | V1ra2     | -0.028 | 0.851 | 0.407  | 0.165 | 0.123  | 0.650 | 0.014  | 0.948 |
| OLIGO_01646 | AW464452       | PIGY      | 0.109  | 0.303 | -0.137 | 0.589 | -0.275 | 0.238 | 0.185  | 0.476 |
| OLIGO_01666 | BF046551       | RBM23     | -0.014 | 0.924 | -0.047 | 0.866 | 0.009  | 0.957 | 0.123  | 0.479 |
| OLIGO_01679 | AW462941       | GNAI3     | 0.128  | 0.578 | -0.248 | 0.473 | 0.215  | 0.221 | 0.182  | 0.331 |
| OLIGO_01699 | BF045301       | METAP2    | 0.066  | 0.819 | -0.475 | 0.282 | 0.338  | 0.237 | 0.069  | 0.799 |
| OLIGO_01710 | BF043001       | GPR126    | 0.710  | 0.028 | -0.471 | 0.033 | 0.216  | 0.365 | 0.229  | 0.281 |
| OLIGO_01750 | BF039895       | Fbxw17    | 0.273  | 0.231 | 0.270  | 0.512 | -0.424 | 0.175 | -0.225 | 0.458 |
| OLIGO_01751 | AW461980       | LOC649124 | 0.300  | 0.113 | 0.046  | 0.867 | 0.116  | 0.596 | -0.275 | 0.123 |
| OLIGO_01756 | BF043107       | MASA      | 0.096  | 0.622 | -0.449 | 0.327 | -0.701 | 0.103 | -0.492 | 0.022 |
| OLIGO_01808 | BF041933       | TRPM4     | 0.168  | 0.279 | 0.188  | 0.582 | -0.004 | 0.984 | 0.048  | 0.683 |
| OLIGO_01829 | AW466123       | PLCL2     | -0.200 | 0.441 | -0.195 | 0.562 | -0.174 | 0.516 | -0.112 | 0.616 |
| OLIGO_01901 | BM364481       | ARFRP1    | 0.471  | 0.029 | -0.017 | 0.973 | -0.894 | 0.080 | -0.156 | 0.575 |
| OLIGO_01908 | BF043508       | RALB      | 0.334  | 0.083 | -0.662 | 0.017 | 0.048  | 0.778 | 0.249  | 0.225 |
| OLIGO_01921 | AW463960       | COL12A1   | 0.138  | 0.719 | -0.235 | 0.758 | 0.699  | 0.455 | 0.719  | 0.049 |
| OLIGO_01976 | AW463060       | CAST      | -0.187 | 0.342 | -0.175 | 0.517 | 0.271  | 0.302 | 0.408  | 0.038 |
| OLIGO_02027 | AW466175       | USP47     | 0.007  | 0.959 | 0.164  | 0.512 | -0.323 | 0.110 | -0.350 | 0.164 |
| OLIGO_02043 | AW461360       | UBE4B     | -0.112 | 0.468 | -0.186 | 0.589 | 0.386  | 0.248 | -0.299 | 0.229 |
| OLIGO_02045 | BF046198       | SUCLA2    | 0.201  | 0.476 | -0.089 | 0.810 | -0.321 | 0.331 | -0.396 | 0.134 |
| OLIGO_02076 | BF044403       | RAI14     | 0.181  | 0.488 | -0.612 | 0.067 | 0.183  | 0.432 | 0.060  | 0.796 |
| OLIGO_02130 | BF046437       | MTDH      | 0.067  | 0.784 | 0.320  | 0.407 | -0.042 | 0.882 | 0.293  | 0.200 |
| OLIGO_02136 | BF044404       | CANX      | 0.159  | 0.499 | -0.153 | 0.640 | 0.234  | 0.426 | -0.010 | 0.966 |
| OLIGO_02149 | BM363031       | NCALD     | 0.283  | 0.050 | -0.142 | 0.646 | 0.095  | 0.762 | -0.271 | 0.224 |
| OLIGO_02156 | BF041186       | HK3       | -0.304 | 0.279 | 0.102  | 0.709 | -0.095 | 0.725 | -0.572 | 0.062 |
| OLIGO_02164 | AW462589       | SMARCA1   | -0.121 | 0.694 | -0.100 | 0.875 | 0.446  | 0.161 | 0.256  | 0.505 |
| OLIGO_02165 | BF046464       | TEX10     | 0.401  | 0.019 | -0.410 | 0.281 | 0.152  | 0.381 | 0.017  | 0.942 |
| OLIGO_02168 | BF042659       | MECR      | 0.030  | 0.876 | -0.171 | 0.572 | 0.182  | 0.551 | -0.264 | 0.372 |
| OLIGO_02185 | BF043095       | NFAT5     | 0.379  | 0.039 | -0.246 | 0.407 | 0.165  | 0.427 | -0.160 | 0.570 |
| OLIGO_02211 | BF046222       | AKAP8L    | -0.468 | 0.050 | 0.043  | 0.940 | 0.327  | 0.418 | 0.300  | 0.386 |

|             |          |           |        |       |        |       |        |       |        |       |
|-------------|----------|-----------|--------|-------|--------|-------|--------|-------|--------|-------|
| OLIGO_02261 | BF040970 | AGPAT2    | 0.119  | 0.434 | -0.132 | 0.586 | -0.251 | 0.245 | -0.163 | 0.436 |
| OLIGO_02283 | BF041459 | USP30     | -0.132 | 0.502 | 0.490  | 0.143 | 0.149  | 0.580 | -0.709 | 0.001 |
| OLIGO_02284 | AW462091 | BLMH      | 0.441  | 0.028 | -0.457 | 0.063 | 0.208  | 0.368 | -0.287 | 0.092 |
| OLIGO_02292 | AW463893 | PTDSR     | 0.044  | 0.839 | -0.142 | 0.526 | 0.485  | 0.193 | 0.259  | 0.207 |
| OLIGO_02310 | BM364753 | NR4A2     | -0.253 | 0.314 | 0.913  | 0.055 | -0.105 | 0.724 | 0.113  | 0.709 |
| OLIGO_02326 | BF040786 | LYPLA1    | 0.059  | 0.700 | -0.046 | 0.862 | -0.601 | 0.152 | -0.435 | 0.054 |
| OLIGO_02336 | BF045355 | IPO7      | -0.051 | 0.810 | 0.154  | 0.682 | 0.407  | 0.506 | 0.026  | 0.918 |
| OLIGO_02351 | BF045248 | C1orf52   | -0.072 | 0.685 | -0.270 | 0.219 | -0.187 | 0.171 | 0.161  | 0.244 |
| OLIGO_02455 | AW461602 | G6PD      | -0.532 | 0.004 | 0.061  | 0.798 | 0.205  | 0.351 | 0.166  | 0.228 |
| OLIGO_02482 | AW465592 | DNAJC17   | -0.032 | 0.879 | 0.115  | 0.852 | 0.452  | 0.411 | 0.066  | 0.840 |
| OLIGO_02513 | BF043146 | LOC196463 | -0.106 | 0.704 | 0.486  | 0.234 | 0.067  | 0.853 | 0.611  | 0.014 |
| OLIGO_02544 | BF042048 | McI1      | 0.232  | 0.412 | -0.259 | 0.391 | 0.163  | 0.511 | 0.328  | 0.155 |
| OLIGO_02548 | BF042462 | PAPSS1    | -0.065 | 0.779 | -0.241 | 0.392 | 0.101  | 0.572 | -0.317 | 0.040 |
| OLIGO_02563 | BF044738 | PSMC4     | -0.039 | 0.862 | -0.173 | 0.551 | -0.042 | 0.853 | -0.325 | 0.087 |
| OLIGO_02565 | BF045454 | SPG7      | -0.179 | 0.367 | -0.300 | 0.414 | -0.144 | 0.407 | -0.771 | 0.027 |
| OLIGO_02578 | BF045855 | LSM12     | 0.067  | 0.654 | 0.042  | 0.866 | 0.110  | 0.681 | -0.185 | 0.255 |
| OLIGO_02583 | BM365732 | SON       | -0.104 | 0.609 | 0.166  | 0.678 | 0.337  | 0.329 | 0.096  | 0.722 |
| OLIGO_02588 | BF042641 | FAM62A    | -0.116 | 0.636 | 0.149  | 0.556 | -0.040 | 0.875 | -0.441 | 0.017 |
| OLIGO_02600 | BF039312 | TFDP1     | -0.119 | 0.585 | 0.577  | 0.168 | 0.357  | 0.338 | -0.175 | 0.431 |
| OLIGO_02608 | BF040765 | ELL       | 0.065  | 0.802 | -0.021 | 0.962 | -0.442 | 0.295 | -0.417 | 0.072 |
| OLIGO_02609 | BF045898 | GCLM      | -0.139 | 0.439 | 0.481  | 0.358 | 0.079  | 0.743 | 0.151  | 0.505 |
| OLIGO_02617 | BF044423 | LOC134147 | 0.100  | 0.659 | -0.305 | 0.385 | 0.284  | 0.427 | -0.839 | 0.003 |
| OLIGO_02628 | BF043601 | RBM10     | -0.177 | 0.297 | -0.110 | 0.531 | 0.082  | 0.672 | -0.210 | 0.144 |
| OLIGO_02636 | BF046289 | Usp12     | -0.157 | 0.472 | 0.020  | 0.919 | 0.175  | 0.126 | -0.226 | 0.197 |
| OLIGO_02685 | BM366655 | CSK       | -0.138 | 0.578 | 0.100  | 0.754 | -0.116 | 0.654 | 0.261  | 0.318 |
| OLIGO_02695 | BF041896 | CPSF3     | 0.160  | 0.420 | -0.098 | 0.825 | -0.423 | 0.278 | -0.219 | 0.429 |
| OLIGO_02716 | BF040215 | TMEM62    | 0.244  | 0.428 | -0.292 | 0.489 | 0.523  | 0.275 | 0.131  | 0.564 |
| OLIGO_02718 | BF042414 | C7orf19   | -0.230 | 0.386 | 0.341  | 0.016 | 0.015  | 0.935 | -0.266 | 0.105 |
| OLIGO_02729 | AW463984 | HERPUD1   | -0.120 | 0.535 | 0.463  | 0.311 | -0.533 | 0.132 | 0.263  | 0.195 |
| OLIGO_02768 | AW461859 | UBE2R2    | 0.193  | 0.205 | 0.108  | 0.757 | -0.031 | 0.925 | 0.027  | 0.897 |
| OLIGO_02798 | AW464012 | MARCKSL1  | 0.129  | 0.770 | -0.339 | 0.435 | 0.096  | 0.635 | 0.009  | 0.955 |
| OLIGO_02804 | AW463331 | NOB1      | 0.120  | 0.336 | -0.198 | 0.454 | 0.379  | 0.177 | -0.405 | 0.058 |
| OLIGO_02838 | BF045577 | KATNA1    | 0.057  | 0.744 | -0.208 | 0.367 | 0.066  | 0.776 | -0.178 | 0.364 |
| OLIGO_02867 | BM362352 | PDGFRA    | 0.315  | 0.296 | -0.116 | 0.739 | -0.108 | 0.790 | 0.169  | 0.527 |
| OLIGO_02876 | AW465750 | YY1       | 0.068  | 0.609 | -0.010 | 0.972 | -0.099 | 0.638 | -0.364 | 0.040 |
| OLIGO_02884 | BF042964 | NAB2      | -0.310 | 0.062 | 0.185  | 0.736 | 0.858  | 0.207 | 0.825  | 0.104 |
| OLIGO_02906 | BF042583 | PRKCBP1   | -0.111 | 0.620 | -0.450 | 0.202 | 0.315  | 0.211 | -0.009 | 0.969 |
| OLIGO_02917 | BF046357 | BSDC1     | 0.072  | 0.807 | 0.066  | 0.848 | 0.348  | 0.292 | 0.239  | 0.378 |
| OLIGO_02972 | BF042189 | GLT25D1   | -0.239 | 0.087 | 0.026  | 0.903 | 0.004  | 0.982 | -0.134 | 0.479 |
| OLIGO_02983 | BF042723 | ZNF609    | -0.123 | 0.467 | 0.063  | 0.744 | -0.196 | 0.228 | -0.101 | 0.454 |
| OLIGO_03005 | BF046541 | RPP14     | -0.300 | 0.092 | -0.112 | 0.771 | -0.377 | 0.269 | -0.226 | 0.113 |
| OLIGO_03015 | BF040858 | DNAJC14   | -0.454 | 0.011 | 0.440  | 0.162 | 0.083  | 0.778 | -0.210 | 0.349 |
| OLIGO_03019 | BF039518 | VAPB      | -0.225 | 0.228 | 0.058  | 0.780 | -0.430 | 0.019 | -0.192 | 0.179 |
| OLIGO_03026 | BM362192 | ADCK5     | 0.130  | 0.492 | -0.390 | 0.034 | 0.013  | 0.936 | 0.075  | 0.631 |
| OLIGO_03065 | AW463372 | DHX8      | -0.063 | 0.763 | -0.171 | 0.712 | 0.120  | 0.772 | 0.580  | 0.103 |
| OLIGO_03077 | AW464570 | AMZ2      | -0.070 | 0.712 | 0.396  | 0.387 | 0.333  | 0.099 | 0.127  | 0.475 |
| OLIGO_03099 | BF045182 | BCL10     | -0.004 | 0.985 | 0.058  | 0.761 | 0.059  | 0.668 | 0.047  | 0.787 |
| OLIGO_03104 | AW465112 | AVPI1     | 0.065  | 0.592 | -0.180 | 0.678 | 0.543  | 0.332 | 0.091  | 0.685 |
| OLIGO_03138 | BM362255 | RASA3     | -0.303 | 0.344 | -0.098 | 0.737 | -0.528 | 0.164 | -0.712 | 0.019 |
| OLIGO_03159 | AW464423 | ASAHL     | 0.253  | 0.316 | 0.190  | 0.668 | 0.225  | 0.426 | 0.237  | 0.323 |
| OLIGO_03207 | BF045376 | PDLIM1    | 0.392  | 0.269 | -0.209 | 0.531 | 0.217  | 0.579 | -0.044 | 0.753 |
| OLIGO_03217 | BF044774 | GALNT11   | 0.413  | 0.051 | 0.091  | 0.653 | 0.518  | 0.031 | 0.113  | 0.452 |
| OLIGO_03251 | BF045103 | ARPP-19   | 0.117  | 0.490 | -0.005 | 0.988 | 0.014  | 0.945 | -0.130 | 0.485 |
| OLIGO_03255 | BF041201 | POLR1C    | 0.181  | 0.365 | 0.224  | 0.286 | -0.211 | 0.272 | 0.042  | 0.770 |
| OLIGO_03302 | AW463187 | RPIA      | 0.070  | 0.753 | 0.094  | 0.643 | 0.003  | 0.987 | 0.436  | 0.042 |
| OLIGO_03329 | BM366884 | CALM1     | -0.126 | 0.560 | 0.210  | 0.709 | -0.990 | 0.134 | -0.035 | 0.795 |
| OLIGO_03331 | BF043890 | YTHDC1    | 0.066  | 0.582 | 0.053  | 0.819 | -0.448 | 0.056 | -0.078 | 0.595 |
| OLIGO_03341 | BF044339 | GLS       | -0.063 | 0.803 | -0.027 | 0.899 | -0.077 | 0.569 | -0.526 | 0.026 |
| OLIGO_03362 | BF044337 | PPA1      | 0.160  | 0.339 | 0.561  | 0.265 | -0.541 | 0.319 | -0.169 | 0.434 |
| OLIGO_03363 | BF041031 | PYGB      | -0.194 | 0.498 | 0.515  | 0.152 | 0.021  | 0.846 | -0.278 | 0.068 |

|             |               |             |        |       |        |       |        |       |        |       |
|-------------|---------------|-------------|--------|-------|--------|-------|--------|-------|--------|-------|
| OLIGO_03406 | AW465832      | SERP1       | -0.188 | 0.534 | 0.089  | 0.820 | 0.549  | 0.220 | -0.109 | 0.633 |
| OLIGO_03462 | BF039666      | CDC42EP2    | 0.056  | 0.757 | -0.119 | 0.730 | 0.087  | 0.784 | -0.371 | 0.231 |
| OLIGO_03471 | BF045006      | ATG9B       | -0.597 | 0.027 | 0.112  | 0.818 | -0.210 | 0.363 | 0.200  | 0.476 |
| OLIGO_03481 | BF043956      | ACAS2L      | 0.032  | 0.870 | 0.115  | 0.832 | 0.813  | 0.049 | 0.567  | 0.080 |
| OLIGO_03497 | BF046602      | NOLC1       | 0.019  | 0.906 | -0.073 | 0.838 | 0.190  | 0.582 | -0.159 | 0.225 |
| OLIGO_03536 | BF043026      | SLC27A1     | -0.110 | 0.552 | 0.167  | 0.686 | 0.248  | 0.474 | -0.405 | 0.089 |
| OLIGO_03550 | BF041298      | MLLT7       | -0.182 | 0.455 | -0.015 | 0.966 | 0.392  | 0.370 | 0.152  | 0.513 |
| OLIGO_03563 | AW463077      | RBM9        | -0.154 | 0.677 | 0.176  | 0.571 | -0.150 | 0.576 | -0.917 | 0.039 |
| OLIGO_03594 | BF440603      | DNTTIP2     | -0.107 | 0.613 | -0.211 | 0.628 | -0.302 | 0.218 | -0.273 | 0.303 |
| OLIGO_03595 | BF440613      | LR8         | -0.362 | 0.247 | -0.396 | 0.320 | -0.003 | 0.992 | -0.672 | 0.023 |
| OLIGO_03596 | BF440622      | C5orf25     | 0.284  | 0.156 | -0.165 | 0.698 | 0.226  | 0.412 | -0.169 | 0.589 |
| OLIGO_03597 | BF440618      | SNTB1       | -0.426 | 0.004 | 0.293  | 0.235 | 0.034  | 0.818 | 0.383  | 0.162 |
| OLIGO_03598 | BF440619      | RB1CC1      | -0.335 | 0.191 | 0.068  | 0.830 | -0.362 | 0.180 | -0.406 | 0.047 |
| OLIGO_03599 | BF440621      | HFE         | 0.179  | 0.450 | -0.011 | 0.958 | -0.252 | 0.485 | 0.046  | 0.823 |
| OLIGO_03605 | BP22000607803 | NEDD4       | -0.032 | 0.871 | 0.146  | 0.563 | -0.107 | 0.574 | 0.116  | 0.552 |
| OLIGO_03606 | BP22000609503 | RCL1        | 0.003  | 0.986 | -0.099 | 0.529 | -0.234 | 0.267 | -0.286 | 0.181 |
| OLIGO_03607 | BP22000609703 | MRPS36      | -0.232 | 0.209 | -0.277 | 0.359 | -0.121 | 0.576 | -0.448 | 0.019 |
| OLIGO_03608 | BP22000611003 | CCNH        | 0.098  | 0.558 | -0.267 | 0.140 | -0.105 | 0.433 | 0.046  | 0.787 |
| OLIGO_03609 | BP22000611303 | EP400       | -0.119 | 0.357 | 0.066  | 0.668 | -0.218 | 0.136 | -0.179 | 0.083 |
| OLIGO_03613 | BP22000615303 | FBXL5       | -0.263 | 0.216 | -0.264 | 0.623 | 0.380  | 0.405 | -0.886 | 0.039 |
| OLIGO_03615 | BP22000618403 | HBEGF       | 0.168  | 0.539 | 0.156  | 0.704 | 0.215  | 0.673 | -0.732 | 0.005 |
| OLIGO_03617 | AW461333      | ADAM28      | 0.011  | 0.955 | -0.219 | 0.422 | 0.586  | 0.266 | 0.800  | 0.053 |
| OLIGO_03623 | AW461471      | JDP2        | 0.073  | 0.643 | 0.193  | 0.451 | -0.395 | 0.150 | -0.382 | 0.040 |
| OLIGO_03624 | AW461481      | FLJ20273    | 0.100  | 0.704 | 0.467  | 0.226 | 0.789  | 0.039 | 0.150  | 0.502 |
| OLIGO_03625 | AW461503      | TRAPPC4     | 0.325  | 0.027 | 0.076  | 0.787 | 0.108  | 0.697 | -0.017 | 0.932 |
| OLIGO_03627 | AW461516      | GPBAR1      | -0.140 | 0.742 | 0.008  | 0.981 | -0.238 | 0.358 | -0.477 | 0.135 |
| OLIGO_03628 | AW461549      | ANK3        | -0.224 | 0.468 | -0.361 | 0.082 | -0.032 | 0.875 | 0.109  | 0.608 |
| OLIGO_03630 | AW461617      | AQP11       | -0.294 | 0.352 | 0.028  | 0.928 | 0.870  | 0.069 | -0.374 | 0.256 |
| OLIGO_03631 | AW461651      | EXOC2       | -0.043 | 0.789 | -0.123 | 0.546 | -0.147 | 0.170 | -0.277 | 0.081 |
| OLIGO_03632 | AW461661      | OBSL1       | 0.446  | 0.154 | -0.387 | 0.212 | -0.243 | 0.282 | 0.039  | 0.821 |
| OLIGO_03633 | AW461686      | TSG101      | -0.019 | 0.951 | -0.062 | 0.721 | -0.138 | 0.517 | -0.230 | 0.439 |
| OLIGO_03634 | AW461699      | ABCC10      | -0.005 | 0.981 | -0.275 | 0.351 | 0.182  | 0.378 | 0.141  | 0.442 |
| OLIGO_03635 | AW461717      | CKMT1B      | -0.023 | 0.891 | 0.103  | 0.613 | 0.281  | 0.380 | -0.264 | 0.184 |
| OLIGO_03639 | AW466074      | CFL1        | -0.100 | 0.602 | -0.360 | 0.466 | 0.382  | 0.414 | 0.243  | 0.424 |
| OLIGO_03640 | AW461756      | ENTPD8      | -0.130 | 0.567 | -0.055 | 0.830 | -0.227 | 0.186 | -0.003 | 0.990 |
| OLIGO_03642 | AW461803      | NCOA6       | -0.041 | 0.776 | 0.183  | 0.530 | 0.184  | 0.315 | -0.394 | 0.011 |
| OLIGO_03643 | AW461808      | TP53RK      | 0.124  | 0.429 | 0.084  | 0.659 | -0.107 | 0.386 | -0.479 | 0.009 |
| OLIGO_03644 | AW466077      | DDX47       | 0.139  | 0.417 | 0.018  | 0.951 | 0.174  | 0.338 | -0.236 | 0.203 |
| OLIGO_03645 | AW461828      | ANKH        | -0.164 | 0.540 | 0.781  | 0.159 | 0.154  | 0.608 | 0.433  | 0.081 |
| OLIGO_03646 | AW461846      | TNKS1BP1    | -0.563 | 0.225 | -0.100 | 0.647 | 0.466  | 0.160 | -0.107 | 0.608 |
| OLIGO_03647 | AW461848      | RP1-112K5.2 | 0.026  | 0.894 | 0.165  | 0.661 | 0.023  | 0.921 | 0.229  | 0.444 |
| OLIGO_03649 | AW461867      | TMEM86A     | 0.298  | 0.272 | 0.461  | 0.260 | 0.157  | 0.698 | 0.399  | 0.124 |
| OLIGO_03650 | AW461878      | LIFR        | -0.724 | 0.018 | -0.022 | 0.973 | 0.622  | 0.457 | 0.037  | 0.897 |
| OLIGO_03651 | AW461879      | SPTBN2      | -0.319 | 0.258 | 0.478  | 0.081 | 0.309  | 0.380 | -0.024 | 0.930 |
| OLIGO_03653 | AW461893      | HAND2       | -0.856 | 0.002 | 0.199  | 0.802 | -0.236 | 0.627 | 0.712  | 0.005 |
| OLIGO_03654 | AW461898      | PPM1J       | 0.066  | 0.665 | 0.532  | 0.170 | 0.056  | 0.729 | 0.311  | 0.282 |
| OLIGO_03655 | AW461905      | CFD         | -0.196 | 0.374 | -0.162 | 0.624 | 0.044  | 0.830 | -0.299 | 0.173 |
| OLIGO_03656 | AW461921      | ECT2        | 0.148  | 0.478 | 0.456  | 0.311 | 0.236  | 0.380 | -0.422 | 0.117 |
| OLIGO_03657 | AW461931      | IQGAP3      | 0.063  | 0.752 | 0.302  | 0.183 | 0.043  | 0.802 | -0.017 | 0.952 |
| OLIGO_03659 | AW461939      | ESPN        | -0.038 | 0.885 | -0.408 | 0.332 | -0.076 | 0.885 | -0.353 | 0.084 |
| OLIGO_03660 | AW461976      | NDUFV1      | 0.101  | 0.688 | -0.133 | 0.635 | 0.084  | 0.763 | -0.474 | 0.011 |
| OLIGO_03662 | AW462014      | PREP        | 0.119  | 0.299 | 0.475  | 0.263 | 0.093  | 0.567 | 0.155  | 0.410 |
| OLIGO_03663 | AW462016      | ZNF410      | 0.050  | 0.748 | 0.518  | 0.340 | 0.465  | 0.089 | -0.071 | 0.720 |
| OLIGO_03664 | AW462037      | NDRG3       | 0.062  | 0.616 | 0.464  | 0.114 | 0.554  | 0.105 | -0.103 | 0.632 |
| OLIGO_03665 | AW462041      | C16orf24    | -0.116 | 0.383 | 0.422  | 0.122 | 0.008  | 0.960 | 0.597  | 0.096 |
| OLIGO_03666 | AW462068      | KIAA1026    | -0.109 | 0.744 | -0.056 | 0.706 | -0.238 | 0.213 | -0.257 | 0.181 |
| OLIGO_03667 | AW462087      | EPB41L5     | 0.350  | 0.074 | 0.090  | 0.707 | -0.177 | 0.435 | -0.670 | 0.007 |
| OLIGO_03668 | AW462090      | DDX54       | 0.074  | 0.448 | -0.404 | 0.211 | -0.319 | 0.302 | -0.338 | 0.147 |
| OLIGO_03669 | AW462100      | M-RIP       | -0.318 | 0.169 | 0.002  | 0.995 | -0.148 | 0.544 | -0.074 | 0.767 |
| OLIGO_03670 | AW462101      | NIBP        | 0.040  | 0.777 | -0.055 | 0.901 | 0.297  | 0.227 | -0.053 | 0.791 |

|             |          |           |        |       |        |       |        |       |        |       |
|-------------|----------|-----------|--------|-------|--------|-------|--------|-------|--------|-------|
| OLIGO_03672 | AW462106 | Pfkfb2    | -0.108 | 0.506 | -0.054 | 0.876 | 0.138  | 0.695 | -0.453 | 0.018 |
| OLIGO_03674 | AW462132 | GJB3      | 0.393  | 0.269 | 0.058  | 0.848 | 0.158  | 0.397 | -0.039 | 0.817 |
| OLIGO_03677 | AW462148 | FAM100A   | 0.015  | 0.928 | 0.506  | 0.081 | 0.454  | 0.132 | 0.158  | 0.472 |
| OLIGO_03678 | AW462149 | NAPE-PLD  | -0.344 | 0.034 | -0.029 | 0.918 | -0.444 | 0.112 | -0.011 | 0.960 |
| OLIGO_03679 | AW462158 | DDX28     | 0.109  | 0.582 | -0.069 | 0.600 | 0.079  | 0.269 | -0.576 | 0.024 |
| OLIGO_03681 | AW462178 | RAB6IP2   | -0.205 | 0.182 | -0.292 | 0.474 | 0.425  | 0.314 | -0.189 | 0.391 |
| OLIGO_03682 | AW462180 | RRAD      | -0.027 | 0.931 | -0.221 | 0.425 | -0.338 | 0.160 | -0.314 | 0.232 |
| OLIGO_03683 | AW462186 | MOSPD2    | 0.119  | 0.627 | -0.205 | 0.561 | -0.479 | 0.091 | -0.211 | 0.131 |
| OLIGO_03685 | AW462195 | ITGBL1    | -0.488 | 0.210 | -0.117 | 0.703 | 0.034  | 0.852 | -0.168 | 0.480 |
| OLIGO_03686 | AW462196 | CPSF2     | 0.055  | 0.864 | -0.215 | 0.373 | 0.269  | 0.096 | -0.162 | 0.334 |
| OLIGO_03687 | AW462199 | CDC42SE2  | -0.264 | 0.232 | 0.132  | 0.648 | 0.799  | 0.026 | -0.341 | 0.122 |
| OLIGO_03688 | AW462221 | LOC535768 | -0.177 | 0.699 | -0.093 | 0.763 | 1.011  | 0.219 | 0.244  | 0.434 |
| OLIGO_03689 | AW462223 | TYRO3     | 0.061  | 0.753 | -0.139 | 0.724 | 0.631  | 0.135 | 0.211  | 0.342 |
| OLIGO_03693 | AW462250 | NAB1      | -0.388 | 0.304 | 0.184  | 0.627 | 0.024  | 0.922 | 0.411  | 0.063 |
| OLIGO_03694 | AW462258 | DNAJC8    | 0.016  | 0.945 | -0.048 | 0.788 | -0.443 | 0.058 | -0.322 | 0.140 |
| OLIGO_03695 | AW462280 | KCNJ8     | -0.495 | 0.216 | -0.265 | 0.645 | -0.014 | 0.980 | -0.622 | 0.076 |
| OLIGO_03696 | AW462294 | NUP50     | -0.065 | 0.765 | -0.136 | 0.723 | 0.643  | 0.160 | 0.197  | 0.455 |
| OLIGO_03698 | AW462390 | NAG8      | -0.201 | 0.490 | -0.242 | 0.302 | 0.274  | 0.208 | 0.025  | 0.859 |
| OLIGO_03699 | AW462404 | ATP12A    | 0.047  | 0.804 | -0.394 | 0.339 | 1.018  | 0.210 | 1.149  | 0.000 |
| OLIGO_03700 | AW462417 | EHMT1     | -0.330 | 0.022 | -0.220 | 0.712 | 0.277  | 0.375 | -0.289 | 0.071 |
| OLIGO_03702 | AW462437 | SAPS2     | 0.163  | 0.530 | 0.030  | 0.898 | 0.098  | 0.566 | -0.298 | 0.353 |
| OLIGO_03703 | AW462460 | MKX       | -0.087 | 0.739 | -0.076 | 0.778 | -0.045 | 0.833 | -0.234 | 0.163 |
| OLIGO_03704 | AW462469 | FLJ43339  | -0.351 | 0.195 | -0.173 | 0.491 | 0.082  | 0.717 | 0.267  | 0.146 |
| OLIGO_03705 | AW462477 | FPGS      | -0.101 | 0.633 | 0.352  | 0.488 | -0.084 | 0.834 | -0.122 | 0.647 |
| OLIGO_03706 | AW462482 | LYST      | -0.189 | 0.204 | 0.073  | 0.873 | -0.877 | 0.080 | -0.144 | 0.559 |
| OLIGO_03708 | AW462506 | SNAP23    | -0.013 | 0.919 | -0.232 | 0.591 | 0.461  | 0.185 | -0.396 | 0.139 |
| OLIGO_03709 | AW462539 | MAPK6     | -0.348 | 0.185 | -0.136 | 0.705 | 0.404  | 0.215 | -0.309 | 0.182 |
| OLIGO_03710 | AW462574 | MGC137146 | -0.352 | 0.055 | 0.150  | 0.689 | -0.153 | 0.446 | -0.024 | 0.902 |
| OLIGO_03712 | AW462606 | SMAD1     | -0.013 | 0.955 | -0.211 | 0.567 | 0.210  | 0.328 | -0.296 | 0.326 |
| OLIGO_03713 | AW462616 | SH2D4A    | -0.869 | 0.001 | -0.277 | 0.192 | 0.033  | 0.836 | -0.457 | 0.045 |
| OLIGO_03714 | AW462634 | DNASE1L1  | -0.037 | 0.808 | 0.112  | 0.693 | -0.228 | 0.166 | -0.093 | 0.426 |
| OLIGO_03717 | AW462672 | LOC652891 | 0.467  | 0.005 | -0.482 | 0.227 | 0.508  | 0.153 | 0.474  | 0.135 |
| OLIGO_03718 | AW462683 | TNIK      | -0.467 | 0.110 | -0.002 | 0.994 | -0.169 | 0.443 | 0.330  | 0.300 |
| OLIGO_03719 | AW462705 | CPNE3     | 0.193  | 0.563 | 0.253  | 0.317 | 0.394  | 0.113 | -0.415 | 0.034 |
| OLIGO_03720 | AW462720 | INCENP    | 0.179  | 0.567 | 0.084  | 0.782 | 0.119  | 0.475 | -0.451 | 0.032 |
| OLIGO_03721 | AW462721 | FADD      | -0.148 | 0.657 | 0.021  | 0.906 | 0.153  | 0.361 | -0.100 | 0.708 |
| OLIGO_03723 | AW462803 | C9orf25   | -0.004 | 0.986 | 0.391  | 0.235 | 0.047  | 0.738 | 0.469  | 0.101 |
| OLIGO_03725 | AW462817 | LIPH      | -0.073 | 0.645 | 0.227  | 0.477 | 0.326  | 0.303 | -0.426 | 0.009 |
| OLIGO_03726 | AW462818 | MRPS24    | 0.123  | 0.444 | -0.106 | 0.676 | 0.077  | 0.795 | -0.252 | 0.187 |
| OLIGO_03728 | AW462873 | WWC1      | 0.225  | 0.433 | 0.153  | 0.661 | -0.218 | 0.303 | 0.144  | 0.639 |
| OLIGO_03729 | AW462885 | Stk35     | 0.049  | 0.807 | -0.349 | 0.367 | -0.470 | 0.046 | -0.050 | 0.772 |
| OLIGO_03730 | AW462913 | RBM9      | -0.064 | 0.728 | -0.339 | 0.090 | -0.221 | 0.227 | -0.457 | 0.021 |
| OLIGO_03731 | AW462951 | Ptp4a2    | 0.142  | 0.340 | -0.080 | 0.739 | -0.223 | 0.281 | -0.144 | 0.452 |
| OLIGO_03732 | AW462972 | ACE       | -0.145 | 0.697 | -0.112 | 0.760 | -0.005 | 0.982 | -0.047 | 0.810 |
| OLIGO_03734 | AW463013 | CCDC12    | -0.155 | 0.603 | -0.083 | 0.682 | -0.305 | 0.074 | -0.140 | 0.542 |
| OLIGO_03735 | AW463087 | COQ2      | 0.254  | 0.307 | 0.052  | 0.774 | -0.124 | 0.481 | -0.047 | 0.687 |
| OLIGO_03736 | AW463094 | BRAF      | -0.227 | 0.421 | -0.129 | 0.524 | -0.200 | 0.468 | -0.149 | 0.338 |
| OLIGO_03738 | AW463171 | APTX      | 0.032  | 0.828 | -0.103 | 0.704 | 0.574  | 0.372 | -1.298 | 0.001 |
| OLIGO_03742 | AW463212 | DIP13B    | -0.127 | 0.487 | -0.386 | 0.112 | -0.422 | 0.192 | -0.481 | 0.027 |
| OLIGO_03743 | AW463219 | MGC137697 | -0.087 | 0.596 | 0.105  | 0.736 | 0.287  | 0.385 | -0.234 | 0.219 |
| OLIGO_03744 | AW463227 | GNG12     | -0.003 | 0.993 | -0.261 | 0.364 | -0.076 | 0.799 | 0.187  | 0.526 |
| OLIGO_03745 | AW463308 | THRAP5    | 0.273  | 0.269 | 0.596  | 0.013 | 0.107  | 0.619 | -0.047 | 0.794 |
| OLIGO_03746 | AW463310 | FBXO30    | -0.463 | 0.067 | 0.694  | 0.163 | 0.450  | 0.171 | -0.003 | 0.990 |
| OLIGO_03748 | AW463258 | PPP1R15B  | -0.172 | 0.566 | 0.577  | 0.051 | 0.607  | 0.137 | -0.008 | 0.963 |
| OLIGO_03749 | AW463281 | CCDC64    | -0.030 | 0.832 | 0.526  | 0.151 | 0.086  | 0.516 | -0.145 | 0.345 |
| OLIGO_03750 | AW463385 | TAZ       | -0.168 | 0.375 | 0.107  | 0.758 | -0.293 | 0.220 | 0.103  | 0.608 |
| OLIGO_03752 | AW463421 | EPB41L1   | -0.291 | 0.137 | 0.341  | 0.206 | 0.167  | 0.620 | 0.257  | 0.161 |
| OLIGO_03753 | AW463438 | BC002942  | 0.174  | 0.693 | -0.169 | 0.466 | -0.265 | 0.239 | -0.157 | 0.285 |
| OLIGO_03754 | AW463450 | ATP6V0E   | 0.193  | 0.525 | -0.069 | 0.765 | 0.188  | 0.544 | 0.146  | 0.489 |
| OLIGO_03755 | AW463471 | FAM43A    | -0.600 | 0.140 | -0.088 | 0.704 | -0.090 | 0.590 | -0.335 | 0.085 |

|             |          |           |        |       |        |       |        |       |        |       |
|-------------|----------|-----------|--------|-------|--------|-------|--------|-------|--------|-------|
| OLIGO_03756 | AW463474 | CENPH     | 0.146  | 0.511 | -0.524 | 0.120 | -0.850 | 0.054 | -0.727 | 0.017 |
| OLIGO_03758 | AW463498 | COL7A1    | -0.043 | 0.848 | 0.381  | 0.344 | 0.204  | 0.428 | 0.018  | 0.900 |
| OLIGO_03759 | AW463522 | UCHL1     | 0.028  | 0.894 | 0.452  | 0.182 | -0.497 | 0.335 | -0.040 | 0.890 |
| OLIGO_03761 | AW463542 | NEK7      | -0.151 | 0.640 | 0.152  | 0.537 | 0.288  | 0.182 | -0.043 | 0.847 |
| OLIGO_03764 | AW463565 | C21orf45  | -0.552 | 0.055 | -0.267 | 0.544 | -0.754 | 0.317 | -0.695 | 0.062 |
| OLIGO_03765 | AW463585 | FBXO42    | -0.430 | 0.016 | 0.339  | 0.346 | 0.492  | 0.129 | -0.042 | 0.868 |
| OLIGO_03766 | AW463590 | MLLT6     | -0.018 | 0.942 | 0.066  | 0.739 | -0.257 | 0.207 | -0.153 | 0.131 |
| OLIGO_03767 | AW463591 | ZMAT5     | -0.203 | 0.610 | -0.192 | 0.494 | -0.368 | 0.261 | -1.010 | 0.011 |
| OLIGO_03768 | AW463635 | KIAA1787  | -0.036 | 0.877 | 0.077  | 0.734 | -0.124 | 0.553 | -0.366 | 0.010 |
| OLIGO_03769 | AW463640 | SS18L1    | 0.014  | 0.940 | 0.425  | 0.084 | -0.110 | 0.497 | 0.247  | 0.140 |
| OLIGO_03770 | AW463645 | ERG       | -0.209 | 0.289 | 0.223  | 0.134 | -0.066 | 0.712 | 0.332  | 0.026 |
| OLIGO_03771 | AW463651 | C1orf91   | -0.079 | 0.587 | -0.027 | 0.921 | 0.207  | 0.447 | -0.389 | 0.042 |
| OLIGO_03772 | AW463655 | SPIN1     | 0.143  | 0.497 | 0.024  | 0.899 | 0.919  | 0.027 | -0.207 | 0.157 |
| OLIGO_03773 | AW463665 | Pea15     | -0.126 | 0.343 | 0.179  | 0.472 | -0.207 | 0.520 | -0.196 | 0.588 |
| OLIGO_03775 | AW463671 | YRDC      | -0.110 | 0.658 | 0.147  | 0.432 | 0.012  | 0.950 | 0.096  | 0.498 |
| OLIGO_03776 | AW463683 | LOC51315  | -0.345 | 0.113 | -0.181 | 0.539 | 0.070  | 0.729 | -0.019 | 0.946 |
| OLIGO_03777 | AW463689 | BXDC1     | -0.120 | 0.511 | -0.270 | 0.401 | -0.122 | 0.457 | -0.310 | 0.162 |
| OLIGO_03779 | AW463705 | SLC7A7    | 0.377  | 0.056 | 0.106  | 0.584 | 0.349  | 0.324 | 0.091  | 0.708 |
| OLIGO_03781 | AW463722 | CBLC      | 0.050  | 0.933 | -0.277 | 0.270 | 0.273  | 0.504 | -0.772 | 0.002 |
| OLIGO_03783 | AW463739 | LSM14A    | -0.049 | 0.776 | 0.097  | 0.666 | 0.287  | 0.218 | -0.257 | 0.090 |
| OLIGO_03784 | AW463747 | HIBCH     | 0.030  | 0.876 | -0.198 | 0.551 | -0.084 | 0.808 | -0.155 | 0.533 |
| OLIGO_03785 | AW463764 | C20orf30  | -0.121 | 0.226 | 0.068  | 0.788 | 0.004  | 0.989 | -0.002 | 0.982 |
| OLIGO_03786 | AW463779 | SIRT7     | -0.216 | 0.210 | 0.251  | 0.293 | -0.019 | 0.889 | -0.440 | 0.018 |
| OLIGO_03787 | AW463780 | SLC35B2   | -0.050 | 0.740 | 0.035  | 0.898 | 0.149  | 0.459 | -0.038 | 0.826 |
| OLIGO_03788 | AW463791 | SLC41A3   | -0.086 | 0.457 | -0.180 | 0.499 | -0.176 | 0.384 | -0.208 | 0.421 |
| OLIGO_03789 | AW463807 | EPS15L1   | -0.101 | 0.629 | 0.075  | 0.670 | -0.238 | 0.188 | -0.542 | 0.074 |
| OLIGO_03791 | AW463892 | GNPDA2    | -0.111 | 0.617 | 0.065  | 0.769 | 0.011  | 0.951 | -0.616 | 0.010 |
| OLIGO_03793 | AW463908 | ZNF512    | 0.143  | 0.517 | -0.199 | 0.515 | -0.317 | 0.228 | 0.121  | 0.489 |
| OLIGO_03794 | AW463916 | UBE2Q2    | -0.459 | 0.085 | -0.408 | 0.149 | 0.509  | 0.063 | -0.187 | 0.361 |
| OLIGO_03795 | AW463943 | TPCN2     | -0.305 | 0.021 | -0.424 | 0.223 | 0.266  | 0.489 | 0.228  | 0.141 |
| OLIGO_03796 | AW463968 | CYFIP2    | 0.096  | 0.753 | -0.318 | 0.542 | 0.018  | 0.952 | 0.312  | 0.431 |
| OLIGO_03799 | AW464057 | CFLAR     | -0.274 | 0.268 | -0.099 | 0.825 | 0.370  | 0.395 | 0.032  | 0.872 |
| OLIGO_03801 | AW465902 | C10orf26  | 0.042  | 0.797 | -0.126 | 0.578 | 0.312  | 0.300 | 0.181  | 0.124 |
| OLIGO_03802 | AW464118 | DUSP3     | -0.283 | 0.199 | -0.036 | 0.901 | -0.634 | 0.047 | -0.205 | 0.177 |
| OLIGO_03803 | AW464145 | LOC645781 | -0.198 | 0.321 | -0.304 | 0.550 | 0.497  | 0.234 | -0.209 | 0.495 |
| OLIGO_03804 | AW464155 | SMARCAL1  | -0.012 | 0.965 | -0.248 | 0.523 | -0.378 | 0.293 | -0.508 | 0.035 |
| OLIGO_03806 | AW464202 | PPP3CC    | -0.097 | 0.451 | -0.349 | 0.294 | -0.157 | 0.504 | 0.344  | 0.076 |
| OLIGO_03807 | AW464204 | LOC653256 | -0.011 | 0.946 | -0.115 | 0.636 | 0.046  | 0.750 | -0.210 | 0.259 |
| OLIGO_03808 | AW465425 | CCT2      | -0.013 | 0.959 | -0.326 | 0.267 | -0.005 | 0.987 | -0.225 | 0.324 |
| OLIGO_03810 | AW464245 | TOPBP1    | -0.109 | 0.431 | -0.210 | 0.565 | 0.164  | 0.712 | -0.597 | 0.008 |
| OLIGO_03815 | AW464330 | ARF5      | 0.149  | 0.428 | 0.231  | 0.552 | 0.246  | 0.430 | -0.267 | 0.074 |
| OLIGO_03818 | AW464350 | FLJ11795  | 0.320  | 0.374 | -0.108 | 0.674 | -0.256 | 0.409 | 0.293  | 0.303 |
| OLIGO_03819 | AW464391 | PDCD7     | 0.136  | 0.712 | -0.326 | 0.104 | 0.072  | 0.541 | 0.017  | 0.890 |
| OLIGO_03820 | AW464398 | DSC2      | 0.056  | 0.861 | -0.563 | 0.078 | 0.049  | 0.887 | 0.234  | 0.239 |
| OLIGO_03821 | AW464399 | C13orf24  | -0.258 | 0.226 | -0.552 | 0.162 | -0.879 | 0.097 | -0.020 | 0.933 |
| OLIGO_03822 | AW464400 | Lrrfip1   | 0.172  | 0.411 | -0.188 | 0.517 | 0.162  | 0.624 | -0.160 | 0.556 |
| OLIGO_03824 | AW464568 | PIAS3     | -0.382 | 0.021 | -0.436 | 0.048 | -0.147 | 0.639 | 0.158  | 0.299 |
| OLIGO_03830 | AW464787 | Cln3      | 0.104  | 0.682 | -0.533 | 0.047 | -0.048 | 0.818 | 0.306  | 0.146 |
| OLIGO_03833 | AW464855 | SLC36A2   | 0.144  | 0.540 | 0.246  | 0.490 | -0.332 | 0.277 | -0.006 | 0.971 |
| OLIGO_03834 | AW464871 | RHOB      | 0.094  | 0.581 | 0.308  | 0.360 | -0.395 | 0.116 | 0.531  | 0.033 |
| OLIGO_03835 | AW464916 | ANKRD47   | -0.099 | 0.338 | 0.052  | 0.852 | -0.034 | 0.866 | -0.329 | 0.144 |
| OLIGO_03838 | AW464927 | WDR26     | -0.068 | 0.620 | -0.320 | 0.370 | -0.591 | 0.085 | 0.035  | 0.886 |
| OLIGO_03841 | AW464974 | LOC507686 | -0.143 | 0.516 | 0.579  | 0.101 | 0.102  | 0.617 | 0.183  | 0.491 |
| OLIGO_03842 | AW465053 | UTP11L    | -0.364 | 0.014 | 0.459  | 0.211 | -0.136 | 0.592 | 0.239  | 0.363 |
| OLIGO_03843 | AW465093 | KCNT2     | -0.140 | 0.485 | 0.519  | 0.057 | -0.170 | 0.585 | -0.105 | 0.664 |
| OLIGO_03844 | AW465111 | MRPS18C   | 0.458  | 0.011 | 0.250  | 0.454 | 0.000  | 0.999 | -0.067 | 0.771 |
| OLIGO_03846 | AW465162 | PPTC7     | 0.190  | 0.459 | 0.109  | 0.720 | 0.022  | 0.922 | 0.343  | 0.119 |
| OLIGO_03848 | AW465195 | AXL       | 0.106  | 0.679 | 0.292  | 0.475 | 0.429  | 0.294 | 0.379  | 0.430 |
| OLIGO_03849 | AW465197 | TNC       | 0.133  | 0.659 | -0.144 | 0.649 | -0.337 | 0.513 | 0.100  | 0.671 |
| OLIGO_03850 | AW465203 | CEP63     | -0.129 | 0.613 | -0.262 | 0.485 | -0.186 | 0.490 | -0.702 | 0.002 |

|             |          |               |        |       |        |       |        |       |        |       |
|-------------|----------|---------------|--------|-------|--------|-------|--------|-------|--------|-------|
| OLIGO_03851 | AW465208 | PQLC3         | 0.291  | 0.258 | 0.207  | 0.426 | 0.245  | 0.191 | 0.212  | 0.301 |
| OLIGO_03852 | AW465213 | ZNF289        | -0.054 | 0.703 | -0.026 | 0.900 | 0.062  | 0.828 | -0.116 | 0.574 |
| OLIGO_03854 | AW465228 | CWF19L1       | 0.067  | 0.661 | 0.318  | 0.009 | 0.245  | 0.227 | 0.075  | 0.701 |
| OLIGO_03855 | AW465240 | PPP6C         | 0.217  | 0.111 | 0.095  | 0.690 | 0.154  | 0.308 | 0.093  | 0.639 |
| OLIGO_03856 | AW465249 | STX6          | -0.574 | 0.005 | 0.143  | 0.637 | 0.029  | 0.839 | 0.162  | 0.500 |
| OLIGO_03857 | AW463472 | PRG1          | 0.149  | 0.385 | -0.454 | 0.378 | 1.849  | 0.112 | 0.255  | 0.348 |
| OLIGO_03858 | AW465276 | EIF2B2        | 0.166  | 0.362 | -0.016 | 0.957 | 0.273  | 0.078 | 0.139  | 0.473 |
| OLIGO_03860 | AW465296 | TESSP2        | 0.037  | 0.930 | 0.069  | 0.860 | -0.246 | 0.392 | -0.123 | 0.704 |
| OLIGO_03862 | AW465321 | HERC1         | -0.383 | 0.053 | 0.009  | 0.973 | 0.729  | 0.053 | -0.344 | 0.167 |
| OLIGO_03863 | AW465340 | TGIF          | -0.049 | 0.859 | 0.475  | 0.234 | 0.139  | 0.581 | -0.311 | 0.213 |
| OLIGO_03864 | AW465346 | MBNL3         | -0.219 | 0.196 | -0.347 | 0.204 | 0.661  | 0.108 | 0.245  | 0.335 |
| OLIGO_03865 | AW465363 | BIRC6         | 0.023  | 0.939 | -0.345 | 0.262 | 0.038  | 0.817 | 0.168  | 0.382 |
| OLIGO_03867 | AW465385 | TAF5L         | 0.218  | 0.158 | -0.194 | 0.401 | 0.435  | 0.061 | -0.522 | 0.100 |
| OLIGO_03869 | AW465415 | GOSR1         | -0.085 | 0.625 | -0.158 | 0.625 | 0.115  | 0.592 | 0.107  | 0.550 |
| OLIGO_03871 | AW465426 | NAGLU         | -0.285 | 0.352 | -0.237 | 0.363 | -0.471 | 0.044 | 0.191  | 0.507 |
| OLIGO_03873 | AW465535 | MAN2A1        | 0.240  | 0.117 | 0.038  | 0.914 | 0.741  | 0.189 | -0.090 | 0.734 |
| OLIGO_03874 | AW465553 | VPS13A        | 0.177  | 0.258 | 0.101  | 0.746 | 0.226  | 0.192 | -0.066 | 0.770 |
| OLIGO_03875 | AW465578 | PGS1          | 0.032  | 0.817 | 0.146  | 0.684 | 0.818  | 0.003 | 0.701  | 0.076 |
| OLIGO_03876 | AW465587 | MCF2L         | -0.269 | 0.324 | -0.076 | 0.838 | 0.583  | 0.127 | -0.086 | 0.767 |
| OLIGO_03877 | AW465465 | FAM55C        | -0.397 | 0.033 | -0.103 | 0.657 | -0.519 | 0.126 | 0.191  | 0.406 |
| OLIGO_03878 | AW465490 | OLFML2A       | 0.092  | 0.638 | 0.169  | 0.282 | -0.202 | 0.286 | 0.490  | 0.009 |
| OLIGO_03880 | AW465507 | LOC497190     | -0.076 | 0.787 | -0.036 | 0.907 | -0.283 | 0.145 | -0.090 | 0.622 |
| OLIGO_03881 | AW465617 | ZNF654        | 0.098  | 0.538 | -0.002 | 0.995 | -0.197 | 0.199 | 0.176  | 0.573 |
| OLIGO_03882 | AW465633 | RSN           | 0.222  | 0.363 | -0.080 | 0.761 | 0.074  | 0.675 | 0.095  | 0.630 |
| OLIGO_03883 | AW465639 | TLN2          | -0.004 | 0.976 | 0.268  | 0.462 | 0.319  | 0.157 | -0.159 | 0.508 |
| OLIGO_03884 | AW465694 | 4932413O14Rik | -0.399 | 0.060 | 0.579  | 0.112 | -0.011 | 0.977 | 0.012  | 0.966 |
| OLIGO_03885 | AW465701 | RCOR1         | -0.408 | 0.081 | -0.291 | 0.411 | 0.071  | 0.845 | -0.140 | 0.500 |
| OLIGO_03887 | AW465775 | ZNRF1         | 0.389  | 0.295 | 0.378  | 0.297 | -0.640 | 0.083 | 0.021  | 0.941 |
| OLIGO_03888 | AW465803 | AK3L1         | -0.177 | 0.365 | -0.194 | 0.582 | -0.119 | 0.765 | 0.066  | 0.836 |
| OLIGO_03891 | AW465883 | WDR33         | 0.363  | 0.100 | 0.559  | 0.230 | 0.208  | 0.230 | 0.016  | 0.940 |
| OLIGO_03892 | AW465929 | UBE2E3        | 0.286  | 0.137 | 0.188  | 0.653 | 0.382  | 0.099 | -0.059 | 0.745 |
| OLIGO_03893 | AW465959 | SEN8          | 0.182  | 0.418 | -0.020 | 0.964 | -0.068 | 0.787 | -0.937 | 0.025 |
| OLIGO_03894 | AW465966 | VPS16         | 0.003  | 0.985 | -0.031 | 0.898 | 0.115  | 0.515 | -0.049 | 0.824 |
| OLIGO_03895 | AW466016 | WBP5          | -0.761 | 0.048 | -1.198 | 0.074 | -0.435 | 0.311 | 0.026  | 0.955 |
| OLIGO_03896 | AW466027 | NHEJ1         | 0.099  | 0.505 | -0.382 | 0.172 | 0.533  | 0.077 | 0.512  | 0.026 |
| OLIGO_03897 | AW466028 | C1orf21       | -0.213 | 0.436 | 0.063  | 0.836 | 0.356  | 0.152 | 0.519  | 0.066 |
| OLIGO_03899 | AW463063 | SPINT1        | 0.743  | 0.270 | 0.468  | 0.190 | 0.749  | 0.382 | 0.041  | 0.869 |
| OLIGO_03900 | AW466079 | ENPEP         | 0.406  | 0.294 | -0.933 | 0.299 | -0.272 | 0.751 | 0.226  | 0.465 |
| OLIGO_03901 | AW466088 | ADAM19        | -0.309 | 0.286 | -0.226 | 0.633 | 0.676  | 0.098 | 1.040  | 0.000 |
| OLIGO_03902 | AW466094 | LOC648591     | -0.086 | 0.713 | 0.306  | 0.068 | 0.024  | 0.943 | 0.026  | 0.903 |
| OLIGO_03903 | AW466096 | PARN          | 0.259  | 0.059 | -0.036 | 0.898 | 0.271  | 0.128 | 0.111  | 0.664 |
| OLIGO_03904 | AW466097 | IGSF2         | -0.316 | 0.387 | -0.104 | 0.734 | 0.419  | 0.393 | -0.162 | 0.407 |
| OLIGO_03905 | AW466135 | LOC535927     | -0.044 | 0.850 | -0.152 | 0.472 | 0.594  | 0.175 | 0.211  | 0.415 |
| OLIGO_03906 | AW466149 | C1orf168      | 0.098  | 0.764 | -0.187 | 0.540 | 0.315  | 0.321 | -0.367 | 0.131 |
| OLIGO_03908 | AW466168 | AIP           | -0.252 | 0.146 | -0.247 | 0.302 | 0.017  | 0.928 | 0.377  | 0.096 |
| OLIGO_03911 | AW466178 | POLL          | 0.249  | 0.119 | 0.281  | 0.587 | -0.331 | 0.383 | -0.251 | 0.175 |
| OLIGO_03912 | AW466185 | WAPAL         | -0.327 | 0.034 | -0.460 | 0.092 | 0.184  | 0.300 | 0.367  | 0.078 |
| OLIGO_03913 | AW466186 | C14orf111     | 0.302  | 0.135 | -0.260 | 0.143 | -0.021 | 0.855 | 0.069  | 0.693 |
| OLIGO_03914 | AW466190 | CYBRD1        | -0.309 | 0.190 | -0.131 | 0.767 | -0.272 | 0.412 | 0.942  | 0.003 |
| OLIGO_03915 | AW466194 | ITGA3         | -0.326 | 0.041 | -0.050 | 0.889 | 0.238  | 0.365 | -0.266 | 0.254 |
| OLIGO_03916 | AW466208 | EAF2          | -0.439 | 0.095 | -0.263 | 0.516 | -0.091 | 0.775 | 0.025  | 0.909 |
| OLIGO_03928 | BF040152 | USP9X         | 0.438  | 0.130 | -0.138 | 0.769 | 0.463  | 0.175 | 0.292  | 0.239 |
| OLIGO_03945 | AW466137 | SOAT1         | 0.148  | 0.462 | -0.023 | 0.949 | -0.155 | 0.598 | -0.144 | 0.418 |
| OLIGO_03946 | BF042967 | ABCD3         | 0.181  | 0.413 | -0.336 | 0.265 | 0.032  | 0.917 | 0.203  | 0.398 |
| OLIGO_03950 | BF044128 | SULT1E1       | -0.068 | 0.771 | 0.016  | 0.977 | 0.904  | 0.208 | -0.349 | 0.483 |
| OLIGO_03953 | AW462461 | ELMO3         | -0.109 | 0.727 | -0.086 | 0.817 | 0.116  | 0.826 | -0.165 | 0.395 |
| OLIGO_03955 | AW462298 | SF3B4         | 0.076  | 0.642 | -0.038 | 0.846 | -0.050 | 0.828 | 0.094  | 0.679 |
| OLIGO_03960 | AW462658 | STK24         | 0.720  | 0.018 | 0.115  | 0.694 | 0.511  | 0.087 | 0.301  | 0.376 |
| OLIGO_03962 | AW462691 | PHLDB2        | -0.186 | 0.520 | 0.112  | 0.696 | 0.209  | 0.457 | 0.120  | 0.554 |
| OLIGO_03963 | AW462702 | PIP5K2C       | 0.892  | 0.004 | 0.274  | 0.322 | 0.008  | 0.979 | -0.035 | 0.847 |

|             |          |             |        |       |        |       |        |       |        |       |
|-------------|----------|-------------|--------|-------|--------|-------|--------|-------|--------|-------|
| OLIGO_03964 | AW462703 | HYI         | 0.045  | 0.828 | 0.191  | 0.406 | 0.363  | 0.282 | 0.008  | 0.974 |
| OLIGO_03968 | AW462753 | PRRG2       | -0.226 | 0.349 | -0.024 | 0.944 | 0.086  | 0.433 | 0.423  | 0.172 |
| OLIGO_03969 | AW462799 | NAP1L5      | 0.055  | 0.817 | -0.165 | 0.637 | -0.292 | 0.295 | -0.118 | 0.662 |
| OLIGO_03970 | AW462673 | SERGEF      | 0.189  | 0.107 | -0.141 | 0.696 | 0.180  | 0.359 | 0.394  | 0.304 |
| OLIGO_03971 | AW462822 | XRCC1       | 0.176  | 0.265 | -0.255 | 0.140 | -0.156 | 0.254 | -0.011 | 0.967 |
| OLIGO_03973 | AW462844 | UBXD8       | 0.045  | 0.844 | -0.097 | 0.769 | 0.802  | 0.047 | -0.266 | 0.383 |
| OLIGO_03975 | AW463114 | MATN2       | 0.052  | 0.828 | 0.207  | 0.657 | -1.038 | 0.191 | 0.276  | 0.480 |
| OLIGO_03977 | AW463143 | ATP5L       | 0.495  | 0.046 | -0.037 | 0.884 | -0.043 | 0.771 | -0.180 | 0.227 |
| OLIGO_03978 | AW463151 | ALG2        | 0.211  | 0.335 | -0.243 | 0.460 | 0.181  | 0.610 | 0.049  | 0.765 |
| OLIGO_03979 | AW463134 | SPTLC1      | 0.109  | 0.542 | -0.108 | 0.656 | 0.159  | 0.477 | 0.236  | 0.215 |
| OLIGO_03981 | AW462979 | UBL7        | 0.078  | 0.675 | -0.256 | 0.134 | -0.043 | 0.794 | -0.104 | 0.430 |
| OLIGO_03983 | AW463057 | NQO1        | 0.489  | 0.018 | 0.652  | 0.244 | 0.285  | 0.266 | -0.229 | 0.324 |
| OLIGO_03984 | AW463048 | OSGEP       | 0.144  | 0.310 | -0.361 | 0.110 | -0.045 | 0.820 | 0.213  | 0.323 |
| OLIGO_03985 | AW463182 | TEX2        | 0.387  | 0.060 | 0.004  | 0.982 | 0.015  | 0.939 | 0.352  | 0.112 |
| OLIGO_03986 | AW463142 | PIGC        | 0.551  | 0.004 | -0.238 | 0.237 | 0.011  | 0.944 | 0.293  | 0.137 |
| OLIGO_03987 | AW462963 | FLJ13576    | 0.458  | 0.110 | -0.128 | 0.598 | 0.134  | 0.425 | 0.236  | 0.205 |
| OLIGO_03990 | BF040851 | ALG5        | -0.054 | 0.789 | -0.012 | 0.971 | -0.222 | 0.332 | -0.320 | 0.032 |
| OLIGO_03993 | BF046580 | VNN1        | -0.179 | 0.380 | -1.607 | 0.048 | 0.413  | 0.608 | 0.611  | 0.074 |
| OLIGO_03994 | BF046549 | VDR         | -0.160 | 0.462 | -0.032 | 0.881 | 0.515  | 0.132 | 0.025  | 0.913 |
| OLIGO_03995 | BF046512 | LOC508512   | -0.076 | 0.582 | -0.252 | 0.218 | 0.533  | 0.257 | -0.687 | 0.031 |
| OLIGO_03996 | BF044744 | NFKBIZ      | -0.790 | 0.015 | 0.235  | 0.445 | 0.267  | 0.134 | 0.208  | 0.387 |
| OLIGO_03998 | BF042521 | VPS4A       | 0.110  | 0.504 | 0.306  | 0.537 | 0.232  | 0.461 | 0.751  | 0.117 |
| OLIGO_04000 | BF044741 | PLN         | -0.399 | 0.047 | -0.067 | 0.877 | 0.034  | 0.850 | 0.503  | 0.155 |
| OLIGO_04001 | BF042577 | IARS2       | -0.050 | 0.690 | 0.020  | 0.938 | -0.133 | 0.527 | -0.027 | 0.906 |
| OLIGO_04003 | BF042606 | LAMC1       | 0.109  | 0.403 | 0.094  | 0.815 | 0.833  | 0.089 | 0.177  | 0.405 |
| OLIGO_04004 | BF042599 | ASXL1       | 0.586  | 0.000 | -0.441 | 0.141 | -0.190 | 0.203 | 0.559  | 0.112 |
| OLIGO_04005 | BF042921 | MGC18216    | 0.116  | 0.593 | 0.645  | 0.056 | -0.266 | 0.455 | 0.308  | 0.165 |
| OLIGO_04007 | BF042795 | RNF168      | 0.188  | 0.295 | 0.607  | 0.073 | 0.022  | 0.921 | -0.009 | 0.962 |
| OLIGO_04008 | BF042942 | DHX15       | -0.078 | 0.641 | -0.393 | 0.062 | -0.295 | 0.092 | 0.334  | 0.145 |
| OLIGO_04009 | BF040704 | CD93        | 0.157  | 0.359 | -0.293 | 0.325 | 0.051  | 0.788 | 0.305  | 0.120 |
| OLIGO_04010 | BF046332 | AP1S3       | -0.355 | 0.033 | -0.159 | 0.281 | -0.304 | 0.123 | 0.252  | 0.193 |
| OLIGO_04011 | BF044280 | PFDN4       | 0.582  | 0.008 | -0.106 | 0.790 | 0.098  | 0.794 | -0.456 | 0.127 |
| OLIGO_04015 | BF044263 | CCDC82      | -0.078 | 0.623 | -0.686 | 0.002 | -0.163 | 0.466 | 0.041  | 0.855 |
| OLIGO_04017 | BF044364 | connexin 26 | -0.447 | 0.290 | 0.348  | 0.340 | 0.879  | 0.165 | -0.505 | 0.111 |
| OLIGO_04019 | BF044560 | PLCB4       | -0.010 | 0.959 | 0.103  | 0.731 | 0.546  | 0.092 | -0.027 | 0.910 |
| OLIGO_04021 | BF044563 | ALOX5AP     | 0.057  | 0.683 | -0.026 | 0.928 | 0.360  | 0.108 | 0.264  | 0.134 |
| OLIGO_04022 | BF044458 | ATXN1       | 0.179  | 0.486 | 0.131  | 0.742 | 0.439  | 0.193 | 0.180  | 0.664 |
| OLIGO_04023 | BF044453 | NCBP1       | -0.199 | 0.526 | -0.351 | 0.190 | -0.119 | 0.530 | 0.066  | 0.764 |
| OLIGO_04025 | BF044574 | BCL6B       | -0.186 | 0.306 | 0.030  | 0.925 | 0.250  | 0.188 | 0.288  | 0.272 |
| OLIGO_04026 | BF042415 | DYM         | -0.010 | 0.953 | 0.065  | 0.841 | 0.313  | 0.298 | -0.096 | 0.625 |
| OLIGO_04028 | BF042291 | Mfhas1      | 0.162  | 0.600 | 0.691  | 0.347 | -0.976 | 0.192 | 0.337  | 0.162 |
| OLIGO_04029 | BF042459 | TFPI        | -0.105 | 0.583 | -0.820 | 0.087 | 0.528  | 0.405 | 0.999  | 0.021 |
| OLIGO_04030 | BF042441 | PLK3        | 0.164  | 0.242 | 0.040  | 0.891 | -0.092 | 0.482 | -0.109 | 0.629 |
| OLIGO_04032 | BF042464 | RASD1       | 0.074  | 0.708 | 0.486  | 0.156 | 0.294  | 0.346 | 1.014  | 0.020 |
| OLIGO_04033 | BF042461 | WDSUB1      | 0.229  | 0.198 | 0.537  | 0.175 | 0.038  | 0.815 | 0.308  | 0.177 |
| OLIGO_04034 | BF042407 | FAM20B      | 0.015  | 0.936 | 0.670  | 0.118 | 0.074  | 0.715 | 0.316  | 0.192 |
| OLIGO_04035 | AW466189 | CTSH        | 0.308  | 0.108 | 0.703  | 0.199 | 0.164  | 0.542 | 1.295  | 0.000 |
| OLIGO_04037 | BF040372 | UBOX5       | 0.038  | 0.856 | 0.122  | 0.702 | -0.138 | 0.501 | 0.495  | 0.038 |
| OLIGO_04038 | BF040395 | C10orf104   | 0.521  | 0.018 | 0.106  | 0.736 | 0.079  | 0.685 | -0.491 | 0.011 |
| OLIGO_04039 | BF040534 | HTRA2       | 0.116  | 0.673 | 0.474  | 0.090 | 0.103  | 0.233 | 0.269  | 0.118 |
| OLIGO_04040 | BF040384 | TMEM34      | 0.315  | 0.124 | 0.082  | 0.788 | 0.141  | 0.519 | 0.290  | 0.175 |
| OLIGO_04041 | BF040365 | OACT1       | -0.167 | 0.242 | -0.172 | 0.634 | 0.138  | 0.652 | -0.134 | 0.584 |
| OLIGO_04042 | BF045951 | BCL6        | -0.103 | 0.653 | 0.105  | 0.802 | 0.299  | 0.463 | -0.210 | 0.356 |
| OLIGO_04043 | BF046147 | GMPPB       | 0.866  | 0.007 | -0.272 | 0.256 | 0.289  | 0.388 | -0.349 | 0.077 |
| OLIGO_04044 | BF045945 | SPIN-2      | -0.204 | 0.515 | 0.020  | 0.953 | -0.100 | 0.785 | -0.396 | 0.033 |
| OLIGO_04045 | BF045969 | TSPAN12     | -0.417 | 0.012 | 0.674  | 0.070 | 0.230  | 0.133 | 0.442  | 0.101 |
| OLIGO_04046 | BF045970 | CCDC95      | 0.100  | 0.556 | 0.219  | 0.557 | -0.229 | 0.530 | 0.215  | 0.322 |
| OLIGO_04047 | BF045975 | C8orf1      | -0.002 | 0.991 | 0.434  | 0.306 | 0.302  | 0.479 | 0.290  | 0.080 |
| OLIGO_04048 | BF045958 | MRM1        | 0.012  | 0.922 | 0.099  | 0.614 | 0.228  | 0.121 | 0.097  | 0.532 |
| OLIGO_04051 | BF046016 | MANSC1      | 0.138  | 0.279 | -0.003 | 0.989 | 0.170  | 0.505 | -0.265 | 0.120 |



|             |          |           |        |       |        |       |        |       |        |       |
|-------------|----------|-----------|--------|-------|--------|-------|--------|-------|--------|-------|
| OLIGO_04052 | BF045987 | ATP6V0D2  | 0.155  | 0.564 | -0.035 | 0.901 | 0.650  | 0.242 | 0.406  | 0.051 |
| OLIGO_04053 | BF046162 | CPA5      | -0.607 | 0.016 | -0.118 | 0.743 | 0.358  | 0.384 | 0.557  | 0.191 |
| OLIGO_04054 | BF046125 | ARL6IP6   | 0.076  | 0.785 | -0.190 | 0.534 | 0.035  | 0.903 | -0.349 | 0.063 |
| OLIGO_04055 | BF046127 | FOXP1     | 0.073  | 0.792 | 0.303  | 0.293 | -0.261 | 0.445 | 1.012  | 0.021 |
| OLIGO_04056 | BF042273 | AOX2      | -0.214 | 0.287 | 0.279  | 0.559 | 0.413  | 0.254 | 0.765  | 0.114 |
| OLIGO_04058 | BF042251 | AMACR     | 0.065  | 0.677 | 0.112  | 0.687 | -0.451 | 0.150 | 0.296  | 0.170 |
| OLIGO_04060 | BF042172 | NCOR1     | -0.672 | 0.012 | -0.097 | 0.647 | 0.133  | 0.521 | 0.215  | 0.244 |
| OLIGO_04061 | BF042266 | GGA1      | 0.157  | 0.436 | 0.092  | 0.536 | 0.312  | 0.250 | -0.190 | 0.322 |
| OLIGO_04062 | BF042255 | DNAJB1    | 0.159  | 0.419 | -0.226 | 0.414 | 0.317  | 0.314 | 0.189  | 0.325 |
| OLIGO_04063 | BF042163 | SCAMP4    | -0.498 | 0.031 | -0.085 | 0.729 | 0.053  | 0.732 | -0.127 | 0.517 |
| OLIGO_04064 | BF040063 | PHLPL     | -0.691 | 0.006 | 0.003  | 0.987 | 0.351  | 0.359 | -0.178 | 0.358 |
| OLIGO_04065 | BF040014 | RAB18     | 0.197  | 0.315 | 0.012  | 0.962 | 0.151  | 0.553 | 0.231  | 0.218 |
| OLIGO_04066 | BF040020 | LOC653397 | 0.204  | 0.282 | -0.196 | 0.622 | -0.253 | 0.290 | -0.158 | 0.489 |
| OLIGO_04068 | BF040056 | SLC37A3   | -0.525 | 0.186 | 0.071  | 0.878 | 0.263  | 0.599 | -0.083 | 0.732 |
| OLIGO_04070 | BF040219 | CSGlcA-T  | -0.393 | 0.220 | 0.082  | 0.664 | 0.323  | 0.069 | 0.466  | 0.031 |
| OLIGO_04071 | BF040173 | Ankrd13b  | -0.086 | 0.750 | -0.056 | 0.926 | 0.700  | 0.165 | 0.140  | 0.788 |
| OLIGO_04072 | BF045800 | SEMA4B    | -0.754 | 0.006 | -0.364 | 0.170 | -0.166 | 0.263 | -0.081 | 0.739 |
| OLIGO_04073 | BF045639 | C5orf5    | -0.440 | 0.113 | -0.600 | 0.368 | -0.213 | 0.743 | -0.150 | 0.642 |
| OLIGO_04075 | BF043719 | PHOSPHO1  | -0.325 | 0.352 | -0.101 | 0.689 | -0.244 | 0.208 | -0.045 | 0.830 |
| OLIGO_04076 | BF043889 | ENPP1     | 0.202  | 0.499 | -0.636 | 0.231 | 0.801  | 0.305 | -0.648 | 0.053 |
| OLIGO_04077 | BF041787 | PPWD1     | 0.091  | 0.520 | -0.053 | 0.869 | 0.431  | 0.336 | -0.564 | 0.030 |
| OLIGO_04078 | BF041763 | HEYL      | -0.120 | 0.672 | -0.188 | 0.399 | 0.358  | 0.213 | -0.093 | 0.563 |
| OLIGO_04080 | BF041946 | IFIT2     | -0.469 | 0.295 | 0.232  | 0.645 | -0.371 | 0.286 | 0.325  | 0.226 |
| OLIGO_04081 | BF041945 | TSC22D2   | -0.156 | 0.412 | 0.193  | 0.767 | 0.706  | 0.149 | 0.330  | 0.320 |
| OLIGO_04082 | BF041910 | XPO6      | -0.475 | 0.015 | -0.102 | 0.810 | -0.216 | 0.494 | 0.417  | 0.104 |
| OLIGO_04084 | BF039711 | RMND5A    | -0.216 | 0.358 | -0.138 | 0.651 | 0.047  | 0.792 | 0.585  | 0.021 |
| OLIGO_04086 | BF039704 | CYB561D2  | 0.094  | 0.784 | -0.091 | 0.729 | -0.104 | 0.597 | 0.468  | 0.242 |
| OLIGO_04087 | BF039790 | BRWD1     | -0.243 | 0.260 | -0.673 | 0.081 | 0.046  | 0.879 | 0.132  | 0.532 |
| OLIGO_04088 | BF039792 | RAD52     | 0.498  | 0.019 | 0.191  | 0.308 | -0.101 | 0.493 | -0.062 | 0.700 |
| OLIGO_04089 | BF039791 | PVRL4     | 0.030  | 0.890 | 0.110  | 0.731 | 0.307  | 0.081 | 0.378  | 0.255 |
| OLIGO_04091 | BF039697 | IFNAR2    | -0.333 | 0.205 | 0.174  | 0.746 | -0.293 | 0.382 | -0.061 | 0.740 |
| OLIGO_04096 | BF043409 | DDX46     | 0.097  | 0.692 | -0.225 | 0.298 | 0.324  | 0.165 | -0.118 | 0.492 |
| OLIGO_04098 | BF043403 | CENTB1    | -0.162 | 0.460 | -0.241 | 0.477 | 0.211  | 0.299 | -0.056 | 0.805 |
| OLIGO_04102 | BF043570 | FBXL10    | 0.131  | 0.649 | 0.260  | 0.502 | -0.127 | 0.528 | 0.256  | 0.457 |
| OLIGO_04104 | BF043565 | NCKIPSD   | 0.144  | 0.357 | 0.080  | 0.670 | -0.049 | 0.789 | 0.178  | 0.289 |
| OLIGO_04105 | BF043562 | PSD3      | -0.564 | 0.076 | -0.358 | 0.195 | 0.058  | 0.774 | 0.070  | 0.785 |
| OLIGO_04106 | BF043586 | C3orf38   | 0.545  | 0.024 | -0.474 | 0.075 | -0.187 | 0.399 | 0.014  | 0.950 |
| OLIGO_04107 | BF228463 | SETD8     | 0.075  | 0.664 | -0.247 | 0.198 | 0.392  | 0.240 | 0.103  | 0.670 |
| OLIGO_04108 | BF043536 | OSBP2     | -0.335 | 0.285 | 0.155  | 0.711 | -0.162 | 0.440 | -0.562 | 0.078 |
| OLIGO_04110 | BF043548 | COQ9      | -0.191 | 0.332 | -0.238 | 0.294 | 0.004  | 0.978 | -0.311 | 0.060 |
| OLIGO_04111 | BF043575 | TRMU      | -0.385 | 0.129 | -0.418 | 0.108 | -0.156 | 0.533 | 0.246  | 0.192 |
| OLIGO_04112 | BF041598 | DLX3      | 0.512  | 0.069 | 0.412  | 0.063 | 0.289  | 0.138 | 0.084  | 0.762 |
| OLIGO_04113 | BF041597 | DDX23     | 0.157  | 0.358 | 0.169  | 0.652 | -0.016 | 0.940 | 0.460  | 0.273 |
| OLIGO_04114 | BF041422 | SFRS2IP   | 0.286  | 0.124 | 0.160  | 0.711 | -0.641 | 0.047 | -0.059 | 0.794 |
| OLIGO_04115 | BF041590 | FLJ41747  | -0.411 | 0.156 | 0.443  | 0.083 | 0.030  | 0.852 | 0.162  | 0.223 |
| OLIGO_04116 | BF041614 | GATA3     | 0.246  | 0.592 | 0.325  | 0.596 | 0.906  | 0.141 | 0.087  | 0.727 |
| OLIGO_04117 | BF041567 | B3GNT8    | -0.358 | 0.159 | -0.046 | 0.830 | 0.139  | 0.438 | -0.049 | 0.772 |
| OLIGO_04118 | BF041570 | LOC404066 | -0.217 | 0.204 | -0.033 | 0.872 | -0.233 | 0.132 | 0.571  | 0.011 |
| OLIGO_04120 | BF041552 | MEF2D     | -0.551 | 0.029 | 0.203  | 0.561 | -0.469 | 0.012 | 0.319  | 0.173 |
| OLIGO_04121 | BF041549 | DDX56     | -0.373 | 0.152 | -0.018 | 0.955 | -0.246 | 0.160 | 0.349  | 0.158 |
| OLIGO_04124 | BF041580 | TTC5      | 0.313  | 0.089 | 0.545  | 0.069 | -0.100 | 0.659 | 0.056  | 0.683 |
| OLIGO_04125 | BF041416 | TBC1D15   | -0.353 | 0.400 | -0.403 | 0.104 | -0.233 | 0.421 | -0.256 | 0.311 |
| OLIGO_04127 | BF041605 | NCOA2     | -0.008 | 0.980 | 0.049  | 0.868 | -0.042 | 0.879 | -0.332 | 0.074 |
| OLIGO_04128 | BF041425 | GLTP      | 0.263  | 0.118 | 0.572  | 0.207 | -0.153 | 0.566 | 0.050  | 0.811 |
| OLIGO_04130 | BF039515 | ANKRD28   | -0.044 | 0.799 | 0.272  | 0.328 | 0.206  | 0.233 | 0.211  | 0.321 |
| OLIGO_04131 | BF039528 | LEMD3     | -0.580 | 0.001 | 0.249  | 0.358 | 0.010  | 0.964 | 0.313  | 0.059 |
| OLIGO_04132 | BF039529 | PCBP2     | -0.338 | 0.174 | 0.280  | 0.169 | -0.036 | 0.760 | 0.039  | 0.775 |
| OLIGO_04133 | BF039530 | CCDC22    | -0.017 | 0.919 | 0.183  | 0.581 | -0.105 | 0.656 | -0.200 | 0.424 |
| OLIGO_04134 | BF039531 | ZNF639    | 0.007  | 0.956 | -0.034 | 0.890 | 0.667  | 0.003 | -0.158 | 0.480 |
| OLIGO_04136 | BF039550 | CHRDL1    | -0.427 | 0.105 | 0.084  | 0.828 | -0.091 | 0.598 | -0.862 | 0.023 |

|             |          |           |        |       |        |       |        |       |        |       |
|-------------|----------|-----------|--------|-------|--------|-------|--------|-------|--------|-------|
| OLIGO_04139 | BF039501 | LOC653890 | -0.041 | 0.844 | -0.100 | 0.731 | 0.001  | 0.998 | -0.350 | 0.009 |
| OLIGO_04140 | BF039496 | CNOT3     | -0.058 | 0.755 | 0.123  | 0.687 | -0.024 | 0.904 | -0.255 | 0.072 |
| OLIGO_04141 | BF039535 | SLC30A1   | 0.272  | 0.191 | 0.916  | 0.079 | 0.317  | 0.282 | 0.584  | 0.022 |
| OLIGO_04142 | BF039534 | MFSD3     | -0.109 | 0.543 | 0.880  | 0.040 | -0.003 | 0.990 | 0.283  | 0.049 |
| OLIGO_04144 | BF044966 | DDX41     | -0.060 | 0.832 | 0.247  | 0.519 | -0.172 | 0.408 | -0.062 | 0.796 |
| OLIGO_04145 | BF045150 | TBL1XR1   | 0.041  | 0.817 | 0.300  | 0.363 | -0.539 | 0.043 | -0.030 | 0.894 |
| OLIGO_04147 | BF045152 | PDGFC     | -0.246 | 0.344 | -0.523 | 0.231 | -0.402 | 0.169 | 0.178  | 0.452 |
| OLIGO_04149 | BF228464 | LOC539766 | -0.063 | 0.794 | 0.077  | 0.839 | 0.550  | 0.152 | -0.068 | 0.796 |
| OLIGO_04150 | BF045129 | MSL3L1    | -0.095 | 0.488 | 0.099  | 0.781 | -0.711 | 0.114 | -0.890 | 0.021 |
| OLIGO_04153 | BF045124 | INPP4B    | 0.016  | 0.965 | -0.248 | 0.459 | 0.797  | 0.228 | -0.065 | 0.782 |
| OLIGO_04154 | BF045140 | FGFR1OP   | -0.005 | 0.976 | -0.075 | 0.707 | 0.480  | 0.219 | 0.044  | 0.838 |
| OLIGO_04155 | BF045143 | ANKRD49   | 0.017  | 0.941 | -0.055 | 0.843 | 0.183  | 0.414 | 0.058  | 0.817 |
| OLIGO_04156 | BF045134 | IPO11     | -0.132 | 0.348 | -0.330 | 0.346 | 0.148  | 0.522 | -0.002 | 0.989 |
| OLIGO_04157 | BF045133 | BNIP3L    | -0.122 | 0.606 | -0.306 | 0.475 | -0.027 | 0.932 | 0.333  | 0.120 |
| OLIGO_04158 | BF045137 | SLC39A8   | -0.112 | 0.597 | -0.245 | 0.442 | -0.463 | 0.242 | 0.601  | 0.006 |
| OLIGO_04160 | BF045303 | OSBPL2    | -0.108 | 0.702 | -0.341 | 0.465 | -0.183 | 0.173 | 0.985  | 0.020 |
| OLIGO_04162 | BF039681 | PTK2      | 0.020  | 0.935 | -0.150 | 0.639 | 0.278  | 0.416 | -0.655 | 0.005 |
| OLIGO_04163 | BF045278 | TTRAP     | -0.060 | 0.805 | -0.370 | 0.458 | -0.112 | 0.703 | -0.296 | 0.144 |
| OLIGO_04167 | BF045293 | C8ORFK29  | -0.365 | 0.312 | 0.421  | 0.056 | 0.107  | 0.433 | 0.016  | 0.891 |
| OLIGO_04168 | BF045338 | SNORA14A  | -0.465 | 0.040 | 0.037  | 0.894 | -0.057 | 0.717 | -0.471 | 0.012 |
| OLIGO_04169 | BF045292 | HELB      | 0.302  | 0.293 | -0.106 | 0.710 | -0.318 | 0.136 | -0.453 | 0.045 |
| OLIGO_04170 | BF045348 | TAF4      | 0.147  | 0.649 | 0.042  | 0.901 | -0.001 | 0.996 | 0.081  | 0.683 |
| OLIGO_04171 | BF043142 | CNNM4     | -0.234 | 0.164 | -0.261 | 0.183 | 0.006  | 0.971 | -0.036 | 0.867 |
| OLIGO_04172 | BF043145 | LOC617548 | -0.156 | 0.726 | 0.302  | 0.362 | 0.131  | 0.569 | 0.027  | 0.898 |
| OLIGO_04173 | BF043147 | YARS      | -0.169 | 0.324 | -0.068 | 0.808 | -0.481 | 0.076 | -0.614 | 0.001 |
| OLIGO_04174 | BF043158 | CDKL5     | -0.586 | 0.267 | -0.315 | 0.161 | -0.115 | 0.438 | -0.046 | 0.880 |
| OLIGO_04175 | BF043148 | EMILIN1   | 0.080  | 0.715 | -0.169 | 0.541 | 0.214  | 0.428 | -0.258 | 0.086 |
| OLIGO_04176 | BF043150 | USP47     | -0.655 | 0.296 | -0.512 | 0.043 | -0.026 | 0.863 | 0.054  | 0.738 |
| OLIGO_04178 | BF043154 | CALD1     | -0.217 | 0.440 | -0.565 | 0.083 | -0.078 | 0.802 | 0.423  | 0.061 |
| OLIGO_04179 | BF043168 | NEK2      | -0.309 | 0.223 | -0.327 | 0.178 | 0.034  | 0.892 | -0.737 | 0.006 |
| OLIGO_04182 | BF043327 | RND2      | 0.269  | 0.378 | -0.259 | 0.482 | 0.056  | 0.791 | 0.173  | 0.330 |
| OLIGO_04183 | BF041243 | CDC23     | -0.099 | 0.737 | -0.227 | 0.504 | -0.124 | 0.577 | -0.261 | 0.261 |
| OLIGO_04184 | BF041273 | FCGR1A    | 0.075  | 0.768 | 0.381  | 0.466 | -0.157 | 0.661 | -0.139 | 0.693 |
| OLIGO_04185 | BF041253 | MLSTD1    | -0.180 | 0.416 | 0.347  | 0.295 | -0.361 | 0.215 | -0.443 | 0.030 |
| OLIGO_04188 | AW463845 | TOR1B     | -0.130 | 0.325 | 0.042  | 0.874 | -0.013 | 0.944 | -0.101 | 0.429 |
| OLIGO_04189 | BF039189 | SH2BP1    | 0.179  | 0.441 | -0.251 | 0.339 | -0.131 | 0.442 | -0.066 | 0.676 |
| OLIGO_04190 | BF039191 | GRP       | -0.419 | 0.040 | 0.209  | 0.543 | 0.299  | 0.246 | -0.102 | 0.788 |
| OLIGO_04191 | BF039087 | ZNF492    | -0.082 | 0.793 | -0.394 | 0.276 | 0.615  | 0.164 | -0.070 | 0.837 |
| OLIGO_04193 | BF039185 | PRKRIR    | -0.113 | 0.355 | -0.184 | 0.469 | -0.198 | 0.293 | -0.302 | 0.025 |
| OLIGO_04195 | BF039154 | STRN4     | -0.662 | 0.146 | -0.217 | 0.393 | -0.438 | 0.022 | -0.359 | 0.047 |
| OLIGO_04197 | BF039158 | TTC7B     | -0.072 | 0.666 | -0.253 | 0.399 | 0.039  | 0.896 | -0.525 | 0.095 |
| OLIGO_04198 | BF039097 | ST3GAL1   | -0.275 | 0.327 | -0.161 | 0.765 | 0.079  | 0.635 | 0.283  | 0.370 |
| OLIGO_04200 | BF039090 | ETV5      | 0.236  | 0.390 | -0.310 | 0.217 | -0.312 | 0.223 | 0.077  | 0.718 |
| OLIGO_04201 | BF039197 | TRIM71    | 0.288  | 0.231 | 0.012  | 0.971 | 0.087  | 0.738 | 0.226  | 0.167 |
| OLIGO_04202 | BF039345 | USP16     | 0.287  | 0.197 | -0.568 | 0.300 | -0.132 | 0.733 | -0.069 | 0.849 |
| OLIGO_04204 | BF039383 | TMPO      | -0.160 | 0.582 | -0.376 | 0.275 | -0.747 | 0.059 | -0.714 | 0.009 |
| OLIGO_04205 | BF039356 | C14orf153 | 0.098  | 0.570 | -0.261 | 0.243 | -0.483 | 0.025 | -0.721 | 0.007 |
| OLIGO_04206 | BF039358 | MYCBP2    | 0.103  | 0.498 | 0.237  | 0.357 | -0.383 | 0.040 | -0.524 | 0.010 |
| OLIGO_04209 | BF039324 | TNFRSF1B  | -0.005 | 0.981 | -0.142 | 0.721 | -0.007 | 0.982 | -0.114 | 0.669 |
| OLIGO_04211 | BF039325 | DNAJC3    | 0.027  | 0.930 | 0.300  | 0.354 | 0.324  | 0.279 | -0.042 | 0.872 |
| OLIGO_04214 | BF039329 | KCNN4     | 0.348  | 0.243 | -0.357 | 0.553 | 0.931  | 0.105 | -0.580 | 0.204 |
| OLIGO_04215 | BF039326 | C15orf26  | -0.012 | 0.969 | -0.122 | 0.724 | -0.097 | 0.742 | -0.385 | 0.234 |
| OLIGO_04217 | BF039361 | PPAN      | -0.255 | 0.488 | -0.125 | 0.267 | -0.002 | 0.987 | -0.328 | 0.082 |
| OLIGO_04218 | BF044906 | KLHL15    | 0.144  | 0.582 | -0.252 | 0.463 | 0.087  | 0.731 | -0.240 | 0.354 |
| OLIGO_04220 | BF044931 | PLCXD2    | -0.248 | 0.574 | 0.900  | 0.045 | -0.441 | 0.172 | 0.468  | 0.103 |
| OLIGO_04221 | BF044934 | MTERFD3   | -0.526 | 0.154 | -0.313 | 0.283 | 0.179  | 0.624 | -0.407 | 0.145 |
| OLIGO_04222 | BF044893 | SERPINE1  | -0.127 | 0.475 | -0.001 | 0.999 | 0.896  | 0.089 | 0.249  | 0.398 |
| OLIGO_04223 | BF044949 | BNIP1     | -0.309 | 0.337 | 0.039  | 0.939 | -0.554 | 0.288 | -0.395 | 0.275 |
| OLIGO_04225 | BF042986 | RABGGTA   | 0.039  | 0.813 | 0.361  | 0.354 | -0.239 | 0.415 | -0.267 | 0.195 |
| OLIGO_04231 | BF042956 | TCOF1     | 0.023  | 0.951 | 0.557  | 0.197 | 0.031  | 0.910 | -0.240 | 0.420 |

|             |          |               |        |       |        |       |        |       |        |       |
|-------------|----------|---------------|--------|-------|--------|-------|--------|-------|--------|-------|
| OLIGO_04232 | BF042958 | MRPL24        | 0.056  | 0.643 | -0.106 | 0.544 | -0.125 | 0.149 | -0.224 | 0.049 |
| OLIGO_04234 | BF043016 | LOC255783     | -0.020 | 0.838 | -0.033 | 0.922 | 0.054  | 0.820 | -0.115 | 0.501 |
| OLIGO_04235 | BF042972 | PHF13         | -0.138 | 0.543 | -0.211 | 0.491 | -0.442 | 0.092 | -0.409 | 0.028 |
| OLIGO_04236 | BF042975 | UBP1          | 0.236  | 0.732 | -0.230 | 0.363 | -0.292 | 0.159 | -0.593 | 0.034 |
| OLIGO_04237 | BF043032 | DNAJA5        | 0.104  | 0.555 | 0.667  | 0.131 | -0.027 | 0.896 | 0.297  | 0.178 |
| OLIGO_04239 | BF041123 | ADAMDEC1      | -0.447 | 0.160 | 0.321  | 0.625 | -0.400 | 0.333 | 0.190  | 0.607 |
| OLIGO_04240 | BF041124 | RFX4          | 0.206  | 0.462 | 0.676  | 0.059 | 0.026  | 0.909 | -0.101 | 0.722 |
| OLIGO_04242 | BF041062 | FBXO28        | -0.101 | 0.726 | -0.222 | 0.568 | -0.167 | 0.658 | -0.781 | 0.007 |
| OLIGO_04243 | BF041056 | BAT5          | -0.082 | 0.696 | -0.003 | 0.990 | 0.227  | 0.388 | -0.217 | 0.243 |
| OLIGO_04245 | BF041076 | STXBP5        | -0.179 | 0.495 | -0.078 | 0.755 | 0.204  | 0.660 | 0.283  | 0.377 |
| OLIGO_04248 | BF041110 | STAT5A        | -0.215 | 0.367 | 0.205  | 0.356 | -0.193 | 0.478 | 0.126  | 0.483 |
| OLIGO_04249 | BF046626 | HTATSF1       | 0.467  | 0.186 | -0.029 | 0.931 | 0.306  | 0.116 | -0.064 | 0.696 |
| OLIGO_04250 | BF046664 | Usp24         | -0.104 | 0.625 | 0.041  | 0.855 | -0.217 | 0.342 | -0.186 | 0.225 |
| OLIGO_04252 | BF046665 | MAPK13        | 0.077  | 0.747 | 0.113  | 0.760 | -0.306 | 0.304 | -0.493 | 0.024 |
| OLIGO_04253 | BF046601 | C3orf52       | -0.258 | 0.343 | -0.332 | 0.290 | 0.421  | 0.301 | -0.730 | 0.003 |
| OLIGO_04256 | BF046712 | DYRK3         | 0.086  | 0.541 | 0.044  | 0.782 | 0.016  | 0.875 | -0.388 | 0.103 |
| OLIGO_04257 | BF046716 | PFTK1         | 0.024  | 0.864 | 0.169  | 0.393 | -0.133 | 0.392 | 0.197  | 0.278 |
| OLIGO_04258 | BF046623 | DCI           | -0.069 | 0.714 | -0.056 | 0.722 | -0.220 | 0.130 | -0.196 | 0.125 |
| OLIGO_04259 | BF046620 | PRSS23        | 0.063  | 0.767 | -0.108 | 0.581 | -0.387 | 0.032 | -0.351 | 0.122 |
| OLIGO_04260 | BF046709 | ARFIP1        | 0.039  | 0.849 | -0.281 | 0.496 | -0.111 | 0.715 | -0.343 | 0.109 |
| OLIGO_04261 | BF044691 | FLJ20272      | 0.091  | 0.634 | -0.017 | 0.950 | 0.265  | 0.085 | -0.412 | 0.014 |
| OLIGO_04263 | BF044850 | PIGK          | -0.394 | 0.100 | -0.030 | 0.924 | 0.237  | 0.366 | 0.119  | 0.547 |
| OLIGO_04264 | BF044853 | C6orf1        | -0.223 | 0.048 | 0.290  | 0.206 | 0.230  | 0.278 | -0.279 | 0.079 |
| OLIGO_04265 | BF044848 | UBE2V2        | -0.002 | 0.988 | 0.106  | 0.713 | -0.402 | 0.050 | -0.163 | 0.451 |
| OLIGO_04266 | BF044835 | DIP2B         | -0.504 | 0.158 | 0.018  | 0.929 | -0.074 | 0.638 | -0.705 | 0.004 |
| OLIGO_04268 | BF042845 | BACE1         | -0.347 | 0.061 | 0.055  | 0.847 | -0.216 | 0.428 | -0.266 | 0.123 |
| OLIGO_04269 | BF042847 | BAMBI         | -0.144 | 0.408 | 0.001  | 0.997 | 0.280  | 0.298 | -0.100 | 0.444 |
| OLIGO_04271 | BF042689 | RPUSD4        | 0.127  | 0.651 | -0.253 | 0.364 | 0.050  | 0.815 | -0.591 | 0.016 |
| OLIGO_04272 | BF042688 | LOC647768     | -0.558 | 0.018 | -0.267 | 0.471 | 0.000  | 0.999 | -0.247 | 0.219 |
| OLIGO_04274 | BF042825 | UBPH          | 0.248  | 0.218 | 0.092  | 0.636 | -0.048 | 0.799 | 0.298  | 0.117 |
| OLIGO_04275 | BF042817 | NTHL1         | 0.089  | 0.610 | -0.118 | 0.693 | -0.777 | 0.073 | -0.248 | 0.253 |
| OLIGO_04277 | BF042818 | LOC504800     | -0.298 | 0.304 | -0.182 | 0.385 | 0.127  | 0.547 | -0.024 | 0.835 |
| OLIGO_04278 | BF042819 | ANKRD11       | -0.096 | 0.314 | 0.118  | 0.639 | -0.492 | 0.210 | -0.064 | 0.736 |
| OLIGO_04279 | BF042684 | RABGAP1L      | -0.257 | 0.604 | -0.478 | 0.118 | -0.005 | 0.982 | 0.248  | 0.177 |
| OLIGO_04280 | BF042685 | FLJ20152      | -0.054 | 0.859 | 0.039  | 0.912 | -0.472 | 0.294 | -0.151 | 0.550 |
| OLIGO_04281 | BF042837 | ELOVL2        | -0.020 | 0.957 | -0.014 | 0.940 | -0.213 | 0.255 | -0.015 | 0.916 |
| OLIGO_04282 | BF042842 | HRSP12        | 0.083  | 0.590 | 0.237  | 0.517 | -0.312 | 0.231 | -0.154 | 0.475 |
| OLIGO_04283 | BF042682 | SMEK2         | -0.179 | 0.293 | 0.094  | 0.809 | -0.203 | 0.516 | -0.161 | 0.440 |
| OLIGO_04284 | BF042829 | MBD4          | 0.001  | 0.997 | -0.084 | 0.739 | 0.534  | 0.056 | -0.594 | 0.015 |
| OLIGO_04285 | BF042832 | NANS          | 0.109  | 0.628 | -0.422 | 0.146 | 0.361  | 0.114 | 0.201  | 0.182 |
| OLIGO_04286 | BF042810 | L3MBTL        | -0.545 | 0.003 | -0.074 | 0.756 | -0.098 | 0.596 | 0.051  | 0.760 |
| OLIGO_04291 | BF040603 | TEK           | -0.074 | 0.796 | -0.304 | 0.437 | 0.056  | 0.818 | 0.135  | 0.381 |
| OLIGO_04292 | BF040621 | FEM1A         | -0.448 | 0.091 | -0.162 | 0.411 | 0.103  | 0.620 | -0.026 | 0.891 |
| OLIGO_04293 | BF040593 | LOC618210     | -0.293 | 0.454 | -0.079 | 0.791 | -0.050 | 0.872 | -0.771 | 0.026 |
| OLIGO_04294 | BF040565 | SRGAP1        | -0.425 | 0.196 | -0.127 | 0.735 | -0.161 | 0.590 | 0.048  | 0.837 |
| OLIGO_04296 | BF040614 | CPSF1         | 0.502  | 0.026 | -0.169 | 0.447 | 0.019  | 0.940 | -0.254 | 0.374 |
| OLIGO_04297 | BF040573 | ASB9          | -0.165 | 0.582 | 0.333  | 0.362 | -0.133 | 0.658 | 0.428  | 0.133 |
| OLIGO_04299 | BF040554 | Ddx5          | 0.235  | 0.255 | -0.002 | 0.994 | -0.324 | 0.064 | 0.506  | 0.043 |
| OLIGO_04300 | BF040746 | PER1          | 0.391  | 0.305 | -0.128 | 0.624 | -0.311 | 0.078 | 0.022  | 0.902 |
| OLIGO_04301 | BF040777 | FAM58A        | 0.054  | 0.693 | 0.073  | 0.688 | -0.336 | 0.034 | -0.416 | 0.023 |
| OLIGO_04304 | BF040925 | LOC508867     | 0.033  | 0.860 | 0.168  | 0.580 | 0.221  | 0.480 | 0.087  | 0.664 |
| OLIGO_04305 | BF040927 | FAM107B       | 0.018  | 0.936 | 0.345  | 0.196 | -0.367 | 0.066 | -0.065 | 0.664 |
| OLIGO_04306 | BF040926 | 4930519N16Rik | 0.091  | 0.508 | 0.132  | 0.732 | -0.092 | 0.780 | 0.118  | 0.744 |
| OLIGO_04307 | BF040764 | AGTRAP        | 0.073  | 0.781 | 0.208  | 0.431 | 1.108  | 0.055 | -0.052 | 0.794 |
| OLIGO_04308 | BF040906 | CSPG6         | -0.114 | 0.511 | 0.196  | 0.567 | 0.147  | 0.480 | -0.593 | 0.004 |
| OLIGO_04310 | BF046478 | SOCS5         | -0.182 | 0.341 | -0.182 | 0.200 | -0.003 | 0.982 | -0.449 | 0.028 |
| OLIGO_04311 | BF046444 | WHSC1         | -0.406 | 0.300 | 0.360  | 0.496 | -1.031 | 0.112 | -0.555 | 0.210 |
| OLIGO_04312 | BF046460 | HTATIP        | -0.100 | 0.467 | -0.106 | 0.692 | 0.338  | 0.228 | -0.302 | 0.118 |
| OLIGO_04313 | BF046455 | ZNF692        | -0.177 | 0.552 | 0.055  | 0.901 | -0.069 | 0.806 | 0.072  | 0.699 |

|             |          |               |        |       |        |       |        |       |        |       |
|-------------|----------|---------------|--------|-------|--------|-------|--------|-------|--------|-------|
| OLIGO_04314 | BF046419 | PGM3          | -0.026 | 0.871 | 0.059  | 0.818 | -0.054 | 0.843 | -0.494 | 0.010 |
| OLIGO_04315 | BF046469 | PHKG2         | 0.010  | 0.924 | 0.092  | 0.615 | -0.058 | 0.645 | -0.477 | 0.003 |
| OLIGO_04316 | BF046467 | ZC3H5         | 0.046  | 0.796 | 0.694  | 0.035 | 0.011  | 0.950 | 0.006  | 0.966 |
| OLIGO_04317 | BF046414 | Atp2b1        | -0.124 | 0.457 | 0.015  | 0.964 | -0.543 | 0.140 | 0.035  | 0.847 |
| OLIGO_04318 | BF046438 | SH3BGRL       | 0.118  | 0.695 | 0.013  | 0.964 | -0.225 | 0.490 | -0.290 | 0.262 |
| OLIGO_04319 | BF046433 | FLRT2         | -0.035 | 0.899 | -0.126 | 0.637 | -0.453 | 0.106 | -0.204 | 0.433 |
| OLIGO_04320 | BF046429 | LSM6          | 0.236  | 0.195 | 0.504  | 0.141 | -0.081 | 0.810 | 0.014  | 0.957 |
| OLIGO_04322 | BF044536 | 2610001J05Rik | -0.047 | 0.792 | 0.271  | 0.615 | 1.376  | 0.022 | -0.569 | 0.237 |
| OLIGO_04323 | BF044556 | OSBPL10       | 0.226  | 0.601 | 0.132  | 0.747 | 0.036  | 0.829 | -0.354 | 0.233 |
| OLIGO_04326 | BF044545 | LOC514660     | -0.208 | 0.247 | 0.286  | 0.482 | 0.307  | 0.353 | 0.304  | 0.224 |
| OLIGO_04327 | BF044502 | SLC20A1       | -0.135 | 0.612 | 0.836  | 0.074 | -0.172 | 0.504 | 0.428  | 0.039 |
| OLIGO_04328 | BF044503 | TMEM12        | -0.270 | 0.279 | 0.216  | 0.457 | -0.229 | 0.082 | -0.247 | 0.343 |
| OLIGO_04330 | BF044515 | SSBP1         | -0.127 | 0.527 | -0.479 | 0.026 | -0.121 | 0.559 | -0.297 | 0.076 |
| OLIGO_04333 | BF044520 | LZIC          | 0.150  | 0.525 | 0.549  | 0.172 | 0.066  | 0.860 | -0.052 | 0.793 |
| OLIGO_04335 | BF044511 | MGC16372      | 0.857  | 0.042 | 0.275  | 0.437 | -0.478 | 0.052 | 0.079  | 0.501 |
| OLIGO_04339 | BF042327 | NRK           | -0.353 | 0.164 | 0.581  | 0.033 | 0.033  | 0.906 | 0.126  | 0.669 |
| OLIGO_04340 | BF042333 | TMCO3         | 0.071  | 0.664 | -0.395 | 0.337 | 0.845  | 0.073 | 0.065  | 0.653 |
| OLIGO_04341 | AW466075 | TP53I11       | -0.255 | 0.306 | -0.115 | 0.769 | -0.952 | 0.021 | -0.667 | 0.005 |
| OLIGO_04343 | BF042337 | MAX           | 0.038  | 0.872 | 0.112  | 0.730 | 0.338  | 0.319 | 0.428  | 0.111 |
| OLIGO_04345 | BF042320 | ATHL1         | -0.200 | 0.112 | 0.340  | 0.242 | 0.137  | 0.493 | 0.649  | 0.036 |
| OLIGO_04346 | BF042319 | C1orf124      | -0.016 | 0.912 | -0.116 | 0.761 | -0.402 | 0.285 | 0.065  | 0.777 |
| OLIGO_04347 | BF042344 | TMEM30A       | 0.014  | 0.941 | 0.037  | 0.923 | 0.245  | 0.475 | 0.149  | 0.409 |
| OLIGO_04348 | BF042312 | CAMKK1        | -0.104 | 0.542 | 0.174  | 0.629 | -0.272 | 0.227 | -0.270 | 0.221 |
| OLIGO_04349 | BF042334 | RPS6KC1       | -0.097 | 0.537 | -0.307 | 0.115 | -0.098 | 0.492 | -0.346 | 0.074 |
| OLIGO_04351 | BF042484 | KLF3          | -0.087 | 0.774 | -0.173 | 0.272 | -0.179 | 0.460 | -0.058 | 0.774 |
| OLIGO_04355 | BF042472 | LOC650797     | 0.304  | 0.401 | 0.053  | 0.885 | -0.129 | 0.686 | -0.738 | 0.008 |
| OLIGO_04357 | BF042657 | REST          | -0.195 | 0.540 | -0.026 | 0.954 | 0.327  | 0.119 | 0.269  | 0.250 |
| OLIGO_04358 | BF042480 | KIAA0020      | -0.114 | 0.555 | 0.029  | 0.924 | -0.005 | 0.972 | -0.404 | 0.118 |
| OLIGO_04359 | BF042511 | ZCSL3         | 0.039  | 0.819 | 0.140  | 0.534 | 0.082  | 0.607 | -0.021 | 0.926 |
| OLIGO_04360 | BF042475 | LRRFIP1       | -0.216 | 0.404 | 0.141  | 0.734 | 0.022  | 0.962 | 0.188  | 0.520 |
| OLIGO_04362 | BF042479 | RAB20         | -0.031 | 0.872 | -0.258 | 0.265 | -0.291 | 0.134 | -0.241 | 0.324 |
| OLIGO_04365 | BF040436 | TUBGCP3       | -0.156 | 0.505 | 0.197  | 0.372 | -0.080 | 0.666 | -0.372 | 0.002 |
| OLIGO_04366 | BF040271 | DUSP4         | -0.365 | 0.023 | -0.129 | 0.572 | -0.080 | 0.639 | -0.162 | 0.382 |
| OLIGO_04367 | BF040440 | CASP7         | 0.092  | 0.656 | -0.209 | 0.659 | -0.085 | 0.734 | -0.365 | 0.205 |
| OLIGO_04368 | BF040439 | ACTR8         | 0.193  | 0.247 | -0.408 | 0.057 | 0.249  | 0.296 | 0.066  | 0.722 |
| OLIGO_04369 | BF040442 | NRF1          | -0.129 | 0.622 | -0.420 | 0.135 | 0.092  | 0.603 | 0.064  | 0.772 |
| OLIGO_04370 | BF040441 | SLC30A4       | -0.091 | 0.541 | -0.463 | 0.146 | 0.214  | 0.508 | 0.343  | 0.185 |
| OLIGO_04372 | BF040266 | FLJ34048      | -0.320 | 0.191 | -0.146 | 0.643 | -0.265 | 0.306 | -0.261 | 0.301 |
| OLIGO_04374 | BF040423 | MEIS2         | 0.029  | 0.895 | -0.430 | 0.512 | -0.121 | 0.481 | 0.253  | 0.175 |
| OLIGO_04376 | BF046280 | TXNDC12       | 0.028  | 0.814 | 0.128  | 0.615 | 0.036  | 0.875 | -1.057 | 0.000 |
| OLIGO_04378 | BF046285 | CYLN2         | -0.031 | 0.836 | 0.169  | 0.588 | -0.128 | 0.602 | -0.754 | 0.002 |
| OLIGO_04381 | BF046270 | GPR68         | -0.156 | 0.200 | 0.330  | 0.147 | -0.040 | 0.808 | 0.102  | 0.489 |
| OLIGO_04382 | BF046282 | TRIM41        | -0.200 | 0.407 | 0.086  | 0.707 | -0.036 | 0.803 | 0.119  | 0.370 |
| OLIGO_04383 | BF046258 | C20orf74      | -0.115 | 0.525 | 0.020  | 0.955 | 0.107  | 0.615 | -0.523 | 0.016 |
| OLIGO_04387 | BF044009 | SEC24D        | -0.042 | 0.755 | 0.106  | 0.687 | 0.314  | 0.207 | -0.292 | 0.204 |
| OLIGO_04388 | BF044011 | C9orf91       | -0.165 | 0.218 | 0.310  | 0.321 | -0.040 | 0.896 | -0.246 | 0.200 |
| OLIGO_04389 | BF044013 | IER3IP1       | -0.030 | 0.869 | 0.006  | 0.982 | 0.293  | 0.248 | -0.314 | 0.078 |
| OLIGO_04390 | BF041981 | LOC513412     | 0.199  | 0.441 | -0.278 | 0.516 | 0.050  | 0.883 | 0.248  | 0.288 |
| OLIGO_04392 | BF044029 | Elf4          | 0.028  | 0.855 | -0.222 | 0.328 | -0.097 | 0.669 | 0.012  | 0.950 |
| OLIGO_04394 | BF044178 | FLJ21106      | 0.142  | 0.566 | -0.137 | 0.752 | 0.152  | 0.551 | 0.175  | 0.378 |
| OLIGO_04395 | BF044177 | MGC72075      | -0.303 | 0.520 | -0.193 | 0.598 | -0.190 | 0.609 | -0.162 | 0.508 |
| OLIGO_04398 | BF044431 | PBX2          | -0.366 | 0.333 | -0.589 | 0.181 | 0.353  | 0.201 | 0.013  | 0.931 |
| OLIGO_04399 | BF044445 | DTNBP1        | -0.507 | 0.242 | 0.304  | 0.406 | -0.071 | 0.709 | -0.531 | 0.007 |
| OLIGO_04400 | BF044444 | EIF2B1        | 0.187  | 0.380 | 0.397  | 0.091 | 0.000  | 0.999 | -0.160 | 0.419 |
| OLIGO_04402 | BF044437 | CRIM1         | 0.127  | 0.642 | 0.284  | 0.151 | 0.072  | 0.644 | 0.068  | 0.724 |
| OLIGO_04405 | BF044426 | RSRC1         | -0.069 | 0.682 | -0.502 | 0.028 | -0.234 | 0.311 | -0.354 | 0.161 |
| OLIGO_04406 | BF044427 | CEP290        | 0.114  | 0.733 | 0.119  | 0.856 | 1.112  | 0.081 | -0.399 | 0.424 |
| OLIGO_04407 | BF044429 | FLJ21687      | -0.294 | 0.092 | -0.139 | 0.623 | -0.237 | 0.160 | -0.353 | 0.191 |
| OLIGO_04408 | BF044355 | CDCP1         | -0.286 | 0.245 | -0.167 | 0.505 | 0.231  | 0.490 | -0.202 | 0.252 |

|             |          |              |        |       |        |       |        |       |        |       |
|-------------|----------|--------------|--------|-------|--------|-------|--------|-------|--------|-------|
| OLIGO_04409 | BF044358 | C16orf57     | 0.078  | 0.475 | 0.188  | 0.470 | -0.005 | 0.985 | -0.250 | 0.146 |
| OLIGO_04410 | BF044360 | CXorf26      | -0.017 | 0.926 | -0.181 | 0.591 | -0.347 | 0.176 | -0.568 | 0.028 |
| OLIGO_04412 | BF044335 | ASB3         | -0.094 | 0.620 | -0.241 | 0.401 | -0.245 | 0.285 | -0.374 | 0.126 |
| OLIGO_04413 | BF042089 | BCKDHA       | 0.338  | 0.229 | -0.119 | 0.579 | 0.092  | 0.728 | -0.476 | 0.044 |
| OLIGO_04416 | BF042105 | ARHGEF5      | 0.204  | 0.158 | 0.273  | 0.390 | 0.304  | 0.156 | -0.283 | 0.238 |
| OLIGO_04417 | BF042198 | MGC52057     | -0.028 | 0.862 | 0.542  | 0.130 | 0.102  | 0.583 | 0.192  | 0.299 |
| OLIGO_04418 | BF045666 | ACADS        | 0.066  | 0.595 | 0.225  | 0.634 | 0.039  | 0.886 | 0.221  | 0.470 |
| OLIGO_04419 | BF042192 | PLA2G12B     | 0.400  | 0.202 | 0.135  | 0.758 | -0.435 | 0.200 | -0.473 | 0.097 |
| OLIGO_04421 | BF041997 | RCOR3        | -0.122 | 0.854 | -0.146 | 0.653 | -0.018 | 0.898 | 0.150  | 0.558 |
| OLIGO_04422 | BF041996 | C7orf26      | 0.121  | 0.648 | 0.476  | 0.229 | 0.271  | 0.230 | 0.382  | 0.034 |
| OLIGO_04423 | BF042073 | RHPN2        | -0.052 | 0.831 | 0.014  | 0.962 | 0.230  | 0.281 | 0.044  | 0.822 |
| OLIGO_04424 | BF042188 | CHD7         | -0.091 | 0.722 | -0.089 | 0.654 | -0.243 | 0.141 | -0.397 | 0.099 |
| OLIGO_04425 | BF040094 | PES1         | -0.100 | 0.717 | -0.468 | 0.129 | -0.268 | 0.240 | -0.672 | 0.006 |
| OLIGO_04426 | BF040107 | DPP3         | -0.126 | 0.462 | -0.285 | 0.288 | -0.130 | 0.592 | -0.731 | 0.000 |
| OLIGO_04428 | BF040119 | LATS2        | 0.037  | 0.835 | 0.466  | 0.230 | -0.064 | 0.770 | 0.570  | 0.024 |
| OLIGO_04429 | BF044527 | TRIM25       | -0.227 | 0.346 | 0.890  | 0.085 | -0.022 | 0.907 | 0.654  | 0.004 |
| OLIGO_04430 | BF040076 | RIPK3        | -0.372 | 0.181 | 0.260  | 0.659 | -0.208 | 0.547 | 0.185  | 0.499 |
| OLIGO_04431 | BF040261 | TIMM9        | 0.083  | 0.590 | 0.065  | 0.876 | -0.292 | 0.138 | -0.433 | 0.208 |
| OLIGO_04432 | BF040254 | EPB41L3      | 0.621  | 0.031 | 0.244  | 0.437 | 0.227  | 0.292 | -0.156 | 0.596 |
| OLIGO_04433 | BF040125 | DLK1         | 0.472  | 0.243 | 0.094  | 0.713 | -0.084 | 0.537 | -0.026 | 0.930 |
| OLIGO_04434 | BF040124 | CXorf17      | -0.056 | 0.770 | -0.020 | 0.934 | -0.163 | 0.396 | -0.205 | 0.281 |
| OLIGO_04436 | BF040079 | LOC650188    | -0.065 | 0.679 | -0.030 | 0.876 | -0.072 | 0.723 | -0.015 | 0.926 |
| OLIGO_04438 | BF040115 | RPUSD2       | 0.186  | 0.627 | -0.149 | 0.385 | -0.295 | 0.221 | -0.034 | 0.843 |
| OLIGO_04442 | BF045754 | IBRDC1       | -0.533 | 0.080 | 0.075  | 0.780 | 0.475  | 0.113 | -0.085 | 0.644 |
| OLIGO_04443 | BF045755 | GRSF1        | -0.051 | 0.708 | -0.061 | 0.824 | -0.041 | 0.826 | -0.722 | 0.007 |
| OLIGO_04444 | BF045743 | FLJ20160     | -0.265 | 0.278 | 0.116  | 0.856 | 0.441  | 0.218 | -0.451 | 0.097 |
| OLIGO_04445 | BF045762 | CCNC         | -0.091 | 0.522 | -0.189 | 0.499 | 0.245  | 0.367 | -0.192 | 0.131 |
| OLIGO_04446 | BF045912 | PLK3         | -0.210 | 0.749 | 0.132  | 0.746 | -0.145 | 0.623 | 0.552  | 0.052 |
| OLIGO_04447 | BF045905 | NUAK1        | -0.348 | 0.228 | 0.119  | 0.660 | 0.316  | 0.234 | -0.240 | 0.077 |
| OLIGO_04448 | BF045906 | HLF          | 0.473  | 0.268 | -0.288 | 0.164 | -0.140 | 0.554 | -0.510 | 0.043 |
| OLIGO_04450 | BF046097 | MGC11102     | -0.234 | 0.430 | -0.161 | 0.709 | 0.149  | 0.528 | -0.329 | 0.182 |
| OLIGO_04451 | BF046098 | ANKMY2       | 0.149  | 0.544 | -0.125 | 0.748 | -0.159 | 0.555 | -0.342 | 0.164 |
| OLIGO_04453 | BF045927 | FBXL2        | -0.387 | 0.046 | 0.207  | 0.601 | 0.239  | 0.446 | -0.183 | 0.457 |
| OLIGO_04454 | BF046114 | ALAS1        | -0.132 | 0.447 | 0.683  | 0.080 | -0.398 | 0.056 | 0.204  | 0.227 |
| OLIGO_04455 | BF046066 | ZNF350       | -0.056 | 0.846 | -0.037 | 0.914 | -0.365 | 0.235 | -0.795 | 0.013 |
| OLIGO_04456 | BF046067 | C1QTNF5      | -0.204 | 0.440 | 0.091  | 0.631 | -0.059 | 0.628 | 0.368  | 0.071 |
| OLIGO_04457 | BF045932 | MRPS11       | -0.063 | 0.693 | -0.210 | 0.379 | -0.046 | 0.712 | -0.426 | 0.018 |
| OLIGO_04458 | BF046084 | RP11-56A21.1 | -0.568 | 0.281 | -0.439 | 0.023 | 0.177  | 0.428 | -0.103 | 0.638 |
| OLIGO_04459 | BF046111 | TOMM34       | 0.168  | 0.474 | -0.139 | 0.638 | 0.153  | 0.461 | -0.562 | 0.027 |
| OLIGO_04460 | BF046054 | ATG16L1      | 0.081  | 0.631 | 0.195  | 0.591 | 0.224  | 0.576 | 0.033  | 0.887 |
| OLIGO_04461 | BF046056 | LOC441682    | 0.163  | 0.287 | 0.032  | 0.874 | -0.357 | 0.103 | -0.665 | 0.000 |
| OLIGO_04462 | BF039204 | LOC530874    | -0.087 | 0.869 | -0.083 | 0.812 | -0.166 | 0.542 | 0.255  | 0.401 |
| OLIGO_04463 | BF041832 | ENPP4        | -0.306 | 0.277 | -0.251 | 0.435 | 0.468  | 0.076 | -0.226 | 0.427 |
| OLIGO_04464 | BF041803 | CHST7        | -0.023 | 0.947 | -0.073 | 0.895 | -0.350 | 0.347 | 0.029  | 0.933 |
| OLIGO_04465 | BF041812 | PLA2G4B      | -0.737 | 0.078 | 0.253  | 0.574 | -0.049 | 0.812 | 0.345  | 0.062 |
| OLIGO_04468 | BF041814 | XLKD1        | -0.002 | 0.993 | -0.184 | 0.692 | 0.080  | 0.625 | 1.007  | 0.000 |
| OLIGO_04470 | BF041835 | C8orf4       | 0.243  | 0.689 | -0.349 | 0.069 | -0.088 | 0.621 | 0.656  | 0.011 |
| OLIGO_04471 | BF041833 | SCUBE1       | 0.145  | 0.604 | -0.188 | 0.564 | -0.124 | 0.513 | -0.504 | 0.118 |
| OLIGO_04472 | BF041839 | TLN2         | -0.024 | 0.869 | -0.054 | 0.837 | 0.133  | 0.501 | -0.785 | 0.000 |
| OLIGO_04473 | BF041825 | ASB2         | 0.001  | 0.992 | -0.012 | 0.969 | 0.327  | 0.331 | -0.360 | 0.245 |
| OLIGO_04475 | BF041798 | LAMA4        | 0.045  | 0.743 | -0.147 | 0.625 | 0.335  | 0.344 | -0.285 | 0.160 |
| OLIGO_04476 | BF041987 | LGTN         | -0.102 | 0.510 | -0.257 | 0.187 | 0.174  | 0.261 | -0.166 | 0.442 |
| OLIGO_04477 | BF041820 | TNNI3        | -0.188 | 0.622 | -0.449 | 0.155 | -0.247 | 0.328 | -0.335 | 0.280 |
| OLIGO_04479 | BF041963 | ZNF507       | -0.585 | 0.091 | -0.281 | 0.350 | -0.170 | 0.470 | 0.062  | 0.755 |
| OLIGO_04480 | BF039590 | KIAA1542     | -0.476 | 0.206 | -0.266 | 0.088 | 0.257  | 0.195 | 0.510  | 0.072 |
| OLIGO_04482 | BF039592 | Traf3        | -0.037 | 0.849 | 0.126  | 0.582 | 0.021  | 0.924 | -0.426 | 0.005 |
| OLIGO_04485 | BF039730 | SRP54        | 0.084  | 0.676 | -0.058 | 0.869 | 0.079  | 0.847 | -0.429 | 0.037 |
| OLIGO_04486 | BF039735 | LOC514189    | -0.103 | 0.843 | -0.251 | 0.441 | 0.050  | 0.835 | -0.044 | 0.830 |
| OLIGO_04487 | BF039724 | DAK          | 0.454  | 0.045 | 0.037  | 0.881 | -0.199 | 0.379 | -0.508 | 0.009 |
| OLIGO_04488 | BF039843 | ISGF3G       | 0.048  | 0.926 | 0.099  | 0.797 | -0.158 | 0.545 | 0.034  | 0.867 |

|             |          |             |        |       |        |       |        |       |        |       |
|-------------|----------|-------------|--------|-------|--------|-------|--------|-------|--------|-------|
| OLIGO_04489 | BF039834 | PCM1        | 0.351  | 0.113 | -0.571 | 0.051 | -0.410 | 0.123 | -0.239 | 0.204 |
| OLIGO_04490 | BF039750 | CTCF        | 0.160  | 0.350 | -0.260 | 0.314 | -0.006 | 0.979 | -0.189 | 0.309 |
| OLIGO_04491 | BF039737 | SIRT6       | -0.080 | 0.608 | 0.243  | 0.526 | -0.112 | 0.501 | 0.100  | 0.435 |
| OLIGO_04492 | BF039718 | ALKBH1      | 0.048  | 0.767 | -0.166 | 0.560 | -0.279 | 0.243 | -0.232 | 0.328 |
| OLIGO_04493 | BF039721 | ABHD5       | -0.066 | 0.842 | -0.180 | 0.494 | 0.159  | 0.341 | 0.332  | 0.322 |
| OLIGO_04495 | BF039936 | LOC653206   | 0.104  | 0.596 | 0.010  | 0.960 | 0.242  | 0.427 | -0.612 | 0.008 |
| OLIGO_04497 | BF039945 | DHTKD1      | 0.097  | 0.642 | 0.397  | 0.342 | -0.194 | 0.365 | 0.213  | 0.401 |
| OLIGO_04498 | BF039946 | C14orf150   | 0.053  | 0.791 | 0.368  | 0.186 | 0.192  | 0.466 | -0.327 | 0.198 |
| OLIGO_04499 | BF039822 | TREX1       | -0.101 | 0.585 | 0.158  | 0.504 | 0.352  | 0.155 | -0.503 | 0.047 |
| OLIGO_04501 | BF039826 | PTPN21      | 0.075  | 0.841 | -0.254 | 0.204 | 0.108  | 0.568 | 0.057  | 0.705 |
| OLIGO_04502 | BF039820 | PPM1M       | -0.295 | 0.363 | 0.174  | 0.304 | -0.293 | 0.275 | -0.004 | 0.979 |
| OLIGO_04503 | BF039950 | E2F6        | -0.082 | 0.778 | -0.098 | 0.638 | -0.234 | 0.072 | -0.177 | 0.374 |
| OLIGO_04505 | BF039909 | C10orf56    | -0.085 | 0.613 | 0.060  | 0.850 | -0.119 | 0.483 | 0.318  | 0.209 |
| OLIGO_04506 | BF045593 | C14orf142   | 0.232  | 0.147 | 0.129  | 0.616 | -0.451 | 0.111 | -0.387 | 0.036 |
| OLIGO_04509 | BF045587 | AATF        | -0.116 | 0.390 | -0.438 | 0.114 | -0.302 | 0.362 | -0.600 | 0.010 |
| OLIGO_04510 | BF045558 | LOC510961   | -0.218 | 0.381 | -0.193 | 0.296 | -0.213 | 0.141 | -0.842 | 0.019 |
| OLIGO_04512 | BF045616 | CCDC101     | 0.988  | 0.174 | 0.038  | 0.964 | 0.513  | 0.348 | 0.885  | 0.173 |
| OLIGO_04513 | BF045575 | PHACTR2     | -0.230 | 0.301 | 0.459  | 0.490 | 0.452  | 0.171 | 0.360  | 0.181 |
| OLIGO_04514 | BF045602 | RAB28       | 0.103  | 0.515 | 0.744  | 0.098 | 0.046  | 0.797 | -0.131 | 0.427 |
| OLIGO_04518 | BF043684 | CDYL        | 1.184  | 0.043 | 0.241  | 0.790 | -0.617 | 0.431 | 0.078  | 0.901 |
| OLIGO_04520 | BF043681 | LYZ         | 0.169  | 0.714 | -1.570 | 0.007 | -0.295 | 0.737 | 1.054  | 0.107 |
| OLIGO_04521 | BF043527 | ZNF42       | 0.008  | 0.948 | 0.119  | 0.645 | 0.472  | 0.305 | -0.602 | 0.046 |
| OLIGO_04522 | BF043717 | LOC55565    | -0.010 | 0.945 | -0.004 | 0.991 | -0.293 | 0.263 | -0.263 | 0.219 |
| OLIGO_04523 | BF043688 | TMEM16H     | 0.039  | 0.830 | -0.025 | 0.948 | -0.745 | 0.179 | -0.548 | 0.023 |
| OLIGO_04525 | BF043705 | LPAAT-THETA | 0.171  | 0.609 | 0.070  | 0.804 | 0.625  | 0.101 | -0.189 | 0.452 |
| OLIGO_04526 | BF043656 | RFX1        | -0.095 | 0.465 | 0.480  | 0.188 | 0.475  | 0.230 | -0.155 | 0.406 |
| OLIGO_04527 | BF043654 | UBE2D4      | -0.242 | 0.244 | 0.192  | 0.585 | -0.504 | 0.145 | -0.254 | 0.220 |
| OLIGO_04529 | BF043709 | DPP9        | -0.241 | 0.299 | 0.063  | 0.679 | 0.038  | 0.810 | -0.346 | 0.053 |
| OLIGO_04531 | BF043649 | SOX15       | -0.459 | 0.229 | -0.011 | 0.980 | -0.010 | 0.978 | 0.344  | 0.189 |
| OLIGO_04532 | BF043647 | MGC4268     | -0.328 | 0.169 | 0.048  | 0.875 | 0.257  | 0.527 | -0.178 | 0.265 |
| OLIGO_04534 | BF041463 | GRINL1A     | -0.266 | 0.305 | -0.330 | 0.369 | -0.318 | 0.219 | -0.682 | 0.051 |
| OLIGO_04536 | BF041447 | CENPJ       | 0.137  | 0.454 | -0.045 | 0.861 | 0.457  | 0.064 | -0.411 | 0.279 |
| OLIGO_04538 | BF041437 | IWS1        | 0.107  | 0.577 | -0.130 | 0.803 | -0.054 | 0.872 | -0.160 | 0.523 |
| OLIGO_04539 | BF041486 | TCAM1       | -0.584 | 0.035 | 0.440  | 0.350 | -0.168 | 0.702 | -0.501 | 0.134 |
| OLIGO_04541 | BF041501 | LOC515651   | -0.256 | 0.083 | 0.080  | 0.704 | 0.128  | 0.292 | -0.045 | 0.773 |
| OLIGO_04543 | BF041453 | SLC4A5      | 0.005  | 0.983 | 0.005  | 0.974 | -0.221 | 0.239 | -0.608 | 0.001 |
| OLIGO_04544 | BF041455 | POLR2I      | -0.195 | 0.248 | -0.085 | 0.706 | 0.059  | 0.646 | -0.628 | 0.001 |
| OLIGO_04545 | BF041430 | UCK1        | -0.263 | 0.335 | 0.141  | 0.787 | 0.691  | 0.081 | 0.536  | 0.137 |
| OLIGO_04547 | BF041658 | CHMP5       | 0.262  | 0.519 | -0.228 | 0.567 | -0.080 | 0.753 | -0.242 | 0.352 |
| OLIGO_04549 | BF041642 | OTUD5       | -0.068 | 0.714 | -0.023 | 0.914 | 0.191  | 0.139 | 0.188  | 0.219 |
| OLIGO_04550 | BF041635 | MGC40499    | -0.105 | 0.528 | 0.516  | 0.052 | 0.051  | 0.820 | 0.820  | 0.091 |
| OLIGO_04551 | BF041637 | GNPAT       | 0.317  | 0.245 | -0.777 | 0.232 | 0.151  | 0.713 | -0.607 | 0.140 |
| OLIGO_04554 | BF041780 | ABHD13      | -0.112 | 0.659 | 0.029  | 0.941 | -0.018 | 0.952 | 0.154  | 0.394 |
| OLIGO_04557 | BF039583 | IFT88       | -0.205 | 0.195 | -0.007 | 0.986 | -0.332 | 0.379 | -0.408 | 0.242 |
| OLIGO_04560 | BF039410 | RUSC1       | -0.026 | 0.797 | -0.090 | 0.673 | 0.162  | 0.491 | -0.079 | 0.585 |
| OLIGO_04562 | BF045424 | MRPL35      | -0.048 | 0.808 | -0.279 | 0.348 | -0.063 | 0.726 | -0.205 | 0.429 |
| OLIGO_04563 | BF045269 | ATPAF2      | -0.086 | 0.635 | -0.206 | 0.458 | 0.034  | 0.872 | -0.263 | 0.157 |
| OLIGO_04564 | BF045437 | PDE1B       | -0.181 | 0.286 | 0.279  | 0.392 | -0.113 | 0.486 | -0.322 | 0.123 |
| OLIGO_04566 | BF045439 | GBAS        | -0.046 | 0.858 | -0.171 | 0.497 | -0.025 | 0.930 | -0.409 | 0.025 |
| OLIGO_04567 | BF045445 | AKAP11      | -0.068 | 0.677 | 0.044  | 0.864 | -0.359 | 0.069 | -0.247 | 0.149 |
| OLIGO_04568 | BF045396 | MOCS3       | -0.114 | 0.643 | 0.187  | 0.391 | -0.247 | 0.170 | -0.353 | 0.028 |
| OLIGO_04569 | BF045261 | OSTN        | 0.690  | 0.480 | -1.119 | 0.030 | 0.103  | 0.811 | -1.036 | 0.053 |
| OLIGO_04570 | BF045408 | CENTB2      | -0.264 | 0.232 | -0.028 | 0.941 | 0.261  | 0.475 | -0.125 | 0.674 |
| OLIGO_04571 | BF045411 | C18orf21    | -0.172 | 0.378 | -0.021 | 0.936 | 0.107  | 0.571 | -0.641 | 0.009 |
| OLIGO_04572 | BF045443 | GIPC2       | -0.089 | 0.743 | -0.236 | 0.330 | 0.763  | 0.189 | -0.069 | 0.693 |
| OLIGO_04576 | BF043307 | NAALADL2    | -0.314 | 0.093 | -0.043 | 0.902 | 0.526  | 0.332 | -0.121 | 0.573 |
| OLIGO_04577 | BF043290 | SLC35E2     | -0.055 | 0.752 | 0.241  | 0.200 | 0.248  | 0.348 | -0.384 | 0.001 |
| OLIGO_04580 | BF043284 | PWP2H       | -0.001 | 0.996 | 0.210  | 0.643 | 0.761  | 0.094 | -0.095 | 0.541 |
| OLIGO_04582 | BF043297 | MYO6        | -0.054 | 0.788 | 0.531  | 0.185 | 0.484  | 0.060 | 0.112  | 0.679 |
| OLIGO_04585 | BF043244 | CPT2        | 0.364  | 0.072 | -0.537 | 0.053 | -0.058 | 0.811 | -0.297 | 0.233 |

|             |          |              |        |       |        |       |        |       |        |       |
|-------------|----------|--------------|--------|-------|--------|-------|--------|-------|--------|-------|
| OLIGO_04586 | BF043264 | LOC124491    | -0.161 | 0.544 | 0.192  | 0.449 | -0.020 | 0.931 | -0.102 | 0.431 |
| OLIGO_04587 | BF043254 | LOC651423    | 0.117  | 0.384 | -0.187 | 0.606 | -0.043 | 0.826 | 0.220  | 0.284 |
| OLIGO_04588 | BF043260 | DERL2        | -0.002 | 0.989 | 0.064  | 0.744 | -0.112 | 0.632 | -0.159 | 0.233 |
| OLIGO_04589 | BF043259 | KIAA0467     | -0.248 | 0.253 | 0.192  | 0.476 | -0.021 | 0.893 | -0.373 | 0.029 |
| OLIGO_04590 | BF043514 | KIAA0179     | -0.156 | 0.570 | -0.099 | 0.520 | -0.111 | 0.508 | -0.033 | 0.878 |
| OLIGO_04592 | BF043359 | MAPRE2       | 0.098  | 0.644 | -0.022 | 0.932 | -0.109 | 0.593 | -0.461 | 0.024 |
| OLIGO_04593 | BF043518 | BCL9L        | -0.474 | 0.061 | -0.143 | 0.741 | -0.036 | 0.869 | -0.156 | 0.319 |
| OLIGO_04594 | BF043496 | ENTPD4       | -0.063 | 0.763 | 0.272  | 0.284 | -0.219 | 0.323 | -0.184 | 0.219 |
| OLIGO_04595 | BF043345 | KIAA0999     | -0.181 | 0.240 | 0.441  | 0.096 | 0.167  | 0.358 | 0.014  | 0.940 |
| OLIGO_04598 | AW463678 | TMBIM1       | -0.582 | 0.055 | -0.227 | 0.421 | 0.457  | 0.302 | 0.078  | 0.656 |
| OLIGO_04601 | BF041284 | COG8         | -0.018 | 0.874 | 0.333  | 0.671 | 0.988  | 0.171 | -0.573 | 0.227 |
| OLIGO_04602 | BF041311 | Rps6ka6      | 0.164  | 0.297 | -0.207 | 0.493 | -0.091 | 0.584 | -0.423 | 0.047 |
| OLIGO_04603 | BF041310 | SPAG1        | 0.101  | 0.621 | 0.484  | 0.223 | -0.090 | 0.728 | 0.023  | 0.906 |
| OLIGO_04604 | BF041146 | C9orf89      | 0.160  | 0.302 | 0.179  | 0.360 | 0.004  | 0.983 | -0.219 | 0.169 |
| OLIGO_04606 | BF041307 | LGALS1       | -0.118 | 0.670 | 0.214  | 0.498 | -0.057 | 0.807 | -0.150 | 0.337 |
| OLIGO_04607 | BF041132 | ITGB6        | 0.004  | 0.981 | 0.741  | 0.105 | 0.060  | 0.855 | 0.030  | 0.899 |
| OLIGO_04608 | BF041131 | WNT11        | -0.016 | 0.912 | 0.171  | 0.659 | 0.286  | 0.413 | -0.243 | 0.491 |
| OLIGO_04610 | BF041138 | FOXO3A       | -0.345 | 0.117 | 0.472  | 0.327 | 0.142  | 0.697 | 0.001  | 0.996 |
| OLIGO_04612 | BF041142 | GPR137B      | 0.056  | 0.747 | 0.425  | 0.168 | -0.242 | 0.449 | 0.272  | 0.128 |
| OLIGO_04613 | BF039233 | LRP2         | -0.260 | 0.660 | -0.082 | 0.837 | -0.457 | 0.120 | -0.337 | 0.481 |
| OLIGO_04614 | BF039268 | KLHL18       | 0.072  | 0.711 | 0.302  | 0.222 | 0.387  | 0.111 | 0.047  | 0.799 |
| OLIGO_04615 | BF039248 | SH2B         | -0.014 | 0.915 | 0.106  | 0.733 | 0.288  | 0.218 | -0.361 | 0.107 |
| OLIGO_04617 | BF039240 | EP400        | -0.229 | 0.095 | 0.050  | 0.786 | -0.206 | 0.260 | -0.167 | 0.122 |
| OLIGO_04618 | BF039241 | ASGR2        | -0.164 | 0.614 | -0.070 | 0.774 | -0.395 | 0.085 | -0.477 | 0.078 |
| OLIGO_04619 | BF039256 | MAGI3        | 0.098  | 0.758 | -0.473 | 0.230 | 0.204  | 0.650 | -0.182 | 0.494 |
| OLIGO_04620 | BF039216 | DEGS1        | -0.032 | 0.877 | 0.051  | 0.878 | 0.494  | 0.063 | -0.280 | 0.224 |
| OLIGO_04621 | BF039395 | HECTD3       | 0.152  | 0.541 | 0.343  | 0.199 | 0.294  | 0.179 | -0.061 | 0.749 |
| OLIGO_04622 | BF039269 | KIAA0274     | 0.082  | 0.573 | 0.404  | 0.112 | 0.084  | 0.554 | -0.445 | 0.071 |
| OLIGO_04623 | BF039220 | LOC345222    | 0.313  | 0.605 | -0.291 | 0.349 | -0.005 | 0.975 | -0.346 | 0.356 |
| OLIGO_04624 | BF039221 | IGFBP4       | -0.015 | 0.951 | 0.203  | 0.579 | 0.382  | 0.185 | 0.157  | 0.455 |
| OLIGO_04625 | BF039218 | C17orf79     | -0.035 | 0.801 | 0.067  | 0.676 | -0.351 | 0.027 | -0.124 | 0.437 |
| OLIGO_04626 | BF039392 | FBXO25       | -0.030 | 0.791 | 0.202  | 0.303 | -0.137 | 0.586 | -0.583 | 0.029 |
| OLIGO_04629 | BF045049 | USP39        | -0.009 | 0.951 | 0.070  | 0.852 | -0.449 | 0.116 | -0.487 | 0.022 |
| OLIGO_04631 | BF045047 | RBM35A       | 0.373  | 0.096 | 0.028  | 0.930 | 0.959  | 0.081 | -0.091 | 0.712 |
| OLIGO_04632 | BF044878 | SIPA1        | -0.160 | 0.522 | 0.047  | 0.891 | 0.427  | 0.261 | -0.017 | 0.943 |
| OLIGO_04633 | BF045043 | EXOC8        | 0.012  | 0.949 | -0.028 | 0.941 | -0.278 | 0.409 | 0.133  | 0.579 |
| OLIGO_04634 | BF045060 | OSBP         | -0.204 | 0.153 | 0.884  | 0.030 | 0.274  | 0.413 | 0.098  | 0.679 |
| OLIGO_04635 | BF045014 | VPS13C       | -0.355 | 0.227 | 0.187  | 0.562 | -0.179 | 0.486 | -0.361 | 0.056 |
| OLIGO_04636 | BF045061 | MGC42174     | -0.148 | 0.354 | 0.125  | 0.737 | 0.504  | 0.150 | 0.128  | 0.455 |
| OLIGO_04637 | BF045022 | INOC1        | -0.111 | 0.378 | -0.132 | 0.633 | 0.240  | 0.085 | -0.070 | 0.663 |
| OLIGO_04639 | BF045005 | NCF4         | -0.060 | 0.763 | 0.007  | 0.989 | 0.432  | 0.248 | -0.261 | 0.143 |
| OLIGO_04640 | BF045004 | KIAA1279     | 0.000  | 0.997 | 0.183  | 0.522 | -0.263 | 0.049 | -0.453 | 0.011 |
| OLIGO_04641 | BF044881 | LOC642104    | -0.062 | 0.729 | -0.040 | 0.878 | -0.339 | 0.165 | -0.071 | 0.650 |
| OLIGO_04642 | BF044999 | MGC9850      | -0.124 | 0.550 | -0.104 | 0.544 | -0.501 | 0.038 | -0.291 | 0.076 |
| OLIGO_04643 | BF045086 | RNMT         | -0.093 | 0.663 | -0.409 | 0.208 | -0.256 | 0.310 | -0.436 | 0.053 |
| OLIGO_04644 | BF045106 | LARP2        | -0.380 | 0.143 | -0.252 | 0.420 | -0.217 | 0.318 | -0.166 | 0.419 |
| OLIGO_04645 | BF045251 | VPS18        | -0.016 | 0.906 | -0.059 | 0.878 | 0.122  | 0.700 | 0.250  | 0.249 |
| OLIGO_04646 | BF045253 | CHAF1A       | -0.108 | 0.618 | 0.045  | 0.850 | -0.271 | 0.226 | -0.309 | 0.061 |
| OLIGO_04647 | BF045064 | LRRC1        | -0.013 | 0.971 | -0.193 | 0.563 | 0.175  | 0.497 | -0.052 | 0.755 |
| OLIGO_04648 | BF045110 | BMP6         | -0.288 | 0.375 | -0.160 | 0.382 | 0.703  | 0.063 | -0.019 | 0.896 |
| OLIGO_04649 | BF045108 | PRPS2        | -0.035 | 0.850 | 0.265  | 0.222 | -0.347 | 0.310 | -0.304 | 0.070 |
| OLIGO_04650 | BF045107 | PCGF1        | -0.155 | 0.766 | -0.107 | 0.640 | 0.146  | 0.740 | -0.409 | 0.215 |
| OLIGO_04651 | BF045073 | DKFZp547C195 | 0.086  | 0.585 | -0.118 | 0.558 | 0.288  | 0.388 | -0.021 | 0.884 |
| OLIGO_04652 | BF042952 | WWC3         | -0.095 | 0.813 | -0.286 | 0.468 | 0.021  | 0.911 | -0.173 | 0.455 |
| OLIGO_04653 | BF043121 | STK17B       | -0.198 | 0.407 | 0.043  | 0.942 | -0.883 | 0.125 | -0.018 | 0.940 |
| OLIGO_04655 | BF043141 | GPR107       | -0.338 | 0.160 | 0.069  | 0.791 | -0.236 | 0.294 | -0.004 | 0.977 |
| OLIGO_04656 | BF043085 | INTS5        | 0.028  | 0.921 | 0.380  | 0.150 | -0.180 | 0.163 | 0.029  | 0.848 |
| OLIGO_04658 | BF043077 | SCRIB        | -0.054 | 0.779 | 0.075  | 0.733 | -0.015 | 0.908 | -0.026 | 0.857 |
| OLIGO_04659 | BF043079 | ITSN1        | 0.032  | 0.845 | -0.152 | 0.588 | -0.074 | 0.684 | 0.016  | 0.905 |
| OLIGO_04660 | BF043133 | FRAG1        | -0.170 | 0.280 | -0.002 | 0.997 | 0.279  | 0.427 | -0.718 | 0.054 |

|             |          |           |        |       |        |       |        |       |        |       |
|-------------|----------|-----------|--------|-------|--------|-------|--------|-------|--------|-------|
| OLIGO_04661 | BF043067 | ARHGEF3   | -0.486 | 0.052 | 0.014  | 0.965 | -0.453 | 0.265 | 0.381  | 0.211 |
| OLIGO_04663 | BF043070 | MGC17624  | 0.317  | 0.170 | -0.195 | 0.278 | 0.299  | 0.239 | -0.498 | 0.024 |
| OLIGO_04664 | BF041041 | C10orf32  | -0.092 | 0.506 | 0.034  | 0.874 | 0.117  | 0.657 | -0.124 | 0.463 |
| OLIGO_04665 | BF041204 | ZXDB      | -0.349 | 0.212 | 0.092  | 0.633 | 0.115  | 0.498 | -0.721 | 0.001 |
| OLIGO_04667 | BF041044 | CD200R2   | -0.158 | 0.423 | -0.377 | 0.275 | 0.179  | 0.321 | 0.087  | 0.677 |
| OLIGO_04669 | BF041210 | LOC530874 | -0.227 | 0.526 | -0.595 | 0.211 | 0.601  | 0.394 | -0.484 | 0.083 |
| OLIGO_04670 | BF041209 | RIP       | 0.193  | 0.309 | -0.303 | 0.255 | -0.082 | 0.536 | -0.082 | 0.653 |
| OLIGO_04673 | BF041177 | SLC44A1   | -0.082 | 0.668 | -0.203 | 0.477 | 0.181  | 0.575 | -0.455 | 0.024 |
| OLIGO_04675 | BF041171 | C1orf82   | 0.504  | 0.053 | -0.353 | 0.216 | 0.116  | 0.602 | -0.190 | 0.341 |
| OLIGO_04676 | BF041174 | BCL6      | 0.156  | 0.763 | 0.151  | 0.626 | 0.166  | 0.647 | -0.247 | 0.219 |
| OLIGO_04677 | BF041037 | BMP2K     | -0.047 | 0.792 | 0.508  | 0.083 | 0.193  | 0.276 | -0.037 | 0.853 |
| OLIGO_04680 | BF041187 | GRHL1     | 0.678  | 0.062 | 0.056  | 0.868 | 0.111  | 0.653 | -0.160 | 0.575 |
| OLIGO_04681 | BF039023 | HOOK2     | -0.065 | 0.772 | -0.088 | 0.651 | -0.256 | 0.193 | -0.309 | 0.148 |
| OLIGO_04682 | BF039039 | CD80      | -1.302 | 0.031 | 0.108  | 0.876 | -1.386 | 0.134 | 0.613  | 0.066 |
| OLIGO_04683 | BF039041 | CDC42BPG  | -0.167 | 0.343 | 0.226  | 0.693 | 0.607  | 0.198 | 0.174  | 0.417 |
| OLIGO_04685 | BF039035 | EEF1E1    | -0.146 | 0.393 | 0.274  | 0.512 | -0.015 | 0.942 | -0.299 | 0.078 |
| OLIGO_04686 | BF039110 | FLJ13197  | -0.072 | 0.817 | 0.198  | 0.669 | 0.225  | 0.492 | 0.152  | 0.584 |
| OLIGO_04687 | BF039112 | C14orf1   | -0.005 | 0.978 | 0.121  | 0.747 | -0.363 | 0.361 | -0.386 | 0.037 |
| OLIGO_04690 | BF039020 | KIF2C     | -0.280 | 0.302 | 0.276  | 0.354 | -0.319 | 0.291 | -0.124 | 0.501 |
| OLIGO_04691 | BF039118 | MRPL48    | 0.304  | 0.172 | -0.102 | 0.676 | -0.116 | 0.453 | -0.159 | 0.404 |
| OLIGO_04693 | BF039045 | DLX5      | -5.765 | 0.000 | -0.289 | 0.281 | 0.617  | 0.315 | 0.224  | 0.359 |
| OLIGO_04694 | BF039104 | STS-1     | -0.184 | 0.177 | 0.457  | 0.140 | 0.145  | 0.400 | -0.310 | 0.067 |
| OLIGO_04695 | BF039067 | ARRB2     | -0.295 | 0.242 | 0.268  | 0.366 | -0.070 | 0.686 | -0.603 | 0.038 |
| OLIGO_04696 | BF039066 | SPSB3     | 0.483  | 0.380 | -0.020 | 0.955 | -0.147 | 0.481 | -0.456 | 0.098 |
| OLIGO_04698 | BF039148 | PLA2R1    | -0.091 | 0.758 | 0.588  | 0.106 | 0.173  | 0.457 | -0.433 | 0.128 |
| OLIGO_04700 | BF039138 | PPP1R3C   | -0.129 | 0.386 | 0.003  | 0.993 | -0.474 | 0.061 | -0.441 | 0.048 |
| OLIGO_04703 | BF039272 | ZNF710    | -0.070 | 0.656 | 0.772  | 0.027 | -0.093 | 0.600 | 0.136  | 0.306 |
| OLIGO_04704 | BF039131 | CAPN6     | -0.192 | 0.475 | 0.483  | 0.362 | 0.677  | 0.317 | 0.158  | 0.545 |
| OLIGO_04705 | BF044826 | GPR89A    | -0.086 | 0.627 | 0.569  | 0.054 | 0.186  | 0.325 | -0.349 | 0.165 |
| OLIGO_04707 | BF044809 | LOC155060 | 0.077  | 0.698 | 0.224  | 0.657 | 0.450  | 0.262 | 0.340  | 0.137 |
| OLIGO_04709 | BF044804 | SOX6      | -0.554 | 0.181 | -0.007 | 0.984 | 0.485  | 0.260 | -0.697 | 0.040 |
| OLIGO_04710 | BF044806 | RBM19     | -0.058 | 0.678 | -0.264 | 0.514 | 0.209  | 0.641 | -0.021 | 0.950 |
| OLIGO_04711 | BF044776 | UBE2A     | -0.066 | 0.643 | -0.105 | 0.695 | -0.535 | 0.100 | -0.565 | 0.043 |
| OLIGO_04712 | BF044778 | TIMM22    | 0.145  | 0.336 | -0.203 | 0.347 | -0.539 | 0.063 | -0.537 | 0.009 |
| OLIGO_04713 | BF044819 | C1orf121  | 0.223  | 0.263 | -0.462 | 0.205 | -0.378 | 0.203 | -0.177 | 0.554 |
| OLIGO_04714 | BF044825 | POMGNT1   | -0.141 | 0.314 | 0.203  | 0.432 | 0.418  | 0.357 | -0.172 | 0.415 |
| OLIGO_04715 | BF044789 | FAM82C    | -0.023 | 0.864 | 0.123  | 0.649 | 0.009  | 0.967 | -0.432 | 0.087 |
| OLIGO_04717 | BF044791 | ZNF259    | 0.101  | 0.577 | 0.398  | 0.170 | 0.132  | 0.544 | 0.080  | 0.638 |
| OLIGO_04718 | BF044783 | FLJ10241  | -0.662 | 0.186 | 0.160  | 0.542 | -0.217 | 0.139 | -0.480 | 0.031 |
| OLIGO_04719 | BF044815 | BZRP      | -0.230 | 0.494 | 0.397  | 0.263 | 0.020  | 0.945 | 0.310  | 0.059 |
| OLIGO_04721 | BF042879 | CKAP2L    | 0.150  | 0.253 | 0.089  | 0.735 | -0.174 | 0.424 | -0.874 | 0.000 |
| OLIGO_04723 | BF042913 | NOMO1     | -0.172 | 0.271 | 0.121  | 0.815 | 0.424  | 0.308 | -0.441 | 0.039 |
| OLIGO_04726 | BF042909 | SFRS9     | -0.534 | 0.099 | 0.222  | 0.567 | -0.217 | 0.440 | -0.340 | 0.259 |
| OLIGO_04727 | BF042874 | PIK3C2A   | -0.234 | 0.453 | -0.160 | 0.613 | 0.313  | 0.276 | 0.496  | 0.018 |
| OLIGO_04729 | BF043035 | COPS3     | 0.028  | 0.840 | 0.137  | 0.668 | 0.170  | 0.419 | 0.097  | 0.445 |
| OLIGO_04730 | BF042900 | EBAG9     | -0.069 | 0.655 | 0.069  | 0.786 | -0.166 | 0.339 | -0.482 | 0.030 |
| OLIGO_04732 | BF041013 | RANBP10   | -0.170 | 0.332 | -0.004 | 0.992 | -0.359 | 0.248 | -0.323 | 0.131 |
| OLIGO_04738 | BF040980 | MXD4      | -0.365 | 0.251 | 0.145  | 0.763 | 0.611  | 0.082 | -0.365 | 0.208 |
| OLIGO_04739 | BF041010 | SMG7      | -0.022 | 0.905 | 0.120  | 0.716 | -0.141 | 0.517 | 0.043  | 0.827 |
| OLIGO_04741 | BF040997 | NR2F2     | -0.202 | 0.626 | -0.389 | 0.477 | -0.567 | 0.250 | 0.053  | 0.849 |
| OLIGO_04742 | BF040950 | DDO       | -0.608 | 0.022 | 0.177  | 0.525 | 0.084  | 0.746 | -0.283 | 0.205 |
| OLIGO_04746 | BF046685 | TRPC1     | -0.031 | 0.892 | -0.207 | 0.499 | -0.471 | 0.166 | 0.186  | 0.371 |
| OLIGO_04747 | BF046644 | SMC1L1    | -0.117 | 0.380 | -0.158 | 0.652 | -0.074 | 0.767 | -1.003 | 0.001 |
| OLIGO_04748 | BF046697 | AP1S1     | -0.116 | 0.414 | 0.191  | 0.383 | -0.039 | 0.783 | -0.495 | 0.000 |
| OLIGO_04751 | BF046704 | HBQ1      | -0.043 | 0.722 | 0.102  | 0.877 | 0.196  | 0.502 | -0.315 | 0.156 |
| OLIGO_04752 | BF046650 | LPP       | -0.464 | 0.138 | -0.560 | 0.228 | -0.138 | 0.645 | 0.309  | 0.086 |
| OLIGO_04753 | BF046692 | WASL      | 0.144  | 0.417 | -0.058 | 0.735 | 0.093  | 0.507 | 0.055  | 0.722 |
| OLIGO_04755 | BF044664 | TMEM102   | 0.061  | 0.938 | -0.117 | 0.763 | 0.017  | 0.961 | -0.256 | 0.370 |
| OLIGO_04756 | BF044631 | FAM8A1    | -0.058 | 0.820 | 0.135  | 0.630 | 0.062  | 0.797 | 0.136  | 0.325 |
| OLIGO_04757 | BF044671 | SHC1      | -0.032 | 0.803 | -0.239 | 0.341 | 0.242  | 0.308 | -0.117 | 0.465 |



|             |          |           |        |       |        |       |        |       |        |       |
|-------------|----------|-----------|--------|-------|--------|-------|--------|-------|--------|-------|
| OLIGO_04758 | BF044669 | LOC651894 | 0.233  | 0.440 | -0.208 | 0.529 | -0.215 | 0.222 | -0.224 | 0.187 |
| OLIGO_04759 | BF044638 | KLC2      | -0.173 | 0.296 | 0.120  | 0.568 | -0.228 | 0.169 | -0.170 | 0.321 |
| OLIGO_04760 | BF044640 | PTPN2     | 0.017  | 0.939 | 0.072  | 0.634 | -0.101 | 0.415 | -0.332 | 0.006 |
| OLIGO_04761 | BF044609 | C1orf210  | -0.037 | 0.741 | 0.396  | 0.159 | 0.186  | 0.344 | -0.749 | 0.000 |
| OLIGO_04764 | BF044628 | CDK7      | 0.311  | 0.163 | -0.325 | 0.258 | 0.201  | 0.545 | 0.149  | 0.563 |
| OLIGO_04765 | BF044618 | RGS12     | -0.083 | 0.765 | -0.154 | 0.536 | -0.012 | 0.950 | 0.021  | 0.912 |
| OLIGO_04766 | BF044672 | MAT2A     | -0.007 | 0.971 | -0.169 | 0.423 | -0.244 | 0.310 | 0.074  | 0.628 |
| OLIGO_04769 | BF042724 | MTMR11    | -0.481 | 0.019 | -0.103 | 0.721 | -0.286 | 0.175 | -0.515 | 0.085 |
| OLIGO_04771 | BF042728 | CDCA4     | 0.081  | 0.518 | 0.308  | 0.236 | -0.186 | 0.467 | -0.745 | 0.000 |
| OLIGO_04773 | BF042744 | HPCAL1    | -0.140 | 0.583 | 0.419  | 0.164 | 0.289  | 0.232 | -1.064 | 0.004 |
| OLIGO_04774 | BF042752 | UEV3      | 0.535  | 0.035 | 0.392  | 0.161 | -0.265 | 0.297 | -0.145 | 0.348 |
| OLIGO_04776 | BF042710 | BCCIP     | 0.178  | 0.499 | -0.080 | 0.678 | 0.228  | 0.207 | -0.314 | 0.042 |
| OLIGO_04777 | BF042572 | TESC      | -0.058 | 0.853 | 0.002  | 0.995 | -0.124 | 0.511 | -0.390 | 0.161 |
| OLIGO_04778 | BF042573 | DPF3      | -0.103 | 0.604 | -0.169 | 0.621 | -0.308 | 0.011 | 0.271  | 0.149 |
| OLIGO_04779 | BF042741 | CARHSP1   | 0.062  | 0.708 | -0.109 | 0.707 | -0.105 | 0.623 | -0.180 | 0.551 |
| OLIGO_04780 | BF042743 | MLL4      | -0.086 | 0.626 | 0.032  | 0.925 | -0.313 | 0.278 | -0.050 | 0.808 |
| OLIGO_04781 | BF040469 | HIPK3     | 0.072  | 0.752 | 0.227  | 0.368 | 0.099  | 0.676 | -0.297 | 0.278 |
| OLIGO_04783 | BF040472 | FAM98A    | 0.033  | 0.846 | 0.267  | 0.473 | -0.280 | 0.152 | -0.690 | 0.088 |
| OLIGO_04785 | BF040634 | BLZF1     | -0.117 | 0.808 | 0.198  | 0.531 | 0.341  | 0.289 | -0.491 | 0.033 |
| OLIGO_04787 | BF040638 | GAL3ST3   | 0.182  | 0.524 | 0.147  | 0.830 | -0.180 | 0.795 | -0.182 | 0.690 |
| OLIGO_04789 | BF040456 | ADRB2     | -0.137 | 0.402 | 0.056  | 0.828 | -0.360 | 0.385 | -0.271 | 0.245 |
| OLIGO_04790 | BF040497 | SNAPC1    | -0.230 | 0.485 | 0.308  | 0.532 | -0.785 | 0.090 | -0.449 | 0.009 |
| OLIGO_04791 | BF040641 | CHIC2     | 0.255  | 0.291 | 0.375  | 0.354 | -0.632 | 0.018 | -0.009 | 0.960 |
| OLIGO_04792 | BF040487 | CES2      | 0.276  | 0.345 | 0.265  | 0.334 | 0.089  | 0.779 | -0.501 | 0.059 |
| OLIGO_04794 | BF040813 | STAM      | 0.078  | 0.704 | 0.236  | 0.363 | 0.072  | 0.789 | -0.117 | 0.542 |
| OLIGO_04796 | BF040826 | NRP2      | -0.220 | 0.350 | 0.059  | 0.820 | 0.289  | 0.313 | -0.014 | 0.942 |
| OLIGO_04797 | BF040793 | NKIRAS2   | 0.027  | 0.936 | -0.007 | 0.959 | -0.143 | 0.587 | -0.308 | 0.072 |
| OLIGO_04798 | BF040790 | AHDC1     | -0.245 | 0.193 | 0.488  | 0.125 | 0.123  | 0.721 | -0.570 | 0.044 |
| OLIGO_04799 | BF040787 | STX10     | -0.267 | 0.091 | 0.222  | 0.114 | 0.023  | 0.876 | 0.336  | 0.126 |
| OLIGO_04800 | BF040784 | BCDIN3    | -0.047 | 0.761 | 0.371  | 0.168 | -0.120 | 0.562 | -0.265 | 0.065 |
| OLIGO_04801 | BF040805 | ISOC2     | -0.201 | 0.271 | 0.354  | 0.151 | 0.044  | 0.631 | -0.206 | 0.141 |
| OLIGO_04803 | BF040798 | UBE3A     | 0.083  | 0.771 | 0.134  | 0.682 | 0.038  | 0.803 | 0.229  | 0.331 |
| OLIGO_04805 | BF040834 | LUZP1     | 0.028  | 0.893 | 0.261  | 0.332 | -0.139 | 0.506 | 0.196  | 0.152 |
| OLIGO_04806 | BF046367 | LDLRAP1   | -0.032 | 0.886 | 0.133  | 0.466 | 0.108  | 0.648 | -0.406 | 0.026 |
| OLIGO_04807 | BF046366 | SON       | 0.101  | 0.448 | -0.004 | 0.985 | -0.250 | 0.139 | 0.002  | 0.988 |
| OLIGO_04808 | BF046404 | PDE4D     | -0.204 | 0.356 | -0.070 | 0.809 | -0.390 | 0.255 | -0.030 | 0.880 |
| OLIGO_04809 | BF046402 | FBXO40    | -0.047 | 0.657 | 0.282  | 0.562 | -0.466 | 0.116 | 0.326  | 0.102 |
| OLIGO_04810 | BF046384 | GMEB2     | -0.099 | 0.766 | -0.192 | 0.674 | -0.199 | 0.469 | -0.169 | 0.612 |
| OLIGO_04811 | BF046378 | C10orf9   | -0.295 | 0.040 | 0.249  | 0.661 | 0.746  | 0.173 | 0.858  | 0.064 |
| OLIGO_04812 | BF046373 | TERF1     | -0.173 | 0.320 | 0.148  | 0.718 | -0.552 | 0.188 | -0.260 | 0.299 |
| OLIGO_04813 | BF046401 | CDC40     | -0.010 | 0.959 | 0.175  | 0.444 | 0.032  | 0.834 | 0.158  | 0.344 |
| OLIGO_04814 | BF046372 | BRP44     | -0.082 | 0.669 | 0.272  | 0.379 | 0.117  | 0.645 | 0.071  | 0.639 |
| OLIGO_04815 | BF046342 | BC050254  | -0.272 | 0.275 | 0.313  | 0.012 | 0.034  | 0.812 | -0.063 | 0.644 |
| OLIGO_04817 | BF046365 | ZFYVE20   | 0.035  | 0.890 | -0.354 | 0.139 | -0.007 | 0.972 | -0.547 | 0.082 |
| OLIGO_04818 | BF046398 | PCTK1     | -0.437 | 0.024 | -0.109 | 0.714 | -0.194 | 0.239 | 0.029  | 0.898 |
| OLIGO_04819 | BF046359 | IFI30     | 0.113  | 0.748 | -0.319 | 0.260 | 0.119  | 0.715 | 0.056  | 0.811 |
| OLIGO_04821 | BF046391 | C9orf90   | -0.224 | 0.397 | 0.279  | 0.530 | -0.278 | 0.342 | -0.315 | 0.073 |
| OLIGO_04822 | BF044402 | Syce2     | 0.094  | 0.750 | 0.349  | 0.356 | -0.663 | 0.327 | -0.371 | 0.331 |
| OLIGO_04823 | BF044401 | MAN2A2    | 0.013  | 0.929 | 0.027  | 0.905 | -0.039 | 0.865 | 0.024  | 0.881 |
| OLIGO_04825 | BF044382 | APXL2     | -0.032 | 0.951 | 0.251  | 0.266 | 0.177  | 0.387 | 0.193  | 0.449 |
| OLIGO_04826 | BF044372 | FAM49B    | 0.018  | 0.933 | 0.181  | 0.600 | 0.422  | 0.110 | -0.263 | 0.240 |
| OLIGO_04827 | BF044311 | ARL4C     | -0.053 | 0.773 | -0.179 | 0.579 | 0.020  | 0.911 | 0.331  | 0.112 |
| OLIGO_04828 | BF044376 | RAB5B     | 0.092  | 0.353 | 0.219  | 0.441 | 0.232  | 0.303 | 0.214  | 0.253 |
| OLIGO_04829 | BF044371 | SURB7     | -0.167 | 0.310 | -0.132 | 0.663 | -0.050 | 0.838 | -0.301 | 0.181 |
| OLIGO_04830 | BF044395 | EXT2      | 0.011  | 0.917 | 0.095  | 0.587 | 0.144  | 0.539 | -0.278 | 0.101 |
| OLIGO_04831 | BF044304 | PLSCR1    | -0.139 | 0.536 | 0.087  | 0.747 | 0.099  | 0.602 | 0.104  | 0.580 |
| OLIGO_04833 | BF042236 | ARFGEF1   | -0.083 | 0.721 | -0.033 | 0.921 | -0.015 | 0.953 | -0.321 | 0.073 |
| OLIGO_04836 | BF042122 | EFNA5     | 0.024  | 0.954 | -0.098 | 0.877 | 0.608  | 0.152 | -0.277 | 0.509 |
| OLIGO_04837 | BF042240 | SNX27     | 0.192  | 0.560 | 0.015  | 0.963 | 0.182  | 0.188 | 0.285  | 0.269 |
| OLIGO_04838 | BF042210 | TACC1     | -0.367 | 0.247 | 0.116  | 0.747 | 0.345  | 0.231 | 0.254  | 0.270 |

|             |          |           |        |       |        |       |        |       |        |       |
|-------------|----------|-----------|--------|-------|--------|-------|--------|-------|--------|-------|
| OLIGO_04839 | BF042209 | CIZ1      | -0.137 | 0.365 | -0.401 | 0.057 | 0.070  | 0.642 | -0.501 | 0.009 |
| OLIGO_04840 | BF042359 | PLAGL1    | -0.235 | 0.346 | -0.052 | 0.904 | -0.530 | 0.054 | -0.073 | 0.614 |
| OLIGO_04841 | BF042357 | FLJ90024  | -0.019 | 0.952 | -0.300 | 0.220 | -0.094 | 0.495 | -0.184 | 0.464 |
| OLIGO_04844 | BF042221 | ZNF664    | -0.223 | 0.450 | -0.016 | 0.960 | 0.000  | 0.999 | -0.436 | 0.019 |
| OLIGO_04846 | BF042217 | C7orf28A  | 0.268  | 0.176 | -0.360 | 0.164 | 0.222  | 0.317 | -0.754 | 0.004 |
| OLIGO_04848 | BF042552 | KIAA0157  | -0.377 | 0.270 | -0.415 | 0.173 | -0.195 | 0.567 | -0.093 | 0.606 |
| OLIGO_04849 | BF045808 | PANK2     | -0.226 | 0.312 | -0.108 | 0.612 | -0.151 | 0.338 | 0.130  | 0.491 |
| OLIGO_04851 | BF042384 | CHST6     | -0.329 | 0.311 | 0.143  | 0.649 | -0.098 | 0.760 | -0.002 | 0.994 |
| OLIGO_04853 | BF042544 | ALS2CR19  | -0.212 | 0.617 | -0.250 | 0.258 | 0.060  | 0.756 | -0.096 | 0.690 |
| OLIGO_04854 | BF042546 | KIAA0703  | -0.195 | 0.228 | -0.097 | 0.741 | 0.861  | 0.232 | 0.044  | 0.716 |
| OLIGO_04855 | BF042545 | HMGA1     | 0.237  | 0.341 | -0.106 | 0.766 | 0.401  | 0.199 | -0.440 | 0.019 |
| OLIGO_04856 | BF042535 | HPS3      | -0.186 | 0.562 | 0.015  | 0.974 | -0.476 | 0.120 | -0.600 | 0.004 |
| OLIGO_04857 | BF042537 | GTF2B     | 0.024  | 0.926 | 0.236  | 0.375 | 0.623  | 0.103 | -0.297 | 0.232 |
| OLIGO_04858 | BF042377 | SULT1C2   | -0.108 | 0.618 | -0.013 | 0.965 | 0.171  | 0.344 | 0.162  | 0.373 |
| OLIGO_04860 | BF040353 | RCOR1     | -0.039 | 0.825 | -0.241 | 0.297 | -0.216 | 0.417 | -0.250 | 0.178 |
| OLIGO_04861 | BF040351 | SGEF      | -0.383 | 0.100 | -0.149 | 0.556 | 0.227  | 0.263 | 0.219  | 0.244 |
| OLIGO_04863 | BF040310 | LSM14B    | 0.179  | 0.429 | 0.138  | 0.678 | 0.177  | 0.606 | -0.009 | 0.951 |
| OLIGO_04864 | BF040314 | GRPEL1    | 0.070  | 0.686 | 0.105  | 0.592 | -0.498 | 0.026 | -0.338 | 0.008 |
| OLIGO_04867 | BF040281 | RAP1B     | -0.346 | 0.473 | -0.213 | 0.525 | 0.135  | 0.555 | -0.471 | 0.170 |
| OLIGO_04869 | BF040347 | SNX24     | 0.153  | 0.715 | 0.142  | 0.792 | 0.434  | 0.446 | -0.076 | 0.839 |
| OLIGO_04870 | BF040300 | HMGB1     | 0.131  | 0.507 | -0.301 | 0.341 | -0.708 | 0.086 | -0.083 | 0.678 |
| OLIGO_04871 | BF040336 | SCRN1     | -0.195 | 0.392 | 0.075  | 0.873 | -0.139 | 0.687 | 0.332  | 0.108 |
| OLIGO_04872 | BF046202 | PLK2      | 0.325  | 0.202 | -0.428 | 0.216 | -0.838 | 0.184 | -0.071 | 0.799 |
| OLIGO_04876 | BF046181 | ZNF295    | 0.115  | 0.516 | 0.072  | 0.672 | -0.201 | 0.149 | -0.515 | 0.003 |
| OLIGO_04877 | BF046034 | SHB       | 0.332  | 0.221 | -0.029 | 0.956 | 1.027  | 0.060 | -0.348 | 0.418 |
| OLIGO_04878 | BF046176 | DNMT2     | -0.155 | 0.397 | 0.157  | 0.632 | -0.291 | 0.106 | -0.522 | 0.043 |
| OLIGO_04879 | BF046192 | HSD11B2   | 0.003  | 0.983 | 0.049  | 0.851 | 0.080  | 0.743 | -0.608 | 0.000 |
| OLIGO_04883 | BF046026 | KIAA1008  | 0.253  | 0.304 | -0.337 | 0.234 | 0.427  | 0.150 | 0.124  | 0.630 |
| OLIGO_04884 | BF046030 | FLJ34077  | -0.305 | 0.299 | -0.109 | 0.773 | 0.910  | 0.256 | -0.478 | 0.050 |
| OLIGO_04885 | BF043954 | HDAC7A    | 0.133  | 0.430 | 0.258  | 0.388 | 0.259  | 0.505 | -0.345 | 0.051 |
| OLIGO_04886 | BF043957 | CLDND1    | 0.076  | 0.635 | 0.152  | 0.652 | -0.069 | 0.862 | 0.019  | 0.934 |
| OLIGO_04887 | BF043962 | BCL2L13   | -0.243 | 0.455 | 0.144  | 0.645 | -0.028 | 0.910 | -0.401 | 0.002 |
| OLIGO_04890 | BF043948 | ETS1      | -0.019 | 0.950 | 0.976  | 0.054 | -0.465 | 0.314 | 0.341  | 0.081 |
| OLIGO_04891 | BF043938 | TSPAN17   | 0.370  | 0.444 | -0.223 | 0.693 | 0.564  | 0.162 | -0.591 | 0.260 |
| OLIGO_04892 | BF043942 | TAX1BP3   | -0.053 | 0.680 | 0.191  | 0.330 | 0.017  | 0.927 | 0.000  | 0.998 |
| OLIGO_04893 | BF043991 | C1orf172  | -0.002 | 0.992 | 0.173  | 0.609 | -0.223 | 0.181 | -0.383 | 0.009 |
| OLIGO_04895 | BF043966 | BAT3      | 0.270  | 0.075 | 0.485  | 0.256 | -0.139 | 0.494 | 0.069  | 0.707 |
| OLIGO_04897 | BF044131 | DUSP14    | 0.009  | 0.968 | 0.825  | 0.096 | 0.400  | 0.071 | 0.270  | 0.141 |
| OLIGO_04898 | BF044135 | SCYE1     | 0.135  | 0.408 | 0.558  | 0.297 | -0.147 | 0.419 | -0.299 | 0.272 |
| OLIGO_04899 | BF044151 | SHPRH     | 0.353  | 0.211 | 0.213  | 0.443 | -0.151 | 0.511 | -0.292 | 0.341 |
| OLIGO_04900 | BF044107 | METTL7B   | -0.748 | 0.286 | -0.559 | 0.342 | -0.508 | 0.185 | -0.138 | 0.781 |
| OLIGO_04901 | BF044110 | COQ4      | 0.125  | 0.528 | 0.568  | 0.142 | 0.128  | 0.625 | -0.378 | 0.061 |
| OLIGO_04902 | BF044105 | ZNF239    | -0.137 | 0.479 | 0.000  | 1.000 | -0.331 | 0.192 | -1.169 | 0.005 |
| OLIGO_04903 | BF044155 | UNQ338    | -0.159 | 0.382 | -0.110 | 0.820 | 0.551  | 0.152 | -0.108 | 0.580 |
| OLIGO_04905 | BF044145 | LOC517135 | 0.098  | 0.574 | -0.111 | 0.604 | -0.009 | 0.969 | -0.853 | 0.046 |
| OLIGO_04906 | BF044143 | RNF141    | 0.642  | 0.199 | -0.243 | 0.336 | -0.367 | 0.184 | -0.158 | 0.450 |
| OLIGO_04908 | BF042040 | KPNA1     | -0.089 | 0.659 | 0.501  | 0.282 | -0.264 | 0.288 | 0.207  | 0.311 |
| OLIGO_04910 | BF042017 | HBS1L     | 0.010  | 0.958 | 0.136  | 0.717 | 0.115  | 0.434 | 0.142  | 0.571 |
| OLIGO_04912 | BF042063 | ABCC6     | -0.151 | 0.197 | 0.201  | 0.705 | 0.621  | 0.140 | -0.139 | 0.533 |
| OLIGO_04913 | BF042011 | C10orf42  | 0.065  | 0.657 | 0.058  | 0.903 | -0.176 | 0.593 | -0.385 | 0.094 |
| OLIGO_04914 | BF042008 | FLJ12886  | -0.368 | 0.252 | 0.150  | 0.474 | 0.042  | 0.795 | -0.209 | 0.296 |
| OLIGO_04915 | BF042133 | FAM57A    | 0.083  | 0.590 | 0.064  | 0.745 | 0.067  | 0.654 | -0.274 | 0.019 |
| OLIGO_04916 | BF042031 | LOC653870 | -0.072 | 0.743 | -0.214 | 0.460 | -0.111 | 0.631 | -0.667 | 0.066 |
| OLIGO_04917 | BF042131 | RAC2      | -0.279 | 0.410 | 0.550  | 0.493 | 0.090  | 0.742 | -0.165 | 0.421 |
| OLIGO_04918 | BF042026 | CHCHD8    | 0.239  | 0.124 | 0.231  | 0.505 | -0.259 | 0.329 | -0.461 | 0.021 |
| OLIGO_04919 | BF042027 | WDFY3     | 0.107  | 0.529 | 0.005  | 0.976 | 0.331  | 0.048 | 0.617  | 0.028 |
| OLIGO_04920 | BF042144 | TBRG1     | 0.268  | 0.220 | 0.490  | 0.349 | 0.471  | 0.194 | 0.027  | 0.926 |
| OLIGO_04923 | BF040002 | CSF1R     | -0.005 | 0.986 | 0.285  | 0.332 | 0.255  | 0.380 | -0.119 | 0.614 |
| OLIGO_04924 | BF039978 | C7orf23   | 0.130  | 0.491 | 0.062  | 0.842 | -0.320 | 0.263 | -0.208 | 0.358 |
| OLIGO_04926 | BF039979 | HIST1H3D  | -0.510 | 0.095 | -0.134 | 0.695 | 0.081  | 0.687 | -1.210 | 0.000 |

|             |          |               |        |       |        |       |        |       |        |       |
|-------------|----------|---------------|--------|-------|--------|-------|--------|-------|--------|-------|
| OLIGO_04927 | BF039994 | HKDC1         | -0.028 | 0.838 | -0.109 | 0.520 | -0.077 | 0.500 | -0.268 | 0.240 |
| OLIGO_04929 | BF040134 | EDG1          | -0.036 | 0.843 | -0.017 | 0.962 | 0.283  | 0.506 | -0.928 | 0.000 |
| OLIGO_04931 | BF045543 | CAV1          | -0.204 | 0.560 | 0.132  | 0.835 | -0.543 | 0.175 | 0.394  | 0.069 |
| OLIGO_04932 | BF045708 | D15Wsu75e     | -0.348 | 0.067 | 0.431  | 0.045 | -0.071 | 0.684 | -0.094 | 0.458 |
| OLIGO_04933 | BF045710 | AARSD1        | 0.119  | 0.459 | 0.014  | 0.962 | -0.145 | 0.558 | -0.199 | 0.297 |
| OLIGO_04934 | BF043246 | ARL6IP4       | -0.690 | 0.001 | 0.078  | 0.657 | -0.031 | 0.870 | -0.793 | 0.007 |
| OLIGO_04935 | BF045701 | PKIG          | -0.388 | 0.511 | -0.228 | 0.340 | 0.195  | 0.211 | -0.237 | 0.275 |
| OLIGO_04936 | BF045674 | LOC614667     | -0.546 | 0.453 | -0.305 | 0.285 | 0.073  | 0.760 | -0.785 | 0.002 |
| OLIGO_04937 | BF045665 | LOC533526     | 0.344  | 0.273 | -0.139 | 0.675 | -0.290 | 0.284 | -0.285 | 0.242 |
| OLIGO_04939 | BF045691 | LTV1          | -0.047 | 0.812 | -0.099 | 0.682 | -0.392 | 0.084 | -0.229 | 0.236 |
| OLIGO_04940 | BF045680 | YIPF4         | 0.113  | 0.475 | 0.037  | 0.875 | 0.105  | 0.554 | 0.146  | 0.420 |
| OLIGO_04941 | BF045681 | SLC25A17      | -0.171 | 0.546 | -0.151 | 0.641 | 0.173  | 0.379 | -0.413 | 0.042 |
| OLIGO_04945 | BF045546 | LOC510780     | -0.117 | 0.322 | -0.211 | 0.487 | -0.146 | 0.546 | 0.117  | 0.568 |
| OLIGO_04948 | BF045865 | COL8A1        | -0.666 | 0.227 | -0.295 | 0.291 | 0.215  | 0.523 | -0.564 | 0.180 |
| OLIGO_04949 | BF045866 | EIF2C3        | -0.473 | 0.113 | -0.080 | 0.699 | -0.187 | 0.329 | -0.241 | 0.309 |
| OLIGO_04951 | BF045881 | VASH1         | -0.744 | 0.211 | -0.262 | 0.136 | -0.226 | 0.266 | -0.364 | 0.054 |
| OLIGO_04953 | BF045850 | LOC506408     | -0.640 | 0.147 | -0.140 | 0.757 | 0.065  | 0.844 | -0.315 | 0.166 |
| OLIGO_04954 | BF045843 | CRB3          | -0.174 | 0.152 | -0.126 | 0.551 | 0.106  | 0.578 | -0.395 | 0.038 |
| OLIGO_04956 | BF045873 | KIAA0701      | 0.013  | 0.954 | -0.166 | 0.790 | 1.163  | 0.035 | -0.474 | 0.309 |
| OLIGO_04957 | BF043805 | PCF11         | -0.053 | 0.803 | -0.219 | 0.477 | -0.261 | 0.086 | -0.213 | 0.350 |
| OLIGO_04959 | BF043796 | FLJ37440      | -0.153 | 0.448 | -0.121 | 0.408 | -0.331 | 0.062 | 0.011  | 0.953 |
| OLIGO_04960 | BF043640 | C18orf22      | -0.320 | 0.361 | -0.073 | 0.824 | -0.116 | 0.449 | -0.300 | 0.210 |
| OLIGO_04961 | BF043801 | C15orf23      | 0.049  | 0.733 | -0.122 | 0.473 | -0.508 | 0.095 | -0.587 | 0.006 |
| OLIGO_04962 | BF043803 | MCRS1         | 0.204  | 0.481 | -0.494 | 0.059 | -0.085 | 0.712 | 0.080  | 0.673 |
| OLIGO_04964 | BF043762 | KIAA1128      | -0.095 | 0.560 | 0.184  | 0.473 | 0.134  | 0.643 | -0.131 | 0.499 |
| OLIGO_04965 | BF043765 | DKFZP686M0199 | 0.009  | 0.957 | 0.235  | 0.430 | 0.388  | 0.305 | -0.554 | 0.007 |
| OLIGO_04966 | BF043775 | BPI           | 0.572  | 0.497 | 0.128  | 0.714 | 0.560  | 0.336 | 1.080  | 0.020 |
| OLIGO_04967 | BF041867 | HSPB7         | 0.623  | 0.206 | -0.203 | 0.689 | 0.825  | 0.020 | 0.008  | 0.961 |
| OLIGO_04968 | BF041881 | POLD4         | -0.021 | 0.920 | 0.014  | 0.954 | -0.436 | 0.183 | -0.096 | 0.563 |
| OLIGO_04969 | BF041876 | TMEM11        | -0.503 | 0.047 | 0.256  | 0.375 | -0.040 | 0.810 | 0.047  | 0.793 |
| OLIGO_04970 | BF041852 | PIP5K3        | 0.026  | 0.903 | -0.032 | 0.912 | -0.525 | 0.096 | -0.066 | 0.699 |
| OLIGO_04971 | BF041847 | SRCAP         | -0.004 | 0.984 | -0.212 | 0.293 | 0.240  | 0.256 | -0.087 | 0.597 |
| OLIGO_04972 | BF041705 | LOC651760     | 0.198  | 0.497 | 0.113  | 0.481 | -0.008 | 0.965 | -0.588 | 0.008 |
| OLIGO_04973 | BF041860 | MTHFD1L       | 0.409  | 0.173 | -0.645 | 0.048 | -0.607 | 0.298 | 0.197  | 0.372 |
| OLIGO_04974 | BF041861 | DKFZp586C0721 | 0.025  | 0.912 | -0.049 | 0.862 | -0.347 | 0.112 | 0.493  | 0.049 |
| OLIGO_04976 | BF041716 | IL21R         | 0.040  | 0.829 | 0.193  | 0.509 | -0.070 | 0.774 | -0.306 | 0.105 |
| OLIGO_04977 | BF041888 | TMEM85        | -0.067 | 0.694 | 0.130  | 0.549 | 0.081  | 0.769 | -0.459 | 0.014 |
| OLIGO_04978 | BF041889 | RAB11FIP5     | -0.275 | 0.225 | 0.034  | 0.920 | 0.404  | 0.060 | -0.446 | 0.008 |
| OLIGO_04980 | BF039661 | SRM           | -0.010 | 0.977 | -0.256 | 0.370 | -0.204 | 0.441 | -0.077 | 0.815 |
| OLIGO_04981 | BF039660 | DVL3          | -0.092 | 0.612 | -0.219 | 0.334 | 0.188  | 0.331 | -0.095 | 0.605 |
| OLIGO_04983 | BF039601 | PEX5          | 0.027  | 0.860 | 0.053  | 0.905 | 0.099  | 0.779 | -0.547 | 0.193 |
| OLIGO_04985 | BF039623 | LOC653532     | 0.286  | 0.472 | -0.206 | 0.522 | -0.276 | 0.175 | -0.304 | 0.166 |
| OLIGO_04986 | BF039637 | MAP2K6        | -0.007 | 0.982 | 0.633  | 0.194 | -0.276 | 0.537 | -0.041 | 0.907 |
| OLIGO_04987 | BF039639 | SCARB1        | -0.690 | 0.031 | -0.416 | 0.489 | 0.784  | 0.046 | -0.863 | 0.113 |
| OLIGO_04988 | BF039643 | TEAD1         | 0.053  | 0.747 | -0.186 | 0.574 | -0.545 | 0.050 | 0.082  | 0.744 |
| OLIGO_04989 | BF039900 | REEP5         | 0.057  | 0.786 | 0.012  | 0.977 | 0.191  | 0.592 | -0.362 | 0.134 |
| OLIGO_04990 | BF039867 | BRD9          | 0.184  | 0.317 | 0.755  | 0.156 | -0.751 | 0.021 | -0.360 | 0.265 |
| OLIGO_04991 | BF039871 | 2310008H09Rik | 0.229  | 0.139 | 0.519  | 0.170 | 0.081  | 0.627 | 0.367  | 0.100 |
| OLIGO_04992 | BF039961 | C14orf169     | 0.217  | 0.237 | 0.597  | 0.114 | 0.124  | 0.530 | -0.254 | 0.155 |
| OLIGO_04994 | BF039838 | KIAA0232      | -0.496 | 0.306 | 0.600  | 0.282 | -0.550 | 0.177 | 0.002  | 0.994 |
| OLIGO_04995 | BF039840 | Rps6kc1       | -0.271 | 0.281 | 0.166  | 0.655 | -0.037 | 0.882 | -0.797 | 0.046 |
| OLIGO_04996 | BF039883 | THEM4         | 0.268  | 0.305 | 0.221  | 0.482 | 0.467  | 0.098 | 0.496  | 0.113 |
| OLIGO_04999 | BF045351 | FBXO17        | -0.028 | 0.810 | -0.127 | 0.713 | -0.308 | 0.326 | -0.670 | 0.074 |
| OLIGO_05000 | BF045509 | MED28         | 0.017  | 0.932 | -0.440 | 0.157 | -0.717 | 0.065 | -0.383 | 0.121 |
| OLIGO_05002 | BF045373 | RBAK          | 0.693  | 0.289 | -0.211 | 0.368 | -0.537 | 0.111 | -0.800 | 0.067 |
| OLIGO_05004 | BF045528 | RPS6KB1       | -0.129 | 0.739 | 0.395  | 0.318 | -0.204 | 0.487 | 0.174  | 0.467 |
| OLIGO_05005 | BF045371 | L3MBTL2       | -0.454 | 0.029 | 0.384  | 0.165 | 0.344  | 0.173 | -0.135 | 0.461 |
| OLIGO_05007 | BF045362 | USP31         | -0.426 | 0.193 | 0.246  | 0.224 | 0.179  | 0.376 | 0.113  | 0.509 |
| OLIGO_05008 | BF045361 | FUK           | -0.215 | 0.737 | -0.152 | 0.723 | 0.142  | 0.350 | -0.612 | 0.047 |
| OLIGO_05011 | BF043439 | TPK1          | 0.053  | 0.821 | -0.074 | 0.881 | -0.564 | 0.283 | -0.243 | 0.400 |

|             |          |           |        |       |        |       |        |       |        |       |
|-------------|----------|-----------|--------|-------|--------|-------|--------|-------|--------|-------|
| OLIGO_05012 | BF043474 | C1orf27   | 0.018  | 0.956 | -0.466 | 0.208 | 0.082  | 0.809 | -0.092 | 0.642 |
| OLIGO_05013 | BF043448 | SFT2D1    | 0.042  | 0.898 | -0.303 | 0.359 | -0.348 | 0.144 | -0.645 | 0.011 |
| OLIGO_05014 | BF043447 | IDH3G     | 0.222  | 0.155 | 0.359  | 0.061 | 0.131  | 0.517 | -0.196 | 0.396 |
| OLIGO_05015 | BF043465 | AK1       | -0.477 | 0.021 | 0.274  | 0.275 | 0.119  | 0.498 | -0.575 | 0.081 |
| OLIGO_05017 | BF043437 | ZNF217    | -0.167 | 0.311 | 0.237  | 0.410 | 0.314  | 0.131 | 0.491  | 0.044 |
| OLIGO_05018 | BF043620 | HK2       | 0.033  | 0.905 | 0.275  | 0.291 | -0.157 | 0.667 | 0.265  | 0.264 |
| OLIGO_05019 | BF043478 | FLJ21816  | -0.417 | 0.010 | 0.286  | 0.381 | 0.339  | 0.105 | -0.522 | 0.066 |
| OLIGO_05020 | BF041343 | FGFR2     | -0.558 | 0.006 | 0.001  | 0.998 | -0.128 | 0.569 | -0.345 | 0.197 |
| OLIGO_05021 | BF041346 | FLJ12716  | -0.111 | 0.490 | -0.015 | 0.959 | -0.226 | 0.463 | -0.169 | 0.216 |
| OLIGO_05022 | BF041378 | RNUXA     | 0.201  | 0.283 | -0.241 | 0.448 | -0.317 | 0.070 | -0.834 | 0.009 |
| OLIGO_05023 | BF041387 | MST101    | 0.197  | 0.506 | -0.081 | 0.773 | -0.096 | 0.598 | -0.367 | 0.069 |
| OLIGO_05024 | BF041383 | 40243     | -0.047 | 0.778 | -0.018 | 0.928 | -0.102 | 0.615 | -0.363 | 0.014 |
| OLIGO_05025 | BF041358 | EIF4B     | -0.380 | 0.221 | -0.287 | 0.445 | 0.064  | 0.839 | -0.766 | 0.005 |
| OLIGO_05026 | BF041505 | SUPT16H   | -0.207 | 0.212 | 0.187  | 0.725 | -0.455 | 0.277 | -0.743 | 0.008 |
| OLIGO_05027 | BF041503 | LOC113179 | -0.361 | 0.022 | 0.208  | 0.757 | 0.654  | 0.190 | -0.156 | 0.691 |
| OLIGO_05028 | BF041336 | TRIM24    | -0.225 | 0.301 | -0.003 | 0.994 | -0.425 | 0.315 | -0.270 | 0.306 |
| OLIGO_05029 | BF041338 | C20orf7   | 0.118  | 0.594 | -0.095 | 0.805 | 0.044  | 0.810 | -0.306 | 0.376 |
| OLIGO_05030 | BF041340 | ME1       | -0.106 | 0.503 | 0.199  | 0.597 | -0.154 | 0.524 | -0.536 | 0.013 |
| OLIGO_05032 | BF041329 | CDK5RAP1  | 0.168  | 0.413 | 0.118  | 0.700 | 0.093  | 0.613 | -0.290 | 0.043 |
| OLIGO_05037 | BF041541 | WDR50     | -0.355 | 0.365 | -0.106 | 0.826 | -0.123 | 0.731 | -0.113 | 0.591 |
| OLIGO_05039 | BF041533 | SP1       | 0.017  | 0.922 | -0.297 | 0.226 | -0.043 | 0.812 | 0.115  | 0.300 |
| OLIGO_05042 | BF041675 | CASD1     | 0.045  | 0.899 | -0.154 | 0.625 | 0.581  | 0.146 | -0.104 | 0.650 |
| OLIGO_05043 | BF041536 | CLEC3B    | -0.580 | 0.084 | -0.115 | 0.639 | -0.029 | 0.921 | -0.408 | 0.180 |
| OLIGO_05044 | BF041683 | AP1G1     | -0.184 | 0.366 | -0.129 | 0.690 | -0.256 | 0.283 | 0.084  | 0.654 |
| OLIGO_05045 | BF041548 | USP52     | 0.081  | 0.627 | -0.226 | 0.374 | -0.155 | 0.362 | -0.582 | 0.003 |
| OLIGO_05046 | BF039460 | TRIP4     | 0.158  | 0.153 | 0.133  | 0.441 | 0.059  | 0.715 | -0.147 | 0.228 |
| OLIGO_05047 | BF039474 | ACVR2B    | -0.201 | 0.515 | -0.132 | 0.702 | -0.113 | 0.679 | -0.549 | 0.135 |
| OLIGO_05049 | BF039468 | RASL11A   | 2.146  | 0.003 | -0.086 | 0.668 | 0.537  | 0.138 | -0.184 | 0.385 |
| OLIGO_05050 | BF039470 | MCCC1     | -0.085 | 0.759 | -0.511 | 0.062 | 0.287  | 0.200 | 0.008  | 0.962 |
| OLIGO_05052 | BF039435 | PRKCG     | -0.161 | 0.308 | 0.380  | 0.373 | -0.043 | 0.842 | 0.405  | 0.185 |
| OLIGO_05053 | BF039440 | WDR71     | -0.040 | 0.733 | -0.114 | 0.659 | -0.341 | 0.271 | -0.370 | 0.043 |
| OLIGO_05054 | BF039493 | NY-SAR-48 | -0.051 | 0.748 | -0.406 | 0.140 | 0.005  | 0.980 | -0.422 | 0.042 |
| OLIGO_05056 | BF039443 | PLEKHH1   | -0.052 | 0.804 | 0.020  | 0.952 | 0.100  | 0.677 | -0.396 | 0.134 |
| OLIGO_05057 | BF039448 | Zkscan1   | 0.196  | 0.225 | -0.234 | 0.468 | 0.301  | 0.086 | 0.090  | 0.708 |
| OLIGO_05058 | BF039477 | PRO1580   | 0.000  | 0.999 | 0.229  | 0.446 | 0.107  | 0.459 | -0.354 | 0.019 |
| OLIGO_05059 | BF039310 | MAML2     | -0.376 | 0.165 | -0.110 | 0.723 | 0.043  | 0.764 | -0.104 | 0.648 |
| OLIGO_05060 | BF039311 | TFDP2     | -0.163 | 0.526 | 0.242  | 0.522 | 0.376  | 0.165 | -0.460 | 0.058 |
| OLIGO_05061 | BF039480 | LOC91431  | 0.429  | 0.048 | -0.750 | 0.047 | -0.209 | 0.313 | -0.574 | 0.037 |
| OLIGO_05062 | BF039483 | DSCAML1   | -0.154 | 0.531 | 0.140  | 0.630 | 0.049  | 0.774 | -0.532 | 0.082 |
| OLIGO_05063 | BF045230 | SLC35A2   | -0.028 | 0.840 | 0.531  | 0.051 | 0.150  | 0.335 | -0.007 | 0.968 |
| OLIGO_05064 | BF045204 | EP300     | -0.256 | 0.730 | -0.437 | 0.073 | -0.128 | 0.452 | -0.085 | 0.671 |
| OLIGO_05068 | BF045166 | MDM2      | 0.049  | 0.890 | -0.513 | 0.004 | -0.017 | 0.951 | -0.504 | 0.041 |
| OLIGO_05069 | BF045169 | AQR       | 0.076  | 0.601 | -0.011 | 0.961 | -0.400 | 0.032 | -0.369 | 0.038 |
| OLIGO_05071 | BF045161 | NDUFB7    | 0.078  | 0.685 | -0.214 | 0.401 | 0.298  | 0.218 | -0.529 | 0.021 |
| OLIGO_05073 | BF045177 | C2        | -0.893 | 0.338 | -0.189 | 0.538 | -0.561 | 0.170 | -0.107 | 0.688 |
| OLIGO_05075 | BF043052 | UBLCP1    | 0.034  | 0.879 | -0.609 | 0.086 | 0.534  | 0.167 | 0.306  | 0.261 |
| OLIGO_05077 | BF043217 | SPATA20   | -0.031 | 0.875 | 0.315  | 0.424 | 0.018  | 0.950 | -0.155 | 0.326 |
| OLIGO_05078 | BF043219 | RAB1A     | -0.895 | 0.115 | -0.242 | 0.532 | -0.452 | 0.273 | -0.083 | 0.689 |
| OLIGO_05079 | BF043056 | PTPN23    | -0.200 | 0.434 | 0.086  | 0.755 | 0.174  | 0.225 | -0.266 | 0.024 |
| OLIGO_05080 | BF043054 | ETF1      | 0.204  | 0.229 | -0.030 | 0.909 | 0.118  | 0.511 | -0.087 | 0.625 |
| OLIGO_05082 | BF043196 | MLL3      | -0.067 | 0.703 | -0.107 | 0.786 | 0.734  | 0.157 | 0.094  | 0.666 |
| OLIGO_05084 | BF043207 | TRMT1     | -0.041 | 0.866 | -0.218 | 0.483 | 0.251  | 0.350 | -0.167 | 0.560 |
| OLIGO_05086 | BF043208 | TSR1      | -0.112 | 0.556 | 0.613  | 0.132 | -0.178 | 0.305 | -0.095 | 0.627 |
| OLIGO_05089 | BF040233 | FAM20C    | -0.149 | 0.473 | 0.769  | 0.037 | 0.216  | 0.468 | 0.010  | 0.953 |
| OLIGO_05090 | BF040183 | CTAGE5    | 0.280  | 0.120 | 0.394  | 0.279 | -0.030 | 0.804 | -0.412 | 0.133 |
| OLIGO_05091 | BF039521 | ACTN1     | 0.067  | 0.778 | 0.224  | 0.302 | 0.417  | 0.141 | -0.362 | 0.148 |
| OLIGO_05093 | BF044851 | ALKBH6    | 0.081  | 0.534 | 0.107  | 0.657 | 0.013  | 0.953 | -0.058 | 0.659 |
| OLIGO_05115 | BF039365 | LOC614166 | 0.106  | 0.697 | -0.374 | 0.272 | 0.186  | 0.527 | -0.705 | 0.019 |
| OLIGO_05123 | BF041965 | LSS       | -0.227 | 0.423 | 0.096  | 0.764 | -0.305 | 0.366 | -0.919 | 0.002 |
| OLIGO_05124 | BF039593 | LOC509536 | -0.248 | 0.229 | 0.233  | 0.300 | 0.305  | 0.075 | 0.049  | 0.740 |

|             |               |               |        |       |        |       |        |       |        |       |
|-------------|---------------|---------------|--------|-------|--------|-------|--------|-------|--------|-------|
| OLIGO_05125 | BF045589      | LOC614612     | -0.113 | 0.412 | 0.262  | 0.638 | -0.351 | 0.554 | -0.382 | 0.240 |
| OLIGO_05126 | BF043931      | IGF2BP3       | -0.182 | 0.384 | -0.242 | 0.559 | -0.444 | 0.307 | -0.438 | 0.097 |
| OLIGO_05141 | BF440383      | GNPTAB        | 0.087  | 0.692 | -0.055 | 0.916 | -0.797 | 0.111 | -0.396 | 0.219 |
| OLIGO_05143 | BF440419      | SFRS12        | 0.052  | 0.800 | -0.120 | 0.793 | -0.067 | 0.807 | -0.279 | 0.174 |
| OLIGO_05144 | BF440385      | LOC641971     | 0.095  | 0.589 | 0.002  | 0.993 | -0.221 | 0.467 | -0.717 | 0.001 |
| OLIGO_05146 | BF440420      | KLF12         | -0.042 | 0.842 | 0.001  | 0.998 | -0.070 | 0.847 | 0.017  | 0.937 |
| OLIGO_05147 | BF440558      | UGCGL1        | -0.110 | 0.584 | 0.022  | 0.899 | 0.122  | 0.423 | 0.037  | 0.838 |
| OLIGO_05151 | BF440456      | BRD4          | -0.059 | 0.839 | -0.103 | 0.770 | -0.060 | 0.789 | -0.434 | 0.113 |
| OLIGO_05154 | BF440501      | FLJ36874      | -0.084 | 0.636 | 0.344  | 0.084 | -0.142 | 0.367 | -0.110 | 0.537 |
| OLIGO_05155 | BS29000110703 | RHOH          | -0.256 | 0.475 | 0.457  | 0.400 | -0.374 | 0.245 | -0.722 | 0.050 |
| OLIGO_05161 | BS29000113903 | SUPT4H1       | 0.113  | 0.382 | 0.070  | 0.807 | -0.098 | 0.626 | -0.194 | 0.264 |
| OLIGO_05165 | BS29000115903 | USP48         | 0.163  | 0.569 | -0.769 | 0.037 | -0.745 | 0.234 | -0.738 | 0.211 |
| OLIGO_05166 | BS29000116103 | HOP           | 0.093  | 0.609 | -0.028 | 0.897 | 0.179  | 0.589 | -0.297 | 0.174 |
| OLIGO_05171 | BS29000119803 | BoLA-DRB3     | -0.331 | 0.264 | 0.576  | 0.332 | -0.566 | 0.255 | 0.080  | 0.741 |
| OLIGO_05175 | BS29000122803 | PSTPIP2       | 0.227  | 0.494 | 0.169  | 0.690 | 0.319  | 0.364 | -0.588 | 0.052 |
| OLIGO_05176 | BS29000123803 | MCART1        | -0.207 | 0.261 | 0.546  | 0.165 | 0.434  | 0.043 | 0.354  | 0.059 |
| OLIGO_05177 | BS29000123903 | ANKRD44       | -0.131 | 0.550 | -0.143 | 0.740 | -0.268 | 0.452 | 0.027  | 0.929 |
| OLIGO_05182 | BS29000130603 | bcnt          | 0.125  | 0.588 | 0.371  | 0.436 | -0.214 | 0.408 | 0.332  | 0.150 |
| OLIGO_05183 | BS29000131603 | MGC128732     | -0.057 | 0.764 | 0.247  | 0.606 | -0.182 | 0.576 | -0.308 | 0.092 |
| OLIGO_05191 | BF440407      | CD96          | -0.609 | 0.275 | -0.305 | 0.679 | -0.027 | 0.947 | 0.231  | 0.682 |
| OLIGO_05192 | BF440445      | BRD4          | -0.237 | 0.481 | 0.002  | 0.996 | 0.259  | 0.487 | 0.072  | 0.793 |
| OLIGO_05193 | BF440485      | ZNFN1A4       | -0.262 | 0.227 | 0.268  | 0.339 | 0.063  | 0.760 | 0.482  | 0.133 |
| OLIGO_05196 | BF440466      | HEG1          | -0.530 | 0.103 | -0.345 | 0.269 | 0.176  | 0.516 | -0.472 | 0.078 |
| OLIGO_05198 | BF440393      | RFFL          | 0.025  | 0.857 | -0.200 | 0.555 | 0.110  | 0.707 | -1.273 | 0.000 |
| OLIGO_05199 | BF440411      | FLJ20032      | 0.050  | 0.752 | -0.301 | 0.378 | -0.058 | 0.786 | -0.029 | 0.901 |
| OLIGO_05201 | BF440526      | FLJ39739      | 0.055  | 0.762 | 0.252  | 0.630 | -0.372 | 0.274 | -0.492 | 0.313 |
| OLIGO_05203 | BF440468      | EGR2          | -0.111 | 0.784 | 0.201  | 0.589 | 0.135  | 0.580 | 0.040  | 0.863 |
| OLIGO_05207 | BF440434      | CMAH          | -0.284 | 0.066 | 0.507  | 0.234 | 0.008  | 0.974 | -0.118 | 0.487 |
| OLIGO_05214 | BF440403      | C20orf102     | 0.475  | 0.204 | -0.108 | 0.629 | 0.309  | 0.160 | -0.002 | 0.994 |
| OLIGO_05215 | BF440460      | LASS5         | -0.377 | 0.097 | -0.205 | 0.363 | -0.114 | 0.473 | -0.180 | 0.421 |
| OLIGO_05216 | BF440504      | PVRL1         | -0.155 | 0.443 | -0.093 | 0.587 | 0.341  | 0.151 | -0.803 | 0.000 |
| OLIGO_05220 | BF440505      | LOC507786     | -0.173 | 0.522 | 0.481  | 0.349 | -0.273 | 0.588 | -0.252 | 0.485 |
| OLIGO_05229 | BF440447      | NUBP1         | -0.390 | 0.120 | -0.266 | 0.378 | 0.439  | 0.095 | -0.232 | 0.401 |
| OLIGO_05232 | BF440513      | EXOC5         | -0.002 | 0.990 | -0.284 | 0.226 | -0.232 | 0.101 | 0.017  | 0.910 |
| OLIGO_05237 | BF440452      | ACTR6         | 0.006  | 0.972 | 0.031  | 0.921 | -0.330 | 0.310 | -0.484 | 0.084 |
| OLIGO_05238 | BF440494      | GPR137B       | -0.178 | 0.430 | 0.022  | 0.945 | -0.506 | 0.201 | -0.010 | 0.967 |
| OLIGO_05243 | BF440332      | FLJ30092      | 0.166  | 0.426 | -0.025 | 0.905 | 0.134  | 0.654 | -0.100 | 0.736 |
| OLIGO_05246 | BF440280      | ANXA3         | -0.097 | 0.700 | -0.221 | 0.454 | -0.503 | 0.190 | -0.207 | 0.193 |
| OLIGO_05247 | BF440308      | NUCB2         | 0.035  | 0.869 | -0.241 | 0.463 | 0.271  | 0.619 | -0.369 | 0.096 |
| OLIGO_05254 | BF440567      | MHCLA2        | -0.013 | 0.965 | -0.437 | 0.057 | -0.609 | 0.036 | 0.726  | 0.001 |
| OLIGO_05257 | BF440573      | LOC520186     | -0.088 | 0.713 | -0.064 | 0.869 | -0.548 | 0.167 | -0.152 | 0.515 |
| OLIGO_05259 | BF440576      | RPL5          | 0.232  | 0.372 | -0.571 | 0.327 | 0.178  | 0.769 | -0.595 | 0.121 |
| OLIGO_05260 | BF440173      | CR2           | -0.233 | 0.489 | -0.529 | 0.381 | 0.081  | 0.891 | 1.056  | 0.072 |
| OLIGO_05262 | BF440537      | ATF1          | -0.036 | 0.888 | -0.139 | 0.686 | -0.431 | 0.062 | -0.185 | 0.441 |
| OLIGO_05263 | BF440575      | FLJ20125      | 0.058  | 0.745 | 0.245  | 0.245 | -0.026 | 0.895 | -0.177 | 0.259 |
| OLIGO_05266 | BF440176      | STXBP3        | 0.030  | 0.896 | 0.148  | 0.632 | 0.427  | 0.351 | -0.290 | 0.158 |
| OLIGO_05267 | BF440345      | SEN8          | 0.041  | 0.768 | -0.130 | 0.674 | -0.431 | 0.281 | -0.464 | 0.115 |
| OLIGO_05268 | BF440586      | RASGRP1       | -0.167 | 0.410 | 0.159  | 0.805 | -0.761 | 0.292 | -0.743 | 0.039 |
| OLIGO_05269 | BF440536      | BCL11B        | 0.102  | 0.738 | -0.004 | 0.990 | -0.027 | 0.910 | -0.293 | 0.449 |
| OLIGO_05270 | BF440277      | UBD           | 0.333  | 0.287 | 0.314  | 0.518 | -0.186 | 0.623 | -0.377 | 0.306 |
| OLIGO_05272 | BF440307      | RAB11FIP2     | -0.010 | 0.977 | 0.687  | 0.044 | -0.091 | 0.581 | -0.146 | 0.354 |
| OLIGO_05273 | BF440333      | RNF14         | 0.156  | 0.497 | -0.075 | 0.764 | -0.110 | 0.634 | -0.180 | 0.378 |
| OLIGO_05275 | BF440335      | RAB8B         | 0.119  | 0.725 | -0.112 | 0.563 | -0.170 | 0.582 | -0.608 | 0.021 |
| OLIGO_05278 | BF440255      | IBRDC2        | -0.425 | 0.178 | 0.322  | 0.349 | -0.053 | 0.861 | 0.273  | 0.253 |
| OLIGO_05279 | BF440284      | RMND5A        | 0.162  | 0.401 | 0.323  | 0.290 | 0.039  | 0.841 | 0.289  | 0.167 |
| OLIGO_05283 | BF440340      | MRC1L1        | 0.334  | 0.530 | -0.463 | 0.404 | 0.224  | 0.661 | 0.272  | 0.506 |
| OLIGO_05284 | BF440367      | MGC134367     | 0.262  | 0.094 | 0.001  | 0.997 | 0.055  | 0.888 | 0.194  | 0.509 |
| OLIGO_05289 | BF440343      | MPHOSPH10     | 0.270  | 0.224 | 0.384  | 0.289 | -0.124 | 0.683 | -0.358 | 0.308 |
| OLIGO_05293 | BF440316      | NBEAL1        | -0.833 | 0.532 | -0.054 | 0.942 | -0.063 | 0.890 | -0.179 | 0.768 |
| OLIGO_05294 | BF440373      | 0610010K06Rik | -0.248 | 0.265 | 0.105  | 0.795 | 0.348  | 0.250 | 0.110  | 0.710 |

|             |          |           |        |       |        |       |        |       |        |       |
|-------------|----------|-----------|--------|-------|--------|-------|--------|-------|--------|-------|
| OLIGO_05296 | BF440317 | LOC530975 | 0.089  | 0.666 | 0.327  | 0.096 | 0.034  | 0.856 | 0.158  | 0.262 |
| OLIGO_05297 | BF440346 | KENAE     | -0.265 | 0.083 | -0.296 | 0.209 | -0.324 | 0.292 | -0.116 | 0.632 |
| OLIGO_05298 | BF440264 | ZDHHC2    | 0.092  | 0.748 | 0.162  | 0.701 | 0.166  | 0.611 | 0.284  | 0.217 |
| OLIGO_05299 | BF440593 | ENAM      | -0.141 | 0.684 | -0.021 | 0.958 | -0.143 | 0.670 | -1.028 | 0.002 |
| OLIGO_05301 | BF440349 | LOC652685 | -0.304 | 0.185 | 0.415  | 0.147 | -0.094 | 0.588 | -0.334 | 0.173 |
| OLIGO_05303 | BF440386 | Rg9mtd1   | 0.045  | 0.865 | 0.149  | 0.444 | 0.132  | 0.530 | -0.201 | 0.471 |
| OLIGO_05306 | BF440572 | RAB3GAP1  | -0.005 | 0.979 | 0.002  | 0.995 | 0.138  | 0.465 | -0.417 | 0.058 |
| OLIGO_05307 | BF440550 | LOC518495 | -0.065 | 0.778 | 0.299  | 0.343 | -0.530 | 0.359 | 0.234  | 0.253 |
| OLIGO_05309 | BF440353 | LOC616789 | -0.014 | 0.937 | -0.226 | 0.459 | -0.443 | 0.144 | -0.079 | 0.727 |
| OLIGO_05310 | BF440325 | TNFRSF1B  | -0.067 | 0.647 | 0.328  | 0.321 | -0.299 | 0.331 | 0.172  | 0.338 |
| OLIGO_05311 | BF440271 | CHAC2     | -0.225 | 0.680 | 0.294  | 0.421 | 0.085  | 0.793 | -0.401 | 0.301 |
| OLIGO_05312 | BF440184 | MED28     | -0.384 | 0.274 | 0.171  | 0.627 | 0.262  | 0.544 | -0.317 | 0.209 |
| OLIGO_05313 | BF440272 | RGS5      | -0.272 | 0.323 | -0.052 | 0.888 | -0.727 | 0.082 | 0.072  | 0.803 |
| OLIGO_05314 | BF440356 | LCP2      | -0.314 | 0.271 | 0.380  | 0.263 | -0.502 | 0.454 | 0.616  | 0.026 |
| OLIGO_05317 | BF440347 | FGD3      | -0.193 | 0.545 | 0.245  | 0.280 | -0.003 | 0.990 | -0.450 | 0.060 |
| OLIGO_05319 | BF440319 | ZBTB25    | -0.162 | 0.481 | 0.463  | 0.347 | -0.223 | 0.697 | -0.600 | 0.020 |
| OLIGO_05323 | BF440375 | PAPD4     | -0.002 | 0.995 | -0.265 | 0.418 | 0.305  | 0.375 | -0.626 | 0.036 |
| OLIGO_05325 | BF440242 | FMR1      | 0.014  | 0.958 | 0.090  | 0.771 | 0.042  | 0.854 | 0.675  | 0.031 |
| OLIGO_05328 | BF440270 | PON2      | -0.033 | 0.869 | -0.529 | 0.222 | 0.449  | 0.181 | -0.571 | 0.018 |
| OLIGO_05329 | BF440378 | NCF2      | -0.397 | 0.147 | 0.371  | 0.533 | -0.495 | 0.165 | -0.711 | 0.008 |
| OLIGO_05331 | BF440328 | NME1      | 0.110  | 0.580 | -0.250 | 0.412 | -0.130 | 0.475 | 0.091  | 0.546 |
| OLIGO_05333 | BF440329 | TMEM129   | -0.046 | 0.788 | 0.019  | 0.931 | 0.049  | 0.739 | -0.255 | 0.005 |
| OLIGO_05356 | AW464307 | ATG12     | -0.014 | 0.914 | 0.458  | 0.294 | -0.146 | 0.478 | -0.153 | 0.393 |
| OLIGO_05360 | AW464308 | AP2M1     | -0.312 | 0.458 | 0.341  | 0.415 | -0.625 | 0.355 | 0.747  | 0.063 |
| OLIGO_05367 | BM364411 | DMAP1     | 0.656  | 0.169 | -0.151 | 0.536 | -0.004 | 0.982 | -0.466 | 0.017 |
| OLIGO_05370 | BM364482 | NNT       | -0.089 | 0.769 | -0.184 | 0.630 | -0.527 | 0.278 | -0.607 | 0.023 |
| OLIGO_05374 | BM364537 | CEACAM4   | -0.429 | 0.056 | 0.557  | 0.066 | 0.041  | 0.859 | -0.557 | 0.062 |
| OLIGO_05375 | BM364565 | C12orf35  | -0.108 | 0.835 | 0.101  | 0.843 | 0.688  | 0.077 | 0.482  | 0.222 |
| OLIGO_05376 | BM364578 | CCL21     | 0.385  | 0.645 | 0.053  | 0.889 | 0.115  | 0.467 | -0.021 | 0.928 |
| OLIGO_05377 | BM364598 | FAM18B2   | 0.166  | 0.469 | 0.200  | 0.408 | -0.083 | 0.426 | 0.327  | 0.047 |
| OLIGO_05378 | BM364614 | KAZALD1   | -0.598 | 0.228 | -0.177 | 0.466 | -0.019 | 0.939 | -0.300 | 0.260 |
| OLIGO_05379 | BM364617 | GTPBP1    | -0.040 | 0.838 | 0.823  | 0.041 | 0.328  | 0.116 | -0.029 | 0.932 |
| OLIGO_05386 | BM364762 | DNAJB2    | -0.188 | 0.592 | 0.785  | 0.131 | 0.206  | 0.583 | 0.101  | 0.671 |
| OLIGO_05387 | BM364769 | TUBD1     | -0.204 | 0.425 | 0.442  | 0.293 | -0.527 | 0.100 | -0.170 | 0.328 |
| OLIGO_05388 | BM364822 | LOC645568 | 0.079  | 0.792 | 0.340  | 0.186 | 0.135  | 0.528 | 0.088  | 0.584 |
| OLIGO_05389 | BM364858 | ZNF12     | 1.029  | 0.157 | -0.278 | 0.407 | -0.189 | 0.367 | -0.556 | 0.071 |
| OLIGO_05390 | BM364825 | KIRREL3   | 0.344  | 0.413 | 0.005  | 0.989 | -0.166 | 0.463 | -0.190 | 0.422 |
| OLIGO_05391 | BM364871 | FGL2      | 1.020  | 0.165 | 0.064  | 0.928 | -0.247 | 0.522 | 0.377  | 0.281 |
| OLIGO_05395 | BM364902 | C13orf10  | -0.223 | 0.415 | -0.233 | 0.367 | -0.274 | 0.171 | -0.534 | 0.009 |
| OLIGO_05397 | BM364905 | ITGB5     | -0.574 | 0.054 | -0.083 | 0.753 | 0.373  | 0.246 | 0.446  | 0.034 |
| OLIGO_05398 | BM364912 | CLEC2D    | -0.162 | 0.521 | 0.645  | 0.269 | 0.684  | 0.044 | -0.243 | 0.426 |
| OLIGO_05400 | BM364950 | ETV6      | -0.071 | 0.615 | -0.059 | 0.760 | -0.024 | 0.915 | -0.145 | 0.331 |
| OLIGO_05402 | BM364954 | CCL4L1    | -0.148 | 0.426 | 0.090  | 0.773 | -0.114 | 0.572 | -0.730 | 0.006 |
| OLIGO_05405 | BM364981 | PFDN5     | 0.021  | 0.935 | -0.158 | 0.717 | 0.064  | 0.874 | -0.441 | 0.055 |
| OLIGO_05406 | BM364995 | MGC128856 | 0.731  | 0.218 | -0.391 | 0.158 | -0.166 | 0.402 | -0.386 | 0.112 |
| OLIGO_05407 | BM365043 | LOC652614 | 1.088  | 0.315 | -0.128 | 0.726 | 0.298  | 0.306 | -0.067 | 0.814 |
| OLIGO_05408 | BM365025 | SAMHD1    | 0.004  | 0.989 | -0.091 | 0.860 | -0.568 | 0.186 | -0.540 | 0.076 |
| OLIGO_05409 | BM365054 | BAZ2B     | -0.452 | 0.195 | 0.259  | 0.610 | 0.414  | 0.299 | -0.125 | 0.793 |
| OLIGO_05410 | BM365100 | PITPNM1   | -0.086 | 0.575 | 0.413  | 0.227 | 0.412  | 0.313 | -0.086 | 0.729 |
| OLIGO_05414 | BM365149 | FAM76B    | -0.343 | 0.196 | -0.030 | 0.944 | 0.347  | 0.190 | -0.015 | 0.923 |
| OLIGO_05417 | BM365200 | WDFY2     | -0.159 | 0.585 | -0.127 | 0.665 | 0.562  | 0.193 | -0.056 | 0.822 |
| OLIGO_05418 | BM365203 | RPS6KA1   | -0.256 | 0.250 | 0.079  | 0.729 | 0.031  | 0.935 | -0.133 | 0.461 |
| OLIGO_05420 | BM365273 | RNF31     | 0.177  | 0.299 | 0.093  | 0.665 | -0.536 | 0.030 | -0.152 | 0.467 |
| OLIGO_05422 | BM365292 | HIST1H2AG | -0.072 | 0.866 | -0.802 | 0.075 | -0.108 | 0.701 | -0.512 | 0.155 |
| OLIGO_05423 | BM365296 | PDE5A     | 0.185  | 0.721 | -0.402 | 0.097 | -0.060 | 0.549 | 0.458  | 0.045 |
| OLIGO_05424 | BM365348 | CD2       | 0.288  | 0.362 | -0.191 | 0.495 | -0.393 | 0.427 | -0.966 | 0.020 |
| OLIGO_05427 | BM365371 | C10orf54  | -0.069 | 0.808 | 0.080  | 0.668 | 0.008  | 0.963 | 0.174  | 0.270 |
| OLIGO_05431 | BM365409 | MYO1G     | -0.094 | 0.878 | 0.032  | 0.920 | -0.092 | 0.747 | -0.706 | 0.019 |
| OLIGO_05433 | BM365570 | LYL1      | 0.243  | 0.511 | 0.125  | 0.658 | 0.157  | 0.474 | 0.103  | 0.616 |
| OLIGO_05434 | BM365799 | COX5B     | 0.015  | 0.952 | -0.070 | 0.711 | 0.193  | 0.298 | 0.055  | 0.704 |

|             |          |               |        |       |        |       |        |       |        |       |
|-------------|----------|---------------|--------|-------|--------|-------|--------|-------|--------|-------|
| OLIGO_05437 | BM365877 | LOC615620     | -0.720 | 0.071 | 0.128  | 0.726 | -0.535 | 0.271 | 0.021  | 0.932 |
| OLIGO_05438 | BM365938 | SESN2         | -0.128 | 0.635 | 0.112  | 0.751 | 0.094  | 0.684 | -0.231 | 0.343 |
| OLIGO_05439 | BM365941 | LOC533757     | 0.494  | 0.360 | -0.449 | 0.273 | -0.002 | 0.990 | -0.183 | 0.459 |
| OLIGO_05440 | BM366953 | URP2          | -0.024 | 0.902 | -0.034 | 0.842 | 0.061  | 0.757 | -0.446 | 0.059 |
| OLIGO_05442 | BM365993 | TLR2          | 0.263  | 0.668 | -0.322 | 0.105 | -0.181 | 0.724 | -0.237 | 0.348 |
| OLIGO_05443 | BM365981 | TRA@          | -0.421 | 0.508 | 0.058  | 0.829 | 0.078  | 0.851 | -0.214 | 0.470 |
| OLIGO_05445 | BM366011 | IL27RA        | 0.281  | 0.256 | -0.267 | 0.340 | -0.417 | 0.341 | -0.560 | 0.018 |
| OLIGO_05448 | BM366103 | NAPA          | -0.110 | 0.767 | -0.105 | 0.795 | -0.502 | 0.158 | -0.013 | 0.950 |
| OLIGO_05450 | BM366123 | LOC374395     | 0.227  | 0.318 | 0.247  | 0.447 | 0.493  | 0.142 | 0.495  | 0.146 |
| OLIGO_05453 | BM366223 | LOC507905     | -0.687 | 0.047 | 0.107  | 0.725 | 0.427  | 0.407 | 0.094  | 0.752 |
| OLIGO_05455 | BM366235 | ICAM3         | 0.146  | 0.739 | 0.524  | 0.133 | 0.078  | 0.813 | 0.089  | 0.823 |
| OLIGO_05458 | BM366281 | EPM2AIP1      | -0.281 | 0.337 | -0.203 | 0.497 | 0.049  | 0.775 | -0.107 | 0.592 |
| OLIGO_05459 | BM366249 | FYN           | -0.938 | 0.022 | 0.092  | 0.757 | -0.326 | 0.149 | -0.292 | 0.269 |
| OLIGO_05460 | BM366252 | TIAF1         | -0.124 | 0.465 | 0.213  | 0.694 | 0.321  | 0.304 | 0.422  | 0.144 |
| OLIGO_05464 | BM366313 | DHX38         | 0.156  | 0.417 | 0.061  | 0.903 | 0.325  | 0.356 | -0.069 | 0.785 |
| OLIGO_05466 | BM366349 | GPR88         | 0.006  | 0.984 | 0.053  | 0.900 | -0.230 | 0.486 | -1.016 | 0.014 |
| OLIGO_05468 | BM366436 | GNLY          | 0.092  | 0.769 | 0.408  | 0.314 | 0.041  | 0.889 | -0.098 | 0.733 |
| OLIGO_05470 | BM366451 | PPFIBP1       | -0.457 | 0.110 | 0.261  | 0.366 | -0.054 | 0.742 | 0.052  | 0.764 |
| OLIGO_05471 | BM366469 | RPL5          | 0.007  | 0.988 | 0.549  | 0.194 | 0.093  | 0.454 | -0.084 | 0.699 |
| OLIGO_05473 | BM366488 | MYADM         | -0.064 | 0.768 | -0.280 | 0.532 | -0.464 | 0.099 | 0.041  | 0.809 |
| OLIGO_05474 | BM366528 | ITSN2         | -0.394 | 0.094 | 0.849  | 0.030 | -0.165 | 0.395 | -0.045 | 0.811 |
| OLIGO_05476 | BM366536 | IRF1          | 0.014  | 0.925 | -0.019 | 0.953 | -0.108 | 0.607 | -0.324 | 0.118 |
| OLIGO_05477 | BM366578 | MAD2L2        | 0.254  | 0.138 | 0.178  | 0.534 | -0.193 | 0.423 | -0.246 | 0.077 |
| OLIGO_05478 | BM366593 | DNAJA3        | -0.105 | 0.553 | -0.378 | 0.193 | -0.370 | 0.222 | -0.715 | 0.001 |
| OLIGO_05479 | BM366600 | APBB1IP       | -0.143 | 0.726 | -0.079 | 0.850 | -0.676 | 0.063 | -0.781 | 0.037 |
| OLIGO_05483 | BM366612 | PIAS4         | 0.443  | 0.163 | 0.326  | 0.397 | 0.153  | 0.429 | -0.257 | 0.589 |
| OLIGO_05487 | BM366796 | WHDC1         | 0.271  | 0.088 | 0.267  | 0.412 | -0.183 | 0.610 | 0.033  | 0.892 |
| OLIGO_05492 | BM366880 | TRERF1        | -0.351 | 0.187 | -0.098 | 0.840 | 0.146  | 0.621 | -0.024 | 0.941 |
| OLIGO_05493 | BM366888 | CCR1          | -0.285 | 0.159 | 0.138  | 0.752 | -0.013 | 0.964 | 0.573  | 0.031 |
| OLIGO_05500 | BM363888 | RASSF1        | -0.252 | 0.201 | 0.149  | 0.676 | 0.105  | 0.716 | -0.209 | 0.393 |
| OLIGO_05501 | BM363902 | ZAP70         | 0.061  | 0.850 | -0.265 | 0.329 | -0.120 | 0.654 | -0.038 | 0.806 |
| OLIGO_05504 | BM363938 | HRB2          | -0.574 | 0.026 | 0.023  | 0.939 | -0.014 | 0.939 | -0.076 | 0.704 |
| OLIGO_05506 | BM363966 | VPS39         | -0.376 | 0.209 | 0.169  | 0.728 | -0.031 | 0.911 | -0.178 | 0.470 |
| OLIGO_05507 | BM363968 | CCL3L1        | -0.173 | 0.110 | 0.381  | 0.098 | -0.041 | 0.872 | -0.448 | 0.030 |
| OLIGO_05508 | BM363977 | TBC1D9        | -0.389 | 0.322 | 0.078  | 0.635 | -0.211 | 0.069 | -0.526 | 0.020 |
| OLIGO_05511 | BM364010 | ASPSCR1       | -0.064 | 0.743 | 0.484  | 0.398 | 0.425  | 0.312 | -0.103 | 0.728 |
| OLIGO_05512 | BM364011 | TM7SF3        | 0.007  | 0.960 | 0.063  | 0.792 | -0.612 | 0.049 | -0.661 | 0.000 |
| OLIGO_05515 | BM364034 | LOC525040     | 0.021  | 0.909 | 0.079  | 0.865 | 0.479  | 0.188 | 0.309  | 0.290 |
| OLIGO_05516 | BM364040 | CCDC65        | -0.215 | 0.399 | -0.193 | 0.693 | -0.297 | 0.550 | -0.231 | 0.520 |
| OLIGO_05518 | BM364056 | CD99L2        | 0.007  | 0.956 | -0.142 | 0.710 | 0.358  | 0.290 | 0.051  | 0.849 |
| OLIGO_05522 | BM361838 | RPGR          | -0.204 | 0.232 | -0.054 | 0.887 | -0.078 | 0.866 | -0.378 | 0.212 |
| OLIGO_05523 | BM361845 | TLR4          | -0.084 | 0.763 | 0.075  | 0.883 | -0.577 | 0.233 | 0.228  | 0.182 |
| OLIGO_05525 | BM361824 | CARD11        | 0.025  | 0.928 | -0.135 | 0.564 | -0.231 | 0.340 | -0.490 | 0.046 |
| OLIGO_05531 | BM361983 | CD3EAP        | 0.136  | 0.366 | -0.142 | 0.403 | 0.118  | 0.424 | -0.415 | 0.066 |
| OLIGO_05532 | BM362012 | 9130221J17Rik | -0.071 | 0.706 | -0.023 | 0.882 | -0.290 | 0.153 | -0.159 | 0.204 |
| OLIGO_05534 | BM362019 | SETX          | -0.419 | 0.109 | 0.103  | 0.739 | 0.102  | 0.637 | -0.325 | 0.092 |
| OLIGO_05536 | BM362040 | RFX5          | 0.405  | 0.174 | -0.063 | 0.917 | 0.425  | 0.435 | 0.291  | 0.370 |
| OLIGO_05539 | BM362069 | CREG1         | 0.421  | 0.050 | -0.235 | 0.348 | 0.106  | 0.773 | -0.251 | 0.332 |
| OLIGO_05540 | BM362074 | TRAF3IP3      | 0.037  | 0.929 | -0.029 | 0.963 | -0.798 | 0.469 | -0.428 | 0.410 |
| OLIGO_05542 | BM362113 | XYLT1         | 0.260  | 0.630 | -0.102 | 0.719 | -0.835 | 0.221 | -1.422 | 0.001 |
| OLIGO_05543 | BM362155 | ABHD14A       | -0.023 | 0.914 | -0.121 | 0.748 | -0.044 | 0.893 | -0.165 | 0.467 |
| OLIGO_05545 | BM362186 | ITGA2B        | 0.592  | 0.062 | 0.183  | 0.721 | 0.153  | 0.612 | -0.054 | 0.725 |
| OLIGO_05546 | BM362197 | CYBB          | -0.578 | 0.219 | -0.530 | 0.132 | -0.303 | 0.518 | 0.703  | 0.004 |
| OLIGO_05550 | BM362209 | LOC642083     | -0.666 | 0.158 | -0.286 | 0.478 | 0.355  | 0.451 | -0.224 | 0.542 |
| OLIGO_05552 | BM362212 | STXBP2        | -0.160 | 0.675 | -0.286 | 0.278 | -0.104 | 0.563 | -0.109 | 0.579 |
| OLIGO_05554 | BM362283 | KLHDC5        | -0.764 | 0.017 | 0.282  | 0.497 | 0.056  | 0.820 | -0.025 | 0.916 |
| OLIGO_05555 | BM362285 | P2RX5         | -0.002 | 0.992 | 0.004  | 0.990 | -0.567 | 0.076 | -0.283 | 0.113 |
| OLIGO_05557 | BM362375 | LOC339483     | -0.111 | 0.432 | -0.310 | 0.253 | -0.047 | 0.766 | 0.183  | 0.559 |
| OLIGO_05558 | BM362422 | MRPS22        | 0.136  | 0.466 | -0.082 | 0.762 | -0.173 | 0.363 | -0.596 | 0.014 |
| OLIGO_05559 | BM362397 | DMN           | -0.122 | 0.577 | 1.394  | 0.031 | -0.549 | 0.442 | 0.195  | 0.552 |

|             |          |           |        |       |        |       |        |       |        |       |
|-------------|----------|-----------|--------|-------|--------|-------|--------|-------|--------|-------|
| OLIGO_05560 | BM362403 | CXCR6     | -0.522 | 0.414 | -0.573 | 0.248 | 0.054  | 0.919 | 0.853  | 0.094 |
| OLIGO_05563 | BM362452 | CXCL9     | -0.935 | 0.567 | 0.449  | 0.296 | 0.321  | 0.443 | 0.317  | 0.386 |
| OLIGO_05565 | BM362465 | UQCR      | -0.098 | 0.646 | 0.263  | 0.452 | 0.380  | 0.111 | 0.089  | 0.625 |
| OLIGO_05567 | BM362480 | MDP-1     | -0.008 | 0.972 | 0.267  | 0.142 | -0.036 | 0.874 | -0.081 | 0.615 |
| OLIGO_05569 | BM362494 | GBF1      | -0.172 | 0.127 | -0.310 | 0.435 | -0.224 | 0.484 | -0.391 | 0.186 |
| OLIGO_05571 | BM362502 | CEECAM1   | -0.071 | 0.749 | -0.090 | 0.883 | 0.479  | 0.494 | -0.327 | 0.446 |
| OLIGO_05576 | BM362570 | ZNF622    | 0.017  | 0.909 | 0.659  | 0.080 | 0.068  | 0.690 | 0.156  | 0.326 |
| OLIGO_05577 | BM362578 | DGCR6L    | 0.013  | 0.974 | 0.382  | 0.155 | 0.025  | 0.839 | -0.040 | 0.843 |
| OLIGO_05578 | BM362608 | LOC90826  | 0.001  | 0.994 | 0.390  | 0.324 | -0.180 | 0.487 | -0.439 | 0.143 |
| OLIGO_05580 | BM362665 | ENPP2     | -0.268 | 0.346 | 0.513  | 0.069 | -0.583 | 0.128 | 0.206  | 0.412 |
| OLIGO_05582 | BM362713 | FLJ90013  | -0.072 | 0.748 | -0.375 | 0.229 | -0.417 | 0.180 | -0.409 | 0.055 |
| OLIGO_05584 | BM362733 | PTPRE     | -0.467 | 0.105 | -0.404 | 0.134 | 0.066  | 0.821 | -0.279 | 0.317 |
| OLIGO_05585 | BM362739 | MOBP      | -0.040 | 0.839 | -0.323 | 0.141 | -0.386 | 0.218 | -0.586 | 0.141 |
| OLIGO_05586 | BM362743 | SAA1      | -0.047 | 0.868 | -0.012 | 0.974 | -0.206 | 0.551 | -0.963 | 0.012 |
| OLIGO_05587 | BM362765 | MLL5      | -0.698 | 0.016 | -0.178 | 0.520 | -0.134 | 0.599 | 0.410  | 0.038 |
| OLIGO_05588 | BM362809 | CP        | -0.766 | 0.019 | -0.113 | 0.787 | -0.893 | 0.005 | 0.359  | 0.191 |
| OLIGO_05589 | BM362811 | ProSAPiP1 | -0.092 | 0.477 | 0.301  | 0.309 | -0.028 | 0.902 | -0.338 | 0.018 |
| OLIGO_05591 | BM362051 | MKKS      | -0.042 | 0.699 | -0.029 | 0.940 | -0.206 | 0.416 | -0.214 | 0.189 |
| OLIGO_05593 | BM362838 | SMAP1L    | -0.227 | 0.315 | 0.157  | 0.677 | -0.167 | 0.367 | -0.138 | 0.395 |
| OLIGO_05597 | BM362861 | TMEM55B   | 0.072  | 0.593 | 0.096  | 0.598 | -0.357 | 0.038 | -0.332 | 0.014 |
| OLIGO_05601 | BM362911 | C10orf54  | -0.202 | 0.129 | 0.480  | 0.015 | 0.097  | 0.389 | -0.090 | 0.396 |
| OLIGO_05603 | BM362963 | C1orf37   | -0.026 | 0.943 | 0.194  | 0.482 | 0.296  | 0.210 | 0.101  | 0.467 |
| OLIGO_05606 | BM363013 | SRBD1     | -0.394 | 0.076 | 0.024  | 0.907 | -0.727 | 0.057 | -0.236 | 0.335 |
| OLIGO_05613 | BF040321 | PPT2      | 0.020  | 0.930 | -0.069 | 0.719 | 0.078  | 0.563 | 0.545  | 0.000 |
| OLIGO_05624 | AW463521 | OAS1      | -0.667 | 0.465 | -0.191 | 0.385 | -0.242 | 0.312 | 0.793  | 0.012 |
| OLIGO_05628 | BF040259 | CDK2AP2   | -0.129 | 0.318 | -0.032 | 0.948 | 0.506  | 0.236 | -0.278 | 0.288 |
| OLIGO_05641 | AW462357 | ALDOC     | -0.015 | 0.944 | 0.657  | 0.232 | -0.377 | 0.110 | -0.678 | 0.018 |
| OLIGO_05719 | AW462010 | ANKRA2    | -0.100 | 0.446 | -0.156 | 0.648 | 0.121  | 0.649 | -0.464 | 0.089 |
| OLIGO_05722 | AW464652 | PAK2      | -0.057 | 0.763 | 0.272  | 0.432 | 0.130  | 0.701 | 0.012  | 0.950 |
| OLIGO_05891 | AW461349 | ARPC5L    | 0.015  | 0.942 | 0.156  | 0.620 | -0.336 | 0.302 | -0.073 | 0.604 |
| OLIGO_05893 | AW461453 | POLR3A    | -0.096 | 0.552 | 0.183  | 0.380 | 0.302  | 0.164 | -0.409 | 0.100 |
| OLIGO_05894 | AW464846 | ZNF198    | 0.272  | 0.071 | -0.666 | 0.043 | -0.349 | 0.220 | 0.227  | 0.245 |
| OLIGO_05895 | AW465009 | C12orf10  | -0.097 | 0.439 | -0.095 | 0.781 | 0.115  | 0.658 | -0.632 | 0.058 |
| OLIGO_05896 | AW464866 | LTA4H     | 0.087  | 0.639 | 0.339  | 0.285 | 0.042  | 0.859 | 0.131  | 0.519 |
| OLIGO_05897 | AW465024 | PRMT5     | -0.065 | 0.646 | 0.169  | 0.766 | -0.580 | 0.278 | -0.636 | 0.062 |
| OLIGO_05898 | AW465035 | EGLN3     | -0.773 | 0.242 | 0.010  | 0.966 | 0.027  | 0.907 | 0.345  | 0.097 |
| OLIGO_05899 | AW465043 | PPP5C     | -0.045 | 0.884 | -0.271 | 0.151 | 0.037  | 0.778 | -0.076 | 0.649 |
| OLIGO_05900 | AW464907 | RAB14     | 0.036  | 0.881 | -0.474 | 0.046 | -0.023 | 0.904 | 0.466  | 0.018 |
| OLIGO_05901 | AW464938 | ENTPD4    | -0.444 | 0.138 | -0.198 | 0.476 | -0.134 | 0.491 | 0.389  | 0.097 |
| OLIGO_05902 | AW464972 | ITGA6     | 0.072  | 0.804 | -0.078 | 0.873 | 0.076  | 0.813 | 0.007  | 0.975 |
| OLIGO_05904 | AW464992 | CLTA      | 0.154  | 0.240 | -0.009 | 0.964 | 0.249  | 0.335 | -0.270 | 0.052 |
| OLIGO_05905 | AW465025 | CEACAM19  | -0.432 | 0.391 | 0.040  | 0.878 | 0.305  | 0.215 | -0.250 | 0.340 |
| OLIGO_05910 | AW463831 | LOC532327 | -0.085 | 0.607 | 0.045  | 0.866 | 0.039  | 0.826 | -0.392 | 0.026 |
| OLIGO_05914 | AW463942 | PHYHD1    | -0.847 | 0.008 | -0.069 | 0.833 | -0.367 | 0.266 | -0.289 | 0.121 |
| OLIGO_05915 | AW464108 | GGTLA1    | -0.328 | 0.205 | -0.294 | 0.442 | 0.209  | 0.462 | 0.258  | 0.208 |
| OLIGO_05917 | AW464128 | VDP       | -0.371 | 0.128 | 0.059  | 0.796 | -0.021 | 0.926 | -0.445 | 0.002 |
| OLIGO_05918 | AW463852 | GIT1      | 0.210  | 0.329 | 0.187  | 0.326 | -0.029 | 0.889 | -0.191 | 0.126 |
| OLIGO_05919 | AW464016 | SAPS1     | 0.054  | 0.702 | 0.127  | 0.633 | 0.006  | 0.955 | -0.311 | 0.022 |
| OLIGO_05920 | AW464027 | CENPB     | -0.147 | 0.472 | 0.337  | 0.282 | -0.001 | 0.996 | -0.339 | 0.033 |
| OLIGO_05925 | AW463938 | RPS19BP1  | 0.232  | 0.198 | -0.391 | 0.186 | -0.124 | 0.494 | -0.230 | 0.248 |
| OLIGO_05926 | AW464100 | TMEM41B   | 0.085  | 0.557 | 0.063  | 0.807 | -0.482 | 0.051 | -0.064 | 0.728 |
| OLIGO_05927 | AW463862 | ROGDI     | 0.057  | 0.790 | -0.229 | 0.256 | -0.057 | 0.765 | -0.310 | 0.045 |
| OLIGO_05931 | AW461544 | ASMTL     | -0.340 | 0.143 | -0.612 | 0.120 | 0.012  | 0.961 | -0.410 | 0.069 |
| OLIGO_05936 | AW463946 | FGD4      | 0.132  | 0.652 | 0.001  | 0.998 | -0.301 | 0.241 | 0.204  | 0.401 |
| OLIGO_05937 | AW464133 | HAT1      | 0.189  | 0.335 | -0.410 | 0.156 | 0.025  | 0.916 | -1.046 | 0.003 |
| OLIGO_05938 | AW464019 | NUDT19    | 0.080  | 0.832 | 0.175  | 0.735 | 0.052  | 0.924 | 0.384  | 0.429 |
| OLIGO_05941 | AW464009 | MED28     | 0.058  | 0.624 | 0.391  | 0.229 | -0.129 | 0.544 | -0.416 | 0.012 |
| OLIGO_05943 | AW463885 | SERPINB9  | -0.139 | 0.476 | 0.313  | 0.367 | 0.353  | 0.554 | -0.413 | 0.083 |
| OLIGO_05944 | AW464031 | LPIN3     | -0.128 | 0.636 | -0.473 | 0.133 | -0.074 | 0.657 | -0.637 | 0.106 |
| OLIGO_05945 | AW461479 | RNF111    | 0.062  | 0.757 | -0.109 | 0.610 | -0.168 | 0.419 | -0.231 | 0.180 |



|             |          |           |        |       |        |       |        |       |        |       |
|-------------|----------|-----------|--------|-------|--------|-------|--------|-------|--------|-------|
| OLIGO_05946 | AW464062 | MRPL45    | 0.216  | 0.356 | 0.452  | 0.038 | -0.193 | 0.372 | 0.289  | 0.222 |
| OLIGO_05947 | AW464135 | CYCS      | -0.007 | 0.974 | 0.513  | 0.183 | -0.230 | 0.362 | 0.091  | 0.637 |
| OLIGO_05948 | AW464001 | PARD3     | -0.086 | 0.692 | 0.500  | 0.053 | -0.178 | 0.504 | -0.045 | 0.871 |
| OLIGO_05950 | AW463918 | GRN       | -0.334 | 0.255 | 0.253  | 0.325 | 0.440  | 0.133 | 0.127  | 0.362 |
| OLIGO_05951 | AW461392 | AMT       | 0.131  | 0.501 | 0.173  | 0.336 | -0.317 | 0.081 | -0.144 | 0.529 |
| OLIGO_05952 | AW464080 | PER2      | 0.029  | 0.881 | 0.218  | 0.282 | -0.035 | 0.844 | -0.140 | 0.255 |
| OLIGO_05953 | AW463947 | OSTF1     | 0.078  | 0.714 | 0.096  | 0.836 | 0.389  | 0.146 | 0.043  | 0.852 |
| OLIGO_05954 | AW463974 | HHAT      | -0.151 | 0.237 | 0.146  | 0.492 | -0.025 | 0.877 | -0.202 | 0.241 |
| OLIGO_05955 | AW464125 | DENND1A   | -0.386 | 0.439 | -0.405 | 0.249 | -0.233 | 0.317 | -0.248 | 0.387 |
| OLIGO_05956 | AW464002 | MRPL22    | 0.149  | 0.568 | -0.273 | 0.339 | -0.344 | 0.168 | -0.336 | 0.099 |
| OLIGO_05957 | AW461599 | USP21     | -0.288 | 0.244 | -0.345 | 0.349 | 0.396  | 0.162 | -0.167 | 0.522 |
| OLIGO_05958 | AW464052 | PPP1R12A  | -0.203 | 0.452 | -0.395 | 0.222 | -0.553 | 0.036 | -0.124 | 0.552 |
| OLIGO_05960 | AW463948 | STAMBP    | 0.110  | 0.428 | 0.366  | 0.089 | 0.045  | 0.779 | -0.350 | 0.040 |
| OLIGO_05961 | AW464116 | LENG1     | -0.128 | 0.605 | 0.357  | 0.358 | 0.389  | 0.242 | -0.173 | 0.517 |
| OLIGO_05962 | AW463986 | LOC222699 | -0.040 | 0.774 | 0.529  | 0.199 | -0.266 | 0.277 | -0.182 | 0.334 |
| OLIGO_05964 | AW463876 | RNF122    | -0.101 | 0.262 | 0.155  | 0.511 | 0.028  | 0.858 | -0.148 | 0.297 |
| OLIGO_05965 | AW463888 | FARS2     | -0.211 | 0.474 | -0.241 | 0.157 | -0.067 | 0.610 | -0.002 | 0.984 |
| OLIGO_05969 | AW463987 | FIBP      | -0.171 | 0.475 | -0.290 | 0.219 | 0.114  | 0.619 | -0.621 | 0.001 |
| OLIGO_05970 | AW463849 | RBM22     | 0.177  | 0.246 | 0.101  | 0.691 | -0.064 | 0.767 | -0.240 | 0.231 |
| OLIGO_05973 | AW464013 | LOC162427 | 0.105  | 0.503 | -0.188 | 0.561 | 0.554  | 0.018 | 0.377  | 0.081 |
| OLIGO_05974 | AW464035 | COMMD4    | -0.148 | 0.344 | -0.001 | 0.997 | 0.170  | 0.549 | -0.202 | 0.426 |
| OLIGO_05976 | AW461652 | SMPDL3B   | 0.453  | 0.252 | -0.312 | 0.472 | -0.515 | 0.239 | -0.426 | 0.156 |
| OLIGO_05978 | AW464015 | DHDDS     | -0.256 | 0.254 | 0.115  | 0.652 | 0.117  | 0.589 | -0.050 | 0.722 |
| OLIGO_05982 | AW464154 | PDIA3     | -0.289 | 0.099 | -0.368 | 0.403 | 0.427  | 0.388 | -0.185 | 0.512 |
| OLIGO_05983 | AW464222 | MGC13017  | -0.087 | 0.683 | -0.369 | 0.255 | -0.277 | 0.389 | -0.247 | 0.263 |
| OLIGO_05985 | AW464234 | BMP7      | -0.544 | 0.073 | -0.225 | 0.257 | 0.406  | 0.267 | 0.065  | 0.700 |
| OLIGO_05986 | AW464301 | TMEM138   | -0.030 | 0.875 | 0.107  | 0.383 | 0.017  | 0.869 | -0.194 | 0.079 |
| OLIGO_05987 | AW464246 | LOC389895 | -0.107 | 0.796 | 0.165  | 0.696 | 0.192  | 0.458 | 0.043  | 0.800 |
| OLIGO_05989 | AW461524 | OAT       | -0.126 | 0.474 | 0.240  | 0.640 | 0.267  | 0.467 | 0.287  | 0.303 |
| OLIGO_05991 | AW464433 | GLT6D1    | -0.288 | 0.468 | 0.134  | 0.577 | 0.418  | 0.348 | -0.126 | 0.606 |
| OLIGO_05992 | AW464457 | TMEM14A   | -0.079 | 0.625 | 0.036  | 0.850 | 0.032  | 0.841 | -0.181 | 0.213 |
| OLIGO_05993 | AW464303 | LOC654335 | 0.198  | 0.565 | 0.203  | 0.554 | 0.001  | 0.997 | -0.141 | 0.423 |
| OLIGO_05996 | AW464413 | CCDC47    | 0.082  | 0.694 | -0.250 | 0.344 | 0.068  | 0.710 | 0.134  | 0.429 |
| OLIGO_05997 | AW461455 | C9orf156  | -0.002 | 0.990 | -0.127 | 0.606 | -0.218 | 0.187 | -0.134 | 0.455 |
| OLIGO_06001 | AW461433 | UBQLN1    | -0.037 | 0.829 | -0.270 | 0.184 | -0.027 | 0.891 | 0.577  | 0.026 |
| OLIGO_06002 | AW461566 | NET1      | 0.033  | 0.809 | -0.137 | 0.674 | 0.717  | 0.214 | 0.179  | 0.461 |
| OLIGO_06003 | AW464194 | PAN3      | -0.033 | 0.798 | 0.009  | 0.976 | -0.392 | 0.095 | 0.290  | 0.187 |
| OLIGO_06004 | AW464370 | PPP1R9B   | -0.042 | 0.808 | 0.182  | 0.457 | -0.057 | 0.793 | -0.076 | 0.567 |
| OLIGO_06005 | AW464447 | HMGCL     | -0.215 | 0.706 | -0.025 | 0.923 | -0.015 | 0.946 | -0.608 | 0.002 |
| OLIGO_06010 | AW464491 | UPF2      | -0.035 | 0.857 | -0.144 | 0.637 | -0.185 | 0.513 | -0.241 | 0.239 |
| OLIGO_06011 | AW464349 | GDI2      | 0.021  | 0.878 | -0.068 | 0.853 | 0.340  | 0.350 | 0.019  | 0.923 |
| OLIGO_06013 | AW464359 | AAK1      | -0.219 | 0.252 | -0.200 | 0.580 | -0.134 | 0.679 | -0.397 | 0.069 |
| OLIGO_06014 | AW464195 | FSTL3     | 0.400  | 0.227 | 0.149  | 0.742 | -0.531 | 0.406 | -0.091 | 0.618 |
| OLIGO_06015 | AW464206 | MOBK1A    | -0.220 | 0.257 | 0.411  | 0.139 | -0.226 | 0.500 | -0.207 | 0.307 |
| OLIGO_06017 | AW461578 | PDZK1     | -0.034 | 0.818 | -0.174 | 0.823 | 0.347  | 0.459 | -0.026 | 0.912 |
| OLIGO_06019 | AW464415 | BRRN1     | 0.376  | 0.009 | -0.577 | 0.008 | -0.041 | 0.881 | -0.448 | 0.051 |
| OLIGO_06021 | AW464436 | FNTA      | -0.050 | 0.804 | -0.578 | 0.038 | -0.156 | 0.450 | 0.398  | 0.111 |
| OLIGO_06022 | AW464448 | COX7A2L   | 0.124  | 0.506 | -0.204 | 0.403 | -0.120 | 0.585 | -0.433 | 0.032 |
| OLIGO_06024 | AW464149 | FNBP1L    | 0.129  | 0.554 | 0.134  | 0.774 | 0.170  | 0.573 | -0.690 | 0.001 |
| OLIGO_06025 | AW464161 | COPS4     | 0.652  | 0.006 | -0.846 | 0.023 | 0.360  | 0.250 | -0.176 | 0.529 |
| OLIGO_06026 | AW464404 | PFDN6     | 0.153  | 0.263 | -0.036 | 0.873 | 0.076  | 0.650 | -0.346 | 0.035 |
| OLIGO_06029 | AW464449 | RAB37     | -0.069 | 0.855 | 0.300  | 0.331 | 0.315  | 0.201 | -0.694 | 0.001 |
| OLIGO_06030 | AW464306 | DRB1      | 0.078  | 0.655 | 0.335  | 0.265 | 0.156  | 0.437 | -0.421 | 0.071 |
| OLIGO_06033 | AW464878 | SLC26A2   | 0.518  | 0.245 | -0.091 | 0.747 | 0.370  | 0.313 | 0.415  | 0.078 |
| OLIGO_06035 | AW464909 | BUD31     | 0.223  | 0.203 | 0.439  | 0.205 | -0.457 | 0.069 | -0.791 | 0.001 |
| OLIGO_06036 | AW464919 | EMR3      | 0.842  | 0.184 | -0.015 | 0.953 | 0.147  | 0.774 | -0.569 | 0.220 |
| OLIGO_06039 | AW465516 | FCGR3B    | -0.089 | 0.721 | 0.293  | 0.571 | 0.333  | 0.527 | -0.061 | 0.801 |
| OLIGO_06040 | AW464986 | C1orf198  | 0.179  | 0.260 | 0.002  | 0.996 | 0.103  | 0.800 | 0.062  | 0.751 |
| OLIGO_06042 | AW464930 | Etv3      | -0.014 | 0.978 | 0.642  | 0.167 | -0.239 | 0.493 | 0.274  | 0.218 |
| OLIGO_06043 | AW464941 | PIAS1     | 0.162  | 0.433 | 0.647  | 0.104 | -0.087 | 0.706 | 0.242  | 0.290 |

|             |          |           |        |       |        |       |        |       |        |       |
|-------------|----------|-----------|--------|-------|--------|-------|--------|-------|--------|-------|
| OLIGO_06044 | AW464952 | ARID5A    | -0.640 | 0.008 | 0.509  | 0.021 | -0.088 | 0.737 | -0.323 | 0.215 |
| OLIGO_06045 | AW465104 | CTBP1     | 0.195  | 0.431 | 0.749  | 0.091 | 0.487  | 0.108 | -0.627 | 0.094 |
| OLIGO_06046 | AW464995 | SMARCA5   | -0.086 | 0.660 | 0.499  | 0.346 | -0.100 | 0.575 | 0.172  | 0.633 |
| OLIGO_06047 | AW464839 | FLJ34077  | -0.318 | 0.334 | -0.070 | 0.897 | -0.429 | 0.304 | 0.172  | 0.659 |
| OLIGO_06048 | AW465006 | TFAP2C    | 0.098  | 0.843 | 0.016  | 0.961 | 0.555  | 0.363 | -0.092 | 0.695 |
| OLIGO_06050 | AW465029 | CPNE1     | -0.287 | 0.330 | 0.155  | 0.834 | 0.279  | 0.538 | 0.452  | 0.400 |
| OLIGO_06052 | AW465089 | TNFAIP8   | -0.485 | 0.266 | -0.023 | 0.943 | -0.341 | 0.064 | -0.116 | 0.437 |
| OLIGO_06053 | AW465115 | MYCBP     | 0.215  | 0.353 | -0.341 | 0.177 | -0.161 | 0.603 | -0.414 | 0.027 |
| OLIGO_06056 | AW465030 | GRAMD3    | -0.021 | 0.952 | 0.237  | 0.594 | 0.081  | 0.863 | 0.451  | 0.079 |
| OLIGO_06058 | AW464880 | RFP       | -0.008 | 0.959 | 0.322  | 0.268 | -0.372 | 0.185 | -0.096 | 0.651 |
| OLIGO_06059 | AW464903 | SLCO2B1   | -0.228 | 0.114 | 0.006  | 0.980 | 0.079  | 0.730 | -0.191 | 0.371 |
| OLIGO_06060 | AW465090 | SGCE      | 0.017  | 0.946 | -0.484 | 0.236 | -0.415 | 0.174 | -0.045 | 0.845 |
| OLIGO_06061 | AW464967 | AHCYL1    | 0.047  | 0.667 | -0.026 | 0.934 | 0.020  | 0.935 | 0.065  | 0.737 |
| OLIGO_06063 | AW465008 | PRMT1     | -0.137 | 0.197 | -0.229 | 0.371 | -0.551 | 0.050 | -0.480 | 0.005 |
| OLIGO_06064 | AW465031 | RPS6KA3   | -0.200 | 0.290 | -0.301 | 0.426 | -0.148 | 0.457 | -0.255 | 0.176 |
| OLIGO_06065 | AW464881 | PHF5A     | -0.060 | 0.827 | -0.557 | 0.150 | -0.248 | 0.320 | -0.517 | 0.010 |
| OLIGO_06066 | AW464914 | TMCC3     | 0.108  | 0.548 | 0.396  | 0.082 | -0.004 | 0.977 | 0.187  | 0.513 |
| OLIGO_06067 | AW461644 | SERINC3   | -0.132 | 0.643 | 0.126  | 0.631 | -0.299 | 0.393 | 0.450  | 0.017 |
| OLIGO_06068 | AW465141 | AP2S1     | 0.243  | 0.281 | 0.148  | 0.515 | 0.285  | 0.012 | 0.074  | 0.639 |
| OLIGO_06070 | AW465257 | ANAPC5    | -0.028 | 0.832 | 0.100  | 0.777 | -0.090 | 0.696 | -0.242 | 0.244 |
| OLIGO_06071 | AW465262 | ZNF651    | 0.003  | 0.989 | 0.347  | 0.371 | 0.109  | 0.759 | -0.154 | 0.598 |
| OLIGO_06074 | AW465212 | GSR       | 0.162  | 0.526 | -0.027 | 0.919 | 0.675  | 0.050 | -1.045 | 0.007 |
| OLIGO_06075 | AW465308 | PQBP1     | 0.079  | 0.867 | -0.448 | 0.153 | 0.069  | 0.737 | -0.559 | 0.035 |
| OLIGO_06078 | AW465238 | PLEKHK1   | -0.339 | 0.500 | -0.212 | 0.485 | 0.641  | 0.305 | -0.536 | 0.095 |
| OLIGO_06079 | AW465355 | GLB1      | -0.179 | 0.477 | 0.240  | 0.372 | 0.293  | 0.083 | 0.067  | 0.605 |
| OLIGO_06081 | AW465277 | NVL       | 0.069  | 0.723 | -0.105 | 0.776 | -0.143 | 0.512 | -0.268 | 0.163 |
| OLIGO_06084 | AW465328 | B4GALT3   | 0.040  | 0.885 | -0.042 | 0.887 | -0.166 | 0.666 | 0.043  | 0.833 |
| OLIGO_06085 | AW465351 | DCTN6     | 0.141  | 0.375 | -0.278 | 0.325 | -0.266 | 0.217 | -0.446 | 0.021 |
| OLIGO_06087 | AW465166 | CEBPG     | -0.021 | 0.898 | -0.046 | 0.914 | 0.022  | 0.934 | -0.453 | 0.021 |
| OLIGO_06088 | AW465181 | TMPRSS4   | 0.029  | 0.925 | -0.170 | 0.386 | 0.093  | 0.597 | -0.099 | 0.591 |
| OLIGO_06089 | AW465287 | SH3GLB1   | -0.061 | 0.758 | -0.011 | 0.976 | -0.033 | 0.891 | -0.283 | 0.205 |
| OLIGO_06090 | AW465294 | SLC17A7   | -0.458 | 0.235 | 0.334  | 0.130 | -0.204 | 0.492 | 0.121  | 0.355 |
| OLIGO_06092 | AW465225 | GSTZ1     | -0.636 | 0.012 | -0.208 | 0.541 | -0.062 | 0.776 | 0.030  | 0.872 |
| OLIGO_06093 | AW465345 | WDR18     | -0.097 | 0.727 | 0.102  | 0.621 | -0.296 | 0.217 | -0.245 | 0.349 |
| OLIGO_06094 | AW465272 | BXDC2     | 0.085  | 0.646 | -0.171 | 0.534 | -0.124 | 0.570 | -0.024 | 0.879 |
| OLIGO_06096 | AW465190 | MPST      | -0.140 | 0.215 | -0.028 | 0.874 | -0.115 | 0.485 | -0.353 | 0.083 |
| OLIGO_06097 | AW465280 | KLHL20    | 0.178  | 0.331 | -0.068 | 0.730 | -0.082 | 0.672 | -0.010 | 0.959 |
| OLIGO_06098 | AW465210 | JOSD3     | -0.235 | 0.225 | -0.188 | 0.651 | 0.349  | 0.298 | -0.090 | 0.710 |
| OLIGO_06099 | AW465133 | LOC51136  | -0.069 | 0.689 | -0.031 | 0.906 | -0.015 | 0.944 | 0.010  | 0.955 |
| OLIGO_06100 | AW461456 | LOC538544 | 0.082  | 0.506 | -0.071 | 0.811 | -0.440 | 0.048 | -0.377 | 0.023 |
| OLIGO_06101 | AW465435 | FLJ22709  | -0.146 | 0.260 | -0.286 | 0.385 | 0.618  | 0.131 | -0.219 | 0.118 |
| OLIGO_06104 | AW465370 | PNPT1     | 0.119  | 0.517 | -0.382 | 0.220 | -0.382 | 0.036 | -0.105 | 0.543 |
| OLIGO_06105 | AW465454 | SFN       | -0.149 | 0.400 | 0.008  | 0.979 | 0.372  | 0.375 | -0.084 | 0.722 |
| OLIGO_06106 | AW465416 | RASSF6    | -0.215 | 0.361 | 0.370  | 0.551 | -0.230 | 0.667 | -0.085 | 0.791 |
| OLIGO_06107 | AW465485 | COQ5      | 0.125  | 0.343 | -0.026 | 0.903 | 0.125  | 0.546 | -0.390 | 0.108 |
| OLIGO_06108 | AW461461 | PLS1      | -0.248 | 0.533 | -0.162 | 0.740 | 0.295  | 0.458 | 0.350  | 0.185 |
| OLIGO_06109 | AW465545 | PLEKHA8   | -0.300 | 0.155 | 0.022  | 0.939 | -0.306 | 0.319 | 0.356  | 0.329 |
| OLIGO_06110 | AW465565 | PWP1      | 0.210  | 0.402 | -0.219 | 0.544 | 0.404  | 0.398 | 0.087  | 0.624 |
| OLIGO_06112 | AW465590 | AAMP      | 0.103  | 0.652 | 0.074  | 0.761 | 0.130  | 0.378 | -0.022 | 0.858 |
| OLIGO_06113 | AW465478 | FARSLA    | -0.504 | 0.078 | -0.093 | 0.800 | 0.290  | 0.080 | -0.109 | 0.489 |
| OLIGO_06114 | AW461469 | SERPING1  | -0.022 | 0.925 | -0.113 | 0.715 | -0.145 | 0.362 | 0.154  | 0.398 |
| OLIGO_06116 | AW465591 | CDK2      | 0.066  | 0.597 | -0.367 | 0.129 | -0.344 | 0.139 | 0.098  | 0.588 |
| OLIGO_06118 | AW465627 | TARBP1    | 0.201  | 0.390 | 0.115  | 0.484 | 0.124  | 0.485 | -0.168 | 0.349 |
| OLIGO_06120 | AW461591 | HSF1      | -0.136 | 0.474 | 0.204  | 0.201 | 0.255  | 0.170 | -0.324 | 0.040 |
| OLIGO_06121 | AW465522 | C18orf30  | -0.067 | 0.866 | -0.048 | 0.829 | -0.107 | 0.617 | -0.019 | 0.907 |
| OLIGO_06122 | AW465603 | C2orf32   | -0.006 | 0.980 | -0.061 | 0.794 | 0.111  | 0.450 | -0.460 | 0.004 |
| OLIGO_06123 | AW465583 | CCNDBP1   | 0.013  | 0.950 | 0.132  | 0.428 | -0.055 | 0.668 | -0.215 | 0.095 |
| OLIGO_06126 | AW465500 | VEGFB     | -0.075 | 0.720 | 0.178  | 0.470 | 0.271  | 0.148 | -0.350 | 0.014 |
| OLIGO_06127 | AW465450 | C1orf133  | -0.036 | 0.776 | 0.038  | 0.925 | -0.165 | 0.653 | 0.008  | 0.977 |
| OLIGO_06130 | AW465567 | BCAP31    | -0.307 | 0.110 | -0.104 | 0.756 | 0.288  | 0.245 | -0.149 | 0.450 |

|             |          |           |        |       |        |       |        |       |        |       |
|-------------|----------|-----------|--------|-------|--------|-------|--------|-------|--------|-------|
| OLIGO_06132 | AW461355 | THRAP6    | 0.053  | 0.743 | 0.025  | 0.929 | -0.650 | 0.002 | -0.466 | 0.009 |
| OLIGO_06133 | AW461601 | NDUFA8    | 0.036  | 0.824 | 0.176  | 0.381 | -0.051 | 0.826 | -0.700 | 0.001 |
| OLIGO_06135 | AW465550 | CTSE      | -0.047 | 0.932 | -0.310 | 0.562 | 2.570  | 0.069 | -0.650 | 0.125 |
| OLIGO_06136 | AW465382 | HPSE      | -0.438 | 0.206 | -0.410 | 0.532 | 0.626  | 0.472 | -0.531 | 0.112 |
| OLIGO_06137 | AW465405 | RBM15     | 0.117  | 0.743 | -0.297 | 0.283 | 0.031  | 0.926 | -0.615 | 0.001 |
| OLIGO_06138 | AW465514 | COPE      | 0.237  | 0.111 | 0.694  | 0.106 | 0.086  | 0.703 | 0.038  | 0.854 |
| OLIGO_06139 | BF046524 | PRDM4     | 0.121  | 0.382 | 0.450  | 0.085 | -0.083 | 0.684 | 0.262  | 0.283 |
| OLIGO_06140 | AW465754 | EIF4B     | 0.138  | 0.424 | 0.686  | 0.115 | -0.098 | 0.706 | -0.088 | 0.651 |
| OLIGO_06141 | AW461498 | PLA2G7    | 0.034  | 0.878 | 0.858  | 0.036 | 0.297  | 0.272 | 0.169  | 0.462 |
| OLIGO_06142 | AW465764 | MARK4     | 0.098  | 0.814 | -0.053 | 0.940 | 0.683  | 0.279 | -0.318 | 0.574 |
| OLIGO_06143 | AW465669 | MBD4      | 0.335  | 0.403 | 0.291  | 0.439 | -0.141 | 0.586 | -0.241 | 0.507 |
| OLIGO_06144 | AW465691 | LOC158563 | 0.556  | 0.105 | -0.177 | 0.742 | 0.759  | 0.239 | 0.260  | 0.480 |
| OLIGO_06146 | AW461625 | B3GAT3    | -0.031 | 0.860 | 0.167  | 0.436 | 0.097  | 0.632 | -0.317 | 0.054 |
| OLIGO_06147 | AW465712 | SEC61A1   | 0.101  | 0.523 | -0.025 | 0.943 | 0.186  | 0.492 | -0.049 | 0.816 |
| OLIGO_06149 | AW465674 | BLCAP     | 0.080  | 0.721 | -0.183 | 0.313 | -0.151 | 0.550 | -0.022 | 0.898 |
| OLIGO_06150 | AW465795 | PFDN1     | 0.090  | 0.741 | -0.323 | 0.284 | 0.065  | 0.853 | -0.578 | 0.046 |
| OLIGO_06152 | AW465814 | LOC540037 | 0.022  | 0.865 | 0.495  | 0.224 | -0.350 | 0.208 | -0.127 | 0.544 |
| OLIGO_06153 | AW465842 | LOC539899 | 0.114  | 0.400 | 0.985  | 0.125 | -0.600 | 0.412 | -0.318 | 0.372 |
| OLIGO_06154 | AW465726 | RIPK2     | 0.106  | 0.430 | 0.106  | 0.786 | -0.696 | 0.190 | -0.207 | 0.507 |
| OLIGO_06155 | AW465852 | FBXL17    | -0.338 | 0.264 | 0.519  | 0.113 | -0.015 | 0.946 | -0.077 | 0.636 |
| OLIGO_06156 | AW465886 | DYRK1A    | 0.138  | 0.346 | 0.088  | 0.697 | -0.380 | 0.128 | -0.032 | 0.871 |
| OLIGO_06157 | AW465760 | UTP11L    | 0.007  | 0.970 | -0.468 | 0.082 | -0.285 | 0.221 | -0.380 | 0.087 |
| OLIGO_06158 | AW465767 | UBE2G2    | 0.067  | 0.731 | 0.163  | 0.419 | 0.272  | 0.122 | -0.014 | 0.940 |
| OLIGO_06159 | AW465664 | SERTAD2   | -0.074 | 0.596 | -0.180 | 0.460 | -0.340 | 0.070 | -0.458 | 0.015 |
| OLIGO_06160 | AW465696 | NFATC1    | -0.361 | 0.633 | -0.349 | 0.314 | 0.050  | 0.814 | -0.509 | 0.018 |
| OLIGO_06161 | AW465843 | C6orf55   | 0.075  | 0.743 | -0.313 | 0.387 | -0.249 | 0.297 | -0.454 | 0.050 |
| OLIGO_06163 | AW465887 | VEGF      | -0.515 | 0.036 | -0.176 | 0.602 | 0.096  | 0.735 | -0.120 | 0.549 |
| OLIGO_06167 | AW465731 | TCF19     | 0.174  | 0.601 | 0.275  | 0.094 | 0.103  | 0.368 | -0.452 | 0.012 |
| OLIGO_06168 | AW461536 | ZCCHC9    | -0.007 | 0.970 | -0.107 | 0.668 | -0.023 | 0.931 | -0.370 | 0.026 |
| OLIGO_06169 | AW465888 | ERCC8     | -0.090 | 0.698 | -0.132 | 0.612 | 0.271  | 0.387 | -0.236 | 0.272 |
| OLIGO_06170 | AW465683 | ZNF677    | 0.070  | 0.542 | -0.013 | 0.961 | 0.391  | 0.206 | -0.360 | 0.087 |
| OLIGO_06171 | AW465736 | SORD      | 0.099  | 0.752 | -0.329 | 0.431 | -0.069 | 0.738 | -0.081 | 0.616 |
| OLIGO_06174 | AW461448 | ELOVL7    | -0.134 | 0.682 | -0.214 | 0.731 | -0.755 | 0.065 | -0.393 | 0.114 |
| OLIGO_06175 | AW465706 | TOPORS    | -0.047 | 0.841 | -0.227 | 0.506 | 0.133  | 0.571 | -0.020 | 0.944 |
| OLIGO_06176 | AW465715 | Ptpmt1    | 0.054  | 0.682 | 0.223  | 0.257 | 0.303  | 0.048 | 0.054  | 0.712 |
| OLIGO_06177 | AW465777 | DCLRE1B   | -0.210 | 0.271 | 0.060  | 0.852 | 0.014  | 0.971 | 0.108  | 0.609 |
| OLIGO_06178 | AW465739 | IMMP2L    | -0.204 | 0.124 | 0.281  | 0.513 | 0.442  | 0.356 | 0.012  | 0.951 |
| OLIGO_06180 | AW465670 | POLG      | -0.057 | 0.716 | -0.299 | 0.063 | 0.147  | 0.488 | -0.214 | 0.234 |
| OLIGO_06181 | AW465702 | C10orf28  | -0.262 | 0.123 | -0.341 | 0.187 | -0.356 | 0.077 | -0.266 | 0.196 |
| OLIGO_06183 | AW465849 | PCBP4     | 0.932  | 0.537 | -0.242 | 0.365 | -0.169 | 0.256 | -0.335 | 0.036 |
| OLIGO_06184 | AW465679 | VPS26B    | -0.243 | 0.148 | 0.159  | 0.700 | 0.229  | 0.346 | 0.380  | 0.249 |
| OLIGO_06185 | AW465793 | TRIM65    | -0.372 | 0.029 | -0.116 | 0.699 | 0.154  | 0.516 | -0.224 | 0.330 |
| OLIGO_06186 | AW465850 | PWWP2     | 0.268  | 0.633 | 0.001  | 0.998 | -0.482 | 0.165 | -0.207 | 0.368 |
| OLIGO_06187 | AW466012 | PDK3      | -0.154 | 0.675 | -0.362 | 0.246 | -0.321 | 0.249 | 0.026  | 0.902 |
| OLIGO_06188 | AW465913 | C6orf120  | 0.179  | 0.364 | -0.302 | 0.224 | 0.101  | 0.500 | -0.228 | 0.142 |
| OLIGO_06189 | AW462203 | CRTC3     | 0.135  | 0.332 | 0.248  | 0.591 | 0.249  | 0.212 | -0.490 | 0.011 |
| OLIGO_06190 | AW466008 | CTAGE5    | -0.392 | 0.110 | 0.026  | 0.868 | 0.220  | 0.175 | -0.013 | 0.902 |
| OLIGO_06191 | AW465914 | TMEM50A   | 0.016  | 0.949 | -0.082 | 0.807 | 0.152  | 0.509 | 0.628  | 0.005 |
| OLIGO_06192 | AW465967 | DBNDD1    | -0.444 | 0.178 | 0.051  | 0.838 | -0.026 | 0.895 | -0.208 | 0.273 |
| OLIGO_06193 | AW465980 | HTLF      | 0.000  | 0.999 | -0.333 | 0.210 | 0.069  | 0.792 | 0.430  | 0.050 |
| OLIGO_06196 | AW465908 | LOC253012 | 0.224  | 0.750 | -0.300 | 0.391 | 0.538  | 0.299 | -0.610 | 0.206 |
| OLIGO_06197 | AW466083 | ZDHHC5    | -0.088 | 0.621 | -0.370 | 0.147 | 0.495  | 0.141 | -0.253 | 0.175 |
| OLIGO_06198 | AW461508 | TWISTNB   | -0.113 | 0.552 | 0.164  | 0.425 | 0.144  | 0.412 | -1.140 | 0.001 |
| OLIGO_06199 | AW466001 | BAD       | -0.427 | 0.124 | -0.198 | 0.487 | -0.056 | 0.735 | -0.041 | 0.891 |
| OLIGO_06200 | AW466009 | TIMM8A    | -0.009 | 0.976 | -0.213 | 0.382 | -0.166 | 0.418 | 0.019  | 0.925 |
| OLIGO_06203 | BF045317 | JMJD2C    | -0.685 | 0.026 | 0.149  | 0.593 | -0.325 | 0.177 | -0.463 | 0.017 |
| OLIGO_06205 | AW466070 | KIFC3     | 0.073  | 0.663 | 0.060  | 0.807 | 0.081  | 0.632 | 0.043  | 0.787 |
| OLIGO_06206 | AW466122 | NHLRC2    | -0.126 | 0.655 | -0.525 | 0.123 | -0.402 | 0.142 | 0.010  | 0.963 |
| OLIGO_06207 | AW465994 | GNB2      | 0.071  | 0.703 | 0.036  | 0.853 | 0.196  | 0.121 | -0.421 | 0.005 |
| OLIGO_06208 | AW466039 | BC055107  | -0.135 | 0.643 | -0.177 | 0.491 | -0.042 | 0.843 | -0.356 | 0.215 |

|             |          |           |        |       |        |       |        |       |        |       |
|-------------|----------|-----------|--------|-------|--------|-------|--------|-------|--------|-------|
| OLIGO_06209 | AW466048 | FURIN     | 0.330  | 0.636 | 0.106  | 0.812 | 0.717  | 0.077 | -0.184 | 0.416 |
| OLIGO_06211 | AW466063 | LOC515049 | -0.181 | 0.573 | -0.175 | 0.533 | -0.476 | 0.133 | -0.003 | 0.989 |
| OLIGO_06213 | AW465953 | NSD1      | -0.113 | 0.470 | 0.131  | 0.823 | -0.174 | 0.332 | -0.155 | 0.345 |
| OLIGO_06214 | AW466086 | FBXO32    | -0.109 | 0.913 | -0.529 | 0.553 | 0.089  | 0.885 | 0.915  | 0.008 |
| OLIGO_06215 | AW466124 | COPS2     | 0.273  | 0.279 | 0.398  | 0.555 | 0.541  | 0.408 | 0.073  | 0.789 |
| OLIGO_06216 | AW465906 | DNPEP     | 0.159  | 0.271 | 0.076  | 0.790 | -0.546 | 0.120 | -0.626 | 0.002 |
| OLIGO_06217 | AW461627 | USP14     | 0.161  | 0.305 | -0.314 | 0.215 | -0.245 | 0.282 | 0.200  | 0.191 |
| OLIGO_06219 | AW466087 | IFI6      | 0.047  | 0.867 | -0.014 | 0.968 | -0.468 | 0.229 | 0.070  | 0.796 |
| OLIGO_06220 | AW465975 | TEAD4     | -0.260 | 0.528 | -0.249 | 0.432 | 0.261  | 0.287 | -0.539 | 0.006 |
| OLIGO_06221 | AW466005 | PLA1A     | 0.069  | 0.854 | -0.072 | 0.835 | -0.063 | 0.694 | -0.080 | 0.622 |
| OLIGO_06222 | AW466013 | RIPK1     | -0.055 | 0.747 | -0.010 | 0.973 | 0.022  | 0.926 | 0.130  | 0.364 |
| OLIGO_06223 | AW466051 | ADSL      | 0.209  | 0.233 | -0.795 | 0.005 | 0.033  | 0.886 | -0.270 | 0.197 |
| OLIGO_06224 | AW465932 | ASF1A     | 0.154  | 0.343 | -0.545 | 0.066 | -0.354 | 0.138 | -1.022 | 0.002 |
| OLIGO_06226 | AW466211 | WTAP      | -0.179 | 0.494 | -0.265 | 0.261 | -0.283 | 0.148 | 0.001  | 0.996 |
| OLIGO_06228 | BF046591 | FLJ25067  | -0.380 | 0.088 | 0.147  | 0.658 | -0.270 | 0.303 | -0.005 | 0.974 |
| OLIGO_06230 | BF042585 | S100PBP   | 0.054  | 0.802 | 0.546  | 0.195 | 0.277  | 0.295 | -0.405 | 0.096 |
| OLIGO_06231 | BF042582 | ICMT      | 0.237  | 0.272 | -0.171 | 0.573 | 0.056  | 0.820 | -0.277 | 0.213 |
| OLIGO_06232 | BF044749 | LOC530325 | 0.415  | 0.509 | -0.252 | 0.406 | -0.314 | 0.094 | -0.565 | 0.064 |
| OLIGO_06233 | BF044748 | PTPRG     | -0.395 | 0.179 | -0.389 | 0.139 | -0.070 | 0.727 | -0.710 | 0.058 |
| OLIGO_06236 | BF040868 | PLAA      | -0.024 | 0.908 | 0.467  | 0.408 | -0.236 | 0.555 | 0.276  | 0.297 |
| OLIGO_06237 | BF040872 | HIATL1    | 0.116  | 0.443 | 0.722  | 0.098 | 0.174  | 0.365 | 0.371  | 0.048 |
| OLIGO_06238 | BF040873 | FLJ22662  | 0.383  | 0.429 | 0.061  | 0.805 | -0.024 | 0.878 | -0.158 | 0.523 |
| OLIGO_06239 | BF040867 | TRIM6     | 0.466  | 0.135 | 0.068  | 0.852 | 0.597  | 0.332 | -0.363 | 0.130 |
| OLIGO_06240 | BF040866 | AP1M2     | -0.290 | 0.334 | 0.290  | 0.313 | 0.528  | 0.139 | -0.055 | 0.785 |
| OLIGO_06243 | BF044762 | AIM1      | -0.034 | 0.869 | -0.084 | 0.784 | -0.041 | 0.834 | -0.502 | 0.027 |
| OLIGO_06244 | BF044757 | NUP107    | 0.204  | 0.248 | -0.358 | 0.317 | 0.084  | 0.829 | -0.409 | 0.128 |
| OLIGO_06245 | BF040860 | TXN       | -0.027 | 0.940 | -0.200 | 0.538 | -0.113 | 0.771 | -0.238 | 0.256 |
| OLIGO_06246 | BF046550 | BCKDK     | -0.136 | 0.436 | 0.561  | 0.065 | -0.306 | 0.325 | -0.242 | 0.111 |
| OLIGO_06247 | BF046553 | VAR5      | 0.030  | 0.883 | 0.322  | 0.249 | 0.216  | 0.264 | -0.091 | 0.562 |
| OLIGO_06248 | AW461583 | TMED10    | -0.047 | 0.822 | 0.662  | 0.046 | 0.225  | 0.551 | 0.228  | 0.433 |
| OLIGO_06249 | BF042632 | MLXIPL    | -0.224 | 0.230 | 0.458  | 0.146 | -0.373 | 0.245 | -0.077 | 0.738 |
| OLIGO_06250 | BF042642 | FNTB      | 0.148  | 0.446 | 0.069  | 0.720 | -0.282 | 0.176 | -0.233 | 0.190 |
| OLIGO_06251 | BF044727 | MED4      | 0.107  | 0.418 | 0.264  | 0.328 | -0.139 | 0.508 | -0.140 | 0.450 |
| OLIGO_06254 | BF042604 | FLJ20294  | -0.389 | 0.119 | -0.216 | 0.580 | 0.261  | 0.380 | 0.069  | 0.762 |
| OLIGO_06255 | BF044715 | ITGA3     | -0.060 | 0.881 | -0.016 | 0.963 | -0.382 | 0.051 | -0.710 | 0.006 |
| OLIGO_06256 | BF042608 | LIN7C     | -0.210 | 0.404 | -0.338 | 0.273 | -0.158 | 0.556 | -0.247 | 0.291 |
| OLIGO_06257 | BF044772 | CAMK2D    | 0.005  | 0.981 | 0.139  | 0.663 | -0.101 | 0.668 | 0.400  | 0.122 |
| OLIGO_06258 | BF042630 | KLHL3     | -0.127 | 0.513 | 0.201  | 0.393 | 0.054  | 0.717 | -0.187 | 0.386 |
| OLIGO_06261 | BF046537 | CUTC      | 0.163  | 0.201 | 0.041  | 0.881 | 0.192  | 0.216 | -0.405 | 0.017 |
| OLIGO_06262 | BF040850 | MITF      | -0.108 | 0.614 | 0.303  | 0.034 | 0.208  | 0.192 | 0.574  | 0.007 |
| OLIGO_06264 | BF046534 | SH3YL1    | 0.218  | 0.289 | -0.049 | 0.819 | 0.380  | 0.199 | -0.222 | 0.308 |
| OLIGO_06266 | AW461664 | WBSCR27   | -0.060 | 0.747 | -0.323 | 0.244 | 0.034  | 0.863 | -0.425 | 0.033 |
| OLIGO_06270 | BF044742 | RECQL5    | -0.287 | 0.146 | -0.148 | 0.644 | 0.171  | 0.453 | -0.115 | 0.580 |
| OLIGO_06271 | BF042595 | PIGT      | -0.269 | 0.079 | 0.197  | 0.260 | 0.029  | 0.822 | 0.113  | 0.335 |
| OLIGO_06272 | BF044586 | NFKBIB    | 0.220  | 0.423 | 0.310  | 0.128 | 0.061  | 0.711 | -0.371 | 0.011 |
| OLIGO_06273 | AW461737 | IER5      | -0.155 | 0.454 | 0.294  | 0.363 | -0.153 | 0.406 | 0.114  | 0.341 |
| OLIGO_06276 | BF046528 | HOOK1     | -0.277 | 0.398 | -0.087 | 0.759 | -0.184 | 0.438 | 0.024  | 0.870 |
| OLIGO_06279 | BF044731 | DNAJA2    | 0.021  | 0.897 | 0.136  | 0.554 | -0.349 | 0.085 | -0.408 | 0.027 |
| OLIGO_06280 | BF044735 | CTDSPL2   | -0.183 | 0.231 | 0.082  | 0.754 | -0.196 | 0.292 | -0.021 | 0.899 |
| OLIGO_06281 | BF042596 | CLSTN1    | -0.499 | 0.198 | -0.225 | 0.495 | -0.190 | 0.510 | -0.674 | 0.067 |
| OLIGO_06282 | BF046565 | JAK3      | 0.119  | 0.677 | -0.023 | 0.951 | -0.881 | 0.115 | -0.052 | 0.858 |
| OLIGO_06283 | BF046567 | ZCRB1     | 0.041  | 0.870 | -0.361 | 0.315 | 0.440  | 0.180 | 0.077  | 0.661 |
| OLIGO_06284 | BF046571 | DMTF1     | -0.044 | 0.904 | -0.111 | 0.703 | -0.169 | 0.399 | -0.476 | 0.027 |
| OLIGO_06286 | BF040874 | LOC646431 | 0.238  | 0.538 | -0.141 | 0.418 | -0.239 | 0.325 | -0.056 | 0.834 |
| OLIGO_06287 | BF040897 | LOC617052 | 0.063  | 0.620 | 0.169  | 0.408 | -0.307 | 0.038 | 0.093  | 0.431 |
| OLIGO_06289 | BF044767 | MRPS18A   | 0.069  | 0.729 | 0.098  | 0.507 | -0.127 | 0.506 | -0.151 | 0.238 |
| OLIGO_06293 | BF042762 | NDUFS3    | 0.008  | 0.962 | 0.002  | 0.991 | 0.169  | 0.359 | -0.502 | 0.001 |
| OLIGO_06294 | BF040693 | C12orf52  | -0.321 | 0.294 | 0.156  | 0.588 | -0.317 | 0.246 | 0.014  | 0.951 |
| OLIGO_06297 | AW461753 | PGM2L1    | -0.153 | 0.428 | 0.184  | 0.589 | 0.331  | 0.192 | -0.456 | 0.028 |
| OLIGO_06300 | BF046312 | ILF3      | -0.070 | 0.645 | 0.026  | 0.895 | 0.053  | 0.746 | -0.383 | 0.001 |

|             |          |           |        |       |        |       |        |       |        |       |
|-------------|----------|-----------|--------|-------|--------|-------|--------|-------|--------|-------|
| OLIGO_06302 | BF044261 | SGK3      | -0.504 | 0.496 | -0.051 | 0.902 | 1.338  | 0.033 | -0.416 | 0.202 |
| OLIGO_06303 | BF042776 | JMJD1B    | 0.324  | 0.590 | 0.180  | 0.534 | 0.048  | 0.806 | -0.561 | 0.013 |
| OLIGO_06304 | BF040706 | LOC339105 | -0.162 | 0.647 | -0.652 | 0.231 | 0.166  | 0.464 | -0.313 | 0.161 |
| OLIGO_06305 | AW461416 | LOC653199 | 0.324  | 0.209 | -0.404 | 0.283 | -0.139 | 0.488 | 0.181  | 0.470 |
| OLIGO_06306 | AW461722 | ALPK3     | 0.295  | 0.546 | -0.143 | 0.793 | 0.550  | 0.203 | -0.512 | 0.406 |
| OLIGO_06308 | BF040729 | UBAP2L    | -0.319 | 0.218 | -0.005 | 0.981 | 0.313  | 0.337 | -0.005 | 0.972 |
| OLIGO_06309 | BF044284 | FLJ20551  | -0.066 | 0.734 | -0.094 | 0.687 | -0.123 | 0.424 | -0.072 | 0.590 |
| OLIGO_06311 | BF046336 | MRPS5     | 0.241  | 0.286 | -0.077 | 0.832 | -0.094 | 0.626 | -0.111 | 0.668 |
| OLIGO_06314 | BF040700 | FLJ43806  | -0.277 | 0.368 | -0.105 | 0.799 | -0.156 | 0.655 | -0.015 | 0.959 |
| OLIGO_06315 | BF042769 | PSMA1     | 0.119  | 0.628 | 0.228  | 0.642 | 0.270  | 0.450 | -0.290 | 0.189 |
| OLIGO_06319 | BF042802 | SLC17A5   | 0.105  | 0.510 | -0.310 | 0.497 | -0.194 | 0.633 | -0.270 | 0.420 |
| OLIGO_06320 | AW461687 | CDC34     | -0.151 | 0.262 | -0.029 | 0.860 | 0.099  | 0.596 | -0.073 | 0.514 |
| OLIGO_06325 | BF040723 | TBPL1     | 0.196  | 0.438 | 0.601  | 0.160 | 0.151  | 0.550 | 0.148  | 0.418 |
| OLIGO_06328 | BF044245 | FKBP4     | -0.142 | 0.595 | 0.042  | 0.918 | 0.175  | 0.480 | 0.026  | 0.921 |
| OLIGO_06329 | BF044242 | FLJ10081  | -0.514 | 0.265 | 0.804  | 0.131 | -0.538 | 0.284 | 0.069  | 0.803 |
| OLIGO_06330 | BF044273 | RTTN      | -0.262 | 0.197 | 1.009  | 0.025 | 0.195  | 0.478 | 0.197  | 0.550 |
| OLIGO_06331 | BF042920 | Zfp295    | -0.035 | 0.935 | 0.435  | 0.211 | -0.116 | 0.815 | 0.297  | 0.289 |
| OLIGO_06333 | BF044251 | C14orf46  | -0.533 | 0.021 | 0.692  | 0.150 | -0.396 | 0.308 | -0.043 | 0.848 |
| OLIGO_06334 | BF044250 | C1S       | -0.104 | 0.630 | 0.504  | 0.195 | 0.284  | 0.281 | 0.135  | 0.554 |
| OLIGO_06335 | BF044277 | LOC617475 | 0.113  | 0.581 | 0.044  | 0.858 | -0.262 | 0.184 | -0.321 | 0.137 |
| OLIGO_06338 | BF042759 | RABGEF1   | 0.096  | 0.539 | -0.153 | 0.464 | -0.186 | 0.317 | 0.416  | 0.157 |
| OLIGO_06340 | BF040734 | TIGD2     | -0.121 | 0.770 | -1.117 | 0.011 | -0.372 | 0.597 | -0.240 | 0.532 |
| OLIGO_06342 | BF044233 | TOR1AIP2  | -0.352 | 0.174 | 0.054  | 0.891 | 0.446  | 0.374 | 0.458  | 0.075 |
| OLIGO_06344 | BF042937 | CCRN4L    | 0.176  | 0.533 | 0.370  | 0.262 | 0.130  | 0.688 | -0.047 | 0.796 |
| OLIGO_06345 | BF040682 | IFT74     | -0.180 | 0.560 | 0.032  | 0.912 | -0.012 | 0.948 | 0.101  | 0.593 |
| OLIGO_06349 | AW461715 | PEBP1     | 0.272  | 0.312 | -0.032 | 0.910 | -0.457 | 0.292 | 0.034  | 0.874 |
| OLIGO_06351 | BF044267 | ZC3H11A   | -0.065 | 0.662 | -0.392 | 0.453 | -0.515 | 0.151 | -0.269 | 0.191 |
| OLIGO_06352 | BF044268 | Lmo7      | -0.232 | 0.567 | 0.117  | 0.810 | 0.514  | 0.120 | -0.064 | 0.883 |
| OLIGO_06353 | BF044215 | SCRN2     | -0.104 | 0.590 | 0.540  | 0.102 | -0.304 | 0.218 | -0.092 | 0.622 |
| OLIGO_06355 | BF044464 | RPL5      | -0.008 | 0.952 | 0.046  | 0.835 | 0.157  | 0.340 | -0.336 | 0.018 |
| OLIGO_06356 | BF042427 | C9orf78   | -0.051 | 0.720 | -0.146 | 0.599 | -0.068 | 0.786 | -0.464 | 0.014 |
| OLIGO_06359 | BF045949 | PROSC     | -0.131 | 0.668 | -0.354 | 0.479 | 0.324  | 0.344 | -0.013 | 0.971 |
| OLIGO_06360 | BF040532 | ABCA1     | 0.063  | 0.819 | -0.138 | 0.690 | -0.124 | 0.741 | 0.797  | 0.001 |
| OLIGO_06361 | BF045982 | EPB41L2   | 0.046  | 0.707 | -0.127 | 0.598 | -0.636 | 0.026 | 0.201  | 0.342 |
| OLIGO_06362 | BF044476 | RAB25     | -0.631 | 0.052 | -0.474 | 0.074 | 0.624  | 0.357 | -0.229 | 0.129 |
| OLIGO_06363 | BF044475 | TUG1      | -0.054 | 0.744 | -0.170 | 0.350 | -0.251 | 0.165 | -0.090 | 0.540 |
| OLIGO_06365 | BF040526 | C10orf77  | 0.312  | 0.468 | 0.010  | 0.979 | 0.284  | 0.257 | -0.162 | 0.458 |
| OLIGO_06370 | AW461427 | CYP17A1   | -0.276 | 0.086 | -0.093 | 0.623 | 0.370  | 0.371 | -0.133 | 0.513 |
| OLIGO_06371 | AW461704 | ZC3HAV1   | -0.094 | 0.522 | 0.095  | 0.810 | -0.518 | 0.074 | -0.099 | 0.554 |
| OLIGO_06372 | BF046118 | PSMD1     | 0.092  | 0.469 | -0.206 | 0.298 | -0.182 | 0.368 | -0.378 | 0.107 |
| OLIGO_06379 | AW461802 | P8        | -0.365 | 0.313 | -0.186 | 0.627 | 0.302  | 0.323 | 0.534  | 0.004 |
| OLIGO_06380 | BF040045 | TMEM16J   | -0.468 | 0.198 | -0.024 | 0.939 | 0.151  | 0.628 | -0.095 | 0.600 |
| OLIGO_06382 | BF042175 | SERPINI1  | -0.206 | 0.219 | 0.011  | 0.968 | -0.223 | 0.556 | -0.906 | 0.003 |
| OLIGO_06383 | BF046293 | C1orf163  | 0.050  | 0.724 | -0.213 | 0.263 | 0.190  | 0.131 | 0.101  | 0.452 |
| OLIGO_06384 | BF040508 | YTHDC2    | -0.451 | 0.240 | -0.325 | 0.147 | 0.126  | 0.420 | 0.435  | 0.054 |
| OLIGO_06386 | AW461557 | C18orf10  | -0.135 | 0.666 | 0.049  | 0.793 | -0.421 | 0.071 | -0.434 | 0.053 |
| OLIGO_06388 | BF040016 | GGPS1     | -0.127 | 0.364 | 0.066  | 0.831 | 0.108  | 0.653 | -0.577 | 0.010 |
| OLIGO_06390 | AW461581 | APIG2     | -0.432 | 0.019 | 0.281  | 0.167 | 0.175  | 0.384 | 0.005  | 0.968 |
| OLIGO_06392 | BF046128 | NCOA6IP   | -0.045 | 0.873 | -0.162 | 0.480 | -0.144 | 0.342 | -0.284 | 0.126 |
| OLIGO_06393 | BF040008 | QRSL1     | -0.014 | 0.895 | -0.112 | 0.610 | -0.010 | 0.952 | -0.385 | 0.029 |
| OLIGO_06394 | BF040011 | TRIB3     | -0.199 | 0.521 | -0.062 | 0.747 | -0.139 | 0.553 | -0.194 | 0.171 |
| OLIGO_06395 | BF040059 | ITGB1BP1  | 0.047  | 0.843 | -0.067 | 0.739 | -0.193 | 0.357 | -0.117 | 0.437 |
| OLIGO_06397 | BF046291 | MESDC2    | 0.322  | 0.079 | -0.558 | 0.145 | 0.032  | 0.907 | -0.094 | 0.701 |
| OLIGO_06398 | BF046141 | PTPLA     | -0.124 | 0.509 | 0.225  | 0.208 | 0.128  | 0.394 | -0.080 | 0.670 |
| OLIGO_06401 | BF040065 | CD109     | 0.279  | 0.220 | -0.373 | 0.216 | -0.092 | 0.689 | -0.051 | 0.760 |
| OLIGO_06404 | AW461605 | ALKBH3    | 0.195  | 0.410 | -0.289 | 0.195 | -0.004 | 0.982 | -0.012 | 0.939 |
| OLIGO_06405 | BF046134 | GJA5      | -0.979 | 0.007 | -0.783 | 0.226 | 0.007  | 0.989 | 0.268  | 0.237 |
| OLIGO_06406 | BF046136 | SNX16     | 1.137  | 0.023 | -0.295 | 0.257 | 0.226  | 0.487 | 0.124  | 0.556 |
| OLIGO_06408 | BF044647 | GTF2H1    | 0.364  | 0.147 | -0.857 | 0.006 | 0.576  | 0.180 | 0.371  | 0.130 |
| OLIGO_06409 | BF040051 | JTV1      | 0.101  | 0.611 | -0.279 | 0.411 | 0.088  | 0.789 | -0.711 | 0.073 |

|             |          |           |        |       |        |       |        |       |        |       |
|-------------|----------|-----------|--------|-------|--------|-------|--------|-------|--------|-------|
| OLIGO_06410 | BF042179 | TRPM6     | -0.332 | 0.400 | -0.101 | 0.891 | 0.846  | 0.165 | -0.356 | 0.558 |
| OLIGO_06412 | AW461538 | MRPL33    | 0.005  | 0.972 | -0.124 | 0.726 | 0.380  | 0.204 | -0.379 | 0.136 |
| OLIGO_06413 | BF042178 | SMOX      | -0.237 | 0.597 | -0.707 | 0.217 | 0.204  | 0.732 | 0.053  | 0.848 |
| OLIGO_06414 | BF040066 | NFATC3    | -0.149 | 0.565 | -0.352 | 0.311 | 0.049  | 0.765 | 0.130  | 0.454 |
| OLIGO_06415 | BF045658 | TRAF6     | 0.185  | 0.283 | -0.401 | 0.116 | -0.144 | 0.459 | -0.125 | 0.620 |
| OLIGO_06416 | BF041744 | P15RS     | -0.242 | 0.103 | -0.295 | 0.143 | -0.033 | 0.845 | -0.466 | 0.022 |
| OLIGO_06418 | AW461550 | ANXA4     | 0.013  | 0.947 | 0.265  | 0.531 | 0.396  | 0.398 | -0.562 | 0.033 |
| OLIGO_06419 | BF040218 | DDX17     | -0.281 | 0.373 | 0.015  | 0.969 | -0.133 | 0.535 | -0.287 | 0.179 |
| OLIGO_06422 | BF040210 | DAB2      | -0.146 | 0.703 | -0.717 | 0.153 | 0.766  | 0.239 | 0.281  | 0.324 |
| OLIGO_06424 | AW461559 | PLOD2     | 0.806  | 0.533 | -0.610 | 0.233 | 0.692  | 0.273 | -0.236 | 0.374 |
| OLIGO_06427 | BF045797 | PHF1      | -0.033 | 0.846 | 0.450  | 0.082 | 0.320  | 0.191 | -0.005 | 0.970 |
| OLIGO_06428 | BF045659 | TUBGCP2   | -0.054 | 0.752 | 0.682  | 0.110 | 0.148  | 0.606 | 0.406  | 0.091 |
| OLIGO_06429 | BF045661 | CPVL      | -0.392 | 0.087 | 0.486  | 0.377 | -0.468 | 0.380 | -0.056 | 0.853 |
| OLIGO_06430 | BF043722 | IFNGR2    | -0.204 | 0.493 | 0.324  | 0.298 | 0.638  | 0.145 | 0.540  | 0.016 |
| OLIGO_06432 | BF043749 | ADFP      | 0.317  | 0.368 | 0.677  | 0.132 | 0.656  | 0.099 | 0.035  | 0.900 |
| OLIGO_06433 | BF041790 | GALNT1    | 0.050  | 0.812 | -0.228 | 0.346 | 0.264  | 0.336 | -0.073 | 0.721 |
| OLIGO_06434 | BF041789 | SPTLC2    | -0.011 | 0.943 | 0.101  | 0.609 | 0.009  | 0.962 | -0.060 | 0.683 |
| OLIGO_06436 | BF040226 | ERGIC3    | -0.116 | 0.606 | -0.162 | 0.525 | 0.082  | 0.706 | -0.259 | 0.133 |
| OLIGO_06437 | AW461501 | TNFAIP6   | 0.210  | 0.414 | 0.126  | 0.734 | -0.172 | 0.566 | -0.489 | 0.126 |
| OLIGO_06438 | BF043887 | SYNGR1    | 0.163  | 0.550 | 1.176  | 0.019 | 0.205  | 0.353 | 0.104  | 0.462 |
| OLIGO_06439 | BF041729 | CRIP1     | 0.080  | 0.733 | 0.686  | 0.039 | -0.154 | 0.502 | 0.230  | 0.128 |
| OLIGO_06441 | BF045646 | LOC203547 | 0.304  | 0.087 | 0.758  | 0.131 | -0.041 | 0.835 | 0.230  | 0.355 |
| OLIGO_06442 | BF040175 | TOM1      | 0.033  | 0.904 | 0.042  | 0.825 | 0.146  | 0.433 | -0.111 | 0.391 |
| OLIGO_06444 | BF045645 | CCBP2     | -0.256 | 0.037 | 0.247  | 0.455 | 0.119  | 0.507 | -0.882 | 0.002 |
| OLIGO_06445 | BF045812 | SEN5      | -0.541 | 0.225 | -0.096 | 0.797 | -0.243 | 0.499 | 0.129  | 0.613 |
| OLIGO_06446 | BF040225 | SLC37A1   | -0.109 | 0.648 | 0.093  | 0.780 | 0.550  | 0.175 | -0.160 | 0.339 |
| OLIGO_06448 | BF040223 | POLR3F    | 0.252  | 0.562 | -0.260 | 0.354 | 0.057  | 0.808 | -0.120 | 0.525 |
| OLIGO_06449 | BF043883 | PSPH      | 0.168  | 0.446 | 0.232  | 0.613 | -0.544 | 0.386 | -0.172 | 0.474 |
| OLIGO_06450 | BF041721 | SOSTDC1   | -0.433 | 0.284 | -0.340 | 0.098 | -0.210 | 0.261 | -0.006 | 0.985 |
| OLIGO_06452 | BF041720 | TINAGL1   | 0.136  | 0.687 | -0.188 | 0.655 | -0.216 | 0.476 | -0.373 | 0.150 |
| OLIGO_06454 | BF041724 | LOC525506 | -0.093 | 0.575 | 0.061  | 0.843 | 0.262  | 0.447 | 0.132  | 0.378 |
| OLIGO_06456 | AW461682 | SLC4A11   | -0.445 | 0.038 | 0.256  | 0.336 | -0.140 | 0.499 | -0.092 | 0.654 |
| OLIGO_06457 | BF041764 | DEDD2     | -0.444 | 0.082 | -0.284 | 0.078 | -0.188 | 0.112 | -0.177 | 0.161 |
| OLIGO_06459 | BF040198 | ARHGEF16  | -0.885 | 0.232 | -0.368 | 0.056 | 0.031  | 0.892 | -0.930 | 0.001 |
| OLIGO_06460 | BF045654 | CBX8      | -0.163 | 0.494 | -0.261 | 0.378 | -0.200 | 0.463 | -0.570 | 0.135 |
| OLIGO_06461 | BF045655 | HAP1      | -0.017 | 0.944 | -0.219 | 0.437 | 0.807  | 0.159 | -0.655 | 0.183 |
| OLIGO_06463 | AW461692 | SNRPD1    | -0.017 | 0.926 | 0.046  | 0.813 | -0.390 | 0.244 | -0.480 | 0.035 |
| OLIGO_06464 | BF043899 | DCXR      | -0.268 | 0.351 | 0.329  | 0.078 | 0.116  | 0.383 | -0.196 | 0.322 |
| OLIGO_06465 | BF043744 | NPNT      | -0.173 | 0.493 | -0.287 | 0.629 | -0.069 | 0.841 | -0.616 | 0.098 |
| OLIGO_06467 | BF045656 | LOC644538 | 1.882  | 0.140 | -1.045 | 0.047 | -0.108 | 0.862 | 0.026  | 0.934 |
| OLIGO_06468 | BF040192 | ZMAT1     | -0.168 | 0.624 | -0.207 | 0.573 | 0.155  | 0.653 | -0.088 | 0.761 |
| OLIGO_06469 | BF040187 | TFE3      | 0.183  | 0.349 | -0.080 | 0.776 | -0.004 | 0.978 | -0.076 | 0.645 |
| OLIGO_06471 | BF043894 | APITD1    | -0.154 | 0.199 | -0.156 | 0.517 | -0.270 | 0.188 | -1.076 | 0.000 |
| OLIGO_06473 | BF041738 | CUL2      | 0.048  | 0.877 | -0.626 | 0.142 | -0.241 | 0.276 | -0.441 | 0.136 |
| OLIGO_06474 | BF041732 | SLC4A9    | -0.397 | 0.526 | 0.117  | 0.701 | 0.156  | 0.566 | -0.033 | 0.847 |
| OLIGO_06476 | BF041770 | CD68      | -0.013 | 0.923 | -0.466 | 0.251 | -0.324 | 0.559 | -0.011 | 0.976 |
| OLIGO_06477 | BF045807 | MOCOS     | -0.399 | 0.353 | -0.011 | 0.970 | 0.192  | 0.516 | 0.228  | 0.315 |
| OLIGO_06478 | BF040241 | MGC44505  | 0.308  | 0.554 | -0.224 | 0.423 | -0.358 | 0.064 | -0.388 | 0.042 |
| OLIGO_06479 | BF045810 | MAN1A2    | -0.519 | 0.111 | -0.207 | 0.312 | 0.363  | 0.156 | -0.043 | 0.782 |
| OLIGO_06482 | BF043738 | TKT       | 0.079  | 0.738 | 0.138  | 0.552 | 0.266  | 0.308 | -1.105 | 0.000 |
| OLIGO_06483 | BF039801 | EXOSC3    | -0.024 | 0.888 | -0.036 | 0.909 | -0.229 | 0.396 | -0.734 | 0.005 |
| OLIGO_06484 | BF039800 | SRC       | -0.013 | 0.928 | 0.276  | 0.465 | 0.379  | 0.259 | 0.096  | 0.662 |
| OLIGO_06485 | BF041917 | SEC24B    | -0.138 | 0.369 | -0.097 | 0.765 | -0.170 | 0.658 | -0.578 | 0.041 |
| OLIGO_06487 | BF041931 | CHST6     | 0.176  | 0.387 | -0.367 | 0.534 | -0.249 | 0.599 | -0.097 | 0.745 |
| OLIGO_06488 | AW461838 | WNT6      | 0.008  | 0.984 | 0.063  | 0.729 | 0.393  | 0.035 | 0.617  | 0.018 |
| OLIGO_06489 | BF045469 | CXXC1     | -0.135 | 0.194 | 0.496  | 0.305 | 0.483  | 0.192 | 1.809  | 0.001 |
| OLIGO_06490 | BF043423 | SLC10A1   | -0.312 | 0.071 | -0.008 | 0.982 | -0.404 | 0.187 | 0.206  | 0.312 |
| OLIGO_06491 | BF045491 | ARL4D     | -0.018 | 0.914 | -0.082 | 0.653 | -0.124 | 0.441 | -0.822 | 0.003 |
| OLIGO_06492 | BF041921 | RTN4RL2   | -0.305 | 0.113 | -0.180 | 0.522 | 0.099  | 0.683 | -0.094 | 0.696 |
| OLIGO_06494 | BF039686 | WIPI2     | -0.039 | 0.837 | -0.050 | 0.804 | 0.148  | 0.612 | -0.473 | 0.093 |

|             |               |           |        |       |        |       |        |       |        |       |
|-------------|---------------|-----------|--------|-------|--------|-------|--------|-------|--------|-------|
| OLIGO_06495 | BF039689      | DNAJB11   | -0.012 | 0.959 | -0.125 | 0.638 | 0.098  | 0.745 | -0.265 | 0.115 |
| OLIGO_06497 | BF039715      | LHX6      | 0.044  | 0.847 | 0.257  | 0.540 | 0.122  | 0.640 | 0.494  | 0.121 |
| OLIGO_06499 | BF045488      | UFM1      | 0.242  | 0.207 | -0.669 | 0.056 | -0.324 | 0.219 | -0.387 | 0.205 |
| OLIGO_06502 | AW461694      | IRF6      | 0.439  | 0.217 | -0.670 | 0.045 | 0.000  | 1.000 | 0.178  | 0.378 |
| OLIGO_06503 | BF041943      | STOML3    | -0.231 | 0.645 | 0.040  | 0.925 | -0.027 | 0.938 | -0.839 | 0.064 |
| OLIGO_06505 | BF043366      | SLC26A2   | 0.009  | 0.969 | 0.297  | 0.275 | 0.095  | 0.652 | -0.018 | 0.922 |
| OLIGO_06507 | BF045632      | KIAA1143  | 0.050  | 0.772 | 0.047  | 0.880 | 0.107  | 0.451 | -0.244 | 0.216 |
| OLIGO_06508 | BF045634      | AP3S1     | 0.085  | 0.511 | 0.191  | 0.525 | 0.404  | 0.163 | -0.354 | 0.105 |
| OLIGO_06509 | BF043369      | ITFG3     | -0.161 | 0.346 | 0.206  | 0.508 | 0.551  | 0.128 | -0.101 | 0.631 |
| OLIGO_06510 | BF042147      | RY1       | 0.016  | 0.934 | -0.301 | 0.296 | -0.437 | 0.089 | 0.098  | 0.599 |
| OLIGO_06511 | BF039771      | NDUFAB1   | 0.167  | 0.228 | -0.393 | 0.123 | -0.018 | 0.924 | 0.087  | 0.588 |
| OLIGO_06514 | BF039797      | LIPE      | -0.134 | 0.764 | -0.085 | 0.663 | -0.061 | 0.575 | 0.159  | 0.326 |
| OLIGO_06520 | AW461676      | KCTD11    | 0.045  | 0.871 | 0.056  | 0.851 | -0.168 | 0.427 | 0.518  | 0.241 |
| OLIGO_06524 | BF044548      | RPN2      | 0.155  | 0.349 | 0.481  | 0.490 | 1.385  | 0.026 | -0.891 | 0.095 |
| OLIGO_06526 | AW462048      | GORASP2   | 0.001  | 0.995 | -0.120 | 0.686 | 0.209  | 0.104 | -0.119 | 0.437 |
| OLIGO_06527 | AW465609      | CITED1    | 0.153  | 0.648 | -0.452 | 0.360 | 1.184  | 0.127 | -0.108 | 0.685 |
| OLIGO_06528 | AW464672      | QSCN6     | -0.162 | 0.487 | 0.374  | 0.452 | 0.415  | 0.267 | 0.332  | 0.119 |
| OLIGO_06530 | AW461766      | LLGL2     | -0.144 | 0.460 | -0.081 | 0.861 | 0.351  | 0.344 | -0.210 | 0.533 |
| OLIGO_06531 | AW461999      | HSPC023   | -0.111 | 0.522 | -0.408 | 0.312 | -0.446 | 0.191 | -0.473 | 0.037 |
| OLIGO_06534 | AW461852      | SLC27A2   | -0.552 | 0.662 | 0.173  | 0.774 | 0.244  | 0.680 | 0.535  | 0.416 |
| OLIGO_06535 | BF045342      | TPM1      | 0.066  | 0.793 | 0.942  | 0.222 | 0.537  | 0.471 | 0.623  | 0.025 |
| OLIGO_06537 | AW462937      | MSH2      | 0.145  | 0.336 | 0.400  | 0.385 | -0.270 | 0.166 | -0.023 | 0.930 |
| OLIGO_06538 | BM363963      | XDH       | 0.050  | 0.787 | 0.683  | 0.403 | -0.340 | 0.465 | 0.698  | 0.048 |
| OLIGO_06540 | AW461688      | C7orf11   | 0.218  | 0.113 | -0.175 | 0.466 | -0.394 | 0.131 | -0.280 | 0.224 |
| OLIGO_06541 | AW462432      | CTGF      | 0.151  | 0.556 | 0.023  | 0.939 | -0.075 | 0.840 | 0.535  | 0.135 |
| OLIGO_06542 | AW463778      | PRPS1     | 0.083  | 0.670 | 0.027  | 0.923 | -0.696 | 0.099 | -0.485 | 0.013 |
| OLIGO_06543 | BF440323      | CRI1      | 0.025  | 0.885 | -0.238 | 0.489 | -0.428 | 0.085 | 0.224  | 0.368 |
| OLIGO_06544 | BF045470      | ICT1      | 0.087  | 0.798 | -0.335 | 0.275 | -0.167 | 0.478 | -1.230 | 0.001 |
| OLIGO_06545 | AW463099      | RPL19     | 0.224  | 0.158 | -0.058 | 0.900 | 0.484  | 0.328 | -0.013 | 0.968 |
| OLIGO_06547 | AW462944      | HSPC148   | -0.101 | 0.583 | -0.247 | 0.318 | 0.036  | 0.848 | -0.342 | 0.062 |
| OLIGO_06548 | BF045613      | SC4MOL    | -0.008 | 0.969 | -0.097 | 0.665 | -0.116 | 0.652 | -0.687 | 0.000 |
| OLIGO_06551 | BF042034      | ZMAT2     | 0.112  | 0.376 | -0.061 | 0.737 | -0.204 | 0.100 | -0.006 | 0.961 |
| OLIGO_06552 | AW461435      | Slc12a9   | -0.035 | 0.895 | 0.271  | 0.314 | 0.224  | 0.437 | -0.058 | 0.699 |
| OLIGO_06553 | AW461818      | CCL14     | -0.250 | 0.247 | -0.253 | 0.327 | -0.043 | 0.760 | 0.219  | 0.276 |
| OLIGO_06554 | AW466134      | AASDHPPT  | -0.075 | 0.553 | 0.198  | 0.453 | 0.051  | 0.872 | -0.646 | 0.008 |
| OLIGO_06560 | AW461442      | BANF1     | -0.052 | 0.788 | 0.062  | 0.801 | 0.128  | 0.514 | -0.348 | 0.050 |
| OLIGO_06578 | AW461555      | C3orf28   | -0.124 | 0.670 | -0.303 | 0.355 | -0.303 | 0.273 | -0.941 | 0.000 |
| OLIGO_06579 | AW462449      | EEF1B2    | 0.081  | 0.778 | -0.225 | 0.629 | 0.310  | 0.399 | -0.661 | 0.007 |
| OLIGO_06590 | BF044310      | LAPTM4A   | 0.230  | 0.335 | 0.105  | 0.668 | -0.121 | 0.467 | 0.001  | 0.998 |
| OLIGO_06591 | AW465555      | CAPZA1    | 0.099  | 0.418 | 0.026  | 0.923 | -0.168 | 0.404 | -0.195 | 0.347 |
| OLIGO_06592 | BF040003      | IARS2     | -0.014 | 0.909 | 0.192  | 0.508 | 0.260  | 0.049 | -0.482 | 0.002 |
| OLIGO_06594 | BF042283      | RWDD1     | 0.379  | 0.022 | -0.651 | 0.020 | -0.216 | 0.430 | -0.168 | 0.542 |
| OLIGO_06598 | AW461795      | MCEE      | 0.250  | 0.214 | -0.309 | 0.164 | 0.045  | 0.703 | -0.805 | 0.000 |
| OLIGO_06602 | AW463516      | PRDX2     | 0.148  | 0.597 | -0.086 | 0.848 | -0.120 | 0.572 | -0.579 | 0.006 |
| OLIGO_06603 | AW462994      | NUP62     | -0.866 | 0.058 | -0.043 | 0.883 | 0.230  | 0.273 | -0.527 | 0.007 |
| OLIGO_06604 | AW461727      | HOOK1     | 0.566  | 0.341 | 0.071  | 0.826 | 0.027  | 0.923 | -0.059 | 0.745 |
| OLIGO_06608 | BF042010      | FDXR      | 0.135  | 0.339 | -0.010 | 0.977 | -0.146 | 0.540 | 0.104  | 0.495 |
| OLIGO_06609 | AW461337      | MARVELD2  | 0.132  | 0.605 | -0.050 | 0.868 | -0.318 | 0.107 | 0.040  | 0.791 |
| OLIGO_06615 | AW461564      | DAD1      | 0.141  | 0.460 | -0.224 | 0.312 | -0.208 | 0.547 | -0.642 | 0.002 |
| OLIGO_06619 | BM362245      | NUDT2     | -0.443 | 0.272 | 0.164  | 0.427 | 0.049  | 0.686 | -0.312 | 0.191 |
| OLIGO_06620 | AW465559      | C10orf118 | 0.011  | 0.977 | 0.053  | 0.877 | 0.395  | 0.340 | 0.397  | 0.090 |
| OLIGO_06621 | AW461804      | AI427138  | 0.218  | 0.487 | -0.052 | 0.937 | 1.003  | 0.214 | 0.596  | 0.024 |
| OLIGO_06626 | BM365700      | JAK1      | 0.061  | 0.782 | -0.055 | 0.871 | -1.090 | 0.042 | -0.039 | 0.854 |
| OLIGO_06630 | BP230002B10B6 | UQCRB     | 0.091  | 0.617 | 0.649  | 0.263 | 0.057  | 0.820 | 0.204  | 0.461 |
| OLIGO_06633 | BF039865      | TALDO1    | 0.198  | 0.303 | 0.306  | 0.276 | 0.139  | 0.326 | 0.107  | 0.525 |
| OLIGO_06635 | AW461693      | LOC618151 | 0.584  | 0.046 | -0.005 | 0.990 | 0.457  | 0.312 | -0.081 | 0.762 |
| OLIGO_06644 | AW462901      | GMFG      | -0.059 | 0.666 | 0.048  | 0.880 | 0.066  | 0.791 | 0.239  | 0.316 |
| OLIGO_06646 | AW462040      | CALR      | -0.020 | 0.901 | -0.287 | 0.437 | 0.114  | 0.807 | -0.490 | 0.036 |
| OLIGO_06653 | AW461781      | MAN2A2    | -0.204 | 0.274 | 0.290  | 0.195 | 0.297  | 0.089 | -0.123 | 0.421 |
| OLIGO_06668 | BM362152      | CHCHD1    | 0.151  | 0.433 | -0.321 | 0.527 | 0.013  | 0.948 | -0.310 | 0.139 |

|             |               |              |        |       |        |       |        |       |        |       |
|-------------|---------------|--------------|--------|-------|--------|-------|--------|-------|--------|-------|
| OLIGO_06670 | AW462019      | WDR8         | -0.109 | 0.417 | -0.072 | 0.829 | 0.017  | 0.929 | -0.492 | 0.027 |
| OLIGO_06673 | AW463306      | GOLGB1       | 0.320  | 0.241 | 0.000  | 0.999 | 0.336  | 0.349 | -0.064 | 0.715 |
| OLIGO_06676 | BF043968      | MRPL41       | -0.002 | 0.991 | -0.116 | 0.628 | 0.325  | 0.121 | -0.678 | 0.001 |
| OLIGO_06681 | AW465295      | CCDC8        | -0.330 | 0.244 | -0.353 | 0.369 | 0.193  | 0.355 | -0.317 | 0.055 |
| OLIGO_06687 | BF042451      | MGST3        | -0.187 | 0.495 | -0.094 | 0.722 | -0.074 | 0.770 | -0.848 | 0.000 |
| OLIGO_06692 | BF039702      | NME2         | 0.033  | 0.847 | -0.205 | 0.399 | -0.198 | 0.409 | -0.444 | 0.013 |
| OLIGO_06697 | AW461900      | THYN1        | 0.183  | 0.246 | -0.692 | 0.059 | -0.052 | 0.712 | -0.723 | 0.044 |
| OLIGO_06699 | AW463557      | ITGB4BP      | 0.070  | 0.740 | 0.196  | 0.545 | -0.127 | 0.469 | -0.330 | 0.022 |
| OLIGO_06706 | BM366715      | TOMM7        | 0.083  | 0.691 | -0.137 | 0.540 | -0.441 | 0.099 | -0.512 | 0.014 |
| OLIGO_06708 | AW462998      | C6orf129     | 0.311  | 0.076 | 0.477  | 0.365 | 0.324  | 0.165 | -0.637 | 0.026 |
| OLIGO_06710 | AW465134      | CCT6A        | -0.016 | 0.944 | -0.293 | 0.396 | 0.332  | 0.474 | -0.698 | 0.001 |
| OLIGO_06713 | BM365979      | CCDC42       | -0.059 | 0.840 | 0.429  | 0.319 | -0.353 | 0.082 | -0.104 | 0.608 |
| OLIGO_06715 | BF043994      | MRPL42       | 0.031  | 0.812 | 0.007  | 0.974 | -0.143 | 0.565 | -0.645 | 0.004 |
| OLIGO_06722 | AW463716      | ZFYVE21      | 0.079  | 0.716 | -0.148 | 0.406 | 0.312  | 0.144 | -0.144 | 0.487 |
| OLIGO_06723 | AW461872      | MSR1         | 0.324  | 0.573 | -0.494 | 0.180 | -0.119 | 0.753 | -0.112 | 0.783 |
| OLIGO_06729 | BF039250      | PHPT1        | 0.146  | 0.257 | 0.038  | 0.896 | 0.380  | 0.247 | -0.247 | 0.192 |
| OLIGO_06732 | AW461882      | ATF7IP       | -0.400 | 0.074 | 0.196  | 0.442 | -0.234 | 0.179 | -0.088 | 0.636 |
| OLIGO_06734 | AW464268      | ACSL6        | -0.311 | 0.345 | -0.214 | 0.361 | 0.768  | 0.192 | 0.021  | 0.948 |
| OLIGO_06742 | AW4641934     | TPARL        | -0.070 | 0.690 | -0.319 | 0.208 | 0.067  | 0.744 | -0.213 | 0.165 |
| OLIGO_06746 | AW464614      | PFKL         | -0.261 | 0.200 | -0.060 | 0.895 | 0.228  | 0.453 | -0.124 | 0.596 |
| OLIGO_06748 | AW463952      | DNAJC10      | 0.045  | 0.879 | -0.355 | 0.352 | -0.111 | 0.577 | -0.504 | 0.033 |
| OLIGO_06751 | BF043418      | LXN          | -0.108 | 0.648 | 0.086  | 0.725 | 0.820  | 0.001 | -0.308 | 0.224 |
| OLIGO_06759 | BF046377      | PCNA         | -0.204 | 0.130 | -0.040 | 0.891 | -0.261 | 0.350 | -0.662 | 0.001 |
| OLIGO_06762 | AW463340      | MGC127123    | 0.087  | 0.665 | -0.570 | 0.003 | -0.161 | 0.200 | 0.463  | 0.009 |
| OLIGO_06764 | BF042062      | SLC40A1      | -0.029 | 0.911 | -0.724 | 0.221 | 0.245  | 0.630 | 0.654  | 0.011 |
| OLIGO_06773 | BM365552      | DKFZp7621137 | -0.177 | 0.488 | -0.205 | 0.617 | -0.515 | 0.164 | -0.275 | 0.145 |
| OLIGO_06775 | AW461984      | PAK6         | -0.206 | 0.477 | 0.236  | 0.354 | 0.537  | 0.045 | 0.156  | 0.402 |
| OLIGO_06781 | AW463495      | MORF4L1      | 0.087  | 0.735 | 0.132  | 0.719 | 0.253  | 0.392 | -0.119 | 0.488 |
| OLIGO_06792 | BF040179      | KPNA2        | 0.066  | 0.631 | 0.196  | 0.517 | -0.208 | 0.295 | -0.676 | 0.001 |
| OLIGO_06793 | AW461367      | DKK4         | 0.373  | 0.284 | 0.043  | 0.862 | 0.040  | 0.815 | -0.439 | 0.013 |
| OLIGO_06798 | BF045419      | NME3         | 0.035  | 0.785 | 0.192  | 0.576 | 0.034  | 0.883 | 0.259  | 0.176 |
| OLIGO_06801 | BP22000611103 | RHOA         | -0.062 | 0.818 | 0.231  | 0.314 | 0.279  | 0.476 | -0.310 | 0.060 |
| OLIGO_06802 | BF042135      | STMN1        | -0.166 | 0.480 | 0.134  | 0.691 | -0.760 | 0.156 | -0.755 | 0.000 |
| OLIGO_06803 | BM366532      | ANG          | -0.168 | 0.521 | -0.029 | 0.951 | -0.649 | 0.089 | -0.380 | 0.218 |
| OLIGO_06804 | BF041433      | RFP2         | 0.077  | 0.695 | 0.345  | 0.350 | -0.040 | 0.917 | -0.132 | 0.506 |
| OLIGO_06811 | AW462257      | CAPZA2       | 0.151  | 0.355 | 0.699  | 0.128 | 0.312  | 0.081 | 0.355  | 0.114 |
| OLIGO_06815 | AW464821      | EXT1         | -0.020 | 0.896 | 0.577  | 0.097 | -0.578 | 0.180 | 0.124  | 0.498 |
| OLIGO_06817 | AW466200      | CRABP2       | -0.212 | 0.284 | -0.557 | 0.357 | -0.313 | 0.497 | -0.269 | 0.393 |
| OLIGO_06819 | AW461946      | FLJ20487     | 0.005  | 0.982 | -0.507 | 0.153 | -0.210 | 0.519 | -0.547 | 0.015 |
| OLIGO_06820 | BF043165      | PAIP2        | -0.042 | 0.817 | -0.388 | 0.227 | -0.240 | 0.438 | -0.807 | 0.009 |
| OLIGO_06822 | AW465171      | C1QA         | -0.289 | 0.246 | -0.028 | 0.959 | -0.522 | 0.271 | 0.266  | 0.406 |
| OLIGO_06829 | AW463762      | COL5A2       | -0.299 | 0.217 | -0.779 | 0.387 | 0.848  | 0.376 | 0.298  | 0.237 |
| OLIGO_06830 | BM362859      | PTGIS        | -0.442 | 0.274 | -0.280 | 0.419 | 0.079  | 0.760 | -0.268 | 0.146 |
| OLIGO_06831 | AW465044      | PRDX3        | 0.069  | 0.895 | -0.309 | 0.427 | -0.100 | 0.707 | -0.400 | 0.043 |
| OLIGO_06833 | AW463054      | LOC553158    | -0.383 | 0.239 | -0.311 | 0.377 | 0.846  | 0.208 | -0.074 | 0.762 |
| OLIGO_06837 | AW464354      | RPL10        | -0.057 | 0.695 | -0.126 | 0.760 | 0.460  | 0.240 | -0.115 | 0.572 |
| OLIGO_06841 | BF043760      | HNRPA0       | -0.350 | 0.027 | -0.496 | 0.173 | -0.243 | 0.390 | -0.466 | 0.037 |
| OLIGO_06843 | AW463539      | LOC546078    | -0.033 | 0.828 | 0.095  | 0.561 | 0.169  | 0.487 | 0.427  | 0.158 |
| OLIGO_06847 | AW463740      | USP11        | -0.176 | 0.208 | 0.116  | 0.587 | -0.440 | 0.125 | -0.167 | 0.427 |
| OLIGO_06850 | AW461378      | CUGBP1       | -0.023 | 0.891 | 0.090  | 0.747 | 0.052  | 0.722 | -0.209 | 0.128 |
| OLIGO_06853 | BF046219      | SNRPD2       | -0.009 | 0.966 | -0.105 | 0.665 | 0.111  | 0.624 | -0.425 | 0.002 |
| OLIGO_06854 | AW465708      | ACIN1        | -0.090 | 0.662 | -0.278 | 0.462 | 0.079  | 0.623 | 0.042  | 0.841 |
| OLIGO_06856 | AW461932      | PHLDA1       | 0.107  | 0.710 | -0.206 | 0.429 | -0.590 | 0.072 | 0.631  | 0.006 |
| OLIGO_06860 | BM362216      | ATOX1        | -0.183 | 0.286 | -0.186 | 0.542 | -0.335 | 0.296 | -0.233 | 0.218 |
| OLIGO_06864 | BF043310      | Pafah1b2     | -0.244 | 0.163 | 0.035  | 0.869 | -0.271 | 0.176 | 0.126  | 0.365 |
| OLIGO_06865 | AW462319      | ATP5H        | 0.015  | 0.915 | -0.155 | 0.521 | -0.119 | 0.518 | -0.353 | 0.018 |
| OLIGO_06867 | AW466020      | CTSF         | -0.058 | 0.599 | -0.079 | 0.837 | -0.034 | 0.871 | 0.096  | 0.623 |
| OLIGO_06868 | AW464712      | VDAC3        | -0.053 | 0.781 | -0.131 | 0.707 | 0.383  | 0.370 | -0.516 | 0.013 |
| OLIGO_06872 | AW463595      | NEK7         | 0.211  | 0.447 | -0.083 | 0.783 | 0.385  | 0.230 | 0.243  | 0.200 |
| OLIGO_06876 | AW466147      | ANXA2        | 0.431  | 0.050 | -0.583 | 0.148 | 0.067  | 0.795 | 0.086  | 0.721 |



|             |               |           |        |       |        |       |        |       |        |       |
|-------------|---------------|-----------|--------|-------|--------|-------|--------|-------|--------|-------|
| OLIGO_06877 | AW465971      | SEPP1     | 0.190  | 0.529 | -0.010 | 0.986 | 0.792  | 0.249 | 1.048  | 0.003 |
| OLIGO_06882 | BF042525      | SPTBN1    | -0.153 | 0.703 | -0.661 | 0.056 | -0.466 | 0.217 | 0.402  | 0.065 |
| OLIGO_06884 | BF440234      | CLK1      | 0.138  | 0.357 | -0.296 | 0.339 | -0.359 | 0.037 | 0.228  | 0.349 |
| OLIGO_06885 | AW461949      | SF3B3     | 0.028  | 0.750 | 0.058  | 0.805 | -0.175 | 0.235 | -0.300 | 0.050 |
| OLIGO_06889 | BM362349      | NDUFA2    | -0.075 | 0.600 | -0.067 | 0.786 | -0.209 | 0.123 | -0.470 | 0.010 |
| OLIGO_06891 | BF440190      | RPL17     | -0.032 | 0.897 | -0.009 | 0.979 | 0.184  | 0.516 | -0.303 | 0.243 |
| OLIGO_06896 | AW466163      | SSR3      | 0.131  | 0.423 | -0.046 | 0.848 | -0.240 | 0.423 | 0.020  | 0.913 |
| OLIGO_06901 | AW462807      | OACT2     | -0.150 | 0.343 | -0.284 | 0.353 | -0.181 | 0.497 | -0.346 | 0.115 |
| OLIGO_06902 | AW462073      | PSMC1     | 0.028  | 0.828 | -0.238 | 0.242 | -0.166 | 0.627 | -0.680 | 0.000 |
| OLIGO_06905 | BF043177      | ZNF9      | 0.295  | 0.186 | 0.768  | 0.176 | -0.054 | 0.880 | 0.394  | 0.121 |
| OLIGO_06906 | AW463130      | KRIT1     | 0.163  | 0.267 | 0.591  | 0.167 | 0.265  | 0.292 | -0.059 | 0.800 |
| OLIGO_06910 | AW461877      | CACYBP    | 0.128  | 0.458 | 0.062  | 0.804 | -0.434 | 0.090 | -0.355 | 0.161 |
| OLIGO_06911 | AW462209      | ARHGEF1   | -0.368 | 0.269 | 0.508  | 0.256 | 0.494  | 0.176 | 0.085  | 0.691 |
| OLIGO_06912 | BF040878      | EIF4A2    | 0.139  | 0.411 | -0.323 | 0.397 | -0.500 | 0.179 | -0.143 | 0.553 |
| OLIGO_06918 | BF044326      | MRPL20    | -0.181 | 0.380 | 0.251  | 0.414 | 0.382  | 0.131 | -0.316 | 0.095 |
| OLIGO_06919 | AW462239      | DOPEY2    | -0.270 | 0.266 | -0.146 | 0.703 | -0.209 | 0.617 | -0.109 | 0.710 |
| OLIGO_06925 | BF039548      | NUP205    | 0.082  | 0.494 | -0.194 | 0.395 | -0.310 | 0.117 | -0.488 | 0.002 |
| OLIGO_06930 | AW462092      | PTGS2     | 0.280  | 0.531 | -0.219 | 0.683 | 1.504  | 0.167 | 2.359  | 0.001 |
| OLIGO_06931 | AW464007      | PRR13     | -0.167 | 0.514 | -0.077 | 0.865 | 0.630  | 0.015 | -0.220 | 0.447 |
| OLIGO_06933 | BF042534      | DUSP12    | -0.093 | 0.438 | -0.095 | 0.764 | -0.021 | 0.934 | -0.383 | 0.057 |
| OLIGO_06937 | BF040539      | MADD      | -0.156 | 0.510 | 0.098  | 0.545 | -0.100 | 0.610 | 0.247  | 0.309 |
| OLIGO_06942 | BF041001      | DRAP1     | 0.007  | 0.957 | 0.002  | 0.993 | -0.225 | 0.393 | -0.057 | 0.760 |
| OLIGO_06943 | BM366972      | SF3B5     | -0.178 | 0.477 | -0.094 | 0.713 | -0.312 | 0.326 | -0.453 | 0.035 |
| OLIGO_06944 | AW462161      | PITPNB    | -0.101 | 0.389 | 0.093  | 0.482 | 0.110  | 0.492 | 0.470  | 0.044 |
| OLIGO_06949 | AW465305      | PCBP1     | 0.201  | 0.155 | 0.011  | 0.981 | 0.030  | 0.943 | -0.575 | 0.007 |
| OLIGO_06970 | BF046180      | COX4NB    | -0.126 | 0.848 | -0.365 | 0.236 | -0.275 | 0.141 | -0.107 | 0.637 |
| OLIGO_06971 | BF043452      | GEFT      | -0.075 | 0.629 | -0.152 | 0.477 | -0.255 | 0.195 | -0.460 | 0.044 |
| OLIGO_06973 | AW462205      | KIAA0319L | 0.096  | 0.436 | 0.163  | 0.620 | 0.029  | 0.886 | -0.259 | 0.077 |
| OLIGO_06974 | BF041607      | MRFAP1    | -0.057 | 0.702 | 0.332  | 0.333 | 0.587  | 0.047 | 0.338  | 0.154 |
| OLIGO_06975 | BF045512      | STX8      | 0.082  | 0.682 | 0.006  | 0.990 | -0.083 | 0.780 | -0.544 | 0.037 |
| OLIGO_06982 | AW461667      | RBX1      | 0.168  | 0.283 | 0.074  | 0.745 | -0.464 | 0.009 | -0.096 | 0.398 |
| OLIGO_06984 | AW462245      | ZNF143    | -0.072 | 0.639 | -0.310 | 0.491 | 0.692  | 0.037 | -0.259 | 0.361 |
| OLIGO_06992 | AW465246      | YME1L1    | 0.160  | 0.368 | -0.089 | 0.769 | -0.064 | 0.751 | -0.543 | 0.025 |
| OLIGO_06999 | AW462724      | NPM1      | 0.098  | 0.786 | -0.165 | 0.661 | -0.049 | 0.885 | -0.753 | 0.003 |
| OLIGO_07000 | BF042245      | ZNF598    | -0.926 | 0.185 | 0.261  | 0.575 | 0.283  | 0.415 | -0.698 | 0.052 |
| OLIGO_07001 | AW463933      | AES       | -0.009 | 0.956 | 0.327  | 0.291 | -0.196 | 0.474 | 0.343  | 0.119 |
| OLIGO_07003 | BF046670      | APPBP2    | -0.363 | 0.243 | 0.290  | 0.487 | -0.067 | 0.767 | 0.117  | 0.504 |
| OLIGO_07010 | AW462162      | FKSG24    | -0.217 | 0.290 | 0.061  | 0.896 | 0.345  | 0.321 | -0.447 | 0.144 |
| OLIGO_07012 | AW465404      | HMG2      | -0.041 | 0.926 | -0.096 | 0.738 | -0.678 | 0.147 | -0.780 | 0.000 |
| OLIGO_07016 | BF044396      | IDH2      | -0.279 | 0.232 | -0.059 | 0.869 | -0.107 | 0.447 | 0.072  | 0.630 |
| OLIGO_07018 | BM362530      | RPL30     | 0.068  | 0.685 | -0.078 | 0.833 | -0.237 | 0.558 | -0.435 | 0.085 |
| OLIGO_07019 | AW462172      | ARSB      | -0.348 | 0.283 | -0.168 | 0.744 | 0.027  | 0.941 | -0.022 | 0.918 |
| OLIGO_07027 | BF039581      | LOC644799 | 0.095  | 0.623 | 0.045  | 0.864 | -0.142 | 0.567 | 0.039  | 0.785 |
| OLIGO_07029 | BF046515      | EBP       | -0.288 | 0.321 | -0.023 | 0.916 | 0.059  | 0.703 | -0.138 | 0.310 |
| OLIGO_07032 | BF045056      | PTD008    | -0.138 | 0.601 | -0.083 | 0.643 | 0.057  | 0.638 | -0.447 | 0.015 |
| OLIGO_07037 | AW464165      | BAT1      | -0.167 | 0.439 | -0.402 | 0.179 | 0.315  | 0.153 | 0.025  | 0.880 |
| OLIGO_07040 | AW461836      | RNF5      | -0.240 | 0.134 | 0.282  | 0.102 | 0.087  | 0.750 | 0.014  | 0.932 |
| OLIGO_07042 | BF046598      | BRD4      | -0.249 | 0.198 | -0.030 | 0.883 | -0.122 | 0.520 | -0.218 | 0.137 |
| OLIGO_07043 | BM365949      | SEPX1     | -0.167 | 0.623 | -0.178 | 0.201 | -0.409 | 0.149 | 0.069  | 0.525 |
| OLIGO_07044 | AW462206      | ASRGL1    | 0.426  | 0.127 | -0.297 | 0.254 | 0.530  | 0.143 | -0.164 | 0.503 |
| OLIGO_07045 | BP22000600403 | C20orf149 | 0.031  | 0.839 | -0.016 | 0.956 | -0.183 | 0.444 | 0.053  | 0.809 |
| OLIGO_07046 | AW465466      | GNG5      | 0.111  | 0.471 | 0.065  | 0.800 | 0.051  | 0.771 | -0.296 | 0.084 |
| OLIGO_07048 | AW462665      | TARBP2    | 0.136  | 0.508 | 0.066  | 0.732 | 0.020  | 0.880 | -0.144 | 0.392 |
| OLIGO_07049 | BF039382      | COX8A     | 0.092  | 0.701 | -0.489 | 0.052 | -0.061 | 0.703 | 0.020  | 0.922 |
| OLIGO_07050 | BF044078      | NAV2      | -0.525 | 0.074 | -0.170 | 0.520 | 0.616  | 0.247 | 0.034  | 0.859 |
| OLIGO_07052 | AW464185      | GNAI1     | -0.022 | 0.827 | -0.052 | 0.853 | 0.311  | 0.377 | 0.361  | 0.069 |
| OLIGO_07056 | AW464635      | ATP6V1G1  | 0.022  | 0.888 | -0.128 | 0.707 | 0.258  | 0.219 | 0.080  | 0.681 |
| OLIGO_07057 | AW463898      | HSP90B1   | -0.033 | 0.862 | -0.053 | 0.782 | 0.103  | 0.616 | 0.327  | 0.067 |
| OLIGO_07060 | BM364483      | USP3      | -0.082 | 0.686 | -0.181 | 0.437 | -0.191 | 0.363 | -0.060 | 0.693 |
| OLIGO_07062 | BF044693      | FIS1      | 0.189  | 0.498 | 0.244  | 0.649 | 0.520  | 0.167 | 0.297  | 0.342 |

|             |          |          |        |       |        |       |        |       |        |       |
|-------------|----------|----------|--------|-------|--------|-------|--------|-------|--------|-------|
| OLIGO_07063 | AW462094 | FUT6     | -0.420 | 0.340 | 0.042  | 0.950 | -0.203 | 0.696 | 0.060  | 0.866 |
| OLIGO_07068 | BF039787 | KIAA0082 | 0.116  | 0.467 | 0.425  | 0.050 | 0.011  | 0.952 | 0.096  | 0.602 |
| OLIGO_07071 | AW465735 | SIKE     | 0.380  | 0.049 | -0.527 | 0.048 | 0.219  | 0.348 | -0.891 | 0.010 |
| OLIGO_07074 | BF046197 | KIAA0913 | 0.173  | 0.305 | 0.046  | 0.882 | -0.223 | 0.246 | 0.118  | 0.354 |
| OLIGO_07090 | BF043328 | PRMT7    | 0.174  | 0.218 | 0.071  | 0.818 | 0.119  | 0.544 | -0.031 | 0.889 |
| OLIGO_07093 | BF039172 | SUPT5H   | -0.230 | 0.352 | -0.121 | 0.526 | -0.104 | 0.501 | -0.962 | 0.428 |
| OLIGO_07098 | BF042714 | TMED1    | 0.202  | 0.491 | 0.309  | 0.207 | 0.289  | 0.244 | 0.060  | 0.666 |
| OLIGO_07107 | AW466055 | ATP5B    | 0.024  | 0.950 | -0.220 | 0.462 | -0.055 | 0.861 | -0.310 | 0.139 |
| OLIGO_07114 | BF039861 | DONSON   | -0.040 | 0.839 | -0.230 | 0.397 | -0.186 | 0.280 | -0.443 | 0.003 |
| OLIGO_07115 | AW461388 | WEE1     | -0.041 | 0.829 | -0.028 | 0.914 | 0.063  | 0.768 | -0.001 | 0.998 |
| OLIGO_07116 | AW461395 | TSPAN1   | -0.364 | 0.215 | -0.123 | 0.768 | 0.860  | 0.322 | -0.002 | 0.993 |
| OLIGO_07127 | BF042039 | HSPA14   | -0.124 | 0.340 | -0.208 | 0.388 | -0.146 | 0.338 | -0.167 | 0.285 |
| OLIGO_07128 | AW463787 | SERTAD3  | 0.164  | 0.388 | 0.729  | 0.282 | -0.735 | 0.254 | -0.149 | 0.567 |
| OLIGO_07130 | AW462510 | SIAH2    | 0.084  | 0.542 | 0.061  | 0.774 | -0.166 | 0.493 | -0.692 | 0.002 |
| OLIGO_07131 | BF042973 | CCDC23   | 0.159  | 0.607 | -0.265 | 0.418 | -0.240 | 0.328 | -0.798 | 0.007 |
| OLIGO_07133 | AW463160 | BAZ1B    | -0.055 | 0.636 | -0.075 | 0.762 | -0.013 | 0.957 | -0.186 | 0.113 |
| OLIGO_07135 | AW465233 | COX4I1   | -0.091 | 0.415 | 0.065  | 0.889 | -0.184 | 0.511 | -0.225 | 0.322 |
| OLIGO_07140 | BF039949 | ATPIF1   | -0.021 | 0.884 | -0.127 | 0.692 | -0.010 | 0.964 | -0.577 | 0.024 |
| OLIGO_07141 | AW465571 | MALAT1   | -0.111 | 0.540 | -0.066 | 0.815 | 0.272  | 0.434 | -0.292 | 0.258 |
| OLIGO_07143 | AW463319 | HMGCR    | 0.192  | 0.446 | -0.108 | 0.524 | -0.199 | 0.343 | -0.174 | 0.236 |
| OLIGO_07150 | AW464121 | ATP6V1E1 | 0.257  | 0.158 | -0.482 | 0.120 | 0.105  | 0.723 | 0.353  | 0.197 |
| OLIGO_07153 | AW464540 | IGFBP6   | -0.042 | 0.819 | 0.098  | 0.632 | -0.217 | 0.484 | -0.162 | 0.398 |
| OLIGO_07155 | AW462370 | MGC23909 | -0.179 | 0.456 | -0.173 | 0.659 | -0.086 | 0.791 | -0.527 | 0.033 |
| OLIGO_07162 | AW463812 | CAT      | -0.056 | 0.694 | 0.044  | 0.756 | -0.097 | 0.431 | -0.323 | 0.037 |
| OLIGO_07164 | BF040853 | CST6     | -0.377 | 0.261 | 0.268  | 0.347 | -0.260 | 0.222 | -0.186 | 0.205 |
| OLIGO_07165 | BF044010 | MFAP4    | 0.059  | 0.839 | 0.142  | 0.680 | -0.037 | 0.850 | -0.105 | 0.594 |
| OLIGO_07173 | BF039677 | PSMD7    | 0.208  | 0.140 | 0.293  | 0.349 | 0.051  | 0.716 | -0.538 | 0.021 |
| OLIGO_07174 | BF039863 | CDCA8    | 0.347  | 0.284 | -0.591 | 0.037 | -0.198 | 0.270 | -0.772 | 0.000 |
| OLIGO_07176 | AW462170 | RHEB     | -0.017 | 0.927 | 0.150  | 0.601 | -0.369 | 0.119 | -0.136 | 0.417 |
| OLIGO_07183 | AW462122 | CCM2     | -0.261 | 0.775 | 0.000  | 0.999 | 0.050  | 0.875 | -0.188 | 0.306 |
| OLIGO_07187 | BF045365 | TJP2     | 0.087  | 0.770 | 0.546  | 0.265 | -0.179 | 0.379 | 0.367  | 0.111 |
| OLIGO_07190 | BM365231 | GYPC     | -0.173 | 0.458 | -0.094 | 0.704 | 0.005  | 0.982 | -0.476 | 0.018 |
| OLIGO_07191 | AW462800 | PROS1    | 0.381  | 0.303 | 0.286  | 0.576 | 0.665  | 0.417 | -0.053 | 0.820 |
| OLIGO_07192 | AW462585 | DGKA     | -0.116 | 0.633 | 0.743  | 0.079 | 0.469  | 0.148 | 0.274  | 0.198 |
| OLIGO_07193 | BF046028 | EIF3S2   | -0.040 | 0.880 | 0.590  | 0.082 | 0.091  | 0.574 | -0.363 | 0.180 |
| OLIGO_07196 | AW462924 | RAB1A    | 0.445  | 0.079 | 0.712  | 0.208 | 0.490  | 0.127 | 0.365  | 0.139 |
| OLIGO_07198 | AW464829 | HDAC2    | 0.339  | 0.051 | 0.245  | 0.658 | -0.396 | 0.256 | -0.087 | 0.754 |
| OLIGO_07199 | AW461790 | UBE2R2   | -0.018 | 0.925 | 0.184  | 0.560 | -0.015 | 0.946 | 0.226  | 0.199 |
| OLIGO_07201 | BF039322 | ZBTB8OS  | 0.073  | 0.641 | -0.250 | 0.349 | -0.121 | 0.745 | -0.399 | 0.104 |
| OLIGO_07204 | AW462462 | CREBL1   | 0.092  | 0.340 | 0.581  | 0.120 | 0.192  | 0.361 | 0.156  | 0.284 |
| OLIGO_07207 | AW462134 | CXCL14   | -0.364 | 0.258 | 0.436  | 0.201 | -0.360 | 0.519 | 0.800  | 0.101 |
| OLIGO_07211 | BF044816 | SFRS6    | 0.305  | 0.102 | 0.080  | 0.814 | -0.124 | 0.660 | 0.087  | 0.610 |
| OLIGO_07212 | BF040414 | CHP      | 0.206  | 0.301 | -0.145 | 0.543 | -0.105 | 0.689 | -0.737 | 0.001 |
| OLIGO_07219 | BF044875 | FBLN5    | -0.192 | 0.166 | 0.590  | 0.187 | -0.097 | 0.822 | 0.026  | 0.932 |
| OLIGO_07222 | AW464300 | SLC11A2  | 0.172  | 0.549 | -0.109 | 0.703 | 0.294  | 0.309 | -0.078 | 0.643 |
| OLIGO_07223 | AW462514 | GSPT1    | 0.045  | 0.772 | -0.149 | 0.634 | 0.473  | 0.213 | -0.526 | 0.082 |
| OLIGO_07224 | BF440341 | IFIT5    | -0.339 | 0.272 | 0.065  | 0.814 | -0.112 | 0.553 | -0.011 | 0.959 |
| OLIGO_07227 | AW464979 | ST13     | 0.123  | 0.661 | -0.176 | 0.515 | -0.217 | 0.213 | -0.171 | 0.405 |
| OLIGO_07229 | AW462364 | DIAPH1   | -0.501 | 0.105 | 0.204  | 0.448 | 0.121  | 0.402 | 0.505  | 0.022 |
| OLIGO_07236 | AW461369 | SAR1A    | 0.084  | 0.646 | -0.059 | 0.851 | 0.076  | 0.740 | 0.190  | 0.209 |
| OLIGO_07237 | AW462385 | STX1A    | -0.225 | 0.270 | -0.110 | 0.537 | -0.190 | 0.329 | -0.481 | 0.126 |
| OLIGO_07239 | BF040273 | PDE9A    | -0.026 | 0.889 | 0.255  | 0.288 | -0.007 | 0.972 | 0.018  | 0.908 |
| OLIGO_07240 | AW462757 | ZNF207   | 0.192  | 0.226 | -0.357 | 0.261 | -0.009 | 0.960 | 0.087  | 0.590 |
| OLIGO_07242 | AW462397 | KIAA1012 | -0.023 | 0.886 | -0.172 | 0.497 | 0.226  | 0.164 | 0.187  | 0.286 |
| OLIGO_07245 | BF045581 | TCEA1    | 0.132  | 0.276 | 0.131  | 0.632 | -0.122 | 0.576 | -0.041 | 0.766 |
| OLIGO_07246 | AW464174 | DDX21    | 0.458  | 0.010 | -0.367 | 0.097 | -0.255 | 0.213 | -0.126 | 0.485 |
| OLIGO_07250 | BF040380 | SSU72    | -0.185 | 0.254 | -0.162 | 0.673 | -0.370 | 0.108 | -0.346 | 0.115 |
| OLIGO_07251 | BF043734 | MTMR4    | -0.327 | 0.057 | -0.041 | 0.900 | -0.020 | 0.929 | -0.390 | 0.046 |
| OLIGO_07252 | AW461482 | LRP10    | 0.018  | 0.896 | -0.141 | 0.391 | 0.051  | 0.718 | 0.059  | 0.678 |
| OLIGO_07254 | BF044765 | SNW1     | -0.063 | 0.641 | -0.125 | 0.421 | 0.153  | 0.388 | 0.002  | 0.987 |

|             |               |           |        |       |        |       |        |       |        |       |
|-------------|---------------|-----------|--------|-------|--------|-------|--------|-------|--------|-------|
| OLIGO_07256 | AW462578      | PANK4     | -0.115 | 0.445 | -0.090 | 0.654 | -0.018 | 0.938 | -0.480 | 0.001 |
| OLIGO_07258 | BF045237      | DFFB      | -0.003 | 0.986 | 0.034  | 0.907 | 0.191  | 0.549 | -0.192 | 0.236 |
| OLIGO_07265 | BF440279      | EIF1B     | -0.011 | 0.934 | -0.495 | 0.048 | -0.154 | 0.338 | 0.047  | 0.767 |
| OLIGO_07267 | AW465909      | HSPA9B    | 0.224  | 0.399 | -0.087 | 0.871 | 0.130  | 0.743 | 0.053  | 0.845 |
| OLIGO_07270 | BM362027      | GTF2H5    | 0.103  | 0.582 | -0.603 | 0.055 | -0.182 | 0.355 | 0.349  | 0.049 |
| OLIGO_07272 | BF041753      | HSPD1     | 0.103  | 0.578 | -0.182 | 0.575 | 0.197  | 0.452 | -0.860 | 0.002 |
| OLIGO_07280 | BF040000      | APEX1     | 0.077  | 0.494 | 0.132  | 0.665 | -0.519 | 0.185 | -0.422 | 0.013 |
| OLIGO_07281 | AW464468      | FTHL7     | 0.213  | 0.196 | -0.007 | 0.979 | -0.165 | 0.395 | -0.753 | 0.008 |
| OLIGO_07282 | AW461380      | TA-NFKBH  | 0.465  | 0.181 | -0.187 | 0.523 | -0.220 | 0.182 | -0.461 | 0.044 |
| OLIGO_07283 | AW462354      | PACSIN2   | 0.314  | 0.226 | 0.529  | 0.241 | 0.058  | 0.875 | -0.030 | 0.880 |
| OLIGO_07285 | BM362648      | RPL5      | 0.042  | 0.868 | -0.521 | 0.318 | 0.186  | 0.709 | -0.744 | 0.032 |
| OLIGO_07289 | AW462527      | PLB1      | 0.039  | 0.822 | 0.449  | 0.288 | 0.377  | 0.166 | 0.071  | 0.695 |
| OLIGO_07291 | BM362984      | GPAA1     | 0.046  | 0.759 | 0.683  | 0.188 | 0.712  | 0.227 | -0.021 | 0.942 |
| OLIGO_07297 | BF041227      | KDEL2     | 0.112  | 0.319 | -0.383 | 0.291 | 0.020  | 0.960 | -0.328 | 0.106 |
| OLIGO_07306 | AW462410      | FZD5      | 1.303  | 0.015 | -0.185 | 0.554 | 0.090  | 0.649 | 0.040  | 0.788 |
| OLIGO_07307 | BF044643      | LOC533209 | -0.158 | 0.475 | 0.270  | 0.390 | -0.252 | 0.328 | 0.057  | 0.777 |
| OLIGO_07312 | BF046475      | MRPL51    | 0.165  | 0.118 | -0.002 | 0.992 | -0.106 | 0.710 | -0.360 | 0.063 |
| OLIGO_07313 | BF041390      | GPR172B   | -0.186 | 0.254 | 0.295  | 0.152 | 0.362  | 0.036 | -0.110 | 0.457 |
| OLIGO_07314 | BF040412      | ABHD14B   | -0.081 | 0.642 | 0.338  | 0.109 | 0.382  | 0.030 | -0.195 | 0.332 |
| OLIGO_07315 | BM361903      | RARRES2   | -0.067 | 0.655 | 0.252  | 0.297 | -0.036 | 0.812 | 0.060  | 0.690 |
| OLIGO_07316 | BM366355      | CHRAC1    | 0.017  | 0.883 | 0.039  | 0.907 | -0.050 | 0.823 | -0.255 | 0.256 |
| OLIGO_07321 | BM365566      | C20orf29  | 0.543  | 0.092 | -0.391 | 0.154 | 0.297  | 0.339 | -0.261 | 0.121 |
| OLIGO_07322 | BF039258      | FN3KRP    | -0.162 | 0.208 | -0.286 | 0.342 | -0.255 | 0.215 | -0.628 | 0.002 |
| OLIGO_07325 | AW462601      | EFNA4     | 0.054  | 0.637 | 0.243  | 0.207 | 0.001  | 0.997 | 0.114  | 0.427 |
| OLIGO_07326 | BM363942      | VAMP2     | -0.003 | 0.987 | 0.199  | 0.325 | -0.006 | 0.965 | -0.122 | 0.432 |
| OLIGO_07329 | BM366885      | DRG1      | 0.117  | 0.506 | -0.148 | 0.698 | 0.174  | 0.540 | 0.015  | 0.932 |
| OLIGO_07334 | AW462220      | RANBP1    | -0.101 | 0.398 | -0.190 | 0.585 | 0.348  | 0.237 | -0.585 | 0.004 |
| OLIGO_07336 | BM362423      | FDPS      | 0.110  | 0.530 | 0.155  | 0.568 | 0.475  | 0.030 | 0.254  | 0.104 |
| OLIGO_07337 | BM364502      | NDUFS5    | -0.018 | 0.883 | -0.477 | 0.193 | -0.024 | 0.930 | -0.322 | 0.142 |
| OLIGO_07338 | BF046386      | FAM100B   | 0.063  | 0.626 | 0.120  | 0.650 | 0.303  | 0.243 | 0.155  | 0.328 |
| OLIGO_07339 | BF040255      | C16orf56  | -0.174 | 0.146 | -0.284 | 0.515 | -0.245 | 0.378 | -0.614 | 0.008 |
| OLIGO_07341 | BF043710      | BCAR3     | -0.039 | 0.806 | 0.101  | 0.783 | -0.275 | 0.365 | -0.689 | 0.038 |
| OLIGO_07342 | BF040432      | CCT8      | 0.108  | 0.594 | 0.666  | 0.127 | 0.314  | 0.343 | 0.540  | 0.065 |
| OLIGO_07347 | AW462466      | SOD1      | -0.091 | 0.677 | -0.008 | 0.979 | -0.207 | 0.592 | -1.133 | 0.001 |
| OLIGO_07348 | BM366146      | KIAA0141  | -0.153 | 0.473 | -0.271 | 0.480 | -0.334 | 0.207 | 0.270  | 0.236 |
| OLIGO_07349 | BF046164      | MFHAS1    | -0.415 | 0.131 | 0.275  | 0.568 | -0.260 | 0.581 | 0.025  | 0.857 |
| OLIGO_07351 | BF440247      | GOPC      | -0.027 | 0.874 | -0.210 | 0.454 | 0.068  | 0.783 | 0.042  | 0.897 |
| OLIGO_07362 | BF043955      | CDC26     | 0.115  | 0.260 | -0.157 | 0.290 | -0.656 | 0.089 | -0.255 | 0.282 |
| OLIGO_07369 | BF046279      | MAGED2    | -0.047 | 0.786 | -0.023 | 0.955 | 0.047  | 0.850 | -0.356 | 0.074 |
| OLIGO_07370 | BM365495      | M6PRBP1   | 0.134  | 0.455 | 0.131  | 0.740 | -0.315 | 0.532 | -0.445 | 0.207 |
| OLIGO_07373 | BM362775      | ECRG4     | -0.316 | 0.337 | -0.309 | 0.510 | -0.963 | 0.013 | -0.950 | 0.006 |
| OLIGO_07375 | BF440439      | RPL4      | -0.083 | 0.601 | -0.083 | 0.806 | -0.353 | 0.197 | -0.569 | 0.023 |
| OLIGO_07379 | AW465458      | C1orf54   | 0.144  | 0.540 | 0.402  | 0.267 | -0.072 | 0.842 | 0.357  | 0.200 |
| OLIGO_07380 | AW465165      | FNTA      | -0.191 | 0.406 | -0.492 | 0.143 | -0.387 | 0.146 | -0.111 | 0.574 |
| OLIGO_07382 | AW462383      | ATP6AP2   | -0.053 | 0.904 | -0.278 | 0.441 | -0.025 | 0.935 | -0.462 | 0.076 |
| OLIGO_07383 | BM366855      | DCPS      | 0.375  | 0.186 | 0.638  | 0.156 | -0.132 | 0.509 | -0.220 | 0.331 |
| OLIGO_07387 | AW465223      | PPP2R1A   | 0.057  | 0.740 | 0.647  | 0.090 | -0.130 | 0.700 | -0.046 | 0.776 |
| OLIGO_07389 | AW462343      | NDUFS8    | 0.240  | 0.101 | 0.116  | 0.391 | -0.066 | 0.590 | -0.336 | 0.048 |
| OLIGO_07391 | AW463476      | VTI1B     | 0.265  | 0.244 | -0.045 | 0.897 | 0.538  | 0.236 | -0.590 | 0.040 |
| OLIGO_07394 | AW465148      | GAS2L1    | -0.146 | 0.372 | 0.233  | 0.612 | 0.120  | 0.620 | -0.165 | 0.478 |
| OLIGO_07406 | AW462820      | AHCY      | 0.148  | 0.715 | -0.262 | 0.551 | 0.065  | 0.825 | -0.610 | 0.002 |
| OLIGO_07407 | AW463737      | XYLT2     | -0.133 | 0.510 | 0.645  | 0.104 | -0.557 | 0.126 | -0.036 | 0.831 |
| OLIGO_07408 | AW464856      | H2AFV     | 0.050  | 0.782 | 0.115  | 0.585 | -0.344 | 0.346 | -0.530 | 0.013 |
| OLIGO_07409 | BF041978      | ZNF38     | -0.163 | 0.415 | 0.447  | 0.057 | 0.205  | 0.160 | 0.554  | 0.013 |
| OLIGO_07411 | AW462580      | CCDC49    | -0.082 | 0.555 | 0.410  | 0.051 | -0.241 | 0.115 | -0.155 | 0.347 |
| OLIGO_07412 | BF045933      | UBL5      | -0.145 | 0.399 | 0.180  | 0.556 | 0.085  | 0.695 | -0.028 | 0.870 |
| OLIGO_07414 | BF044937      | ENSA      | 0.039  | 0.815 | 0.018  | 0.957 | -0.342 | 0.277 | -0.257 | 0.202 |
| OLIGO_07416 | BM362278      | POLB      | 0.055  | 0.732 | 0.144  | 0.628 | -0.113 | 0.687 | -0.512 | 0.035 |
| OLIGO_07422 | AW465187      | C6orf111  | -0.126 | 0.303 | 0.253  | 0.676 | -0.201 | 0.133 | -0.095 | 0.534 |
| OLIGO_07428 | BS29000103003 | PLK3      | -0.105 | 0.508 | -0.212 | 0.583 | -0.008 | 0.966 | -0.003 | 0.990 |

|             |          |           |        |       |        |       |        |       |        |       |
|-------------|----------|-----------|--------|-------|--------|-------|--------|-------|--------|-------|
| OLIGO_07429 | AW462591 | ARMC1     | -0.154 | 0.488 | -0.038 | 0.886 | -0.211 | 0.330 | -0.293 | 0.070 |
| OLIGO_07439 | BF039193 | NEB       | -0.152 | 0.468 | 0.532  | 0.224 | -0.513 | 0.318 | 0.058  | 0.843 |
| OLIGO_07441 | AW462645 | 40436     | 0.022  | 0.942 | 0.000  | 1.000 | 0.298  | 0.221 | -0.039 | 0.852 |
| OLIGO_07442 | AW462060 | MED31     | -0.262 | 0.103 | 0.028  | 0.908 | -0.139 | 0.359 | -0.169 | 0.324 |
| OLIGO_07444 | AW462623 | GRPEL2    | 0.037  | 0.778 | -0.278 | 0.295 | 0.148  | 0.500 | -0.033 | 0.861 |
| OLIGO_07451 | BM362899 | KIAA0690  | 0.421  | 0.012 | -0.387 | 0.172 | 0.517  | 0.069 | -0.543 | 0.011 |
| OLIGO_07452 | AW463065 | HSA277841 | 0.085  | 0.536 | 0.151  | 0.771 | 0.294  | 0.412 | -0.375 | 0.160 |
| OLIGO_07455 | AW463093 | IPO8      | 0.190  | 0.268 | -0.307 | 0.145 | -0.172 | 0.313 | 0.095  | 0.549 |
| OLIGO_07458 | BF440369 | 40428     | 0.035  | 0.873 | -0.546 | 0.098 | -0.041 | 0.901 | 0.124  | 0.637 |
| OLIGO_07464 | BF042405 | MGC16028  | -0.104 | 0.483 | -0.055 | 0.740 | -0.120 | 0.509 | -0.751 | 0.025 |
| OLIGO_07473 | AW461341 | MTCP1     | 0.040  | 0.847 | 0.123  | 0.624 | -0.104 | 0.632 | -0.246 | 0.215 |
| OLIGO_07474 | AW462334 | IBRDC3    | -0.091 | 0.664 | 0.809  | 0.024 | 0.106  | 0.544 | 0.960  | 0.011 |
| OLIGO_07477 | BF040587 | ESRRA     | 0.010  | 0.968 | -0.002 | 0.997 | 0.838  | 0.051 | -0.378 | 0.024 |
| OLIGO_07479 | AW465073 | CHCHD2    | 0.166  | 0.320 | 0.757  | 0.036 | 0.149  | 0.253 | 0.576  | 0.015 |
| OLIGO_07480 | AW461991 | C1orf144  | -0.149 | 0.601 | 0.577  | 0.076 | 0.211  | 0.235 | 0.233  | 0.238 |
| OLIGO_07482 | AW462072 | RNF130    | 0.004  | 0.979 | 0.764  | 0.091 | -0.604 | 0.171 | 0.274  | 0.262 |
| OLIGO_07483 | BM366740 | BAG2      | 0.209  | 0.340 | 0.339  | 0.462 | 0.288  | 0.284 | 0.051  | 0.757 |
| OLIGO_07486 | BF040398 | BTBD6     | -0.024 | 0.931 | -0.082 | 0.745 | -0.301 | 0.264 | -0.299 | 0.181 |
| OLIGO_07488 | BM365128 | H2AFY     | -0.013 | 0.937 | 0.013  | 0.965 | -0.530 | 0.159 | -0.381 | 0.062 |
| OLIGO_07489 | AW462344 | PDXP      | -0.049 | 0.797 | 0.035  | 0.912 | 0.098  | 0.799 | -0.268 | 0.174 |
| OLIGO_07497 | AW466110 | EWSR1     | -0.046 | 0.740 | -0.315 | 0.057 | -0.104 | 0.433 | -0.480 | 0.028 |
| OLIGO_07499 | AW462517 | GAA       | -0.055 | 0.739 | -0.090 | 0.881 | 0.919  | 0.059 | 0.315  | 0.341 |
| OLIGO_07500 | BM366911 | ATXN2L    | 0.275  | 0.545 | -0.002 | 0.997 | -0.686 | 0.043 | -0.710 | 0.003 |
| OLIGO_07520 | AW465324 | ZMYM3     | -0.372 | 0.042 | -0.215 | 0.436 | 0.063  | 0.684 | -0.289 | 0.120 |
| OLIGO_07524 | AW462592 | TMEM97    | -0.112 | 0.533 | 0.085  | 0.786 | 0.357  | 0.382 | -0.876 | 0.000 |
| OLIGO_07532 | BF043450 | C1orf123  | -0.023 | 0.850 | -0.256 | 0.152 | 0.107  | 0.591 | -0.051 | 0.726 |
| OLIGO_07534 | BF040392 | AZI2      | -0.290 | 0.089 | 0.109  | 0.508 | 0.295  | 0.125 | 0.356  | 0.055 |
| OLIGO_07540 | BF044279 | C10orf84  | 0.068  | 0.716 | -0.432 | 0.109 | -0.191 | 0.287 | -0.216 | 0.355 |
| OLIGO_07543 | BM365265 | C1R       | -0.170 | 0.513 | -0.277 | 0.293 | -0.344 | 0.082 | 0.295  | 0.166 |
| OLIGO_07544 | AW461361 | EML2      | -0.237 | 0.032 | 0.229  | 0.170 | -0.019 | 0.920 | 0.036  | 0.807 |
| OLIGO_07549 | BF042143 | MAPBPIP   | -0.163 | 0.376 | -0.287 | 0.371 | -0.003 | 0.984 | -0.053 | 0.818 |
| OLIGO_07551 | AW462315 | EPS8L1    | -0.274 | 0.244 | 0.245  | 0.539 | -0.063 | 0.652 | 0.407  | 0.022 |
| OLIGO_07553 | BF040303 | FBXO18    | -0.388 | 0.262 | -0.446 | 0.062 | -0.130 | 0.412 | 0.143  | 0.419 |
| OLIGO_07555 | BM365007 | IHPK1     | -0.119 | 0.434 | -0.017 | 0.926 | -0.357 | 0.083 | -0.043 | 0.787 |
| OLIGO_07561 | AW462518 | AU016693  | -0.219 | 0.154 | 0.220  | 0.476 | -0.039 | 0.825 | -0.162 | 0.391 |
| OLIGO_07562 | AW463924 | NDUFA4L2  | -0.035 | 0.853 | -0.277 | 0.492 | 0.336  | 0.326 | -0.216 | 0.348 |
| OLIGO_07566 | BF041481 | DDX48     | 0.036  | 0.810 | 0.061  | 0.783 | -0.515 | 0.041 | -0.086 | 0.588 |
| OLIGO_07568 | BF044843 | PRKCDBP   | -0.027 | 0.833 | -0.204 | 0.339 | 0.051  | 0.830 | 0.219  | 0.158 |
| OLIGO_07575 | AW462378 | FAM59A    | -0.633 | 0.050 | 0.398  | 0.262 | 0.188  | 0.452 | 0.410  | 0.079 |
| OLIGO_07576 | BM364649 | MRPL30    | 0.134  | 0.413 | 0.302  | 0.327 | -0.019 | 0.915 | -0.355 | 0.099 |
| OLIGO_07591 | AW461365 | LOC408002 | 0.060  | 0.825 | 0.298  | 0.143 | 0.012  | 0.945 | 0.257  | 0.110 |
| OLIGO_07600 | AW462436 | GNG10     | -0.071 | 0.718 | -0.068 | 0.759 | -0.303 | 0.165 | 0.028  | 0.876 |
| OLIGO_07603 | BF042786 | MGC24381  | -0.873 | 0.017 | -0.044 | 0.849 | 0.089  | 0.676 | -0.569 | 0.039 |
| OLIGO_07609 | BM364661 | HSPB8     | -0.064 | 0.716 | -0.120 | 0.668 | -0.790 | 0.055 | 0.050  | 0.833 |
| OLIGO_07611 | AW461371 | WBSCR22   | 0.095  | 0.464 | 0.161  | 0.612 | -0.237 | 0.511 | -0.207 | 0.467 |
| OLIGO_07618 | AW462316 | SHQ1      | 0.296  | 0.243 | 0.020  | 0.953 | -0.169 | 0.320 | 0.166  | 0.439 |
| OLIGO_07625 | AW462346 | SAMM50    | -0.091 | 0.477 | 0.250  | 0.273 | 0.065  | 0.695 | -0.175 | 0.231 |
| OLIGO_07633 | AW462519 | CHKB      | -0.206 | 0.550 | -0.065 | 0.780 | 0.179  | 0.379 | -0.113 | 0.542 |
| OLIGO_07636 | BF044830 | CHD8      | -0.090 | 0.624 | -0.323 | 0.172 | -0.132 | 0.512 | 0.111  | 0.552 |
| OLIGO_07639 | AW462379 | Ppt1      | 0.121  | 0.531 | -0.118 | 0.730 | 0.505  | 0.089 | -0.079 | 0.641 |
| OLIGO_07645 | AW462553 | EIF2S1    | 0.130  | 0.583 | 0.065  | 0.852 | -0.718 | 0.072 | -0.200 | 0.439 |
| OLIGO_07647 | BF044539 | LOC525795 | 0.305  | 0.115 | -0.429 | 0.029 | -0.301 | 0.183 | -0.136 | 0.440 |
| OLIGO_07648 | BM366737 | LOC91689  | 0.266  | 0.064 | -0.390 | 0.041 | -0.224 | 0.277 | -0.081 | 0.632 |
| OLIGO_07652 | AW462089 | BLVRB     | 0.039  | 0.763 | -0.392 | 0.348 | -0.551 | 0.015 | -0.372 | 0.106 |
| OLIGO_07655 | BF043697 | ODC1      | 0.115  | 0.709 | -0.044 | 0.903 | -0.185 | 0.683 | -0.537 | 0.005 |
| OLIGO_07661 | BM365030 | FRG1      | -0.009 | 0.965 | -0.495 | 0.066 | -0.237 | 0.155 | 0.241  | 0.225 |
| OLIGO_07668 | AW462459 | EVA1      | 0.200  | 0.560 | -0.739 | 0.054 | -0.249 | 0.413 | 0.282  | 0.313 |
| OLIGO_07670 | AW461415 | SEN2      | 0.326  | 0.080 | 0.814  | 0.091 | 0.359  | 0.486 | 0.091  | 0.678 |
| OLIGO_07671 | BF045400 | TBC1D14   | 0.032  | 0.865 | 0.482  | 0.035 | -0.132 | 0.620 | 0.025  | 0.860 |
| OLIGO_07672 | BF045929 | EHD1      | 0.029  | 0.836 | 0.208  | 0.447 | 0.070  | 0.777 | 0.152  | 0.508 |

|             |               |              |        |       |        |       |        |       |        |       |
|-------------|---------------|--------------|--------|-------|--------|-------|--------|-------|--------|-------|
| OLIGO_07673 | BF041104      | ZCCHC3       | -0.095 | 0.426 | 0.034  | 0.905 | 0.347  | 0.084 | -0.204 | 0.218 |
| OLIGO_07676 | AW463668      | NIFUN        | 0.082  | 0.581 | -0.074 | 0.820 | -0.168 | 0.596 | -0.740 | 0.011 |
| OLIGO_07685 | AW462337      | RALY         | 0.027  | 0.834 | 0.817  | 0.147 | 0.579  | 0.143 | 0.082  | 0.701 |
| OLIGO_07693 | BF044531      | CBX1         | 0.101  | 0.814 | -0.532 | 0.199 | -0.077 | 0.691 | -0.131 | 0.477 |
| OLIGO_07694 | BF040808      | ZNFX1        | 0.123  | 0.515 | 0.289  | 0.416 | -0.055 | 0.803 | -0.333 | 0.142 |
| OLIGO_07696 | BF043814      | CBL          | -0.225 | 0.157 | 0.021  | 0.944 | 0.520  | 0.028 | 0.263  | 0.212 |
| OLIGO_07697 | AW462347      | DUS2L        | -0.299 | 0.444 | 0.024  | 0.910 | 0.134  | 0.440 | -0.073 | 0.669 |
| OLIGO_07698 | BF042244      | TMEM60       | -0.055 | 0.715 | 0.402  | 0.094 | -0.060 | 0.837 | 0.298  | 0.009 |
| OLIGO_07701 | AW463788      | LRP16        | 0.036  | 0.849 | 0.446  | 0.186 | -0.205 | 0.369 | -0.168 | 0.469 |
| OLIGO_07702 | BF039164      | PARD3        | -0.206 | 0.270 | -0.053 | 0.867 | -0.465 | 0.178 | 0.210  | 0.184 |
| OLIGO_07705 | BF045275      | CHD4         | 0.105  | 0.513 | 0.081  | 0.765 | -0.250 | 0.279 | -0.476 | 0.012 |
| OLIGO_07706 | BM361939      | KLHL26       | -0.180 | 0.516 | -0.075 | 0.788 | -0.064 | 0.843 | -0.525 | 0.026 |
| OLIGO_07707 | AW462368      | FAM18B       | -0.188 | 0.383 | 0.022  | 0.941 | 0.545  | 0.036 | 0.105  | 0.595 |
| OLIGO_07714 | AW462554      | RP5-1022P6.2 | 0.497  | 0.125 | -0.047 | 0.860 | 0.097  | 0.648 | 0.221  | 0.250 |
| OLIGO_07715 | AW465802      | RTN4         | -0.211 | 0.396 | 0.301  | 0.480 | 0.083  | 0.818 | -0.401 | 0.149 |
| OLIGO_07717 | BF045856      | SCAND1       | 0.031  | 0.831 | 0.042  | 0.803 | -0.052 | 0.781 | -0.341 | 0.048 |
| OLIGO_07721 | BF045055      | SETDB1       | -0.013 | 0.916 | -0.114 | 0.561 | 0.032  | 0.799 | 0.046  | 0.753 |
| OLIGO_07722 | AW465956      | C1orf93      | -0.113 | 0.479 | -0.356 | 0.035 | -0.104 | 0.516 | -0.144 | 0.286 |
| OLIGO_07729 | AW462584      | GUSB         | 0.102  | 0.532 | 0.138  | 0.535 | 0.143  | 0.469 | -0.133 | 0.268 |
| OLIGO_07737 | BM364639      | KIAA0586     | -0.060 | 0.658 | -0.125 | 0.470 | -0.048 | 0.761 | -0.146 | 0.260 |
| OLIGO_07744 | BM366470      | GSTM5        | 0.160  | 0.437 | 0.146  | 0.618 | -0.109 | 0.522 | -0.010 | 0.958 |
| OLIGO_07751 | AW461406      | FAM112B      | 0.249  | 0.459 | 0.216  | 0.293 | 0.091  | 0.559 | -0.471 | 0.017 |
| OLIGO_07752 | AW463097      | XBP1         | 0.245  | 0.126 | 0.124  | 0.653 | 0.346  | 0.196 | -0.340 | 0.063 |
| OLIGO_07759 | AW462636      | Wdr451       | -0.002 | 0.988 | 0.108  | 0.735 | -0.140 | 0.152 | -0.140 | 0.259 |
| OLIGO_07763 | BF045890      | SEC23IP      | 0.166  | 0.319 | -0.195 | 0.442 | 0.081  | 0.742 | -0.033 | 0.878 |
| OLIGO_07765 | BF040631      | HSPA4        | 0.089  | 0.818 | -0.354 | 0.215 | -0.048 | 0.869 | -0.634 | 0.026 |
| OLIGO_07766 | AW462306      | TOR1A        | 0.095  | 0.556 | 0.238  | 0.506 | -0.031 | 0.903 | 0.203  | 0.291 |
| OLIGO_07770 | BM366785      | SART3        | 0.056  | 0.727 | 0.230  | 0.220 | 0.195  | 0.336 | -0.081 | 0.598 |
| OLIGO_07773 | AW462480      | SREBF1       | -0.230 | 0.294 | 0.462  | 0.276 | 0.658  | 0.200 | 0.428  | 0.137 |
| OLIGO_07777 | AW463830      | DCTN1        | -0.237 | 0.194 | -0.310 | 0.195 | -0.148 | 0.627 | -0.572 | 0.011 |
| OLIGO_07779 | BF045083      | CTDSP1       | -0.178 | 0.396 | 0.486  | 0.348 | 0.056  | 0.744 | 0.492  | 0.039 |
| OLIGO_07782 | AW462338      | VPS53        | -0.237 | 0.489 | 0.623  | 0.181 | 0.214  | 0.271 | -0.005 | 0.986 |
| OLIGO_07785 | BF039373      | LMCD1        | -0.044 | 0.868 | 0.214  | 0.614 | -0.403 | 0.145 | 0.232  | 0.382 |
| OLIGO_07787 | AW462509      | LOC523454    | -0.089 | 0.700 | -0.211 | 0.445 | 0.365  | 0.450 | 0.245  | 0.276 |
| OLIGO_07788 | AW465191      | RRAS         | 0.001  | 0.998 | -0.103 | 0.750 | -0.220 | 0.330 | 0.077  | 0.602 |
| OLIGO_07789 | BF042526      | NDUFB9       | 0.100  | 0.773 | 0.002  | 0.995 | -0.137 | 0.590 | -0.549 | 0.012 |
| OLIGO_07792 | AW462348      | MRPL34       | 0.148  | 0.374 | -0.098 | 0.734 | 0.048  | 0.863 | 0.294  | 0.106 |
| OLIGO_07795 | BF040869      | LGR8         | -0.280 | 0.245 | -0.114 | 0.592 | -0.063 | 0.846 | 0.703  | 0.047 |
| OLIGO_07799 | AW462521      | ABCG2        | -0.142 | 0.436 | 0.063  | 0.779 | -0.053 | 0.882 | 0.114  | 0.499 |
| OLIGO_07804 | AW463291      | USP2         | -0.275 | 0.418 | 0.081  | 0.713 | -0.106 | 0.762 | 0.370  | 0.040 |
| OLIGO_07806 | AW462259      | MRPL54       | 0.009  | 0.952 | 0.425  | 0.211 | 1.179  | 0.033 | 0.101  | 0.550 |
| OLIGO_07807 | AW462369      | RARRES1      | -0.078 | 0.597 | -0.810 | 0.245 | 0.313  | 0.633 | 0.969  | 0.005 |
| OLIGO_07809 | BF042174      | PARK7        | -0.070 | 0.732 | 0.025  | 0.928 | -0.034 | 0.844 | -0.218 | 0.187 |
| OLIGO_07811 | AW462392      | CDH23        | -0.264 | 0.188 | -0.160 | 0.676 | -0.221 | 0.438 | -0.489 | 0.216 |
| OLIGO_07815 | BF042702      | H2AFJ        | -0.394 | 0.084 | 0.247  | 0.481 | 0.779  | 0.057 | -0.010 | 0.975 |
| OLIGO_07819 | BF041160      | TBX2         | -0.116 | 0.553 | 0.191  | 0.337 | 0.250  | 0.350 | 0.037  | 0.808 |
| OLIGO_07820 | BM362510      | POP7         | -0.110 | 0.586 | 0.113  | 0.611 | -0.233 | 0.132 | -0.041 | 0.768 |
| OLIGO_07823 | BP22000618803 | DHRS3        | -0.073 | 0.548 | -0.200 | 0.421 | 0.051  | 0.858 | 0.057  | 0.684 |
| OLIGO_07826 | AW461824      | VPS29        | 0.010  | 0.949 | 0.161  | 0.583 | 0.204  | 0.237 | -0.037 | 0.874 |
| OLIGO_07830 | AW462450      | RBPSUH       | -0.011 | 0.961 | -0.246 | 0.456 | 0.530  | 0.157 | 0.278  | 0.168 |
| OLIGO_07832 | BF042202      | SEMA4B       | -0.090 | 0.393 | 0.237  | 0.550 | 0.069  | 0.805 | -0.083 | 0.578 |
| OLIGO_07833 | BM363181      | SAPS3        | -0.058 | 0.736 | 0.094  | 0.625 | -0.506 | 0.025 | -0.045 | 0.668 |
| OLIGO_07835 | BF046234      | RABEP1       | 0.018  | 0.875 | 0.083  | 0.713 | -0.394 | 0.250 | 0.053  | 0.820 |
| OLIGO_07840 | AW465170      | CD63         | 0.352  | 0.144 | -0.537 | 0.357 | 0.856  | 0.157 | 0.492  | 0.236 |
| OLIGO_07843 | AW462637      | AGPAT5       | 0.096  | 0.720 | -0.038 | 0.895 | -0.325 | 0.254 | -0.759 | 0.015 |
| OLIGO_07844 | AW462728      | MLLT4        | 0.039  | 0.889 | -0.102 | 0.853 | 0.114  | 0.787 | 0.062  | 0.846 |
| OLIGO_07851 | AW462297      | ING1         | -0.207 | 0.319 | 0.172  | 0.621 | 0.001  | 0.997 | 0.431  | 0.120 |
| OLIGO_07853 | BF045672      | SPCS1        | -0.088 | 0.544 | -0.314 | 0.139 | 0.100  | 0.658 | -0.229 | 0.317 |
| OLIGO_07854 | BF041885      | NDUFA12      | 0.022  | 0.852 | -0.221 | 0.409 | -0.084 | 0.686 | -0.521 | 0.027 |

|             |          |          |        |       |        |       |        |       |        |       |
|-------------|----------|----------|--------|-------|--------|-------|--------|-------|--------|-------|
| OLIGO_07855 | AW462308 | SEC13L1  | 0.098  | 0.331 | 0.085  | 0.712 | 0.140  | 0.502 | -0.453 | 0.016 |
| OLIGO_07856 | BF044530 | EPN1     | -0.161 | 0.229 | 0.065  | 0.736 | -0.287 | 0.080 | -0.226 | 0.117 |
| OLIGO_07866 | BF046043 | ARL8B    | 0.078  | 0.701 | 0.351  | 0.121 | -0.007 | 0.966 | 0.351  | 0.026 |
| OLIGO_07867 | BF043967 | TRIP10   | 0.001  | 0.996 | -0.072 | 0.822 | -0.080 | 0.730 | -0.175 | 0.480 |
| OLIGO_07870 | AW462328 | CASP8AP2 | 0.041  | 0.783 | 0.328  | 0.232 | 0.078  | 0.713 | -0.555 | 0.001 |
| OLIGO_07881 | AW464074 | SNRPD3   | -0.017 | 0.936 | 0.034  | 0.893 | -0.023 | 0.922 | -0.227 | 0.336 |
| OLIGO_07882 | AW461342 | INTS12   | -0.068 | 0.905 | -0.326 | 0.219 | -0.214 | 0.262 | -0.549 | 0.055 |
| OLIGO_07883 | AW462350 | ARHGAP27 | -0.082 | 0.811 | 0.129  | 0.730 | 0.140  | 0.541 | -0.265 | 0.227 |
| OLIGO_07889 | BF040871 | AP2A1    | -0.081 | 0.567 | 0.289  | 0.293 | 0.382  | 0.373 | -0.023 | 0.923 |
| OLIGO_07893 | BM362751 | TRAF5    | -0.168 | 0.620 | -0.094 | 0.787 | 0.173  | 0.563 | -0.387 | 0.201 |
| OLIGO_07895 | AW462891 | TRRAP    | 0.045  | 0.736 | -0.072 | 0.810 | -0.339 | 0.155 | -0.296 | 0.066 |
| OLIGO_07898 | BF041643 | JARID1B  | 0.261  | 0.435 | -0.097 | 0.766 | 0.100  | 0.476 | 0.101  | 0.440 |
| OLIGO_07901 | BF043971 | FBXO3    | 0.072  | 0.731 | 0.001  | 0.995 | -0.062 | 0.731 | 0.075  | 0.658 |
| OLIGO_07913 | BF046201 | GDF6     | -0.072 | 0.832 | -0.588 | 0.141 | 0.728  | 0.292 | 0.929  | 0.006 |
| OLIGO_07914 | AW462454 | SACM1L   | 0.118  | 0.638 | -0.118 | 0.572 | 0.217  | 0.353 | 0.082  | 0.576 |
| OLIGO_07917 | AW462597 | CCL2     | -0.086 | 0.644 | -0.061 | 0.800 | 0.034  | 0.809 | -0.131 | 0.626 |
| OLIGO_07918 | AW462117 | C15orf24 | 0.216  | 0.331 | 0.215  | 0.503 | 0.210  | 0.357 | -0.497 | 0.004 |
| OLIGO_07927 | AW466104 | DSTN     | -0.053 | 0.660 | 0.107  | 0.759 | 0.051  | 0.836 | -0.240 | 0.216 |
| OLIGO_07941 | BF041432 | PPME1    | 0.203  | 0.160 | 0.451  | 0.179 | 0.088  | 0.683 | 0.000  | 1.000 |
| OLIGO_07944 | AW463070 | RPS6KB1  | 0.063  | 0.814 | 0.510  | 0.233 | -0.287 | 0.504 | -0.091 | 0.727 |
| OLIGO_07947 | BF042383 | TBCA     | 0.012  | 0.942 | -0.313 | 0.222 | -0.024 | 0.930 | -0.460 | 0.010 |
| OLIGO_07953 | AW461551 | Map4k4   | 0.367  | 0.262 | 0.942  | 0.068 | -0.181 | 0.494 | 0.591  | 0.013 |
| OLIGO_07955 | BF044821 | RNASEH2A | 0.044  | 0.793 | -0.079 | 0.741 | -0.157 | 0.627 | -0.582 | 0.035 |
| OLIGO_07962 | BF046014 | PRDX1    | 0.523  | 0.023 | -0.011 | 0.982 | 0.430  | 0.279 | -0.070 | 0.783 |
| OLIGO_07963 | AW462362 | PSMD8    | 0.303  | 0.118 | -0.068 | 0.837 | -0.115 | 0.485 | -0.126 | 0.486 |
| OLIGO_07967 | BF044163 | MAPRE1   | 0.640  | 0.003 | -0.260 | 0.528 | -0.020 | 0.941 | 0.207  | 0.326 |
| OLIGO_07969 | BF440194 | HNRPF    | 0.134  | 0.737 | 0.130  | 0.778 | 0.064  | 0.822 | 0.023  | 0.929 |
| OLIGO_07971 | AW465855 | EPB41    | 0.058  | 0.749 | 0.585  | 0.050 | 0.088  | 0.497 | 0.623  | 0.123 |
| OLIGO_07973 | BF040027 | EBNA1BP2 | 0.440  | 0.015 | 0.143  | 0.675 | 0.339  | 0.250 | 0.323  | 0.227 |
| OLIGO_07976 | AW462546 | COPZ2    | 0.037  | 0.848 | -0.452 | 0.122 | 0.320  | 0.437 | 0.193  | 0.269 |
| OLIGO_07979 | BF040250 | GPKOW    | 0.157  | 0.445 | -0.208 | 0.533 | -0.351 | 0.231 | -0.099 | 0.620 |
| OLIGO_07980 | AW462395 | CD163    | -0.329 | 0.471 | 0.006  | 0.993 | -0.733 | 0.404 | 0.833  | 0.058 |
| OLIGO_07987 | BF040553 | MFAP2    | 0.126  | 0.725 | -0.745 | 0.055 | -0.043 | 0.818 | -0.057 | 0.752 |
| OLIGO_07991 | BM365649 | TNPO2    | -0.321 | 0.322 | -0.292 | 0.528 | 0.597  | 0.168 | -0.541 | 0.264 |
| OLIGO_07999 | BF042208 | SLC1A3   | 0.020  | 0.883 | 0.630  | 0.360 | 0.035  | 0.940 | 0.122  | 0.471 |
| OLIGO_08004 | AW465805 | DUT      | 0.229  | 0.415 | 0.287  | 0.537 | 0.171  | 0.723 | -0.812 | 0.009 |
| OLIGO_08008 | BF039520 | ZA20D2   | 0.153  | 0.490 | -0.166 | 0.631 | -0.258 | 0.292 | 0.961  | 0.002 |
| OLIGO_08009 | AW465859 | RPUSD3   | 0.037  | 0.833 | -0.082 | 0.747 | -0.149 | 0.468 | 0.161  | 0.416 |
| OLIGO_08012 | AW464387 | WDR13    | 0.092  | 0.703 | 0.119  | 0.631 | 0.035  | 0.856 | 0.253  | 0.316 |
| OLIGO_08018 | BF046190 | PTGDS    | 0.113  | 0.783 | 0.283  | 0.361 | 0.040  | 0.907 | 0.112  | 0.507 |
| OLIGO_08019 | AW462617 | PRSS15   | -0.010 | 0.952 | 0.161  | 0.390 | -0.050 | 0.733 | 0.056  | 0.590 |
| OLIGO_08020 | BF043383 | CYP20A1  | -0.045 | 0.678 | -0.226 | 0.376 | -0.010 | 0.951 | -0.262 | 0.142 |
| OLIGO_08021 | AW462925 | GPS1     | -0.106 | 0.342 | -0.153 | 0.531 | 0.251  | 0.347 | -0.115 | 0.494 |
| OLIGO_08025 | BF046519 | UBE1     | 0.083  | 0.563 | 0.101  | 0.631 | 0.238  | 0.122 | -0.358 | 0.075 |
| OLIGO_08032 | AW463121 | CD151    | -0.249 | 0.480 | -0.272 | 0.299 | 0.241  | 0.418 | 0.497  | 0.064 |
| OLIGO_08037 | AW462074 | RUFY3    | 0.127  | 0.586 | -0.010 | 0.977 | 0.340  | 0.289 | -0.028 | 0.885 |
| OLIGO_08042 | AW462493 | CCNL1    | 0.219  | 0.254 | -0.288 | 0.150 | -0.182 | 0.327 | 0.278  | 0.260 |
| OLIGO_08044 | BF044433 | PARL     | 0.158  | 0.304 | -0.261 | 0.244 | -0.027 | 0.866 | -0.134 | 0.487 |
| OLIGO_08049 | AW462503 | CSDA     | -0.109 | 0.712 | -0.499 | 0.090 | 0.023  | 0.949 | -0.037 | 0.885 |
| OLIGO_08051 | AW463798 | PSMA6    | 0.209  | 0.571 | 0.156  | 0.564 | -0.034 | 0.901 | -0.012 | 0.958 |
| OLIGO_08052 | AW463765 | ADAR     | 0.519  | 0.066 | -0.193 | 0.705 | -0.485 | 0.498 | 0.084  | 0.847 |
| OLIGO_08054 | BF039924 | ING4     | -0.126 | 0.473 | 0.246  | 0.265 | 0.026  | 0.904 | 0.293  | 0.122 |
| OLIGO_08056 | AW462363 | C2orf25  | 0.446  | 0.060 | 0.154  | 0.590 | -0.016 | 0.916 | -0.375 | 0.036 |
| OLIGO_08061 | BF046129 | OPRS1    | 0.295  | 0.141 | 0.046  | 0.739 | 0.096  | 0.509 | 0.332  | 0.081 |
| OLIGO_08062 | BF040578 | RBM9     | 0.180  | 0.318 | -0.307 | 0.347 | -0.186 | 0.371 | 0.137  | 0.480 |
| OLIGO_08072 | BF040599 | COX5A    | -0.036 | 0.888 | 0.207  | 0.396 | 0.098  | 0.625 | -0.112 | 0.532 |
| OLIGO_08078 | BM361890 | SUPT6H   | 0.022  | 0.892 | 0.125  | 0.583 | 0.152  | 0.400 | 0.172  | 0.444 |
| OLIGO_08079 | AW461861 | ABHD11   | 0.931  | 0.013 | 0.280  | 0.227 | 0.119  | 0.196 | 0.021  | 0.913 |
| OLIGO_08081 | BF045642 | WDR55    | 0.074  | 0.602 | -0.101 | 0.640 | 0.278  | 0.414 | -0.460 | 0.077 |
| OLIGO_08084 | AW465399 | AHSA1    | 0.176  | 0.215 | 0.118  | 0.555 | 0.062  | 0.689 | 0.197  | 0.327 |

|             |               |           |        |       |        |       |        |       |        |       |
|-------------|---------------|-----------|--------|-------|--------|-------|--------|-------|--------|-------|
| OLIGO_08085 | AW465125      | HADH2     | 0.147  | 0.379 | -0.043 | 0.831 | 0.051  | 0.812 | -0.132 | 0.437 |
| OLIGO_08092 | AW462599      | LOC506627 | 0.067  | 0.705 | 0.364  | 0.422 | -0.615 | 0.335 | 0.812  | 0.002 |
| OLIGO_08095 | BF039394      | DGKH      | 0.358  | 0.210 | -0.263 | 0.313 | 0.337  | 0.314 | -0.224 | 0.321 |
| OLIGO_08104 | AW462610      | MMP15     | 0.001  | 0.997 | -0.403 | 0.089 | 0.416  | 0.268 | -0.032 | 0.898 |
| OLIGO_08105 | BF046055      | PAPD1     | -0.067 | 0.694 | -0.280 | 0.259 | -0.147 | 0.388 | -0.223 | 0.302 |
| OLIGO_08111 | BF044787      | DERL1     | -0.220 | 0.368 | 0.192  | 0.439 | 0.199  | 0.233 | -0.125 | 0.562 |
| OLIGO_08112 | BM363845      | MTX1      | -0.027 | 0.879 | 0.394  | 0.250 | 0.147  | 0.372 | -0.295 | 0.097 |
| OLIGO_08115 | BF044958      | FAM98C    | 0.096  | 0.476 | 0.376  | 0.504 | 0.306  | 0.445 | 0.505  | 0.262 |
| OLIGO_08119 | BM364879      | LSM4      | 0.515  | 0.064 | -0.047 | 0.843 | 0.085  | 0.597 | -0.178 | 0.475 |
| OLIGO_08124 | BP22000603303 | POLG2     | 0.828  | 0.001 | -0.749 | 0.005 | 0.038  | 0.853 | 0.429  | 0.118 |
| OLIGO_08125 | BF044924      | DNAJC4    | 0.275  | 0.123 | -0.164 | 0.592 | 0.098  | 0.643 | 0.136  | 0.518 |
| OLIGO_08126 | AW462649      | C1orf160  | -0.228 | 0.319 | -0.185 | 0.524 | -0.056 | 0.790 | 0.024  | 0.875 |
| OLIGO_08127 | BF046183      | NGRN      | 0.279  | 0.146 | -0.447 | 0.095 | -0.135 | 0.463 | 0.073  | 0.715 |
| OLIGO_08132 | BF044923      | LOC647535 | -0.349 | 0.405 | 0.058  | 0.820 | 0.243  | 0.247 | 0.199  | 0.397 |
| OLIGO_08140 | BF042852      | RGMB      | -0.280 | 0.136 | 0.018  | 0.932 | 0.040  | 0.786 | 0.129  | 0.454 |
| OLIGO_08143 | AW465745      | PKN1      | 0.053  | 0.746 | -0.060 | 0.821 | -0.261 | 0.300 | -0.014 | 0.954 |
| OLIGO_08144 | AW463701      | MKL1      | 0.055  | 0.738 | 0.187  | 0.554 | -0.359 | 0.234 | -0.235 | 0.189 |
| OLIGO_08149 | AW461431      | LOC653610 | 0.508  | 0.205 | 0.143  | 0.715 | 0.560  | 0.109 | -0.112 | 0.520 |
| OLIGO_08150 | AW462866      | EIF5A     | -0.211 | 0.437 | 0.413  | 0.332 | 0.480  | 0.129 | 0.365  | 0.223 |
| OLIGO_08154 | BF042079      | TCEB1     | 0.169  | 0.356 | 0.089  | 0.702 | 0.242  | 0.370 | -0.140 | 0.301 |
| OLIGO_08155 | AW464405      | GLRX      | 0.441  | 0.206 | 0.331  | 0.327 | 0.445  | 0.200 | 0.382  | 0.118 |
| OLIGO_08161 | AW464953      | COPB      | 0.597  | 0.003 | 0.687  | 0.201 | 0.270  | 0.242 | 0.609  | 0.012 |
| OLIGO_08162 | AW465353      | ARL4A     | -0.243 | 0.371 | 0.660  | 0.127 | 0.075  | 0.759 | 0.574  | 0.003 |
| OLIGO_08165 | BM366255      | NHN1      | 0.350  | 0.020 | 0.228  | 0.412 | 0.138  | 0.472 | -0.746 | 0.000 |
| OLIGO_08168 | AW465185      | SUMO1     | 0.128  | 0.470 | 0.000  | 1.000 | -0.235 | 0.392 | -0.116 | 0.702 |
| OLIGO_08169 | AW462262      | GRHPR     | 0.030  | 0.853 | 0.033  | 0.869 | -0.210 | 0.224 | -0.071 | 0.671 |
| OLIGO_08175 | BF040043      | LOC532359 | 0.191  | 0.340 | 0.084  | 0.727 | 0.001  | 0.996 | 0.038  | 0.866 |
| OLIGO_08176 | BF046049      | SMU1      | 0.138  | 0.403 | -0.136 | 0.702 | 0.396  | 0.162 | 0.160  | 0.342 |
| OLIGO_08178 | AW465469      | EXOSC1    | 0.362  | 0.124 | -1.352 | 0.021 | -0.063 | 0.873 | -0.194 | 0.595 |
| OLIGO_08179 | BF440577      | CREB3L2   | -0.006 | 0.982 | 0.084  | 0.793 | 0.476  | 0.139 | 0.854  | 0.004 |
| OLIGO_08182 | AW464715      | DAZAP2    | -0.104 | 0.669 | 0.082  | 0.772 | -0.192 | 0.553 | -0.122 | 0.566 |
| OLIGO_08183 | BF440221      | FAM108A1  | 0.111  | 0.569 | -0.257 | 0.448 | 0.073  | 0.775 | -0.558 | 0.006 |
| OLIGO_08193 | AW462407      | PSMD13    | 0.424  | 0.023 | -0.115 | 0.780 | 0.392  | 0.207 | -0.340 | 0.098 |
| OLIGO_08197 | BM366445      | FLOT2     | -0.199 | 0.204 | -0.267 | 0.158 | -0.183 | 0.267 | 0.364  | 0.123 |
| OLIGO_08202 | BF039526      | SCNM1     | 0.281  | 0.176 | 0.028  | 0.948 | 0.274  | 0.359 | 0.015  | 0.952 |
| OLIGO_08206 | BM366035      | ATP5I     | 0.088  | 0.554 | -0.028 | 0.950 | 0.644  | 0.172 | 0.307  | 0.483 |
| OLIGO_08210 | BF046302      | FBXO31    | -0.484 | 0.077 | 0.070  | 0.841 | -0.179 | 0.122 | 0.126  | 0.606 |
| OLIGO_08212 | BM365375      | CTF8      | -0.483 | 0.093 | -0.831 | 0.055 | -0.418 | 0.343 | -0.455 | 0.081 |
| OLIGO_08213 | BM364907      | BAT4      | 0.297  | 0.159 | -0.222 | 0.418 | 0.144  | 0.460 | -0.077 | 0.698 |
| OLIGO_08214 | BF039367      | KHDRBS3   | 0.191  | 0.458 | 0.209  | 0.466 | 0.048  | 0.872 | -0.591 | 0.007 |
| OLIGO_08220 | BF045796      | SWAP70    | 0.192  | 0.308 | 0.354  | 0.519 | 0.506  | 0.266 | 0.627  | 0.278 |
| OLIGO_08221 | BF042647      | GTF2IP1   | 0.589  | 0.025 | -0.660 | 0.123 | -0.580 | 0.194 | -0.102 | 0.676 |
| OLIGO_08223 | AW461331      | PHLPP     | 0.066  | 0.768 | -0.060 | 0.793 | -0.283 | 0.094 | 0.360  | 0.134 |
| OLIGO_08228 | AW461823      | EMG1      | 0.424  | 0.026 | 0.377  | 0.118 | 0.044  | 0.810 | 0.314  | 0.101 |
| OLIGO_08229 | AW462412      | CLK2      | -0.109 | 0.502 | 0.209  | 0.406 | 0.085  | 0.592 | -0.131 | 0.491 |
| OLIGO_08230 | AW462697      | SRPK2     | 0.221  | 0.262 | 0.485  | 0.136 | 0.131  | 0.471 | -0.190 | 0.386 |
| OLIGO_08232 | BM361956      | GNG11     | -0.089 | 0.686 | 0.778  | 0.183 | 0.125  | 0.854 | 0.650  | 0.070 |
| OLIGO_08233 | BF440165      | bubp43    | -0.040 | 0.842 | 0.177  | 0.546 | 0.132  | 0.690 | 0.550  | 0.229 |
| OLIGO_08235 | BF046191      | LOC508141 | 0.227  | 0.112 | -0.093 | 0.692 | -0.168 | 0.186 | 0.327  | 0.180 |
| OLIGO_08237 | AW462882      | SCARA5    | 0.244  | 0.220 | -0.094 | 0.690 | 0.061  | 0.690 | -0.408 | 0.455 |
| OLIGO_08243 | AW462739      | SFT2D1    | 0.220  | 0.539 | 0.089  | 0.792 | 0.141  | 0.652 | 0.027  | 0.912 |
| OLIGO_08244 | AW462229      | KBTBD11   | 0.109  | 0.748 | 0.124  | 0.719 | -0.811 | 0.126 | -0.040 | 0.905 |
| OLIGO_08246 | AW463894      | NDUFC2    | 0.111  | 0.485 | 0.226  | 0.598 | 0.414  | 0.242 | -0.004 | 0.990 |
| OLIGO_08248 | BF041939      | MRPL43    | -0.194 | 0.437 | 0.032  | 0.879 | 0.577  | 0.112 | -0.396 | 0.076 |
| OLIGO_08250 | AW463299      | RNF7      | 0.153  | 0.350 | 0.141  | 0.647 | -0.181 | 0.474 | 0.282  | 0.082 |
| OLIGO_08251 | AW462892      | CYP11A1   | 0.257  | 0.407 | 0.072  | 0.867 | 0.824  | 0.211 | 0.935  | 0.009 |
| OLIGO_08252 | AW463009      | MIF       | 0.089  | 0.664 | -0.016 | 0.956 | -0.015 | 0.972 | -0.140 | 0.530 |
| OLIGO_08253 | AW461656      | SMTNL2    | 0.183  | 0.410 | -0.113 | 0.623 | -0.482 | 0.079 | 0.135  | 0.603 |
| OLIGO_08257 | BF041379      | MYO5B     | 0.290  | 0.162 | 0.704  | 0.029 | 0.089  | 0.533 | -0.022 | 0.898 |
| OLIGO_08259 | AW463910      | DDX6      | 0.187  | 0.303 | 0.605  | 0.224 | -0.045 | 0.848 | 0.015  | 0.941 |

|             |               |           |        |       |        |       |        |       |        |       |
|-------------|---------------|-----------|--------|-------|--------|-------|--------|-------|--------|-------|
| OLIGO_08261 | BF041736      | Pafah1b2  | 0.465  | 0.046 | -0.138 | 0.720 | -0.314 | 0.262 | 0.019  | 0.925 |
| OLIGO_08262 | AW462168      | C20orf24  | 0.464  | 0.001 | -0.046 | 0.878 | 0.398  | 0.137 | -0.386 | 0.115 |
| OLIGO_08269 | BM363855      | PLA2G2D   | -0.539 | 0.172 | -0.103 | 0.707 | 0.279  | 0.342 | 0.193  | 0.483 |
| OLIGO_08273 | BF042838      | CCDC58    | 0.111  | 0.530 | 0.084  | 0.616 | 0.123  | 0.540 | 0.386  | 0.167 |
| OLIGO_08274 | AW462956      | BNIP3     | -0.196 | 0.167 | -0.023 | 0.954 | -0.229 | 0.385 | 0.708  | 0.005 |
| OLIGO_08275 | AW462538      | SNRPB2    | 0.425  | 0.024 | -0.068 | 0.789 | 0.083  | 0.531 | 0.002  | 0.991 |
| OLIGO_08276 | AW465283      | ANAPC13   | -0.116 | 0.518 | -0.177 | 0.658 | -0.336 | 0.178 | -0.523 | 0.014 |
| OLIGO_08277 | BF039915      | HDAC5     | 0.367  | 0.067 | 0.159  | 0.730 | 0.161  | 0.498 | -0.100 | 0.653 |
| OLIGO_08280 | AW462848      | SP100     | 0.229  | 0.529 | 0.220  | 0.477 | 0.086  | 0.690 | 0.245  | 0.181 |
| OLIGO_08281 | BF045696      | DYNC1LI1  | 0.342  | 0.130 | -0.148 | 0.701 | 0.259  | 0.265 | 0.167  | 0.439 |
| OLIGO_08292 | BF043996      | MTHFD1    | 0.306  | 0.340 | -0.302 | 0.304 | -0.154 | 0.531 | -0.421 | 0.080 |
| OLIGO_08293 | AW463895      | NOL7      | 0.155  | 0.631 | -0.788 | 0.008 | -0.064 | 0.685 | 0.398  | 0.117 |
| OLIGO_08297 | BM362093      | ABCC5     | 0.192  | 0.331 | -0.179 | 0.583 | -0.098 | 0.682 | -0.054 | 0.871 |
| OLIGO_08298 | BM365709      | NUDC      | -0.003 | 0.991 | -0.017 | 0.973 | 0.388  | 0.480 | 0.194  | 0.556 |
| OLIGO_08300 | BF043214      | MKNK1     | 0.254  | 0.117 | 0.060  | 0.815 | -0.107 | 0.668 | 0.240  | 0.225 |
| OLIGO_08306 | AW464352      | ID2       | -0.129 | 0.608 | -0.136 | 0.672 | 0.065  | 0.806 | 0.523  | 0.019 |
| OLIGO_08307 | AW465566      | TGM2      | -0.336 | 0.173 | -0.056 | 0.756 | -0.038 | 0.797 | 0.540  | 0.004 |
| OLIGO_08309 | BF044448      | UMPS      | 0.273  | 0.175 | -0.418 | 0.182 | 0.094  | 0.702 | -0.827 | 0.001 |
| OLIGO_08314 | AW464292      | NDUFB5    | 0.194  | 0.289 | 0.295  | 0.297 | 0.074  | 0.734 | -0.181 | 0.348 |
| OLIGO_08315 | AW463132      | C6orf130  | 0.170  | 0.354 | 0.337  | 0.384 | 0.321  | 0.061 | 0.027  | 0.893 |
| OLIGO_08325 | BP22000601003 | LOC508082 | 0.256  | 0.292 | -0.134 | 0.612 | 0.183  | 0.342 | -0.073 | 0.754 |
| OLIGO_08328 | AW462711      | LOC616635 | 0.370  | 0.404 | 0.942  | 0.090 | 0.619  | 0.051 | 0.112  | 0.682 |
| OLIGO_08329 | AW461364      | QKI       | 0.475  | 0.175 | -0.310 | 0.071 | 0.057  | 0.818 | 0.297  | 0.127 |
| OLIGO_08334 | AW461514      | ANPEP     | 0.275  | 0.064 | 0.014  | 0.955 | 0.178  | 0.621 | -0.088 | 0.683 |
| OLIGO_08336 | AW462247      | PSMA4     | 0.248  | 0.244 | 0.315  | 0.516 | 0.231  | 0.408 | -0.054 | 0.815 |
| OLIGO_08338 | AW463363      | KIAA0323  | -0.909 | 0.227 | -0.060 | 0.844 | 0.108  | 0.544 | 0.010  | 0.960 |
| OLIGO_08344 | AW461706      | SAP30     | 0.038  | 0.869 | 0.328  | 0.574 | -0.094 | 0.776 | -0.325 | 0.432 |
| OLIGO_08345 | AW461709      | FLJ20647  | -0.243 | 0.387 | 0.418  | 0.139 | 0.232  | 0.492 | -0.695 | 0.041 |
| OLIGO_08347 | AW461373      | GNL3      | 0.038  | 0.845 | -0.016 | 0.980 | -0.194 | 0.515 | -0.131 | 0.735 |
| OLIGO_08348 | AW462805      | VPS25     | 0.048  | 0.704 | 0.176  | 0.518 | 0.139  | 0.420 | -0.145 | 0.447 |
| OLIGO_08349 | AW461734      | Usp12     | 0.143  | 0.217 | -0.112 | 0.601 | -0.353 | 0.055 | -0.016 | 0.930 |
| OLIGO_08352 | AW461754      | LOC505940 | -0.100 | 0.759 | 0.114  | 0.784 | -0.019 | 0.932 | -0.099 | 0.673 |
| OLIGO_08355 | AW461830      | GPX1      | 0.118  | 0.439 | 0.329  | 0.502 | 0.599  | 0.112 | 0.133  | 0.693 |
| OLIGO_08356 | AW461844      | CC2D1B    | -0.033 | 0.888 | 0.292  | 0.653 | -0.234 | 0.557 | -0.020 | 0.944 |
| OLIGO_08357 | AW461987      | PRL       | 0.255  | 0.427 | -0.045 | 0.958 | 2.104  | 0.103 | 0.169  | 0.590 |
| OLIGO_08362 | AW461896      | TAOK3     | -0.198 | 0.540 | -0.040 | 0.880 | -0.054 | 0.841 | 0.123  | 0.595 |
| OLIGO_08364 | AW463631      | NDUFA1    | 0.147  | 0.513 | 0.039  | 0.893 | 0.065  | 0.811 | -0.228 | 0.247 |
| OLIGO_08365 | AW463268      | ELF3      | -0.129 | 0.522 | 0.166  | 0.482 | 0.365  | 0.111 | -0.149 | 0.453 |
| OLIGO_08371 | AW465915      | ARFGAP1   | -0.252 | 0.225 | 0.022  | 0.904 | -0.202 | 0.213 | -0.068 | 0.718 |
| OLIGO_08372 | AW461998      | CSRP1     | -0.180 | 0.669 | -0.094 | 0.702 | -0.314 | 0.178 | 0.255  | 0.204 |
| OLIGO_08375 | AW461989      | DNAJA4    | -0.639 | 0.139 | -0.141 | 0.729 | 0.278  | 0.308 | -0.074 | 0.822 |
| OLIGO_08376 | AW461995      | SH2D3C    | -0.763 | 0.022 | -0.154 | 0.664 | -0.276 | 0.378 | -0.310 | 0.286 |
| OLIGO_08379 | AW462147      | CRSP7     | 0.024  | 0.865 | 0.067  | 0.704 | -0.020 | 0.873 | -0.108 | 0.492 |
| OLIGO_08380 | BF043621      | PYGO2     | -0.118 | 0.437 | 0.055  | 0.675 | -0.104 | 0.284 | -0.055 | 0.636 |
| OLIGO_08381 | AW462018      | S100A6    | -0.246 | 0.471 | -0.119 | 0.407 | -0.097 | 0.487 | -0.051 | 0.695 |
| OLIGO_08382 | AW462021      | LOC512313 | -0.061 | 0.742 | 0.308  | 0.380 | 0.721  | 0.132 | -0.529 | 0.036 |
| OLIGO_08383 | AW462027      | SLC39A11  | -0.022 | 0.816 | 0.187  | 0.454 | -0.192 | 0.319 | -0.391 | 0.011 |
| OLIGO_08385 | AW462032      | LOC508291 | 0.034  | 0.881 | -0.344 | 0.250 | 0.253  | 0.395 | -0.583 | 0.007 |
| OLIGO_08386 | AW462034      | ACP2      | 0.004  | 0.980 | 0.037  | 0.825 | -0.040 | 0.789 | -0.255 | 0.014 |
| OLIGO_08388 | AW465457      | C17orf61  | 0.189  | 0.187 | -0.217 | 0.276 | -0.137 | 0.559 | -0.044 | 0.829 |
| OLIGO_08390 | AW463393      | BET1      | -0.143 | 0.338 | -0.363 | 0.240 | 0.355  | 0.325 | 0.191  | 0.274 |
| OLIGO_08393 | AW465149      | SCARB2    | -0.072 | 0.694 | -0.106 | 0.669 | 0.093  | 0.680 | 0.246  | 0.240 |
| OLIGO_08394 | AW462097      | GAPVD1    | -0.002 | 0.988 | -0.127 | 0.660 | 0.664  | 0.188 | -0.803 | 0.002 |
| OLIGO_08396 | AW462131      | TRPC4AP   | -0.156 | 0.091 | 0.326  | 0.102 | 0.266  | 0.124 | -0.084 | 0.565 |
| OLIGO_08398 | AW462136      | LEPRE1    | -0.106 | 0.413 | -0.383 | 0.083 | -0.029 | 0.863 | -0.095 | 0.398 |
| OLIGO_08400 | AW462187      | FRAP1     | -0.185 | 0.242 | -0.012 | 0.975 | -0.212 | 0.496 | -0.611 | 0.053 |
| OLIGO_08401 | AW462249      | BCAM      | -0.163 | 0.384 | -0.382 | 0.074 | 0.526  | 0.080 | 0.258  | 0.069 |
| OLIGO_08404 | AW461409      | PPARBP    | -0.119 | 0.573 | -0.102 | 0.807 | -0.261 | 0.351 | -0.679 | 0.029 |
| OLIGO_08407 | AW463541      | MARVELD3  | 0.157  | 0.590 | -0.337 | 0.201 | -0.077 | 0.655 | -0.388 | 0.067 |
| OLIGO_08409 | AW462359      | PARP4     | 0.643  | 0.156 | -0.154 | 0.597 | 0.049  | 0.865 | -0.573 | 0.067 |



|             |          |           |        |       |        |       |        |       |        |       |
|-------------|----------|-----------|--------|-------|--------|-------|--------|-------|--------|-------|
| OLIGO_08412 | AW462414 | FAM53C    | 0.156  | 0.401 | 0.028  | 0.925 | -0.031 | 0.904 | -0.038 | 0.851 |
| OLIGO_08413 | AW462806 | FNTA      | 0.358  | 0.005 | -0.731 | 0.003 | -0.420 | 0.164 | -0.164 | 0.473 |
| OLIGO_08414 | AW465235 | S100A2    | 0.056  | 0.874 | 0.135  | 0.802 | -0.074 | 0.837 | 0.010  | 0.950 |
| OLIGO_08415 | AW462434 | SLC9A2    | -0.169 | 0.632 | -0.456 | 0.379 | -0.153 | 0.788 | 0.050  | 0.841 |
| OLIGO_08416 | AW464089 | TMEM127   | 0.138  | 0.438 | 0.163  | 0.789 | 0.355  | 0.543 | 0.296  | 0.308 |
| OLIGO_08419 | AW466128 | MGC10433  | 0.261  | 0.108 | 0.019  | 0.925 | -0.069 | 0.645 | 0.232  | 0.113 |
| OLIGO_08422 | AW462537 | SESN1     | 0.100  | 0.542 | 0.224  | 0.301 | 0.454  | 0.126 | 0.366  | 0.031 |
| OLIGO_08424 | AW462887 | ZFP64     | -0.067 | 0.654 | -0.182 | 0.647 | 0.210  | 0.349 | -0.656 | 0.004 |
| OLIGO_08425 | AW464722 | CALML5    | -0.113 | 0.773 | -0.084 | 0.758 | 0.301  | 0.287 | 0.117  | 0.474 |
| OLIGO_08426 | AW462588 | Zzef1     | 0.049  | 0.730 | -0.060 | 0.863 | -0.337 | 0.308 | -0.246 | 0.300 |
| OLIGO_08428 | AW462662 | NGLY1     | 0.276  | 0.247 | -0.417 | 0.227 | -0.339 | 0.288 | -0.069 | 0.738 |
| OLIGO_08430 | AW462851 | CRELD2    | -0.080 | 0.630 | 0.162  | 0.566 | 0.058  | 0.709 | 0.002  | 0.992 |
| OLIGO_08431 | AW462696 | SH3GLB2   | -0.112 | 0.619 | 0.006  | 0.990 | 0.415  | 0.279 | 0.272  | 0.472 |
| OLIGO_08433 | AW462717 | LOC51149  | 0.040  | 0.861 | -0.277 | 0.316 | 0.034  | 0.883 | -0.492 | 0.173 |
| OLIGO_08434 | AW462731 | CSNK1G3   | 0.052  | 0.744 | 0.050  | 0.828 | -0.067 | 0.788 | -0.294 | 0.126 |
| OLIGO_08437 | AW462713 | WARS2     | 0.123  | 0.625 | 0.505  | 0.227 | 0.309  | 0.280 | -0.036 | 0.871 |
| OLIGO_08439 | BF440215 | NFKBIA    | -0.002 | 0.989 | 0.547  | 0.079 | -0.090 | 0.422 | 0.687  | 0.002 |
| OLIGO_08442 | AW462786 | ZF        | -0.067 | 0.676 | 0.104  | 0.759 | -0.382 | 0.202 | -0.007 | 0.977 |
| OLIGO_08443 | AW462792 | MRPL32    | 0.293  | 0.120 | 0.526  | 0.049 | 0.189  | 0.221 | 0.273  | 0.091 |
| OLIGO_08445 | AW462812 | KLF9      | -0.066 | 0.754 | 0.543  | 0.467 | -1.290 | 0.095 | 0.084  | 0.840 |
| OLIGO_08446 | AW462824 | HMG20B    | -0.266 | 0.354 | -0.328 | 0.388 | 0.638  | 0.156 | -0.633 | 0.001 |
| OLIGO_08447 | AW462836 | ABHD10    | 0.117  | 0.532 | -0.543 | 0.097 | -0.510 | 0.086 | -0.307 | 0.315 |
| OLIGO_08448 | AW462842 | CDC42SE1  | -0.371 | 0.248 | -0.134 | 0.606 | -0.108 | 0.645 | -0.205 | 0.283 |
| OLIGO_08449 | AW462843 | CFLAR     | 0.027  | 0.928 | 0.552  | 0.097 | 0.176  | 0.407 | 0.292  | 0.113 |
| OLIGO_08450 | AW462861 | GBA       | 0.044  | 0.733 | 0.308  | 0.124 | 0.298  | 0.074 | 0.227  | 0.125 |
| OLIGO_08451 | AW462864 | PJA1      | 0.017  | 0.925 | 0.177  | 0.507 | 0.010  | 0.967 | 0.045  | 0.817 |
| OLIGO_08453 | AW462899 | NAPA      | 0.074  | 0.733 | 0.481  | 0.499 | 0.758  | 0.143 | 0.264  | 0.400 |
| OLIGO_08456 | AW463001 | TSCOT     | 0.042  | 0.856 | 0.344  | 0.087 | 0.169  | 0.590 | 0.106  | 0.618 |
| OLIGO_08459 | AW465690 | SLPI      | 0.078  | 0.742 | 0.311  | 0.343 | 0.186  | 0.434 | 0.110  | 0.625 |
| OLIGO_08461 | AW461437 | SERTAD1   | -0.214 | 0.109 | -0.009 | 0.976 | 0.288  | 0.156 | 0.133  | 0.601 |
| OLIGO_08462 | AW462669 | LRRC8E    | -0.192 | 0.358 | 0.114  | 0.750 | 0.206  | 0.568 | 0.592  | 0.070 |
| OLIGO_08463 | AW463564 | TMEM1     | -0.162 | 0.338 | 0.230  | 0.605 | -0.436 | 0.292 | -0.202 | 0.247 |
| OLIGO_08464 | AW465036 | TCAP      | -0.031 | 0.874 | 0.150  | 0.766 | 0.657  | 0.120 | -0.031 | 0.912 |
| OLIGO_08467 | AW463194 | ELK4      | -0.136 | 0.486 | 0.163  | 0.529 | 0.121  | 0.544 | 0.045  | 0.817 |
| OLIGO_08468 | AW463203 | CCDC68    | 0.134  | 0.760 | -0.075 | 0.745 | -0.252 | 0.094 | -0.136 | 0.706 |
| OLIGO_08469 | AW461969 | DPH2      | 0.147  | 0.249 | 0.051  | 0.840 | -0.165 | 0.457 | -0.191 | 0.520 |
| OLIGO_08470 | AW463210 | PLAUR     | -0.047 | 0.841 | -0.147 | 0.642 | -0.196 | 0.416 | 0.409  | 0.223 |
| OLIGO_08471 | AW462679 | ATP1B3    | 0.382  | 0.260 | -0.185 | 0.408 | -0.195 | 0.434 | -0.496 | 0.011 |
| OLIGO_08474 | AW463325 | BCCIP     | 0.037  | 0.789 | -0.209 | 0.468 | -0.048 | 0.850 | -0.242 | 0.211 |
| OLIGO_08475 | AW463204 | WBP4      | 0.095  | 0.585 | -0.817 | 0.086 | 0.109  | 0.560 | -0.240 | 0.277 |
| OLIGO_08476 | AW464610 | C11orf52  | 0.097  | 0.872 | -0.020 | 0.945 | 0.051  | 0.839 | -0.006 | 0.983 |
| OLIGO_08477 | AW463359 | PHB       | 0.037  | 0.886 | -0.067 | 0.808 | -0.174 | 0.283 | -0.168 | 0.256 |
| OLIGO_08478 | AW462714 | IL15RA    | -0.211 | 0.340 | 0.194  | 0.563 | -0.052 | 0.835 | -0.042 | 0.826 |
| OLIGO_08483 | AW463256 | HIC2      | 0.085  | 0.817 | -0.201 | 0.680 | 0.896  | 0.163 | -0.642 | 0.004 |
| OLIGO_08487 | AW465978 | GADD45A   | 0.093  | 0.557 | -0.606 | 0.253 | 0.335  | 0.289 | -0.307 | 0.260 |
| OLIGO_08490 | AW463397 | CAMKK1    | -0.259 | 0.136 | 0.098  | 0.608 | 0.043  | 0.748 | 0.342  | 0.036 |
| OLIGO_08493 | AW463423 | LOC511318 | 0.195  | 0.624 | -0.164 | 0.563 | 0.716  | 0.226 | 0.073  | 0.670 |
| OLIGO_08494 | AW463458 | UPK1B     | -0.156 | 0.496 | -0.892 | 0.180 | -0.288 | 0.655 | 0.061  | 0.724 |
| OLIGO_08495 | AW463465 | D6Wsu163e | -0.048 | 0.705 | -0.499 | 0.194 | 0.006  | 0.981 | -0.760 | 0.025 |
| OLIGO_08497 | AW463483 | FAM20C    | -0.215 | 0.622 | -0.093 | 0.760 | 0.179  | 0.510 | -0.022 | 0.914 |
| OLIGO_08498 | AW463485 | ELF2      | 0.143  | 0.603 | -0.222 | 0.320 | -0.245 | 0.133 | 0.236  | 0.196 |
| OLIGO_08499 | AW463544 | PCQAP     | -0.140 | 0.250 | 0.093  | 0.543 | 0.073  | 0.512 | -0.083 | 0.483 |
| OLIGO_08505 | AW463561 | NAPRT1    | -0.055 | 0.851 | -0.011 | 0.968 | -0.132 | 0.574 | -0.470 | 0.013 |
| OLIGO_08509 | BF440363 | PSMA3     | 0.490  | 0.044 | -0.747 | 0.030 | -0.329 | 0.222 | 0.223  | 0.274 |
| OLIGO_08510 | AW463587 | S100A14   | 0.097  | 0.670 | -0.148 | 0.471 | 0.300  | 0.211 | 0.126  | 0.324 |
| OLIGO_08514 | AW462876 | AKR1A1    | 0.043  | 0.874 | 0.162  | 0.572 | -0.224 | 0.303 | -0.577 | 0.002 |
| OLIGO_08515 | AW463620 | PSMF1     | 0.249  | 0.350 | -0.310 | 0.474 | 0.543  | 0.079 | 0.103  | 0.783 |
| OLIGO_08516 | AW463624 | SLC25A25  | -0.196 | 0.229 | 0.012  | 0.974 | -0.108 | 0.554 | -0.204 | 0.568 |
| OLIGO_08517 | AW463648 | CDH1      | 0.361  | 0.293 | 0.134  | 0.694 | 1.167  | 0.125 | 0.051  | 0.835 |
| OLIGO_08518 | AW463654 | MFN2      | 0.064  | 0.723 | 0.359  | 0.164 | 0.024  | 0.895 | 0.187  | 0.354 |

|             |          |           |        |       |        |       |        |       |        |       |
|-------------|----------|-----------|--------|-------|--------|-------|--------|-------|--------|-------|
| OLIGO_08523 | AW463646 | CXCL16    | 0.020  | 0.946 | -0.070 | 0.823 | 0.437  | 0.177 | -0.505 | 0.128 |
| OLIGO_08524 | AW462733 | RPN1      | 0.197  | 0.160 | -0.117 | 0.707 | -0.082 | 0.769 | -1.043 | 0.001 |
| OLIGO_08527 | AW463694 | ERCC1     | -0.120 | 0.674 | 0.143  | 0.641 | -0.437 | 0.192 | -0.508 | 0.015 |
| OLIGO_08529 | AW463709 | CTNS      | 0.170  | 0.552 | 0.099  | 0.789 | -0.179 | 0.535 | -0.180 | 0.600 |
| OLIGO_08530 | AW463814 | C17orf25  | 0.156  | 0.485 | -0.176 | 0.421 | -0.167 | 0.489 | -0.443 | 0.032 |
| OLIGO_08531 | AW462895 | CRIPT     | -0.025 | 0.955 | -0.259 | 0.429 | -0.088 | 0.726 | -0.321 | 0.066 |
| OLIGO_08532 | AW463718 | C20orf27  | -0.356 | 0.378 | 0.654  | 0.058 | 0.596  | 0.090 | 0.068  | 0.747 |
| OLIGO_08534 | AW463730 | TREX1     | -0.022 | 0.896 | 0.368  | 0.193 | 0.213  | 0.446 | 0.036  | 0.833 |
| OLIGO_08536 | AW464818 | ANKRD1    | -0.020 | 0.910 | 0.814  | 0.023 | -0.749 | 0.127 | -0.086 | 0.770 |
| OLIGO_08537 | AW465157 | SHOX2     | -0.277 | 0.555 | 0.369  | 0.208 | 0.032  | 0.787 | 0.031  | 0.819 |
| OLIGO_08540 | AW462038 | PLAU      | 0.350  | 0.134 | 0.195  | 0.393 | -0.067 | 0.697 | -0.010 | 0.969 |
| OLIGO_08541 | AW465041 | NTAN1     | -0.102 | 0.736 | 0.019  | 0.913 | -0.106 | 0.504 | -0.081 | 0.674 |
| OLIGO_08542 | AW463800 | NBR1      | -0.402 | 0.151 | -0.176 | 0.238 | -0.100 | 0.575 | 0.089  | 0.627 |
| OLIGO_08544 | AW463813 | LOC509687 | 0.104  | 0.704 | -0.576 | 0.236 | -0.093 | 0.849 | 0.100  | 0.723 |
| OLIGO_08545 | AW463819 | ZDHHC4    | 0.067  | 0.700 | 0.359  | 0.074 | 0.196  | 0.198 | 0.119  | 0.542 |
| OLIGO_08546 | AW463832 | FOSB      | -0.007 | 0.959 | 0.281  | 0.242 | 0.192  | 0.403 | 0.115  | 0.453 |
| OLIGO_08550 | AW463889 | ADAMTSL5  | -0.026 | 0.849 | -0.087 | 0.736 | -0.231 | 0.345 | -0.083 | 0.706 |
| OLIGO_08551 | AW463944 | KLC4      | -0.014 | 0.925 | 0.341  | 0.291 | -0.187 | 0.490 | -0.353 | 0.074 |
| OLIGO_08552 | AW463945 | GABARAPL2 | 0.368  | 0.006 | 0.061  | 0.834 | -0.330 | 0.294 | 0.476  | 0.093 |
| OLIGO_08553 | AW463950 | C1orf128  | 0.096  | 0.374 | -0.027 | 0.907 | -0.306 | 0.072 | -0.459 | 0.014 |
| OLIGO_08556 | AW464030 | MX1       | -0.204 | 0.566 | 0.223  | 0.605 | -0.225 | 0.429 | 0.307  | 0.280 |
| OLIGO_08557 | AW464044 | RAB33A    | -0.145 | 0.645 | 0.013  | 0.976 | 0.186  | 0.336 | 0.245  | 0.196 |
| OLIGO_08559 | AW462809 | C10orf35  | -0.547 | 0.008 | 0.124  | 0.530 | 0.014  | 0.936 | -0.051 | 0.756 |
| OLIGO_08568 | AW464744 | Sdc4      | 0.093  | 0.749 | 0.081  | 0.863 | 0.339  | 0.429 | 0.161  | 0.633 |
| OLIGO_08574 | AW462310 | IER5L     | 0.013  | 0.915 | 0.272  | 0.452 | 0.138  | 0.628 | -0.170 | 0.305 |
| OLIGO_08575 | AW464319 | FANCE     | -0.015 | 0.894 | -0.059 | 0.687 | -0.415 | 0.014 | -0.269 | 0.087 |
| OLIGO_08576 | AW462182 | PLAT      | 0.087  | 0.708 | -0.093 | 0.728 | -0.505 | 0.074 | 0.689  | 0.002 |
| OLIGO_08577 | AW464367 | GJB5      | 0.313  | 0.314 | -0.272 | 0.494 | -0.013 | 0.943 | -0.040 | 0.744 |
| OLIGO_08579 | AW464382 | DIABLO    | 0.039  | 0.780 | 0.101  | 0.742 | -0.118 | 0.692 | -0.534 | 0.008 |
| OLIGO_08580 | AW464390 | PXMP4     | -0.319 | 0.171 | -0.120 | 0.619 | 0.132  | 0.586 | -0.034 | 0.858 |
| OLIGO_08581 | AW464393 | YKT6      | 0.139  | 0.422 | 0.079  | 0.646 | 0.412  | 0.003 | -0.005 | 0.976 |
| OLIGO_08586 | AW464427 | SAE1      | -0.429 | 0.084 | 0.010  | 0.964 | -0.180 | 0.374 | -0.172 | 0.234 |
| OLIGO_08587 | AW462067 | COMMD9    | -0.009 | 0.939 | 0.444  | 0.227 | 0.418  | 0.210 | -0.005 | 0.980 |
| OLIGO_08590 | AW464517 | LOC522854 | -0.018 | 0.887 | 0.147  | 0.591 | -0.190 | 0.369 | 0.142  | 0.384 |
| OLIGO_08591 | AW464548 | CTSK      | -0.319 | 0.200 | -0.115 | 0.787 | -0.208 | 0.319 | -0.110 | 0.714 |
| OLIGO_08592 | AW464552 | BTBD10    | -0.060 | 0.731 | -0.012 | 0.969 | -0.149 | 0.607 | -0.325 | 0.089 |
| OLIGO_08593 | AW464561 | PIK3C2G   | -0.133 | 0.775 | -0.570 | 0.202 | 0.645  | 0.479 | -0.068 | 0.814 |
| OLIGO_08594 | AW464502 | SRPRB     | 0.090  | 0.729 | -0.551 | 0.026 | 0.391  | 0.084 | -0.230 | 0.355 |
| OLIGO_08599 | AW464700 | GCN5L2    | -0.037 | 0.829 | 0.332  | 0.238 | 0.074  | 0.653 | -0.412 | 0.025 |
| OLIGO_08600 | AW462770 | MGC3265   | 0.082  | 0.625 | 0.038  | 0.908 | -0.423 | 0.053 | 0.240  | 0.368 |
| OLIGO_08602 | AW464749 | PPIC      | 0.083  | 0.558 | 0.338  | 0.519 | 0.746  | 0.134 | -0.317 | 0.356 |
| OLIGO_08604 | AW464777 | ANKRD16   | 0.398  | 0.073 | 0.015  | 0.977 | -0.070 | 0.840 | 0.018  | 0.933 |
| OLIGO_08605 | AW464947 | VPRBP     | -0.169 | 0.605 | -0.704 | 0.003 | 0.076  | 0.722 | -0.032 | 0.880 |
| OLIGO_08606 | AW464950 | SUV420H1  | 0.136  | 0.387 | -0.339 | 0.065 | 0.054  | 0.772 | 0.085  | 0.649 |
| OLIGO_08607 | AW464985 | USP9X     | 0.106  | 0.453 | -0.413 | 0.090 | 0.092  | 0.696 | 0.459  | 0.081 |
| OLIGO_08608 | AW462778 | MMACHC    | -0.149 | 0.525 | -0.170 | 0.378 | -0.044 | 0.700 | -0.129 | 0.397 |
| OLIGO_08609 | AW465099 | MFSD5     | 0.017  | 0.920 | 0.074  | 0.710 | -0.158 | 0.150 | 0.081  | 0.478 |
| OLIGO_08610 | AW463090 | DDIT3     | 0.089  | 0.590 | 0.096  | 0.807 | -0.203 | 0.308 | -0.152 | 0.384 |
| OLIGO_08611 | AW465123 | TRIP12    | 0.429  | 0.020 | -0.572 | 0.076 | 0.114  | 0.656 | 0.627  | 0.019 |
| OLIGO_08612 | AW465131 | GUK1      | -0.144 | 0.274 | -0.069 | 0.725 | -0.219 | 0.069 | -0.413 | 0.027 |
| OLIGO_08617 | AW465161 | TNFAIP3   | 0.127  | 0.451 | 0.484  | 0.258 | 0.198  | 0.396 | 0.028  | 0.875 |
| OLIGO_08621 | AW465261 | MYOZ1     | 0.172  | 0.663 | 0.290  | 0.385 | -0.358 | 0.029 | 0.188  | 0.444 |
| OLIGO_08622 | AW465265 | QPCTL     | 0.064  | 0.687 | 0.256  | 0.315 | -0.021 | 0.858 | -0.239 | 0.056 |
| OLIGO_08624 | AW465274 | AAK1      | -0.378 | 0.445 | 0.475  | 0.078 | 0.346  | 0.248 | 0.070  | 0.723 |
| OLIGO_08628 | AW465307 | LPP       | -0.557 | 0.164 | 0.652  | 0.153 | 0.077  | 0.736 | 0.212  | 0.273 |
| OLIGO_08631 | AW465320 | TGFBR2    | -0.584 | 0.422 | 0.395  | 0.202 | 0.042  | 0.767 | 0.286  | 0.059 |
| OLIGO_08633 | AW465357 | MBNL1     | 0.213  | 0.532 | 0.274  | 0.473 | 0.008  | 0.974 | 0.398  | 0.148 |
| OLIGO_08637 | AW465410 | Pcd6      | 0.048  | 0.811 | -0.181 | 0.530 | 0.253  | 0.272 | -0.254 | 0.182 |
| OLIGO_08638 | AW465429 | YTHDF2    | 0.041  | 0.786 | -0.095 | 0.653 | 0.128  | 0.532 | -0.615 | 0.002 |
| OLIGO_08640 | AW462694 | ZNF333    | 0.148  | 0.839 | 0.111  | 0.788 | -0.362 | 0.154 | -0.531 | 0.129 |

|             |          |           |        |       |        |       |        |       |        |       |
|-------------|----------|-----------|--------|-------|--------|-------|--------|-------|--------|-------|
| OLIGO_08643 | AW465570 | SH3D19    | 0.076  | 0.624 | 0.085  | 0.753 | 0.119  | 0.570 | 0.093  | 0.692 |
| OLIGO_08644 | AW465577 | OTUB1     | -0.236 | 0.033 | 0.199  | 0.336 | 0.425  | 0.090 | -0.114 | 0.448 |
| OLIGO_08647 | AW465471 | PSMB5     | 0.263  | 0.251 | 0.048  | 0.900 | 0.384  | 0.275 | 0.070  | 0.725 |
| OLIGO_08648 | AW465475 | INSIG2    | 0.179  | 0.435 | -0.026 | 0.917 | -0.180 | 0.287 | -0.041 | 0.840 |
| OLIGO_08650 | AW463027 | C11orf73  | 0.022  | 0.935 | -0.042 | 0.896 | -0.405 | 0.202 | -0.442 | 0.040 |
| OLIGO_08652 | AW464924 | LOC93343  | -0.075 | 0.589 | 0.461  | 0.053 | 0.260  | 0.230 | -0.012 | 0.960 |
| OLIGO_08654 | AW465595 | TSPAN14   | 0.001  | 0.997 | -0.301 | 0.369 | 0.604  | 0.097 | 0.032  | 0.863 |
| OLIGO_08655 | AW461759 | SIGIRR    | -0.125 | 0.723 | 0.003  | 0.993 | 0.156  | 0.603 | 0.162  | 0.608 |
| OLIGO_08657 | AW465613 | HSPA14    | -0.248 | 0.488 | -0.152 | 0.599 | -0.196 | 0.279 | -0.143 | 0.464 |
| OLIGO_08658 | AW465616 | TRIM24    | 0.113  | 0.683 | -0.425 | 0.322 | 0.212  | 0.232 | 0.176  | 0.305 |
| OLIGO_08662 | AW462747 | PLS3      | -0.174 | 0.355 | -0.061 | 0.798 | -1.131 | 0.007 | -0.178 | 0.395 |
| OLIGO_08664 | AW465770 | SPEN      | -0.087 | 0.651 | -0.232 | 0.383 | 0.111  | 0.430 | 0.280  | 0.031 |
| OLIGO_08666 | AW465784 | FAU       | -0.425 | 0.290 | 0.443  | 0.280 | -0.036 | 0.874 | 0.381  | 0.107 |
| OLIGO_08667 | AW465789 | PTDSS1    | -0.200 | 0.479 | -0.121 | 0.525 | 0.088  | 0.569 | -0.201 | 0.184 |
| OLIGO_08668 | AW465807 | CSNK1A1   | -0.121 | 0.275 | -0.314 | 0.353 | 0.508  | 0.141 | 0.415  | 0.048 |
| OLIGO_08669 | AW465808 | LRRRC51   | -0.573 | 0.163 | -0.030 | 0.928 | -0.048 | 0.675 | -0.556 | 0.051 |
| OLIGO_08670 | AW465812 | ECHDC2    | -0.111 | 0.507 | 0.003  | 0.993 | 0.039  | 0.811 | 0.071  | 0.573 |
| OLIGO_08673 | AW465847 | CSNK1E    | 0.049  | 0.837 | 0.038  | 0.861 | -0.167 | 0.352 | -0.171 | 0.217 |
| OLIGO_08674 | AW463856 | ERGIC3    | -0.011 | 0.952 | -0.015 | 0.957 | 0.405  | 0.056 | -0.164 | 0.343 |
| OLIGO_08675 | AW465881 | NFKB1     | -0.267 | 0.464 | 0.188  | 0.370 | -0.037 | 0.833 | 0.433  | 0.113 |
| OLIGO_08677 | AW465892 | MPG       | -0.035 | 0.841 | -0.113 | 0.548 | 0.043  | 0.817 | 0.162  | 0.252 |
| OLIGO_08680 | AW465924 | LOC513673 | -0.047 | 0.757 | -0.098 | 0.551 | 0.088  | 0.487 | -0.003 | 0.983 |
| OLIGO_08681 | AW465947 | CAPN2     | -0.021 | 0.909 | -0.131 | 0.575 | 0.291  | 0.311 | -0.295 | 0.072 |
| OLIGO_08686 | AW461457 | CXorf56   | -0.032 | 0.862 | -0.165 | 0.544 | -0.163 | 0.388 | -0.387 | 0.032 |
| OLIGO_08688 | AW466138 | Als4      | -0.093 | 0.625 | -0.087 | 0.664 | 0.072  | 0.788 | 0.361  | 0.008 |
| OLIGO_08689 | AW466145 | CD48      | -0.198 | 0.680 | -0.136 | 0.505 | 0.235  | 0.474 | -0.057 | 0.799 |
| OLIGO_08690 | AW466182 | LOC529905 | -0.299 | 0.116 | 0.158  | 0.511 | 0.045  | 0.792 | 0.002  | 0.991 |
| OLIGO_08691 | AW466195 | EDF1      | -0.107 | 0.514 | 0.004  | 0.988 | 0.143  | 0.463 | 0.008  | 0.964 |
| OLIGO_08693 | BF044651 | SURF2     | 0.019  | 0.938 | 0.014  | 0.968 | 0.074  | 0.733 | 0.110  | 0.570 |
| OLIGO_08696 | BF040821 | PTDSR     | -0.117 | 0.562 | 0.398  | 0.314 | -0.190 | 0.301 | -0.069 | 0.589 |
| OLIGO_08697 | BF041669 | LOC511319 | 0.009  | 0.953 | 0.569  | 0.034 | -0.159 | 0.484 | -0.231 | 0.123 |
| OLIGO_08698 | BF046735 | C12orf43  | -0.314 | 0.624 | -0.116 | 0.724 | 0.125  | 0.411 | -0.461 | 0.075 |
| OLIGO_08699 | BF039051 | PYCR2     | 0.417  | 0.135 | -0.640 | 0.073 | -0.034 | 0.910 | -0.516 | 0.064 |
| OLIGO_08702 | BF041539 | PODXL2    | -0.058 | 0.660 | 0.055  | 0.926 | 0.642  | 0.100 | 0.325  | 0.280 |
| OLIGO_08705 | BF039557 | CYP3A4    | 0.218  | 0.442 | 0.226  | 0.524 | 0.010  | 0.962 | -0.306 | 0.157 |
| OLIGO_08706 | BF041636 | SLC7A4    | 0.020  | 0.911 | 0.246  | 0.597 | 0.418  | 0.136 | -0.082 | 0.839 |
| OLIGO_08707 | BF040324 | LOC441150 | -0.046 | 0.769 | 0.253  | 0.458 | -0.369 | 0.165 | -0.398 | 0.105 |
| OLIGO_08708 | BF045050 | LPGAT1    | 0.055  | 0.706 | 0.262  | 0.423 | 0.166  | 0.493 | -0.466 | 0.017 |
| OLIGO_08710 | AW463245 | BAIAP2    | -0.205 | 0.298 | 0.011  | 0.968 | -0.157 | 0.263 | 0.094  | 0.553 |
| OLIGO_08711 | BF040744 | PHYH      | -0.411 | 0.232 | 0.180  | 0.649 | -0.184 | 0.291 | -0.599 | 0.012 |
| OLIGO_08713 | AW462639 | SIAHBP1   | 0.122  | 0.557 | -0.136 | 0.655 | 0.074  | 0.757 | -0.102 | 0.552 |
| OLIGO_08714 | AW462706 | MOBK1B    | 0.034  | 0.857 | -0.253 | 0.278 | -0.208 | 0.336 | 0.255  | 0.308 |
| OLIGO_08715 | AW463167 | C20orf43  | 0.047  | 0.782 | 0.006  | 0.982 | -0.324 | 0.124 | -0.375 | 0.132 |
| OLIGO_08717 | AW463120 | UBE2S     | 0.120  | 0.500 | 0.377  | 0.254 | 0.105  | 0.652 | 0.206  | 0.395 |
| OLIGO_08718 | AW463052 | HSPC111   | 0.108  | 0.443 | 0.272  | 0.328 | -0.313 | 0.233 | -0.299 | 0.068 |
| OLIGO_08721 | BF042633 | UBE2L6    | -0.233 | 0.592 | -0.335 | 0.309 | 0.129  | 0.665 | -0.434 | 0.322 |
| OLIGO_08722 | AW463051 | FH        | -0.026 | 0.938 | -0.262 | 0.299 | -0.385 | 0.208 | -0.732 | 0.005 |
| OLIGO_08723 | BF039466 | UNG2      | 0.120  | 0.421 | 0.736  | 0.134 | 0.077  | 0.765 | -0.223 | 0.458 |
| OLIGO_08726 | BF040848 | DC-UbP    | -0.177 | 0.423 | 0.580  | 0.096 | 0.447  | 0.144 | -0.162 | 0.478 |
| OLIGO_08727 | BF040841 | NRG2      | -0.346 | 0.018 | 0.538  | 0.384 | 0.495  | 0.340 | -0.208 | 0.555 |
| OLIGO_08729 | AW463061 | DREV1     | 0.181  | 0.501 | 0.320  | 0.327 | -0.410 | 0.250 | 0.206  | 0.501 |
| OLIGO_08730 | BF040069 | EFNA1     | -0.198 | 0.442 | 0.477  | 0.199 | -0.052 | 0.800 | -0.029 | 0.886 |
| OLIGO_08732 | AW465588 | PPGB      | -0.230 | 0.258 | -0.029 | 0.898 | 0.281  | 0.450 | 0.185  | 0.413 |
| OLIGO_08735 | BF039167 | NDUFA7    | -0.004 | 0.985 | -0.105 | 0.681 | 0.084  | 0.725 | -0.338 | 0.083 |
| OLIGO_08737 | BF044699 | FEM1B     | -0.243 | 0.679 | 0.427  | 0.189 | -0.053 | 0.861 | 0.146  | 0.492 |
| OLIGO_08738 | BF043224 | GATA6     | 0.266  | 0.607 | -0.242 | 0.767 | 0.823  | 0.269 | 0.394  | 0.316 |
| OLIGO_08739 | BF045667 | CTSL      | 0.323  | 0.334 | 0.618  | 0.175 | -0.281 | 0.560 | 0.415  | 0.192 |
| OLIGO_08745 | BF039386 | COG2      | 0.041  | 0.793 | -0.223 | 0.341 | -0.385 | 0.067 | -0.302 | 0.078 |
| OLIGO_08747 | BF045735 | TMPIT     | -0.046 | 0.833 | 0.418  | 0.147 | 0.419  | 0.146 | -0.844 | 0.015 |
| OLIGO_08754 | BF044230 | AP4S1     | 0.178  | 0.328 | -0.169 | 0.527 | 0.217  | 0.263 | -0.139 | 0.482 |

|             |          |               |        |       |        |       |        |       |        |       |
|-------------|----------|---------------|--------|-------|--------|-------|--------|-------|--------|-------|
| OLIGO_08755 | AW463988 | SPA17         | -0.076 | 0.524 | 0.150  | 0.366 | -0.045 | 0.801 | -0.602 | 0.004 |
| OLIGO_08757 | AW465512 | FAM96A        | 0.156  | 0.253 | -0.380 | 0.208 | -0.081 | 0.765 | -0.410 | 0.061 |
| OLIGO_08758 | BF040104 | 4932441K18Rik | -0.042 | 0.846 | -0.143 | 0.578 | -0.497 | 0.067 | -0.558 | 0.017 |
| OLIGO_08759 | BF046502 | HEXIM2        | -0.090 | 0.776 | -0.221 | 0.241 | 0.590  | 0.195 | -0.595 | 0.078 |
| OLIGO_08760 | BF045561 | SNF8          | -0.062 | 0.838 | 0.443  | 0.204 | -0.217 | 0.428 | 0.171  | 0.515 |
| OLIGO_08764 | BF042692 | PTPN3         | -0.253 | 0.347 | 0.177  | 0.382 | -0.061 | 0.830 | -0.399 | 0.152 |
| OLIGO_08765 | BF044967 | AGGF1         | 0.042  | 0.785 | -0.256 | 0.366 | -0.185 | 0.168 | -0.019 | 0.919 |
| OLIGO_08766 | BF039213 | NUDT4         | 0.066  | 0.762 | -0.044 | 0.843 | -0.273 | 0.229 | -0.068 | 0.662 |
| OLIGO_08770 | BF044220 | ZNF131        | 0.018  | 0.928 | -0.139 | 0.679 | -0.294 | 0.277 | -0.697 | 0.003 |
| OLIGO_08771 | BF044239 | SYAP1         | 0.214  | 0.178 | -0.193 | 0.526 | 0.026  | 0.910 | -0.091 | 0.687 |
| OLIGO_08772 | BF046594 | TMEM134       | -0.064 | 0.752 | 0.040  | 0.944 | 0.675  | 0.184 | 0.491  | 0.099 |
| OLIGO_08773 | BF040257 | CCT4          | 0.271  | 0.130 | -0.442 | 0.339 | -0.497 | 0.234 | 0.054  | 0.845 |
| OLIGO_08774 | BF045981 | GNAT1         | -0.386 | 0.403 | -0.192 | 0.493 | 0.166  | 0.482 | -0.353 | 0.229 |
| OLIGO_08775 | BF044286 | ECD           | 0.254  | 0.256 | -0.140 | 0.477 | 0.076  | 0.726 | -0.193 | 0.236 |
| OLIGO_08776 | BF044285 | SPIRE1        | -0.088 | 0.482 | 0.338  | 0.350 | 0.138  | 0.598 | 0.017  | 0.937 |
| OLIGO_08777 | BF044467 | TMEM126B      | -0.109 | 0.467 | -0.158 | 0.626 | -0.409 | 0.160 | -0.414 | 0.045 |
| OLIGO_08778 | AW464166 | HIST1H1D      | 0.434  | 0.144 | -0.571 | 0.138 | 0.319  | 0.111 | 0.109  | 0.537 |
| OLIGO_08779 | BF042469 | LOC618450     | -0.014 | 0.916 | 0.152  | 0.477 | 0.209  | 0.274 | -0.235 | 0.290 |
| OLIGO_08780 | AW463035 | STARD7        | -0.034 | 0.797 | -0.028 | 0.894 | -0.061 | 0.691 | -0.334 | 0.003 |
| OLIGO_08781 | BF044457 | ZNF652        | -0.069 | 0.670 | -0.309 | 0.170 | -0.071 | 0.696 | -0.242 | 0.236 |
| OLIGO_08782 | BF041775 | GTL3          | 0.002  | 0.984 | -0.022 | 0.897 | -0.416 | 0.034 | -0.300 | 0.034 |
| OLIGO_08788 | BF040001 | SLC35E1       | -0.175 | 0.168 | -0.052 | 0.810 | -0.236 | 0.181 | -0.196 | 0.183 |
| OLIGO_08789 | AW463067 | PPP2R2A       | -0.105 | 0.487 | 0.067  | 0.754 | -0.308 | 0.074 | -0.316 | 0.020 |
| OLIGO_08790 | BF042420 | PHLDB1        | -0.261 | 0.309 | 0.140  | 0.429 | -0.446 | 0.129 | 0.071  | 0.575 |
| OLIGO_08791 | BF042465 | GRHL2         | 0.228  | 0.567 | -0.338 | 0.302 | -0.151 | 0.488 | 0.250  | 0.113 |
| OLIGO_08792 | BF042292 | DNAJC1        | -0.089 | 0.716 | 0.113  | 0.731 | 0.012  | 0.964 | -0.683 | 0.001 |
| OLIGO_08794 | AW461580 | LOC509011     | -0.159 | 0.247 | -0.101 | 0.808 | 0.010  | 0.963 | -0.133 | 0.533 |
| OLIGO_08796 | BF042287 | LOC536377     | 0.229  | 0.275 | 0.068  | 0.866 | 0.357  | 0.140 | 0.611  | 0.021 |
| OLIGO_08797 | BF042289 | HMX2          | -0.495 | 0.035 | 0.270  | 0.217 | -0.068 | 0.714 | 0.453  | 0.156 |
| OLIGO_08800 | BF042429 | EME1          | 0.007  | 0.954 | -0.223 | 0.485 | 0.055  | 0.879 | -0.277 | 0.161 |
| OLIGO_08804 | AW465186 | SLC31A2       | 0.129  | 0.578 | 0.078  | 0.628 | 0.096  | 0.547 | 0.091  | 0.624 |
| OLIGO_08805 | BF040529 | CGB7          | -0.117 | 0.714 | -0.200 | 0.397 | 0.027  | 0.862 | -0.454 | 0.132 |
| OLIGO_08806 | BF040363 | SRP19         | 0.135  | 0.506 | 0.007  | 0.979 | 0.131  | 0.524 | -0.243 | 0.236 |
| OLIGO_08807 | BF040540 | NTE           | -0.441 | 0.420 | 0.338  | 0.500 | 0.289  | 0.195 | -0.430 | 0.216 |
| OLIGO_08810 | BF039876 | FLNA          | -0.015 | 0.919 | -0.136 | 0.751 | 0.013  | 0.976 | -0.015 | 0.955 |
| OLIGO_08812 | BF040535 | CDC42EP1      | 0.178  | 0.264 | -0.079 | 0.727 | -0.172 | 0.219 | -0.082 | 0.641 |
| OLIGO_08814 | BF040383 | GLO1          | 0.103  | 0.488 | 0.112  | 0.693 | 0.071  | 0.788 | -0.450 | 0.038 |
| OLIGO_08815 | BF041392 | ZNF322A       | -0.518 | 0.175 | 0.476  | 0.357 | -0.179 | 0.467 | 0.147  | 0.539 |
| OLIGO_08817 | BF045955 | MGC15875      | 0.049  | 0.853 | 0.018  | 0.979 | -0.014 | 0.975 | -1.165 | 0.024 |
| OLIGO_08818 | BF046020 | FBXO9         | -0.132 | 0.751 | -0.387 | 0.162 | -0.424 | 0.272 | -0.006 | 0.981 |
| OLIGO_08820 | AW463838 | LOC124446     | 0.020  | 0.890 | 0.651  | 0.150 | 0.022  | 0.915 | 0.426  | 0.133 |
| OLIGO_08821 | BF046000 | HSPB3         | -0.568 | 0.256 | 0.279  | 0.556 | -0.343 | 0.250 | 0.259  | 0.497 |
| OLIGO_08822 | AW463046 | KIAA1704      | 0.226  | 0.406 | 0.826  | 0.165 | -0.121 | 0.804 | 0.581  | 0.022 |
| OLIGO_08823 | BF045999 | NDUFB11       | 0.160  | 0.255 | 0.796  | 0.076 | 0.232  | 0.212 | -0.151 | 0.349 |
| OLIGO_08824 | BF046010 | FAM50A        | 0.095  | 0.507 | 0.509  | 0.204 | -0.221 | 0.423 | -0.202 | 0.366 |
| OLIGO_08826 | BF045971 | C1orf9        | 0.160  | 0.494 | 0.542  | 0.280 | 0.444  | 0.171 | 0.578  | 0.012 |
| OLIGO_08827 | BF046015 | SDHA          | 0.181  | 0.133 | -0.085 | 0.730 | 0.259  | 0.297 | -0.132 | 0.646 |
| OLIGO_08828 | BF043677 | KIF26A        | 0.101  | 0.621 | -0.188 | 0.498 | -0.188 | 0.444 | -0.322 | 0.198 |
| OLIGO_08830 | BF043113 | KCNK1         | -0.042 | 0.863 | -0.088 | 0.645 | -0.200 | 0.418 | -0.254 | 0.212 |
| OLIGO_08831 | BF045271 | SMARCA3       | 0.026  | 0.934 | -0.469 | 0.133 | -0.711 | 0.139 | -1.161 | 0.009 |
| OLIGO_08832 | BF046145 | LOC526200     | -0.059 | 0.689 | 0.600  | 0.169 | 0.184  | 0.406 | 0.117  | 0.571 |
| OLIGO_08833 | AW465216 | SLC3A2        | -0.354 | 0.227 | 0.715  | 0.114 | 0.327  | 0.292 | 0.286  | 0.141 |
| OLIGO_08835 | BF046135 | TRIM71        | 0.306  | 0.230 | -0.051 | 0.930 | -0.107 | 0.776 | 0.047  | 0.876 |
| OLIGO_08837 | BF044100 | PDGFA         | -0.034 | 0.835 | 0.064  | 0.780 | -0.175 | 0.473 | -0.195 | 0.475 |
| OLIGO_08838 | BF043910 | PSEN2         | 0.136  | 0.308 | -0.096 | 0.561 | 1.574  | 0.010 | -0.495 | 0.062 |
| OLIGO_08840 | BF043917 | GPATC1        | 0.058  | 0.659 | 0.035  | 0.805 | -0.067 | 0.705 | -0.184 | 0.260 |
| OLIGO_08841 | BF043916 | TADA1L        | -0.017 | 0.920 | -0.014 | 0.949 | -0.405 | 0.180 | -0.322 | 0.036 |
| OLIGO_08842 | BF044052 | LIMK2         | -0.500 | 0.123 | -0.086 | 0.679 | 0.318  | 0.398 | -0.166 | 0.383 |
| OLIGO_08844 | BF044056 | TADA3L        | -0.013 | 0.974 | 0.087  | 0.771 | -0.410 | 0.198 | -0.080 | 0.698 |
| OLIGO_08846 | BF043915 | C3orf21       | 0.616  | 0.375 | 0.189  | 0.699 | -0.305 | 0.534 | -0.284 | 0.335 |

|             |          |               |        |       |        |       |        |       |        |       |
|-------------|----------|---------------|--------|-------|--------|-------|--------|-------|--------|-------|
| OLIGO_08849 | BF044050 | SYT4          | -0.240 | 0.627 | 0.237  | 0.522 | -0.148 | 0.667 | -0.241 | 0.365 |
| OLIGO_08854 | BF044067 | PVT1          | -0.337 | 0.254 | -0.332 | 0.178 | -0.838 | 0.050 | -0.475 | 0.037 |
| OLIGO_08857 | BF044082 | TCEB3         | -0.169 | 0.600 | -0.013 | 0.966 | 0.580  | 0.026 | 0.253  | 0.292 |
| OLIGO_08858 | BF045001 | BAIAP2L1      | 0.002  | 0.995 | 0.176  | 0.376 | 0.780  | 0.152 | -0.045 | 0.835 |
| OLIGO_08859 | BF044073 | RBM33         | -0.196 | 0.400 | 0.257  | 0.208 | -0.106 | 0.601 | -0.097 | 0.549 |
| OLIGO_08860 | AW463047 | WDR51A        | -0.058 | 0.764 | 0.124  | 0.571 | -0.143 | 0.516 | -0.603 | 0.000 |
| OLIGO_08861 | BF043912 | ANKRD15       | 0.028  | 0.819 | 0.103  | 0.621 | -0.436 | 0.106 | 0.259  | 0.111 |
| OLIGO_08863 | BF040995 | TMEM121       | -0.131 | 0.757 | 0.350  | 0.081 | 0.103  | 0.691 | -0.442 | 0.159 |
| OLIGO_08864 | BF044063 | SERPINB5      | 0.105  | 0.703 | -0.119 | 0.641 | -0.104 | 0.792 | -0.445 | 0.025 |
| OLIGO_08869 | BF042150 | SLC16A7       | -0.596 | 0.169 | -0.208 | 0.546 | 0.203  | 0.466 | 0.052  | 0.838 |
| OLIGO_08870 | BF042181 | HAGH          | 0.166  | 0.528 | -0.012 | 0.974 | -0.495 | 0.093 | -0.320 | 0.096 |
| OLIGO_08872 | AW463008 | UBE2N         | -0.030 | 0.861 | 0.021  | 0.865 | -0.141 | 0.319 | -0.120 | 0.423 |
| OLIGO_08874 | BF042165 | PDCD8         | 0.173  | 0.286 | -0.276 | 0.436 | -0.085 | 0.756 | -0.415 | 0.067 |
| OLIGO_08875 | BF043005 | PTD004        | -0.124 | 0.529 | -0.182 | 0.579 | -0.069 | 0.845 | -0.259 | 0.158 |
| OLIGO_08879 | BF040171 | ABHD2         | -0.181 | 0.577 | 0.353  | 0.328 | 0.801  | 0.120 | 0.077  | 0.792 |
| OLIGO_08880 | BF040645 | RALBP1        | -0.087 | 0.749 | -0.093 | 0.661 | 0.345  | 0.161 | 0.145  | 0.300 |
| OLIGO_08881 | BF043599 | ATAD4         | -0.108 | 0.467 | 0.029  | 0.947 | -0.313 | 0.187 | -0.093 | 0.632 |
| OLIGO_08882 | BF043494 | CBFA2T3       | -0.587 | 0.000 | 0.307  | 0.199 | 0.006  | 0.980 | 0.000  | 1.000 |
| OLIGO_08885 | AW464826 | C19orf10      | -0.144 | 0.580 | -0.280 | 0.088 | 0.416  | 0.198 | -0.125 | 0.238 |
| OLIGO_08888 | BF042183 | SNX3          | 0.128  | 0.350 | 0.089  | 0.741 | -0.365 | 0.151 | -0.511 | 0.005 |
| OLIGO_08889 | BF041602 | MGC42367      | -0.168 | 0.514 | 0.358  | 0.446 | -0.099 | 0.647 | -0.624 | 0.029 |
| OLIGO_08890 | BF044384 | 3110050K21Rik | 0.000  | 0.999 | 0.156  | 0.643 | 0.703  | 0.065 | -0.438 | 0.053 |
| OLIGO_08892 | BF041765 | GAL3ST1       | -0.113 | 0.585 | 0.059  | 0.856 | -0.305 | 0.373 | 0.166  | 0.509 |
| OLIGO_08893 | AW462980 | ZUBR1         | 0.083  | 0.460 | -0.030 | 0.875 | -0.066 | 0.760 | -0.286 | 0.103 |
| OLIGO_08894 | BF043720 | TBC1D8        | -0.103 | 0.470 | -0.152 | 0.559 | -0.056 | 0.822 | -0.208 | 0.392 |
| OLIGO_08896 | BF043732 | LHFP          | 0.021  | 0.939 | -0.120 | 0.692 | -0.102 | 0.691 | 0.287  | 0.088 |
| OLIGO_08899 | BF039559 | CD300A        | 0.139  | 0.397 | -0.022 | 0.933 | -0.249 | 0.058 | -0.415 | 0.223 |
| OLIGO_08900 | BF046459 | TRPV6         | 0.012  | 0.927 | -0.113 | 0.595 | -0.432 | 0.012 | -0.125 | 0.235 |
| OLIGO_08901 | BF040747 | POLE3         | -0.083 | 0.621 | 0.098  | 0.660 | -0.694 | 0.029 | -0.415 | 0.020 |
| OLIGO_08904 | BF041938 | APIP          | 0.336  | 0.109 | -0.797 | 0.002 | -0.091 | 0.639 | 0.052  | 0.817 |
| OLIGO_08906 | BF044625 | SLC4A3        | 0.082  | 0.659 | -0.168 | 0.520 | -0.249 | 0.019 | -0.325 | 0.149 |
| OLIGO_08909 | BF039717 | C10orf58      | 0.078  | 0.784 | -0.139 | 0.769 | 0.943  | 0.194 | -0.372 | 0.199 |
| OLIGO_08910 | BF040243 | PARD6B        | -0.153 | 0.564 | -0.046 | 0.895 | 0.833  | 0.113 | -0.546 | 0.016 |
| OLIGO_08911 | AW466023 | SF3B1         | 0.413  | 0.058 | 0.471  | 0.390 | 0.039  | 0.888 | 0.244  | 0.293 |
| OLIGO_08912 | BF045387 | RBM15B        | -0.471 | 0.290 | -0.094 | 0.698 | -0.110 | 0.663 | -0.307 | 0.077 |
| OLIGO_08913 | BF043090 | DHX34         | 0.325  | 0.322 | -0.145 | 0.471 | -0.229 | 0.161 | -0.458 | 0.138 |
| OLIGO_08914 | BF043072 | RAB34         | -0.122 | 0.739 | -0.236 | 0.303 | 0.158  | 0.596 | -0.340 | 0.081 |
| OLIGO_08918 | BF045429 | ALOX5         | -0.066 | 0.720 | 0.425  | 0.384 | 0.035  | 0.936 | -0.292 | 0.448 |
| OLIGO_08919 | BF045494 | LAMA3         | -0.238 | 0.352 | 0.543  | 0.432 | 0.448  | 0.381 | -0.025 | 0.953 |
| OLIGO_08925 | BF045193 | NDUFS4        | 0.155  | 0.506 | -0.291 | 0.463 | -0.157 | 0.609 | -0.987 | 0.021 |
| OLIGO_08928 | BF043497 | LOC506943     | 0.603  | 0.222 | 0.556  | 0.457 | 0.398  | 0.663 | 0.409  | 0.278 |
| OLIGO_08930 | BF044158 | TCF15         | -1.316 | 0.128 | 0.260  | 0.465 | 0.036  | 0.858 | 0.061  | 0.799 |
| OLIGO_08931 | BF043547 | TIMP1         | 0.300  | 0.276 | 0.228  | 0.478 | 0.343  | 0.073 | 1.043  | 0.001 |
| OLIGO_08932 | BF041582 | TMED3         | -0.067 | 0.619 | 0.309  | 0.257 | 0.187  | 0.312 | -0.026 | 0.855 |
| OLIGO_08933 | BF041420 | RAVER1        | -0.056 | 0.670 | 0.033  | 0.895 | -0.299 | 0.179 | -0.750 | 0.004 |
| OLIGO_08934 | BF044136 | LMBRD1        | 0.207  | 0.246 | 0.026  | 0.926 | 0.359  | 0.304 | -0.332 | 0.192 |
| OLIGO_08936 | BF041297 | RGR           | 0.073  | 0.670 | 0.079  | 0.782 | -0.096 | 0.520 | -0.330 | 0.034 |
| OLIGO_08938 | BF041604 | C2orf7        | -0.087 | 0.721 | -0.191 | 0.503 | 0.103  | 0.643 | -0.447 | 0.001 |
| OLIGO_08939 | BF039553 | APOA1BP       | 0.275  | 0.059 | 0.157  | 0.533 | 0.060  | 0.750 | -0.166 | 0.331 |
| OLIGO_08940 | BF039523 | MGC137245     | 0.045  | 0.743 | 0.344  | 0.238 | 0.068  | 0.797 | -0.167 | 0.500 |
| OLIGO_08941 | AW464555 | SCPEP1        | 0.205  | 0.524 | -0.121 | 0.758 | 0.447  | 0.409 | 0.249  | 0.390 |
| OLIGO_08945 | BF039503 | CCRK          | -0.353 | 0.164 | 0.101  | 0.564 | -0.271 | 0.083 | -0.298 | 0.064 |
| OLIGO_08946 | AW462952 | NP            | 0.143  | 0.498 | -0.186 | 0.571 | -0.106 | 0.625 | 0.349  | 0.109 |
| OLIGO_08947 | BF042069 | TMEM103       | -0.048 | 0.798 | 0.108  | 0.446 | -0.023 | 0.911 | -0.339 | 0.036 |
| OLIGO_08948 | AW464726 | GCGR          | 0.011  | 0.933 | -0.229 | 0.248 | -0.137 | 0.157 | -0.143 | 0.443 |
| OLIGO_08952 | AW462961 | SLMAP         | -0.202 | 0.277 | 0.005  | 0.986 | 0.730  | 0.139 | 0.200  | 0.109 |
| OLIGO_08953 | BF045125 | ZCCHC14       | -0.019 | 0.913 | -0.066 | 0.870 | -0.117 | 0.743 | -0.058 | 0.839 |
| OLIGO_08954 | BF045119 | TTMA          | -0.157 | 0.190 | 0.247  | 0.510 | 0.405  | 0.377 | -0.103 | 0.626 |
| OLIGO_08955 | BF044995 | SH3BGR        | -0.133 | 0.439 | -0.100 | 0.733 | -0.305 | 0.148 | 0.433  | 0.111 |
| OLIGO_08956 | BF045867 | C16orf68      | -0.269 | 0.131 | -0.082 | 0.903 | 0.895  | 0.183 | -0.398 | 0.442 |

|             |          |           |        |       |        |       |        |       |        |       |
|-------------|----------|-----------|--------|-------|--------|-------|--------|-------|--------|-------|
| OLIGO_08957 | AW464816 | C12orf49  | 0.132  | 0.219 | -0.028 | 0.919 | -0.164 | 0.337 | -0.298 | 0.222 |
| OLIGO_08964 | AW463127 | NADSYN1   | -0.072 | 0.724 | 0.134  | 0.584 | -0.183 | 0.558 | -0.167 | 0.337 |
| OLIGO_08965 | AW464106 | E4F1      | -0.212 | 0.287 | 0.187  | 0.590 | -0.285 | 0.193 | 0.120  | 0.398 |
| OLIGO_08967 | AW462485 | ORF1-FL49 | 0.036  | 0.898 | 0.259  | 0.599 | 0.184  | 0.357 | -0.309 | 0.094 |
| OLIGO_08968 | BF043784 | SENP6     | -0.059 | 0.755 | -0.250 | 0.357 | -0.102 | 0.521 | -0.193 | 0.367 |
| OLIGO_08969 | BF041545 | ESM1      | -0.494 | 0.061 | -0.117 | 0.749 | 1.061  | 0.177 | 0.204  | 0.466 |
| OLIGO_08970 | BF045323 | POP5      | 0.245  | 0.210 | 0.057  | 0.819 | 0.021  | 0.905 | -0.077 | 0.659 |
| OLIGO_08972 | BF045749 | ZNHIT4    | 0.033  | 0.873 | -0.244 | 0.573 | 0.062  | 0.694 | -0.122 | 0.522 |
| OLIGO_08974 | BF042542 | SCP2      | -0.083 | 0.753 | -0.056 | 0.834 | 0.188  | 0.494 | -0.033 | 0.866 |
| OLIGO_08975 | BF042983 | BTF3L4    | 0.015  | 0.905 | -0.190 | 0.507 | 0.050  | 0.824 | -0.800 | 0.009 |
| OLIGO_08976 | BF043162 | LOC515511 | -0.036 | 0.814 | -0.074 | 0.866 | -0.270 | 0.481 | 0.042  | 0.832 |
| OLIGO_08977 | BF042119 | TRAPPC6A  | -0.088 | 0.494 | -0.282 | 0.491 | 0.254  | 0.415 | -0.162 | 0.604 |
| OLIGO_08979 | AW463108 | PAGE4     | -0.557 | 0.006 | 0.144  | 0.710 | 0.345  | 0.408 | 0.258  | 0.120 |
| OLIGO_08981 | BF041275 | LOC63929  | -0.479 | 0.110 | -0.129 | 0.442 | 0.199  | 0.254 | -0.443 | 0.003 |
| OLIGO_08986 | BF040829 | PSMB7     | 0.146  | 0.504 | 0.038  | 0.935 | 0.518  | 0.106 | -0.202 | 0.409 |
| OLIGO_08987 | AW464734 | BZW2      | 0.223  | 0.327 | -0.499 | 0.133 | 0.218  | 0.421 | 0.086  | 0.714 |
| OLIGO_08990 | AW462314 | BTF3      | 0.001  | 0.997 | -0.644 | 0.047 | -0.038 | 0.872 | -0.152 | 0.543 |
| OLIGO_08992 | BF043512 | CREB5     | -0.519 | 0.146 | -0.080 | 0.704 | -0.237 | 0.172 | -0.294 | 0.152 |
| OLIGO_08995 | BF045074 | MED8      | 0.256  | 0.240 | -0.198 | 0.430 | -0.089 | 0.729 | -0.464 | 0.028 |
| OLIGO_08997 | BF040504 | ZMYND11   | -0.047 | 0.843 | -0.025 | 0.918 | -0.242 | 0.315 | -0.373 | 0.034 |
| OLIGO_08998 | AW463156 | ZFP36L2   | 0.025  | 0.961 | -0.043 | 0.814 | 0.146  | 0.515 | -0.414 | 0.078 |
| OLIGO_08999 | BF039199 | FOXK2     | 0.020  | 0.922 | -0.292 | 0.245 | -0.026 | 0.874 | -0.627 | 0.009 |
| OLIGO_09000 | BF044941 | C2orf30   | 0.255  | 0.483 | -0.322 | 0.518 | 0.851  | 0.164 | -0.240 | 0.537 |
| OLIGO_09001 | BF039384 | ENG       | -0.261 | 0.426 | -0.190 | 0.588 | -0.227 | 0.219 | 0.066  | 0.792 |
| OLIGO_09002 | AW465247 | CYB5B     | 0.169  | 0.470 | -0.097 | 0.603 | 0.080  | 0.617 | -0.125 | 0.385 |
| OLIGO_09007 | BF045464 | MAST3     | 0.145  | 0.578 | 0.870  | 0.042 | -0.597 | 0.209 | 0.157  | 0.441 |
| OLIGO_09008 | BF044943 | ZNF407    | -0.146 | 0.713 | -0.170 | 0.535 | -0.042 | 0.832 | -0.582 | 0.106 |
| OLIGO_09010 | BF044910 | SIN3B     | -0.253 | 0.252 | -0.048 | 0.897 | 0.383  | 0.217 | -0.519 | 0.141 |
| OLIGO_09013 | AW464021 | RYK       | 0.125  | 0.496 | 0.630  | 0.177 | 0.410  | 0.066 | 0.171  | 0.369 |
| OLIGO_09014 | BF044936 | RTN4IP1   | -0.092 | 0.528 | 0.439  | 0.073 | 0.319  | 0.200 | 0.097  | 0.612 |
| OLIGO_09015 | BF044894 | HEATR3    | -0.020 | 0.900 | 0.516  | 0.203 | 0.096  | 0.650 | -0.265 | 0.258 |
| OLIGO_09016 | BF046637 | AMD1      | 0.112  | 0.535 | 0.451  | 0.216 | -0.096 | 0.624 | -0.075 | 0.731 |
| OLIGO_09017 | BF040085 | KSR1      | 0.086  | 0.741 | 0.191  | 0.410 | 0.047  | 0.871 | -0.289 | 0.145 |
| OLIGO_09018 | BF042997 | FAM82A    | 0.073  | 0.634 | 0.563  | 0.090 | 0.150  | 0.373 | 0.071  | 0.651 |
| OLIGO_09019 | BF040914 | PTK2B     | 0.021  | 0.911 | 0.148  | 0.707 | 0.118  | 0.633 | -0.016 | 0.926 |
| OLIGO_09020 | BF043000 | NSUN5     | 0.188  | 0.280 | 0.054  | 0.903 | -0.315 | 0.222 | -0.051 | 0.714 |
| OLIGO_09021 | BF042994 | C9orf102  | -0.052 | 0.832 | -0.386 | 0.229 | -0.467 | 0.062 | -0.520 | 0.145 |
| OLIGO_09022 | AW463092 | MTA3      | 0.345  | 0.302 | -0.452 | 0.075 | 0.525  | 0.280 | -0.320 | 0.175 |
| OLIGO_09023 | BF043421 | KLF15     | -0.142 | 0.625 | -0.141 | 0.640 | -0.026 | 0.898 | -0.576 | 0.026 |
| OLIGO_09024 | BF042966 | SFXN1     | 0.216  | 0.224 | 0.894  | 0.009 | 0.447  | 0.051 | 0.251  | 0.263 |
| OLIGO_09025 | AW466169 | PMM1      | -0.032 | 0.817 | 0.458  | 0.168 | -0.172 | 0.428 | -0.263 | 0.228 |
| OLIGO_09028 | BF039645 | ZDHHC23   | 0.219  | 0.292 | 0.243  | 0.331 | 0.255  | 0.195 | 0.138  | 0.420 |
| OLIGO_09030 | BF043272 | GOSR2     | 0.377  | 0.084 | -0.232 | 0.186 | -0.183 | 0.366 | -0.641 | 0.000 |
| OLIGO_09032 | BF040917 | TGM1      | -0.138 | 0.661 | -0.193 | 0.724 | 0.360  | 0.427 | 0.083  | 0.777 |
| OLIGO_09033 | BF046199 | C15orf39  | -0.374 | 0.170 | -0.302 | 0.246 | -0.135 | 0.569 | -0.418 | 0.161 |
| OLIGO_09034 | BF041100 | LOC641705 | -0.188 | 0.415 | -0.227 | 0.588 | -0.382 | 0.169 | -0.672 | 0.004 |
| OLIGO_09036 | BF043830 | GABARAPL1 | 0.129  | 0.399 | 0.122  | 0.729 | -0.250 | 0.565 | 0.556  | 0.019 |
| OLIGO_09037 | BF045076 | LOC507418 | -0.004 | 0.979 | -0.134 | 0.553 | -0.214 | 0.339 | -0.266 | 0.341 |
| OLIGO_09039 | BF041015 | HUS1      | 0.200  | 0.180 | 0.158  | 0.451 | 0.013  | 0.909 | -0.446 | 0.013 |
| OLIGO_09040 | BF044386 | CCDC52    | -0.487 | 0.099 | 0.289  | 0.128 | 0.102  | 0.247 | -0.198 | 0.198 |
| OLIGO_09041 | BF046658 | TIMM50    | 0.111  | 0.538 | -0.202 | 0.291 | 0.093  | 0.332 | -0.332 | 0.046 |
| OLIGO_09043 | AW462974 | ENAH      | -0.180 | 0.522 | -0.263 | 0.518 | 1.176  | 0.131 | -0.458 | 0.076 |
| OLIGO_09050 | BF046710 | RRAGD     | -0.280 | 0.498 | 0.061  | 0.806 | 0.203  | 0.360 | -0.109 | 0.680 |
| OLIGO_09051 | BF041320 | ATXN3     | 0.271  | 0.176 | -0.119 | 0.690 | -0.201 | 0.184 | -0.245 | 0.339 |
| OLIGO_09052 | BF045562 | AGPAT7    | 0.206  | 0.442 | 0.422  | 0.271 | 0.131  | 0.574 | -0.170 | 0.252 |
| OLIGO_09054 | BF044688 | Mcf2l     | -0.146 | 0.447 | 0.340  | 0.408 | -0.348 | 0.095 | -0.380 | 0.052 |
| OLIGO_09055 | AW463139 | WDR17     | -0.002 | 0.995 | -0.056 | 0.886 | 0.153  | 0.598 | -0.501 | 0.062 |
| OLIGO_09057 | BF044698 | CSRP2BP   | -0.414 | 0.187 | 0.014  | 0.943 | -0.211 | 0.186 | -0.308 | 0.043 |
| OLIGO_09060 | BF044836 | Sharnin   | -0.261 | 0.174 | 0.067  | 0.721 | -0.400 | 0.106 | -0.213 | 0.322 |
| OLIGO_09062 | BF042851 | NFIC      | -0.033 | 0.886 | 0.199  | 0.661 | 0.225  | 0.507 | -0.046 | 0.846 |

|             |          |           |        |       |        |       |        |       |        |       |
|-------------|----------|-----------|--------|-------|--------|-------|--------|-------|--------|-------|
| OLIGO_09063 | BF042853 | YAF2      | -0.526 | 0.074 | -0.267 | 0.461 | -0.032 | 0.941 | 0.029  | 0.893 |
| OLIGO_09065 | BF042678 | SPINT2    | -0.038 | 0.877 | -0.531 | 0.366 | 2.136  | 0.115 | 1.149  | 0.101 |
| OLIGO_09073 | BF040591 | UFC1      | 0.099  | 0.680 | 0.148  | 0.777 | 0.476  | 0.135 | -0.273 | 0.194 |
| OLIGO_09074 | BF040558 | DENND1A   | -0.203 | 0.298 | -0.186 | 0.524 | -0.095 | 0.665 | -0.174 | 0.302 |
| OLIGO_09076 | BF040616 | SALL4     | -0.597 | 0.304 | -0.718 | 0.206 | 0.146  | 0.661 | -0.076 | 0.719 |
| OLIGO_09077 | BF040615 | PPP1R13B  | -0.064 | 0.862 | -0.257 | 0.723 | 1.516  | 0.047 | -0.473 | 0.204 |
| OLIGO_09079 | BF040613 | LOC513251 | 0.165  | 0.435 | 0.200  | 0.658 | -0.259 | 0.084 | 0.150  | 0.385 |
| OLIGO_09080 | BF040572 | CRELD1    | 0.056  | 0.695 | 0.414  | 0.059 | 0.071  | 0.640 | -0.225 | 0.026 |
| OLIGO_09081 | BF042074 | LIPE      | -0.160 | 0.492 | 0.292  | 0.480 | 0.318  | 0.235 | -0.498 | 0.293 |
| OLIGO_09082 | BF043136 | EPPB9     | 0.277  | 0.111 | -0.636 | 0.168 | -0.601 | 0.079 | -0.579 | 0.081 |
| OLIGO_09083 | BF039997 | PCSK7     | -0.297 | 0.490 | -0.141 | 0.405 | 0.499  | 0.244 | -0.038 | 0.856 |
| OLIGO_09084 | BF040761 | NR2C2     | 0.216  | 0.227 | -0.212 | 0.304 | -0.363 | 0.266 | 0.051  | 0.775 |
| OLIGO_09086 | BF040752 | POLA2     | 0.009  | 0.938 | 0.159  | 0.664 | 0.290  | 0.251 | -0.363 | 0.375 |
| OLIGO_09087 | BF040753 | MGC127771 | 0.118  | 0.368 | -0.271 | 0.341 | -0.198 | 0.354 | -0.167 | 0.389 |
| OLIGO_09088 | AW464696 | PALLD     | 0.081  | 0.680 | 0.073  | 0.786 | 0.398  | 0.126 | -0.249 | 0.283 |
| OLIGO_09092 | AW463727 | RPL7L1    | 0.101  | 0.753 | -0.107 | 0.698 | 0.263  | 0.354 | -0.305 | 0.097 |
| OLIGO_09096 | AW461632 | EMX2      | -0.148 | 0.621 | -0.012 | 0.975 | -0.412 | 0.110 | 0.001  | 0.992 |
| OLIGO_09097 | AW462955 | MOSPD1    | 0.476  | 0.174 | -0.089 | 0.736 | -0.025 | 0.940 | -0.028 | 0.886 |
| OLIGO_09098 | BF046450 | CCDC85B   | -0.087 | 0.626 | -0.071 | 0.808 | -0.202 | 0.182 | 0.235  | 0.210 |
| OLIGO_09100 | BF044383 | MOV10     | 0.070  | 0.730 | -0.009 | 0.975 | -0.492 | 0.172 | -0.479 | 0.013 |
| OLIGO_09102 | BF046474 | SOCS6     | -0.610 | 0.282 | 0.551  | 0.155 | 0.158  | 0.597 | 0.032  | 0.910 |
| OLIGO_09103 | BF046427 | EPHX2     | -0.072 | 0.525 | -0.012 | 0.974 | 0.019  | 0.956 | -0.397 | 0.117 |
| OLIGO_09104 | BF046597 | HDAC10    | -0.076 | 0.661 | 0.115  | 0.751 | 0.418  | 0.167 | 0.035  | 0.838 |
| OLIGO_09105 | BF040142 | ITGB4     | 0.272  | 0.577 | -0.327 | 0.493 | -0.369 | 0.089 | -0.273 | 0.404 |
| OLIGO_09106 | BF044555 | SAP30L    | 0.031  | 0.888 | 0.804  | 0.184 | -0.084 | 0.840 | -0.239 | 0.497 |
| OLIGO_09108 | BF045939 | PXK       | -0.045 | 0.772 | 0.668  | 0.123 | -0.107 | 0.589 | 0.418  | 0.025 |
| OLIGO_09112 | BF044546 | KLHDC2    | 0.109  | 0.560 | -0.101 | 0.782 | 0.542  | 0.100 | -0.124 | 0.604 |
| OLIGO_09114 | AW463002 | P117      | 0.023  | 0.864 | 0.073  | 0.607 | 0.464  | 0.275 | -0.189 | 0.240 |
| OLIGO_09115 | BF044141 | LOC538963 | -0.297 | 0.179 | -0.257 | 0.338 | 0.132  | 0.674 | 0.104  | 0.592 |
| OLIGO_09116 | BF039921 | COX7A2    | 0.166  | 0.573 | -0.178 | 0.500 | -0.437 | 0.144 | -0.370 | 0.092 |
| OLIGO_09119 | AW463031 | STK10     | -0.130 | 0.404 | 1.132  | 0.023 | -0.181 | 0.353 | 0.244  | 0.151 |
| OLIGO_09120 | BF040705 | PSCD1     | -0.284 | 0.267 | 0.770  | 0.028 | -0.257 | 0.208 | 0.407  | 0.007 |
| OLIGO_09121 | BF042474 | RANBP3    | -0.202 | 0.272 | 0.573  | 0.220 | 0.713  | 0.103 | -0.114 | 0.561 |
| OLIGO_09123 | AW463696 | GPR107    | 0.171  | 0.308 | 0.096  | 0.709 | -0.043 | 0.867 | -0.168 | 0.399 |
| OLIGO_09125 | BF040403 | LOC506282 | -0.169 | 0.603 | -0.073 | 0.865 | 0.287  | 0.470 | -0.260 | 0.418 |
| OLIGO_09127 | AW463165 | RBP4      | 0.109  | 0.693 | -0.405 | 0.616 | 0.676  | 0.394 | -0.004 | 0.986 |
| OLIGO_09129 | BF045893 | PLAC8     | -0.124 | 0.745 | 0.049  | 0.917 | -0.765 | 0.120 | 0.199  | 0.422 |
| OLIGO_09130 | BF046278 | LAMC2     | -0.216 | 0.441 | 0.424  | 0.152 | -0.322 | 0.237 | 0.275  | 0.158 |
| OLIGO_09131 | AW463075 | C1orf61   | 0.086  | 0.716 | 0.499  | 0.508 | 0.225  | 0.271 | 0.229  | 0.299 |
| OLIGO_09133 | BF046223 | AHDC1     | -0.187 | 0.485 | 0.338  | 0.298 | 0.249  | 0.154 | 0.441  | 0.045 |
| OLIGO_09136 | BF045936 | CUTL1     | -0.075 | 0.645 | 0.028  | 0.890 | 0.107  | 0.465 | 0.080  | 0.517 |
| OLIGO_09138 | BF044720 | EPS8L2    | 0.249  | 0.485 | 0.017  | 0.957 | -0.005 | 0.988 | -0.206 | 0.552 |
| OLIGO_09144 | BF044334 | FYCO1     | -0.091 | 0.461 | 0.245  | 0.461 | -0.186 | 0.592 | 0.165  | 0.404 |
| OLIGO_09145 | AW463110 | FLJ22624  | -0.023 | 0.863 | 0.032  | 0.917 | 0.253  | 0.109 | -0.278 | 0.262 |
| OLIGO_09147 | BF039783 | SHMT2     | -0.173 | 0.523 | 0.091  | 0.750 | 0.219  | 0.287 | -0.292 | 0.206 |
| OLIGO_09148 | BF042096 | FAM44B    | 0.074  | 0.579 | 0.114  | 0.454 | 0.186  | 0.310 | 0.099  | 0.617 |
| OLIGO_09150 | BF042200 | LOC541219 | 0.192  | 0.321 | -0.047 | 0.875 | 0.354  | 0.295 | -0.126 | 0.629 |
| OLIGO_09151 | AW462965 | INSL3     | -0.052 | 0.725 | -0.002 | 0.994 | -0.032 | 0.873 | -0.251 | 0.180 |
| OLIGO_09153 | AW464455 | MUC1      | -0.101 | 0.459 | -0.194 | 0.551 | 0.362  | 0.516 | -0.236 | 0.181 |
| OLIGO_09154 | AW462983 | ZNF34     | 0.124  | 0.491 | 0.050  | 0.853 | -0.088 | 0.770 | 0.047  | 0.834 |
| OLIGO_09155 | BF040070 | SYVN1     | -0.172 | 0.222 | 0.175  | 0.519 | -0.296 | 0.147 | 0.173  | 0.118 |
| OLIGO_09157 | BF040122 | PNPLA2    | -0.261 | 0.273 | -0.341 | 0.049 | 0.402  | 0.179 | 0.134  | 0.459 |
| OLIGO_09158 | BF040123 | BCAS2     | 0.050  | 0.882 | -0.353 | 0.122 | 0.127  | 0.653 | -0.490 | 0.111 |
| OLIGO_09159 | BF040081 | C11orf59  | 0.160  | 0.589 | 0.090  | 0.813 | 0.389  | 0.231 | 0.155  | 0.339 |
| OLIGO_09160 | BF045217 | CYB5R4    | -0.042 | 0.816 | -0.287 | 0.227 | -0.229 | 0.429 | -0.463 | 0.108 |
| OLIGO_09164 | BF045750 | TMEM24    | -0.043 | 0.775 | 0.149  | 0.816 | 0.241  | 0.678 | 0.019  | 0.953 |
| OLIGO_09165 | BF045752 | SGPL1     | 0.016  | 0.950 | -0.078 | 0.796 | -0.107 | 0.826 | 0.140  | 0.467 |
| OLIGO_09166 | BF045775 | DENND2A   | -0.465 | 0.132 | -0.226 | 0.435 | 0.122  | 0.771 | -1.116 | 0.002 |
| OLIGO_09169 | AW463032 | SITPEC    | -0.387 | 0.019 | -0.192 | 0.504 | -0.138 | 0.585 | -0.137 | 0.387 |
| OLIGO_09170 | BF045257 | SUMF2     | -0.354 | 0.241 | -0.426 | 0.159 | 0.201  | 0.364 | -0.299 | 0.195 |

|             |          |           |        |       |        |       |        |       |        |       |
|-------------|----------|-----------|--------|-------|--------|-------|--------|-------|--------|-------|
| OLIGO_09171 | AW463774 | ACADVL    | -0.280 | 0.247 | 0.060  | 0.734 | -0.006 | 0.958 | -0.227 | 0.099 |
| OLIGO_09173 | BF045781 | C9orf42   | 0.035  | 0.768 | 0.084  | 0.634 | -0.231 | 0.159 | 0.068  | 0.536 |
| OLIGO_09174 | AW464038 | PRKAG2    | 0.125  | 0.651 | -0.196 | 0.535 | -0.215 | 0.427 | -0.124 | 0.552 |
| OLIGO_09176 | BF045916 | GABPB2    | -0.059 | 0.887 | -0.114 | 0.806 | 0.081  | 0.765 | -0.302 | 0.198 |
| OLIGO_09177 | AW463162 | TAF7      | -0.175 | 0.518 | 0.228  | 0.416 | 0.059  | 0.775 | -0.131 | 0.548 |
| OLIGO_09178 | BF045903 | NPR1      | -0.262 | 0.582 | -0.323 | 0.371 | -0.320 | 0.136 | -0.110 | 0.673 |
| OLIGO_09179 | BF045934 | PLAGL2    | 0.250  | 0.276 | -0.502 | 0.044 | -0.021 | 0.933 | -0.248 | 0.142 |
| OLIGO_09180 | BF046094 | MITF      | 0.389  | 0.425 | -0.175 | 0.696 | -0.051 | 0.838 | 0.023  | 0.947 |
| OLIGO_09182 | BF046071 | HBXIP     | -0.017 | 0.883 | -0.058 | 0.703 | -0.421 | 0.099 | 0.138  | 0.458 |
| OLIGO_09183 | BF039667 | GCM1      | -0.311 | 0.483 | -0.624 | 0.165 | 0.347  | 0.606 | -0.504 | 0.029 |
| OLIGO_09186 | BF046387 | CYB5D2    | -0.119 | 0.619 | 0.260  | 0.336 | -0.076 | 0.613 | -0.076 | 0.691 |
| OLIGO_09189 | BF043815 | JAG2      | 0.014  | 0.952 | 0.236  | 0.464 | 0.035  | 0.862 | -0.247 | 0.169 |
| OLIGO_09191 | BF041467 | UNC50     | 0.082  | 0.536 | -0.138 | 0.514 | -0.135 | 0.457 | 0.144  | 0.363 |
| OLIGO_09194 | AW464366 | VGLL1     | 0.219  | 0.543 | -0.274 | 0.151 | 0.095  | 0.496 | 0.249  | 0.058 |
| OLIGO_09195 | BF041972 | MRPS17    | -0.012 | 0.948 | 0.080  | 0.751 | -0.579 | 0.086 | -0.577 | 0.019 |
| OLIGO_09196 | BF045165 | C12orf29  | -0.017 | 0.932 | -0.034 | 0.854 | -0.416 | 0.046 | -0.757 | 0.000 |
| OLIGO_09199 | BF043945 | LMBR1     | 0.087  | 0.508 | -0.269 | 0.393 | -0.137 | 0.654 | -0.316 | 0.088 |
| OLIGO_09200 | BF039753 | NBL1      | -0.196 | 0.465 | -0.117 | 0.677 | -0.284 | 0.120 | -0.070 | 0.735 |
| OLIGO_09201 | BF043429 | TBCD      | -0.165 | 0.389 | -0.215 | 0.355 | -0.138 | 0.665 | -0.692 | 0.000 |
| OLIGO_09203 | BF041163 | LOX       | -0.217 | 0.310 | 0.576  | 0.121 | 0.137  | 0.700 | -0.046 | 0.885 |
| OLIGO_09205 | AW462529 | INADL     | -0.208 | 0.350 | 0.269  | 0.404 | 0.203  | 0.570 | 0.096  | 0.689 |
| OLIGO_09207 | BF045398 | FAAH      | -0.215 | 0.199 | 0.310  | 0.126 | 0.163  | 0.197 | 0.171  | 0.290 |
| OLIGO_09208 | AW461507 | TOR2A     | -0.034 | 0.905 | 0.008  | 0.956 | 0.037  | 0.808 | 0.222  | 0.323 |
| OLIGO_09212 | BF039847 | HBP1      | 0.217  | 0.256 | -0.094 | 0.765 | -0.143 | 0.680 | 0.081  | 0.732 |
| OLIGO_09214 | BF039948 | IK        | -0.043 | 0.869 | -0.158 | 0.672 | 0.097  | 0.670 | -0.790 | 0.012 |
| OLIGO_09218 | BF039404 | RSAD2     | -0.231 | 0.450 | 0.757  | 0.111 | -0.392 | 0.233 | 0.531  | 0.262 |
| OLIGO_09219 | BF043252 | SEC14L1   | 0.383  | 0.109 | 0.236  | 0.570 | 0.373  | 0.249 | -0.073 | 0.663 |
| OLIGO_09223 | BF040091 | RBM16     | -0.039 | 0.815 | -0.236 | 0.457 | -0.298 | 0.133 | -0.236 | 0.215 |
| OLIGO_09226 | BF045598 | KIAA0376  | -0.283 | 0.664 | -0.010 | 0.977 | -0.378 | 0.193 | 0.093  | 0.733 |
| OLIGO_09227 | AW466209 | LOXL3     | -0.178 | 0.436 | -0.330 | 0.198 | 0.152  | 0.571 | 0.535  | 0.013 |
| OLIGO_09228 | BF045573 | LOC134145 | 0.004  | 0.985 | -0.382 | 0.112 | 0.166  | 0.522 | 0.199  | 0.396 |
| OLIGO_09230 | BF044297 | ZCSL2     | 0.024  | 0.902 | -0.065 | 0.830 | -0.178 | 0.495 | 0.155  | 0.482 |
| OLIGO_09231 | BF045839 | PXK       | -0.113 | 0.626 | 0.157  | 0.600 | 0.138  | 0.626 | 0.106  | 0.536 |
| OLIGO_09232 | BF041631 | ZNHIT1    | -0.225 | 0.099 | -0.282 | 0.354 | -0.155 | 0.420 | -0.524 | 0.005 |
| OLIGO_09234 | BF043663 | C18orf25  | -0.008 | 0.964 | -0.033 | 0.890 | 0.141  | 0.482 | -0.371 | 0.051 |
| OLIGO_09235 | AW463229 | C17orf81  | -0.251 | 0.099 | 0.030  | 0.900 | -0.029 | 0.872 | 0.057  | 0.681 |
| OLIGO_09236 | BF042501 | CEACAM1   | -0.162 | 0.134 | -0.068 | 0.785 | 0.488  | 0.457 | 0.028  | 0.875 |
| OLIGO_09237 | BF043671 | PPIH      | 0.012  | 0.946 | -0.528 | 0.069 | 0.096  | 0.661 | -0.666 | 0.004 |
| OLIGO_09238 | BF041368 | PUM1      | -0.011 | 0.961 | -0.139 | 0.538 | 0.180  | 0.464 | -0.422 | 0.101 |
| OLIGO_09240 | AW463777 | Zfp3612   | -0.162 | 0.270 | 0.198  | 0.425 | -0.178 | 0.555 | 0.369  | 0.033 |
| OLIGO_09241 | AW465083 | SERPINA5  | -0.196 | 0.552 | 0.218  | 0.820 | 1.155  | 0.279 | -1.239 | 0.003 |
| OLIGO_09242 | BF044391 | SRGAP2    | -0.067 | 0.631 | -0.188 | 0.593 | 0.229  | 0.629 | -0.723 | 0.148 |
| OLIGO_09243 | AW463361 | PTGES     | -0.015 | 0.925 | 0.061  | 0.813 | 0.249  | 0.284 | 0.335  | 0.131 |
| OLIGO_09244 | AW464913 | COMMD5    | -0.075 | 0.761 | -0.218 | 0.539 | -0.536 | 0.098 | -0.479 | 0.050 |
| OLIGO_09245 | BF041622 | ALKBH4    | -0.110 | 0.594 | 0.005  | 0.978 | -0.285 | 0.083 | -0.222 | 0.053 |
| OLIGO_09249 | BF044406 | SFRS11    | -0.009 | 0.959 | -0.107 | 0.677 | -0.583 | 0.104 | -0.303 | 0.174 |
| OLIGO_09251 | BF040463 | LNX2      | 0.024  | 0.895 | -0.321 | 0.157 | 0.096  | 0.606 | 0.004  | 0.981 |
| OLIGO_09252 | AW463337 | BPNT1     | 0.035  | 0.811 | -0.247 | 0.230 | 0.113  | 0.576 | 0.031  | 0.851 |
| OLIGO_09254 | BF042864 | UBTD1     | -0.037 | 0.808 | 0.000  | 1.000 | -0.060 | 0.751 | -0.204 | 0.476 |
| OLIGO_09255 | BF042220 | SNRPA     | -0.222 | 0.526 | -0.322 | 0.308 | -0.408 | 0.196 | -0.426 | 0.040 |
| OLIGO_09257 | BF045406 | LOC531802 | -0.057 | 0.705 | 0.059  | 0.817 | -0.174 | 0.460 | 0.198  | 0.240 |
| OLIGO_09258 | BF045444 | CYB5      | -0.166 | 0.258 | -0.278 | 0.406 | -0.262 | 0.342 | -0.146 | 0.358 |
| OLIGO_09261 | BF045410 | HYAL1     | -0.048 | 0.796 | 0.313  | 0.193 | -0.217 | 0.247 | -0.417 | 0.006 |
| OLIGO_09262 | BF045413 | LOH12CR1  | -1.123 | 0.081 | -0.263 | 0.450 | 0.271  | 0.389 | -0.674 | 0.049 |
| OLIGO_09263 | BF045415 | FAM13A1   | 0.898  | 0.032 | -0.492 | 0.317 | -0.493 | 0.188 | 0.489  | 0.102 |
| OLIGO_09264 | BF045391 | PRR6      | -0.114 | 0.667 | 0.116  | 0.649 | 0.373  | 0.139 | -0.333 | 0.071 |
| OLIGO_09265 | BF043271 | ZNF75     | 0.092  | 0.728 | -0.012 | 0.958 | -0.030 | 0.901 | -0.269 | 0.232 |
| OLIGO_09267 | BF043308 | SCC-112   | -0.069 | 0.590 | -0.109 | 0.779 | -0.574 | 0.167 | -0.282 | 0.246 |
| OLIGO_09268 | BF043289 | PPM1K     | -0.023 | 0.930 | 0.151  | 0.405 | -0.486 | 0.135 | -0.022 | 0.885 |
| OLIGO_09269 | AW461513 | MGC137708 | -0.078 | 0.685 | -0.145 | 0.452 | 0.110  | 0.407 | -0.166 | 0.309 |



|             |          |           |        |       |        |       |        |       |        |       |
|-------------|----------|-----------|--------|-------|--------|-------|--------|-------|--------|-------|
| OLIGO_09271 | BF043358 | TLE4      | -0.309 | 0.482 | -0.116 | 0.709 | -0.238 | 0.429 | -0.543 | 0.192 |
| OLIGO_09272 | BF040973 | PPP1R11   | -0.017 | 0.905 | 0.110  | 0.759 | -0.213 | 0.484 | -0.108 | 0.532 |
| OLIGO_09275 | BF045054 | MAPKAPK3  | 0.118  | 0.546 | 0.091  | 0.766 | 0.125  | 0.483 | 0.240  | 0.089 |
| OLIGO_09277 | BF041129 | PIM1      | -0.050 | 0.750 | 0.014  | 0.964 | 0.053  | 0.815 | 0.179  | 0.249 |
| OLIGO_09278 | BF041126 | DNAJC12   | 0.117  | 0.594 | -0.138 | 0.776 | -1.166 | 0.148 | -0.760 | 0.026 |
| OLIGO_09279 | BF041292 | LHFPL2    | -0.220 | 0.484 | -0.199 | 0.560 | 0.354  | 0.276 | 0.284  | 0.103 |
| OLIGO_09280 | BF041287 | NLK       | 0.061  | 0.830 | 0.177  | 0.677 | 0.305  | 0.413 | -0.014 | 0.940 |
| OLIGO_09281 | BF041316 | MYST1     | -0.256 | 0.458 | 0.111  | 0.695 | -0.286 | 0.210 | -0.284 | 0.432 |
| OLIGO_09284 | BF041299 | GYLTL1B   | -0.626 | 0.012 | -0.143 | 0.734 | 0.524  | 0.088 | 0.023  | 0.905 |
| OLIGO_09287 | AW463243 | TMEM51    | -0.013 | 0.910 | -0.229 | 0.384 | -0.384 | 0.201 | 0.030  | 0.835 |
| OLIGO_09290 | BF039237 | PLP2      | -0.102 | 0.485 | 0.019  | 0.956 | 0.289  | 0.188 | -0.330 | 0.100 |
| OLIGO_09291 | AW463677 | RPL5      | -0.060 | 0.827 | -0.038 | 0.915 | -0.237 | 0.284 | -0.120 | 0.531 |
| OLIGO_09295 | BF044876 | G6PC3     | -0.012 | 0.957 | -0.093 | 0.813 | -0.467 | 0.070 | -0.291 | 0.048 |
| OLIGO_09297 | BF045882 | INPP4A    | -0.342 | 0.112 | 0.015  | 0.961 | -0.012 | 0.964 | -0.100 | 0.505 |
| OLIGO_09301 | BF042227 | APBA3     | -0.293 | 0.169 | 0.359  | 0.228 | 0.415  | 0.204 | 0.106  | 0.562 |
| OLIGO_09305 | AW464075 | SELS      | 0.140  | 0.539 | 0.579  | 0.158 | 0.333  | 0.086 | 0.149  | 0.313 |
| OLIGO_09307 | BF043118 | TXNDC5    | -0.154 | 0.520 | -0.110 | 0.637 | 0.015  | 0.945 | 0.001  | 0.995 |
| OLIGO_09308 | BF043130 | HSPBAP1   | -0.237 | 0.312 | -0.222 | 0.451 | -0.174 | 0.548 | -0.314 | 0.154 |
| OLIGO_09310 | BF043099 | GSTK1     | -0.543 | 0.051 | -0.474 | 0.535 | 1.352  | 0.054 | -0.354 | 0.321 |
| OLIGO_09312 | BF044630 | PABPC4    | 0.020  | 0.905 | 0.652  | 0.155 | 0.141  | 0.612 | -0.306 | 0.259 |
| OLIGO_09313 | BF041202 | LOC615893 | -0.372 | 0.053 | 0.473  | 0.083 | -0.267 | 0.271 | -0.204 | 0.292 |
| OLIGO_09315 | BF041173 | LOC538883 | 0.200  | 0.305 | -0.197 | 0.583 | 0.985  | 0.157 | 0.880  | 0.022 |
| OLIGO_09316 | AW463379 | SAFB      | 0.440  | 0.086 | -0.038 | 0.922 | 0.229  | 0.548 | -0.489 | 0.044 |
| OLIGO_09319 | BF041196 | KIAA0323  | 0.012  | 0.931 | 0.265  | 0.350 | 0.035  | 0.859 | 0.118  | 0.604 |
| OLIGO_09320 | BF045354 | M6PR      | -0.020 | 0.857 | 0.053  | 0.796 | -0.409 | 0.013 | -0.307 | 0.084 |
| OLIGO_09321 | BF041168 | MGC127809 | -0.086 | 0.792 | -0.301 | 0.260 | -0.312 | 0.078 | -0.790 | 0.002 |
| OLIGO_09325 | BF039028 | PRKCSH    | -0.014 | 0.912 | 0.125  | 0.473 | 0.100  | 0.523 | -0.231 | 0.261 |
| OLIGO_09327 | BF039111 | CDKN1A    | -0.234 | 0.384 | 0.122  | 0.650 | -0.090 | 0.542 | 0.636  | 0.002 |
| OLIGO_09328 | AW464103 | C14orf172 | 0.139  | 0.448 | -0.072 | 0.737 | -0.196 | 0.193 | -0.398 | 0.156 |
| OLIGO_09337 | BF044805 | SMURF1    | -0.007 | 0.963 | 0.293  | 0.341 | -0.143 | 0.360 | 0.217  | 0.354 |
| OLIGO_09338 | BF041516 | AMFR      | -0.040 | 0.755 | -0.009 | 0.975 | 0.195  | 0.316 | -0.110 | 0.573 |
| OLIGO_09340 | BF042894 | TGFB2     | -0.296 | 0.237 | -0.200 | 0.577 | 0.630  | 0.198 | -0.077 | 0.748 |
| OLIGO_09342 | AW465497 | KLHDC3    | 0.241  | 0.143 | 0.209  | 0.177 | -0.003 | 0.988 | -0.382 | 0.273 |
| OLIGO_09344 | BF042866 | C20orf23  | -0.325 | 0.153 | -0.077 | 0.808 | 0.260  | 0.321 | -0.046 | 0.764 |
| OLIGO_09345 | BF040968 | PLDN      | -0.087 | 0.611 | -0.180 | 0.494 | 0.428  | 0.082 | -0.444 | 0.009 |
| OLIGO_09346 | BF042899 | SERPINA3  | -0.380 | 0.149 | -0.422 | 0.440 | 0.138  | 0.676 | -0.596 | 0.106 |
| OLIGO_09348 | BF043033 | UNC13D    | -0.506 | 0.001 | 0.038  | 0.879 | -0.262 | 0.150 | -0.207 | 0.277 |
| OLIGO_09349 | AW464609 | TM2D2     | 0.066  | 0.593 | -0.227 | 0.256 | -0.061 | 0.745 | 0.070  | 0.661 |
| OLIGO_09353 | BF042389 | ARHGDI1B  | 0.013  | 0.957 | 0.162  | 0.776 | 0.396  | 0.157 | 0.204  | 0.251 |
| OLIGO_09354 | BF043180 | BLOC1S1   | 0.047  | 0.753 | -0.143 | 0.524 | -0.552 | 0.065 | -0.557 | 0.004 |
| OLIGO_09355 | BF046691 | LOC617216 | -0.339 | 0.125 | 0.069  | 0.768 | -0.376 | 0.168 | -0.523 | 0.013 |
| OLIGO_09359 | BF044634 | MRPL55    | 0.030  | 0.927 | -0.272 | 0.142 | 0.123  | 0.449 | -0.070 | 0.513 |
| OLIGO_09360 | BF044667 | PPF1A1    | -0.193 | 0.384 | -0.015 | 0.959 | 0.201  | 0.452 | 0.227  | 0.309 |
| OLIGO_09365 | BF042732 | TGFBR1    | -0.106 | 0.810 | -0.089 | 0.749 | 0.464  | 0.205 | -0.107 | 0.577 |
| OLIGO_09368 | BF043680 | C3orf10   | 0.073  | 0.736 | -0.010 | 0.970 | -0.223 | 0.469 | -0.211 | 0.255 |
| OLIGO_09369 | BF042740 | RAB22A    | -0.129 | 0.475 | 0.185  | 0.651 | 0.085  | 0.598 | -0.288 | 0.231 |
| OLIGO_09378 | BF040454 | NBLA00301 | -0.069 | 0.785 | -0.017 | 0.964 | -0.491 | 0.157 | -0.013 | 0.929 |
| OLIGO_09381 | BF040483 | LOC510177 | 0.036  | 0.871 | 0.134  | 0.683 | -0.081 | 0.641 | -0.025 | 0.893 |
| OLIGO_09382 | BF039162 | PSMB6     | -0.004 | 0.982 | 0.176  | 0.614 | 0.407  | 0.056 | -0.471 | 0.011 |
| OLIGO_09387 | BF039977 | TRAM1     | 0.081  | 0.682 | -0.052 | 0.808 | -0.104 | 0.530 | -0.138 | 0.478 |
| OLIGO_09388 | BF046350 | FAM80A    | -0.088 | 0.730 | -0.358 | 0.249 | -0.165 | 0.413 | 0.129  | 0.596 |
| OLIGO_09392 | BF041308 | LOC512949 | 0.052  | 0.837 | 0.262  | 0.700 | 0.659  | 0.192 | 0.071  | 0.816 |
| OLIGO_09393 | BF044397 | LOC653754 | -0.274 | 0.476 | -0.081 | 0.871 | -0.625 | 0.219 | -0.914 | 0.001 |
| OLIGO_09396 | BF042207 | MAP2K1    | -0.029 | 0.886 | 0.352  | 0.280 | 0.059  | 0.870 | 0.236  | 0.259 |
| OLIGO_09397 | BF042370 | AGPAT3    | -0.118 | 0.577 | 0.367  | 0.199 | -0.040 | 0.825 | 0.325  | 0.063 |
| OLIGO_09398 | BF039964 | FLJ10404  | -0.109 | 0.409 | 0.616  | 0.103 | 0.237  | 0.225 | 0.481  | 0.014 |
| OLIGO_09399 | BF042121 | TMEM142A  | -0.004 | 0.977 | 0.595  | 0.164 | -0.816 | 0.121 | -0.480 | 0.176 |
| OLIGO_09401 | BF042549 | DOT1L     | -0.195 | 0.329 | 0.400  | 0.457 | 0.619  | 0.137 | -0.086 | 0.752 |
| OLIGO_09403 | BF042558 | NUBP2     | 0.044  | 0.878 | 0.037  | 0.919 | 0.313  | 0.280 | -0.265 | 0.097 |
| OLIGO_09407 | BF040328 | HAVCR1    | -0.341 | 0.276 | 0.305  | 0.653 | 0.215  | 0.744 | 0.168  | 0.622 |

|             |          |           |        |       |        |       |        |       |        |       |
|-------------|----------|-----------|--------|-------|--------|-------|--------|-------|--------|-------|
| OLIGO_09409 | BF040320 | C1RL      | 0.076  | 0.774 | 0.879  | 0.037 | 0.089  | 0.697 | -0.238 | 0.237 |
| OLIGO_09411 | BF040287 | PIAS2     | 0.168  | 0.351 | 0.092  | 0.754 | -0.247 | 0.215 | 0.179  | 0.425 |
| OLIGO_09412 | AW465678 | TRAF4     | 0.041  | 0.780 | -0.032 | 0.871 | 0.231  | 0.279 | -0.685 | 0.001 |
| OLIGO_09413 | AW463371 | LPIN1     | 0.087  | 0.679 | -0.252 | 0.391 | -0.225 | 0.355 | -0.229 | 0.475 |
| OLIGO_09415 | BF046185 | SHANK3    | -0.033 | 0.884 | 0.396  | 0.405 | 0.316  | 0.394 | 0.033  | 0.902 |
| OLIGO_09417 | BF046189 | SSH2      | -0.393 | 0.187 | -0.145 | 0.688 | -0.112 | 0.667 | -0.103 | 0.640 |
| OLIGO_09420 | BF043981 | GAMT      | -0.156 | 0.520 | -0.335 | 0.384 | -0.217 | 0.508 | -0.522 | 0.060 |
| OLIGO_09421 | BF043988 | LOC515176 | -0.325 | 0.121 | 0.102  | 0.463 | 0.128  | 0.539 | 0.270  | 0.088 |
| OLIGO_09422 | BF043961 | Prkar2a   | 0.056  | 0.787 | -0.144 | 0.668 | 0.367  | 0.085 | -0.006 | 0.977 |
| OLIGO_09423 | BF043973 | RASGRP2   | -0.360 | 0.208 | 0.081  | 0.752 | 0.218  | 0.437 | -0.046 | 0.641 |
| OLIGO_09427 | BF043143 | ARHGAP29  | -0.268 | 0.287 | -0.203 | 0.586 | 0.096  | 0.747 | -0.475 | 0.039 |
| OLIGO_09435 | BF042009 | VBP1      | 0.077  | 0.716 | -0.169 | 0.546 | 0.033  | 0.869 | -0.131 | 0.402 |
| OLIGO_09444 | AW463323 | SC65      | -0.073 | 0.665 | 0.075  | 0.819 | 0.162  | 0.483 | -0.015 | 0.958 |
| OLIGO_09445 | BF045842 | RGS10     | -0.140 | 0.566 | -0.250 | 0.615 | -0.984 | 0.095 | 0.020  | 0.959 |
| OLIGO_09452 | BF043630 | MKRN1     | 0.104  | 0.622 | -0.118 | 0.631 | 0.187  | 0.533 | -0.192 | 0.281 |
| OLIGO_09453 | BF043635 | PVR       | -0.073 | 0.767 | -0.007 | 0.985 | -0.296 | 0.582 | 0.284  | 0.285 |
| OLIGO_09454 | AW461584 | DYNLL1    | -0.176 | 0.415 | 0.000  | 1.000 | -0.015 | 0.935 | -0.532 | 0.007 |
| OLIGO_09459 | BF041872 | ELMO2     | -0.390 | 0.083 | -0.068 | 0.695 | 0.200  | 0.167 | -0.170 | 0.355 |
| OLIGO_09460 | BF041841 | LOC505009 | -0.261 | 0.165 | -0.062 | 0.747 | -0.076 | 0.626 | -0.489 | 0.014 |
| OLIGO_09463 | BF039630 | MGC137693 | 0.120  | 0.463 | 0.253  | 0.098 | -0.188 | 0.312 | -0.410 | 0.027 |
| OLIGO_09466 | BF039653 | GTF2A2    | 0.589  | 0.054 | -0.603 | 0.066 | -0.081 | 0.729 | -0.079 | 0.697 |
| OLIGO_09470 | BF039875 | IMP4      | -0.029 | 0.861 | -0.093 | 0.677 | -0.135 | 0.440 | -0.602 | 0.009 |
| OLIGO_09471 | AW463237 | SFRS1     | 0.215  | 0.355 | 0.237  | 0.560 | -0.394 | 0.108 | -0.411 | 0.059 |
| OLIGO_09474 | BF039965 | RENBP     | 0.075  | 0.680 | 0.362  | 0.425 | 0.137  | 0.631 | 0.015  | 0.932 |
| OLIGO_09477 | AW463790 | LOC618128 | -0.070 | 0.773 | -0.073 | 0.782 | 0.281  | 0.416 | 0.527  | 0.170 |
| OLIGO_09478 | AW463247 | ATP6V1D   | 0.359  | 0.141 | -0.329 | 0.283 | 0.189  | 0.479 | 0.122  | 0.425 |
| OLIGO_09479 | BF045539 | BXDC5     | 0.084  | 0.654 | -0.374 | 0.067 | -0.391 | 0.063 | -0.220 | 0.373 |
| OLIGO_09480 | BF045510 | RYR1      | -0.323 | 0.010 | -0.192 | 0.366 | -0.017 | 0.901 | 0.010  | 0.954 |
| OLIGO_09486 | BF043454 | GCHFR     | -0.117 | 0.634 | -0.138 | 0.571 | 0.125  | 0.682 | -0.248 | 0.168 |
| OLIGO_09490 | BF045171 | AHCTF1    | 0.155  | 0.462 | 0.553  | 0.161 | -0.330 | 0.171 | 0.080  | 0.779 |
| OLIGO_09492 | BF041698 | ANXA11    | -0.007 | 0.978 | 0.403  | 0.112 | 0.814  | 0.090 | -0.101 | 0.503 |
| OLIGO_09493 | AW461689 | ZNF436    | 0.214  | 0.146 | 0.403  | 0.109 | 0.113  | 0.459 | 0.034  | 0.823 |
| OLIGO_09495 | AW462353 | LOC506205 | 0.259  | 0.231 | 0.277  | 0.356 | -0.024 | 0.890 | -0.275 | 0.113 |
| OLIGO_09496 | BF041538 | MDC1      | -0.519 | 0.034 | 0.145  | 0.722 | -0.050 | 0.792 | 0.022  | 0.899 |
| OLIGO_09497 | BF041680 | LOC57228  | 0.056  | 0.784 | -0.236 | 0.111 | -0.195 | 0.175 | -0.360 | 0.036 |
| OLIGO_09498 | AW463332 | PTPN11    | -0.531 | 0.164 | -0.299 | 0.240 | -0.175 | 0.578 | -0.257 | 0.346 |
| OLIGO_09500 | BF039303 | NDST2     | 0.028  | 0.924 | -0.169 | 0.599 | 0.022  | 0.952 | -0.371 | 0.102 |
| OLIGO_09501 | BF039456 | RPS24     | -0.273 | 0.379 | 0.278  | 0.575 | 0.065  | 0.920 | -0.078 | 0.835 |
| OLIGO_09503 | BF039432 | SCAP2     | 0.000  | 1.000 | 0.229  | 0.377 | 0.626  | 0.078 | -0.152 | 0.447 |
| OLIGO_09505 | AW463451 | SLC19A2   | 0.068  | 0.859 | -0.064 | 0.812 | 0.646  | 0.078 | -0.732 | 0.027 |
| OLIGO_09506 | BF045231 | ZADH1     | -0.128 | 0.460 | 0.225  | 0.341 | 0.338  | 0.126 | -0.117 | 0.580 |
| OLIGO_09518 | AW463345 | LAT2      | -0.287 | 0.419 | 0.473  | 0.403 | -0.549 | 0.143 | 0.404  | 0.059 |
| OLIGO_09523 | BM363885 | SPIRE2    | -0.161 | 0.484 | -0.101 | 0.790 | 0.139  | 0.609 | -0.321 | 0.369 |
| OLIGO_09525 | BF046308 | LOC508887 | -0.115 | 0.575 | 0.012  | 0.953 | 0.531  | 0.030 | 0.201  | 0.241 |
| OLIGO_09529 | AW463314 | NIPSNAP1  | 0.056  | 0.733 | -0.246 | 0.456 | 0.540  | 0.060 | -0.392 | 0.084 |
| OLIGO_09532 | BF039195 | LOC614309 | 0.218  | 0.322 | 0.305  | 0.435 | 0.110  | 0.836 | 0.182  | 0.602 |
| OLIGO_09534 | BF041103 | LOC615180 | -0.315 | 0.175 | -0.256 | 0.339 | 0.058  | 0.766 | -0.109 | 0.638 |
| OLIGO_09535 | AW463417 | PDLIM2    | -0.033 | 0.917 | 0.239  | 0.548 | -0.284 | 0.313 | -0.593 | 0.001 |
| OLIGO_09541 | BF044183 | LOC537418 | -0.225 | 0.442 | 0.064  | 0.700 | 0.032  | 0.809 | -0.303 | 0.152 |
| OLIGO_09544 | BM363182 | PRODH     | -0.201 | 0.309 | -0.457 | 0.361 | -0.314 | 0.012 | -0.274 | 0.201 |
| OLIGO_09550 | BF039125 | LOC505995 | -0.210 | 0.193 | -0.125 | 0.664 | -0.370 | 0.135 | 0.358  | 0.197 |
| OLIGO_09551 | BF039277 | SLC19A1   | -0.230 | 0.313 | -0.127 | 0.451 | 0.086  | 0.586 | -0.114 | 0.349 |
| OLIGO_09554 | BF040297 | LOC540159 | -0.004 | 0.985 | -0.100 | 0.683 | -0.129 | 0.459 | -0.072 | 0.626 |
| OLIGO_09561 | AW463315 | C11orf75  | 0.176  | 0.356 | -0.210 | 0.351 | 0.247  | 0.172 | 0.480  | 0.014 |
| OLIGO_09567 | BM362929 | PRSS2     | -0.014 | 0.966 | 0.082  | 0.858 | 0.283  | 0.340 | 0.589  | 0.040 |
| OLIGO_09568 | BF440395 | STK38     | -0.189 | 0.294 | -0.055 | 0.797 | -0.404 | 0.184 | 0.048  | 0.778 |
| OLIGO_09579 | BM366099 | HIST1H4I  | 0.047  | 0.842 | 0.080  | 0.902 | 0.046  | 0.932 | -1.592 | 0.000 |
| OLIGO_09582 | BM366878 | C6orf89   | -0.078 | 0.624 | -0.169 | 0.567 | 0.279  | 0.385 | -0.666 | 0.083 |
| OLIGO_09589 | BM366029 | HLA-G     | -0.020 | 0.920 | 0.664  | 0.158 | -0.175 | 0.717 | 0.126  | 0.534 |
| OLIGO_09590 | BM362685 | TAP1      | 0.103  | 0.664 | 0.148  | 0.605 | -0.433 | 0.118 | -0.195 | 0.403 |

|             |          |               |        |       |        |       |        |       |        |       |
|-------------|----------|---------------|--------|-------|--------|-------|--------|-------|--------|-------|
| OLIGO_09591 | AW463262 | LOC56902      | 0.398  | 0.061 | 0.133  | 0.625 | -0.006 | 0.975 | 0.022  | 0.923 |
| OLIGO_09592 | BM366457 | LOC54103      | -0.268 | 0.371 | 0.163  | 0.653 | -0.342 | 0.219 | -0.086 | 0.768 |
| OLIGO_09596 | BF045538 | FLJ11184      | 0.156  | 0.721 | -0.111 | 0.587 | -0.309 | 0.184 | -0.384 | 0.020 |
| OLIGO_09597 | BF043535 | ASS           | -0.162 | 0.609 | 0.542  | 0.120 | -0.039 | 0.924 | 0.076  | 0.710 |
| OLIGO_09602 | BM362493 | LMOD1         | -0.059 | 0.748 | 0.276  | 0.213 | 0.046  | 0.718 | -0.059 | 0.695 |
| OLIGO_09606 | BM364439 | PDZD11        | -0.082 | 0.461 | -0.200 | 0.505 | -0.438 | 0.071 | -0.856 | 0.000 |
| OLIGO_09607 | BM365935 | IL18RAP       | -0.195 | 0.502 | 0.110  | 0.741 | -0.695 | 0.169 | -0.604 | 0.089 |
| OLIGO_09609 | AW463251 | GALNT3        | -0.132 | 0.458 | 0.243  | 0.638 | 0.045  | 0.877 | -0.333 | 0.171 |
| OLIGO_09613 | BM364882 | PROCA1        | -0.250 | 0.429 | -0.082 | 0.791 | -0.183 | 0.457 | -0.243 | 0.400 |
| OLIGO_09614 | BM362425 | WDR79         | -0.030 | 0.825 | 0.394  | 0.211 | 0.257  | 0.382 | 0.034  | 0.870 |
| OLIGO_09615 | BF440412 | LOC652614     | 0.038  | 0.885 | 0.264  | 0.696 | -1.113 | 0.171 | 0.462  | 0.057 |
| OLIGO_09616 | AW463292 | TSC22D1       | -0.128 | 0.595 | -0.386 | 0.240 | -0.222 | 0.599 | 0.118  | 0.670 |
| OLIGO_09617 | BM364855 | PSMB8         | -0.201 | 0.343 | 0.823  | 0.112 | -0.197 | 0.504 | -0.095 | 0.655 |
| OLIGO_09619 | BM362663 | OBFC1         | -0.446 | 0.206 | -0.146 | 0.577 | -0.271 | 0.238 | -0.651 | 0.018 |
| OLIGO_09620 | AW461620 | HSD11B1       | -0.155 | 0.491 | 0.091  | 0.686 | -0.267 | 0.396 | 0.234  | 0.296 |
| OLIGO_09621 | BM363046 | DGKZ          | -0.272 | 0.109 | -0.062 | 0.822 | 0.120  | 0.525 | -0.013 | 0.934 |
| OLIGO_09623 | BM364414 | FHL3          | 0.031  | 0.852 | 0.025  | 0.931 | -0.112 | 0.533 | -0.020 | 0.883 |
| OLIGO_09624 | BF041958 | PTPN6         | -0.150 | 0.404 | 0.167  | 0.585 | 0.070  | 0.738 | -0.025 | 0.907 |
| OLIGO_09625 | BM364421 | GALE          | -0.135 | 0.314 | -0.226 | 0.592 | 0.062  | 0.731 | 0.014  | 0.914 |
| OLIGO_09626 | AW464244 | SLC11A1       | -0.222 | 0.506 | 0.333  | 0.422 | -0.311 | 0.164 | 0.611  | 0.025 |
| OLIGO_09628 | BM364454 | DTNB          | -0.685 | 0.083 | 0.223  | 0.612 | 0.361  | 0.396 | -0.164 | 0.615 |
| OLIGO_09629 | BM362196 | NDUFA10       | 0.158  | 0.458 | 0.007  | 0.977 | -0.768 | 0.013 | -0.544 | 0.007 |
| OLIGO_09634 | BM364434 | SIT1          | -0.479 | 0.044 | 0.237  | 0.398 | -0.123 | 0.442 | 0.053  | 0.757 |
| OLIGO_09639 | BM364723 | RAI16         | 0.095  | 0.537 | 0.035  | 0.891 | 0.445  | 0.078 | -0.087 | 0.650 |
| OLIGO_09643 | AW463241 | TNFRSF12A     | -0.034 | 0.789 | -0.194 | 0.515 | -0.001 | 0.996 | -0.316 | 0.356 |
| OLIGO_09644 | BM364484 | TNIP1         | -0.008 | 0.958 | -0.069 | 0.864 | -0.163 | 0.651 | -0.606 | 0.023 |
| OLIGO_09646 | BM364493 | MAGED4        | -0.382 | 0.103 | -0.515 | 0.292 | 0.461  | 0.155 | 0.008  | 0.969 |
| OLIGO_09649 | BM364506 | ITGB7         | -0.256 | 0.384 | -0.097 | 0.633 | -0.145 | 0.356 | -0.216 | 0.559 |
| OLIGO_09650 | BM364547 | INPP5B        | -0.252 | 0.306 | 0.130  | 0.553 | -0.323 | 0.103 | -0.242 | 0.374 |
| OLIGO_09651 | BM364508 | PARVG         | 0.006  | 0.979 | 0.357  | 0.486 | -0.323 | 0.466 | -0.079 | 0.716 |
| OLIGO_09653 | BM364553 | RAMP1         | -0.199 | 0.436 | 0.123  | 0.596 | -0.070 | 0.677 | -0.737 | 0.060 |
| OLIGO_09654 | BM364511 | FCHSD1        | -0.039 | 0.849 | 0.642  | 0.017 | -0.096 | 0.561 | -0.066 | 0.623 |
| OLIGO_09656 | BM365636 | C6orf204      | -0.023 | 0.950 | -0.195 | 0.608 | -0.425 | 0.184 | 0.403  | 0.187 |
| OLIGO_09657 | BM366497 | EML3          | -0.018 | 0.945 | -0.336 | 0.213 | -0.020 | 0.878 | -0.115 | 0.484 |
| OLIGO_09659 | BM361952 | VARSL         | 0.098  | 0.416 | -0.418 | 0.346 | -0.039 | 0.919 | -0.028 | 0.903 |
| OLIGO_09662 | BM364545 | JMJD2A        | -0.065 | 0.708 | -0.182 | 0.300 | -0.420 | 0.017 | -0.290 | 0.038 |
| OLIGO_09663 | BM366193 | WDFY2         | -0.405 | 0.167 | -0.102 | 0.584 | 0.226  | 0.224 | 0.107  | 0.529 |
| OLIGO_09665 | BM364563 | CD82          | 0.036  | 0.864 | 0.115  | 0.515 | 0.106  | 0.627 | -0.103 | 0.603 |
| OLIGO_09666 | AW463346 | CLDN1         | 0.006  | 0.961 | -0.260 | 0.381 | 0.690  | 0.213 | 0.057  | 0.779 |
| OLIGO_09670 | BM364584 | LONPL         | 0.297  | 0.232 | -0.305 | 0.489 | -0.711 | 0.124 | -0.265 | 0.297 |
| OLIGO_09671 | BM364733 | MICAL1        | 0.093  | 0.700 | -0.131 | 0.778 | -0.270 | 0.224 | -0.826 | 0.005 |
| OLIGO_09673 | BM362702 | ZDHHC16       | 0.016  | 0.924 | 0.300  | 0.197 | 0.012  | 0.954 | -0.242 | 0.086 |
| OLIGO_09675 | BM364692 | ANKRD13D      | -0.389 | 0.568 | -0.097 | 0.678 | -0.014 | 0.923 | -0.518 | 0.048 |
| OLIGO_09677 | BM364841 | IL10RA        | -0.132 | 0.509 | 0.105  | 0.766 | -0.222 | 0.380 | 0.045  | 0.848 |
| OLIGO_09678 | BM364859 | RNF113A       | -0.003 | 0.988 | 0.032  | 0.851 | 0.119  | 0.586 | -0.705 | 0.014 |
| OLIGO_09679 | BM362315 | HP1BP3        | -0.323 | 0.357 | -0.563 | 0.129 | -0.052 | 0.882 | -0.581 | 0.024 |
| OLIGO_09681 | BM364653 | ADRA2B        | -0.077 | 0.714 | 0.448  | 0.146 | 0.100  | 0.563 | -0.054 | 0.846 |
| OLIGO_09682 | AW463479 | C14orf101     | 0.039  | 0.823 | 0.578  | 0.298 | 0.489  | 0.071 | 0.109  | 0.567 |
| OLIGO_09683 | BM364656 | PHF15         | -0.218 | 0.439 | 0.739  | 0.116 | -0.184 | 0.739 | 0.403  | 0.162 |
| OLIGO_09686 | AW462698 | TMEM42        | 0.098  | 0.477 | 0.230  | 0.195 | -0.236 | 0.357 | -0.280 | 0.136 |
| OLIGO_09687 | BM364671 | MGC140438     | -0.127 | 0.734 | 0.471  | 0.148 | 0.063  | 0.744 | 0.056  | 0.782 |
| OLIGO_09692 | BM363854 | DKFZp761P0423 | 0.682  | 0.191 | -0.249 | 0.657 | -0.703 | 0.172 | -0.583 | 0.107 |
| OLIGO_09694 | BF040602 | RHOD          | -0.233 | 0.343 | 0.346  | 0.218 | 0.417  | 0.129 | -0.117 | 0.675 |
| OLIGO_09695 | BM364709 | PPP1R3D       | 1.427  | 0.036 | 0.260  | 0.317 | -0.117 | 0.520 | -0.420 | 0.182 |
| OLIGO_09699 | BM364755 | C21orf2       | -0.098 | 0.700 | 0.463  | 0.435 | -0.287 | 0.626 | -0.235 | 0.493 |
| OLIGO_09703 | BM364767 | EYA3          | 0.071  | 0.784 | -0.479 | 0.347 | 0.278  | 0.301 | -0.400 | 0.234 |
| OLIGO_09704 | BM364776 | RPL5          | -0.274 | 0.404 | 0.392  | 0.311 | 0.092  | 0.751 | 0.025  | 0.930 |
| OLIGO_09707 | AW463398 | IRF6          | -0.219 | 0.201 | 0.683  | 0.135 | 0.378  | 0.204 | 0.323  | 0.167 |
| OLIGO_09708 | BM362667 | TMEM16F       | -0.338 | 0.165 | 0.046  | 0.917 | -0.147 | 0.485 | 0.161  | 0.413 |
| OLIGO_09709 | BM364846 | LOC388789     | 0.023  | 0.866 | -0.043 | 0.856 | -0.002 | 0.992 | -0.134 | 0.505 |

|             |          |           |        |       |        |       |        |       |        |       |
|-------------|----------|-----------|--------|-------|--------|-------|--------|-------|--------|-------|
| OLIGO_09712 | AW463470 | CNAP1     | -0.609 | 0.076 | -0.147 | 0.765 | -0.478 | 0.369 | -0.295 | 0.313 |
| OLIGO_09714 | BM364829 | ZNF385    | 0.990  | 0.017 | -0.390 | 0.160 | -0.403 | 0.168 | -0.825 | 0.089 |
| OLIGO_09716 | BM364880 | ARL13B    | 0.079  | 0.828 | -0.405 | 0.247 | 0.146  | 0.719 | -0.524 | 0.023 |
| OLIGO_09718 | BM364784 | NCKAP1L   | -0.069 | 0.657 | 0.423  | 0.141 | -0.098 | 0.599 | -0.306 | 0.025 |
| OLIGO_09719 | BM364786 | EPSTI1    | -0.262 | 0.223 | 0.056  | 0.808 | -0.078 | 0.639 | -0.122 | 0.574 |
| OLIGO_09720 | BM364844 | ZNF174    | 0.094  | 0.574 | -0.157 | 0.776 | 0.203  | 0.566 | -0.457 | 0.209 |
| OLIGO_09721 | BM364886 | MYO9A     | 0.073  | 0.839 | -0.223 | 0.677 | -0.032 | 0.944 | -0.429 | 0.140 |
| OLIGO_09723 | BF043051 | EIF3S12   | -0.042 | 0.776 | -0.088 | 0.625 | -0.180 | 0.138 | -0.713 | 0.000 |
| OLIGO_09728 | BM366695 | MRPS15    | 0.293  | 0.113 | -0.574 | 0.200 | -0.466 | 0.099 | -0.040 | 0.873 |
| OLIGO_09729 | BM364946 | ADAM8     | -0.212 | 0.330 | 0.153  | 0.396 | -0.040 | 0.777 | -0.303 | 0.098 |
| OLIGO_09731 | AW463804 | ZWILCH    | 0.067  | 0.630 | -0.093 | 0.549 | -0.133 | 0.380 | -0.174 | 0.255 |
| OLIGO_09737 | AW461561 | COMMD2    | 0.097  | 0.504 | -0.072 | 0.800 | 0.303  | 0.235 | -0.809 | 0.001 |
| OLIGO_09738 | BM364993 | SMYD3     | -0.669 | 0.006 | 0.156  | 0.668 | -0.115 | 0.795 | -0.206 | 0.598 |
| OLIGO_09739 | BM362799 | PACAP     | -0.077 | 0.595 | -0.073 | 0.820 | 0.265  | 0.413 | -0.291 | 0.330 |
| OLIGO_09742 | BF043867 | FLJ38663  | 0.016  | 0.908 | -0.477 | 0.028 | -0.225 | 0.221 | 0.018  | 0.875 |
| OLIGO_09744 | BM362306 | HSMPP8    | -0.093 | 0.664 | -0.345 | 0.234 | -0.177 | 0.451 | -0.072 | 0.771 |
| OLIGO_09746 | BM365057 | CFP       | -0.037 | 0.855 | -0.183 | 0.707 | 0.472  | 0.232 | 0.037  | 0.875 |
| OLIGO_09747 | AW463524 | MYL9      | -0.780 | 0.033 | -0.086 | 0.806 | -0.468 | 0.036 | 0.045  | 0.836 |
| OLIGO_09749 | BM365075 | GEM       | 0.317  | 0.516 | 0.192  | 0.511 | 0.217  | 0.423 | -0.060 | 0.810 |
| OLIGO_09750 | BF042032 | EFTUD2    | -0.141 | 0.420 | 0.545  | 0.117 | 0.426  | 0.053 | -0.315 | 0.047 |
| OLIGO_09753 | BM366526 | GPR114    | -0.095 | 0.695 | 0.046  | 0.801 | 0.211  | 0.145 | -0.065 | 0.702 |
| OLIGO_09754 | BM366707 | IFI35     | -0.400 | 0.037 | 0.138  | 0.717 | -0.392 | 0.224 | 0.038  | 0.812 |
| OLIGO_09755 | BM365121 | C14orf104 | 0.405  | 0.283 | -0.057 | 0.839 | 0.029  | 0.857 | -0.138 | 0.424 |
| OLIGO_09757 | BM362846 | C9orf138  | -0.076 | 0.809 | -0.156 | 0.515 | -0.321 | 0.160 | -0.345 | 0.275 |
| OLIGO_09758 | AW463827 | C11orf71  | 0.142  | 0.546 | 0.039  | 0.823 | 0.323  | 0.164 | -0.364 | 0.019 |
| OLIGO_09759 | BM365166 | ZP3       | -0.338 | 0.355 | 0.309  | 0.508 | 0.188  | 0.504 | -0.288 | 0.391 |
| OLIGO_09763 | BM365183 | CD3E      | -0.043 | 0.961 | -0.895 | 0.058 | -0.509 | 0.424 | -0.188 | 0.696 |
| OLIGO_09764 | BM365187 | UBE2J2    | -0.099 | 0.681 | 0.267  | 0.466 | 0.805  | 0.059 | -0.012 | 0.961 |
| OLIGO_09767 | BM366535 | FAM44A    | 0.135  | 0.658 | -0.412 | 0.248 | 0.126  | 0.773 | -0.240 | 0.465 |
| OLIGO_09771 | BM362602 | PPP1R7    | 0.080  | 0.686 | 0.232  | 0.560 | -0.180 | 0.512 | -1.280 | 0.001 |
| OLIGO_09772 | BM365235 | FBXW4     | 0.154  | 0.333 | 0.330  | 0.200 | 0.062  | 0.738 | -0.100 | 0.603 |
| OLIGO_09774 | BM366289 | MPEG1     | -0.216 | 0.563 | -0.202 | 0.614 | -0.446 | 0.214 | 0.372  | 0.079 |
| OLIGO_09775 | BF040589 | IRF3      | 0.009  | 0.977 | 0.068  | 0.857 | 0.137  | 0.690 | -0.404 | 0.034 |
| OLIGO_09779 | BM361940 | LILRB2    | -0.033 | 0.819 | 0.900  | 0.159 | -0.224 | 0.648 | 0.179  | 0.523 |
| OLIGO_09782 | BM366819 | CD244     | -0.308 | 0.100 | 0.177  | 0.614 | -0.244 | 0.352 | -0.705 | 0.027 |
| OLIGO_09783 | BM365363 | ETFB      | 0.139  | 0.484 | 0.357  | 0.400 | 0.302  | 0.298 | 0.124  | 0.602 |
| OLIGO_09784 | BF046426 | NME1      | 0.105  | 0.392 | 0.669  | 0.211 | -0.242 | 0.439 | 0.266  | 0.064 |
| OLIGO_09791 | AW463507 | DYNC1I2   | 0.064  | 0.696 | 0.074  | 0.816 | 0.235  | 0.190 | 0.281  | 0.127 |
| OLIGO_09792 | BM366750 | TLK2      | -0.080 | 0.777 | 0.020  | 0.929 | 0.016  | 0.887 | -0.381 | 0.233 |
| OLIGO_09794 | BM366539 | DDX39     | -0.199 | 0.549 | -0.029 | 0.890 | -0.100 | 0.549 | -0.215 | 0.285 |
| OLIGO_09803 | AW463615 | MLLT4     | -0.560 | 0.023 | -0.065 | 0.943 | -1.221 | 0.172 | -0.398 | 0.553 |
| OLIGO_09805 | BM365637 | SPIC      | -0.300 | 0.426 | -0.061 | 0.841 | -0.403 | 0.180 | -0.454 | 0.254 |
| OLIGO_09806 | AW463810 | C14orf11  | -0.002 | 0.987 | -0.231 | 0.418 | 0.134  | 0.443 | -0.325 | 0.170 |
| OLIGO_09807 | BM366861 | GPSM3     | 0.082  | 0.786 | 0.133  | 0.578 | -0.218 | 0.450 | 0.001  | 0.997 |
| OLIGO_09808 | BM366194 | CD52      | 0.104  | 0.575 | 0.402  | 0.344 | -0.371 | 0.414 | -0.379 | 0.013 |
| OLIGO_09810 | BM366212 | CHD2      | -0.201 | 0.502 | -0.099 | 0.624 | -0.444 | 0.035 | -0.205 | 0.111 |
| OLIGO_09812 | BM365751 | SPN       | 0.136  | 0.612 | 0.154  | 0.699 | 0.012  | 0.929 | -0.014 | 0.932 |
| OLIGO_09817 | BM362463 | ATXN7     | 0.675  | 0.552 | -0.336 | 0.235 | 0.056  | 0.811 | -0.332 | 0.073 |
| OLIGO_09818 | BM366338 | IL12RB1   | -0.136 | 0.450 | -0.168 | 0.447 | 0.017  | 0.918 | -0.629 | 0.018 |
| OLIGO_09820 | BM365867 | ACAA2     | 0.164  | 0.523 | 0.071  | 0.836 | 0.091  | 0.708 | 0.152  | 0.357 |
| OLIGO_09822 | BM366767 | ZXDB      | -0.036 | 0.880 | 0.164  | 0.559 | 0.095  | 0.674 | -0.324 | 0.073 |
| OLIGO_09823 | BF045420 | TBC1D22A  | -0.276 | 0.195 | 0.123  | 0.595 | 0.082  | 0.687 | -0.308 | 0.022 |
| OLIGO_09826 | BM362253 | PLVAP     | -0.351 | 0.192 | -0.577 | 0.086 | -0.132 | 0.601 | -0.223 | 0.166 |
| OLIGO_09827 | BM365971 | C10orf76  | 0.208  | 0.341 | 0.040  | 0.849 | 0.117  | 0.540 | 0.150  | 0.260 |
| OLIGO_09830 | BM365995 | NIP30     | -0.182 | 0.314 | -0.165 | 0.460 | 0.204  | 0.374 | -0.202 | 0.172 |
| OLIGO_09831 | BM365983 | TFEB      | 0.128  | 0.714 | 0.092  | 0.687 | 0.047  | 0.809 | 0.091  | 0.611 |
| OLIGO_09832 | BM366508 | RC74      | 0.054  | 0.720 | -0.089 | 0.797 | 0.437  | 0.374 | -0.304 | 0.054 |
| OLIGO_09835 | BF043660 | EEF1D     | -0.266 | 0.123 | -0.145 | 0.709 | 0.294  | 0.332 | -0.459 | 0.009 |
| OLIGO_09838 | BM366037 | CHRN1     | -0.436 | 0.042 | 0.079  | 0.759 | -0.129 | 0.436 | 0.037  | 0.774 |
| OLIGO_09839 | BM366430 | GIMAP1    | -0.210 | 0.483 | 0.245  | 0.375 | 0.275  | 0.266 | 0.188  | 0.159 |

|             |          |              |        |       |        |       |        |       |        |       |
|-------------|----------|--------------|--------|-------|--------|-------|--------|-------|--------|-------|
| OLIGO_09841 | BM366792 | GZMH         | -0.188 | 0.187 | 0.263  | 0.371 | -0.054 | 0.786 | 0.099  | 0.578 |
| OLIGO_09846 | BM366109 | RP5-860F19.3 | -0.129 | 0.312 | 0.025  | 0.938 | 0.194  | 0.508 | -0.440 | 0.041 |
| OLIGO_09847 | BM366115 | MTERFD1      | 0.144  | 0.361 | 0.336  | 0.366 | 0.288  | 0.125 | -0.443 | 0.027 |
| OLIGO_09848 | BM363992 | ADD1         | 0.497  | 0.014 | -0.330 | 0.209 | -0.199 | 0.490 | 0.256  | 0.229 |
| OLIGO_09849 | AW463573 | DIDO1        | 0.362  | 0.469 | -0.151 | 0.500 | -0.184 | 0.193 | -0.284 | 0.262 |
| OLIGO_09850 | BM366121 | GRAP2        | 0.142  | 0.361 | 0.079  | 0.738 | -0.285 | 0.226 | -0.286 | 0.083 |
| OLIGO_09851 | BM366258 | ANKRD26      | 0.132  | 0.754 | -0.570 | 0.038 | -0.361 | 0.113 | -0.246 | 0.305 |
| OLIGO_09853 | BM366187 | SFI1         | -0.119 | 0.750 | -0.153 | 0.479 | 0.017  | 0.936 | -0.230 | 0.382 |
| OLIGO_09854 | BM366517 | SLC15A3      | 0.048  | 0.860 | 0.115  | 0.648 | 0.284  | 0.342 | -0.400 | 0.026 |
| OLIGO_09855 | BM362407 | ZCCHC8       | -0.583 | 0.092 | -0.568 | 0.116 | -0.060 | 0.787 | -0.057 | 0.793 |
| OLIGO_09856 | BM366176 | STARD13      | -0.130 | 0.510 | 0.368  | 0.191 | -0.086 | 0.550 | -0.175 | 0.182 |
| OLIGO_09857 | BM362045 | SLAMF7       | 0.022  | 0.877 | -0.216 | 0.297 | 0.165  | 0.618 | -0.009 | 0.954 |
| OLIGO_09859 | BM366406 | TPM3         | -0.376 | 0.343 | 0.175  | 0.525 | 0.150  | 0.351 | -0.207 | 0.122 |
| OLIGO_09860 | BM366248 | Ppm1f        | -0.169 | 0.551 | 0.316  | 0.287 | 0.351  | 0.040 | -0.239 | 0.157 |
| OLIGO_09861 | BM366251 | MYST4        | 0.409  | 0.162 | -0.039 | 0.874 | -0.197 | 0.461 | -0.060 | 0.785 |
| OLIGO_09862 | BM366290 | KIF5B        | -0.026 | 0.967 | -0.596 | 0.078 | -0.179 | 0.530 | -0.212 | 0.537 |
| OLIGO_09863 | BM366270 | MEF2B        | -0.042 | 0.833 | 0.308  | 0.216 | -0.023 | 0.904 | -0.194 | 0.336 |
| OLIGO_09864 | BM366296 | CENTD2       | -0.782 | 0.124 | -0.029 | 0.928 | -0.200 | 0.260 | -0.305 | 0.378 |
| OLIGO_09866 | BM366887 | KIF13B       | 0.377  | 0.469 | 0.140  | 0.618 | 0.267  | 0.362 | -0.101 | 0.536 |
| OLIGO_09867 | BM362857 | PIM2         | -0.022 | 0.936 | 0.070  | 0.775 | 0.058  | 0.701 | -0.589 | 0.006 |
| OLIGO_09869 | BM366414 | KIAA1797     | -0.002 | 0.988 | -0.257 | 0.222 | 0.153  | 0.502 | -0.073 | 0.743 |
| OLIGO_09870 | BM364921 | HMOX1        | -0.024 | 0.923 | -0.291 | 0.321 | 0.119  | 0.682 | -0.868 | 0.005 |
| OLIGO_09872 | AW463695 | TXNL1        | 0.422  | 0.082 | 0.608  | 0.191 | -0.117 | 0.731 | 0.387  | 0.132 |
| OLIGO_09873 | BM366661 | LY96         | -0.239 | 0.469 | 0.626  | 0.053 | -0.072 | 0.767 | 0.663  | 0.025 |
| OLIGO_09875 | BM366461 | LOC509006    | 0.129  | 0.610 | 0.834  | 0.074 | 0.329  | 0.317 | 0.188  | 0.357 |
| OLIGO_09881 | BM366588 | MKNK2        | 0.213  | 0.317 | 0.041  | 0.880 | 0.200  | 0.421 | -0.517 | 0.026 |
| OLIGO_09887 | AW463803 | SOLH         | -0.030 | 0.833 | 0.463  | 0.233 | 0.602  | 0.166 | -0.194 | 0.373 |
| OLIGO_09893 | AW463501 | RAB32        | -0.298 | 0.357 | 0.017  | 0.934 | -0.517 | 0.012 | -0.393 | 0.085 |
| OLIGO_09894 | BM362731 | ABI3         | -0.022 | 0.898 | 0.050  | 0.809 | -0.385 | 0.152 | -0.131 | 0.630 |
| OLIGO_09897 | BM366759 | NR4A1        | 0.011  | 0.947 | 0.356  | 0.354 | -0.158 | 0.419 | -0.125 | 0.465 |
| OLIGO_09898 | BM363012 | NPTN         | -0.300 | 0.337 | 0.092  | 0.720 | 0.250  | 0.366 | -0.016 | 0.943 |
| OLIGO_09900 | BF042129 | PPP2R5A      | -0.181 | 0.437 | 0.188  | 0.499 | -0.030 | 0.888 | 0.132  | 0.439 |
| OLIGO_09901 | BM362224 | CCDC64       | -0.159 | 0.657 | 0.387  | 0.110 | 0.382  | 0.168 | -0.316 | 0.303 |
| OLIGO_09904 | BF039286 | AIF1         | 0.102  | 0.546 | -0.177 | 0.561 | 1.253  | 0.192 | -0.692 | 0.042 |
| OLIGO_09906 | BM366897 | TNRC6B       | 0.084  | 0.596 | 0.233  | 0.678 | 0.182  | 0.695 | -0.364 | 0.358 |
| OLIGO_09907 | BM366923 | TncRNA       | -0.081 | 0.757 | -0.231 | 0.546 | -0.322 | 0.140 | -0.180 | 0.306 |
| OLIGO_09908 | AW461585 | EHMT2        | -0.598 | 0.042 | 0.071  | 0.739 | -0.063 | 0.757 | -0.220 | 0.198 |
| OLIGO_09910 | BF040148 | NPLOC4       | -0.047 | 0.798 | 0.216  | 0.535 | -0.367 | 0.153 | 0.213  | 0.364 |
| OLIGO_09911 | BM363924 | SORBS2       | -1.289 | 0.197 | 0.232  | 0.394 | -0.121 | 0.612 | 0.257  | 0.267 |
| OLIGO_09913 | BF042876 | SRRM2        | -0.155 | 0.329 | 0.281  | 0.598 | 0.273  | 0.413 | 0.269  | 0.367 |
| OLIGO_09916 | BM363874 | SURF2        | -0.333 | 0.216 | 0.003  | 0.989 | 0.225  | 0.267 | -0.068 | 0.763 |
| OLIGO_09917 | BF046108 | HDAC3        | -0.087 | 0.524 | 0.137  | 0.735 | 0.314  | 0.364 | 0.134  | 0.535 |
| OLIGO_09918 | BM363905 | GCSH         | 0.078  | 0.816 | -0.218 | 0.694 | -0.483 | 0.223 | -0.622 | 0.024 |
| OLIGO_09920 | BM362236 | PIK3R1       | 0.237  | 0.536 | 0.123  | 0.621 | -0.183 | 0.268 | -0.243 | 0.362 |
| OLIGO_09921 | BM363955 | PDZK1IP1     | -0.164 | 0.687 | -0.208 | 0.506 | -0.333 | 0.204 | -0.019 | 0.920 |
| OLIGO_09924 | BM364049 | DYNLRB1      | -0.185 | 0.382 | 0.037  | 0.885 | -0.264 | 0.285 | -0.218 | 0.178 |
| OLIGO_09925 | BM362579 | ERP29        | -0.241 | 0.279 | -0.318 | 0.360 | 0.890  | 0.072 | -0.362 | 0.031 |
| OLIGO_09927 | BM362275 | PITPNM2      | 0.020  | 0.903 | -0.010 | 0.983 | -0.121 | 0.795 | -0.097 | 0.682 |
| OLIGO_09928 | BM361817 | PCYT2        | -0.240 | 0.278 | 0.132  | 0.753 | -0.184 | 0.617 | -0.242 | 0.217 |
| OLIGO_09929 | BM361858 | PSD4         | -0.006 | 0.964 | -0.205 | 0.437 | -0.305 | 0.072 | -0.032 | 0.838 |
| OLIGO_09931 | AW464263 | PPP1R13L     | -0.629 | 0.093 | -0.054 | 0.849 | -0.134 | 0.677 | -0.770 | 0.035 |
| OLIGO_09934 | BM362796 | LOC642083    | -0.350 | 0.219 | -0.073 | 0.785 | -0.418 | 0.297 | 0.490  | 0.101 |
| OLIGO_09935 | BM362041 | AOX1         | -0.341 | 0.296 | 0.392  | 0.177 | 0.381  | 0.180 | 0.544  | 0.080 |
| OLIGO_09939 | BM362320 | C1orf142     | 0.206  | 0.510 | -0.345 | 0.242 | -0.491 | 0.106 | 0.092  | 0.699 |
| OLIGO_09941 | BM362336 | REXO1        | -0.096 | 0.571 | 0.222  | 0.453 | -0.260 | 0.232 | -0.417 | 0.035 |
| OLIGO_09942 | BM362372 | LOC532442    | 0.049  | 0.818 | -0.063 | 0.764 | -0.211 | 0.407 | -0.449 | 0.126 |
| OLIGO_09951 | BM363023 | LOC507407    | -0.144 | 0.525 | 0.036  | 0.868 | -0.470 | 0.099 | -0.243 | 0.088 |
| OLIGO_09952 | BM365594 | MS4A7        | -0.170 | 0.374 | 0.273  | 0.390 | -0.245 | 0.189 | -0.180 | 0.398 |
| OLIGO_09956 | AW464321 | SNX6         | 0.078  | 0.629 | -0.273 | 0.263 | -0.035 | 0.832 | -0.081 | 0.652 |
| OLIGO_09958 | BF044492 | ZNF655       | 0.192  | 0.779 | -0.122 | 0.584 | -0.297 | 0.180 | 0.181  | 0.160 |

|             |          |           |        |       |        |       |        |       |        |       |
|-------------|----------|-----------|--------|-------|--------|-------|--------|-------|--------|-------|
| OLIGO_09960 | AW461596 | FLJ13611  | 0.077  | 0.626 | 0.054  | 0.915 | -0.839 | 0.090 | -0.399 | 0.228 |
| OLIGO_09961 | AW464152 | GALNT6    | -0.124 | 0.780 | -0.092 | 0.679 | 0.259  | 0.390 | -0.264 | 0.314 |
| OLIGO_09963 | BF044673 | PUS1      | -0.035 | 0.850 | 0.811  | 0.057 | 0.040  | 0.898 | 0.130  | 0.617 |
| OLIGO_09971 | AW464356 | IMP3      | 0.168  | 0.240 | 0.691  | 0.110 | 0.529  | 0.052 | 0.081  | 0.683 |
| OLIGO_09972 | BF046579 | Gab1      | -0.395 | 0.613 | 0.181  | 0.517 | -0.004 | 0.976 | 0.039  | 0.852 |
| OLIGO_09974 | AW464353 | FBXO32    | -0.585 | 0.627 | 0.731  | 0.230 | -0.664 | 0.063 | 0.482  | 0.067 |
| OLIGO_09977 | AW462065 | LOC516545 | 0.132  | 0.560 | -0.199 | 0.553 | 0.188  | 0.521 | -0.393 | 0.119 |
| OLIGO_09980 | AW462453 | HIP1      | 0.093  | 0.819 | 0.589  | 0.194 | -0.037 | 0.942 | -0.259 | 0.285 |
| OLIGO_09981 | AW464363 | NAGK      | 0.021  | 0.943 | 0.704  | 0.216 | 0.528  | 0.256 | 0.130  | 0.659 |
| OLIGO_09985 | AW465716 | CENP-A    | 0.048  | 0.857 | -0.117 | 0.659 | -0.126 | 0.647 | -1.239 | 0.001 |
| OLIGO_09987 | AW465659 | ATF5      | -0.128 | 0.455 | 0.481  | 0.066 | -0.115 | 0.518 | 0.181  | 0.245 |
| OLIGO_09991 | BF040939 | ASCC1     | 0.216  | 0.261 | 0.062  | 0.828 | -0.194 | 0.511 | -0.341 | 0.136 |
| OLIGO_09993 | AW464210 | DPP4      | -0.309 | 0.379 | -0.008 | 0.983 | -0.042 | 0.929 | -0.300 | 0.265 |
| OLIGO_09995 | AW464384 | ZNF395    | -0.119 | 0.646 | 0.697  | 0.220 | -0.327 | 0.597 | -0.309 | 0.461 |
| OLIGO_09996 | AW464396 | TMCC1     | 0.157  | 0.781 | 0.184  | 0.354 | -0.533 | 0.120 | -0.001 | 0.997 |
| OLIGO_09997 | BF044726 | TDG       | 0.189  | 0.204 | -0.090 | 0.723 | 0.128  | 0.302 | -0.105 | 0.540 |
| OLIGO_10004 | BF039021 | KIAA0179  | -0.064 | 0.714 | -0.143 | 0.691 | -0.113 | 0.560 | 0.168  | 0.356 |
| OLIGO_10007 | AW464253 | DUSP16    | 0.014  | 0.939 | 0.271  | 0.377 | 0.100  | 0.588 | -0.179 | 0.377 |
| OLIGO_10013 | AW464264 | C1QTNF1   | -0.452 | 0.181 | 0.035  | 0.850 | -0.316 | 0.262 | 0.376  | 0.072 |
| OLIGO_10021 | AW461607 | PXMP3     | 0.076  | 0.511 | 0.310  | 0.246 | 0.403  | 0.284 | -0.043 | 0.877 |
| OLIGO_10026 | AW462121 | BHLHB2    | -0.162 | 0.620 | 0.257  | 0.644 | 0.148  | 0.644 | 0.023  | 0.912 |
| OLIGO_10029 | AW461930 | RNF8      | 0.113  | 0.666 | -0.180 | 0.546 | 0.137  | 0.510 | -0.181 | 0.296 |
| OLIGO_10033 | AW464763 | MRPL27    | -0.067 | 0.550 | -0.327 | 0.077 | 0.080  | 0.503 | -0.204 | 0.102 |
| OLIGO_10034 | AW462906 | LOC512236 | -0.050 | 0.670 | 0.096  | 0.595 | -0.308 | 0.069 | 0.068  | 0.622 |
| OLIGO_10039 | AW464298 | TNFRSF6B  | -0.632 | 0.396 | -0.118 | 0.666 | 0.043  | 0.828 | -0.077 | 0.767 |
| OLIGO_10048 | AW464309 | BCL2L1    | -0.729 | 0.017 | -0.653 | 0.027 | -0.149 | 0.631 | -0.424 | 0.088 |
| OLIGO_10063 | AW464141 | RCP9      | 0.090  | 0.748 | 0.713  | 0.182 | -0.709 | 0.091 | -0.038 | 0.895 |
| OLIGO_10065 | BF039906 | MGC12966  | -0.247 | 0.249 | 0.506  | 0.158 | -0.381 | 0.388 | -0.099 | 0.751 |
| OLIGO_10066 | AW461914 | SDC1      | -0.328 | 0.242 | 0.796  | 0.065 | 0.202  | 0.299 | 0.575  | 0.000 |
| OLIGO_10072 | AW466183 | MRPL11    | 0.249  | 0.257 | 0.087  | 0.722 | 0.041  | 0.846 | -0.099 | 0.647 |
| OLIGO_10073 | AW462834 | LOC388519 | 0.268  | 0.165 | -0.372 | 0.268 | 0.059  | 0.796 | -0.077 | 0.615 |
| OLIGO_10086 | AW461799 | STK25     | -0.087 | 0.794 | -0.254 | 0.231 | -0.249 | 0.187 | -0.595 | 0.022 |
| OLIGO_10091 | BF041190 | POLS      | -0.110 | 0.438 | 0.179  | 0.515 | -0.407 | 0.082 | -0.336 | 0.016 |
| OLIGO_10101 | AW464419 | C3orf60   | -0.098 | 0.748 | 0.199  | 0.589 | -0.565 | 0.116 | -0.412 | 0.063 |
| OLIGO_10109 | AW464265 | STAU1     | 0.081  | 0.563 | 0.358  | 0.358 | 0.264  | 0.555 | 1.002  | 0.069 |
| OLIGO_10114 | AW464441 | SLC25A3   | 0.062  | 0.704 | -0.197 | 0.535 | 0.007  | 0.973 | 0.326  | 0.171 |
| OLIGO_10138 | BF040604 | CCDC84    | 0.154  | 0.493 | 0.115  | 0.674 | 0.035  | 0.868 | -0.288 | 0.411 |
| OLIGO_10141 | AW461623 | UBA2      | 0.277  | 0.105 | 0.036  | 0.881 | -0.363 | 0.192 | -0.787 | 0.001 |
| OLIGO_10143 | AW464657 | LOC651252 | -0.129 | 0.458 | 0.026  | 0.916 | -0.868 | 0.098 | -0.634 | 0.029 |
| OLIGO_10145 | BF039168 | UQCRQ     | -0.046 | 0.789 | 0.110  | 0.560 | -0.030 | 0.809 | -0.466 | 0.005 |
| OLIGO_10148 | BM366000 | SFRS14    | 0.052  | 0.828 | -0.392 | 0.356 | -0.677 | 0.210 | -0.955 | 0.001 |
| OLIGO_10154 | AW461432 | TGM3      | 0.181  | 0.527 | -0.689 | 0.049 | -0.011 | 0.973 | -0.250 | 0.437 |
| OLIGO_10155 | AW464676 | PPP1CC    | 0.160  | 0.419 | 0.521  | 0.193 | 0.215  | 0.682 | 0.320  | 0.141 |
| OLIGO_10157 | AW465546 | SSRP1     | 0.012  | 0.930 | -0.474 | 0.105 | -0.414 | 0.250 | -0.905 | 0.000 |
| OLIGO_10160 | AW463344 | PRPF8     | 0.062  | 0.732 | 0.912  | 0.043 | 0.072  | 0.753 | 0.011  | 0.963 |
| OLIGO_10163 | AW462464 | DNAH17    | -0.150 | 0.230 | 0.601  | 0.115 | -0.037 | 0.871 | 0.526  | 0.088 |
| OLIGO_10164 | BF041372 | ILKAP     | 0.172  | 0.258 | 0.277  | 0.391 | 0.438  | 0.123 | 0.170  | 0.440 |
| OLIGO_10172 | AW462946 | RBM14     | 0.110  | 0.444 | 0.572  | 0.187 | 0.350  | 0.055 | 0.163  | 0.359 |
| OLIGO_10180 | AW465489 | HS2ST1    | -0.114 | 0.542 | -0.137 | 0.579 | -0.516 | 0.039 | -0.344 | 0.160 |
| OLIGO_10183 | BF042662 | TUFM      | 0.350  | 0.094 | 0.168  | 0.538 | 0.023  | 0.902 | -0.218 | 0.293 |
| OLIGO_10185 | AW462555 | YIPF6     | 0.146  | 0.653 | 0.112  | 0.694 | 0.451  | 0.019 | 0.136  | 0.424 |
| OLIGO_10194 | AW464294 | MTA2      | -0.082 | 0.751 | -0.148 | 0.582 | -0.259 | 0.343 | -0.199 | 0.407 |
| OLIGO_10200 | BF042954 | FLJ11021  | 0.089  | 0.507 | -0.154 | 0.591 | -0.092 | 0.589 | -0.083 | 0.689 |
| OLIGO_10202 | BF440490 | PGM1      | 0.013  | 0.885 | 0.160  | 0.307 | -0.492 | 0.043 | -0.288 | 0.065 |
| OLIGO_10203 | BM363900 | RGL2      | 0.034  | 0.909 | -0.279 | 0.240 | -0.299 | 0.103 | 0.006  | 0.965 |
| OLIGO_10207 | AW462408 | SERINC1   | 0.327  | 0.126 | -0.266 | 0.345 | -0.131 | 0.589 | 0.186  | 0.451 |
| OLIGO_10212 | AW464642 | DNMT3B    | 0.045  | 0.861 | 0.058  | 0.895 | -0.129 | 0.734 | -0.251 | 0.331 |
| OLIGO_10213 | AW464828 | C14orf119 | -0.118 | 0.402 | -0.063 | 0.687 | 0.120  | 0.428 | 0.153  | 0.255 |
| OLIGO_10215 | AW464690 | LAP3      | 0.190  | 0.434 | -0.040 | 0.858 | 0.486  | 0.038 | -0.274 | 0.158 |
| OLIGO_10216 | AW464701 | USF2      | -0.135 | 0.260 | 0.112  | 0.294 | -0.055 | 0.789 | -0.011 | 0.931 |

|             |          |           |        |       |        |       |        |       |        |       |
|-------------|----------|-----------|--------|-------|--------|-------|--------|-------|--------|-------|
| OLIGO_10217 | AW464562 | HRH1      | -0.019 | 0.952 | -0.087 | 0.816 | -0.576 | 0.037 | 0.038  | 0.864 |
| OLIGO_10219 | AW464623 | CBFA2T2   | 0.016  | 0.945 | -0.047 | 0.879 | -0.063 | 0.793 | -0.785 | 0.000 |
| OLIGO_10220 | AW464656 | FGFR2     | 0.012  | 0.957 | -0.131 | 0.691 | 0.502  | 0.114 | 0.396  | 0.108 |
| OLIGO_10221 | AW464669 | FAM109A   | -0.476 | 0.086 | 0.096  | 0.822 | 0.170  | 0.420 | -0.249 | 0.283 |
| OLIGO_10222 | AW464681 | COPS5     | -0.256 | 0.174 | -0.327 | 0.163 | -0.140 | 0.503 | -0.218 | 0.245 |
| OLIGO_10223 | AW464522 | GPD1L     | 0.356  | 0.246 | -0.053 | 0.869 | -0.179 | 0.206 | 0.075  | 0.659 |
| OLIGO_10224 | AW464532 | SYNGR2    | -0.175 | 0.486 | 0.004  | 0.978 | -0.166 | 0.481 | -0.127 | 0.212 |
| OLIGO_10225 | AW464702 | HOMER3    | -0.157 | 0.609 | -0.196 | 0.427 | -0.248 | 0.186 | -0.458 | 0.214 |
| OLIGO_10226 | AW464575 | FAF1      | 0.017  | 0.926 | 0.071  | 0.772 | -0.088 | 0.571 | -0.448 | 0.013 |
| OLIGO_10228 | AW464779 | MGC22793  | 0.048  | 0.741 | -0.086 | 0.837 | 0.042  | 0.857 | -0.123 | 0.524 |
| OLIGO_10230 | AW464812 | RFC2      | 0.011  | 0.939 | 0.335  | 0.313 | 0.357  | 0.209 | -0.795 | 0.001 |
| OLIGO_10231 | AW464822 | PPP4R1    | 0.218  | 0.271 | -0.319 | 0.249 | 0.394  | 0.197 | -0.207 | 0.423 |
| OLIGO_10232 | AW464523 | C19orf42  | 0.224  | 0.184 | -0.626 | 0.006 | -0.229 | 0.147 | 0.181  | 0.369 |
| OLIGO_10234 | AW464801 | ZNRD1     | 0.064  | 0.609 | -0.278 | 0.097 | -0.211 | 0.146 | -0.078 | 0.673 |
| OLIGO_10235 | AW461476 | TARSL1    | 0.007  | 0.981 | 0.116  | 0.500 | -0.155 | 0.156 | 0.100  | 0.580 |
| OLIGO_10236 | AW464671 | HAX1      | -0.387 | 0.293 | 0.129  | 0.715 | 0.148  | 0.718 | 0.286  | 0.124 |
| OLIGO_10237 | AW464513 | CALML4    | 0.013  | 0.946 | -0.044 | 0.809 | -0.318 | 0.112 | -0.270 | 0.236 |
| OLIGO_10239 | AW464586 | JMJD1B    | 0.090  | 0.735 | 0.024  | 0.922 | -0.357 | 0.047 | -0.174 | 0.441 |
| OLIGO_10240 | AW464792 | C2orf4    | 0.393  | 0.681 | 0.074  | 0.930 | -1.225 | 0.089 | -0.783 | 0.160 |
| OLIGO_10243 | AW464694 | SLC25A20  | 0.078  | 0.667 | 0.174  | 0.563 | 0.590  | 0.048 | -0.150 | 0.417 |
| OLIGO_10244 | AW464546 | BPY2IP1   | 0.220  | 0.744 | -0.350 | 0.208 | 0.019  | 0.974 | -0.465 | 0.090 |
| OLIGO_10245 | AW464717 | LOC618479 | 0.196  | 0.402 | -0.267 | 0.349 | 0.113  | 0.729 | 0.217  | 0.230 |
| OLIGO_10246 | AW464557 | ARPC1A    | 0.258  | 0.073 | -0.053 | 0.785 | 0.097  | 0.493 | -0.054 | 0.760 |
| OLIGO_10247 | BM362366 | ZBTB4     | -0.223 | 0.528 | 0.222  | 0.584 | -0.892 | 0.048 | 0.074  | 0.718 |
| OLIGO_10248 | AW461608 | CCBL1     | 0.141  | 0.284 | 0.036  | 0.945 | 0.013  | 0.974 | -0.135 | 0.619 |
| OLIGO_10250 | AW464639 | ZDHHC6    | 0.116  | 0.534 | 0.014  | 0.961 | -0.099 | 0.507 | -0.357 | 0.063 |
| OLIGO_10251 | AW464650 | PLXNA3    | -0.221 | 0.353 | 0.701  | 0.031 | -0.238 | 0.267 | -0.156 | 0.449 |
| OLIGO_10254 | AW461613 | EAF1      | 0.015  | 0.962 | 0.285  | 0.454 | 0.030  | 0.905 | 0.568  | 0.214 |
| OLIGO_10255 | AW464695 | COPS8     | 0.254  | 0.219 | 0.645  | 0.156 | -0.513 | 0.116 | 0.074  | 0.678 |
| OLIGO_10256 | AW464718 | MNAT1     | -0.036 | 0.848 | 0.194  | 0.688 | 0.072  | 0.719 | -0.094 | 0.723 |
| OLIGO_10257 | AW464567 | Samd12    | -0.280 | 0.167 | 0.589  | 0.075 | 0.626  | 0.078 | -0.576 | 0.015 |
| OLIGO_10258 | AW464751 | NCDN      | 0.103  | 0.511 | 0.736  | 0.031 | -0.039 | 0.897 | 0.601  | 0.024 |
| OLIGO_10259 | AW464794 | CRSP8     | 0.098  | 0.570 | 0.377  | 0.043 | -0.145 | 0.389 | -0.171 | 0.164 |
| OLIGO_10263 | AW464719 | PFAAP5    | 0.158  | 0.462 | 0.005  | 0.986 | -0.221 | 0.129 | 0.108  | 0.612 |
| OLIGO_10264 | AW464741 | TSC22D1   | 0.471  | 0.330 | -0.233 | 0.139 | -0.179 | 0.239 | -0.311 | 0.070 |
| OLIGO_10266 | AW464752 | SFT2D3    | -0.444 | 0.101 | 0.046  | 0.839 | -0.095 | 0.577 | -0.349 | 0.029 |
| OLIGO_10268 | AW464805 | PDE2A     | -0.236 | 0.314 | 0.516  | 0.042 | -0.268 | 0.284 | 0.081  | 0.616 |
| OLIGO_10269 | AW464817 | ZNF235    | 0.153  | 0.508 | 0.160  | 0.695 | -0.018 | 0.960 | 0.031  | 0.881 |
| OLIGO_10270 | AW464836 | PSMD5     | 0.160  | 0.213 | 0.742  | 0.104 | 0.185  | 0.472 | 0.219  | 0.253 |
| OLIGO_10272 | AW461452 | MSX1      | 0.101  | 0.554 | 0.303  | 0.169 | 0.425  | 0.065 | -0.089 | 0.665 |
| OLIGO_10273 | AW464753 | SLC20A2   | -0.167 | 0.724 | 0.195  | 0.583 | 0.089  | 0.727 | -0.226 | 0.387 |
| OLIGO_10277 | AW464776 | TXN2      | -0.005 | 0.980 | -0.151 | 0.685 | -0.118 | 0.520 | -0.213 | 0.377 |
| OLIGO_10278 | AW464530 | OCIAD1    | 0.032  | 0.826 | -0.226 | 0.494 | -0.500 | 0.101 | -0.518 | 0.029 |
| OLIGO_10279 | AW464767 | SLC35F5   | 0.191  | 0.351 | -0.087 | 0.813 | 0.273  | 0.441 | 0.033  | 0.879 |
| OLIGO_10280 | AW464509 | EIF3S6    | 0.138  | 0.418 | -0.150 | 0.622 | 0.189  | 0.573 | -0.111 | 0.667 |
| OLIGO_10282 | AW464646 | FAM82B    | 0.011  | 0.958 | -0.152 | 0.601 | 0.708  | 0.011 | -0.194 | 0.248 |
| OLIGO_10284 | AW465012 | YPEL2     | -0.360 | 0.259 | -0.028 | 0.942 | -0.017 | 0.958 | 0.332  | 0.152 |
| OLIGO_10285 | AW461477 | IMPA2     | -0.301 | 0.437 | 0.558  | 0.402 | 0.169  | 0.507 | 0.242  | 0.232 |
| OLIGO_10290 | AW464854 | HARSL     | -0.070 | 0.712 | -0.161 | 0.432 | -0.068 | 0.774 | -0.440 | 0.055 |
| OLIGO_10292 | AW465015 | PEX16     | 0.110  | 0.535 | 0.277  | 0.416 | -0.099 | 0.758 | -0.219 | 0.318 |
| OLIGO_10293 | AW465059 | USP15     | -0.050 | 0.753 | 0.058  | 0.858 | 0.381  | 0.125 | 0.195  | 0.385 |
| OLIGO_10294 | AW464915 | USP2      | -0.489 | 0.079 | 0.240  | 0.614 | 0.003  | 0.992 | 0.075  | 0.727 |
| OLIGO_10295 | AW465072 | SNX12     | 0.030  | 0.795 | 0.110  | 0.819 | 0.620  | 0.073 | 0.104  | 0.484 |
| OLIGO_10297 | AW464969 | EMD       | -0.110 | 0.528 | -0.076 | 0.832 | 0.124  | 0.485 | -0.233 | 0.275 |
| OLIGO_10298 | AW464980 | CA2       | -0.439 | 0.090 | 0.186  | 0.321 | -0.053 | 0.745 | -0.440 | 0.039 |
| OLIGO_10299 | AW461668 | DOCK8     | 0.190  | 0.666 | 0.133  | 0.800 | 0.167  | 0.566 | 0.086  | 0.722 |
| OLIGO_10301 | AW464843 | LOC401152 | -0.117 | 0.388 | -0.037 | 0.905 | -0.222 | 0.424 | 0.116  | 0.486 |
| OLIGO_10302 | AW465060 | KRT15     | -0.102 | 0.439 | -0.224 | 0.401 | -0.275 | 0.225 | -0.589 | 0.050 |
| OLIGO_10303 | AW464946 | SEC11L3   | 0.225  | 0.265 | -0.476 | 0.094 | -0.057 | 0.735 | -0.340 | 0.121 |
| OLIGO_10304 | AW464999 | KLHL21    | 0.109  | 0.870 | 0.345  | 0.428 | 0.780  | 0.005 | 0.237  | 0.440 |

|             |               |           |        |       |        |       |        |       |        |       |
|-------------|---------------|-----------|--------|-------|--------|-------|--------|-------|--------|-------|
| OLIGO_10305 | AW464844      | BPHL      | -0.113 | 0.698 | -0.072 | 0.834 | -0.385 | 0.303 | -0.418 | 0.028 |
| OLIGO_10306 | AW461532      | KIAA0196  | -0.066 | 0.595 | -0.022 | 0.942 | 0.160  | 0.477 | 0.273  | 0.146 |
| OLIGO_10307 | AW464883      | THOC6     | 0.015  | 0.939 | -0.138 | 0.386 | -0.056 | 0.606 | -0.333 | 0.159 |
| OLIGO_10308 | AW464895      | PCID1     | -0.153 | 0.224 | -0.333 | 0.251 | 0.016  | 0.944 | -0.163 | 0.317 |
| OLIGO_10309 | AW464905      | TTF1      | 0.273  | 0.051 | 0.077  | 0.798 | -0.287 | 0.304 | 0.351  | 0.286 |
| OLIGO_10310 | AW465061      | FAM103A1  | -0.033 | 0.788 | 0.033  | 0.922 | -0.232 | 0.313 | -0.105 | 0.506 |
| OLIGO_10311 | AW465067      | GDPD1     | -0.109 | 0.706 | 0.051  | 0.834 | 0.559  | 0.216 | 0.174  | 0.372 |
| OLIGO_10312 | AW464936      | AFAP      | -0.208 | 0.764 | -0.366 | 0.306 | -0.171 | 0.678 | -0.820 | 0.005 |
| OLIGO_10318 | AW465128      | STX7      | 0.016  | 0.913 | 0.125  | 0.713 | 0.139  | 0.554 | 0.202  | 0.275 |
| OLIGO_10319 | BM362427      | HLA-DRA   | -0.232 | 0.428 | 0.332  | 0.560 | -0.550 | 0.064 | -0.247 | 0.235 |
| OLIGO_10338 | BM364820      | PPIG      | -0.428 | 0.223 | 0.303  | 0.474 | -0.029 | 0.947 | -0.426 | 0.086 |
| OLIGO_10339 | BM364041      | MT        | 0.139  | 0.468 | 0.091  | 0.791 | 0.201  | 0.259 | 0.051  | 0.821 |
| OLIGO_10341 | BF043315      | STIM1     | -0.227 | 0.273 | -0.160 | 0.584 | 0.070  | 0.842 | -0.493 | 0.032 |
| OLIGO_10347 | BM362645      | LOC515773 | 0.073  | 0.756 | -0.342 | 0.256 | -0.004 | 0.992 | -0.538 | 0.039 |
| OLIGO_10349 | BF045042      | LOC651825 | -0.068 | 0.869 | -0.394 | 0.366 | 0.193  | 0.696 | -0.995 | 0.002 |
| OLIGO_10350 | BM363057      | SPR       | 0.153  | 0.376 | 0.276  | 0.552 | -0.404 | 0.329 | -0.147 | 0.357 |
| OLIGO_10355 | BF440188      | GABARAP   | 0.006  | 0.978 | 0.342  | 0.231 | 0.166  | 0.418 | 0.070  | 0.686 |
| OLIGO_10356 | BM366562      | KLF10     | 0.225  | 0.297 | -0.092 | 0.791 | -0.503 | 0.095 | 0.230  | 0.317 |
| OLIGO_10359 | AW463627      | GATAD1    | -0.024 | 0.910 | -0.144 | 0.671 | -0.483 | 0.209 | -0.158 | 0.557 |
| OLIGO_10361 | AW464101      | CHRM2     | 0.032  | 0.923 | 0.064  | 0.925 | 0.285  | 0.648 | -0.642 | 0.056 |
| OLIGO_10365 | AW463844      | MGST2     | -0.592 | 0.039 | 0.077  | 0.905 | 0.308  | 0.596 | -0.077 | 0.890 |
| OLIGO_10366 | AW461589      | NUTF2     | 0.170  | 0.308 | 0.620  | 0.023 | 5.204  | 0.052 | 0.638  | 0.072 |
| OLIGO_10375 | AW464338      | PGRMC2    | 0.085  | 0.693 | -0.279 | 0.338 | 0.275  | 0.332 | 0.363  | 0.136 |
| OLIGO_10380 | AW464482      | SMOC1     | -0.128 | 0.497 | -0.034 | 0.941 | 0.466  | 0.326 | -0.317 | 0.173 |
| OLIGO_10396 | AW465820      | BDH2      | -0.162 | 0.549 | 0.287  | 0.393 | 0.158  | 0.611 | -0.628 | 0.004 |
| OLIGO_10402 | AW465836      | VAMP3     | 0.078  | 0.654 | -0.151 | 0.508 | 0.048  | 0.825 | 0.111  | 0.487 |
| OLIGO_10408 | AW465907      | NSFL1C    | 0.073  | 0.692 | -0.191 | 0.385 | -0.142 | 0.452 | -0.407 | 0.081 |
| OLIGO_10409 | BF044746      | RBM3      | -0.291 | 0.185 | -0.047 | 0.862 | -0.519 | 0.214 | -0.456 | 0.040 |
| OLIGO_10413 | BF040840      | SLC37A2   | 0.321  | 0.429 | -0.227 | 0.656 | 0.433  | 0.523 | 0.177  | 0.479 |
| OLIGO_10417 | BF046592      | SERPING1  | -0.034 | 0.903 | 0.116  | 0.822 | 0.334  | 0.492 | -0.078 | 0.723 |
| OLIGO_10419 | BF044247      | RPL28     | -0.026 | 0.873 | 0.025  | 0.961 | -0.004 | 0.992 | -0.466 | 0.068 |
| OLIGO_10424 | BF040726      | FAM32A    | 0.284  | 0.028 | -0.418 | 0.109 | -0.083 | 0.655 | 0.031  | 0.855 |
| OLIGO_10426 | AW465279      | LOC520580 | 0.310  | 0.109 | -0.131 | 0.573 | -0.177 | 0.246 | 0.154  | 0.251 |
| OLIGO_10428 | BF045207      | FBXL11    | 0.019  | 0.937 | 0.570  | 0.223 | -0.197 | 0.507 | -0.053 | 0.740 |
| OLIGO_10431 | BF041759      | PPP1R15A  | 0.259  | 0.385 | 0.019  | 0.967 | -0.193 | 0.405 | 0.060  | 0.816 |
| OLIGO_10437 | AW461783      | PDPN      | 0.386  | 0.189 | 0.431  | 0.408 | -0.346 | 0.394 | 1.424  | 0.000 |
| OLIGO_10439 | BF043291      | DYNLT1    | -0.182 | 0.439 | -0.278 | 0.303 | 0.093  | 0.611 | -0.666 | 0.007 |
| OLIGO_10442 | AW464991      | DCN       | 0.237  | 0.797 | 0.445  | 0.512 | 0.003  | 0.995 | 0.779  | 0.012 |
| OLIGO_10456 | AW466140      | ODF2      | 0.074  | 0.616 | 0.178  | 0.250 | 0.533  | 0.102 | -0.453 | 0.024 |
| OLIGO_10460 | AW463116      | PDF       | -0.034 | 0.881 | 0.365  | 0.409 | -0.304 | 0.359 | -0.289 | 0.378 |
| OLIGO_10464 | BM361928      | SSB       | 0.191  | 0.281 | -0.037 | 0.910 | -0.474 | 0.125 | -0.390 | 0.159 |
| OLIGO_10466 | AW461813      | RPL31     | 0.001  | 0.997 | 0.339  | 0.200 | -0.059 | 0.809 | 0.633  | 0.062 |
| OLIGO_10467 | AW465831      | TMEM4     | -0.063 | 0.642 | -0.431 | 0.048 | 0.066  | 0.769 | -0.609 | 0.012 |
| OLIGO_10470 | AW462043      | MRPL52    | 0.168  | 0.162 | 0.049  | 0.860 | -0.171 | 0.398 | 0.036  | 0.871 |
| OLIGO_10473 | AW462985      | BIRC5     | 0.075  | 0.629 | -0.395 | 0.401 | 0.402  | 0.291 | -0.674 | 0.008 |
| OLIGO_10477 | AW464389      | PRDX4     | -0.038 | 0.894 | -0.032 | 0.927 | 0.157  | 0.665 | -0.194 | 0.372 |
| OLIGO_10482 | BF040656      | GANAB     | -0.151 | 0.619 | -0.098 | 0.732 | 0.286  | 0.274 | -0.316 | 0.073 |
| OLIGO_10486 | BM365159      | RPL22     | -0.149 | 0.376 | 0.054  | 0.853 | 0.087  | 0.608 | -0.409 | 0.057 |
| OLIGO_10487 | BF040560      | LOC508632 | 0.225  | 0.645 | -0.411 | 0.316 | 1.059  | 0.067 | 0.399  | 0.064 |
| OLIGO_10490 | BF045490      | ERBB2     | 0.222  | 0.401 | 0.258  | 0.156 | 0.215  | 0.427 | -0.066 | 0.726 |
| OLIGO_10504 | BF039421      | IRS1      | -0.197 | 0.335 | -0.043 | 0.792 | 0.032  | 0.824 | 0.141  | 0.334 |
| OLIGO_10505 | AW462057      | ARF4      | -0.070 | 0.730 | -0.050 | 0.864 | 0.166  | 0.510 | -0.048 | 0.785 |
| OLIGO_10509 | BF041399      | COX6A1    | 0.074  | 0.732 | -0.164 | 0.525 | -0.088 | 0.793 | -0.430 | 0.174 |
| OLIGO_10513 | BS29000129203 | TPT1      | -0.085 | 0.715 | -0.700 | 0.131 | 1.807  | 0.710 | 0.281  | 0.572 |
| OLIGO_10514 | BM364550      | S100A12   | 0.431  | 0.564 | -1.370 | 0.124 | 0.010  | 0.991 | -0.018 | 0.968 |
| OLIGO_10528 | BS29000110903 | FAU       | -0.011 | 0.959 | 0.072  | 0.770 | 0.218  | 0.514 | -0.352 | 0.135 |
| OLIGO_10535 | AW462727      | KIAA1522  | -0.148 | 0.354 | 0.021  | 0.956 | -0.037 | 0.876 | -0.975 | 0.001 |
| OLIGO_10539 | BF044704      | PCMT1     | -0.004 | 0.981 | -0.386 | 0.340 | -0.502 | 0.167 | 0.114  | 0.575 |
| OLIGO_10546 | AW466210      | DNAJB6    | -0.017 | 0.935 | -0.116 | 0.674 | -0.270 | 0.210 | -0.263 | 0.138 |
| OLIGO_10547 | AW463080      | PFN1      | 0.031  | 0.864 | 0.182  | 0.660 | 0.271  | 0.398 | 0.051  | 0.807 |



|             |               |           |        |       |        |       |        |       |        |       |
|-------------|---------------|-----------|--------|-------|--------|-------|--------|-------|--------|-------|
| OLIGO_10548 | AW462278      | JUND      | -0.292 | 0.129 | -0.004 | 0.992 | -0.398 | 0.054 | 0.013  | 0.947 |
| OLIGO_10550 | AW463406      | PAFAH1B3  | -0.071 | 0.702 | -0.475 | 0.153 | -0.325 | 0.093 | -0.357 | 0.034 |
| OLIGO_10552 | BF041198      | TF        | -0.049 | 0.812 | -0.617 | 0.463 | -0.730 | 0.140 | -0.723 | 0.043 |
| OLIGO_10553 | AW464442      | COL3A1    | -0.288 | 0.324 | -0.883 | 0.310 | 1.371  | 0.137 | 0.584  | 0.069 |
| OLIGO_10556 | BM363883      | BEX2      | -0.274 | 0.324 | 0.031  | 0.932 | -1.148 | 0.076 | -0.830 | 0.007 |
| OLIGO_10559 | BF045777      | AGPAT1    | -0.550 | 0.260 | -0.349 | 0.121 | -0.268 | 0.370 | -0.439 | 0.129 |
| OLIGO_10560 | BM362433      | EIF1AX    | -0.017 | 0.958 | -0.040 | 0.898 | -0.183 | 0.538 | -0.426 | 0.029 |
| OLIGO_10565 | AW464728      | MKRN2     | -0.665 | 0.295 | -0.197 | 0.631 | -0.316 | 0.355 | -0.268 | 0.553 |
| OLIGO_10566 | AW464444      | JOSD2     | 0.083  | 0.849 | -0.208 | 0.456 | -0.315 | 0.073 | -0.519 | 0.171 |
| OLIGO_10569 | AW462277      | LOC505788 | 0.089  | 0.684 | 0.329  | 0.450 | 0.239  | 0.387 | -0.301 | 0.115 |
| OLIGO_10570 | AW464060      | RPL12     | 0.178  | 0.263 | 0.243  | 0.603 | 0.242  | 0.454 | -0.427 | 0.082 |
| OLIGO_10572 | AW463272      | ATP6V1F   | 0.069  | 0.579 | 0.822  | 0.043 | -0.259 | 0.412 | -0.238 | 0.143 |
| OLIGO_10573 | BM366374      | RPL39     | 0.028  | 0.867 | 0.399  | 0.395 | 0.322  | 0.298 | -0.463 | 0.137 |
| OLIGO_10574 | BF040174      | ORC6L     | 0.023  | 0.921 | 0.585  | 0.190 | -0.458 | 0.133 | 0.258  | 0.208 |
| OLIGO_10575 | BF440480      | MAP1LC3B  | 0.095  | 0.598 | 0.168  | 0.540 | -0.615 | 0.042 | 0.055  | 0.730 |
| OLIGO_10576 | AW463125      | RPL41     | -0.029 | 0.865 | -0.374 | 0.365 | -0.063 | 0.877 | -0.436 | 0.075 |
| OLIGO_10577 | AW465299      | DLK1      | 0.252  | 0.407 | 0.249  | 0.470 | -0.181 | 0.374 | 0.516  | 0.302 |
| OLIGO_10579 | AW461832      | RPL18     | 0.291  | 0.105 | 0.743  | 0.170 | 0.205  | 0.473 | 0.060  | 0.775 |
| OLIGO_10583 | AW461695      | SNORA24   | -0.167 | 0.314 | 0.006  | 0.987 | -0.475 | 0.307 | 0.120  | 0.684 |
| OLIGO_10586 | AW462476      | APOA1     | 0.040  | 0.893 | -0.328 | 0.741 | 1.208  | 0.177 | 0.066  | 0.753 |
| OLIGO_10588 | AW463480      | LPHN2     | 0.140  | 0.651 | -0.504 | 0.404 | -0.127 | 0.748 | 0.226  | 0.298 |
| OLIGO_10589 | AW462524      | RPS18     | -0.089 | 0.679 | -0.395 | 0.223 | 0.306  | 0.589 | 0.014  | 0.971 |
| OLIGO_10590 | BF043110      | RPL23     | -0.020 | 0.958 | -0.178 | 0.568 | -0.108 | 0.725 | -0.261 | 0.349 |
| OLIGO_10594 | AW465453      | NDUFB10   | 0.247  | 0.106 | 0.056  | 0.904 | 0.256  | 0.407 | 0.031  | 0.886 |
| OLIGO_10595 | AW464896      | FKBP2     | -0.393 | 0.192 | 0.120  | 0.728 | 0.148  | 0.327 | 0.252  | 0.269 |
| OLIGO_10598 | AW464527      | MARCKS    | -0.005 | 0.976 | -0.376 | 0.466 | 0.237  | 0.305 | 0.245  | 0.141 |
| OLIGO_10600 | BF039685      | HSPE1     | 0.215  | 0.509 | -0.280 | 0.601 | -0.026 | 0.964 | -0.089 | 0.779 |
| OLIGO_10601 | AW462860      | AKT1      | -0.101 | 0.841 | 0.142  | 0.733 | 0.423  | 0.266 | -0.615 | 0.023 |
| OLIGO_10603 | BM366161      | CKAP1     | 0.476  | 0.028 | 0.099  | 0.746 | 0.525  | 0.114 | 0.127  | 0.504 |
| OLIGO_10606 | BF046501      | RPL37A    | 0.048  | 0.795 | -0.175 | 0.609 | 0.043  | 0.849 | -0.194 | 0.447 |
| OLIGO_10609 | BM365446      | SF3B14    | 0.176  | 0.318 | -0.268 | 0.344 | -0.037 | 0.838 | 0.285  | 0.140 |
| OLIGO_10611 | BP22000618103 | SERF2     | -0.099 | 0.543 | -0.217 | 0.636 | -0.456 | 0.274 | -0.521 | 0.103 |
| OLIGO_10612 | BF440381      | FUS       | -0.048 | 0.688 | -0.281 | 0.323 | -0.044 | 0.905 | -0.726 | 0.005 |
| OLIGO_10614 | BF440185      | RPL21     | 0.355  | 0.415 | 0.080  | 0.840 | 0.625  | 0.293 | -0.338 | 0.421 |
| OLIGO_10615 | AW462718      | RPL14     | 0.083  | 0.768 | -0.365 | 0.247 | -0.026 | 0.898 | -0.187 | 0.374 |
| OLIGO_10616 | BF045727      | APCDD1    | -0.137 | 0.695 | 0.098  | 0.824 | 0.518  | 0.287 | 0.249  | 0.286 |
| OLIGO_10618 | AW465372      | TP53I13   | -0.063 | 0.611 | -0.102 | 0.742 | 0.088  | 0.725 | 0.233  | 0.566 |
| OLIGO_10619 | AW464809      | RER1      | 0.216  | 0.223 | -0.357 | 0.433 | -0.469 | 0.263 | 0.063  | 0.687 |
| OLIGO_10623 | AW462621      | TAX1BP1   | 0.077  | 0.785 | -0.185 | 0.560 | -0.111 | 0.647 | -0.113 | 0.597 |
| OLIGO_10624 | BF041354      | HNRPC     | 0.144  | 0.312 | 0.189  | 0.415 | 0.230  | 0.319 | -0.191 | 0.310 |
| OLIGO_10627 | AW464770      | MGC133898 | 0.788  | 0.002 | 0.025  | 0.934 | 0.449  | 0.347 | -0.011 | 0.966 |
| OLIGO_10629 | AW464408      | YWHAQ     | 0.357  | 0.022 | -0.255 | 0.407 | 0.118  | 0.436 | -0.084 | 0.652 |
| OLIGO_10630 | BM363908      | C12orf57  | -0.142 | 0.595 | 0.167  | 0.611 | -0.166 | 0.457 | 0.437  | 0.119 |
| OLIGO_10632 | BF041873      | PSMA5     | 0.290  | 0.113 | -0.190 | 0.463 | -0.115 | 0.568 | -0.540 | 0.003 |
| OLIGO_10634 | BF045963      | UBE2T     | -0.868 | 0.007 | -0.270 | 0.311 | 0.265  | 0.363 | 0.009  | 0.967 |
| OLIGO_10636 | AW463305      | TPM4      | 0.170  | 0.482 | 0.124  | 0.704 | 0.294  | 0.390 | 0.383  | 0.098 |
| OLIGO_10637 | BF045567      | ID3       | -0.407 | 0.332 | -0.113 | 0.778 | -0.242 | 0.377 | -0.251 | 0.244 |
| OLIGO_10640 | BF040584      | U2AF1     | 0.152  | 0.412 | -0.442 | 0.180 | 0.290  | 0.177 | -0.149 | 0.390 |
| OLIGO_10642 | BF041903      | POLR2G    | -0.040 | 0.748 | -0.140 | 0.575 | -0.426 | 0.197 | -0.007 | 0.968 |
| OLIGO_10645 | AW464961      | TM9SF2    | 0.570  | 0.007 | -0.514 | 0.088 | 0.326  | 0.219 | 0.022  | 0.925 |
| OLIGO_10651 | AW461997      | ATP5G2    | 0.835  | 0.005 | -0.159 | 0.809 | 0.580  | 0.312 | -0.050 | 0.887 |
| OLIGO_10659 | BM363918      | RASSF1    | -0.015 | 0.955 | 0.128  | 0.625 | 0.164  | 0.180 | 0.412  | 0.177 |
| OLIGO_10660 | BM363051      | FABP3     | 0.201  | 0.350 | -0.002 | 0.995 | 0.127  | 0.610 | -0.092 | 0.784 |
| OLIGO_10662 | AW465050      | PSMB3     | 0.762  | 0.047 | -0.354 | 0.179 | 0.003  | 0.990 | 0.142  | 0.448 |
| OLIGO_10663 | BM364839      | C1orf151  | 0.383  | 0.022 | -0.385 | 0.137 | -0.068 | 0.710 | 0.010  | 0.958 |
| OLIGO_10664 | BM364736      | WTIP      | -0.036 | 0.883 | -0.064 | 0.805 | -0.154 | 0.195 | -0.103 | 0.613 |
| OLIGO_10665 | AW462723      | PIN1      | 0.171  | 0.318 | 0.125  | 0.655 | -0.215 | 0.176 | -0.178 | 0.320 |
| OLIGO_10670 | AW462478      | HTRA1     | -0.276 | 0.432 | -0.051 | 0.777 | -0.198 | 0.352 | -0.117 | 0.523 |
| OLIGO_10671 | AW463103      | CLTC      | 0.868  | 0.092 | -0.392 | 0.223 | -0.048 | 0.870 | -0.435 | 0.065 |
| OLIGO_10672 | BF041480      | API5      | 0.156  | 0.591 | -0.183 | 0.704 | -0.238 | 0.415 | -0.141 | 0.515 |

|             |               |           |        |       |        |       |        |       |        |       |
|-------------|---------------|-----------|--------|-------|--------|-------|--------|-------|--------|-------|
| OLIGO_10673 | AW465227      | ARMET     | 0.561  | 0.016 | 0.359  | 0.316 | -0.069 | 0.719 | -0.142 | 0.384 |
| OLIGO_10674 | BF045315      | LOC515860 | -0.192 | 0.467 | 0.509  | 0.349 | 0.545  | 0.123 | 0.789  | 0.003 |
| OLIGO_10676 | AW461724      | GM2A      | 0.502  | 0.174 | 0.820  | 0.062 | -0.257 | 0.392 | 0.646  | 0.011 |
| OLIGO_10681 | BM365994      | LOC653477 | 0.061  | 0.815 | -0.046 | 0.790 | -0.030 | 0.794 | 0.002  | 0.988 |
| OLIGO_10682 | AW464664      | ACTN4     | 0.331  | 0.037 | -0.209 | 0.452 | 0.095  | 0.723 | -0.146 | 0.523 |
| OLIGO_10692 | BM364015      | MYH11     | -0.026 | 0.911 | -0.176 | 0.695 | 0.059  | 0.874 | 0.316  | 0.257 |
| OLIGO_10694 | BM365986      | MAF1      | 0.190  | 0.308 | -0.111 | 0.551 | -0.035 | 0.847 | 0.097  | 0.552 |
| OLIGO_10695 | AW462111      | YAP1      | 0.329  | 0.185 | -0.305 | 0.543 | 0.223  | 0.399 | -0.121 | 0.558 |
| OLIGO_10696 | BM366675      | DAB2IP    | 0.647  | 0.193 | 0.439  | 0.252 | 0.084  | 0.716 | 0.733  | 0.165 |
| OLIGO_10697 | AW465076      | CAP1      | 0.187  | 0.360 | 0.132  | 0.677 | 0.449  | 0.110 | 0.383  | 0.186 |
| OLIGO_10699 | AW462911      | WNT4      | -0.295 | 0.260 | 0.205  | 0.476 | -0.165 | 0.439 | 0.756  | 0.008 |
| OLIGO_10702 | AW463357      | MCM7      | 0.233  | 0.228 | 0.117  | 0.543 | 0.186  | 0.169 | -0.114 | 0.680 |
| OLIGO_10708 | BM361926      | SRI       | -0.117 | 0.472 | -0.169 | 0.532 | -0.272 | 0.436 | -0.291 | 0.131 |
| OLIGO_10711 | AW462471      | COMT      | 0.137  | 0.743 | 0.135  | 0.504 | 0.217  | 0.095 | 0.234  | 0.272 |
| OLIGO_10712 | AW465714      | BSG       | 0.623  | 0.047 | 0.080  | 0.821 | 0.527  | 0.039 | 0.522  | 0.020 |
| OLIGO_10715 | AW466188      | DGUOK     | 0.061  | 0.600 | 0.099  | 0.555 | -0.129 | 0.373 | -0.013 | 0.953 |
| OLIGO_10717 | BF045031      | KLHL22    | -0.249 | 0.309 | -0.354 | 0.215 | 0.073  | 0.785 | 0.350  | 0.075 |
| OLIGO_10724 | AW465330      | HARS2     | 0.131  | 0.375 | -0.292 | 0.299 | -0.029 | 0.878 | -0.002 | 0.988 |
| OLIGO_10725 | BM362023      | GNAI2     | 0.218  | 0.222 | -0.064 | 0.774 | -0.065 | 0.732 | -0.006 | 0.972 |
| OLIGO_10726 | BM365616      | NOL5A     | 0.040  | 0.826 | -0.223 | 0.445 | 0.088  | 0.772 | 0.034  | 0.846 |
| OLIGO_10731 | AW465723      | MAST2     | 0.062  | 0.779 | -0.011 | 0.963 | 0.211  | 0.401 | -0.653 | 0.001 |
| OLIGO_10734 | AW462563      | ECHDC1    | -0.062 | 0.673 | -0.124 | 0.515 | 0.040  | 0.863 | -0.194 | 0.283 |
| OLIGO_10735 | BP22000615403 | LOC514170 | 0.513  | 0.035 | 0.218  | 0.643 | 0.167  | 0.633 | 0.785  | 0.003 |
| OLIGO_10736 | BM366447      | AP4M1     | 0.076  | 0.792 | -0.044 | 0.863 | -0.227 | 0.241 | -0.047 | 0.824 |
| OLIGO_10737 | BF044566      | ATP6V0A1  | -0.214 | 0.404 | -0.199 | 0.655 | 0.261  | 0.539 | -0.482 | 0.200 |
| OLIGO_10740 | AW463190      | CDV3      | 0.100  | 0.469 | -0.017 | 0.960 | -0.609 | 0.074 | -0.042 | 0.866 |
| OLIGO_10744 | AW461332      | PCBP2     | 0.315  | 0.181 | 0.605  | 0.278 | 0.407  | 0.358 | -0.589 | 0.009 |
| OLIGO_10745 | AW462725      | ADI1      | 0.382  | 0.199 | -0.098 | 0.771 | -0.173 | 0.539 | 0.082  | 0.787 |
| OLIGO_10747 | BF043458      | RABGGTB   | 0.730  | 0.011 | -0.738 | 0.095 | 0.325  | 0.296 | 0.452  | 0.108 |
| OLIGO_10749 | AW461719      | LSMD1     | 0.277  | 0.247 | -0.421 | 0.171 | -0.188 | 0.313 | -0.065 | 0.736 |
| OLIGO_10754 | AW464582      | C17orf80  | 0.138  | 0.631 | -0.150 | 0.258 | 0.110  | 0.607 | -0.285 | 0.067 |
| OLIGO_10756 | BM362088      | DPYSL2    | 0.074  | 0.814 | 0.314  | 0.355 | -0.479 | 0.395 | 0.367  | 0.307 |
| OLIGO_10757 | AW464746      | CCT3      | 0.096  | 0.521 | 0.531  | 0.093 | 0.097  | 0.639 | -0.433 | 0.012 |
| OLIGO_10758 | AW462674      | DES       | -0.565 | 0.179 | -0.638 | 0.132 | 0.011  | 0.954 | 0.576  | 0.018 |
| OLIGO_10759 | BF440281      | SMNDC1    | 0.326  | 0.179 | -0.496 | 0.088 | -0.133 | 0.565 | 0.005  | 0.983 |
| OLIGO_10760 | AW463707      | UBE2D2    | 0.129  | 0.309 | -0.056 | 0.877 | -0.060 | 0.873 | 0.049  | 0.830 |
| OLIGO_10761 | AW462442      | ALAD      | 0.184  | 0.221 | -0.188 | 0.702 | -0.502 | 0.103 | -0.261 | 0.223 |
| OLIGO_10763 | BF045235      | MCM4      | 0.118  | 0.627 | 0.093  | 0.680 | -0.238 | 0.163 | -0.302 | 0.113 |
| OLIGO_10766 | BM366064      | CMTM4     | 0.320  | 0.295 | -0.060 | 0.818 | -0.053 | 0.677 | 0.323  | 0.175 |
| OLIGO_10768 | AW462064      | LOC493778 | 0.048  | 0.894 | -0.029 | 0.920 | -0.187 | 0.474 | -0.890 | 0.003 |
| OLIGO_10775 | AW464781      | TADA2L    | 0.374  | 0.112 | -0.202 | 0.584 | 0.134  | 0.477 | -0.086 | 0.668 |
| OLIGO_10776 | AW465337      | S100A11   | 0.290  | 0.214 | 0.378  | 0.501 | 0.318  | 0.489 | 0.716  | 0.024 |
| OLIGO_10778 | AW462671      | Rassf3    | 0.319  | 0.083 | 0.048  | 0.861 | 0.113  | 0.675 | 0.367  | 0.110 |
| OLIGO_10779 | BF043914      | TIMM23    | 0.312  | 0.165 | -0.579 | 0.083 | -0.113 | 0.707 | -0.602 | 0.044 |
| OLIGO_10781 | AW462823      | LOC506420 | -0.241 | 0.297 | 0.380  | 0.224 | 0.378  | 0.109 | -0.282 | 0.191 |
| OLIGO_10785 | BM362412      | NICN1     | 0.294  | 0.174 | 0.190  | 0.432 | 0.201  | 0.238 | 0.320  | 0.108 |
| OLIGO_10792 | AW464944      | SAFB2     | 0.079  | 0.651 | 0.581  | 0.030 | 0.257  | 0.161 | 0.348  | 0.105 |
| OLIGO_10794 | AW464053      | PRL       | -0.168 | 0.403 | 0.070  | 0.872 | -0.265 | 0.301 | 0.082  | 0.820 |
| OLIGO_10796 | AW465322      | KIAA0284  | -0.193 | 0.442 | 0.264  | 0.385 | 0.322  | 0.240 | 0.105  | 0.655 |
| OLIGO_10799 | AW464845      | GNB1      | 0.400  | 0.042 | -0.105 | 0.606 | 0.177  | 0.552 | 0.151  | 0.386 |
| OLIGO_10810 | AW463531      | FOSL2     | 0.228  | 0.233 | -0.194 | 0.621 | 0.273  | 0.356 | 0.902  | 0.001 |
| OLIGO_10811 | AW463599      | NOS2A     | -0.186 | 0.451 | -0.158 | 0.488 | -0.095 | 0.521 | 0.351  | 0.050 |
| OLIGO_10819 | AW464420      | HIST1H1C  | 0.459  | 0.185 | -0.299 | 0.354 | -0.009 | 0.973 | 0.018  | 0.928 |
| OLIGO_10820 | AW465088      | EGR1      | -0.022 | 0.925 | 0.296  | 0.470 | 0.162  | 0.736 | 0.588  | 0.058 |
| OLIGO_10821 | AW464765      | ICAM2     | -0.317 | 0.042 | -0.134 | 0.693 | -0.322 | 0.309 | 0.405  | 0.074 |
| OLIGO_10828 | AW465472      | ZNF281    | 0.505  | 0.073 | -0.101 | 0.767 | 0.164  | 0.394 | -0.016 | 0.941 |
| OLIGO_10829 | AW465501      | ROBO4     | -0.377 | 0.161 | 0.274  | 0.241 | 0.118  | 0.454 | -0.285 | 0.110 |
| OLIGO_10831 | BF042949      | LOC509768 | 0.237  | 0.259 | 0.075  | 0.599 | 0.116  | 0.505 | 0.236  | 0.167 |
| OLIGO_10832 | AW465873      | DHX9      | 0.151  | 0.323 | -0.163 | 0.570 | -0.242 | 0.168 | 0.176  | 0.320 |
| OLIGO_10834 | AW466092      | C1orf78   | -0.212 | 0.340 | -0.182 | 0.208 | 0.054  | 0.636 | -0.054 | 0.662 |

|             |          |           |        |       |        |       |        |       |        |       |
|-------------|----------|-----------|--------|-------|--------|-------|--------|-------|--------|-------|
| OLIGO_10835 | AW466173 | AQP1      | 0.192  | 0.359 | -0.037 | 0.911 | 1.328  | 0.079 | 0.220  | 0.326 |
| OLIGO_10836 | AW466176 | C1orf107  | 0.100  | 0.389 | 0.070  | 0.815 | 0.126  | 0.512 | -0.147 | 0.372 |
| OLIGO_10837 | AW466205 | CIDEA     | 0.003  | 0.993 | 0.173  | 0.505 | 0.486  | 0.344 | -0.336 | 0.260 |
| OLIGO_10838 | BF046409 | TRIM39    | 0.173  | 0.391 | 0.101  | 0.753 | 0.446  | 0.260 | 0.344  | 0.359 |
| OLIGO_10841 | AW463172 | WDR45     | 0.497  | 0.019 | -0.077 | 0.753 | -0.089 | 0.621 | 0.554  | 0.016 |
| OLIGO_10844 | BF044179 | GRK5      | -0.081 | 0.857 | -0.178 | 0.579 | -0.447 | 0.061 | -0.056 | 0.826 |
| OLIGO_10846 | BF044216 | PKIB      | -0.294 | 0.165 | -0.339 | 0.439 | 0.260  | 0.640 | 0.516  | 0.006 |
| OLIGO_10848 | BF042446 | MS4A8B    | 0.572  | 0.016 | -0.023 | 0.934 | 0.358  | 0.250 | 0.414  | 0.064 |
| OLIGO_10854 | BF040637 | MTSS1     | 0.595  | 0.112 | -0.435 | 0.318 | 0.144  | 0.503 | 0.116  | 0.557 |
| OLIGO_10855 | BF045287 | GRB7      | 0.429  | 0.110 | -0.267 | 0.332 | 0.350  | 0.182 | -0.044 | 0.860 |
| OLIGO_10856 | AW465331 | IER3      | 0.191  | 0.411 | 0.344  | 0.490 | -0.392 | 0.259 | 0.193  | 0.400 |
| OLIGO_10857 | BF040177 | BAG1      | 0.174  | 0.169 | 0.071  | 0.847 | -0.192 | 0.341 | -0.024 | 0.898 |
| OLIGO_10861 | AW464737 | C20orf55  | 0.264  | 0.194 | 0.376  | 0.451 | 0.373  | 0.422 | 0.262  | 0.287 |
| OLIGO_10864 | BF039426 | PARP14    | -0.076 | 0.660 | 0.335  | 0.455 | -0.188 | 0.439 | -0.150 | 0.549 |
| OLIGO_10866 | AW465463 | EGLN2     | 0.217  | 0.171 | 0.412  | 0.136 | 0.132  | 0.374 | 0.528  | 0.081 |
| OLIGO_10867 | BF043167 | CLIC4     | -0.124 | 0.563 | 0.504  | 0.279 | -0.065 | 0.685 | 0.727  | 0.005 |
| OLIGO_10868 | AW461611 | MYL6      | 0.324  | 0.059 | 0.403  | 0.248 | 0.169  | 0.568 | -0.443 | 0.089 |
| OLIGO_10870 | AW463019 | LOC618700 | 0.203  | 0.132 | 0.321  | 0.134 | -0.062 | 0.607 | -0.110 | 0.485 |
| OLIGO_10873 | BF044922 | UROC1     | 0.113  | 0.582 | -0.215 | 0.456 | -0.094 | 0.616 | 0.004  | 0.990 |
| OLIGO_10875 | BF440471 | ITPA      | 0.276  | 0.168 | -0.448 | 0.106 | -0.255 | 0.291 | -0.150 | 0.404 |
| OLIGO_10880 | BF040923 | VPS28     | 0.051  | 0.738 | 0.447  | 0.033 | 0.378  | 0.237 | 0.051  | 0.725 |
| OLIGO_10881 | AW462964 | RNPC1     | -0.361 | 0.030 | -0.404 | 0.304 | 0.191  | 0.541 | 0.251  | 0.217 |
| OLIGO_10883 | BF042206 | LRDD      | 0.059  | 0.700 | -0.021 | 0.967 | 0.145  | 0.686 | -0.059 | 0.780 |
| OLIGO_10886 | BF041457 | LOC510090 | 0.131  | 0.573 | -0.018 | 0.936 | 1.100  | 0.124 | 0.110  | 0.644 |
| OLIGO_10888 | BF040446 | CD59      | 0.445  | 0.304 | 0.328  | 0.374 | -0.079 | 0.885 | -0.201 | 0.372 |
| OLIGO_10889 | BF040029 | LOC389541 | -0.124 | 0.418 | 0.178  | 0.445 | 0.236  | 0.189 | 0.082  | 0.688 |
| OLIGO_10890 | AW465209 | PKM2      | 0.076  | 0.692 | 0.023  | 0.942 | -0.008 | 0.982 | 0.518  | 0.064 |
| OLIGO_10892 | AW463195 | PRRT3     | -0.259 | 0.297 | 0.179  | 0.630 | 0.007  | 0.974 | 0.394  | 0.060 |
| OLIGO_10894 | BF045885 | TRIB3     | 0.162  | 0.312 | 0.060  | 0.831 | 0.569  | 0.050 | 0.069  | 0.761 |
| OLIGO_10897 | BF043352 | MGC134073 | 0.331  | 0.142 | 0.086  | 0.769 | -0.452 | 0.063 | -0.177 | 0.449 |
| OLIGO_10900 | BF045084 | TTYH2     | 0.101  | 0.575 | 0.114  | 0.484 | -0.174 | 0.467 | 0.292  | 0.127 |
| OLIGO_10904 | BF042233 | TBC1D4    | 0.553  | 0.101 | -0.096 | 0.708 | -0.046 | 0.789 | 0.508  | 0.014 |
| OLIGO_10906 | BF046171 | DOCK10    | -0.180 | 0.392 | 0.347  | 0.551 | -0.123 | 0.744 | 0.283  | 0.485 |
| OLIGO_10908 | AW464255 | KIAA0265  | 0.202  | 0.303 | -0.246 | 0.430 | -0.004 | 0.989 | -0.220 | 0.217 |
| OLIGO_10910 | BF042413 | RBM18     | 0.161  | 0.484 | 0.068  | 0.765 | 0.028  | 0.901 | -0.302 | 0.114 |
| OLIGO_10913 | BF045383 | LOC534051 | 0.383  | 0.007 | -0.094 | 0.648 | 0.042  | 0.737 | 0.219  | 0.087 |
| OLIGO_10914 | BF045381 | POLI      | -0.092 | 0.605 | -0.213 | 0.464 | 0.091  | 0.667 | -0.082 | 0.728 |
| OLIGO_10915 | AW466164 | LOC613430 | -0.073 | 0.798 | -0.583 | 0.008 | 0.178  | 0.505 | 0.020  | 0.915 |
| OLIGO_10917 | BF042311 | ATP1A1    | 0.049  | 0.634 | -0.293 | 0.190 | -0.306 | 0.201 | -0.099 | 0.575 |
| OLIGO_10918 | BF044734 | CKAP5     | 0.047  | 0.761 | -0.323 | 0.417 | -0.285 | 0.228 | -0.574 | 0.012 |
| OLIGO_10921 | AW464223 | ATP5J     | 0.266  | 0.013 | -0.232 | 0.289 | -0.001 | 0.994 | -0.177 | 0.224 |
| OLIGO_10923 | BM362293 | PPFIBP2   | 0.358  | 0.157 | -0.158 | 0.562 | 0.181  | 0.355 | 0.144  | 0.522 |
| OLIGO_10924 | BF039568 | GOLGA4    | 0.275  | 0.218 | -0.145 | 0.577 | 0.244  | 0.396 | 0.215  | 0.372 |
| OLIGO_10931 | BF040430 | MGC134358 | 0.068  | 0.626 | -0.148 | 0.782 | 0.605  | 0.254 | -0.117 | 0.796 |
| OLIGO_10933 | AW463410 | LRRRC32   | -0.339 | 0.199 | -0.903 | 0.046 | 0.238  | 0.659 | 0.518  | 0.022 |
| OLIGO_10936 | AW463280 | RPL5      | 0.249  | 0.247 | 0.804  | 0.018 | 0.371  | 0.007 | 0.312  | 0.270 |
| OLIGO_10941 | BF044751 | UNC119    | 0.011  | 0.958 | -0.086 | 0.792 | -0.259 | 0.098 | 0.276  | 0.414 |
| OLIGO_10943 | BM365148 | RPL35     | 0.433  | 0.143 | 0.056  | 0.946 | 0.540  | 0.396 | -0.040 | 0.929 |
| OLIGO_10944 | BM362225 | RPL37     | 0.087  | 0.679 | -0.905 | 0.070 | -0.193 | 0.496 | -0.201 | 0.386 |
| OLIGO_10945 | BM362318 | GLG1      | 0.145  | 0.563 | -0.041 | 0.900 | -0.467 | 0.050 | -0.133 | 0.487 |
| OLIGO_10946 | BM364569 | SPBC24    | 0.365  | 0.060 | -0.369 | 0.315 | 0.073  | 0.658 | -0.071 | 0.844 |
| OLIGO_10947 | BM365546 | CD5L      | -0.062 | 0.857 | 0.071  | 0.863 | -0.121 | 0.740 | -0.419 | 0.096 |
| OLIGO_10950 | BM366368 | ITGAD     | -0.583 | 0.312 | -0.013 | 0.969 | -0.355 | 0.378 | 0.099  | 0.698 |
| OLIGO_10951 | BM366758 | CD3Z      | 0.094  | 0.754 | -0.171 | 0.530 | 0.082  | 0.876 | -0.807 | 0.013 |
| OLIGO_10953 | BM362302 | PSMB10    | 0.247  | 0.249 | 0.100  | 0.741 | -0.387 | 0.047 | -0.110 | 0.610 |
| OLIGO_10954 | BM365964 | HLA-DQB1  | 0.030  | 0.888 | 0.654  | 0.321 | -0.946 | 0.202 | -0.147 | 0.492 |
| OLIGO_10955 | BM361931 | MMP19     | 0.105  | 0.467 | -0.027 | 0.937 | -0.071 | 0.712 | 0.099  | 0.650 |
| OLIGO_10958 | BM362301 | SP140     | -0.256 | 0.310 | -0.112 | 0.879 | -1.342 | 0.097 | -0.175 | 0.442 |
| OLIGO_10959 | BM363976 | CORO1A    | 0.089  | 0.801 | -0.088 | 0.827 | -0.512 | 0.277 | 0.044  | 0.783 |
| OLIGO_10961 | AW463757 | DOCK9     | 0.101  | 0.592 | 0.707  | 0.204 | -0.048 | 0.845 | 0.675  | 0.009 |

|             |               |           |        |       |        |       |        |       |        |       |
|-------------|---------------|-----------|--------|-------|--------|-------|--------|-------|--------|-------|
| OLIGO_10962 | BM362536      | CD72      | 0.107  | 0.514 | 0.500  | 0.210 | 0.528  | 0.164 | 0.368  | 0.110 |
| OLIGO_10968 | AW461494      | PGEA1     | -0.055 | 0.814 | 0.210  | 0.608 | -0.573 | 0.085 | -0.156 | 0.511 |
| OLIGO_10970 | BF040969      | MAPK1     | 0.160  | 0.298 | -0.061 | 0.823 | 0.106  | 0.731 | -0.492 | 0.135 |
| OLIGO_10972 | BM365595      | RPL38     | -0.073 | 0.606 | 0.053  | 0.816 | -0.140 | 0.363 | 0.101  | 0.573 |
| OLIGO_10975 | AW462967      | SND1      | 0.307  | 0.165 | 0.684  | 0.055 | 0.204  | 0.154 | 0.315  | 0.117 |
| OLIGO_10978 | AW464507      | HECA      | 0.050  | 0.840 | 0.030  | 0.899 | -0.280 | 0.172 | 0.034  | 0.867 |
| OLIGO_10984 | BF040230      | ERRFI1    | 0.008  | 0.980 | -0.164 | 0.666 | 0.462  | 0.273 | -0.453 | 0.148 |
| OLIGO_10987 | BP22000618003 | H1FX      | -0.284 | 0.154 | -0.039 | 0.907 | 0.076  | 0.674 | -0.283 | 0.283 |
| OLIGO_10990 | BF039192      | ANXA6     | 0.145  | 0.601 | -0.053 | 0.941 | 1.084  | 0.078 | 0.038  | 0.919 |
| OLIGO_10991 | BF044244      | STRA6     | -0.326 | 0.204 | -0.530 | 0.468 | -0.178 | 0.781 | -0.462 | 0.410 |
| OLIGO_10992 | AW465424      | CENTG3    | 0.150  | 0.412 | 0.182  | 0.657 | 0.522  | 0.099 | 0.153  | 0.516 |
| OLIGO_10994 | AW461634      | EFHA1     | 0.239  | 0.290 | -0.090 | 0.734 | -0.035 | 0.874 | -0.130 | 0.464 |
| OLIGO_11000 | AW463111      | TRIM71    | 0.107  | 0.556 | 0.334  | 0.251 | 0.358  | 0.277 | 0.562  | 0.072 |
| OLIGO_11008 | AW461884      | ANKRD43   | -0.259 | 0.163 | 0.569  | 0.249 | 0.437  | 0.198 | 0.184  | 0.490 |
| OLIGO_11020 | AW463586      | CDK2AP1   | 0.153  | 0.406 | -0.251 | 0.488 | -0.115 | 0.556 | -0.089 | 0.685 |
| OLIGO_11023 | AW463169      | MIF4GD    | -0.170 | 0.290 | -0.113 | 0.649 | -0.082 | 0.530 | 0.070  | 0.698 |
| OLIGO_11028 | BF046369      | LUC7L     | 0.078  | 0.743 | -0.023 | 0.927 | -0.086 | 0.540 | 0.129  | 0.477 |
| OLIGO_11032 | BF045367      | PEX19     | 0.315  | 0.134 | 0.557  | 0.103 | 0.334  | 0.056 | -0.101 | 0.576 |
| OLIGO_11041 | AW464049      | PLEKHA1   | 0.317  | 0.051 | -0.029 | 0.875 | 0.082  | 0.700 | -0.411 | 0.211 |
| OLIGO_11047 | AW465872      | MRPL50    | 0.319  | 0.154 | -0.297 | 0.160 | 0.132  | 0.477 | 0.048  | 0.809 |
| OLIGO_11048 | BM363983      | ATP1A1    | 0.340  | 0.203 | -0.015 | 0.955 | 0.102  | 0.766 | 0.439  | 0.135 |
| OLIGO_11049 | AW464068      | POLR2E    | -0.166 | 0.311 | 0.171  | 0.638 | -0.186 | 0.284 | -0.468 | 0.133 |
| OLIGO_11051 | BF044769      | SON       | 0.259  | 0.160 | 0.116  | 0.562 | -0.301 | 0.126 | -0.273 | 0.168 |
| OLIGO_11054 | BM362726      | GSTO1     | -0.153 | 0.280 | -0.900 | 0.032 | 0.144  | 0.707 | 0.053  | 0.814 |
| OLIGO_11056 | AW463481      | DNAJC16   | -0.036 | 0.925 | -0.119 | 0.825 | 0.000  | 0.999 | -0.116 | 0.812 |
| OLIGO_11063 | AW464647      | HIP2      | 0.312  | 0.145 | 0.461  | 0.328 | 0.394  | 0.147 | 0.094  | 0.696 |
| OLIGO_11064 | BF440584      | ZNF265    | 0.141  | 0.362 | -0.653 | 0.086 | -0.192 | 0.498 | -0.033 | 0.876 |
| OLIGO_11070 | AW465188      | CRNKL1    | 0.295  | 0.098 | 0.556  | 0.173 | 0.142  | 0.584 | 0.100  | 0.528 |
| OLIGO_11075 | BF440320      | FANCA     | 0.170  | 0.495 | -0.279 | 0.426 | 0.343  | 0.464 | -0.428 | 0.072 |
| OLIGO_11076 | BF040053      | KIF21B    | -0.245 | 0.395 | -0.395 | 0.626 | -0.439 | 0.531 | -0.359 | 0.443 |
| OLIGO_11085 | AW463697      | SOCS1     | -0.112 | 0.439 | -0.296 | 0.477 | 0.069  | 0.761 | -0.220 | 0.250 |
| OLIGO_11087 | BF440359      | RPL27A    | 0.311  | 0.294 | -0.027 | 0.959 | 0.299  | 0.393 | -0.322 | 0.257 |
| OLIGO_11089 | AW461672      | FASTK     | 0.134  | 0.258 | -0.209 | 0.281 | -0.012 | 0.942 | -0.208 | 0.172 |
| OLIGO_11090 | AW464989      | FBXO11    | -0.213 | 0.378 | -0.213 | 0.543 | -0.417 | 0.117 | -0.142 | 0.501 |
| OLIGO_11097 | BF039606      | MAD2L1    | 0.319  | 0.285 | -0.471 | 0.342 | -0.067 | 0.876 | -0.427 | 0.054 |
| OLIGO_11101 | BM366490      | KIAA0907  | 0.316  | 0.109 | -0.007 | 0.990 | -0.647 | 0.195 | -0.344 | 0.259 |
| OLIGO_11107 | AW464859      | C10orf30  | -0.332 | 0.187 | -0.132 | 0.764 | -0.453 | 0.305 | 0.142  | 0.470 |
| OLIGO_11108 | AW465809      | ITM2B     | 0.411  | 0.138 | 0.038  | 0.932 | 0.119  | 0.735 | 0.484  | 0.075 |
| OLIGO_11109 | AW461353      | PPP1R14B  | 0.086  | 0.781 | -0.147 | 0.398 | -0.064 | 0.759 | -0.370 | 0.294 |
| OLIGO_11111 | BP22000601703 | ERH       | 0.397  | 0.020 | 0.043  | 0.888 | -0.143 | 0.579 | 0.492  | 0.175 |
| OLIGO_11113 | AW462031      | KIAA0804  | -0.255 | 0.445 | -0.260 | 0.628 | -0.205 | 0.548 | -0.116 | 0.613 |
| OLIGO_11114 | AW463528      | C7orf24   | 0.184  | 0.415 | -0.229 | 0.457 | 0.393  | 0.381 | -0.319 | 0.272 |
| OLIGO_11115 | AW465786      | SPAN3     | -0.135 | 0.528 | -0.159 | 0.676 | -0.058 | 0.843 | -0.011 | 0.942 |
| OLIGO_11118 | BF041863      | LOC618652 | -0.189 | 0.574 | -0.096 | 0.912 | -1.480 | 0.122 | -0.254 | 0.700 |
| OLIGO_11126 | BF040263      | UBE2C     | 0.077  | 0.643 | 0.154  | 0.487 | -0.081 | 0.721 | -0.843 | 0.007 |
| OLIGO_11139 | AW465097      | C13orf12  | 0.046  | 0.770 | 0.004  | 0.989 | 0.030  | 0.882 | -0.020 | 0.924 |
| OLIGO_11144 | BF043455      | PSMC6     | 0.367  | 0.200 | -0.212 | 0.477 | -0.411 | 0.093 | 0.000  | 0.999 |
| OLIGO_11147 | BM366272      | TCEAL4    | -0.021 | 0.889 | -0.022 | 0.972 | -0.676 | 0.232 | -0.475 | 0.120 |
| OLIGO_11148 | BF043574      | EIF2S3    | 0.412  | 0.076 | 0.546  | 0.378 | 0.347  | 0.274 | 0.025  | 0.917 |
| OLIGO_11149 | BF044152      | MAPK3     | 0.254  | 0.177 | 0.152  | 0.637 | 0.003  | 0.990 | 0.149  | 0.594 |
| OLIGO_11153 | AW465811      | GMIP      | -0.047 | 0.723 | 0.640  | 0.085 | 0.233  | 0.272 | 0.318  | 0.174 |
| OLIGO_11156 | BF440298      | WDR41     | 0.015  | 0.950 | 0.428  | 0.482 | -0.740 | 0.110 | 0.099  | 0.754 |
| OLIGO_11157 | AW463816      | C8orf36   | 0.325  | 0.026 | 0.112  | 0.666 | -0.144 | 0.469 | 0.295  | 0.186 |
| OLIGO_11159 | AW464375      | C6orf75   | 0.128  | 0.537 | 0.087  | 0.790 | 0.105  | 0.722 | 0.139  | 0.603 |
| OLIGO_11164 | BF042169      | TEAD2     | 0.058  | 0.837 | -0.145 | 0.794 | 0.297  | 0.332 | 0.134  | 0.527 |
| OLIGO_11165 | BF042902      | KIAA0195  | -0.159 | 0.342 | 0.568  | 0.131 | 0.150  | 0.219 | 0.384  | 0.059 |
| OLIGO_11166 | AW462333      | GRRP1     | -0.325 | 0.223 | -0.085 | 0.863 | -0.120 | 0.823 | 0.043  | 0.902 |
| OLIGO_11170 | BM362383      | PDHB      | 0.198  | 0.406 | -0.325 | 0.241 | 0.231  | 0.365 | -0.424 | 0.053 |
| OLIGO_11173 | BF041278      | HSP90AA1  | 0.225  | 0.164 | -0.096 | 0.790 | 0.030  | 0.924 | -0.006 | 0.980 |
| OLIGO_11176 | BF043659      | MGC137753 | 0.227  | 0.103 | -0.085 | 0.735 | -0.165 | 0.513 | 0.283  | 0.211 |

|             |          |           |        |       |        |       |        |       |        |       |
|-------------|----------|-----------|--------|-------|--------|-------|--------|-------|--------|-------|
| OLIGO_11178 | AW464151 | MLLT10    | 0.009  | 0.971 | -0.176 | 0.622 | 0.678  | 0.030 | 0.226  | 0.333 |
| OLIGO_11188 | AW465232 | GPX4      | 0.230  | 0.485 | 0.034  | 0.843 | -0.185 | 0.346 | -0.130 | 0.586 |
| OLIGO_11190 | BM366206 | ZBTB40    | -0.221 | 0.304 | 0.125  | 0.567 | 0.076  | 0.538 | 0.164  | 0.335 |
| OLIGO_11193 | AW466113 | FLJ11806  | 0.209  | 0.219 | -0.326 | 0.117 | -0.058 | 0.645 | 0.181  | 0.204 |
| OLIGO_11195 | BM362528 | NIT1      | 0.144  | 0.307 | -0.249 | 0.246 | 0.088  | 0.481 | -0.084 | 0.672 |
| OLIGO_11196 | BM362077 | ZNF335    | 0.140  | 0.265 | 0.166  | 0.693 | 0.285  | 0.477 | 0.076  | 0.779 |
| OLIGO_11197 | BM362469 | KHDRBS1   | 0.255  | 0.183 | -0.012 | 0.969 | -0.548 | 0.131 | -0.453 | 0.029 |
| OLIGO_11198 | BM365335 | RNF123    | -0.104 | 0.623 | -0.189 | 0.494 | 0.111  | 0.408 | 0.015  | 0.931 |
| OLIGO_11201 | BF042779 | TRIM33    | 0.009  | 0.970 | -0.569 | 0.104 | 0.127  | 0.664 | -0.184 | 0.419 |
| OLIGO_11203 | BF042343 | NDUFA9    | 0.158  | 0.367 | 0.367  | 0.299 | 0.287  | 0.137 | 0.373  | 0.143 |
| OLIGO_11206 | BF044582 | DUS3L     | -0.434 | 0.001 | -0.079 | 0.740 | 0.043  | 0.730 | -0.679 | 0.016 |
| OLIGO_11210 | BF041628 | RRAGC     | -0.038 | 0.888 | 0.007  | 0.981 | -0.249 | 0.320 | 0.185  | 0.234 |
| OLIGO_11212 | AW464011 | UCKL1     | -0.073 | 0.726 | 0.213  | 0.420 | 0.063  | 0.766 | -0.381 | 0.042 |
| OLIGO_11214 | AW461407 | C1orf26   | 0.043  | 0.817 | -0.313 | 0.495 | -0.437 | 0.303 | 0.006  | 0.981 |
| OLIGO_11215 | BF440295 | TMEM87B   | 0.166  | 0.288 | -0.129 | 0.605 | 0.166  | 0.364 | 0.136  | 0.438 |
| OLIGO_11218 | BF045206 | VTI1A     | -0.035 | 0.848 | -0.025 | 0.894 | -0.035 | 0.884 | -0.019 | 0.954 |
| OLIGO_11224 | AW461512 | H3F3A     | 0.422  | 0.224 | -0.553 | 0.158 | -0.371 | 0.209 | 0.612  | 0.005 |
| OLIGO_11228 | AW461948 | LTBP4     | -0.029 | 0.917 | -0.063 | 0.844 | -0.041 | 0.831 | 0.069  | 0.685 |
| OLIGO_11231 | BM365429 | CSDE1     | 0.489  | 0.009 | -0.813 | 0.010 | 0.072  | 0.745 | 0.299  | 0.172 |
| OLIGO_11236 | AW465700 | XAB1      | -0.045 | 0.782 | 0.215  | 0.662 | 0.834  | 0.013 | -0.168 | 0.543 |
| OLIGO_11239 | BF046115 | PPP4C     | 0.314  | 0.078 | -0.077 | 0.713 | 0.149  | 0.453 | -0.002 | 0.991 |
| OLIGO_11243 | BF041741 | DRCTNNB1A | -0.142 | 0.377 | 0.069  | 0.844 | -0.139 | 0.737 | -0.144 | 0.445 |
| OLIGO_11245 | AW463368 | PC        | 0.205  | 0.229 | -0.225 | 0.178 | 0.343  | 0.251 | -0.211 | 0.244 |
| OLIGO_11248 | BM366577 | ALDH2     | 0.000  | 0.999 | 1.109  | 0.162 | 0.608  | 0.387 | 0.443  | 0.319 |
| OLIGO_11259 | AW463818 | LOC51035  | 0.179  | 0.331 | 0.070  | 0.829 | 0.506  | 0.197 | -0.136 | 0.651 |
| OLIGO_11260 | AW461725 | ABHD4     | 0.043  | 0.887 | 0.281  | 0.359 | -0.131 | 0.440 | -0.001 | 0.997 |
| OLIGO_11261 | AW462197 | RCN3      | 0.079  | 0.636 | 1.424  | 0.050 | -0.034 | 0.940 | 0.058  | 0.900 |
| OLIGO_11263 | BM361957 | RPL34     | 0.391  | 0.070 | 0.323  | 0.197 | -0.046 | 0.884 | -0.256 | 0.081 |
| OLIGO_11265 | BF045045 | MGC2749   | 0.048  | 0.781 | 0.221  | 0.185 | 0.235  | 0.193 | 0.192  | 0.398 |
| OLIGO_11267 | AW466136 | ITGB2     | -0.156 | 0.479 | 0.003  | 0.991 | -0.057 | 0.823 | -0.309 | 0.333 |
| OLIGO_11269 | BF039705 | LOC506009 | -0.029 | 0.789 | -0.012 | 0.966 | -0.241 | 0.305 | -0.101 | 0.535 |
| OLIGO_11272 | AW463176 | FBLN2     | 0.349  | 0.346 | -0.060 | 0.909 | 1.062  | 0.099 | 0.566  | 0.105 |
| OLIGO_11273 | AW463384 | NEU1      | 0.173  | 0.288 | 0.004  | 0.991 | 0.428  | 0.120 | 0.178  | 0.239 |
| OLIGO_11274 | BF045027 | ARS2      | 0.148  | 0.194 | 0.055  | 0.852 | 0.391  | 0.016 | -0.021 | 0.886 |
| OLIGO_11276 | BF046529 | KIAA1191  | 0.339  | 0.048 | 0.343  | 0.026 | -0.001 | 0.996 | 0.502  | 0.010 |
| OLIGO_11277 | BF043382 | NUP98     | 0.182  | 0.250 | -0.055 | 0.792 | 0.023  | 0.749 | 0.280  | 0.091 |
| OLIGO_11282 | BF046564 | GLE1L     | -0.574 | 0.090 | -0.205 | 0.684 | -0.184 | 0.567 | -0.511 | 0.058 |
| OLIGO_11285 | BF044532 | SCD       | -0.066 | 0.787 | -0.036 | 0.903 | 0.171  | 0.357 | -0.401 | 0.180 |
| OLIGO_11288 | BF044752 | CYBA      | 0.025  | 0.912 | -0.018 | 0.920 | 0.047  | 0.812 | 0.164  | 0.303 |
| OLIGO_11289 | AW464668 | TACSTD2   | 0.431  | 0.344 | -0.735 | 0.209 | 0.583  | 0.439 | 0.485  | 0.051 |
| OLIGO_11294 | BF043088 | ALMS1     | -0.143 | 0.404 | -0.141 | 0.709 | 0.099  | 0.716 | -0.397 | 0.097 |
| OLIGO_11296 | BM366390 | CHST11    | -0.244 | 0.248 | -0.002 | 0.992 | -0.053 | 0.739 | 0.007  | 0.967 |
| OLIGO_11297 | BF044292 | CAPZB     | 0.153  | 0.571 | -0.281 | 0.142 | 0.324  | 0.114 | 0.553  | 0.108 |
| OLIGO_11298 | BM366256 | FES       | -0.214 | 0.467 | 0.431  | 0.474 | -0.806 | 0.238 | -0.361 | 0.290 |
| OLIGO_11306 | BF039691 | MCFD2     | 0.108  | 0.646 | -0.039 | 0.891 | 0.200  | 0.567 | 0.435  | 0.055 |
| OLIGO_11307 | AW463197 | RERE      | -0.112 | 0.717 | 0.031  | 0.946 | -0.268 | 0.420 | -0.036 | 0.881 |
| OLIGO_11308 | BF041583 | EIF3S3    | 0.058  | 0.715 | 0.072  | 0.838 | 0.127  | 0.599 | -0.393 | 0.110 |
| OLIGO_11314 | BF045597 | TCEB2     | 0.406  | 0.093 | -0.052 | 0.854 | -0.384 | 0.163 | -0.199 | 0.274 |
| OLIGO_11318 | BF039163 | MMP2      | 0.139  | 0.645 | -0.374 | 0.586 | 1.602  | 0.083 | 0.754  | 0.047 |
| OLIGO_11321 | BF040847 | FAM3A     | 0.068  | 0.729 | -0.191 | 0.577 | -0.054 | 0.809 | -0.305 | 0.163 |
| OLIGO_11323 | BF045153 | RANBP9    | 0.233  | 0.090 | -0.116 | 0.720 | -0.588 | 0.030 | 0.056  | 0.813 |
| OLIGO_11324 | BF040147 | GALK1     | 0.144  | 0.345 | -0.194 | 0.533 | 0.152  | 0.415 | -0.033 | 0.827 |
| OLIGO_11325 | AW465778 | EIF3S6IP  | 0.260  | 0.129 | -0.242 | 0.434 | -0.182 | 0.414 | -0.846 | 0.003 |
| OLIGO_11326 | AW465398 | HES1      | -0.136 | 0.544 | 0.037  | 0.885 | -0.189 | 0.369 | -0.268 | 0.236 |
| OLIGO_11329 | AW465456 | TP53BP1   | 0.074  | 0.719 | -0.026 | 0.940 | -0.593 | 0.169 | -0.040 | 0.874 |
| OLIGO_11330 | AW465354 | TUBG2     | 0.105  | 0.541 | -0.012 | 0.950 | 0.231  | 0.144 | -0.287 | 0.067 |
| OLIGO_11331 | BF046205 | TXNDC4    | 0.069  | 0.740 | -0.056 | 0.874 | 0.655  | 0.117 | -0.402 | 0.178 |
| OLIGO_11332 | BF045148 | LOC509040 | -0.371 | 0.114 | 0.084  | 0.913 | 1.226  | 0.030 | -0.012 | 0.965 |
| OLIGO_11333 | BM366086 | SLC25A10  | 0.140  | 0.431 | -0.097 | 0.787 | -0.056 | 0.776 | -0.203 | 0.412 |
| OLIGO_11334 | AW464978 | HNRPL     | 0.300  | 0.126 | -0.206 | 0.352 | -0.261 | 0.247 | -0.265 | 0.155 |

|             |               |           |        |       |        |       |        |       |        |       |
|-------------|---------------|-----------|--------|-------|--------|-------|--------|-------|--------|-------|
| OLIGO_11340 | BM364002      | ITM2C     | 0.070  | 0.703 | 0.752  | 0.060 | 0.127  | 0.545 | 0.522  | 0.074 |
| OLIGO_11343 | BS29000127203 | ZNF192    | -0.045 | 0.857 | 0.085  | 0.887 | 0.351  | 0.386 | -0.377 | 0.313 |
| OLIGO_11345 | BP22000608203 | C14orf166 | 0.141  | 0.530 | 0.361  | 0.438 | 0.004  | 0.988 | -0.295 | 0.186 |
| OLIGO_11349 | AW462231      | HEXA      | 0.026  | 0.849 | -0.121 | 0.737 | 0.239  | 0.486 | 0.289  | 0.123 |
| OLIGO_11350 | AW462569      | MLKL      | -0.076 | 0.854 | -0.151 | 0.619 | 0.102  | 0.831 | 0.288  | 0.290 |
| OLIGO_11351 | BF039814      | HNRPAB    | 0.224  | 0.443 | 0.772  | 0.162 | 0.381  | 0.170 | 0.987  | 0.024 |
| OLIGO_11354 | BP22000618703 | GYG2      | 0.064  | 0.789 | -0.295 | 0.379 | 0.087  | 0.795 | -0.232 | 0.307 |
| OLIGO_11355 | AW461385      | NOP17     | 0.078  | 0.552 | -0.356 | 0.349 | -0.681 | 0.071 | -0.081 | 0.654 |
| OLIGO_11357 | AW462583      | SLCO2A1   | 0.103  | 0.613 | 0.921  | 0.006 | 0.211  | 0.186 | 0.988  | 0.007 |
| OLIGO_11358 | AW461769      | CBR1      | -0.205 | 0.268 | 0.307  | 0.357 | -0.042 | 0.872 | 0.732  | 0.034 |
| OLIGO_11362 | AW461911      | SBF1      | 0.130  | 0.648 | 0.008  | 0.982 | 0.248  | 0.410 | -0.148 | 0.395 |
| OLIGO_11363 | AW462126      | LAD1      | -0.380 | 0.106 | -0.221 | 0.218 | 0.797  | 0.648 | -0.526 | 0.028 |
| OLIGO_11364 | AW461992      | TACSTD1   | 0.340  | 0.223 | -0.192 | 0.602 | -0.032 | 0.915 | 0.290  | 0.279 |
| OLIGO_11367 | AW465360      | OSBPL9    | 0.140  | 0.713 | 0.073  | 0.822 | -0.095 | 0.710 | -0.260 | 0.249 |
| OLIGO_11368 | AW462082      | KIFC1     | -0.204 | 0.324 | -0.116 | 0.721 | 0.405  | 0.228 | 0.504  | 0.083 |
| OLIGO_11371 | AW462667      | VKORC1    | 0.021  | 0.904 | -0.218 | 0.686 | -0.351 | 0.496 | 0.128  | 0.597 |
| OLIGO_11373 | AW463297      | RAB7      | 0.076  | 0.473 | -0.028 | 0.939 | 0.460  | 0.113 | 0.347  | 0.073 |
| OLIGO_11376 | AW463226      | C5orf15   | -0.029 | 0.855 | -0.127 | 0.681 | 0.387  | 0.306 | 0.089  | 0.598 |
| OLIGO_11379 | AW461346      | GRAMD1B   | 0.241  | 0.243 | 0.080  | 0.800 | 0.370  | 0.177 | -0.129 | 0.311 |
| OLIGO_11381 | AW463402      | POR       | 0.016  | 0.920 | 0.241  | 0.088 | 0.025  | 0.746 | 0.181  | 0.174 |
| OLIGO_11382 | BF039331      | SPARC     | 0.213  | 0.404 | -0.387 | 0.522 | 0.963  | 0.078 | -0.099 | 0.719 |
| OLIGO_11386 | AW463637      | LOC643102 | 0.206  | 0.117 | 0.098  | 0.784 | -0.434 | 0.125 | 0.665  | 0.150 |
| OLIGO_11388 | AW463843      | LMAN2     | 0.324  | 0.048 | 0.082  | 0.820 | -0.030 | 0.886 | 0.383  | 0.298 |
| OLIGO_11394 | AW464260      | PEPT1     | -0.132 | 0.750 | 0.049  | 0.845 | 0.944  | 0.254 | 0.198  | 0.463 |
| OLIGO_11395 | AW464334      | GPBP1L1   | 0.089  | 0.551 | 0.085  | 0.760 | 0.466  | 0.030 | 0.243  | 0.201 |
| OLIGO_11397 | AW464411      | NPDC1     | -0.062 | 0.791 | -0.195 | 0.530 | -0.191 | 0.568 | -0.034 | 0.912 |
| OLIGO_11398 | AW461330      | DHRS9     | -0.216 | 0.481 | -0.171 | 0.650 | 1.805  | 0.154 | -0.114 | 0.620 |
| OLIGO_11399 | BS29000117603 | VASP      | -0.368 | 0.046 | -0.201 | 0.533 | 0.545  | 0.106 | 0.433  | 0.017 |
| OLIGO_11400 | AW464940      | FETUB     | 0.163  | 0.591 | 0.234  | 0.386 | -0.485 | 0.159 | 0.225  | 0.312 |
| OLIGO_11402 | AW465286      | THOC5     | 0.225  | 0.126 | -0.021 | 0.930 | 0.150  | 0.483 | -0.414 | 0.025 |
| OLIGO_11403 | AW465344      | IL22RA1   | 0.086  | 0.541 | -0.430 | 0.194 | 0.114  | 0.712 | 0.111  | 0.675 |
| OLIGO_11405 | AW465539      | LOC534323 | 0.289  | 0.374 | -0.046 | 0.863 | 0.066  | 0.701 | 0.141  | 0.408 |
| OLIGO_11408 | AW465656      | EFNB2     | -0.179 | 0.531 | -0.613 | 0.309 | 0.257  | 0.612 | 0.470  | 0.067 |
| OLIGO_11410 | AW464563      | MRPL17    | 0.093  | 0.459 | -0.118 | 0.515 | -0.069 | 0.688 | -0.191 | 0.179 |
| OLIGO_11411 | AW465817      | NDUFS2    | 0.025  | 0.879 | -0.040 | 0.881 | -0.086 | 0.623 | -0.223 | 0.086 |
| OLIGO_11413 | AW465930      | CRY2      | -0.329 | 0.186 | 0.089  | 0.723 | -0.518 | 0.093 | -0.276 | 0.128 |
| OLIGO_11416 | AW466093      | Cyhr1     | 0.461  | 0.016 | 0.117  | 0.476 | -0.077 | 0.606 | 0.270  | 0.271 |
| OLIGO_11417 | AW466167      | ROCK2     | 0.148  | 0.390 | -0.265 | 0.218 | -0.313 | 0.161 | 0.223  | 0.253 |
| OLIGO_11418 | AW466198      | MSRA      | 0.329  | 0.139 | -0.083 | 0.649 | -0.138 | 0.391 | 0.229  | 0.479 |
| OLIGO_11419 | BF039614      | MYO1D     | 0.195  | 0.283 | 0.074  | 0.695 | -0.104 | 0.541 | 0.200  | 0.307 |
| OLIGO_11420 | BF043779      | SEN3      | -0.130 | 0.630 | -0.324 | 0.220 | 0.001  | 0.996 | -0.219 | 0.209 |
| OLIGO_11422 | AW462406      | EIF2AK1   | 0.060  | 0.767 | 0.169  | 0.577 | -0.356 | 0.360 | -0.707 | 0.013 |
| OLIGO_11423 | AW462575      | AGA       | 0.166  | 0.265 | -0.581 | 0.021 | 0.169  | 0.324 | 0.537  | 0.045 |
| OLIGO_11424 | AW462492      | BTBD7     | 0.100  | 0.733 | 0.231  | 0.356 | 0.033  | 0.874 | -0.175 | 0.305 |
| OLIGO_11428 | AW462708      | ABHD6     | 0.121  | 0.634 | 0.537  | 0.147 | 0.404  | 0.047 | 0.168  | 0.477 |
| OLIGO_11430 | AW463084      | ICF45     | 0.234  | 0.151 | -0.441 | 0.048 | -0.120 | 0.596 | -0.200 | 0.424 |
| OLIGO_11431 | AW463043      | OBFC2A    | 0.047  | 0.849 | -0.313 | 0.247 | 0.558  | 0.195 | 0.209  | 0.404 |
| OLIGO_11432 | AW463174      | C20orf45  | 0.187  | 0.382 | -0.447 | 0.137 | 0.293  | 0.288 | -0.324 | 0.102 |
| OLIGO_11433 | AW463062      | KIAA0194  | 0.068  | 0.567 | -0.061 | 0.747 | 0.152  | 0.223 | -0.271 | 0.060 |
| OLIGO_11434 | BF044606      | LOXL1     | -0.254 | 0.368 | 0.383  | 0.378 | -0.129 | 0.597 | 0.264  | 0.324 |
| OLIGO_11435 | BF040208      | PLEKHA4   | 0.195  | 0.272 | 0.042  | 0.886 | -0.125 | 0.315 | 0.702  | 0.140 |
| OLIGO_11436 | BF044982      | INPP5D    | 0.045  | 0.869 | 0.881  | 0.071 | -0.058 | 0.816 | 0.677  | 0.015 |
| OLIGO_11437 | BF042635      | HOXD9     | -0.101 | 0.614 | -0.061 | 0.894 | 0.690  | 0.087 | 0.006  | 0.986 |
| OLIGO_11439 | BF045830      | PPP1R13L  | 0.027  | 0.899 | 0.146  | 0.593 | 0.100  | 0.419 | 0.509  | 0.137 |
| OLIGO_11441 | BF041175      | ITPK1     | 0.334  | 0.052 | 0.487  | 0.069 | 0.580  | 0.050 | -0.031 | 0.886 |
| OLIGO_11445 | AW466022      | FLJ13576  | -0.256 | 0.313 | 0.088  | 0.671 | -0.133 | 0.444 | -0.086 | 0.601 |
| OLIGO_11448 | BF041804      | PEPD      | 0.022  | 0.904 | -0.218 | 0.312 | 0.208  | 0.542 | 0.287  | 0.199 |
| OLIGO_11451 | BF228466      | PCMTD2    | 0.026  | 0.957 | -0.457 | 0.142 | -0.247 | 0.285 | 0.009  | 0.970 |
| OLIGO_11452 | BF040052      | TIPARP    | -0.023 | 0.932 | -0.164 | 0.556 | -0.225 | 0.352 | -0.412 | 0.117 |
| OLIGO_11453 | BF045265      | RFNG      | 0.291  | 0.238 | 0.698  | 0.079 | -0.255 | 0.192 | 0.036  | 0.896 |

|             |          |           |        |       |        |       |        |       |        |       |
|-------------|----------|-----------|--------|-------|--------|-------|--------|-------|--------|-------|
| OLIGO_11455 | AW464825 | TRIM37    | 0.218  | 0.088 | 0.216  | 0.381 | -0.460 | 0.139 | -0.096 | 0.646 |
| OLIGO_11459 | BF045455 | LOC509113 | 0.021  | 0.909 | 0.247  | 0.336 | -0.036 | 0.835 | 0.123  | 0.609 |
| OLIGO_11461 | AW463493 | CDC20     | 0.167  | 0.367 | -0.221 | 0.430 | -0.097 | 0.614 | -0.451 | 0.056 |
| OLIGO_11463 | AW465054 | NCOA4     | 0.464  | 0.106 | -0.263 | 0.408 | 0.159  | 0.419 | 0.075  | 0.689 |
| OLIGO_11465 | BF041127 | AP2A2     | 0.008  | 0.974 | -0.335 | 0.292 | 0.310  | 0.220 | 0.019  | 0.934 |
| OLIGO_11466 | AW464067 | BRD1      | -0.145 | 0.258 | -0.110 | 0.717 | 0.147  | 0.313 | 0.191  | 0.260 |
| OLIGO_11468 | BF039648 | BBX       | -0.560 | 0.055 | -0.073 | 0.822 | 0.074  | 0.740 | 0.192  | 0.339 |
| OLIGO_11469 | BF043576 | ME2       | 0.174  | 0.425 | 0.089  | 0.772 | -0.306 | 0.451 | -0.249 | 0.100 |
| OLIGO_11470 | BF043598 | RGS20     | -0.309 | 0.105 | 0.277  | 0.360 | -0.139 | 0.369 | 0.268  | 0.152 |
| OLIGO_11471 | BF041588 | TBRG4     | 0.063  | 0.728 | -0.270 | 0.210 | 0.093  | 0.513 | -0.401 | 0.008 |
| OLIGO_11476 | BF039538 | ABCA5     | 0.038  | 0.757 | 0.218  | 0.320 | -0.003 | 0.988 | -0.275 | 0.086 |
| OLIGO_11477 | BF045537 | LOC518023 | 0.051  | 0.834 | 0.280  | 0.166 | 0.356  | 0.052 | 0.394  | 0.064 |
| OLIGO_11479 | AW465927 | TM2D1     | -0.103 | 0.461 | 0.117  | 0.633 | -0.156 | 0.430 | 0.123  | 0.328 |
| OLIGO_11481 | BF044980 | ACSL1     | -0.056 | 0.729 | 0.288  | 0.277 | -0.321 | 0.149 | 0.491  | 0.066 |
| OLIGO_11485 | BF043183 | RAN       | 0.166  | 0.500 | -0.356 | 0.484 | 0.293  | 0.468 | -0.525 | 0.074 |
| OLIGO_11486 | BF041272 | TRAF3     | -0.291 | 0.242 | 0.070  | 0.877 | 0.314  | 0.513 | -0.399 | 0.141 |
| OLIGO_11487 | BF041569 | ADAM17    | 0.150  | 0.364 | -0.374 | 0.122 | 0.033  | 0.860 | 0.713  | 0.000 |
| OLIGO_11489 | BF044952 | PPP1R15B  | -0.736 | 0.016 | -0.007 | 0.972 | 0.119  | 0.372 | 0.098  | 0.539 |
| OLIGO_11490 | BF039357 | MAN1B1    | 0.027  | 0.892 | -0.132 | 0.419 | -0.066 | 0.662 | 0.474  | 0.071 |
| OLIGO_11491 | BF044939 | TSPYL6    | 0.026  | 0.816 | -0.248 | 0.196 | -0.269 | 0.104 | 0.127  | 0.487 |
| OLIGO_11493 | BF043025 | CMPK      | 0.057  | 0.729 | -0.137 | 0.572 | -0.054 | 0.806 | -0.186 | 0.234 |
| OLIGO_11496 | AW463149 | LASS2     | 0.372  | 0.010 | 0.018  | 0.922 | -0.150 | 0.318 | -0.239 | 0.137 |
| OLIGO_11498 | AW463286 | TBC1D17   | 0.201  | 0.181 | 0.073  | 0.673 | 0.625  | 0.040 | -0.087 | 0.635 |
| OLIGO_11503 | BF040606 | R3HDM2    | -0.504 | 0.070 | -0.148 | 0.570 | -0.159 | 0.481 | -0.206 | 0.301 |
| OLIGO_11504 | BF040750 | CCDC3     | -0.077 | 0.541 | 0.085  | 0.810 | 0.166  | 0.291 | 0.373  | 0.165 |
| OLIGO_11507 | AW461502 | NAGA      | 0.339  | 0.203 | -0.167 | 0.519 | 0.258  | 0.400 | 0.360  | 0.025 |
| OLIGO_11510 | BF046408 | PHF17     | -0.221 | 0.594 | 0.071  | 0.854 | -0.108 | 0.715 | -0.170 | 0.352 |
| OLIGO_11514 | AW464756 | TEAD3     | 0.134  | 0.563 | -0.319 | 0.169 | 0.004  | 0.987 | 0.028  | 0.871 |
| OLIGO_11515 | BF044514 | OCLN      | 0.590  | 0.106 | -0.276 | 0.376 | -0.021 | 0.902 | 0.463  | 0.071 |
| OLIGO_11519 | BF040109 | TAF6L     | 0.173  | 0.422 | -0.201 | 0.422 | 0.178  | 0.670 | -0.214 | 0.330 |
| OLIGO_11521 | AW464549 | SEC22B    | 0.265  | 0.109 | 0.081  | 0.855 | 0.636  | 0.063 | -0.186 | 0.396 |
| OLIGO_11522 | BF045258 | BCAP29    | -0.031 | 0.877 | 0.395  | 0.176 | 0.130  | 0.511 | -0.205 | 0.443 |
| OLIGO_11523 | AW464619 | MYBPC2    | -0.507 | 0.242 | 0.394  | 0.239 | 0.215  | 0.438 | -0.002 | 0.994 |
| OLIGO_11534 | BF039744 | PPM1A     | -0.096 | 0.594 | 0.129  | 0.814 | -0.319 | 0.460 | 0.016  | 0.966 |
| OLIGO_11537 | BF039805 | BCR       | -0.058 | 0.698 | 0.632  | 0.077 | 0.206  | 0.280 | -0.103 | 0.613 |
| OLIGO_11538 | BF040891 | RNASEH1   | 0.003  | 0.986 | 0.257  | 0.404 | -0.335 | 0.394 | 0.245  | 0.130 |
| OLIGO_11540 | BF041553 | WWC2      | -0.074 | 0.701 | 0.227  | 0.370 | 0.534  | 0.221 | 0.372  | 0.092 |
| OLIGO_11543 | AW461572 | CEBPB     | 0.358  | 0.069 | -0.034 | 0.894 | 0.516  | 0.094 | 0.541  | 0.023 |
| OLIGO_11544 | BF044077 | PRKAB1    | 0.113  | 0.376 | -0.088 | 0.667 | -0.448 | 0.051 | 0.015  | 0.939 |
| OLIGO_11547 | AW464962 | PPP1R16A  | 0.125  | 0.622 | 0.057  | 0.869 | 0.719  | 0.113 | -0.328 | 0.436 |
| OLIGO_11548 | BF044435 | ISYNA1    | 0.451  | 0.038 | -0.119 | 0.813 | 0.221  | 0.284 | -0.059 | 0.887 |
| OLIGO_11553 | BF041179 | LOC524085 | 0.085  | 0.624 | 0.019  | 0.972 | -0.331 | 0.446 | 0.028  | 0.913 |
| OLIGO_11554 | BF041165 | LOC617216 | 0.157  | 0.384 | -0.447 | 0.111 | 0.137  | 0.666 | 0.269  | 0.241 |
| OLIGO_11556 | BF044377 | FSTL1     | 0.026  | 0.942 | -0.265 | 0.514 | -0.504 | 0.098 | -0.043 | 0.910 |
| OLIGO_11557 | BF044799 | TAF11     | 0.117  | 0.549 | -0.275 | 0.422 | -0.110 | 0.606 | -0.263 | 0.266 |
| OLIGO_11560 | BF042862 | HIF1A     | 0.252  | 0.228 | -0.273 | 0.474 | 0.063  | 0.830 | 0.881  | 0.000 |
| OLIGO_11562 | BF040962 | SDC2      | -0.066 | 0.608 | -0.080 | 0.815 | -0.198 | 0.376 | 0.076  | 0.645 |
| OLIGO_11567 | BF046672 | NPTN      | 0.003  | 0.984 | -0.085 | 0.808 | 0.294  | 0.455 | -0.567 | 0.007 |
| OLIGO_11575 | BF045790 | EIF3S8    | -0.112 | 0.616 | -0.127 | 0.672 | -0.173 | 0.346 | -0.101 | 0.514 |
| OLIGO_11578 | BF042216 | MCART1    | -0.201 | 0.354 | -0.221 | 0.676 | -0.853 | 0.038 | -0.020 | 0.956 |
| OLIGO_11579 | BF039869 | MCOLN1    | -0.175 | 0.279 | 0.080  | 0.894 | 0.714  | 0.196 | 0.663  | 0.115 |
| OLIGO_11580 | BF042556 | C2orf3    | -0.268 | 0.115 | -0.108 | 0.838 | -0.634 | 0.233 | -0.111 | 0.705 |
| OLIGO_11582 | BF040286 | WNT10B    | -0.030 | 0.890 | 0.432  | 0.159 | 0.443  | 0.053 | 0.004  | 0.985 |
| OLIGO_11588 | AW463653 | MAFG      | 0.006  | 0.971 | -0.079 | 0.779 | -0.213 | 0.163 | 0.762  | 0.001 |
| OLIGO_11589 | BF044111 | AP1M1     | -0.112 | 0.723 | -0.172 | 0.462 | 0.266  | 0.461 | -0.512 | 0.054 |
| OLIGO_11590 | BF042130 | CS        | -0.135 | 0.480 | -0.083 | 0.788 | -0.378 | 0.346 | -0.377 | 0.191 |
| OLIGO_11591 | BF041426 | LRRFIP2   | 0.031  | 0.815 | 0.089  | 0.775 | 0.521  | 0.142 | 0.078  | 0.737 |
| OLIGO_11594 | AW462573 | ANXA1     | -0.013 | 0.945 | -0.212 | 0.666 | 0.295  | 0.399 | 0.070  | 0.808 |
| OLIGO_11596 | BF045844 | GNA15     | -0.018 | 0.933 | 0.191  | 0.540 | -0.049 | 0.836 | 0.166  | 0.486 |
| OLIGO_11599 | BF040948 | NUDT3     | 0.219  | 0.197 | -0.044 | 0.880 | 0.184  | 0.383 | 0.290  | 0.165 |

|             |               |               |        |       |        |       |        |       |        |       |
|-------------|---------------|---------------|--------|-------|--------|-------|--------|-------|--------|-------|
| OLIGO_11605 | BF041356      | C2orf33       | 0.054  | 0.734 | 0.125  | 0.612 | -0.220 | 0.363 | -0.150 | 0.385 |
| OLIGO_11607 | BF039462      | GART          | 0.708  | 0.016 | -0.523 | 0.049 | 0.529  | 0.051 | 0.321  | 0.322 |
| OLIGO_11609 | AW465110      | TMEM110       | 0.014  | 0.959 | 0.226  | 0.334 | -0.087 | 0.756 | -0.043 | 0.834 |
| OLIGO_11612 | AW463296      | MSX2P         | 0.587  | 0.215 | -0.128 | 0.768 | 0.476  | 0.206 | 0.162  | 0.340 |
| OLIGO_11613 | BF045239      | C12orf44      | 0.122  | 0.449 | -0.186 | 0.342 | -0.133 | 0.391 | -0.502 | 0.038 |
| OLIGO_11622 | AW464957      | Rgl1          | 0.124  | 0.631 | 0.017  | 0.939 | -0.112 | 0.494 | -0.116 | 0.562 |
| OLIGO_11630 | BF041679      | LOC285636     | -0.081 | 0.819 | -0.100 | 0.738 | -0.433 | 0.264 | -0.156 | 0.405 |
| OLIGO_11633 | BF039828      | LOC511619     | 0.262  | 0.348 | 0.019  | 0.965 | 0.291  | 0.250 | -0.319 | 0.067 |
| OLIGO_11634 | BF039890      | VDAC1         | 0.206  | 0.234 | 0.183  | 0.493 | 0.234  | 0.385 | 0.236  | 0.211 |
| OLIGO_11636 | BF043262      | TOLLIP        | -0.129 | 0.635 | 0.025  | 0.916 | 0.333  | 0.003 | -0.251 | 0.087 |
| OLIGO_11637 | BF042308      | NUP85         | -0.077 | 0.754 | 0.208  | 0.151 | -0.095 | 0.592 | 0.190  | 0.434 |
| OLIGO_11646 | BF440401      | HLA-DQA1      | -0.108 | 0.593 | 0.753  | 0.132 | -0.177 | 0.444 | -0.248 | 0.389 |
| OLIGO_11647 | BS29000113203 | Abhd12        | 0.272  | 0.169 | 0.061  | 0.826 | 0.145  | 0.345 | 0.015  | 0.941 |
| OLIGO_11648 | BS29000120303 | SMAD4         | 0.327  | 0.012 | 0.032  | 0.906 | -0.113 | 0.617 | 0.083  | 0.680 |
| OLIGO_11650 | BS29000124903 | LOC618283     | -0.047 | 0.837 | -0.121 | 0.706 | -0.477 | 0.090 | -0.274 | 0.134 |
| OLIGO_11659 | BS29000192703 | MATR3         | 0.110  | 0.484 | -0.377 | 0.531 | 0.041  | 0.881 | 0.133  | 0.607 |
| OLIGO_11667 | BM362434      | TRA@          | -0.257 | 0.397 | 0.231  | 0.493 | -0.062 | 0.852 | -0.210 | 0.256 |
| OLIGO_11668 | BM362620      | KIF4A         | -0.029 | 0.793 | 0.206  | 0.713 | 0.064  | 0.815 | -0.050 | 0.788 |
| OLIGO_11669 | BF039061      | GMPPA         | 0.072  | 0.616 | 0.207  | 0.259 | 0.141  | 0.418 | -0.028 | 0.869 |
| OLIGO_11671 | BF041610      | RPRC1         | -0.179 | 0.601 | 0.006  | 0.983 | -0.178 | 0.638 | 0.034  | 0.891 |
| OLIGO_11672 | BM362267      | AURKB         | 0.223  | 0.127 | -0.062 | 0.845 | 0.214  | 0.467 | -0.201 | 0.249 |
| OLIGO_11673 | BM366906      | TNFAIP8L2     | -0.689 | 0.032 | -0.355 | 0.176 | -0.244 | 0.156 | -0.228 | 0.301 |
| OLIGO_11674 | BM363086      | C1orf2        | -0.134 | 0.586 | -0.047 | 0.819 | -0.153 | 0.283 | -0.079 | 0.608 |
| OLIGO_11675 | BF043134      | SS18L2        | 0.475  | 0.003 | -0.494 | 0.071 | -0.243 | 0.219 | 0.064  | 0.745 |
| OLIGO_11676 | BF045676      | DCTN3         | 0.170  | 0.192 | -0.064 | 0.754 | 0.065  | 0.769 | -0.522 | 0.002 |
| OLIGO_11680 | BM366863      | PSMB9         | 0.039  | 0.891 | 0.036  | 0.945 | -0.405 | 0.309 | 0.429  | 0.171 |
| OLIGO_11681 | AW461965      | LOC507264     | -0.021 | 0.908 | 0.067  | 0.843 | 0.284  | 0.145 | 0.401  | 0.097 |
| OLIGO_11684 | BF043911      | ZFP95         | 0.284  | 0.060 | -0.124 | 0.801 | -0.371 | 0.412 | -0.005 | 0.985 |
| OLIGO_11690 | AW461928      | MYO6          | -0.132 | 0.578 | 0.136  | 0.570 | -0.017 | 0.933 | 0.046  | 0.796 |
| OLIGO_11694 | AW461943      | POLR1A        | -0.050 | 0.748 | -0.061 | 0.809 | 0.317  | 0.128 | -0.129 | 0.337 |
| OLIGO_11696 | AW461586      | TST           | 0.141  | 0.511 | 0.107  | 0.485 | 0.037  | 0.794 | -0.025 | 0.905 |
| OLIGO_11703 | AW464026      | CANT1         | 0.512  | 0.000 | -0.478 | 0.046 | 0.192  | 0.601 | 0.452  | 0.032 |
| OLIGO_11713 | BM366786      | ACP6          | 0.031  | 0.884 | 0.158  | 0.662 | 0.331  | 0.169 | -0.323 | 0.080 |
| OLIGO_11734 | BF042092      | RPP30         | 0.209  | 0.445 | 0.337  | 0.355 | -0.020 | 0.907 | 0.058  | 0.721 |
| OLIGO_11744 | BF040899      | 5031439G07Rik | 0.453  | 0.329 | 0.501  | 0.216 | 0.027  | 0.932 | 0.690  | 0.092 |
| OLIGO_11750 | AW463388      | C14orf147     | 0.046  | 0.894 | -0.155 | 0.579 | 0.046  | 0.873 | -0.311 | 0.229 |
| OLIGO_11756 | BF045063      | Ells1         | -0.260 | 0.315 | 0.483  | 0.323 | -0.180 | 0.676 | 0.252  | 0.148 |
| OLIGO_11759 | BF040992      | LOC531863     | 0.074  | 0.584 | -0.035 | 0.887 | -0.327 | 0.200 | 0.129  | 0.410 |
| OLIGO_11761 | AW463734      | DLX1          | 0.074  | 0.777 | 0.052  | 0.846 | -0.035 | 0.861 | 0.246  | 0.135 |
| OLIGO_11772 | BF043937      | KCTD18        | 0.131  | 0.287 | 0.008  | 0.974 | -0.358 | 0.310 | -0.648 | 0.006 |
| OLIGO_11779 | BF045877      | VPS4B         | -0.361 | 0.007 | -0.363 | 0.527 | -0.067 | 0.817 | 0.297  | 0.455 |
| OLIGO_11780 | BF041846      | PPRC1         | 0.068  | 0.698 | -0.147 | 0.666 | 0.595  | 0.074 | -0.065 | 0.718 |
| OLIGO_12255 | BF043729      | MDH1          | 0.176  | 0.506 | -0.032 | 0.882 | 0.208  | 0.155 | 0.126  | 0.546 |
| OLIGO_12370 | AW464095      | ACTR3         | 0.396  | 0.080 | -0.019 | 0.953 | 0.307  | 0.337 | 0.208  | 0.374 |
| OLIGO_12524 | AW462889      | ACTG2         | -0.024 | 0.925 | -0.352 | 0.236 | -0.345 | 0.084 | 0.436  | 0.041 |
| OLIGO_12544 | BF041085      | HNRPH2        | 0.107  | 0.609 | -0.361 | 0.453 | 0.303  | 0.431 | 0.239  | 0.319 |
| OLIGO_12800 | BF042170      | IGSF4         | 0.185  | 0.369 | 0.127  | 0.471 | -0.136 | 0.532 | -0.319 | 0.133 |
| OLIGO_13214 | BM366713      | STAT3         | 0.254  | 0.192 | -0.274 | 0.390 | -0.489 | 0.174 | 0.857  | 0.001 |
| OLIGO_13215 | BM365241      | HLA-DMA       | -0.469 | 0.066 | 0.048  | 0.856 | -0.179 | 0.367 | 0.188  | 0.326 |
