# Supplementary material
Source: PubMed Central journal article supplement (PMC3053413)
Supplement: NIHMS254788-supplement-3.pdf [file NIHMS254788-supplement-3.pdf]

**Supplemental Materials Table 3.** Comparison of gene expression between developmental stages 7 d and 25 d within AI embryos (7vs25d\_AI\_E), between 7 d and 25 d within NT embryos (7vs25d\_NT\_E), between 25 d and 280 d within AI extra-embryonic samples (25vs280d\_AI\_X), and between 25 d and 280 d within NT extra-embryonic samples (25vs280d\_NT\_X) from the second set of meta-analyses.

| Oligo ID    | cDNA     | Symbol    | 7vs25d_AI_E |         | 7vs25d_NT_E |         | 25vs280d_AI_X |         | 25vs280d_NT_X |         |
|-------------|----------|-----------|-------------|---------|-------------|---------|---------------|---------|---------------|---------|
|             |          |           | Estimate    | P-value | Estimate    | P-value | Estimate      | P-value | Estimate      | P-value |
| OLIGO_11398 | AW461330 | DHRS9     | 0.8902      | 0.3776  | -1.0528     | 0.2645  | 3.6904        | 0.0000  | 3.6958        | 0.0000  |
| OLIGO_08223 | AW461331 | PHLPP     | -0.2040     | 0.6130  | 0.1130      | 0.7673  | -0.4640       | 0.2778  | -0.0954       | 0.7849  |
| OLIGO_10744 | AW461332 | PCBP2     | 0.5183      | 0.4373  | -0.4038     | 0.5175  | -0.6552       | 0.2102  | -0.7600       | 0.0971  |
| OLIGO_03617 | AW461333 | ADAM28    | -0.2306     | 0.7251  | -0.0419     | 0.9465  | 1.8905        | 0.0195  | 1.3165        | 0.0661  |
| OLIGO_06609 | AW461337 | MARVELD2  | 0.9071      | 0.0019  | -1.2339     | 0.0000  | -0.1958       | 0.3958  | -0.4195       | 0.0341  |
| OLIGO_07473 | AW461341 | MTCP1     | -0.5368     | 0.0780  | 0.6344      | 0.0255  | -0.1639       | 0.4953  | -0.1568       | 0.4529  |
| OLIGO_07882 | AW461342 | INTS12    | 0.0005      | 0.9993  | -0.5561     | 0.2699  | 0.4263        | 0.2809  | 0.0497        | 0.8856  |
| OLIGO_11379 | AW461346 | GRAMD1B   | 0.4471      | 0.3368  | -0.7162     | 0.1245  | -0.1671       | 0.6913  | 0.0287        | 0.9427  |
| OLIGO_05891 | AW461349 | ARPC5L    | 0.6955      | 0.0639  | -0.6065     | 0.0840  | -1.1229       | 0.0002  | -1.0039       | 0.0001  |
| OLIGO_11109 | AW461353 | PPP1R14B  | 1.0681      | 0.0336  | -1.4215     | 0.0026  | 0.0726        | 0.8557  | 0.2529        | 0.4697  |
| OLIGO_06132 | AW461355 | THRAP6    | -0.1050     | 0.7556  | 0.0780      | 0.8048  | -0.4005       | 0.1317  | -0.0696       | 0.7688  |
| OLIGO_02043 | AW461360 | UBE4B     | -0.2042     | 0.6360  | 0.0200      | 0.9605  | 0.7742        | 0.0224  | 0.6713        | 0.0237  |
| OLIGO_07544 | AW461361 | EML2      | 0.7202      | 0.0057  | -0.2755     | 0.2564  | -0.4123       | 0.0431  | -0.3470       | 0.0517  |
| OLIGO_08329 | AW461364 | QKI       | 0.0058      | 0.9885  | -0.4235     | 0.2611  | -0.9011       | 0.0036  | -0.4945       | 0.0673  |
| OLIGO_07591 | AW461365 | LOC408002 | 0.2282      | 0.4066  | -0.0005     | 0.9985  | -0.0549       | 0.7988  | -0.1143       | 0.5422  |
| OLIGO_06793 | AW461367 | DKK4      | 0.0168      | 0.9733  | -0.5058     | 0.3190  | 0.5715        | 0.2520  | 0.3954        | 0.3931  |
| OLIGO_07236 | AW461369 | SAR1A     | 0.1540      | 0.6089  | -0.4551     | 0.1064  | -0.0048       | 0.9837  | 0.3168        | 0.1255  |
| OLIGO_07611 | AW461371 | WBSCR22   | 0.3275      | 0.5364  | -0.1958     | 0.6927  | -0.0049       | 0.9905  | -0.2443       | 0.5019  |
| OLIGO_08347 | AW461373 | GNL3      | -0.1418     | 0.8204  | 0.1914      | 0.7445  | 0.5483        | 0.2634  | 0.0409        | 0.9248  |
| OLIGO_06850 | AW461378 | CUGBP1    | -0.0065     | 0.9785  | 0.0464      | 0.8372  | 0.0022        | 0.9908  | 0.0604        | 0.7171  |
| OLIGO_07282 | AW461380 | TA-NFKBH  | -0.3481     | 0.4348  | -0.2615     | 0.5304  | 0.3486        | 0.3184  | 0.0875        | 0.7747  |
| OLIGO_11355 | AW461385 | NOP17     | 0.2669      | 0.5256  | -0.6836     | 0.0826  | -0.2152       | 0.5138  | -0.4657       | 0.1069  |
| OLIGO_07115 | AW461388 | WEE1      | 0.0936      | 0.7882  | -0.0437     | 0.8933  | -0.2888       | 0.2986  | -0.1984       | 0.4087  |
| OLIGO_05951 | AW461392 | AMT       | 0.3981      | 0.3160  | -0.3778     | 0.3089  | 0.3493        | 0.2617  | 0.2751        | 0.3125  |
| OLIGO_07116 | AW461395 | TSPAN1    | -1.5354     | 0.0137  | 2.0090      | 0.0004  | 2.5654        | 0.0000  | 1.9322        | 0.0000  |
| OLIGO_07751 | AW461406 | FAM112B   | 1.7245      | 0.0177  | -2.0449     | 0.0072  | 0.8966        | 0.1496  | 0.2197        | 0.6912  |

|             |          |           |         |        |         |        |         |        |         |        |
|-------------|----------|-----------|---------|--------|---------|--------|---------|--------|---------|--------|
| OLIGO_11214 | AW461407 | C1orf26   | -0.1403 | 0.8157 | -0.2202 | 0.6957 | 0.6247  | 0.1898 | 0.5191  | 0.2102 |
| OLIGO_08404 | AW461409 | PPARBP    | -0.4457 | 0.3816 | 0.4296  | 0.3672 | 1.2248  | 0.0031 | 0.5394  | 0.1341 |
| OLIGO_07670 | AW461415 | SEN2      | 0.9263  | 0.0493 | -0.4735 | 0.2944 | -0.6557 | 0.0741 | -0.4598 | 0.1523 |
| OLIGO_06305 | AW461416 | LOC653199 | -1.4124 | 0.0003 | 0.8988  | 0.0130 | -0.2168 | 0.4733 | 0.1050  | 0.6917 |
| OLIGO_06370 | AW461427 | CYP17A1   | 0.3258  | 0.4596 | -0.2099 | 0.6104 | 0.7805  | 0.0242 | 0.4809  | 0.1120 |
| OLIGO_08149 | AW461431 | LOC653610 | 0.7933  | 0.1273 | -0.9267 | 0.0570 | -0.1468 | 0.7186 | -0.0851 | 0.8114 |
| OLIGO_10154 | AW461432 | TGM3      | 0.0956  | 0.8509 | -1.1983 | 0.0793 | 1.2676  | 0.1060 | 0.4287  | 0.4177 |
| OLIGO_06001 | AW461433 | UBQLN1    | -0.1043 | 0.7661 | -0.0746 | 0.8202 | -0.6015 | 0.0296 | -0.2414 | 0.3271 |
| OLIGO_06552 | AW461435 | Slc12a9   | 1.0730  | 0.0067 | -0.6822 | 0.0645 | 1.1028  | 0.0004 | 1.0249  | 0.0002 |
| OLIGO_08461 | AW461437 | SERTAD1   | 0.5812  | 0.1288 | -0.3902 | 0.2753 | 0.2209  | 0.4609 | 0.1288  | 0.6232 |
| OLIGO_06560 | AW461442 | BANF1     | 0.1313  | 0.6557 | 0.0264  | 0.9233 | -0.8646 | 0.0002 | -0.9087 | 0.0000 |
| OLIGO_06174 | AW461448 | ELOVL7    | -0.3125 | 0.5631 | 0.7365  | 0.1455 | 0.3744  | 0.3768 | 0.7249  | 0.0510 |
| OLIGO_10272 | AW461452 | MSX1      | -1.0200 | 0.0002 | 1.2993  | 0.0000 | 0.6398  | 0.0034 | 0.4361  | 0.0214 |
| OLIGO_05893 | AW461453 | POLR3A    | 0.5562  | 0.1243 | -0.3777 | 0.2641 | 0.8454  | 0.0030 | 0.7935  | 0.0015 |
| OLIGO_05997 | AW461455 | C9orf156  | 0.1734  | 0.6040 | -0.3635 | 0.2452 | 0.0595  | 0.8204 | 0.0139  | 0.9516 |
| OLIGO_06100 | AW461456 | LOC538544 | -0.0762 | 0.7939 | -0.0717 | 0.7926 | -0.1355 | 0.5536 | 0.0758  | 0.7048 |
| OLIGO_08686 | AW461457 | CXorf56   | 0.4510  | 0.1196 | -0.6367 | 0.0187 | 0.1958  | 0.3911 | -0.1613 | 0.4174 |
| OLIGO_06108 | AW461461 | PLS1      | 2.4135  | 0.0000 | -2.6702 | 0.0000 | 1.3282  | 0.0015 | 1.2763  | 0.0004 |
| OLIGO_00652 | AW461462 | WDR5      | -0.1505 | 0.7204 | -0.7133 | 0.0718 | 0.7003  | 0.0340 | 0.8732  | 0.0026 |
| OLIGO_06114 | AW461469 | SERPING1  | -0.6124 | 0.0890 | 0.6907  | 0.0416 | 0.6497  | 0.0217 | 0.6536  | 0.0090 |
| OLIGO_03623 | AW461471 | JDP2      | 0.0902  | 0.7969 | 0.0506  | 0.8774 | 0.2653  | 0.3345 | 0.1828  | 0.4472 |
| OLIGO_10235 | AW461476 | TARSL1    | 0.1565  | 0.6496 | -0.2473 | 0.4424 | -0.3459 | 0.1972 | -0.2982 | 0.2109 |
| OLIGO_10285 | AW461477 | IMPA2     | -0.3078 | 0.4993 | 1.4753  | 0.0005 | -0.7583 | 0.0369 | -0.6223 | 0.0467 |
| OLIGO_05945 | AW461479 | RNF111    | 0.0400  | 0.8829 | -0.3372 | 0.1825 | 0.1146  | 0.5942 | 0.0161  | 0.9320 |
| OLIGO_03624 | AW461481 | FLJ20273  | 1.6736  | 0.0001 | -1.5112 | 0.0002 | 1.2742  | 0.0002 | 0.9991  | 0.0008 |
| OLIGO_07252 | AW461482 | LRP10     | -0.0728 | 0.7384 | -0.1570 | 0.4413 | -0.1543 | 0.3665 | -0.1475 | 0.3240 |
| OLIGO_10968 | AW461494 | PGEA1     | 0.0348  | 0.9474 | 0.3194  | 0.5174 | -0.3120 | 0.4506 | -0.1782 | 0.6224 |
| OLIGO_06141 | AW461498 | PLA2G7    | 0.0537  | 0.8789 | 0.8129  | 0.0138 | 0.3831  | 0.1712 | 0.4375  | 0.0755 |
| OLIGO_06437 | AW461501 | TNFAIP6   | -0.5503 | 0.2623 | 0.4488  | 0.3263 | 1.6214  | 0.0000 | 1.3461  | 0.0001 |
| OLIGO_11507 | AW461502 | NAGA      | 0.7918  | 0.0921 | -1.2272 | 0.0256 | 0.1367  | 0.6957 | 0.0164  | 0.9594 |
| OLIGO_03625 | AW461503 | TRAPPC4   | -0.5271 | 0.1771 | 0.2193  | 0.5401 | 0.2923  | 0.3894 | 0.1035  | 0.7373 |
| OLIGO_09208 | AW461507 | TOR2A     | -0.2523 | 0.6875 | 0.1925  | 0.7501 | 1.5268  | 0.0309 | 1.3484  | 0.0466 |
| OLIGO_06198 | AW461508 | TWISTNB   | 0.3854  | 0.3847 | -0.2543 | 0.5387 | 1.3942  | 0.0705 | 0.9050  | 0.1767 |
| OLIGO_11224 | AW461512 | H3F3A     | -0.7845 | 0.0650 | -0.0318 | 0.9358 | -0.9980 | 0.0030 | -0.5533 | 0.0583 |

|             |          |           |         |        |         |        |         |        |         |        |
|-------------|----------|-----------|---------|--------|---------|--------|---------|--------|---------|--------|
| OLIGO_09269 | AW461513 | MGC137708 | -0.5607 | 0.0224 | 0.5867  | 0.0102 | -0.2065 | 0.2873 | -0.0943 | 0.5748 |
| OLIGO_08334 | AW461514 | ANPEP     | -0.6312 | 0.1354 | 0.3023  | 0.4281 | 0.7620  | 0.0792 | 0.9725  | 0.0453 |
| OLIGO_03627 | AW461516 | GPBAR1    | -0.6171 | 0.4026 | 0.5639  | 0.4138 | 0.9906  | 0.1565 | 0.5475  | 0.3789 |
| OLIGO_05989 | AW461524 | OAT       | 1.6532  | 0.0144 | -1.4149 | 0.0250 | -0.6497 | 0.2189 | -0.2308 | 0.6188 |
| OLIGO_10306 | AW461532 | KIAA0196  | 0.8885  | 0.0043 | -0.8124 | 0.0053 | -0.2907 | 0.2316 | -0.1286 | 0.5454 |
| OLIGO_06168 | AW461536 | ZCCHC9    | -0.0141 | 0.9606 | -0.1181 | 0.6572 | -0.3486 | 0.1255 | -0.2806 | 0.1545 |
| OLIGO_06412 | AW461538 | MRPL33    | 0.0335  | 0.9463 | -0.2807 | 0.5460 | -0.1686 | 0.6651 | -0.1382 | 0.6852 |
| OLIGO_05931 | AW461544 | ASMTL     | -0.4001 | 0.2838 | -0.1929 | 0.5849 | 0.5375  | 0.0667 | 0.1346  | 0.6026 |
| OLIGO_00434 | AW461545 | SSBP2     | -1.5008 | 0.0008 | 2.0396  | 0.0000 | -0.4218 | 0.2316 | -0.3622 | 0.2398 |
| OLIGO_03628 | AW461549 | ANK3      | -0.0217 | 0.9752 | -0.3826 | 0.5760 | 0.2754  | 0.6784 | -0.0735 | 0.9090 |
| OLIGO_06418 | AW461550 | ANXA4     | 0.2130  | 0.7247 | 0.0972  | 0.8636 | -0.0217 | 0.9634 | 0.3949  | 0.3433 |
| OLIGO_07953 | AW461551 | Map4k4    | -1.3122 | 0.0016 | 2.1015  | 0.0000 | -1.3920 | 0.0000 | -0.9235 | 0.0015 |
| OLIGO_06578 | AW461555 | C3orf28   | -0.1756 | 0.7300 | -0.2149 | 0.6536 | 0.2366  | 0.5526 | 0.0889  | 0.7988 |
| OLIGO_06386 | AW461557 | C18orf10  | -1.4272 | 0.0004 | 1.9021  | 0.0000 | -0.4603 | 0.1454 | -0.3664 | 0.1804 |
| OLIGO_01464 | AW461558 | CTNNBIP1  | -0.3296 | 0.3314 | 0.0378  | 0.9052 | 0.7091  | 0.0084 | 0.7833  | 0.0008 |
| OLIGO_06424 | AW461559 | PLOD2     | -0.6079 | 0.4809 | -1.3017 | 0.0607 | 0.5814  | 0.2182 | 0.1343  | 0.7457 |
| OLIGO_09737 | AW461561 | COMMD2    | 0.1766  | 0.5925 | -0.5117 | 0.0975 | 0.6307  | 0.0157 | 0.6722  | 0.0040 |
| OLIGO_06615 | AW461564 | DAD1      | -0.0763 | 0.8401 | -0.4008 | 0.2987 | 0.0240  | 0.9428 | -0.6391 | 0.1502 |
| OLIGO_06002 | AW461566 | NET1      | 0.5039  | 0.2816 | -0.7491 | 0.0873 | 1.2182  | 0.0010 | 1.4881  | 0.0000 |
| OLIGO_00499 | AW461571 | PPAP2B    | -0.8739 | 0.0217 | 0.4652  | 0.1895 | 1.4357  | 0.0000 | 1.0009  | 0.0001 |
| OLIGO_11543 | AW461572 | CEBPB     | 0.5897  | 0.2075 | -0.9443 | 0.0312 | 0.5805  | 0.1144 | 0.6855  | 0.0357 |
| OLIGO_06017 | AW461578 | PDZK1     | -0.5191 | 0.3245 | 0.2793  | 0.5612 | 1.4756  | 0.0003 | 1.1495  | 0.0015 |
| OLIGO_08794 | AW461580 | LOC509011 | 0.0449  | 0.9160 | 0.0307  | 0.9389 | -0.2357 | 0.4805 | -0.2058 | 0.4817 |
| OLIGO_06390 | AW461581 | APIG2     | 0.1460  | 0.5563 | 0.5687  | 0.0143 | 0.2108  | 0.2869 | -0.0150 | 0.9300 |
| OLIGO_06248 | AW461583 | TMED10    | 0.5542  | 0.2965 | -0.1733 | 0.7270 | -0.2547 | 0.5411 | -0.1316 | 0.7185 |
| OLIGO_09454 | AW461584 | DYNLL1    | -0.1603 | 0.6758 | 0.2295  | 0.5220 | -0.0552 | 0.8541 | -0.0480 | 0.8552 |
| OLIGO_09908 | AW461585 | EHMT2     | 0.3453  | 0.3833 | 0.1091  | 0.7696 | 0.2208  | 0.4767 | -0.0368 | 0.8922 |
| OLIGO_11696 | AW461586 | TST       | -0.6348 | 0.0158 | 0.7971  | 0.0011 | -0.3849 | 0.0656 | -0.2093 | 0.2399 |
| OLIGO_10366 | AW461589 | NUTF2     | 0.0100  | 0.9944 | 0.3895  | 0.7824 | -2.9904 | 0.0500 | 0.3618  | 0.8140 |
| OLIGO_06120 | AW461591 | HSF1      | -0.4443 | 0.1472 | 0.8740  | 0.0024 | 0.2718  | 0.2576 | 0.1301  | 0.5357 |
| OLIGO_09960 | AW461596 | FLJ13611  | 0.6132  | 0.4145 | -0.6496 | 0.3553 | 0.2337  | 0.6913 | -0.0338 | 0.9477 |
| OLIGO_05957 | AW461599 | USP21     | -0.5701 | 0.1377 | 0.3415  | 0.3442 | 0.0848  | 0.7801 | 0.0819  | 0.7555 |
| OLIGO_06133 | AW461601 | NDUFA8    | 0.4804  | 0.1130 | -0.5298 | 0.0611 | -0.2833 | 0.2362 | -0.5335 | 0.0116 |
| OLIGO_02455 | AW461602 | G6PD      | 0.6092  | 0.0907 | -0.2589 | 0.4414 | -0.5276 | 0.0617 | -0.4530 | 0.0668 |

|             |          |           |         |        |         |        |         |        |         |        |
|-------------|----------|-----------|---------|--------|---------|--------|---------|--------|---------|--------|
| OLIGO_06404 | AW461605 | ALKBH3    | 0.0278  | 0.9443 | -0.4269 | 0.2524 | -0.2069 | 0.5080 | -0.0931 | 0.7363 |
| OLIGO_10021 | AW461607 | PXMP3     | -0.1954 | 0.6653 | 0.1641  | 0.6977 | -0.3305 | 0.3508 | -0.8063 | 0.0096 |
| OLIGO_10248 | AW461608 | CCBL1     | 0.3244  | 0.6156 | -0.4915 | 0.4161 | -0.3948 | 0.4356 | -0.0172 | 0.9691 |
| OLIGO_10868 | AW461611 | MYL6      | 0.2634  | 0.3870 | -0.1047 | 0.7113 | -0.6595 | 0.0066 | -0.7493 | 0.0004 |
| OLIGO_10254 | AW461613 | EAF1      | -0.3617 | 0.5249 | 0.6069  | 0.2541 | -0.5890 | 0.1867 | -0.4010 | 0.3043 |
| OLIGO_03630 | AW461617 | AQP11     | 1.7544  | 0.0143 | -1.8044 | 0.0071 | 2.3150  | 0.0000 | 2.3943  | 0.0000 |
| OLIGO_09620 | AW461620 | HSD11B1   | 0.0011  | 0.9976 | 0.2252  | 0.5031 | 0.4178  | 0.1416 | 0.3493  | 0.1571 |
| OLIGO_10141 | AW461623 | UBA2      | 0.4125  | 0.3279 | -0.8499 | 0.0689 | -0.6366 | 0.1463 | -0.4969 | 0.2258 |
| OLIGO_06146 | AW461625 | B3GAT3    | -0.0834 | 0.7524 | 0.4487  | 0.0690 | -0.3206 | 0.1294 | -0.1587 | 0.3840 |
| OLIGO_06217 | AW461627 | USP14     | 0.4638  | 0.1991 | -0.9773 | 0.0303 | -0.8424 | 0.0721 | -0.5487 | 0.1783 |
| OLIGO_09096 | AW461632 | EMX2      | -1.4203 | 0.0015 | 1.7983  | 0.0000 | -0.1104 | 0.7520 | 0.0568  | 0.8527 |
| OLIGO_10994 | AW461634 | EFHA1     | 0.1818  | 0.5142 | -0.6583 | 0.0111 | 0.1052  | 0.6351 | 0.0002  | 0.9992 |
| OLIGO_06067 | AW461644 | SERINC3   | 0.4032  | 0.2676 | -0.1531 | 0.6520 | -0.4507 | 0.1151 | -0.2989 | 0.2314 |
| OLIGO_03631 | AW461651 | EXOC2     | -0.0581 | 0.8299 | 0.0588  | 0.8163 | 0.3927  | 0.0647 | 0.2152  | 0.2469 |
| OLIGO_05976 | AW461652 | SMPDL3B   | -0.7996 | 0.3161 | 0.2269  | 0.7403 | 1.1561  | 0.0362 | 0.6125  | 0.2042 |
| OLIGO_08253 | AW461656 | SMTNL2    | -0.3839 | 0.5065 | -0.2046 | 0.7073 | -0.7281 | 0.2082 | -0.5393 | 0.3153 |
| OLIGO_03632 | AW461661 | OBSL1     | -0.9622 | 0.0167 | 0.1840  | 0.6131 | 0.2140  | 0.4786 | 0.1880  | 0.4812 |
| OLIGO_06266 | AW461664 | WBSCR27   | 0.6042  | 0.1041 | -0.9137 | 0.0088 | 0.9715  | 0.0009 | 0.7218  | 0.0048 |
| OLIGO_06982 | AW461667 | RBX1      | -0.3425 | 0.1327 | 0.1995  | 0.3472 | -0.4855 | 0.0070 | -0.1821 | 0.2444 |
| OLIGO_10299 | AW461668 | DOCK8     | 0.6812  | 0.1786 | -0.5214 | 0.2883 | 0.5917  | 0.1231 | 0.7344  | 0.0286 |
| OLIGO_11089 | AW461672 | FASTK     | 0.1601  | 0.5169 | -0.4823 | 0.0373 | -0.3253 | 0.0940 | -0.3952 | 0.0215 |
| OLIGO_06520 | AW461676 | KCTD11    | 0.2707  | 0.6097 | -0.3750 | 0.4708 | -0.4688 | 0.3649 | -0.1556 | 0.7352 |
| OLIGO_06456 | AW461682 | SLC4A11   | 0.9871  | 0.0024 | -0.2317 | 0.4402 | -0.1004 | 0.6950 | -0.0797 | 0.7194 |
| OLIGO_03633 | AW461686 | TSG101    | -0.0547 | 0.8989 | -0.0477 | 0.9057 | 0.0439  | 0.8973 | -0.0485 | 0.8698 |
| OLIGO_06320 | AW461687 | CDC34     | -0.1392 | 0.4974 | 0.3055  | 0.1111 | -0.0322 | 0.8423 | -0.1254 | 0.3739 |
| OLIGO_06540 | AW461688 | C7orf11   | -0.4007 | 0.1892 | -0.0131 | 0.9632 | -0.2783 | 0.2475 | -0.1637 | 0.4355 |
| OLIGO_09493 | AW461689 | ZNF436    | 0.2497  | 0.5758 | 0.0830  | 0.8481 | -0.0228 | 0.9567 | 0.0361  | 0.9294 |
| OLIGO_06463 | AW461692 | SNRPD1    | 0.0392  | 0.9330 | 0.0484  | 0.9138 | -0.8453 | 0.0962 | -0.8932 | 0.0888 |
| OLIGO_06635 | AW461693 | LOC618151 | 0.1777  | 0.7796 | -0.7784 | 0.1903 | 0.2528  | 0.6117 | -0.2854 | 0.5127 |
| OLIGO_06502 | AW461694 | IRF6      | 1.1631  | 0.2843 | -2.3334 | 0.0384 | 2.8578  | 0.0147 | 2.1914  | 0.0426 |
| OLIGO_10583 | AW461695 | SNORA24   | 0.2526  | 0.7024 | -0.0389 | 0.9498 | -0.1069 | 0.8368 | -0.0885 | 0.8469 |
| OLIGO_03634 | AW461699 | ABCC10    | -0.0366 | 0.9177 | -0.3111 | 0.3535 | 0.0004  | 0.9989 | -0.0305 | 0.8999 |
| OLIGO_06371 | AW461704 | ZC3HAV1   | -0.3021 | 0.4471 | 0.6266  | 0.0923 | -0.3536 | 0.2565 | 0.0023  | 0.9932 |
| OLIGO_08344 | AW461706 | SAP30     | -0.4021 | 0.4490 | 0.8475  | 0.0881 | -0.8611 | 0.0485 | -1.2855 | 0.0008 |

|             |          |           |         |        |         |        |         |        |         |        |
|-------------|----------|-----------|---------|--------|---------|--------|---------|--------|---------|--------|
| OLIGO_08345 | AW461709 | FLJ20647  | -1.1770 | 0.0072 | 2.0658  | 0.0000 | -1.1651 | 0.0009 | -1.3401 | 0.0000 |
| OLIGO_06349 | AW461715 | PEBP1     | 0.0318  | 0.9470 | -0.2468 | 0.5827 | -1.8041 | 0.0000 | -1.6414 | 0.0000 |
| OLIGO_03635 | AW461717 | CKMT1B    | 0.5571  | 0.2910 | -0.6196 | 0.2291 | 0.5842  | 0.2345 | 0.3312  | 0.4694 |
| OLIGO_10749 | AW461719 | LSMD1     | -0.7317 | 0.1876 | -0.0240 | 0.9591 | -0.0679 | 0.8742 | 0.0044  | 0.9913 |
| OLIGO_06306 | AW461722 | ALPK3     | -0.2063 | 0.7992 | -0.0495 | 0.9469 | 2.1045  | 0.0003 | 1.9530  | 0.0001 |
| OLIGO_10676 | AW461724 | GM2A      | 1.7006  | 0.0019 | -1.8684 | 0.0003 | 0.2483  | 0.5635 | 0.9414  | 0.0156 |
| OLIGO_11260 | AW461725 | ABHD4     | -0.4885 | 0.1831 | 0.5452  | 0.1106 | -0.0068 | 0.9814 | -0.1779 | 0.4802 |
| OLIGO_06604 | AW461727 | HOKK1     | -0.8519 | 0.1436 | 0.8504  | 0.1451 | 1.6000  | 0.0000 | 1.3576  | 0.0001 |
| OLIGO_08349 | AW461734 | Usp12     | -0.1534 | 0.6432 | 0.0082  | 0.9792 | 0.2681  | 0.3814 | 0.1887  | 0.5115 |
| OLIGO_06273 | AW461737 | IER5      | -0.2362 | 0.3943 | 0.7518  | 0.0038 | -0.1458 | 0.5049 | 0.0720  | 0.7055 |
| OLIGO_06297 | AW461753 | PGM2L1    | 0.3564  | 0.3113 | 0.1537  | 0.6402 | 0.8102  | 0.0035 | 0.7304  | 0.0026 |
| OLIGO_08352 | AW461754 | LOC505940 | -1.6014 | 0.0003 | 2.0501  | 0.0000 | 0.0501  | 0.8847 | -0.1784 | 0.5540 |
| OLIGO_03640 | AW461756 | ENTPD8    | 0.3014  | 0.5313 | -0.1919 | 0.6773 | 0.4772  | 0.3002 | 0.2553  | 0.5469 |
| OLIGO_08655 | AW461759 | SIGIRR    | 1.8328  | 0.0001 | -1.9192 | 0.0000 | 1.1177  | 0.0021 | 0.5550  | 0.0745 |
| OLIGO_06530 | AW461766 | LLGL2     | -0.2195 | 0.7395 | 0.2386  | 0.6992 | 0.1878  | 0.7167 | 0.0217  | 0.9619 |
| OLIGO_11358 | AW461769 | CBR1      | 0.2334  | 0.5498 | -0.0236 | 0.9483 | -0.1062 | 0.7301 | 0.1398  | 0.6106 |
| OLIGO_06653 | AW461781 | MAN2A2    | 0.3768  | 0.1822 | 0.0844  | 0.7492 | 0.6809  | 0.0022 | 0.4047  | 0.0371 |
| OLIGO_10437 | AW461783 | PDPN      | 2.5297  | 0.0000 | -2.5631 | 0.0000 | -1.8071 | 0.0001 | -1.2988 | 0.0012 |
| OLIGO_07199 | AW461790 | UBE2R2    | 0.2768  | 0.4268 | -0.0989 | 0.7614 | -0.6123 | 0.0256 | -0.4077 | 0.0904 |
| OLIGO_06598 | AW461795 | MCEE      | 0.0228  | 0.9414 | -0.6555 | 0.0209 | 0.7112  | 0.0036 | 0.0564  | 0.7906 |
| OLIGO_10086 | AW461799 | STK25     | -0.2371 | 0.5973 | -0.6411 | 0.1178 | 0.9980  | 0.0037 | 0.5258  | 0.0799 |
| OLIGO_06379 | AW461802 | P8        | 1.9152  | 0.0002 | -1.6090 | 0.0010 | 0.4715  | 0.2428 | 0.3679  | 0.2977 |
| OLIGO_03642 | AW461803 | NCOA6     | 0.5603  | 0.0551 | -0.3500 | 0.1996 | -0.0328 | 0.8858 | -0.0483 | 0.8090 |
| OLIGO_06621 | AW461804 | AI427138  | 0.4162  | 0.6179 | -0.9108 | 0.2808 | 3.0208  | 0.0350 | 2.9224  | 0.0696 |
| OLIGO_03643 | AW461808 | TP53RK    | 0.4877  | 0.0540 | -0.7749 | 0.0011 | 0.1708  | 0.3884 | 0.0284  | 0.8699 |
| OLIGO_10466 | AW461813 | RPL31     | 0.2293  | 0.5667 | 0.0782  | 0.8381 | 0.0274  | 0.9313 | 0.2614  | 0.3463 |
| OLIGO_06553 | AW461818 | CCL14     | 0.3434  | 0.5876 | -0.2902 | 0.6366 | 1.4188  | 0.0358 | 1.1218  | 0.0761 |
| OLIGO_08228 | AW461823 | EMG1      | 1.0677  | 0.0313 | -1.2277 | 0.0154 | 0.2012  | 0.6249 | 0.0884  | 0.8216 |
| OLIGO_07826 | AW461824 | VPS29     | 0.6349  | 0.0666 | -0.6704 | 0.0384 | 0.1508  | 0.5807 | 0.0097  | 0.9674 |
| OLIGO_03645 | AW461828 | ANKH      | 0.3448  | 0.3872 | 0.6272  | 0.1010 | 0.3541  | 0.2586 | 0.1908  | 0.4843 |
| OLIGO_08355 | AW461830 | GPX1      | 0.2837  | 0.6086 | -0.1008 | 0.8457 | 0.1582  | 0.7161 | 0.1534  | 0.6873 |
| OLIGO_10579 | AW461832 | RPL18     | -0.1525 | 0.7472 | 0.2923  | 0.5088 | -1.1085 | 0.0029 | -0.9932 | 0.0023 |
| OLIGO_07040 | AW461836 | RNF5      | 0.6836  | 0.0400 | -0.3943 | 0.2046 | -0.6380 | 0.0145 | -0.4211 | 0.0650 |
| OLIGO_06488 | AW461838 | WNT6      | 1.8361  | 0.0001 | -2.2115 | 0.0000 | 0.0345  | 0.9236 | 0.3066  | 0.3208 |

|             |          |             |         |        |         |        |         |        |         |        |
|-------------|----------|-------------|---------|--------|---------|--------|---------|--------|---------|--------|
| OLIGO_08356 | AW461844 | CC2D1B      | 1.0094  | 0.1237 | -0.5907 | 0.3349 | -0.0551 | 0.9145 | 0.0259  | 0.9540 |
| OLIGO_03646 | AW461846 | TNKS1BP1    | -0.1409 | 0.7680 | 0.2366  | 0.5997 | 1.1990  | 0.0009 | 0.4771  | 0.1283 |
| OLIGO_03647 | AW461848 | RP1-112K5.2 | 0.1686  | 0.6118 | -0.1415 | 0.6451 | -0.0763 | 0.7728 | -0.0970 | 0.6694 |
| OLIGO_06534 | AW461852 | SLC27A2     | -0.1983 | 0.9115 | -1.2315 | 0.5377 | 2.0055  | 0.0497 | 1.4428  | 0.1110 |
| OLIGO_02768 | AW461859 | UBE2R2      | 0.6183  | 0.1128 | -0.8337 | 0.0224 | -0.6668 | 0.0293 | -0.3496 | 0.1910 |
| OLIGO_08079 | AW461861 | ABHD11      | 0.6259  | 0.3562 | -0.9294 | 0.1694 | -0.1336 | 0.8324 | 0.0398  | 0.9480 |
| OLIGO_03649 | AW461867 | TMEM86A     | 1.3256  | 0.0197 | -1.6147 | 0.0031 | -0.4200 | 0.3423 | -0.2004 | 0.6046 |
| OLIGO_06723 | AW461872 | MSR1        | -0.0926 | 0.8842 | -0.9433 | 0.1146 | 1.9002  | 0.0004 | 0.9772  | 0.0279 |
| OLIGO_06910 | AW461877 | CACYBP      | 0.3602  | 0.3584 | -0.5129 | 0.1622 | -0.5062 | 0.1000 | -0.1412 | 0.5996 |
| OLIGO_03650 | AW461878 | LIFR        | -0.7241 | 0.3481 | 1.6122  | 0.0277 | 2.8192  | 0.0000 | 2.5930  | 0.0000 |
| OLIGO_03651 | AW461879 | SPTBN2      | 0.2744  | 0.5642 | 0.2619  | 0.5548 | 0.1671  | 0.6482 | 0.1877  | 0.5584 |
| OLIGO_06732 | AW461882 | ATF7IP      | 0.9451  | 0.0018 | -0.4095 | 0.1462 | 0.3007  | 0.2060 | 0.4732  | 0.0225 |
| OLIGO_11008 | AW461884 | ANKRD43     | 1.2208  | 0.0010 | -0.4544 | 0.1903 | -0.5114 | 0.0843 | -0.5072 | 0.0466 |
| OLIGO_03653 | AW461893 | HAND2       | -0.4735 | 0.4132 | 1.2652  | 0.0193 | 1.2121  | 0.0084 | 1.5468  | 0.0001 |
| OLIGO_08362 | AW461896 | TAOK3       | 1.2543  | 0.0008 | -1.3070 | 0.0002 | 0.7805  | 0.0086 | 0.5675  | 0.0269 |
| OLIGO_03654 | AW461898 | PPM1J       | 0.2208  | 0.7754 | 0.2256  | 0.7657 | -0.3082 | 0.6788 | 0.1999  | 0.7822 |
| OLIGO_06697 | AW461900 | THYN1       | -0.1150 | 0.7441 | -0.7311 | 0.0260 | 0.8516  | 0.0025 | 0.5887  | 0.0154 |
| OLIGO_03655 | AW461905 | CFD         | 0.2156  | 0.7282 | -0.2624 | 0.6643 | 0.9898  | 0.1147 | 0.6535  | 0.2646 |
| OLIGO_00954 | AW461910 | SNX1        | 0.7350  | 0.0160 | -0.7783 | 0.0061 | 0.2190  | 0.3643 | 0.2452  | 0.2402 |
| OLIGO_11362 | AW461911 | SBF1        | -0.2692 | 0.6046 | -0.1000 | 0.8374 | 0.1710  | 0.7035 | 0.0813  | 0.8461 |
| OLIGO_10066 | AW461914 | SDC1        | 0.4183  | 0.2827 | 0.9044  | 0.0137 | -0.9801 | 0.0015 | -0.5045 | 0.0599 |
| OLIGO_03656 | AW461921 | ECT2        | 0.1664  | 0.7368 | 0.0875  | 0.8539 | 0.6058  | 0.2195 | 0.3335  | 0.4537 |
| OLIGO_00726 | AW461927 | SMARCE1     | -0.7092 | 0.1382 | 0.0486  | 0.9083 | -0.2949 | 0.4747 | -0.5116 | 0.2297 |
| OLIGO_11690 | AW461928 | MYO6        | -0.6191 | 0.0657 | 0.8926  | 0.0047 | 0.0595  | 0.8214 | -0.0873 | 0.7077 |
| OLIGO_10029 | AW461930 | RNF8        | 0.5939  | 0.1038 | -0.8989 | 0.0087 | -0.2115 | 0.4592 | -0.2138 | 0.3927 |
| OLIGO_03657 | AW461931 | IQGAP3      | 0.3525  | 0.4050 | -0.1598 | 0.6808 | -0.4366 | 0.3120 | -0.5195 | 0.2721 |
| OLIGO_06856 | AW461932 | PHLDA1      | -1.5427 | 0.0001 | 1.5223  | 0.0000 | -1.0455 | 0.0008 | -0.6596 | 0.0138 |
| OLIGO_06742 | AW461934 | TPARL       | 0.2957  | 0.2753 | -0.6425 | 0.0111 | -0.6652 | 0.0021 | -0.6531 | 0.0005 |
| OLIGO_03659 | AW461939 | ESPN        | -0.8994 | 0.1283 | 0.7226  | 0.1912 | 1.5763  | 0.0007 | 0.9126  | 0.0247 |
| OLIGO_11694 | AW461943 | POLR1A      | -0.2239 | 0.3780 | 0.2072  | 0.3832 | -0.3958 | 0.0472 | -0.3860 | 0.0272 |
| OLIGO_06819 | AW461946 | FLJ20487    | -0.1248 | 0.7258 | -0.3299 | 0.3162 | 0.4926  | 0.0780 | 0.0511  | 0.8332 |
| OLIGO_11228 | AW461948 | LTBP4       | -1.4852 | 0.0001 | 1.5893  | 0.0000 | 0.0242  | 0.9343 | -0.1474 | 0.5664 |
| OLIGO_06885 | AW461949 | SF3B3       | -0.0795 | 0.7993 | 0.1137  | 0.7068 | -0.4432 | 0.1550 | -0.4227 | 0.1611 |
| OLIGO_11681 | AW461965 | LOC507264   | -0.8399 | 0.0369 | 0.6920  | 0.0659 | -0.4322 | 0.1701 | -0.2946 | 0.2851 |

|             |          |           |         |        |         |        |         |        |         |        |
|-------------|----------|-----------|---------|--------|---------|--------|---------|--------|---------|--------|
| OLIGO_08469 | AW461969 | DPH2      | -0.2714 | 0.3324 | 0.1209  | 0.6406 | 0.5936  | 0.0080 | 0.5830  | 0.0025 |
| OLIGO_03660 | AW461976 | NDUFV1    | 0.2598  | 0.5286 | -0.3701 | 0.3327 | 0.1610  | 0.6169 | -0.1562 | 0.5782 |
| OLIGO_01751 | AW461980 | LOC649124 | 0.8590  | 0.0030 | -1.3025 | 0.0000 | -0.9489 | 0.0000 | -0.7515 | 0.0002 |
| OLIGO_06775 | AW461984 | PAK6      | 0.5990  | 0.2029 | -0.1519 | 0.7296 | 0.2226  | 0.5456 | 0.1540  | 0.6329 |
| OLIGO_08357 | AW461987 | PRL       | -1.3945 | 0.2161 | 0.8779  | 0.4056 | 5.0507  | 0.0000 | 4.5115  | 0.0000 |
| OLIGO_08375 | AW461989 | DNAJA4    | 0.4654  | 0.4867 | -0.0768 | 0.9013 | -0.1481 | 0.7739 | -0.1669 | 0.7115 |
| OLIGO_07480 | AW461991 | C1orf144  | 1.5760  | 0.0000 | -0.9317 | 0.0045 | 0.1428  | 0.6033 | 0.4459  | 0.0637 |
| OLIGO_11364 | AW461992 | TACSTD1   | 0.7579  | 0.1632 | -1.2717 | 0.0131 | 0.7877  | 0.0645 | 0.7502  | 0.0444 |
| OLIGO_08376 | AW461995 | SH2D3C    | -0.2187 | 0.7066 | 0.4237  | 0.4407 | 0.7473  | 0.0947 | 0.8624  | 0.0278 |
| OLIGO_10651 | AW461997 | ATP5G2    | 0.1746  | 0.8225 | -1.1402 | 0.1179 | -1.4123 | 0.0210 | -1.3786 | 0.0101 |
| OLIGO_08372 | AW461998 | CSRPI     | 0.0126  | 0.9797 | -0.1911 | 0.6839 | 0.0043  | 0.9899 | 0.0641  | 0.8299 |
| OLIGO_06531 | AW461999 | HSPC023   | -0.6624 | 0.2045 | 0.3942  | 0.4192 | 0.4071  | 0.3196 | -0.0921 | 0.7968 |
| OLIGO_05719 | AW462010 | ANKRA2    | -0.4639 | 0.2576 | 0.3514  | 0.3590 | 0.3744  | 0.2438 | 0.1116  | 0.6912 |
| OLIGO_03662 | AW462014 | PREP      | -0.1186 | 0.7495 | 0.4955  | 0.1543 | 0.5839  | 0.0454 | 0.6461  | 0.0115 |
| OLIGO_03663 | AW462016 | ZNF410    | 0.3413  | 0.3909 | 0.1461  | 0.6922 | 0.2347  | 0.5091 | 0.2832  | 0.4229 |
| OLIGO_08381 | AW462018 | S100A6    | -0.2285 | 0.6812 | -0.2666 | 0.6259 | 0.2451  | 0.6419 | 0.1482  | 0.7718 |
| OLIGO_06670 | AW462019 | WDR8      | -0.4461 | 0.2232 | 0.5651  | 0.1445 | 0.1984  | 0.5236 | -0.2561 | 0.4434 |
| OLIGO_08382 | AW462021 | LOC512313 | 0.2149  | 0.6183 | 0.1994  | 0.6207 | 1.6925  | 0.0000 | 1.6547  | 0.0000 |
| OLIGO_08383 | AW462027 | SLC39A11  | 0.3973  | 0.1273 | -0.1682 | 0.4866 | -0.1192 | 0.5632 | -0.4562 | 0.0110 |
| OLIGO_11113 | AW462031 | KIAA0804  | -0.6252 | 0.3633 | 0.2795  | 0.6587 | 0.6904  | 0.1822 | 0.2003  | 0.6581 |
| OLIGO_08385 | AW462032 | LOC508291 | -0.0653 | 0.9165 | -0.2680 | 0.6574 | 0.6238  | 0.2916 | 0.4181  | 0.4491 |
| OLIGO_08386 | AW462034 | ACP2      | -0.2025 | 0.3389 | 0.3828  | 0.0518 | 0.4480  | 0.0080 | 0.1674  | 0.2494 |
| OLIGO_03664 | AW462037 | NDRG3     | -0.1507 | 0.7135 | 0.4220  | 0.3003 | 0.2415  | 0.5069 | 0.5366  | 0.1851 |
| OLIGO_08540 | AW462038 | PLAU      | -0.1969 | 0.5769 | 0.1598  | 0.6275 | -0.0735 | 0.7914 | -0.0097 | 0.9681 |
| OLIGO_06646 | AW462040 | CALR      | -0.5643 | 0.2554 | 0.3780  | 0.4151 | 0.7513  | 0.0537 | 0.1214  | 0.7212 |
| OLIGO_03665 | AW462041 | C16orf24  | 0.0893  | 0.7683 | 0.4171  | 0.1372 | -0.3346 | 0.1660 | -0.2072 | 0.3174 |
| OLIGO_10470 | AW462043 | MRPL52    | -0.3777 | 0.1732 | 0.3242  | 0.2106 | -0.6213 | 0.0046 | -0.0658 | 0.7293 |
| OLIGO_06526 | AW462048 | GORASP2   | 0.0433  | 0.8743 | -0.1304 | 0.6217 | 0.0771  | 0.7472 | 0.0213  | 0.9237 |
| OLIGO_10505 | AW462057 | ARF4      | 0.1920  | 0.5988 | -0.2713 | 0.4427 | 0.0710  | 0.8187 | 0.1806  | 0.5539 |
| OLIGO_07442 | AW462060 | MED31     | 0.1014  | 0.6693 | 0.0143  | 0.9483 | 0.0711  | 0.7059 | 0.0336  | 0.8367 |
| OLIGO_10768 | AW462064 | LOC493778 | -1.0643 | 0.0246 | 1.0774  | 0.0148 | -0.8204 | 0.0280 | -0.7382 | 0.0233 |
| OLIGO_09977 | AW462065 | LOC516545 | -0.6328 | 0.1118 | 0.2818  | 0.4480 | 1.1521  | 0.0003 | 0.7183  | 0.0088 |
| OLIGO_08587 | AW462067 | COMMD9    | 0.0585  | 0.8997 | 0.2847  | 0.5119 | 0.1374  | 0.7057 | 0.0798  | 0.8028 |
| OLIGO_03666 | AW462068 | KIAA1026  | 0.5121  | 0.4330 | -0.3421 | 0.5861 | 0.5029  | 0.4083 | 0.2946  | 0.6108 |

|             |          |          |         |        |         |        |         |        |         |        |
|-------------|----------|----------|---------|--------|---------|--------|---------|--------|---------|--------|
| OLIGO_07482 | AW462072 | RNF130   | 0.3315  | 0.3412 | 0.6754  | 0.0385 | -0.6814 | 0.0132 | -0.0079 | 0.9741 |
| OLIGO_06902 | AW462073 | PSMC1    | -0.0781 | 0.8372 | -0.2535 | 0.4760 | -0.1261 | 0.6721 | -0.5751 | 0.0279 |
| OLIGO_08037 | AW462074 | RUFY3    | 0.2149  | 0.5864 | -0.5384 | 0.2001 | 0.5025  | 0.2285 | 0.5488  | 0.2088 |
| OLIGO_01613 | AW462081 | EMP1     | -0.9645 | 0.0842 | 0.7086  | 0.1681 | 0.4035  | 0.3805 | 0.2538  | 0.5494 |
| OLIGO_11368 | AW462082 | KIFC1    | 0.2271  | 0.6554 | -0.5846 | 0.2197 | -0.3326 | 0.4045 | 0.1149  | 0.7420 |
| OLIGO_03667 | AW462087 | EPB41L5  | 0.5722  | 0.3446 | -0.9147 | 0.1322 | 0.0538  | 0.9234 | -0.0195 | 0.9711 |
| OLIGO_07652 | AW462089 | BLVRB    | -1.0500 | 0.0050 | 0.6203  | 0.0752 | -0.3153 | 0.2799 | -0.3544 | 0.1655 |
| OLIGO_03668 | AW462090 | DDX54    | -0.4631 | 0.1444 | 0.0417  | 0.8873 | -0.1647 | 0.5115 | -0.5103 | 0.0195 |
| OLIGO_02284 | AW462091 | BLMH     | -0.3423 | 0.6739 | -0.6402 | 0.4247 | 0.6760  | 0.3964 | 0.3798  | 0.6241 |
| OLIGO_06930 | AW462092 | PTGS2    | 1.2403  | 0.2284 | -1.9520 | 0.0429 | 3.1177  | 0.0001 | 3.5089  | 0.0000 |
| OLIGO_07063 | AW462094 | FUT6     | 0.5953  | 0.5247 | -0.2093 | 0.8192 | 1.4709  | 0.0333 | 0.7322  | 0.2285 |
| OLIGO_08394 | AW462097 | GAPVD1   | 0.3585  | 0.5224 | -0.5631 | 0.3058 | 1.7780  | 0.0111 | 1.6257  | 0.0183 |
| OLIGO_03669 | AW462100 | M-RIP    | 0.0571  | 0.8843 | 0.4517  | 0.2214 | 0.0189  | 0.9509 | 0.1375  | 0.6093 |
| OLIGO_03670 | AW462101 | NIBP     | 0.1108  | 0.7231 | -0.2096 | 0.4736 | 0.4347  | 0.0778 | 0.0991  | 0.6494 |
| OLIGO_03672 | AW462106 | Pfkfb2   | 0.3994  | 0.3232 | -0.4048 | 0.3019 | -0.0793 | 0.8146 | -0.0499 | 0.8751 |
| OLIGO_10695 | AW462111 | YAP1     | -0.3133 | 0.4102 | -0.4968 | 0.1596 | 0.4887  | 0.1127 | 0.1691  | 0.5179 |
| OLIGO_07918 | AW462117 | C15orf24 | 0.7959  | 0.0314 | -0.9161 | 0.0082 | 0.0835  | 0.7728 | -0.0336 | 0.8945 |
| OLIGO_10026 | AW462121 | BHLHB2   | -0.0574 | 0.9207 | 0.6814  | 0.2067 | -0.1440 | 0.7500 | 0.1596  | 0.6866 |
| OLIGO_07183 | AW462122 | CCM2     | 0.7060  | 0.3870 | 0.2685  | 0.7681 | -0.1150 | 0.8331 | -0.2836 | 0.5525 |
| OLIGO_11363 | AW462126 | LAD1     | 0.0266  | 0.9346 | 0.3049  | 0.3112 | 0.5819  | 0.3741 | 0.2394  | 0.7719 |
| OLIGO_08396 | AW462131 | TRPC4AP  | 0.5502  | 0.0682 | -0.1609 | 0.5679 | 0.0205  | 0.9309 | 0.1572  | 0.4468 |
| OLIGO_03674 | AW462132 | GJB3     | 1.4926  | 0.0002 | -2.0169 | 0.0000 | 1.0737  | 0.0006 | 0.9994  | 0.0002 |
| OLIGO_07207 | AW462134 | CXCL14   | -1.6017 | 0.0156 | 2.1275  | 0.0006 | -0.1991 | 0.7013 | 1.0626  | 0.0195 |
| OLIGO_08398 | AW462136 | LEPRE1   | -0.4999 | 0.0108 | 0.3270  | 0.0734 | 0.1397  | 0.3640 | 0.0320  | 0.8117 |
| OLIGO_08379 | AW462147 | CRSP7    | 0.1737  | 0.4970 | -0.1875 | 0.4512 | -0.0183 | 0.9348 | 0.0565  | 0.7928 |
| OLIGO_03677 | AW462148 | FAM100A  | 0.5017  | 0.3422 | -0.1953 | 0.6925 | -0.0236 | 0.9546 | -0.0010 | 0.9979 |
| OLIGO_03678 | AW462149 | NAPE-PLD | 0.1698  | 0.7158 | 0.2463  | 0.5723 | -0.1519 | 0.6778 | 0.2170  | 0.4976 |
| OLIGO_01256 | AW462157 | STARD5   | 0.5855  | 0.1074 | -0.2137 | 0.5291 | -0.5575 | 0.0506 | -0.0164 | 0.9474 |
| OLIGO_03679 | AW462158 | DDX28    | 0.5102  | 0.3903 | -0.8443 | 0.1525 | 0.1327  | 0.8154 | -0.0035 | 0.9949 |
| OLIGO_06944 | AW462161 | PITPNB   | 0.3812  | 0.1430 | -0.2259 | 0.3502 | -0.3980 | 0.0537 | -0.2137 | 0.2320 |
| OLIGO_07010 | AW462162 | FKSG24   | 0.8495  | 0.1652 | -0.7349 | 0.1991 | 0.3757  | 0.4331 | 0.0962  | 0.8187 |
| OLIGO_08262 | AW462168 | C20orf24 | 0.4237  | 0.2100 | -0.8639 | 0.0063 | -0.0831 | 0.7549 | -0.0256 | 0.9121 |
| OLIGO_07176 | AW462170 | RHEB     | 0.5559  | 0.1418 | -0.4685 | 0.1854 | 0.0334  | 0.9101 | 0.1139  | 0.6604 |
| OLIGO_07019 | AW462172 | ARSB     | 0.3813  | 0.4760 | 0.0718  | 0.8872 | -0.6339 | 0.1306 | -0.9298 | 0.0115 |

|             |          |           |         |        |         |        |         |        |         |        |
|-------------|----------|-----------|---------|--------|---------|--------|---------|--------|---------|--------|
| OLIGO_03681 | AW462178 | RAB6IP2   | 0.4290  | 0.4398 | -0.5977 | 0.2500 | 0.1082  | 0.8036 | 0.0440  | 0.9081 |
| OLIGO_03682 | AW462180 | RRAD      | 0.8111  | 0.0932 | -1.3917 | 0.0022 | 0.7890  | 0.0374 | 0.3667  | 0.2683 |
| OLIGO_08576 | AW462182 | PLAT      | -1.3286 | 0.0019 | 1.2541  | 0.0017 | 0.1056  | 0.7517 | 0.5811  | 0.0472 |
| OLIGO_03683 | AW462186 | MOSPD2    | 0.0625  | 0.8680 | -0.6276 | 0.0742 | -0.4268 | 0.1503 | -0.1457 | 0.5729 |
| OLIGO_08400 | AW462187 | FRAP1     | -0.0271 | 0.9539 | 0.0740  | 0.8660 | 0.8627  | 0.0192 | 0.8112  | 0.0120 |
| OLIGO_03685 | AW462195 | ITGBL1    | -0.1809 | 0.6451 | 0.0793  | 0.8320 | 0.3718  | 0.2097 | 0.2005  | 0.4375 |
| OLIGO_03686 | AW462196 | CPSF2     | 0.7945  | 0.0097 | -0.9754 | 0.0006 | -0.0146 | 0.9520 | 0.0103  | 0.9607 |
| OLIGO_11261 | AW462197 | RCN3      | 0.4764  | 0.3635 | 1.0270  | 0.0347 | 0.3324  | 0.4254 | -0.3328 | 0.3531 |
| OLIGO_03687 | AW462199 | CDC42SE2  | 0.9983  | 0.0253 | -0.6505 | 0.1185 | 1.1050  | 0.0016 | 0.9750  | 0.0015 |
| OLIGO_06189 | AW462203 | CRTC3     | 0.5124  | 0.0855 | -0.4349 | 0.1173 | 0.4010  | 0.0881 | 0.4110  | 0.0449 |
| OLIGO_06973 | AW462205 | KIAA0319L | 0.0480  | 0.8594 | -0.0350 | 0.8900 | 0.7645  | 0.0003 | 0.4438  | 0.0173 |
| OLIGO_07044 | AW462206 | ASRGL1    | 1.3797  | 0.0026 | -2.2159 | 0.0000 | 1.4206  | 0.0001 | 1.5394  | 0.0000 |
| OLIGO_06911 | AW462209 | ARHGEF1   | 0.6567  | 0.3274 | 0.1076  | 0.8653 | -0.1316 | 0.8020 | -0.2382 | 0.6041 |
| OLIGO_07334 | AW462220 | RANBP1    | -0.2439 | 0.5359 | 0.0194  | 0.9580 | -0.4324 | 0.1617 | -0.6455 | 0.0173 |
| OLIGO_03688 | AW462221 | LOC535768 | -0.3354 | 0.7376 | -0.1766 | 0.8450 | 2.4260  | 0.0197 | 2.0324  | 0.0380 |
| OLIGO_03689 | AW462223 | TYRO3     | 0.1398  | 0.7770 | -0.2909 | 0.5285 | 1.6689  | 0.0000 | 1.4321  | 0.0000 |
| OLIGO_08244 | AW462229 | KBTBD11   | -0.9480 | 0.1019 | 1.1948  | 0.0284 | -1.7166 | 0.0002 | -1.8225 | 0.0000 |
| OLIGO_11349 | AW462231 | HEXA      | 0.3271  | 0.3621 | -0.4764 | 0.1561 | 0.2187  | 0.4369 | 0.3125  | 0.2046 |
| OLIGO_06919 | AW462239 | DOPEY2    | -0.3508 | 0.4260 | 0.4945  | 0.2287 | 0.1258  | 0.7176 | 0.2237  | 0.4600 |
| OLIGO_06984 | AW462245 | ZNF143    | -0.3566 | 0.4113 | -0.0030 | 0.9940 | 1.5047  | 0.0000 | 1.3019  | 0.0000 |
| OLIGO_08336 | AW462247 | PSMA4     | 0.8329  | 0.0469 | -0.7851 | 0.0510 | -0.0947 | 0.7734 | -0.0554 | 0.8464 |
| OLIGO_08401 | AW462249 | BCAM      | -0.1838 | 0.5527 | -0.0284 | 0.9218 | 0.8713  | 0.0004 | 0.5430  | 0.0108 |
| OLIGO_03693 | AW462250 | NAB1      | 0.2439  | 0.6352 | -0.2529 | 0.5997 | -0.6158 | 0.1141 | -0.5383 | 0.1147 |
| OLIGO_06811 | AW462257 | CAPZA2    | 0.6907  | 0.0405 | -0.1910 | 0.5439 | -0.0668 | 0.8000 | 0.2376  | 0.3036 |
| OLIGO_03694 | AW462258 | DNAJC8    | -0.0522 | 0.8764 | -0.0619 | 0.8433 | -0.2492 | 0.3508 | -0.2935 | 0.2047 |
| OLIGO_07806 | AW462259 | MRPL54    | 0.6039  | 0.2774 | -0.3848 | 0.4591 | 0.5390  | 0.2161 | -0.0742 | 0.8457 |
| OLIGO_08169 | AW462262 | GRHPR     | -0.4822 | 0.1595 | 0.3647  | 0.2532 | -0.4405 | 0.2020 | -0.5334 | 0.1856 |
| OLIGO_10569 | AW462277 | LOC505788 | -0.2953 | 0.5454 | 0.5427  | 0.2350 | -0.2331 | 0.5501 | -0.4555 | 0.1811 |
| OLIGO_10548 | AW462278 | JUND      | 0.0683  | 0.8503 | 0.4510  | 0.1831 | -0.0086 | 0.9758 | 0.0138  | 0.9556 |
| OLIGO_03695 | AW462280 | KCNJ8     | -0.8536 | 0.3247 | 0.6266  | 0.4109 | 1.8806  | 0.0033 | 0.5898  | 0.2987 |
| OLIGO_03696 | AW462294 | NUP50     | 0.1563  | 0.8222 | -0.4912 | 0.4503 | 0.5073  | 0.3523 | 0.5686  | 0.2338 |
| OLIGO_07851 | AW462297 | ING1      | -0.1302 | 0.7877 | 0.4956  | 0.2734 | -0.4952 | 0.1917 | -0.3148 | 0.3429 |
| OLIGO_03955 | AW462298 | SF3B4     | -0.1212 | 0.7874 | -0.1173 | 0.7865 | -0.5485 | 0.2256 | -0.4005 | 0.3420 |
| OLIGO_07766 | AW462306 | TOR1A     | 0.0972  | 0.7817 | 0.1925  | 0.5598 | 0.2052  | 0.4553 | 0.0261  | 0.9137 |

|             |          |           |         |        |         |        |         |        |         |        |
|-------------|----------|-----------|---------|--------|---------|--------|---------|--------|---------|--------|
| OLIGO_07855 | AW462308 | SEC13L1   | 0.2606  | 0.4863 | -0.3111 | 0.3933 | 0.1581  | 0.6388 | 0.1141  | 0.7209 |
| OLIGO_08574 | AW462310 | IER5L     | -0.3293 | 0.3487 | 0.3913  | 0.2339 | 0.3342  | 0.2251 | 0.3052  | 0.2058 |
| OLIGO_08990 | AW462314 | BTF3      | -0.1516 | 0.7100 | -0.3601 | 0.3442 | -1.0108 | 0.0018 | -0.9264 | 0.0010 |
| OLIGO_07551 | AW462315 | EPS8L1    | 0.4218  | 0.2391 | -0.2388 | 0.4759 | -0.1374 | 0.6244 | -0.0118 | 0.9618 |
| OLIGO_07618 | AW462316 | SHQ1      | 0.2256  | 0.5180 | -0.4206 | 0.1963 | 0.3394  | 0.2184 | 0.5414  | 0.0245 |
| OLIGO_06865 | AW462319 | ATP5H     | 0.3238  | 0.1699 | -0.5466 | 0.0129 | -0.2553 | 0.1725 | -0.3062 | 0.0591 |
| OLIGO_01041 | AW462323 | SIPA1L2   | 0.0314  | 0.9401 | -0.1761 | 0.6659 | 0.0105  | 0.9787 | 0.2100  | 0.5823 |
| OLIGO_07870 | AW462328 | CASP8AP2  | 0.3593  | 0.2395 | -0.0661 | 0.8170 | 0.6135  | 0.0106 | 0.3398  | 0.1052 |
| OLIGO_11166 | AW462333 | GRRP1     | -0.4301 | 0.4546 | 0.2268  | 0.6684 | -0.1038 | 0.8262 | 0.1965  | 0.6623 |
| OLIGO_07474 | AW462334 | IBRDC3    | 0.2504  | 0.5089 | 0.7014  | 0.0534 | -0.5686 | 0.0584 | -0.3913 | 0.1316 |
| OLIGO_00086 | AW462335 | SULT1A1   | -0.0263 | 0.9532 | -0.1218 | 0.7715 | -0.1907 | 0.5873 | 0.0508  | 0.8688 |
| OLIGO_07685 | AW462337 | RALY      | 0.8242  | 0.0989 | -0.0653 | 0.8893 | -0.4438 | 0.2562 | 0.0536  | 0.8755 |
| OLIGO_07782 | AW462338 | VPS53     | 0.9003  | 0.1664 | -0.2144 | 0.7135 | -0.1207 | 0.8283 | 0.3338  | 0.5413 |
| OLIGO_07389 | AW462343 | NDUFS8    | -0.1861 | 0.5467 | 0.1097  | 0.7053 | 0.0132  | 0.9602 | -0.1786 | 0.5253 |
| OLIGO_07489 | AW462344 | PDXP      | 0.0299  | 0.9295 | 0.1451  | 0.6442 | 1.0090  | 0.0002 | 0.7134  | 0.0022 |
| OLIGO_07625 | AW462346 | SAMM50    | 0.2422  | 0.4136 | 0.0930  | 0.7337 | 0.1291  | 0.6136 | 0.0683  | 0.7728 |
| OLIGO_07697 | AW462347 | DUS2L     | 0.1464  | 0.7234 | 0.3267  | 0.3840 | 0.5266  | 0.0773 | 0.1958  | 0.4522 |
| OLIGO_07792 | AW462348 | MRPL34    | 0.4086  | 0.2615 | -0.8114 | 0.0174 | -0.1886 | 0.5082 | -0.1938 | 0.4374 |
| OLIGO_07883 | AW462350 | ARHGAP27  | -0.7289 | 0.1157 | 1.2229  | 0.0049 | 0.3009  | 0.4087 | 0.1322  | 0.6776 |
| OLIGO_09495 | AW462353 | LOC506205 | 0.2898  | 0.3549 | -0.3585 | 0.2234 | -0.1336 | 0.5871 | -0.2551 | 0.2358 |
| OLIGO_07283 | AW462354 | PACSN2    | 0.5864  | 0.2152 | -0.3780 | 0.4051 | 0.8917  | 0.0159 | 0.4731  | 0.1430 |
| OLIGO_05641 | AW462357 | ALDOC     | -0.5910 | 0.1416 | 1.3342  | 0.0004 | 0.0739  | 0.8157 | 0.1878  | 0.4963 |
| OLIGO_08409 | AW462359 | PARP4     | -0.1936 | 0.7990 | -0.3073 | 0.6869 | 1.6806  | 0.0532 | 0.8493  | 0.2291 |
| OLIGO_07963 | AW462362 | PSMD8     | 0.0050  | 0.9867 | -0.3369 | 0.2307 | -0.5756 | 0.0152 | -0.2563 | 0.2148 |
| OLIGO_08056 | AW462363 | C2orf25   | -0.1476 | 0.6764 | -0.0836 | 0.8030 | -0.4990 | 0.2394 | -0.3657 | 0.3579 |
| OLIGO_07229 | AW462364 | DIAPH1    | 0.5056  | 0.1827 | 0.0402  | 0.9093 | -0.0285 | 0.9242 | 0.0386  | 0.8823 |
| OLIGO_07707 | AW462368 | FAM18B    | 0.4978  | 0.1475 | -0.1967 | 0.5401 | 0.5245  | 0.0517 | 0.2913  | 0.2166 |
| OLIGO_07807 | AW462369 | RARRES1   | -0.9730 | 0.1296 | 0.2286  | 0.7030 | 2.4390  | 0.0000 | 2.5366  | 0.0000 |
| OLIGO_07155 | AW462370 | MGC23909  | 0.5148  | 0.3101 | -0.9382 | 0.0483 | 0.6777  | 0.0886 | 0.3433  | 0.3239 |
| OLIGO_07575 | AW462378 | FAM59A    | 0.5319  | 0.2660 | -0.3224 | 0.4793 | 0.6329  | 0.0879 | 0.4667  | 0.1504 |
| OLIGO_07639 | AW462379 | Ppt1      | 0.4099  | 0.2453 | -0.8723 | 0.0084 | 0.4179  | 0.1309 | 0.3595  | 0.1378 |
| OLIGO_07382 | AW462383 | ATP6AP2   | 0.5319  | 0.2930 | -0.9239 | 0.0502 | 0.5563  | 0.1646 | 0.1677  | 0.6293 |
| OLIGO_07237 | AW462385 | STX1A     | 0.6898  | 0.1816 | -0.7993 | 0.1389 | 0.0833  | 0.8361 | -0.2620 | 0.5351 |
| OLIGO_03698 | AW462390 | NAG8      | 0.3347  | 0.3333 | -0.3964 | 0.2192 | 0.2885  | 0.2905 | 0.1098  | 0.6441 |

|             |          |           |         |        |         |        |         |        |         |        |
|-------------|----------|-----------|---------|--------|---------|--------|---------|--------|---------|--------|
| OLIGO_07811 | AW462392 | CDH23     | -0.2247 | 0.6682 | 0.2442  | 0.6159 | 0.0453  | 0.9115 | -0.2685 | 0.4520 |
| OLIGO_07980 | AW462395 | CD163     | -0.8393 | 0.4695 | 1.1254  | 0.2614 | 1.1946  | 0.1874 | 2.2587  | 0.0067 |
| OLIGO_07242 | AW462397 | KIAA1012  | 0.5907  | 0.0215 | -0.8225 | 0.0007 | -0.0581 | 0.7747 | 0.0756  | 0.6712 |
| OLIGO_03699 | AW462404 | ATP12A    | -0.5013 | 0.4758 | -0.2104 | 0.7486 | 3.1780  | 0.0000 | 2.8854  | 0.0000 |
| OLIGO_11422 | AW462406 | EIF2AK1   | 0.2779  | 0.6225 | -0.3397 | 0.5200 | 0.9101  | 0.0412 | -0.0156 | 0.9689 |
| OLIGO_08193 | AW462407 | PSMD13    | -0.1480 | 0.7241 | -0.3984 | 0.3098 | -0.2747 | 0.4033 | -0.2018 | 0.4830 |
| OLIGO_10207 | AW462408 | SERINC1   | -0.2481 | 0.4629 | -0.2598 | 0.4104 | -0.4688 | 0.0787 | -0.0784 | 0.7359 |
| OLIGO_07306 | AW462410 | FZD5      | -0.9391 | 0.0765 | -0.2642 | 0.6037 | 0.6275  | 0.1229 | 0.3225  | 0.3646 |
| OLIGO_08229 | AW462412 | CLK2      | 0.3347  | 0.5072 | -0.1285 | 0.7927 | -0.2955 | 0.5406 | -0.1309 | 0.7793 |
| OLIGO_08412 | AW462414 | FAM53C    | 0.9355  | 0.0216 | -1.1252 | 0.0032 | -0.5003 | 0.1163 | -0.2764 | 0.3213 |
| OLIGO_03700 | AW462417 | EHMT1     | -0.7516 | 0.0753 | 0.8556  | 0.0306 | 0.2451  | 0.4586 | -0.0851 | 0.7687 |
| OLIGO_06541 | AW462432 | CTGF      | -0.5177 | 0.2116 | 0.5670  | 0.1449 | -0.4015 | 0.2189 | -0.0614 | 0.8291 |
| OLIGO_08415 | AW462434 | SLC9A2    | 0.2456  | 0.7476 | -0.1515 | 0.8327 | 2.5297  | 0.0744 | 1.5293  | 0.1955 |
| OLIGO_07600 | AW462436 | GNG10     | -0.3177 | 0.3097 | 0.4752  | 0.1034 | -0.7802 | 0.0017 | -0.5808 | 0.0072 |
| OLIGO_03702 | AW462437 | SAPS2     | 0.1519  | 0.8392 | -0.1191 | 0.8689 | 0.6050  | 0.3971 | 0.4961  | 0.4658 |
| OLIGO_10761 | AW462442 | ALAD      | -0.4601 | 0.3263 | 0.0570  | 0.8966 | 0.0431  | 0.9068 | 0.1404  | 0.6657 |
| OLIGO_06579 | AW462449 | EEF1B2    | -0.0110 | 0.9862 | -0.3206 | 0.5897 | -0.7668 | 0.1241 | -0.9406 | 0.0314 |
| OLIGO_07830 | AW462450 | RBPSUH    | 0.8751  | 0.0787 | -1.1943 | 0.0335 | 0.5184  | 0.2367 | 0.5257  | 0.2448 |
| OLIGO_09980 | AW462453 | HIP1      | 0.9302  | 0.1604 | -0.9018 | 0.1361 | 1.2877  | 0.0108 | 1.4714  | 0.0009 |
| OLIGO_07914 | AW462454 | SACM1L    | 0.4754  | 0.1841 | -0.7954 | 0.0178 | 0.0629  | 0.8224 | 0.2766  | 0.2599 |
| OLIGO_07668 | AW462459 | EVA1      | 1.5648  | 0.1053 | -2.7047 | 0.0098 | 1.3162  | 0.1490 | 0.9143  | 0.2871 |
| OLIGO_03703 | AW462460 | MKX       | 0.2533  | 0.5192 | -0.3695 | 0.3148 | 0.6319  | 0.0406 | 0.5170  | 0.0556 |
| OLIGO_03953 | AW462461 | ELMO3     | 0.3887  | 0.5715 | -0.8520 | 0.1819 | 1.9822  | 0.0002 | 1.2592  | 0.0076 |
| OLIGO_07204 | AW462462 | CREBL1    | -0.0363 | 0.9091 | 0.4975  | 0.1446 | 0.3551  | 0.2582 | 0.2788  | 0.3453 |
| OLIGO_10163 | AW462464 | DNAH17    | 0.4685  | 0.2036 | 0.3940  | 0.2529 | 0.3848  | 0.1852 | 0.5276  | 0.0445 |
| OLIGO_07347 | AW462466 | SOD1      | -0.8812 | 0.0449 | 1.0462  | 0.0110 | -0.1120 | 0.7447 | -0.0837 | 0.7816 |
| OLIGO_03704 | AW462469 | FLJ43339  | 0.4350  | 0.1667 | -0.2588 | 0.3683 | -0.4875 | 0.0445 | -0.4435 | 0.0347 |
| OLIGO_10711 | AW462471 | COMT      | 0.3363  | 0.6642 | -0.0876 | 0.9064 | -0.3270 | 0.6433 | -0.3397 | 0.6216 |
| OLIGO_10586 | AW462476 | APOA1     | -1.3073 | 0.0544 | 0.9146  | 0.1498 | 0.4265  | 0.4232 | -0.1846 | 0.6948 |
| OLIGO_03705 | AW462477 | FPGS      | 1.2413  | 0.0518 | -0.9394 | 0.1152 | -0.6632 | 0.1843 | -0.5424 | 0.2148 |
| OLIGO_10670 | AW462478 | HTRA1     | -2.2698 | 0.0000 | 2.7096  | 0.0000 | 0.0565  | 0.8579 | -0.0567 | 0.8345 |
| OLIGO_07773 | AW462480 | SREBF1    | 0.1002  | 0.8829 | 0.7375  | 0.2523 | -0.3623 | 0.5024 | -0.3175 | 0.4980 |
| OLIGO_03706 | AW462482 | LYST      | 0.0093  | 0.9884 | 0.3667  | 0.5409 | -0.0311 | 0.9506 | -0.1191 | 0.7866 |
| OLIGO_08967 | AW462485 | ORF1-FL49 | 1.3460  | 0.0002 | -1.3831 | 0.0000 | 0.1076  | 0.7039 | 0.0265  | 0.9141 |

|             |          |              |         |        |         |        |         |        |         |        |
|-------------|----------|--------------|---------|--------|---------|--------|---------|--------|---------|--------|
| OLIGO_11424 | AW462492 | BTBD7        | 0.6476  | 0.1016 | -0.9195 | 0.0143 | 0.2379  | 0.4418 | 0.1419  | 0.6002 |
| OLIGO_08042 | AW462493 | CCNL1        | 0.1324  | 0.6703 | -0.7779 | 0.0078 | -0.9335 | 0.0002 | -0.5675 | 0.0082 |
| OLIGO_08049 | AW462503 | CSDA         | -1.8101 | 0.0002 | 1.4450  | 0.0016 | -0.3419 | 0.3822 | -0.1998 | 0.5515 |
| OLIGO_03708 | AW462506 | SNAP23       | -0.2622 | 0.6071 | -0.0212 | 0.9646 | 1.0358  | 0.0104 | 0.9648  | 0.0061 |
| OLIGO_07787 | AW462509 | LOC523454    | 0.9038  | 0.0498 | -1.1169 | 0.0093 | 1.6885  | 0.0000 | 1.5652  | 0.0000 |
| OLIGO_07130 | AW462510 | SIAH2        | -0.1547 | 0.6577 | 0.0651  | 0.8420 | -0.3791 | 0.1664 | -0.2786 | 0.2452 |
| OLIGO_07223 | AW462514 | GSPT1        | 0.5569  | 0.2495 | -0.7903 | 0.0800 | 1.6503  | 0.0000 | 1.8484  | 0.0000 |
| OLIGO_07499 | AW462517 | GAA          | 0.0077  | 0.9919 | -0.2964 | 0.6751 | -0.1003 | 0.8655 | -0.2296 | 0.6581 |
| OLIGO_07561 | AW462518 | AU016693     | 0.2608  | 0.3396 | 0.0593  | 0.8159 | 0.5419  | 0.0122 | 0.5400  | 0.0042 |
| OLIGO_07633 | AW462519 | CHKB         | 0.1570  | 0.7053 | -0.7861 | 0.0475 | 0.0717  | 0.8235 | -0.0752 | 0.7893 |
| OLIGO_07799 | AW462521 | ABCG2        | -0.1783 | 0.5990 | 0.2237  | 0.4860 | 0.1513  | 0.5689 | 0.1219  | 0.6000 |
| OLIGO_10589 | AW462524 | RPS18        | -0.5269 | 0.4054 | 0.2453  | 0.6786 | -0.8918 | 0.0727 | -1.3584 | 0.0019 |
| OLIGO_07289 | AW462527 | PLB1         | 0.1281  | 0.7575 | 0.1377  | 0.7227 | 0.2157  | 0.5075 | 0.6861  | 0.0164 |
| OLIGO_09205 | AW462529 | INADL        | 0.5509  | 0.2579 | -0.2797 | 0.5390 | 1.3860  | 0.0003 | 1.4042  | 0.0000 |
| OLIGO_08422 | AW462537 | SESN1        | -0.1106 | 0.6746 | 0.1659  | 0.4998 | 0.6276  | 0.0026 | 0.5947  | 0.0011 |
| OLIGO_08275 | AW462538 | SNRPB2       | 0.0316  | 0.9024 | -0.4588 | 0.0559 | -0.5526 | 0.0070 | -0.4677 | 0.0085 |
| OLIGO_03709 | AW462539 | MAPK6        | -0.1713 | 0.6929 | 0.1429  | 0.7238 | 0.9452  | 0.0803 | 0.7743  | 0.1387 |
| OLIGO_07976 | AW462546 | COPZ2        | -1.1879 | 0.1492 | 0.8765  | 0.2716 | -0.0631 | 0.9346 | -0.0511 | 0.9454 |
| OLIGO_07645 | AW462553 | EIF2S1       | 0.6459  | 0.1379 | -0.8942 | 0.0283 | -0.4043 | 0.2358 | -0.3517 | 0.2388 |
| OLIGO_07714 | AW462554 | RP5-1022P6.2 | 1.0750  | 0.0071 | -1.6943 | 0.0000 | 0.0601  | 0.8480 | 0.4119  | 0.1316 |
| OLIGO_10185 | AW462555 | YIPF6        | 1.4018  | 0.0019 | -1.4964 | 0.0004 | -0.0620 | 0.8598 | 0.1637  | 0.5945 |
| OLIGO_10734 | AW462563 | ECHDC1       | 0.4991  | 0.1286 | -0.6753 | 0.0281 | -0.1458 | 0.5706 | 0.1257  | 0.5764 |
| OLIGO_11350 | AW462569 | MLKL         | -0.6166 | 0.2206 | 0.6388  | 0.2021 | 1.0844  | 0.0038 | 0.6504  | 0.0508 |
| OLIGO_11594 | AW462573 | ANXA1        | 0.6968  | 0.1654 | -0.9907 | 0.0352 | -0.3157 | 0.4222 | 0.0214  | 0.9505 |
| OLIGO_03710 | AW462574 | MGC137146    | 0.1156  | 0.7577 | 0.4928  | 0.1600 | 0.4102  | 0.1628 | 0.4442  | 0.0844 |
| OLIGO_11423 | AW462575 | AGA          | -0.4712 | 0.2569 | -0.1729 | 0.6540 | -0.4817 | 0.2253 | -0.1641 | 0.6461 |
| OLIGO_07256 | AW462578 | PANK4        | -0.4451 | 0.1323 | 0.5864  | 0.0342 | 0.3532  | 0.1276 | 0.3331  | 0.1008 |
| OLIGO_07411 | AW462580 | CCDC49       | 0.7761  | 0.0654 | -0.3043 | 0.4232 | 0.1301  | 0.7155 | 0.2583  | 0.4591 |
| OLIGO_11357 | AW462583 | SLCO2A1      | 0.6076  | 0.3084 | 0.2864  | 0.6009 | 0.4851  | 0.3817 | 0.8622  | 0.1905 |
| OLIGO_07729 | AW462584 | GUSB         | 0.2957  | 0.1680 | -0.1419 | 0.4760 | 0.2974  | 0.0806 | 0.3013  | 0.0411 |
| OLIGO_07192 | AW462585 | DGKA         | -0.2403 | 0.5510 | 1.1078  | 0.0036 | 0.7653  | 0.0160 | 0.4736  | 0.0944 |
| OLIGO_08426 | AW462588 | Zzef1        | 0.2966  | 0.5496 | -0.3886 | 0.4020 | 0.6468  | 0.0972 | 0.2534  | 0.4631 |
| OLIGO_02164 | AW462589 | SMARCA1      | -2.3802 | 0.0000 | 2.6831  | 0.0000 | 1.8803  | 0.0000 | 1.2371  | 0.0010 |
| OLIGO_07429 | AW462591 | ARMC1        | 0.9917  | 0.0012 | -1.0536 | 0.0002 | 0.1488  | 0.5351 | 0.1090  | 0.6034 |

|             |          |           |         |        |         |        |         |        |         |        |
|-------------|----------|-----------|---------|--------|---------|--------|---------|--------|---------|--------|
| OLIGO_07524 | AW462592 | TMEM97    | 0.3236  | 0.3238 | -0.2445 | 0.4226 | 1.1077  | 0.0000 | 0.9164  | 0.0001 |
| OLIGO_07917 | AW462597 | CCL2      | -0.1857 | 0.6612 | 0.2097  | 0.5876 | 0.5679  | 0.0784 | 0.5292  | 0.0611 |
| OLIGO_08092 | AW462599 | LOC506627 | 0.2309  | 0.6280 | 0.2802  | 0.5288 | -2.2060 | 0.0000 | -1.2594 | 0.0001 |
| OLIGO_07325 | AW462601 | EFNA4     | -0.0948 | 0.6428 | 0.4184  | 0.0284 | 0.4564  | 0.0050 | 0.6795  | 0.0000 |
| OLIGO_03712 | AW462606 | SMAD1     | 0.6758  | 0.1385 | -0.7582 | 0.0757 | 0.4477  | 0.2102 | 0.3669  | 0.2409 |
| OLIGO_08104 | AW462610 | MMP15     | -0.1233 | 0.7356 | -0.2761 | 0.4188 | 0.6655  | 0.0204 | 0.6806  | 0.0068 |
| OLIGO_03713 | AW462616 | SH2D4A    | 0.2332  | 0.7473 | 0.2217  | 0.7536 | 0.6558  | 0.3501 | 0.2983  | 0.6608 |
| OLIGO_08019 | AW462617 | PRSS15    | -0.1967 | 0.5725 | 0.3775  | 0.2807 | -0.4245 | 0.2222 | -0.3160 | 0.3283 |
| OLIGO_10623 | AW462621 | TAX1BP1   | 0.7375  | 0.0575 | -1.2637 | 0.0005 | 0.4573  | 0.1347 | 0.5573  | 0.0368 |
| OLIGO_07444 | AW462623 | GRPEL2    | -0.1844 | 0.5605 | -0.2026 | 0.4941 | 0.5009  | 0.0441 | 0.4423  | 0.0423 |
| OLIGO_03714 | AW462634 | DNASE1L1  | 0.4765  | 0.1076 | -0.4258 | 0.1241 | 0.5357  | 0.0212 | 0.4846  | 0.0173 |
| OLIGO_07759 | AW462636 | Wdr45l    | 0.3564  | 0.1010 | -0.3498 | 0.0843 | -0.2992 | 0.0812 | -0.3310 | 0.0270 |
| OLIGO_07843 | AW462637 | AGPAT5    | 1.2085  | 0.0013 | -1.5136 | 0.0000 | 0.5696  | 0.0552 | 0.6505  | 0.0115 |
| OLIGO_08713 | AW462639 | SIAHBP1   | 0.5328  | 0.2130 | -0.7771 | 0.0524 | -0.5869 | 0.0803 | -0.4644 | 0.1139 |
| OLIGO_07441 | AW462645 | 40436.00  | -0.1951 | 0.6668 | 0.0246  | 0.9537 | -0.0986 | 0.7813 | 0.1281  | 0.6803 |
| OLIGO_08126 | AW462649 | C1orf160  | 0.5471  | 0.0627 | -0.5190 | 0.0561 | 0.2835  | 0.2291 | 0.4261  | 0.0341 |
| OLIGO_03960 | AW462658 | STK24     | 0.1618  | 0.7309 | -0.6034 | 0.1732 | -0.2815 | 0.5295 | -0.4024 | 0.2654 |
| OLIGO_08428 | AW462662 | NGLY1     | 0.3911  | 0.4377 | -1.2194 | 0.0099 | 0.7799  | 0.0487 | 0.8457  | 0.0148 |
| OLIGO_07048 | AW462665 | TARBP2    | -0.1521 | 0.5892 | 0.1697  | 0.5165 | 0.3896  | 0.0758 | 0.2127  | 0.2694 |
| OLIGO_11371 | AW462667 | VKORC1    | -0.3185 | 0.6633 | 0.2456  | 0.7197 | 0.9968  | 0.0838 | 1.1016  | 0.0325 |
| OLIGO_08462 | AW462669 | LRRC8E    | 0.1839  | 0.6525 | -0.0141 | 0.9703 | -0.5952 | 0.0669 | -0.2144 | 0.4499 |
| OLIGO_10778 | AW462671 | Rassf3    | 0.2577  | 0.5482 | -0.5465 | 0.2173 | 0.2462  | 0.5353 | 0.0734  | 0.8416 |
| OLIGO_03717 | AW462672 | LOC652891 | 0.4907  | 0.3412 | -1.4527 | 0.0027 | -0.2169 | 0.5912 | -0.0780 | 0.8255 |
| OLIGO_03970 | AW462673 | SERGEF    | -0.2688 | 0.5990 | -0.1734 | 0.7208 | -0.8563 | 0.1546 | -0.8033 | 0.1932 |
| OLIGO_10758 | AW462674 | DES       | -0.3755 | 0.5378 | 0.0802  | 0.8879 | 0.4271  | 0.4725 | 0.6800  | 0.3365 |
| OLIGO_08471 | AW462679 | ATP1B3    | 1.0861  | 0.0040 | -1.8393 | 0.0000 | 0.2056  | 0.4907 | 0.1185  | 0.6434 |
| OLIGO_03718 | AW462683 | TNIK      | 0.2128  | 0.7912 | 0.0710  | 0.9266 | -0.1132 | 0.8771 | 0.0313  | 0.9646 |
| OLIGO_03962 | AW462691 | PHLDB2    | 0.4854  | 0.4280 | -0.5617 | 0.3386 | -0.8778 | 0.1353 | -0.3111 | 0.5356 |
| OLIGO_08640 | AW462694 | ZNF333    | -0.3830 | 0.7584 | -0.0973 | 0.9292 | 0.2509  | 0.7943 | -0.0287 | 0.9754 |
| OLIGO_08431 | AW462696 | SH3GLB2   | -0.3085 | 0.6237 | 0.3274  | 0.5776 | -0.8468 | 0.0872 | -0.4691 | 0.2880 |
| OLIGO_08230 | AW462697 | SRPK2     | -0.1347 | 0.6408 | 0.2803  | 0.2959 | -0.2502 | 0.2837 | -0.1763 | 0.3749 |
| OLIGO_09686 | AW462698 | TMEM42    | -0.7685 | 0.0739 | 1.0666  | 0.0227 | 0.2911  | 0.4060 | 0.2570  | 0.4406 |
| OLIGO_03963 | AW462702 | PIP5K2C   | 0.1354  | 0.7873 | -0.7099 | 0.1926 | 0.0322  | 0.9431 | -0.0540 | 0.8992 |
| OLIGO_03964 | AW462703 | HYI       | -0.1316 | 0.7350 | 0.2985  | 0.4117 | -0.2526 | 0.4079 | -0.1614 | 0.5496 |

|             |          |           |         |        |         |        |         |        |         |        |
|-------------|----------|-----------|---------|--------|---------|--------|---------|--------|---------|--------|
| OLIGO_03719 | AW462705 | CPNE3     | 1.2439  | 0.0024 | -1.3845 | 0.0003 | 0.6764  | 0.0361 | 0.3669  | 0.1906 |
| OLIGO_08714 | AW462706 | MOBK1B    | 0.6862  | 0.0240 | -1.1109 | 0.0001 | -0.0039 | 0.9873 | 0.2640  | 0.2057 |
| OLIGO_11428 | AW462708 | ABHD6     | 1.2043  | 0.0019 | -1.0531 | 0.0035 | 1.3245  | 0.0000 | 0.7096  | 0.0077 |
| OLIGO_08328 | AW462711 | LOC616635 | 0.5296  | 0.5001 | -0.0171 | 0.9819 | 0.7957  | 0.2933 | 0.4931  | 0.4873 |
| OLIGO_08437 | AW462713 | WARS2     | 0.9097  | 0.0416 | -0.6380 | 0.1283 | 0.1880  | 0.5902 | 0.3080  | 0.3154 |
| OLIGO_08478 | AW462714 | IL15RA    | -0.3918 | 0.3679 | 1.0717  | 0.0087 | -0.2342 | 0.4922 | -0.3183 | 0.2864 |
| OLIGO_08433 | AW462717 | LOC51149  | 0.0455  | 0.9206 | -0.6190 | 0.1465 | 1.3636  | 0.0002 | 0.6046  | 0.0549 |
| OLIGO_10615 | AW462718 | RPL14     | -0.4330 | 0.2803 | -0.1475 | 0.6905 | -0.8956 | 0.0052 | -1.0569 | 0.0001 |
| OLIGO_03720 | AW462720 | INCENP    | 0.7079  | 0.0792 | -0.8667 | 0.0215 | 0.5083  | 0.1045 | 0.2697  | 0.3248 |
| OLIGO_03721 | AW462721 | FADD      | 0.2828  | 0.5829 | -0.0648 | 0.8922 | 0.5529  | 0.3464 | 0.4357  | 0.4186 |
| OLIGO_10665 | AW462723 | PIN1      | 0.3407  | 0.3827 | -0.2962 | 0.4319 | -0.5132 | 0.1806 | -0.2617 | 0.4552 |
| OLIGO_06999 | AW462724 | NPM1      | -0.4486 | 0.4509 | 0.1541  | 0.7831 | -0.9651 | 0.0389 | -1.2564 | 0.0022 |
| OLIGO_10745 | AW462725 | ADI1      | -1.3340 | 0.0766 | 1.2126  | 0.0974 | -0.3712 | 0.5176 | 0.0768  | 0.8813 |
| OLIGO_10535 | AW462727 | KIAA1522  | -0.2704 | 0.4334 | 0.4062  | 0.2065 | 0.1010  | 0.7114 | -0.6809 | 0.0043 |
| OLIGO_07844 | AW462728 | MLLT4     | 0.1985  | 0.7322 | -0.4326 | 0.4253 | 0.3676  | 0.4188 | 0.3457  | 0.3852 |
| OLIGO_08434 | AW462731 | CSNK1G3   | 0.0009  | 0.9978 | -0.0369 | 0.9076 | 0.7033  | 0.0710 | 0.4451  | 0.1898 |
| OLIGO_08524 | AW462733 | RPN1      | 0.2776  | 0.5242 | -0.6015 | 0.1404 | 1.1862  | 0.0006 | 0.2571  | 0.3900 |
| OLIGO_08243 | AW462739 | SFT2D1    | 0.5412  | 0.2498 | -0.9199 | 0.0365 | -0.3125 | 0.3989 | -0.2373 | 0.4626 |
| OLIGO_08662 | AW462747 | PLS3      | -0.8624 | 0.0315 | 0.8660  | 0.0210 | -0.3402 | 0.2779 | -0.0599 | 0.8273 |
| OLIGO_03968 | AW462753 | PRRG2     | 0.2618  | 0.5643 | -0.1000 | 0.8143 | -0.2882 | 0.5028 | -0.2251 | 0.5824 |
| OLIGO_07240 | AW462757 | ZNF207    | 0.0751  | 0.7903 | -0.5086 | 0.0545 | -0.3886 | 0.0840 | -0.3473 | 0.0771 |
| OLIGO_08600 | AW462770 | MGC3265   | -0.3235 | 0.3559 | 0.2205  | 0.5009 | -0.3475 | 0.2057 | 0.0127  | 0.9579 |
| OLIGO_08608 | AW462778 | MMACHC    | 0.2190  | 0.5422 | -0.2297 | 0.5094 | 0.4823  | 0.2474 | 0.4592  | 0.3002 |
| OLIGO_08442 | AW462786 | ZF        | 0.3613  | 0.3652 | -0.0712 | 0.8487 | -0.5774 | 0.0703 | -0.2364 | 0.3900 |
| OLIGO_08443 | AW462792 | MRPL32    | 0.6034  | 0.0313 | -0.3824 | 0.1461 | 0.0756  | 0.7298 | -0.0249 | 0.8966 |
| OLIGO_03969 | AW462799 | NAP1L5    | -1.2962 | 0.0045 | 1.2182  | 0.0043 | -0.1155 | 0.7455 | -0.1987 | 0.5238 |
| OLIGO_07191 | AW462800 | PROS1     | 0.6235  | 0.3669 | -1.0408 | 0.1166 | 2.9090  | 0.0000 | 2.2154  | 0.0000 |
| OLIGO_03723 | AW462803 | C9orf25   | -0.0063 | 0.9854 | 0.2711  | 0.3915 | -0.3601 | 0.1840 | -0.0348 | 0.8817 |
| OLIGO_08348 | AW462805 | VPS25     | 0.3094  | 0.2410 | -0.2728 | 0.2689 | -0.1553 | 0.4528 | -0.0809 | 0.6550 |
| OLIGO_08413 | AW462806 | FNTA      | -0.2954 | 0.4907 | -0.7761 | 0.0819 | -0.3744 | 0.3407 | -0.0365 | 0.9187 |
| OLIGO_06901 | AW462807 | OACT2     | -0.3173 | 0.3522 | 0.0492  | 0.8769 | 1.4755  | 0.0000 | 0.9772  | 0.0000 |
| OLIGO_08559 | AW462809 | C10orf35  | 0.1836  | 0.5420 | 0.2643  | 0.3474 | 0.2657  | 0.2623 | 0.2442  | 0.2380 |
| OLIGO_08445 | AW462812 | KLF9      | 0.2734  | 0.7394 | 0.3529  | 0.6461 | 0.2062  | 0.7537 | 0.0137  | 0.9816 |
| OLIGO_03725 | AW462817 | LIPH      | 0.6737  | 0.0230 | -0.4332 | 0.1176 | 0.6071  | 0.0092 | 0.4538  | 0.0273 |

|             |          |           |         |        |         |        |         |        |         |        |
|-------------|----------|-----------|---------|--------|---------|--------|---------|--------|---------|--------|
| OLIGO_03726 | AW462818 | MRPS24    | 0.4564  | 0.2619 | -0.8293 | 0.0296 | -0.1540 | 0.6288 | -0.1016 | 0.7155 |
| OLIGO_07406 | AW462820 | AHCY      | -0.4344 | 0.3972 | 0.0162  | 0.9730 | -0.3088 | 0.4430 | -0.2762 | 0.4329 |
| OLIGO_03971 | AW462822 | XRCC1     | -0.9845 | 0.0002 | 0.5695  | 0.0178 | -0.3636 | 0.0778 | -0.3022 | 0.0882 |
| OLIGO_10781 | AW462823 | LOC506420 | 0.5682  | 0.0815 | -0.2136 | 0.4822 | 0.4990  | 0.0542 | 0.2052  | 0.3599 |
| OLIGO_08446 | AW462824 | HMG20B    | 0.1563  | 0.7533 | -0.4438 | 0.3403 | 0.5309  | 0.1734 | 0.1334  | 0.6968 |
| OLIGO_10073 | AW462834 | LOC388519 | -0.6802 | 0.0340 | 0.0614  | 0.8374 | 0.5565  | 0.0270 | 0.1244  | 0.5727 |
| OLIGO_08447 | AW462836 | ABHD10    | -0.7918 | 0.0317 | 0.0697  | 0.8383 | -0.0879 | 0.7627 | -0.3221 | 0.2023 |
| OLIGO_08448 | AW462842 | CDC42SE1  | 0.2160  | 0.6314 | -0.4546 | 0.2787 | -0.0594 | 0.8638 | -0.0428 | 0.8879 |
| OLIGO_08449 | AW462843 | CFLAR     | -0.8753 | 0.0356 | 1.7127  | 0.0000 | 0.5435  | 0.0956 | 0.6472  | 0.0236 |
| OLIGO_03973 | AW462844 | UBXD8     | 0.6946  | 0.1294 | -0.8099 | 0.0579 | 1.2277  | 0.0007 | 1.0177  | 0.0013 |
| OLIGO_08280 | AW462848 | SP100     | -0.7546 | 0.0640 | 0.6389  | 0.0968 | 0.3842  | 0.2198 | 0.1733  | 0.5263 |
| OLIGO_08430 | AW462851 | CRELD2    | 0.3708  | 0.1549 | -0.1814 | 0.4566 | -0.2872 | 0.1598 | -0.3255 | 0.0690 |
| OLIGO_10601 | AW462860 | AKT1      | -0.4607 | 0.4853 | 0.5862  | 0.3453 | -0.0850 | 0.8706 | -0.6601 | 0.1461 |
| OLIGO_08450 | AW462861 | GBA       | 0.1771  | 0.4324 | 0.1245  | 0.5542 | 0.2075  | 0.2431 | 0.2831  | 0.0686 |
| OLIGO_08451 | AW462864 | PJA1      | -0.3957 | 0.1961 | 0.7609  | 0.0081 | -0.1468 | 0.5457 | -0.0495 | 0.8169 |
| OLIGO_08150 | AW462866 | EIF5A     | 0.7426  | 0.1763 | -0.3106 | 0.5451 | -0.8675 | 0.0441 | -0.6714 | 0.0750 |
| OLIGO_03728 | AW462873 | WWC1      | -0.0679 | 0.9042 | 0.2439  | 0.6566 | 0.3508  | 0.5118 | 0.4129  | 0.4351 |
| OLIGO_08514 | AW462876 | AKR1A1    | -0.6036 | 0.0891 | 0.8854  | 0.0076 | -0.4550 | 0.1053 | -0.4387 | 0.0768 |
| OLIGO_08237 | AW462882 | SCARA5    | 0.3788  | 0.3392 | -0.7014 | 0.0502 | -0.6325 | 0.0599 | -0.0895 | 0.7444 |
| OLIGO_03729 | AW462885 | Stk35     | 0.2268  | 0.3938 | -0.7783 | 0.0017 | 0.1907  | 0.3678 | -0.0455 | 0.8019 |
| OLIGO_08424 | AW462887 | ZFP64     | -0.1324 | 0.8351 | -0.1216 | 0.8446 | 1.3901  | 0.0327 | 0.9277  | 0.1293 |
| OLIGO_12524 | AW462889 | ACTG2     | -0.7716 | 0.2888 | 0.5265  | 0.4504 | -0.2179 | 0.7408 | 0.1651  | 0.7939 |
| OLIGO_07895 | AW462891 | TRRAP     | 0.0643  | 0.7874 | -0.2191 | 0.3240 | -0.3632 | 0.0549 | -0.0707 | 0.6664 |
| OLIGO_08251 | AW462892 | CYP11A1   | 0.6745  | 0.3718 | -0.8651 | 0.2201 | 2.7219  | 0.0000 | 2.8790  | 0.0000 |
| OLIGO_08531 | AW462895 | CRIPT     | -0.5051 | 0.2828 | -0.1588 | 0.7230 | 0.5612  | 0.1101 | 0.0688  | 0.8244 |
| OLIGO_08453 | AW462899 | NAPA      | 0.6357  | 0.3952 | -0.2923 | 0.6759 | 0.0009  | 0.9987 | -0.3023 | 0.5556 |
| OLIGO_06644 | AW462901 | GMFG      | -0.1384 | 0.6876 | 0.3508  | 0.2739 | 0.9060  | 0.0009 | 0.7611  | 0.0014 |
| OLIGO_10034 | AW462906 | LOC512236 | -0.1597 | 0.4508 | 0.3275  | 0.0980 | -0.3523 | 0.0351 | -0.1512 | 0.2990 |
| OLIGO_10699 | AW462911 | WNT4      | 0.3040  | 0.5641 | -0.0433 | 0.9288 | 0.9290  | 0.0224 | 1.0089  | 0.0047 |
| OLIGO_03730 | AW462913 | RBM9      | -0.4171 | 0.2280 | 0.1362  | 0.6408 | -0.1198 | 0.6692 | -0.0660 | 0.7903 |
| OLIGO_07196 | AW462924 | RAB1A     | 0.9366  | 0.0573 | -0.6873 | 0.1355 | -0.1311 | 0.7338 | 0.2648  | 0.4331 |
| OLIGO_08021 | AW462925 | GPS1      | -0.0601 | 0.8751 | -0.0235 | 0.9476 | -0.4328 | 0.1490 | -0.2703 | 0.3031 |
| OLIGO_06537 | AW462937 | MSH2      | 0.2046  | 0.5376 | 0.1167  | 0.7049 | -1.0083 | 0.0001 | -0.6758 | 0.0033 |
| OLIGO_01679 | AW462941 | GNAI3     | -0.1856 | 0.5505 | -0.2408 | 0.4041 | -0.2990 | 0.2260 | -0.0016 | 0.9938 |

|             |          |           |         |        |         |        |         |        |         |        |
|-------------|----------|-----------|---------|--------|---------|--------|---------|--------|---------|--------|
| OLIGO_06547 | AW462944 | HSPC148   | -0.0575 | 0.8350 | -0.0118 | 0.9635 | -0.5051 | 0.0206 | -0.2291 | 0.2272 |
| OLIGO_10172 | AW462946 | RBM14     | 0.4806  | 0.1411 | -0.0335 | 0.9126 | -0.1981 | 0.4386 | -0.2406 | 0.2826 |
| OLIGO_03731 | AW462951 | Ptp4a2    | -0.0434 | 0.8746 | -0.2521 | 0.3260 | -0.2696 | 0.2142 | -0.2279 | 0.2284 |
| OLIGO_08946 | AW462952 | NP        | -0.1928 | 0.5303 | -0.0063 | 0.9826 | -0.3091 | 0.2019 | -0.1102 | 0.6017 |
| OLIGO_09097 | AW462955 | MOSPD1    | 0.7933  | 0.2067 | -1.5179 | 0.0373 | 1.3849  | 0.0624 | 1.3454  | 0.0781 |
| OLIGO_08274 | AW462956 | BNIP3     | 0.1815  | 0.6354 | -0.0056 | 0.9876 | -1.1808 | 0.1061 | -0.7722 | 0.1967 |
| OLIGO_08952 | AW462961 | SLMAP     | 0.2051  | 0.7011 | -0.2785 | 0.5904 | 0.8465  | 0.1160 | 0.7323  | 0.1529 |
| OLIGO_03987 | AW462963 | FLJ13576  | 0.4122  | 0.4447 | -1.0491 | 0.0670 | -0.1567 | 0.7521 | 0.0626  | 0.8948 |
| OLIGO_10881 | AW462964 | RNPC1     | -0.3098 | 0.4741 | 0.2671  | 0.5094 | 0.6422  | 0.0588 | 0.9435  | 0.0016 |
| OLIGO_09151 | AW462965 | INSL3     | -0.0740 | 0.7930 | 0.1533  | 0.5598 | 0.5716  | 0.0105 | 0.2396  | 0.2168 |
| OLIGO_10975 | AW462967 | SND1      | 1.0288  | 0.0059 | -0.6635 | 0.0568 | -0.5844 | 0.0455 | -0.1844 | 0.4702 |
| OLIGO_03732 | AW462972 | ACE       | -0.2277 | 0.5787 | -0.0777 | 0.8345 | -0.2820 | 0.3510 | -0.2490 | 0.3441 |
| OLIGO_09043 | AW462974 | ENAH      | 0.7902  | 0.2143 | -1.1836 | 0.0470 | 2.2362  | 0.0000 | 2.0284  | 0.0000 |
| OLIGO_03981 | AW462979 | UBL7      | 0.2417  | 0.3438 | -0.5810 | 0.0153 | -0.0593 | 0.7667 | 0.0765  | 0.6620 |
| OLIGO_08893 | AW462980 | ZUBR1     | 0.3827  | 0.2339 | -0.4734 | 0.1383 | 0.4963  | 0.1180 | 0.2469  | 0.3586 |
| OLIGO_09154 | AW462983 | ZNF34     | -1.1285 | 0.0008 | 1.2390  | 0.0001 | 0.0844  | 0.7502 | 0.2605  | 0.2592 |
| OLIGO_10473 | AW462985 | BIRC5     | -0.7736 | 0.1444 | 0.3899  | 0.4312 | -1.0363 | 0.0138 | -1.2972 | 0.0005 |
| OLIGO_06603 | AW462994 | NUP62     | 0.3146  | 0.5694 | 0.7102  | 0.1715 | 0.2741  | 0.5191 | 0.0836  | 0.8223 |
| OLIGO_06708 | AW462998 | C6orf129  | 0.0963  | 0.7983 | 0.1035  | 0.7756 | 0.2338  | 0.4296 | -0.0936 | 0.7167 |
| OLIGO_08456 | AW463001 | TSCOT     | -0.0088 | 0.9820 | 0.1749  | 0.6301 | 0.0334  | 0.9119 | 0.6820  | 0.0102 |
| OLIGO_09114 | AW463002 | P117      | 0.3878  | 0.2615 | -0.4845 | 0.1335 | 0.3240  | 0.2323 | 0.0420  | 0.8592 |
| OLIGO_08872 | AW463008 | UBE2N     | 0.0881  | 0.7464 | -0.0935 | 0.7136 | -0.5982 | 0.0054 | -0.4150 | 0.0270 |
| OLIGO_08252 | AW463009 | MIF       | -0.5453 | 0.3209 | 0.5440  | 0.2897 | -1.2512 | 0.0038 | -1.0708 | 0.0047 |
| OLIGO_03734 | AW463013 | CCDC12    | 0.3718  | 0.4142 | -0.7649 | 0.1497 | 0.4344  | 0.3619 | 0.2851  | 0.4932 |
| OLIGO_10870 | AW463019 | LOC618700 | 0.0954  | 0.7185 | 0.2671  | 0.2807 | 0.1941  | 0.3502 | 0.0240  | 0.8955 |
| OLIGO_08650 | AW463027 | C11orf73  | -0.1532 | 0.7522 | 0.0072  | 0.9873 | 0.2975  | 0.4340 | 0.0608  | 0.8549 |
| OLIGO_09119 | AW463031 | STK10     | 0.9265  | 0.0543 | 0.2316  | 0.5396 | 0.0803  | 0.8174 | 0.1565  | 0.6448 |
| OLIGO_09169 | AW463032 | SITPEC    | 0.4103  | 0.2556 | -0.4122 | 0.2221 | 0.1917  | 0.4978 | 0.2918  | 0.2387 |
| OLIGO_08780 | AW463035 | STARD7    | 0.3711  | 0.1153 | -0.4169 | 0.0586 | -0.3504 | 0.0583 | -0.4395 | 0.0068 |
| OLIGO_11431 | AW463043 | OBFC2A    | 0.7225  | 0.1276 | -1.1028 | 0.0130 | 1.1652  | 0.0018 | 1.2544  | 0.0001 |
| OLIGO_08822 | AW463046 | KIAA1704  | -0.2854 | 0.6222 | 1.0632  | 0.0501 | -2.0335 | 0.0000 | -1.3581 | 0.0007 |
| OLIGO_08860 | AW463047 | WDR51A    | 0.3113  | 0.3220 | -0.1812 | 0.5366 | -0.5233 | 0.0346 | -0.5030 | 0.0202 |
| OLIGO_03984 | AW463048 | OSGEP     | 0.0187  | 0.9483 | -0.5948 | 0.0263 | -0.6026 | 0.0078 | -0.6850 | 0.0005 |
| OLIGO_08722 | AW463051 | FH        | -0.1825 | 0.6863 | -0.2189 | 0.6026 | -0.2129 | 0.5516 | -0.5940 | 0.0565 |

|             |          |           |         |        |         |        |         |        |         |        |
|-------------|----------|-----------|---------|--------|---------|--------|---------|--------|---------|--------|
| OLIGO_08718 | AW463052 | HSPC111   | 0.6581  | 0.0615 | -0.6786 | 0.0393 | 0.0540  | 0.8444 | -0.3018 | 0.2108 |
| OLIGO_06833 | AW463054 | LOC553158 | 1.0268  | 0.0861 | -1.0213 | 0.0696 | 2.1849  | 0.0000 | 1.5811  | 0.0001 |
| OLIGO_03983 | AW463057 | NQO1      | 0.1491  | 0.7064 | 0.1204  | 0.7449 | 0.3145  | 0.3107 | -0.2774 | 0.3071 |
| OLIGO_01976 | AW463060 | CAST      | -0.3924 | 0.3335 | 0.3358  | 0.3762 | -0.4332 | 0.1733 | -0.2686 | 0.3346 |
| OLIGO_08729 | AW463061 | DREV1     | -0.5628 | 0.1693 | 0.8515  | 0.0254 | -0.8976 | 0.0060 | -0.4043 | 0.1507 |
| OLIGO_11433 | AW463062 | KIAA0194  | -0.1389 | 0.6498 | -0.0592 | 0.8404 | 0.4602  | 0.1340 | 0.2884  | 0.3049 |
| OLIGO_03899 | AW463063 | SPINT1    | -0.4306 | 0.6324 | -0.2440 | 0.7556 | 2.9842  | 0.0402 | 2.2524  | 0.1124 |
| OLIGO_07452 | AW463065 | HSA277841 | 0.4102  | 0.4460 | -0.5316 | 0.2911 | 0.3096  | 0.4637 | -0.1022 | 0.7842 |
| OLIGO_08789 | AW463067 | PPP2R2A   | 0.4477  | 0.0399 | -0.2380 | 0.2395 | -0.3552 | 0.0393 | -0.3263 | 0.0301 |
| OLIGO_07944 | AW463070 | RPS6KB1   | 0.5848  | 0.3670 | -0.2447 | 0.6863 | 0.6053  | 0.2347 | 0.4293  | 0.3418 |
| OLIGO_09131 | AW463075 | C1orf61   | 2.0619  | 0.0000 | -1.8506 | 0.0000 | -0.7318 | 0.0335 | -0.8140 | 0.0066 |
| OLIGO_03563 | AW463077 | RBM9      | -0.0296 | 0.9724 | 0.0779  | 0.9251 | -0.1505 | 0.8507 | -0.3530 | 0.6489 |
| OLIGO_10547 | AW463080 | PFN1      | 0.9146  | 0.0653 | -0.9185 | 0.0478 | -0.3455 | 0.3738 | -0.2771 | 0.4153 |
| OLIGO_11430 | AW463084 | ICF45     | -0.6694 | 0.0430 | 0.0210  | 0.9457 | -0.2113 | 0.4144 | -0.3935 | 0.0840 |
| OLIGO_03735 | AW463087 | COQ2      | 1.1741  | 0.0001 | -1.6260 | 0.0000 | -0.4793 | 0.0460 | -0.3834 | 0.0661 |
| OLIGO_08610 | AW463090 | DDIT3     | -0.4237 | 0.1590 | 0.4232  | 0.1325 | 0.1260  | 0.5927 | 0.0451  | 0.8268 |
| OLIGO_09022 | AW463092 | MTA3      | 0.6491  | 0.1539 | -1.6986 | 0.0001 | 1.7531  | 0.0000 | 1.0625  | 0.0007 |
| OLIGO_07455 | AW463093 | IPO8      | -0.4127 | 0.0984 | 0.1154  | 0.6194 | -0.4940 | 0.0124 | -0.2279 | 0.1840 |
| OLIGO_03736 | AW463094 | BRAF      | 0.2900  | 0.4891 | -0.1558 | 0.6943 | 0.5421  | 0.0960 | 0.4465  | 0.1173 |
| OLIGO_07752 | AW463097 | XBP1      | 0.0156  | 0.9639 | -0.2098 | 0.5151 | 0.2481  | 0.3610 | 0.2812  | 0.2512 |
| OLIGO_06545 | AW463099 | RPL19     | -0.2466 | 0.7314 | -0.1723 | 0.7976 | -1.0421 | 0.0647 | -1.1072 | 0.0251 |
| OLIGO_10671 | AW463103 | CLTC      | 0.4871  | 0.4502 | -1.6766 | 0.0046 | 0.1030  | 0.8408 | 0.1732  | 0.6886 |
| OLIGO_08979 | AW463108 | PAGE4     | 0.3641  | 0.5120 | -0.1072 | 0.8364 | 0.0814  | 0.8515 | 0.3732  | 0.3274 |
| OLIGO_09145 | AW463110 | FLJ22624  | -0.0407 | 0.8915 | 0.1215  | 0.6634 | 0.1109  | 0.6406 | -0.0216 | 0.9170 |
| OLIGO_11000 | AW463111 | TRIM71    | 0.1523  | 0.8481 | -0.2462 | 0.7503 | -0.0057 | 0.9939 | 0.2743  | 0.7013 |
| OLIGO_03975 | AW463114 | MATN2     | 0.0290  | 0.9701 | 0.4575  | 0.5274 | -2.3660 | 0.0001 | -1.9578 | 0.0003 |
| OLIGO_10460 | AW463116 | PDF       | -0.1039 | 0.8634 | 0.5322  | 0.3462 | 0.8368  | 0.0777 | 0.5751  | 0.1659 |
| OLIGO_08717 | AW463120 | UBE2S     | 0.4266  | 0.2636 | -0.1587 | 0.6563 | -0.4255 | 0.1550 | -0.2975 | 0.2558 |
| OLIGO_08032 | AW463121 | CD151     | 0.4087  | 0.3855 | -0.5697 | 0.1948 | 0.1483  | 0.6862 | 0.5061  | 0.1164 |
| OLIGO_00498 | AW463124 | UBL4A     | -0.3441 | 0.4300 | 0.3754  | 0.3574 | 0.2022  | 0.5540 | -0.0063 | 0.9833 |
| OLIGO_10576 | AW463125 | RPL41     | -0.9606 | 0.0519 | 0.5725  | 0.2148 | -0.8422 | 0.0297 | -1.4423 | 0.0000 |
| OLIGO_08964 | AW463127 | NADSYN1   | -0.9566 | 0.0121 | 1.3831  | 0.0001 | 0.6525  | 0.0288 | 0.5863  | 0.0249 |
| OLIGO_06906 | AW463130 | KRIT1     | -0.0718 | 0.8508 | 0.6038  | 0.0912 | -0.7746 | 0.0099 | -0.7673 | 0.0035 |
| OLIGO_08315 | AW463132 | C6orf130  | -0.1948 | 0.5009 | 0.2906  | 0.2806 | -0.3478 | 0.1331 | -0.3985 | 0.0485 |

|             |          |           |         |        |         |        |         |        |         |        |
|-------------|----------|-----------|---------|--------|---------|--------|---------|--------|---------|--------|
| OLIGO_03979 | AW463134 | SPTLC1    | 0.5539  | 0.2173 | -0.9011 | 0.0586 | 0.0965  | 0.8030 | 0.1710  | 0.6453 |
| OLIGO_09055 | AW463139 | WDR17     | -1.8795 | 0.0002 | 2.1643  | 0.0000 | 0.1081  | 0.7869 | -0.0132 | 0.9702 |
| OLIGO_03986 | AW463142 | PIGC      | 0.1448  | 0.7555 | -0.8249 | 0.0934 | -0.3096 | 0.4814 | -0.0723 | 0.8612 |
| OLIGO_03977 | AW463143 | ATP5L     | 0.0138  | 0.9611 | -0.5899 | 0.0246 | -0.7865 | 0.0005 | -0.5854 | 0.0026 |
| OLIGO_11496 | AW463149 | LASS2     | 0.1433  | 0.4942 | -0.4772 | 0.0141 | -0.2401 | 0.1505 | 0.0400  | 0.7796 |
| OLIGO_03978 | AW463151 | ALG2      | 0.4154  | 0.3277 | -1.0261 | 0.0526 | 0.3846  | 0.3426 | 0.4308  | 0.3227 |
| OLIGO_08998 | AW463156 | ZFP36L2   | -0.2035 | 0.7079 | 0.5483  | 0.2733 | -0.1420 | 0.7202 | -0.1001 | 0.7729 |
| OLIGO_07133 | AW463160 | BAZ1B     | -0.1878 | 0.3932 | 0.3164  | 0.1235 | -0.1261 | 0.4667 | -0.2566 | 0.0900 |
| OLIGO_09177 | AW463162 | TAF7      | 0.0579  | 0.8647 | 0.2863  | 0.3662 | -0.7196 | 0.0076 | -0.3603 | 0.1237 |
| OLIGO_09127 | AW463165 | RBP4      | -2.7648 | 0.0000 | 2.5844  | 0.0000 | 1.1528  | 0.0092 | 0.5314  | 0.1690 |
| OLIGO_08715 | AW463167 | C20orf43  | 0.7683  | 0.0896 | -1.0523 | 0.0306 | -0.0788 | 0.8253 | 0.1257  | 0.7113 |
| OLIGO_11023 | AW463169 | MIF4GD    | 0.5332  | 0.1498 | -0.5782 | 0.1192 | -0.4632 | 0.1894 | -0.1605 | 0.5847 |
| OLIGO_03738 | AW463171 | APTX      | -0.0060 | 0.9949 | -0.1454 | 0.8748 | 2.3810  | 0.0171 | 1.9033  | 0.0429 |
| OLIGO_10841 | AW463172 | WDR45     | 0.6993  | 0.1724 | -1.2322 | 0.0286 | -0.3584 | 0.4270 | 0.1245  | 0.7651 |
| OLIGO_11432 | AW463174 | C20orf45  | 0.0781  | 0.8509 | -0.8788 | 0.0594 | 0.3077  | 0.4254 | 0.3619  | 0.3391 |
| OLIGO_11272 | AW463176 | FBLN2     | 1.0209  | 0.1638 | -1.8864 | 0.0064 | 0.7876  | 0.1703 | 0.9143  | 0.0693 |
| OLIGO_03985 | AW463182 | TEX2      | -0.7737 | 0.0057 | 0.6214  | 0.0161 | -0.7870 | 0.0004 | -0.5646 | 0.0035 |
| OLIGO_03302 | AW463187 | RPIA      | 1.1691  | 0.0001 | -1.3100 | 0.0000 | -0.9156 | 0.0001 | -0.6877 | 0.0009 |
| OLIGO_10740 | AW463190 | CDV3      | -0.1501 | 0.7597 | -0.0477 | 0.9172 | -0.5040 | 0.1906 | -0.3664 | 0.2770 |
| OLIGO_08467 | AW463194 | ELK4      | 0.4388  | 0.1617 | -0.1716 | 0.5581 | -0.1587 | 0.5189 | -0.1192 | 0.5834 |
| OLIGO_10892 | AW463195 | PRRT3     | -0.6603 | 0.1145 | 1.1809  | 0.0026 | -0.1008 | 0.7581 | -0.0055 | 0.9847 |
| OLIGO_11307 | AW463197 | RERE      | -1.1702 | 0.0116 | 1.4509  | 0.0008 | -0.9846 | 0.0072 | -0.7007 | 0.0278 |
| OLIGO_08468 | AW463203 | CCDC68    | 2.0597  | 0.0000 | -2.9797 | 0.0000 | 0.4582  | 0.2309 | 0.2592  | 0.4318 |
| OLIGO_08475 | AW463204 | WBP4      | 0.0168  | 0.9649 | -0.9291 | 0.0704 | -0.2350 | 0.5215 | -0.2335 | 0.5211 |
| OLIGO_08470 | AW463210 | PLAUR     | -0.9708 | 0.0127 | 1.1130  | 0.0022 | 0.5905  | 0.0574 | 0.6235  | 0.0214 |
| OLIGO_03742 | AW463212 | DIP13B    | -0.4274 | 0.2163 | 0.1314  | 0.6829 | 0.1942  | 0.4764 | 0.3011  | 0.2051 |
| OLIGO_03743 | AW463219 | MGC137697 | -0.0556 | 0.8877 | 0.1976  | 0.5915 | 0.5949  | 0.0545 | 0.4052  | 0.1357 |
| OLIGO_11376 | AW463226 | C5orf15   | 0.4202  | 0.2851 | -0.5868 | 0.1108 | -0.1801 | 0.5587 | 0.1389  | 0.6065 |
| OLIGO_03744 | AW463227 | GNG12     | -0.0995 | 0.8303 | -0.1353 | 0.7548 | 1.1904  | 0.0012 | 1.2046  | 0.0002 |
| OLIGO_09235 | AW463229 | C17orf81  | 0.3865  | 0.3299 | -0.2002 | 0.5975 | -0.1433 | 0.6907 | -0.0171 | 0.9602 |
| OLIGO_09471 | AW463237 | SFRS1     | 0.2194  | 0.5491 | -0.2229 | 0.5154 | -0.5022 | 0.0807 | -0.2849 | 0.2572 |
| OLIGO_09643 | AW463241 | TNFRSF12A | -0.0959 | 0.8546 | -0.0832 | 0.8649 | 0.1874  | 0.6477 | 0.1955  | 0.5862 |
| OLIGO_09287 | AW463243 | TMEM51    | 0.4953  | 0.1219 | -0.5858 | 0.0506 | 0.2039  | 0.4160 | 0.3119  | 0.1557 |
| OLIGO_08710 | AW463245 | BAIAP2    | 0.0256  | 0.9255 | -0.1022 | 0.6893 | 0.1002  | 0.6397 | 0.0926  | 0.6214 |

|             |          |           |         |        |         |        |         |        |         |        |
|-------------|----------|-----------|---------|--------|---------|--------|---------|--------|---------|--------|
| OLIGO_09478 | AW463247 | ATP6V1D   | 0.5080  | 0.2655 | -1.4236 | 0.0009 | -0.2288 | 0.5221 | -0.0932 | 0.7658 |
| OLIGO_09609 | AW463251 | GALNT3    | 1.1887  | 0.0016 | -0.9773 | 0.0055 | 1.0052  | 0.0007 | 0.8042  | 0.0019 |
| OLIGO_08483 | AW463256 | HIC2      | 0.1107  | 0.8829 | -0.8101 | 0.2783 | 2.8257  | 0.0079 | 1.8425  | 0.0412 |
| OLIGO_03748 | AW463258 | PPP1R15B  | 0.3559  | 0.5184 | 0.2594  | 0.6177 | 0.0153  | 0.9738 | -0.0184 | 0.9665 |
| OLIGO_09591 | AW463262 | LOC56902  | 0.3036  | 0.3188 | -0.4697 | 0.1021 | -0.0064 | 0.9787 | -0.1791 | 0.3915 |
| OLIGO_08365 | AW463268 | ELF3      | 0.5649  | 0.2523 | -0.2610 | 0.5698 | 0.7803  | 0.1151 | 0.3279  | 0.4362 |
| OLIGO_10572 | AW463272 | ATP6V1F   | -0.0002 | 0.9997 | 0.7256  | 0.0943 | 0.4037  | 0.2671 | 0.0964  | 0.7642 |
| OLIGO_10936 | AW463280 | RPL5      | 0.8754  | 0.1106 | -0.4947 | 0.3164 | 0.2854  | 0.5210 | 0.3515  | 0.4213 |
| OLIGO_03749 | AW463281 | CCDC64    | 0.3616  | 0.2295 | 0.1956  | 0.4868 | 0.3771  | 0.1103 | 0.1276  | 0.5365 |
| OLIGO_11498 | AW463286 | TBC1D17   | 0.1943  | 0.6040 | -0.3810 | 0.3033 | 0.3283  | 0.3393 | 0.2179  | 0.4894 |
| OLIGO_00541 | AW463287 | ANAPC2    | -0.6109 | 0.0939 | 0.5100  | 0.1348 | 0.0703  | 0.8054 | -0.0558 | 0.8233 |
| OLIGO_07804 | AW463291 | USP2      | -1.2656 | 0.0022 | 2.0363  | 0.0000 | -0.5025 | 0.1236 | -0.3127 | 0.2682 |
| OLIGO_09616 | AW463292 | TSC22D1   | -0.4652 | 0.4376 | 0.1081  | 0.8459 | 0.5051  | 0.2783 | 0.4229  | 0.2998 |
| OLIGO_11612 | AW463296 | MSX2P     | 1.5677  | 0.0154 | -2.6725 | 0.0000 | 0.3903  | 0.4399 | 0.5358  | 0.2261 |
| OLIGO_11373 | AW463297 | RAB7      | 0.4509  | 0.3014 | -0.6575 | 0.1074 | -0.5084 | 0.1373 | -0.1718 | 0.5660 |
| OLIGO_08250 | AW463299 | RNF7      | 0.5675  | 0.0675 | -0.6769 | 0.0197 | -1.2845 | 0.0000 | -0.9293 | 0.0000 |
| OLIGO_10636 | AW463305 | TPM4      | 1.1513  | 0.0301 | -1.4853 | 0.0028 | -0.3693 | 0.3736 | 0.2000  | 0.5819 |
| OLIGO_06673 | AW463306 | GOLGB1    | 0.4464  | 0.3648 | -0.8435 | 0.1021 | 0.4911  | 0.2786 | 0.4463  | 0.3154 |
| OLIGO_03745 | AW463308 | THRAP5    | 0.4420  | 0.1627 | -0.0548 | 0.8558 | -0.1386 | 0.5837 | 0.0191  | 0.9296 |
| OLIGO_03746 | AW463310 | FBXO30    | 0.5917  | 0.2280 | 0.5739  | 0.2108 | 1.1896  | 0.0021 | 1.3023  | 0.0001 |
| OLIGO_09529 | AW463314 | NIPSNAP1  | 0.0554  | 0.8890 | -0.3183 | 0.3909 | 0.1263  | 0.6844 | 0.2047  | 0.4520 |
| OLIGO_09561 | AW463315 | C11orf75  | -0.1011 | 0.7431 | -0.1528 | 0.5965 | -0.0550 | 0.8199 | 0.1291  | 0.5420 |
| OLIGO_07143 | AW463319 | HMGCR     | -0.0619 | 0.8460 | -0.1572 | 0.5982 | -0.6976 | 0.0054 | -0.6555 | 0.0029 |
| OLIGO_09444 | AW463323 | SC65      | -0.2124 | 0.6281 | 0.3962  | 0.3342 | -0.0637 | 0.8528 | 0.0430  | 0.8863 |
| OLIGO_08474 | AW463325 | BCCIP     | -0.0169 | 0.9651 | -0.1894 | 0.6011 | 0.0074  | 0.9806 | -0.1060 | 0.6900 |
| OLIGO_02804 | AW463331 | NOB1      | -0.0029 | 0.9937 | -0.3602 | 0.2846 | -0.4670 | 0.0984 | -0.4347 | 0.0790 |
| OLIGO_09498 | AW463332 | PTPN11    | 1.2174  | 0.0185 | -1.1465 | 0.0166 | 0.4218  | 0.2950 | 0.3972  | 0.2581 |
| OLIGO_09252 | AW463337 | BPNT1     | -0.6060 | 0.0322 | 0.2351  | 0.3731 | -0.0280 | 0.8992 | 0.2357  | 0.2237 |
| OLIGO_06762 | AW463340 | MGC127123 | 0.2764  | 0.2767 | -1.0700 | 0.0000 | -0.4228 | 0.0364 | -0.0486 | 0.7805 |
| OLIGO_10160 | AW463344 | PRPF8     | 0.0868  | 0.7924 | 0.7373  | 0.0175 | -0.3810 | 0.1499 | -0.2497 | 0.2714 |
| OLIGO_09518 | AW463345 | LAT2      | -0.9307 | 0.1097 | 2.0631  | 0.0002 | -0.6220 | 0.1724 | -0.7489 | 0.0608 |
| OLIGO_09666 | AW463346 | CLDN1     | -0.0608 | 0.9123 | -0.3156 | 0.5402 | 2.5673  | 0.0000 | 2.0037  | 0.0000 |
| OLIGO_10702 | AW463357 | MCM7      | -0.5309 | 0.0549 | 0.5937  | 0.0203 | -0.2620 | 0.2330 | -0.0983 | 0.6017 |
| OLIGO_08477 | AW463359 | PHB       | 0.4749  | 0.1363 | -0.6562 | 0.0273 | -0.6255 | 0.0134 | -0.4089 | 0.0622 |

|             |          |           |         |        |         |        |         |        |         |        |
|-------------|----------|-----------|---------|--------|---------|--------|---------|--------|---------|--------|
| OLIGO_09243 | AW463361 | PTGES     | -0.0357 | 0.9232 | 0.0233  | 0.9464 | -0.0302 | 0.9182 | -0.1591 | 0.5320 |
| OLIGO_08338 | AW463363 | KIAA0323  | -0.4670 | 0.4022 | 0.6627  | 0.2550 | 0.8251  | 0.0122 | 0.0757  | 0.7937 |
| OLIGO_11245 | AW463368 | PC        | 0.3502  | 0.2629 | -0.8973 | 0.0023 | 0.3576  | 0.1449 | 0.0193  | 0.9284 |
| OLIGO_09413 | AW463371 | LPIN1     | -1.1923 | 0.0042 | 1.1561  | 0.0030 | -0.1505 | 0.6486 | -0.2885 | 0.3206 |
| OLIGO_03065 | AW463372 | DHX8      | 0.1763  | 0.7911 | -0.6129 | 0.3250 | -0.8323 | 0.1111 | -0.1755 | 0.7008 |
| OLIGO_09316 | AW463379 | SAFB      | -0.0551 | 0.9158 | -0.1575 | 0.7463 | 0.0038  | 0.9926 | -0.2408 | 0.5010 |
| OLIGO_11273 | AW463384 | NEU1      | 0.4757  | 0.2457 | -0.5819 | 0.1505 | 0.7104  | 0.0820 | 0.6384  | 0.1047 |
| OLIGO_03750 | AW463385 | TAZ       | 0.4462  | 0.2417 | -0.2274 | 0.5232 | -0.1011 | 0.7347 | 0.0658  | 0.8010 |
| OLIGO_11750 | AW463388 | C14orf147 | 1.5299  | 0.0004 | -1.9541 | 0.0000 | 0.1893  | 0.5852 | 0.2143  | 0.4690 |
| OLIGO_08390 | AW463393 | BET1      | 0.0921  | 0.8303 | -0.4775 | 0.2640 | 0.6324  | 0.1358 | 0.4401  | 0.2603 |
| OLIGO_08490 | AW463397 | CAMKK1    | 0.4444  | 0.0399 | -0.1660 | 0.4068 | -0.0414 | 0.8088 | -0.0948 | 0.5217 |
| OLIGO_09707 | AW463398 | IRF6      | 0.5477  | 0.2107 | 0.0527  | 0.8975 | -0.3675 | 0.2841 | -0.1524 | 0.6119 |
| OLIGO_11381 | AW463402 | POR       | 0.1732  | 0.4104 | 0.0558  | 0.7764 | 0.0055  | 0.9736 | -0.0041 | 0.9772 |
| OLIGO_01293 | AW463403 | 40244.00  | 0.5738  | 0.1744 | -0.4499 | 0.2547 | -0.8490 | 0.0112 | -0.3179 | 0.2737 |
| OLIGO_10550 | AW463406 | PAFAH1B3  | -0.0633 | 0.8567 | -0.0561 | 0.8628 | -0.0253 | 0.9257 | -0.0589 | 0.8062 |
| OLIGO_10933 | AW463410 | LRRC32    | -0.3507 | 0.6932 | -0.5010 | 0.5571 | 0.9719  | 0.2461 | 1.7026  | 0.0557 |
| OLIGO_09535 | AW463417 | PDLIM2    | -0.1048 | 0.8233 | 0.1933  | 0.6534 | 0.6421  | 0.0731 | 0.5085  | 0.1049 |
| OLIGO_03752 | AW463421 | EPB41L1   | 0.2393  | 0.5060 | 0.3174  | 0.3455 | -0.3563 | 0.2134 | -0.1499 | 0.5446 |
| OLIGO_00081 | AW463422 | PPIL1     | 0.1578  | 0.6376 | -0.3152 | 0.3131 | -0.1715 | 0.5166 | -0.4521 | 0.0511 |
| OLIGO_08493 | AW463423 | LOC511318 | 1.3605  | 0.0091 | -1.7586 | 0.0003 | 1.2603  | 0.0023 | 0.5963  | 0.0953 |
| OLIGO_03753 | AW463438 | BC002942  | -0.4201 | 0.2901 | -0.0200 | 0.9562 | 0.2433  | 0.3941 | -0.0596 | 0.8109 |
| OLIGO_03754 | AW463450 | ATP6V0E   | 0.1584  | 0.6871 | -0.4931 | 0.1793 | 1.0114  | 0.0012 | 0.9807  | 0.0003 |
| OLIGO_09505 | AW463451 | SLC19A2   | 0.8349  | 0.1048 | -0.8575 | 0.0704 | 0.6975  | 0.0722 | 0.5687  | 0.0940 |
| OLIGO_08494 | AW463458 | UPK1B     | -1.6101 | 0.0155 | 0.8598  | 0.1363 | 1.0606  | 0.0713 | 0.6500  | 0.2067 |
| OLIGO_08495 | AW463465 | D6Wsu163e | -0.1376 | 0.8351 | -0.4304 | 0.5065 | 0.6878  | 0.2850 | 0.3108  | 0.6090 |
| OLIGO_09712 | AW463470 | CNAP1     | -0.3464 | 0.6518 | 0.2164  | 0.7584 | 0.0500  | 0.9301 | -0.1764 | 0.7237 |
| OLIGO_03755 | AW463471 | FAM43A    | 0.4688  | 0.1890 | -0.0970 | 0.7667 | 0.2389  | 0.3554 | -0.0994 | 0.6559 |
| OLIGO_03857 | AW463472 | PRG1      | -0.4205 | 0.6285 | -0.2875 | 0.7235 | 2.8026  | 0.0000 | 2.6311  | 0.0000 |
| OLIGO_03756 | AW463474 | CENPH     | -0.1762 | 0.7865 | -0.3212 | 0.6104 | -0.2059 | 0.7262 | -0.3807 | 0.5045 |
| OLIGO_07391 | AW463476 | VTI1B     | 0.7156  | 0.1878 | -1.1070 | 0.0297 | -0.6252 | 0.1427 | -0.4904 | 0.1891 |
| OLIGO_09682 | AW463479 | C14orf101 | 0.1013  | 0.7783 | 0.2554  | 0.4482 | -0.2897 | 0.3046 | -0.2233 | 0.3660 |
| OLIGO_10588 | AW463480 | LPHN2     | -0.2923 | 0.6003 | -0.5256 | 0.3123 | 1.1353  | 0.0102 | 0.8165  | 0.0338 |
| OLIGO_11056 | AW463481 | DNAJC16   | -0.3952 | 0.6287 | 0.1309  | 0.8625 | -0.5762 | 0.3727 | -0.9425 | 0.0951 |
| OLIGO_08497 | AW463483 | FAM20C    | -0.1951 | 0.7071 | -0.5650 | 0.2274 | -0.0451 | 0.9017 | 0.0888  | 0.7812 |

|             |          |           |         |        |         |        |         |        |         |        |
|-------------|----------|-----------|---------|--------|---------|--------|---------|--------|---------|--------|
| OLIGO_08498 | AW463485 | ELF2      | 0.3945  | 0.2113 | -0.6979 | 0.0177 | -0.3148 | 0.2084 | -0.1791 | 0.4084 |
| OLIGO_11461 | AW463493 | CDC20     | 0.1629  | 0.6104 | -0.8970 | 0.0026 | -0.0036 | 0.9887 | -0.4134 | 0.0600 |
| OLIGO_06781 | AW463495 | MORF4L1   | 0.1967  | 0.6652 | -0.2220 | 0.6015 | -0.1751 | 0.6230 | -0.0648 | 0.8353 |
| OLIGO_03758 | AW463498 | COL7A1    | -0.1359 | 0.7211 | 0.5466  | 0.1274 | 0.5170  | 0.0835 | 0.5971  | 0.0226 |
| OLIGO_09893 | AW463501 | RAB32     | -1.6942 | 0.0000 | 2.3011  | 0.0000 | -0.0345 | 0.9108 | -0.4973 | 0.0661 |
| OLIGO_09791 | AW463507 | DYNC1I2   | 0.3064  | 0.2666 | -0.3652 | 0.1561 | -0.3605 | 0.1021 | -0.0768 | 0.6853 |
| OLIGO_06602 | AW463516 | PRDX2     | 0.3423  | 0.3949 | -0.7639 | 0.0419 | -0.1222 | 0.7008 | -0.4115 | 0.1372 |
| OLIGO_05624 | AW463521 | OAS1      | 0.3435  | 0.7322 | -1.0794 | 0.2723 | -0.9537 | 0.2758 | -0.1965 | 0.8064 |
| OLIGO_03759 | AW463522 | UCHL1     | -0.6103 | 0.2989 | 1.0816  | 0.0491 | -2.3803 | 0.0000 | -2.1944 | 0.0000 |
| OLIGO_09747 | AW463524 | MYL9      | 0.4153  | 0.3647 | -0.2426 | 0.5698 | 0.1316  | 0.7087 | 0.2758  | 0.3713 |
| OLIGO_11114 | AW463528 | C7orf24   | 0.1279  | 0.8163 | -0.5116 | 0.3176 | 2.3984  | 0.0000 | 2.3977  | 0.0000 |
| OLIGO_10810 | AW463531 | FOSL2     | 0.8039  | 0.0588 | -1.2654 | 0.0015 | -0.1524 | 0.6470 | 0.3504  | 0.2294 |
| OLIGO_06843 | AW463539 | LOC546078 | -0.1037 | 0.7991 | 0.1702  | 0.6552 | -0.6260 | 0.0504 | -0.2912 | 0.2978 |
| OLIGO_08407 | AW463541 | MARVELD3  | 0.3603  | 0.4018 | -1.0111 | 0.0122 | 1.4958  | 0.0000 | 0.8218  | 0.0077 |
| OLIGO_03761 | AW463542 | NEK7      | 0.0440  | 0.9061 | -0.0704 | 0.8366 | 0.3794  | 0.1790 | 0.6793  | 0.0060 |
| OLIGO_08499 | AW463544 | PCQAP     | 0.5251  | 0.0047 | -0.2868 | 0.0971 | -0.2001 | 0.1693 | -0.1276 | 0.3150 |
| OLIGO_06699 | AW463557 | ITGB4BP   | 0.0978  | 0.7370 | -0.0954 | 0.7254 | 0.0825  | 0.7187 | -0.2733 | 0.1722 |
| OLIGO_08505 | AW463561 | NAPRT1    | -0.7160 | 0.0446 | 0.8680  | 0.0089 | 0.7659  | 0.0070 | 0.5873  | 0.0210 |
| OLIGO_08463 | AW463564 | TMEM1     | 0.1408  | 0.7722 | 0.4025  | 0.3764 | 0.2385  | 0.5318 | 0.1131  | 0.7349 |
| OLIGO_03764 | AW463565 | C21orf45  | -0.5671 | 0.4336 | 0.6042  | 0.3603 | 0.1183  | 0.8326 | -0.5395 | 0.2846 |
| OLIGO_09849 | AW463573 | DIDO1     | 1.6282  | 0.0717 | -1.2449 | 0.1530 | 0.2114  | 0.7286 | 0.1103  | 0.8494 |
| OLIGO_03765 | AW463585 | FBXO42    | 1.0329  | 0.0856 | -0.1848 | 0.7433 | -0.3626 | 0.4404 | -0.4859 | 0.2379 |
| OLIGO_11020 | AW463586 | CDK2AP1   | -0.2422 | 0.5355 | -0.2937 | 0.4386 | -0.3734 | 0.3229 | 0.3975  | 0.3104 |
| OLIGO_08510 | AW463587 | S100A14   | 0.8606  | 0.0083 | -1.2394 | 0.0001 | 0.3668  | 0.1497 | 0.3300  | 0.1389 |
| OLIGO_03766 | AW463590 | MLLT6     | 0.0092  | 0.9737 | 0.0129  | 0.9602 | -0.0154 | 0.9450 | -0.1159 | 0.5443 |
| OLIGO_03767 | AW463591 | ZMAT5     | 0.3265  | 0.6944 | -0.3050 | 0.7050 | 0.4724  | 0.5465 | 0.0180  | 0.9808 |
| OLIGO_06872 | AW463595 | NEK7      | 0.5114  | 0.3078 | -0.9218 | 0.0497 | -0.2923 | 0.4569 | -0.0113 | 0.9738 |
| OLIGO_10811 | AW463599 | NOS2A     | 0.0107  | 0.9716 | 0.1276  | 0.6489 | 0.4434  | 0.0578 | 0.6740  | 0.0010 |
| OLIGO_09803 | AW463615 | MLLT4     | -0.4257 | 0.6463 | 1.2256  | 0.1722 | 0.9836  | 0.2171 | 0.8783  | 0.1961 |
| OLIGO_08515 | AW463620 | PSMF1     | -0.0405 | 0.9305 | -0.2705 | 0.5307 | 0.8773  | 0.0179 | 1.2611  | 0.0001 |
| OLIGO_08516 | AW463624 | SLC25A25  | -0.1223 | 0.7613 | 0.3119  | 0.4075 | 0.4224  | 0.1892 | -0.2803 | 0.3270 |
| OLIGO_10359 | AW463627 | GATAD1    | -0.9982 | 0.0673 | 1.1174  | 0.0286 | 0.2298  | 0.6017 | -0.1841 | 0.6324 |
| OLIGO_08364 | AW463631 | NDUFA1    | 0.3779  | 0.2910 | -0.4753 | 0.1583 | -0.4482 | 0.1102 | -0.5526 | 0.0247 |
| OLIGO_03768 | AW463635 | KIAA1787  | -0.3661 | 0.1999 | 0.4057  | 0.1275 | 0.2674  | 0.2356 | -0.0468 | 0.8113 |

|             |          |           |         |        |         |        |         |        |         |        |
|-------------|----------|-----------|---------|--------|---------|--------|---------|--------|---------|--------|
| OLIGO_11386 | AW463637 | LOC643102 | -0.4612 | 0.4213 | 0.4444  | 0.4074 | -0.1511 | 0.7367 | 0.0579  | 0.8830 |
| OLIGO_03769 | AW463640 | SS18L1    | 0.1254  | 0.6824 | 0.4454  | 0.2235 | -0.3833 | 0.3218 | -0.2945 | 0.3677 |
| OLIGO_03770 | AW463645 | ERG       | 0.1576  | 0.6711 | 0.2250  | 0.5339 | -0.1708 | 0.6188 | 0.1716  | 0.6020 |
| OLIGO_08523 | AW463646 | CXCL16    | -1.3468 | 0.0159 | 1.5208  | 0.0037 | 1.2619  | 0.0040 | 1.1533  | 0.0027 |
| OLIGO_08517 | AW463648 | CDH1      | 1.7988  | 0.0120 | -2.4407 | 0.0003 | 2.9128  | 0.0000 | 2.2531  | 0.0000 |
| OLIGO_03771 | AW463651 | C1orf91   | -0.2865 | 0.3787 | 0.3345  | 0.2719 | 0.4406  | 0.0845 | 0.0631  | 0.7773 |
| OLIGO_11588 | AW463653 | MAFG      | 0.6734  | 0.1233 | -0.7937 | 0.0817 | -0.8811 | 0.0816 | -0.2790 | 0.4324 |
| OLIGO_08518 | AW463654 | MFN2      | 0.2079  | 0.4977 | -0.0404 | 0.8879 | 0.0479  | 0.8428 | 0.0646  | 0.7616 |
| OLIGO_03772 | AW463655 | SPIN1     | 0.6584  | 0.1067 | -0.7518 | 0.0490 | 0.6901  | 0.0312 | 0.4552  | 0.1041 |
| OLIGO_03773 | AW463665 | Pea15     | 0.4993  | 0.4730 | -0.1893 | 0.7761 | 0.2467  | 0.6990 | 0.3411  | 0.5807 |
| OLIGO_07676 | AW463668 | NIFUN     | -0.2525 | 0.5528 | 0.2382  | 0.5492 | 0.1040  | 0.7569 | -0.2165 | 0.4590 |
| OLIGO_03775 | AW463671 | YRDC      | 1.1457  | 0.0003 | -1.0878 | 0.0003 | -0.7568 | 0.0025 | -0.5428 | 0.0130 |
| OLIGO_09291 | AW463677 | RPL5      | 0.4878  | 0.2201 | -0.7982 | 0.0322 | 0.0366  | 0.9065 | 0.0526  | 0.8470 |
| OLIGO_04598 | AW463678 | TMBIM1    | 0.3320  | 0.4444 | -0.2831 | 0.4828 | 0.8207  | 0.0134 | 0.7436  | 0.0113 |
| OLIGO_03776 | AW463683 | LOC51315  | 0.4720  | 0.1543 | -0.2966 | 0.3355 | 0.0751  | 0.7742 | -0.0206 | 0.9278 |
| OLIGO_03777 | AW463689 | BXDC1     | 0.3827  | 0.1662 | -0.7973 | 0.0020 | -0.4484 | 0.0408 | -0.1607 | 0.3970 |
| OLIGO_08527 | AW463694 | ERCC1     | -0.8201 | 0.1589 | 1.0927  | 0.0434 | 0.4370  | 0.3340 | 0.2780  | 0.4824 |
| OLIGO_09872 | AW463695 | TXNL1     | -0.1468 | 0.7492 | 0.3962  | 0.3689 | -0.7146 | 0.0476 | -0.3565 | 0.2726 |
| OLIGO_09123 | AW463696 | GPR107    | -0.1307 | 0.7045 | 0.1667  | 0.6052 | -0.0601 | 0.8242 | -0.0972 | 0.6827 |
| OLIGO_11085 | AW463697 | SOCS1     | -0.1429 | 0.7256 | -0.0463 | 0.9033 | 0.7857  | 0.0141 | 0.1946  | 0.4861 |
| OLIGO_08144 | AW463701 | MKL1      | -0.0756 | 0.7896 | 0.5133  | 0.0536 | -0.6953 | 0.0021 | -0.3860 | 0.0480 |
| OLIGO_03779 | AW463705 | SLC7A7    | 0.0458  | 0.9142 | -0.4198 | 0.2906 | 0.0135  | 0.9677 | 0.2063  | 0.4789 |
| OLIGO_10760 | AW463707 | UBE2D2    | 0.3372  | 0.4907 | -0.7174 | 0.1173 | -0.3979 | 0.2998 | 0.1055  | 0.7542 |
| OLIGO_08529 | AW463709 | CTNS      | 0.2502  | 0.5929 | -0.5085 | 0.2419 | 1.5993  | 0.0000 | 1.4575  | 0.0000 |
| OLIGO_06722 | AW463716 | ZFYVE21   | 0.2497  | 0.4916 | -0.5597 | 0.0998 | 0.0094  | 0.9736 | -0.2772 | 0.2661 |
| OLIGO_08532 | AW463718 | C20orf27  | 0.8822  | 0.0788 | -0.0500 | 0.9172 | 0.4878  | 0.1876 | 0.3169  | 0.3278 |
| OLIGO_03781 | AW463722 | CBLC      | -0.1793 | 0.8606 | 0.0452  | 0.9637 | 1.4854  | 0.1337 | 1.1177  | 0.2328 |
| OLIGO_09092 | AW463727 | RPL7L1    | 0.1820  | 0.7607 | -0.5484 | 0.3267 | -0.6716 | 0.1520 | -0.6013 | 0.1429 |
| OLIGO_08534 | AW463730 | TREX1     | 0.3791  | 0.2571 | -0.0397 | 0.8879 | 0.4012  | 0.2747 | 0.2030  | 0.4795 |
| OLIGO_11761 | AW463734 | DLX1      | 0.8644  | 0.0083 | -1.1398 | 0.0002 | 0.8325  | 0.0014 | 0.6783  | 0.0026 |
| OLIGO_07407 | AW463737 | XYLT2     | 0.5656  | 0.2086 | 0.3785  | 0.3708 | -0.7276 | 0.0392 | -0.9437 | 0.0023 |
| OLIGO_03783 | AW463739 | LSM14A    | 0.6594  | 0.0627 | -0.7545 | 0.0229 | 0.0144  | 0.9585 | 0.0397  | 0.8700 |
| OLIGO_06847 | AW463740 | USP11     | 0.2087  | 0.5918 | 0.1960  | 0.5902 | -0.3269 | 0.2840 | -0.4731 | 0.0769 |
| OLIGO_03784 | AW463747 | HIBCH     | 0.4386  | 0.3399 | -0.8217 | 0.1010 | 0.7629  | 0.1446 | 0.6395  | 0.2247 |

|             |          |           |         |        |         |        |         |        |         |        |
|-------------|----------|-----------|---------|--------|---------|--------|---------|--------|---------|--------|
| OLIGO_00395 | AW463755 | ATP6V0D1  | 0.3821  | 0.2395 | 0.0940  | 0.7564 | 0.4300  | 0.0929 | 0.2237  | 0.3213 |
| OLIGO_10961 | AW463757 | DOCK9     | 1.1408  | 0.0035 | -0.6468 | 0.0827 | 0.1177  | 0.6991 | 0.1168  | 0.6706 |
| OLIGO_06829 | AW463762 | COL5A2    | -3.3797 | 0.0000 | 2.8473  | 0.0000 | 1.5519  | 0.0027 | 1.3129  | 0.0037 |
| OLIGO_03785 | AW463764 | C20orf30  | 0.5801  | 0.0244 | -0.5296 | 0.0280 | -0.6632 | 0.0011 | -0.3012 | 0.0881 |
| OLIGO_08052 | AW463765 | ADAR      | -0.8671 | 0.3038 | 0.3007  | 0.7096 | 1.0728  | 0.1298 | 0.3634  | 0.5772 |
| OLIGO_09171 | AW463774 | ACADVL    | -0.4929 | 0.0980 | 0.9644  | 0.0006 | 0.4501  | 0.0539 | 0.3029  | 0.1381 |
| OLIGO_09240 | AW463777 | Zfp36l2   | 0.2859  | 0.3228 | 0.2070  | 0.4424 | -1.0435 | 0.0000 | -0.6294 | 0.0016 |
| OLIGO_06542 | AW463778 | PRPS1     | 0.8804  | 0.0922 | -1.1165 | 0.0470 | -1.3530 | 0.0564 | -1.3880 | 0.0977 |
| OLIGO_03786 | AW463779 | SIRT7     | 0.4453  | 0.1059 | 0.0096  | 0.9700 | 0.1573  | 0.4620 | -0.0398 | 0.8315 |
| OLIGO_03787 | AW463780 | SLC35B2   | 0.1543  | 0.6771 | -0.0258 | 0.9406 | -0.2095 | 0.4705 | -0.2359 | 0.3534 |
| OLIGO_07128 | AW463787 | SERTAD3   | 2.0506  | 0.0021 | -1.7195 | 0.0059 | -1.2188 | 0.0200 | -0.7118 | 0.1273 |
| OLIGO_07701 | AW463788 | LRP16     | -0.1087 | 0.7952 | 0.6668  | 0.0892 | 0.8395  | 0.0108 | 0.4692  | 0.1030 |
| OLIGO_09477 | AW463790 | LOC618128 | 0.1191  | 0.9012 | -0.2499 | 0.7852 | 3.3483  | 0.0185 | 2.6095  | 0.0446 |
| OLIGO_03788 | AW463791 | SLC41A3   | 0.1573  | 0.6855 | -0.2329 | 0.5385 | 0.5868  | 0.1429 | 0.3349  | 0.3558 |
| OLIGO_08051 | AW463798 | PSMA6     | -0.0012 | 0.9981 | -0.1470 | 0.7571 | -0.1353 | 0.7363 | -0.1554 | 0.6567 |
| OLIGO_08542 | AW463800 | NBR1      | -0.0525 | 0.9009 | 0.1415  | 0.7197 | 0.7458  | 0.0244 | 0.5965  | 0.0396 |
| OLIGO_09887 | AW463803 | SOLH      | -0.1874 | 0.6934 | 0.7312  | 0.1005 | -0.1744 | 0.6405 | -0.0249 | 0.9400 |
| OLIGO_09731 | AW463804 | ZWILCH    | 0.3368  | 0.3229 | -0.5034 | 0.1418 | -0.2106 | 0.4982 | -0.1475 | 0.6175 |
| OLIGO_03789 | AW463807 | EPS15L1   | 0.4112  | 0.5087 | -0.1857 | 0.7575 | 0.5780  | 0.3322 | 0.4348  | 0.4465 |
| OLIGO_09806 | AW463810 | C14orf11  | 0.3498  | 0.3313 | -0.6927 | 0.1139 | 0.0556  | 0.8501 | 0.1896  | 0.5367 |
| OLIGO_07162 | AW463812 | CAT       | -0.5277 | 0.0259 | 0.5717  | 0.0099 | 0.3219  | 0.0830 | 0.0473  | 0.7703 |
| OLIGO_08544 | AW463813 | LOC509687 | -0.5463 | 0.2825 | -0.0617 | 0.8967 | 0.5999  | 0.1324 | 0.2805  | 0.4211 |
| OLIGO_08530 | AW463814 | C17orf25  | 0.2151  | 0.4110 | -0.9070 | 0.0002 | 0.5871  | 0.0049 | 0.1719  | 0.3383 |
| OLIGO_11157 | AW463816 | C8orf36   | 0.2076  | 0.4843 | -0.4625 | 0.0945 | -0.9723 | 0.0000 | -0.6599 | 0.0013 |
| OLIGO_11259 | AW463818 | LOC51035  | 0.1376  | 0.7635 | -0.2811 | 0.5111 | -0.5003 | 0.1632 | -0.6368 | 0.0429 |
| OLIGO_08545 | AW463819 | ZDHHC4    | 0.3438  | 0.2722 | -0.0885 | 0.7625 | 0.4815  | 0.0501 | 0.5240  | 0.0150 |
| OLIGO_09758 | AW463827 | C11orf71  | 0.7321  | 0.0247 | -1.0076 | 0.0010 | 0.9343  | 0.0003 | 0.3720  | 0.1073 |
| OLIGO_07777 | AW463830 | DCTN1     | -0.8326 | 0.0083 | 0.7488  | 0.0108 | 0.3781  | 0.1280 | -0.0916 | 0.6712 |
| OLIGO_05910 | AW463831 | LOC532327 | 0.0061  | 0.9818 | 0.0113  | 0.9642 | 0.6353  | 0.0029 | 0.2931  | 0.1136 |
| OLIGO_08546 | AW463832 | FOSB      | 0.4424  | 0.1046 | -0.2003 | 0.4301 | -0.1330 | 0.5352 | -0.0700 | 0.7082 |
| OLIGO_08820 | AW463838 | LOC124446 | 0.1104  | 0.7570 | 0.5881  | 0.0798 | 0.0164  | 0.9533 | 0.0253  | 0.9180 |
| OLIGO_11388 | AW463843 | LMAN2     | -0.5510 | 0.4667 | 0.3151  | 0.6650 | -0.0671 | 0.9224 | -0.2556 | 0.7003 |
| OLIGO_10365 | AW463844 | MGST2     | 0.7530  | 0.4457 | -0.0690 | 0.9410 | 0.7210  | 0.4316 | 0.5956  | 0.4943 |
| OLIGO_04188 | AW463845 | TOR1B     | 0.2418  | 0.3446 | -0.1232 | 0.6066 | 0.3877  | 0.0545 | 0.1337  | 0.4583 |

|             |          |           |         |        |         |        |         |        |         |        |
|-------------|----------|-----------|---------|--------|---------|--------|---------|--------|---------|--------|
| OLIGO_05970 | AW463849 | RBM22     | -0.0111 | 0.9733 | 0.0091  | 0.9770 | -0.0665 | 0.8164 | -0.0346 | 0.8979 |
| OLIGO_05918 | AW463852 | GIT1      | -0.1955 | 0.4989 | 0.1819  | 0.5012 | -0.1631 | 0.4713 | 0.0704  | 0.7225 |
| OLIGO_08674 | AW463856 | ERGIC3    | -0.1279 | 0.6397 | 0.0238  | 0.9254 | 0.4166  | 0.0546 | 0.4411  | 0.0193 |
| OLIGO_05927 | AW463862 | ROGDI     | 0.1059  | 0.7460 | -0.4624 | 0.1311 | 0.2979  | 0.2455 | 0.3693  | 0.1003 |
| OLIGO_05964 | AW463876 | RNF122    | 0.1908  | 0.3581 | -0.0115 | 0.9526 | -0.2692 | 0.0984 | -0.1329 | 0.3507 |
| OLIGO_05943 | AW463885 | SERPINB9  | -0.2438 | 0.6231 | 0.4670  | 0.2991 | 2.0533  | 0.0000 | 1.4067  | 0.0000 |
| OLIGO_05965 | AW463888 | FARS2     | -0.0452 | 0.8862 | -0.1759 | 0.5523 | 0.0796  | 0.7471 | 0.0290  | 0.8926 |
| OLIGO_08550 | AW463889 | ADAMTSL5  | 0.1788  | 0.5791 | -0.3102 | 0.3415 | 0.5131  | 0.1691 | 0.2549  | 0.4103 |
| OLIGO_03791 | AW463892 | GNPDA2    | 0.3030  | 0.4452 | -0.3104 | 0.4204 | -0.0951 | 0.7840 | -0.1274 | 0.7036 |
| OLIGO_02292 | AW463893 | PTDSR     | 0.6374  | 0.0688 | -1.0281 | 0.0018 | 0.3141  | 0.2518 | 0.1300  | 0.5879 |
| OLIGO_08246 | AW463894 | NDUFC2    | 0.1573  | 0.7472 | -0.1668 | 0.7148 | -1.4216 | 0.0002 | -1.3184 | 0.0001 |
| OLIGO_08293 | AW463895 | NOL7      | 0.6368  | 0.2616 | -1.7446 | 0.0213 | -0.0384 | 0.9362 | 0.0255  | 0.9556 |
| OLIGO_07057 | AW463898 | HSP90B1   | 0.0960  | 0.7391 | -0.1933 | 0.4735 | -0.0190 | 0.9331 | 0.0750  | 0.7045 |
| OLIGO_03793 | AW463908 | ZNF512    | -0.3958 | 0.2435 | 0.1538  | 0.6277 | -0.9669 | 0.0003 | -0.7599 | 0.0012 |
| OLIGO_08259 | AW463910 | DDX6      | -0.0598 | 0.8716 | 0.6173  | 0.1544 | -0.9803 | 0.0940 | -0.8259 | 0.1682 |
| OLIGO_03794 | AW463916 | UBE2Q2    | 0.7785  | 0.0427 | -0.8081 | 0.0239 | 0.6838  | 0.0245 | 0.5580  | 0.0346 |
| OLIGO_05950 | AW463918 | GRN       | 0.1239  | 0.7526 | 0.4052  | 0.2706 | 0.8454  | 0.0064 | 0.6327  | 0.0194 |
| OLIGO_07562 | AW463924 | NDUFA4L2  | -0.6187 | 0.3134 | 0.2706  | 0.6414 | 1.4553  | 0.0281 | 0.9687  | 0.1010 |
| OLIGO_00910 | AW463932 | ELOVL1    | 0.2367  | 0.6021 | -0.5037 | 0.2359 | -0.1727 | 0.6275 | -0.0819 | 0.7926 |
| OLIGO_07001 | AW463933 | AES       | 0.1627  | 0.6290 | 0.4920  | 0.1232 | -0.2173 | 0.4101 | -0.3623 | 0.1171 |
| OLIGO_05925 | AW463938 | RPS19BP1  | 0.5273  | 0.0729 | -1.2208 | 0.0000 | -0.1819 | 0.4343 | -0.1725 | 0.4000 |
| OLIGO_05914 | AW463942 | PHYHD1    | 0.3416  | 0.5069 | 0.3648  | 0.4507 | 0.0249  | 0.9505 | 0.1632  | 0.6458 |
| OLIGO_03795 | AW463943 | TPCN2     | -0.3302 | 0.4464 | 0.1061  | 0.7936 | -0.8152 | 0.0168 | -0.7334 | 0.0140 |
| OLIGO_08551 | AW463944 | KLC4      | -0.1587 | 0.6750 | 0.5088  | 0.1510 | 0.6569  | 0.0272 | 0.3664  | 0.1587 |
| OLIGO_08552 | AW463945 | GABARAPL2 | 0.5546  | 0.2289 | -0.7977 | 0.0916 | -0.4832 | 0.2553 | -0.2203 | 0.5649 |
| OLIGO_05936 | AW463946 | FGD4      | 1.1905  | 0.0065 | -1.3107 | 0.0014 | 0.2455  | 0.4780 | 0.3618  | 0.2268 |
| OLIGO_05953 | AW463947 | OSTF1     | 1.6319  | 0.0126 | -1.5318 | 0.0180 | 0.6934  | 0.1677 | 0.6045  | 0.2191 |
| OLIGO_05960 | AW463948 | STAMBP    | 0.5205  | 0.0336 | -0.2593 | 0.2568 | 0.2558  | 0.1820 | 0.1948  | 0.2455 |
| OLIGO_00261 | AW463949 | TATDN1    | -0.5113 | 0.4922 | 0.4952  | 0.4790 | 0.2915  | 0.6161 | -0.1304 | 0.8031 |
| OLIGO_08553 | AW463950 | C1orf128  | 0.1052  | 0.6945 | -0.3246 | 0.1955 | -0.1196 | 0.5688 | -0.2071 | 0.2602 |
| OLIGO_06748 | AW463952 | DNAJC10   | 0.0736  | 0.8115 | -0.6288 | 0.0292 | 0.0490  | 0.8425 | 0.0819  | 0.6997 |
| OLIGO_01921 | AW463960 | COL12A1   | 0.3541  | 0.6595 | -0.9459 | 0.2097 | 2.7301  | 0.0000 | 2.0928  | 0.0002 |
| OLIGO_03796 | AW463968 | CYFIP2    | -0.8145 | 0.2447 | 0.1772  | 0.7784 | -0.0255 | 0.9656 | -0.1589 | 0.7794 |
| OLIGO_05954 | AW463974 | HHAT      | -0.0365 | 0.8940 | 0.2484  | 0.3323 | 0.1922  | 0.3706 | -0.0336 | 0.8582 |

|             |          |           |         |        |         |        |         |        |         |        |
|-------------|----------|-----------|---------|--------|---------|--------|---------|--------|---------|--------|
| OLIGO_02729 | AW463984 | HERPUD1   | 0.4038  | 0.4607 | 0.0612  | 0.9047 | 0.2874  | 0.5029 | 0.2746  | 0.4647 |
| OLIGO_00610 | AW463985 | NOLA1     | 0.3352  | 0.3341 | -1.1506 | 0.0004 | -0.3765 | 0.1730 | -0.2952 | 0.2137 |
| OLIGO_05962 | AW463986 | LOC222699 | 0.2532  | 0.4844 | 0.3390  | 0.3170 | 0.3826  | 0.1779 | 0.1460  | 0.5566 |
| OLIGO_05969 | AW463987 | FIBP      | -0.0046 | 0.9895 | -0.1337 | 0.6858 | 0.3408  | 0.2172 | 0.1788  | 0.4587 |
| OLIGO_08755 | AW463988 | SPA17     | 0.0197  | 0.9620 | 0.1963  | 0.6256 | 0.2863  | 0.4607 | -0.4110 | 0.2831 |
| OLIGO_05948 | AW464001 | PARD3     | 0.1676  | 0.6295 | 0.5305  | 0.1023 | -0.6596 | 0.0164 | -0.4416 | 0.0650 |
| OLIGO_05956 | AW464002 | MRPL22    | 0.0400  | 0.9007 | -0.5895 | 0.0484 | -0.0538 | 0.8324 | -0.2448 | 0.2686 |
| OLIGO_06931 | AW464007 | PRR13     | 0.1608  | 0.7330 | -0.1618 | 0.7151 | 0.6867  | 0.0634 | 0.5221  | 0.1068 |
| OLIGO_05941 | AW464009 | MED28     | 0.2689  | 0.3542 | -0.0488 | 0.8572 | -0.2887 | 0.2046 | -0.4731 | 0.0178 |
| OLIGO_11212 | AW464011 | UCKL1     | -0.5155 | 0.0748 | 0.8047  | 0.0029 | 0.1819  | 0.4271 | 0.0651  | 0.7427 |
| OLIGO_02798 | AW464012 | MARCKSL1  | 0.1488  | 0.7733 | -0.8053 | 0.0953 | -0.1020 | 0.8020 | -0.4913 | 0.1668 |
| OLIGO_05973 | AW464013 | LOC162427 | 0.1942  | 0.5713 | -0.3809 | 0.2803 | -0.0261 | 0.9287 | 0.2358  | 0.4688 |
| OLIGO_05978 | AW464015 | DHDDS     | 0.4998  | 0.1093 | -0.2972 | 0.3042 | 0.1358  | 0.5756 | 0.2301  | 0.2785 |
| OLIGO_05919 | AW464016 | SAPS1     | 0.5270  | 0.0094 | -0.5141 | 0.0065 | 0.3456  | 0.0309 | 0.1769  | 0.2029 |
| OLIGO_05938 | AW464019 | NUDT19    | -0.3322 | 0.6757 | -0.5635 | 0.4474 | -0.1156 | 0.8512 | -0.2987 | 0.5799 |
| OLIGO_09013 | AW464021 | RYK       | 0.3415  | 0.3659 | 0.0911  | 0.7964 | -0.2002 | 0.4991 | 0.0725  | 0.7799 |
| OLIGO_11703 | AW464026 | CANT1     | -0.4490 | 0.1674 | -0.5643 | 0.0638 | 0.7623  | 0.0029 | 0.8653  | 0.0001 |
| OLIGO_05920 | AW464027 | CENPB     | -0.7089 | 0.0467 | 1.2237  | 0.0003 | 0.3186  | 0.2533 | 0.1030  | 0.6731 |
| OLIGO_08556 | AW464030 | MX1       | -1.2805 | 0.0328 | 1.9951  | 0.0004 | -0.0428 | 0.9273 | 0.0563  | 0.8909 |
| OLIGO_05944 | AW464031 | LPIN3     | -0.4198 | 0.2977 | -0.2463 | 0.5069 | 1.1863  | 0.0002 | 0.4310  | 0.1110 |
| OLIGO_05974 | AW464035 | COMMD4    | -0.1190 | 0.6807 | 0.2635  | 0.3265 | -0.3206 | 0.1669 | -0.4439 | 0.0260 |
| OLIGO_09174 | AW464038 | PRKAG2    | -1.1065 | 0.0026 | 1.0619  | 0.0019 | -0.8482 | 0.0035 | -0.3546 | 0.1578 |
| OLIGO_08557 | AW464044 | RAB33A    | 0.5091  | 0.3200 | -0.1533 | 0.7533 | -0.0335 | 0.9332 | 0.0004  | 0.9992 |
| OLIGO_11041 | AW464049 | PLEKHA1   | 0.0338  | 0.9478 | -0.3704 | 0.4660 | 0.5542  | 0.2841 | -0.2919 | 0.5320 |
| OLIGO_05958 | AW464052 | PPP1R12A  | 0.1235  | 0.8261 | -0.4937 | 0.3764 | 0.0105  | 0.9838 | -0.0931 | 0.8513 |
| OLIGO_10794 | AW464053 | PRL       | -0.1733 | 0.7515 | 0.1933  | 0.7057 | -0.0338 | 0.9371 | 0.1415  | 0.7062 |
| OLIGO_03799 | AW464057 | CFLAR     | 0.0716  | 0.8805 | 0.0697  | 0.8748 | 1.3923  | 0.0003 | 1.4169  | 0.0000 |
| OLIGO_10570 | AW464060 | RPL12     | 0.2910  | 0.5928 | -0.2348 | 0.6445 | -0.9073 | 0.0338 | -0.9462 | 0.0115 |
| OLIGO_05946 | AW464062 | MRPL45    | -0.2403 | 0.4707 | 0.5082  | 0.1117 | -0.6603 | 0.0120 | -0.2452 | 0.2821 |
| OLIGO_11466 | AW464067 | BRD1      | 0.3752  | 0.0993 | -0.1744 | 0.4081 | -0.5752 | 0.0015 | -0.3461 | 0.0269 |
| OLIGO_11049 | AW464068 | POLR2E    | 0.0034  | 0.9913 | 0.3137  | 0.2747 | -0.6305 | 0.0146 | -0.4310 | 0.0481 |
| OLIGO_01257 | AW464069 | BMSC-MCP  | 0.8214  | 0.0021 | -0.4883 | 0.0481 | -0.5048 | 0.0168 | -0.3240 | 0.0759 |
| OLIGO_07881 | AW464074 | SNRPD3    | 0.4840  | 0.1153 | -0.4431 | 0.1238 | 0.0755  | 0.7555 | -0.2002 | 0.3429 |
| OLIGO_09305 | AW464075 | SELS      | 0.6985  | 0.0308 | -0.3138 | 0.3013 | 0.3467  | 0.1705 | 0.2240  | 0.3115 |

|             |          |           |         |        |         |        |         |        |         |        |
|-------------|----------|-----------|---------|--------|---------|--------|---------|--------|---------|--------|
| OLIGO_05952 | AW464080 | PER2      | -0.3014 | 0.2623 | 0.6945  | 0.0059 | 0.4830  | 0.0229 | 0.3972  | 0.0320 |
| OLIGO_08416 | AW464089 | TMEM127   | 0.2988  | 0.6846 | -0.5739 | 0.4043 | -0.7413 | 0.1989 | -0.3418 | 0.4983 |
| OLIGO_12370 | AW464095 | ACTR3     | 1.0533  | 0.0282 | -1.4522 | 0.0013 | -0.3779 | 0.3138 | 0.1321  | 0.6874 |
| OLIGO_05926 | AW464100 | TMEM41B   | 0.8625  | 0.0380 | -0.9901 | 0.0285 | -0.7512 | 0.0955 | -0.6088 | 0.1770 |
| OLIGO_10361 | AW464101 | CHRM2     | -0.0585 | 0.9482 | 0.0374  | 0.9646 | -0.8838 | 0.2114 | -1.1138 | 0.0724 |
| OLIGO_09328 | AW464103 | C14orf172 | 0.2507  | 0.4070 | -0.3126 | 0.2642 | 0.1830  | 0.4466 | 0.0470  | 0.8203 |
| OLIGO_08965 | AW464106 | E4F1      | -0.6933 | 0.0496 | 1.3052  | 0.0001 | 0.1610  | 0.5599 | 0.0229  | 0.9245 |
| OLIGO_05915 | AW464108 | GGTLA1    | 0.5458  | 0.2956 | -0.7213 | 0.1367 | -0.5976 | 0.1408 | -0.4673 | 0.1883 |
| OLIGO_05961 | AW464116 | LENG1     | -0.0587 | 0.8965 | -0.1089 | 0.7949 | 1.0209  | 0.0037 | 0.8139  | 0.0082 |
| OLIGO_03802 | AW464118 | DUSP3     | 0.7687  | 0.0770 | -0.5526 | 0.1688 | -0.4463 | 0.1963 | -0.2894 | 0.3292 |
| OLIGO_07150 | AW464121 | ATP6V1E1  | 0.5188  | 0.3069 | -1.3582 | 0.0044 | -0.4341 | 0.2753 | -0.4563 | 0.1903 |
| OLIGO_05955 | AW464125 | DENND1A   | 0.1387  | 0.8051 | -0.1525 | 0.7651 | 0.7839  | 0.2189 | -0.0475 | 0.9135 |
| OLIGO_05917 | AW464128 | VDP       | 0.4764  | 0.2408 | -0.2741 | 0.4641 | 0.4674  | 0.2352 | 0.3892  | 0.3013 |
| OLIGO_05937 | AW464133 | HAT1      | 0.5698  | 0.1158 | -1.2465 | 0.0002 | 0.2297  | 0.4237 | 0.5613  | 0.0281 |
| OLIGO_05947 | AW464135 | CYCS      | 1.6614  | 0.0000 | -1.2228 | 0.0001 | -0.6986 | 0.0086 | -0.7793 | 0.0008 |
| OLIGO_10063 | AW464141 | RCP9      | 0.7913  | 0.1719 | -0.2337 | 0.6757 | 0.1244  | 0.7835 | 0.1013  | 0.8020 |
| OLIGO_03803 | AW464145 | LOC645781 | -0.2166 | 0.7576 | -0.3349 | 0.6120 | -0.2286 | 0.6776 | -0.3086 | 0.5215 |
| OLIGO_06024 | AW464149 | FNBP1L    | 0.1504  | 0.6975 | -0.3186 | 0.3807 | 0.9521  | 0.0019 | 0.7689  | 0.0044 |
| OLIGO_11178 | AW464151 | MLLT10    | 0.5609  | 0.2427 | -0.5690 | 0.2310 | -0.5874 | 0.2414 | -0.1619 | 0.6735 |
| OLIGO_09961 | AW464152 | GALNT6    | -0.2462 | 0.7287 | 0.1090  | 0.8731 | 1.4855  | 0.1615 | 1.1147  | 0.2611 |
| OLIGO_05982 | AW464154 | PDIA3     | 0.5751  | 0.3846 | -0.7735 | 0.2113 | 0.1099  | 0.8319 | 0.1888  | 0.6772 |
| OLIGO_03804 | AW464155 | SMARCAL1  | -0.4055 | 0.4707 | 0.1876  | 0.7237 | 1.0574  | 0.0126 | 0.6441  | 0.0818 |
| OLIGO_06025 | AW464161 | COPS4     | 0.0832  | 0.8182 | -1.4936 | 0.0000 | 0.2033  | 0.4793 | 0.5503  | 0.0274 |
| OLIGO_07037 | AW464165 | BAT1      | -0.1015 | 0.7624 | -0.2320 | 0.4602 | -0.3541 | 0.1789 | -0.4867 | 0.0351 |
| OLIGO_08778 | AW464166 | HIST1H1D  | -0.6313 | 0.1108 | -0.3194 | 0.3877 | 0.2498  | 0.4213 | -0.0430 | 0.8760 |
| OLIGO_07246 | AW464174 | DDX21     | 0.2737  | 0.4622 | -1.1381 | 0.0116 | -0.7921 | 0.0522 | -0.8171 | 0.0491 |
| OLIGO_07052 | AW464185 | GNAI1     | -0.2670 | 0.4366 | 0.2836  | 0.3763 | 1.2122  | 0.0000 | 1.0991  | 0.0000 |
| OLIGO_06003 | AW464194 | PAN3      | 0.8630  | 0.0155 | -0.7186 | 0.0308 | -0.4819 | 0.0844 | -0.1711 | 0.4828 |
| OLIGO_06014 | AW464195 | FSTL3     | -0.5546 | 0.3843 | 0.4854  | 0.4155 | -1.8270 | 0.0003 | -1.4532 | 0.0010 |
| OLIGO_03806 | AW464202 | PPP3CC    | 0.2386  | 0.4860 | -0.3778 | 0.2385 | -0.5764 | 0.0321 | -0.5040 | 0.0324 |
| OLIGO_03807 | AW464204 | LOC653256 | 0.4606  | 0.1181 | -0.6525 | 0.0181 | -0.1259 | 0.5852 | 0.0181  | 0.9287 |
| OLIGO_06015 | AW464206 | MOBK1A    | 0.0807  | 0.8254 | 0.5632  | 0.1002 | 0.2452  | 0.4013 | 0.3611  | 0.1527 |
| OLIGO_09993 | AW464210 | DPP4      | -0.7070 | 0.2855 | 1.0154  | 0.0935 | 2.1933  | 0.0000 | 1.6023  | 0.0003 |
| OLIGO_05983 | AW464222 | MGC13017  | -0.7394 | 0.1698 | 0.5865  | 0.2442 | -0.8383 | 0.0473 | -0.8480 | 0.0220 |

|             |          |           |         |        |         |        |         |        |         |        |
|-------------|----------|-----------|---------|--------|---------|--------|---------|--------|---------|--------|
| OLIGO_10921 | AW464223 | ATP5J     | -0.5362 | 0.0231 | -0.1121 | 0.6107 | -0.2106 | 0.2538 | -0.0262 | 0.8712 |
| OLIGO_05985 | AW464234 | BMP7      | -0.5980 | 0.1729 | 0.7280  | 0.0761 | 0.7132  | 0.0387 | 0.5694  | 0.0589 |
| OLIGO_09626 | AW464244 | SLC11A1   | 0.0991  | 0.8466 | 0.0365  | 0.9381 | 0.1144  | 0.7697 | 0.5719  | 0.0952 |
| OLIGO_03810 | AW464245 | TOPBP1    | 0.3810  | 0.4709 | -0.6085 | 0.2448 | -0.8485 | 0.1263 | -0.5443 | 0.2710 |
| OLIGO_05987 | AW464246 | LOC389895 | 0.4074  | 0.5282 | 0.0201  | 0.9733 | 0.0359  | 0.9482 | -0.2361 | 0.6629 |
| OLIGO_10007 | AW464253 | DUSP16    | 0.9164  | 0.0036 | -0.7867 | 0.0073 | 0.2271  | 0.3573 | 0.3842  | 0.0748 |
| OLIGO_10908 | AW464255 | KIAA0265  | -0.1054 | 0.7193 | -0.4465 | 0.1013 | 0.5866  | 0.0121 | 0.6345  | 0.0017 |
| OLIGO_11394 | AW464260 | PEPT1     | 1.8922  | 0.0086 | -1.8884 | 0.0050 | 1.3897  | 0.0142 | 1.1333  | 0.0219 |
| OLIGO_09931 | AW464263 | PPP1R13L  | 0.4134  | 0.5517 | -0.0076 | 0.9910 | 0.6380  | 0.3339 | 0.2840  | 0.6314 |
| OLIGO_10013 | AW464264 | C1QTNF1   | 0.3356  | 0.3502 | -0.2679 | 0.4225 | 0.2074  | 0.4526 | 0.4376  | 0.0676 |
| OLIGO_10109 | AW464265 | STAU1     | 0.4263  | 0.5596 | -0.3227 | 0.6367 | -1.1108 | 0.0529 | -0.6601 | 0.1883 |
| OLIGO_06734 | AW464268 | ACSL6     | 1.8178  | 0.0051 | -2.0417 | 0.0008 | 1.7858  | 0.0005 | 1.3065  | 0.0033 |
| OLIGO_08314 | AW464292 | NDUFB5    | 0.4862  | 0.2711 | -0.5699 | 0.1912 | -0.2851 | 0.4753 | -0.2157 | 0.5695 |
| OLIGO_10194 | AW464294 | MTA2      | -0.4791 | 0.2598 | 0.4265  | 0.2834 | 0.2313  | 0.4881 | -0.1226 | 0.6775 |
| OLIGO_10039 | AW464298 | TNFRSF6B  | 1.2835  | 0.1977 | -1.5241 | 0.1228 | 0.5924  | 0.5004 | 0.3262  | 0.7007 |
| OLIGO_07222 | AW464300 | SLC11A2   | 0.8476  | 0.1092 | -1.0968 | 0.0568 | 0.7915  | 0.1419 | 0.3002  | 0.4725 |
| OLIGO_05986 | AW464301 | TMEM138   | -0.4484 | 0.1031 | 0.7297  | 0.0047 | 0.1961  | 0.3624 | 0.0878  | 0.6413 |
| OLIGO_05993 | AW464303 | LOC654335 | 0.1347  | 0.7446 | -0.3015 | 0.4391 | 0.3584  | 0.2785 | 0.3968  | 0.1630 |
| OLIGO_06030 | AW464306 | DRB1      | 0.3344  | 0.3287 | -0.2603 | 0.4160 | 0.1022  | 0.7031 | -0.2690 | 0.2521 |
| OLIGO_05356 | AW464307 | ATG12     | 0.7784  | 0.0301 | -0.3029 | 0.3658 | -0.2539 | 0.3697 | -0.0775 | 0.7530 |
| OLIGO_05360 | AW464308 | AP2M1     | 0.1504  | 0.8425 | 1.0560  | 0.1547 | -1.2273 | 0.0274 | -0.9279 | 0.0566 |
| OLIGO_10048 | AW464309 | BCL2L1    | 0.4000  | 0.4787 | -0.4601 | 0.4032 | 0.1411  | 0.7722 | 0.4928  | 0.3520 |
| OLIGO_08575 | AW464319 | FANCE     | -0.0122 | 0.9599 | -0.1323 | 0.5811 | 0.1550  | 0.5171 | 0.0010  | 0.9961 |
| OLIGO_09956 | AW464321 | SNX6      | 0.1369  | 0.6203 | -0.5673 | 0.0286 | -0.4985 | 0.0217 | -0.3025 | 0.1111 |
| OLIGO_03815 | AW464330 | ARF5      | 0.7373  | 0.1052 | -0.9355 | 0.0282 | -0.2919 | 0.4125 | -0.3131 | 0.3156 |
| OLIGO_11395 | AW464334 | GPBP1L1   | 0.5505  | 0.1007 | -0.5479 | 0.0807 | 0.2929  | 0.2647 | 0.0692  | 0.7632 |
| OLIGO_10375 | AW464338 | PGRMC2    | 0.8332  | 0.0434 | -1.1731 | 0.0024 | 0.1406  | 0.6635 | 0.1010  | 0.7237 |
| OLIGO_06011 | AW464349 | GDI2      | 0.1938  | 0.6724 | -0.3185 | 0.4575 | -0.5925 | 0.0995 | -0.2096 | 0.5051 |
| OLIGO_03818 | AW464350 | FLJ11795  | 0.2356  | 0.7310 | -0.0450 | 0.9447 | -0.0746 | 0.8970 | 0.4845  | 0.4189 |
| OLIGO_08306 | AW464352 | ID2       | -1.0560 | 0.0091 | 1.2103  | 0.0014 | -0.9619 | 0.0025 | -0.6279 | 0.0236 |
| OLIGO_09974 | AW464353 | FBXO32    | 1.6794  | 0.0932 | -0.0876 | 0.9295 | 0.4511  | 0.3596 | 0.8219  | 0.0648 |
| OLIGO_06837 | AW464354 | RPL10     | 0.0318  | 0.9527 | -0.0520 | 0.9176 | -1.1322 | 0.0074 | -0.9945 | 0.0074 |
| OLIGO_09971 | AW464356 | IMP3      | 0.7084  | 0.0862 | -0.2194 | 0.4953 | -0.0148 | 0.9586 | 0.2822  | 0.4131 |
| OLIGO_06013 | AW464359 | AAK1      | 0.2307  | 0.6241 | -0.1090 | 0.8044 | 0.7253  | 0.0498 | 0.3207  | 0.3210 |

|             |          |          |         |        |         |        |         |        |         |        |
|-------------|----------|----------|---------|--------|---------|--------|---------|--------|---------|--------|
| OLIGO_09981 | AW464363 | NAGK     | 0.4081  | 0.5686 | 0.2667  | 0.6921 | 0.0901  | 0.8725 | 0.0699  | 0.8870 |
| OLIGO_09194 | AW464366 | VGLL1    | 0.1394  | 0.7068 | -0.8600 | 0.0135 | 0.7762  | 0.0086 | 0.3749  | 0.1413 |
| OLIGO_08577 | AW464367 | GJB5     | -0.1221 | 0.8553 | -0.3922 | 0.5497 | 0.5380  | 0.4020 | 0.5731  | 0.3578 |
| OLIGO_06004 | AW464370 | PPP1R9B  | 0.4388  | 0.1878 | -0.3697 | 0.2353 | -0.6390 | 0.0146 | -0.3635 | 0.1119 |
| OLIGO_11159 | AW464375 | C6orf75  | 0.3291  | 0.4426 | -0.6002 | 0.1800 | -0.0731 | 0.8412 | 0.1745  | 0.6237 |
| OLIGO_08579 | AW464382 | DIABLO   | 0.2187  | 0.6125 | -0.2825 | 0.4842 | 0.4281  | 0.2062 | -0.0145 | 0.9608 |
| OLIGO_09995 | AW464384 | ZNF395   | -0.9969 | 0.1285 | 2.0044  | 0.0011 | -1.1940 | 0.0265 | -0.9667 | 0.0438 |
| OLIGO_08012 | AW464387 | WDR13    | -0.7569 | 0.0246 | 1.0364  | 0.0010 | -0.6105 | 0.0226 | -0.3240 | 0.1599 |
| OLIGO_10477 | AW464389 | PRDX4    | -0.6919 | 0.2375 | 0.8436  | 0.1238 | -1.1156 | 0.0153 | -1.1212 | 0.0054 |
| OLIGO_08580 | AW464390 | PXMP4    | 0.5471  | 0.2635 | -0.4743 | 0.3121 | 1.0115  | 0.0619 | 0.9510  | 0.0755 |
| OLIGO_03819 | AW464391 | PDCD7    | 0.1086  | 0.7825 | -0.7231 | 0.0482 | -0.3056 | 0.3184 | -0.2541 | 0.3434 |
| OLIGO_08581 | AW464393 | YKT6     | 0.3462  | 0.1585 | -0.4728 | 0.0392 | 0.2529  | 0.1913 | 0.0552  | 0.7434 |
| OLIGO_09996 | AW464396 | TMCC1    | 0.7544  | 0.1333 | -1.0137 | 0.0430 | -0.4794 | 0.1572 | -0.2139 | 0.4703 |
| OLIGO_03820 | AW464398 | DSC2     | -0.4074 | 0.4837 | -0.4543 | 0.4211 | 0.2764  | 0.5955 | 0.2750  | 0.5804 |
| OLIGO_03821 | AW464399 | C13orf24 | 0.0089  | 0.9882 | -0.4116 | 0.4665 | 0.7204  | 0.1414 | 1.1280  | 0.0082 |
| OLIGO_03822 | AW464400 | Lrrfip1  | -0.0038 | 0.9950 | -0.4531 | 0.4212 | 0.0572  | 0.9035 | 0.2869  | 0.4874 |
| OLIGO_06026 | AW464404 | PFDN6    | 0.3840  | 0.1744 | -0.6661 | 0.0120 | 0.4089  | 0.0651 | 0.1616  | 0.4044 |
| OLIGO_08155 | AW464405 | GLRX     | 1.0823  | 0.0172 | -1.5198 | 0.0003 | 0.6619  | 0.0660 | 0.7807  | 0.0122 |
| OLIGO_10629 | AW464408 | YWHAQ    | 0.3901  | 0.1599 | -0.9455 | 0.0003 | -0.3730 | 0.0895 | -0.4636 | 0.0154 |
| OLIGO_11397 | AW464411 | NPDC1    | -0.6225 | 0.1943 | 0.9713  | 0.0306 | -0.5811 | 0.1225 | -0.4996 | 0.1306 |
| OLIGO_05996 | AW464413 | CCDC47   | 1.2417  | 0.0001 | -1.5418 | 0.0000 | -0.5381 | 0.0299 | -0.3120 | 0.1484 |
| OLIGO_06019 | AW464415 | BRRN1    | -0.3127 | 0.3621 | -0.5629 | 0.0777 | -0.0921 | 0.7348 | -0.0945 | 0.6879 |
| OLIGO_10101 | AW464419 | C3orf60  | -0.1539 | 0.7794 | 0.4884  | 0.3422 | 0.2530  | 0.5569 | -0.0137 | 0.9711 |
| OLIGO_10819 | AW464420 | HIST1H1C | -0.8710 | 0.0985 | 0.2156  | 0.6632 | 0.2813  | 0.4951 | 0.1622  | 0.6531 |
| OLIGO_03159 | AW464423 | ASAHL    | 1.5226  | 0.0051 | -1.7960 | 0.0004 | -0.3246 | 0.4443 | -0.4167 | 0.2622 |
| OLIGO_08586 | AW464427 | SAE1     | 0.1910  | 0.5581 | 0.2719  | 0.3720 | -0.4794 | 0.0623 | -0.3301 | 0.1413 |
| OLIGO_05991 | AW464433 | GLT6D1   | 2.0183  | 0.0001 | -1.8918 | 0.0001 | 1.8290  | 0.0000 | 1.8370  | 0.0000 |
| OLIGO_06021 | AW464436 | FNTA     | 0.0404  | 0.8976 | -0.5677 | 0.0529 | -0.3639 | 0.1459 | 0.1711  | 0.4287 |
| OLIGO_10114 | AW464441 | SLC25A3  | 0.6132  | 0.0808 | -0.9329 | 0.0045 | -0.5044 | 0.0731 | -0.6652 | 0.0060 |
| OLIGO_10553 | AW464442 | COL3A1   | -1.9657 | 0.0925 | 1.4157  | 0.2030 | 1.3449  | 0.2034 | 1.6963  | 0.1073 |
| OLIGO_10566 | AW464444 | JOSD2    | -0.3198 | 0.8082 | -0.3932 | 0.7603 | 0.5632  | 0.6508 | 0.4128  | 0.7336 |
| OLIGO_06005 | AW464447 | HMGCL    | -0.9074 | 0.0428 | 0.0795  | 0.8400 | 0.5660  | 0.0415 | 0.2691  | 0.2639 |
| OLIGO_06022 | AW464448 | COX7A2L  | 0.4214  | 0.1949 | -0.7681 | 0.0118 | -0.6290 | 0.0138 | -0.6667 | 0.0029 |
| OLIGO_06029 | AW464449 | RAB37    | 0.3426  | 0.4056 | -0.3292 | 0.3891 | 0.2778  | 0.3686 | -0.2057 | 0.4469 |

|             |          |           |         |        |         |        |         |        |         |        |
|-------------|----------|-----------|---------|--------|---------|--------|---------|--------|---------|--------|
| OLIGO_01646 | AW464452 | PIGY      | 0.3350  | 0.5499 | -0.6279 | 0.2575 | -1.0289 | 0.0684 | -0.2471 | 0.6311 |
| OLIGO_09153 | AW464455 | MUC1      | -0.1542 | 0.7756 | -0.0944 | 0.8551 | 2.3588  | 0.0045 | 2.1913  | 0.0093 |
| OLIGO_05992 | AW464457 | TMEM14A   | 0.1835  | 0.4309 | -0.2463 | 0.2574 | 0.1421  | 0.4388 | 0.1601  | 0.3177 |
| OLIGO_07281 | AW464468 | FTHL7     | -0.1139 | 0.7394 | -0.1189 | 0.7085 | 0.5850  | 0.0334 | 0.7440  | 0.0017 |
| OLIGO_01512 | AW464469 | ZNF462    | -0.6193 | 0.1404 | 0.8101  | 0.0395 | -0.7151 | 0.0304 | -0.9543 | 0.0011 |
| OLIGO_00166 | AW464473 | UFD1L     | -0.0649 | 0.9380 | 0.2967  | 0.7037 | -0.4361 | 0.5049 | -0.1275 | 0.8238 |
| OLIGO_10380 | AW464482 | SMOC1     | -0.2075 | 0.6998 | 0.2363  | 0.6387 | 0.3609  | 0.3924 | -0.1424 | 0.6997 |
| OLIGO_06010 | AW464491 | UPF2      | 0.5704  | 0.0969 | -0.7543 | 0.0190 | 0.2284  | 0.3968 | 0.4074  | 0.0842 |
| OLIGO_00070 | AW464501 | HPRT1     | -0.3865 | 0.3118 | 0.3393  | 0.3424 | -0.3071 | 0.3093 | -0.5868 | 0.0259 |
| OLIGO_08594 | AW464502 | SRPRB     | -0.0691 | 0.8379 | -0.5795 | 0.0660 | 0.0399  | 0.8813 | 0.0519  | 0.8232 |
| OLIGO_10978 | AW464507 | HECA      | 0.1674  | 0.5495 | 0.2934  | 0.2701 | -0.2741 | 0.2145 | -0.2892 | 0.1322 |
| OLIGO_10280 | AW464509 | EIF3S6    | -0.0184 | 0.9618 | -0.2647 | 0.4609 | -0.4828 | 0.1096 | -0.4355 | 0.1025 |
| OLIGO_10237 | AW464513 | CALML4    | -0.7534 | 0.0154 | 0.8132  | 0.0049 | -0.3287 | 0.1816 | -0.4541 | 0.0348 |
| OLIGO_08590 | AW464517 | LOC522854 | -0.2603 | 0.3402 | 0.3380  | 0.1856 | -0.1853 | 0.3863 | -0.2142 | 0.2527 |
| OLIGO_10223 | AW464522 | GPD1L     | 1.8703  | 0.0000 | -2.5194 | 0.0000 | -0.1697 | 0.5340 | 0.0923  | 0.6940 |
| OLIGO_10232 | AW464523 | C19orf42  | 0.1569  | 0.6838 | -1.0388 | 0.0245 | -0.0408 | 0.9069 | 0.0927  | 0.7810 |
| OLIGO_10598 | AW464527 | MARCKS    | -1.2237 | 0.0003 | 1.0087  | 0.0014 | 0.1523  | 0.5616 | 0.1015  | 0.6584 |
| OLIGO_10278 | AW464530 | OCIAD1    | 0.2223  | 0.5656 | -0.6981 | 0.1133 | -0.2901 | 0.4260 | -0.3705 | 0.3399 |
| OLIGO_10224 | AW464532 | SYNGR2    | -0.7502 | 0.0193 | 1.0601  | 0.0004 | -0.6274 | 0.0131 | -0.5039 | 0.0222 |
| OLIGO_07153 | AW464540 | IGFBP6    | 0.1142  | 0.7626 | 0.1345  | 0.7037 | -0.8773 | 0.0032 | -0.7186 | 0.0058 |
| OLIGO_00369 | AW464544 | NDUFS6    | -0.1513 | 0.5747 | -0.6566 | 0.0087 | -0.5637 | 0.0090 | -0.2772 | 0.1320 |
| OLIGO_10244 | AW464546 | BPY2IP1   | -0.5742 | 0.4167 | 0.5196  | 0.4997 | 1.3821  | 0.0056 | 0.3997  | 0.3405 |
| OLIGO_08591 | AW464548 | CTSK      | -0.1810 | 0.6566 | 0.4497  | 0.2385 | 0.4347  | 0.1773 | 0.2232  | 0.4250 |
| OLIGO_11521 | AW464549 | SEC22B    | 0.1061  | 0.8584 | -0.3999 | 0.4913 | 0.2310  | 0.6748 | 0.5185  | 0.3384 |
| OLIGO_08592 | AW464552 | BTBD10    | -0.1563 | 0.7305 | 0.0660  | 0.8764 | 0.7332  | 0.0397 | 0.4207  | 0.1770 |
| OLIGO_08941 | AW464555 | SCPEP1    | 1.2633  | 0.0340 | -1.6407 | 0.0033 | 2.0554  | 0.0000 | 1.3928  | 0.0007 |
| OLIGO_10246 | AW464557 | ARPC1A    | 0.2013  | 0.3344 | -0.5245 | 0.0070 | -0.2132 | 0.1981 | -0.1847 | 0.1971 |
| OLIGO_08593 | AW464561 | PIK3C2G   | -0.2999 | 0.7607 | 0.0949  | 0.9212 | 3.5511  | 0.0752 | 3.2457  | 0.1210 |
| OLIGO_10217 | AW464562 | HRH1      | 1.0078  | 0.0524 | -1.1708 | 0.0161 | 0.1237  | 0.7608 | 0.0599  | 0.8663 |
| OLIGO_11410 | AW464563 | MRPL17    | 0.1437  | 0.5843 | -0.4504 | 0.1265 | -0.3142 | 0.2500 | -0.2932 | 0.2855 |
| OLIGO_10257 | AW464567 | Samd12    | 0.8726  | 0.1287 | -0.1327 | 0.8013 | 1.1144  | 0.0499 | 0.8550  | 0.1056 |
| OLIGO_03824 | AW464568 | PIAS3     | 0.2298  | 0.5769 | -0.2974 | 0.4428 | 0.4997  | 0.1231 | 0.8674  | 0.0028 |
| OLIGO_03077 | AW464570 | AMZ2      | 0.3832  | 0.3607 | 0.0977  | 0.8031 | -0.5153 | 0.1171 | -0.1444 | 0.6155 |
| OLIGO_10226 | AW464575 | FAF1      | -0.1973 | 0.4764 | 0.2000  | 0.4392 | 0.1039  | 0.6340 | 0.1223  | 0.5207 |

|             |          |           |         |        |         |        |         |        |         |        |
|-------------|----------|-----------|---------|--------|---------|--------|---------|--------|---------|--------|
| OLIGO_10754 | AW464582 | C17orf80  | 0.0173  | 0.9582 | -0.1670 | 0.5925 | 0.5658  | 0.0311 | 0.5642  | 0.0185 |
| OLIGO_10239 | AW464586 | JMJD1B    | 0.2166  | 0.6066 | -0.3636 | 0.3576 | 0.2296  | 0.4824 | 0.2112  | 0.4620 |
| OLIGO_09349 | AW464609 | TM2D2     | 0.2346  | 0.3650 | -0.4746 | 0.0504 | 0.2413  | 0.2345 | 0.2364  | 0.1835 |
| OLIGO_08476 | AW464610 | C11orf52  | -0.8345 | 0.3431 | -0.4272 | 0.5895 | 0.6630  | 0.3868 | 0.2741  | 0.6982 |
| OLIGO_06746 | AW464614 | PFKL      | -0.8510 | 0.1183 | 1.0184  | 0.0458 | -0.0422 | 0.9211 | -0.2371 | 0.5254 |
| OLIGO_11523 | AW464619 | MYBPC2    | 0.5070  | 0.4692 | 0.2184  | 0.7393 | -0.3385 | 0.5839 | -0.1077 | 0.8532 |
| OLIGO_10219 | AW464623 | CBFA2T2   | -0.4616 | 0.1624 | 0.2395  | 0.4406 | 0.7374  | 0.0045 | 0.3522  | 0.1201 |
| OLIGO_07056 | AW464635 | ATP6V1G1  | 0.6347  | 0.1332 | -0.9748 | 0.0139 | -0.1416 | 0.6686 | 0.0844  | 0.7707 |
| OLIGO_10250 | AW464639 | ZDHHC6    | 0.8281  | 0.0111 | -0.8963 | 0.0033 | 0.0767  | 0.7631 | 0.1334  | 0.5495 |
| OLIGO_10212 | AW464642 | DNMT3B    | 0.1206  | 0.8229 | -0.1578 | 0.7543 | 0.5993  | 0.1563 | 0.5505  | 0.1369 |
| OLIGO_10282 | AW464646 | FAM82B    | 0.9458  | 0.0084 | -1.2716 | 0.0002 | 0.6901  | 0.0146 | 0.4620  | 0.0603 |
| OLIGO_11063 | AW464647 | HIP2      | 0.8594  | 0.0215 | -0.7906 | 0.0231 | 0.3170  | 0.2816 | 0.2750  | 0.2829 |
| OLIGO_10251 | AW464650 | PLXNA3    | 0.4249  | 0.2562 | 0.1184  | 0.7464 | -0.3076 | 0.2906 | -0.2563 | 0.3297 |
| OLIGO_05722 | AW464652 | PAK2      | 1.6260  | 0.0002 | -1.5989 | 0.0001 | -0.6326 | 0.0642 | -0.4966 | 0.0968 |
| OLIGO_10220 | AW464656 | FGFR2     | -0.8623 | 0.0565 | 0.8005  | 0.0584 | 0.1949  | 0.5816 | 0.3367  | 0.2771 |
| OLIGO_10143 | AW464657 | LOC651252 | -0.7350 | 0.2560 | 1.0240  | 0.0833 | 0.7366  | 0.1363 | 0.5850  | 0.1863 |
| OLIGO_10682 | AW464664 | ACTN4     | -0.0051 | 0.9886 | -0.6434 | 0.0543 | -0.4466 | 0.1121 | -0.5211 | 0.0341 |
| OLIGO_11289 | AW464668 | TACSTD2   | 1.5742  | 0.0428 | -3.2724 | 0.0000 | 2.7593  | 0.0000 | 2.3010  | 0.0000 |
| OLIGO_10221 | AW464669 | FAM109A   | 0.0044  | 0.9914 | 0.3717  | 0.3290 | 1.0007  | 0.0014 | 1.1446  | 0.0000 |
| OLIGO_10236 | AW464671 | HAX1      | 0.7875  | 0.0700 | -0.3141 | 0.4587 | 0.7709  | 0.0170 | 0.7107  | 0.0114 |
| OLIGO_06528 | AW464672 | QSCN6     | -0.6817 | 0.2382 | 1.2545  | 0.0213 | 0.1598  | 0.7240 | 0.0807  | 0.8386 |
| OLIGO_10155 | AW464676 | PPP1CC    | 0.0036  | 0.9929 | 0.5163  | 0.1836 | -0.7263 | 0.0215 | -0.2418 | 0.3806 |
| OLIGO_10222 | AW464681 | COPS5     | 0.0563  | 0.8397 | -0.0262 | 0.9195 | -0.5011 | 0.0234 | -0.4441 | 0.0207 |
| OLIGO_10215 | AW464690 | LAP3      | 0.8506  | 0.0162 | -1.1659 | 0.0004 | 0.9667  | 0.0006 | 0.5618  | 0.0208 |
| OLIGO_10243 | AW464694 | SLC25A20  | 0.0340  | 0.9449 | -0.1369 | 0.7664 | 0.1038  | 0.7880 | -0.0373 | 0.9123 |
| OLIGO_10255 | AW464695 | COPS8     | 0.5575  | 0.1844 | -0.1804 | 0.6541 | -0.3879 | 0.2359 | -0.2138 | 0.4552 |
| OLIGO_09088 | AW464696 | PALLD     | 0.9907  | 0.0140 | -0.9928 | 0.0085 | 0.2784  | 0.3772 | 0.5201  | 0.0607 |
| OLIGO_08599 | AW464700 | GCN5L2    | 0.1025  | 0.7222 | 0.2118  | 0.4308 | 0.3999  | 0.0821 | 0.1794  | 0.3665 |
| OLIGO_10216 | AW464701 | USF2      | 0.2871  | 0.1818 | -0.1185 | 0.5548 | -0.1800 | 0.2865 | -0.0897 | 0.5433 |
| OLIGO_10225 | AW464702 | HOMER3    | 0.0829  | 0.9081 | -0.3083 | 0.6602 | 0.8692  | 0.2251 | 0.4975  | 0.4502 |
| OLIGO_06868 | AW464712 | VDAC3     | -1.0609 | 0.0095 | 1.0493  | 0.0061 | 1.1453  | 0.0004 | 0.7222  | 0.0101 |
| OLIGO_08182 | AW464715 | DAZAP2    | -0.5034 | 0.1937 | 0.7833  | 0.0308 | -0.7066 | 0.0205 | -0.5819 | 0.0290 |
| OLIGO_10245 | AW464717 | LOC618479 | 0.3399  | 0.5062 | -0.7983 | 0.0955 | -1.1495 | 0.0043 | -0.6452 | 0.0663 |
| OLIGO_10256 | AW464718 | MNAT1     | 0.1990  | 0.6081 | 0.3294  | 0.3692 | 0.2489  | 0.4149 | -0.0166 | 0.9502 |

|             |          |           |         |        |         |        |         |        |         |        |
|-------------|----------|-----------|---------|--------|---------|--------|---------|--------|---------|--------|
| OLIGO_10263 | AW464719 | PFAAP5    | 0.2641  | 0.5549 | -0.2902 | 0.4879 | 0.3948  | 0.2650 | 0.4598  | 0.1397 |
| OLIGO_08425 | AW464722 | CALML5    | 1.1252  | 0.0172 | -1.3831 | 0.0017 | 0.6561  | 0.0679 | 0.4831  | 0.1244 |
| OLIGO_08948 | AW464726 | GCGR      | 0.4469  | 0.4720 | -0.6607 | 0.2811 | 0.5799  | 0.3370 | 0.2269  | 0.6979 |
| OLIGO_10565 | AW464728 | MKRN2     | -0.7691 | 0.4058 | -0.0215 | 0.9788 | 1.7028  | 0.0062 | 1.4677  | 0.0071 |
| OLIGO_08987 | AW464734 | BZW2      | 0.3168  | 0.3475 | -1.0897 | 0.0006 | -0.0565 | 0.8321 | -0.0986 | 0.6704 |
| OLIGO_10861 | AW464737 | C20orf55  | -0.7863 | 0.2193 | 1.0035  | 0.1147 | 0.6550  | 0.2705 | 0.2994  | 0.5898 |
| OLIGO_10264 | AW464741 | TSC22D1   | 0.0843  | 0.8784 | -0.7887 | 0.1973 | 0.2818  | 0.5819 | 0.1185  | 0.8037 |
| OLIGO_08568 | AW464744 | Sdc4      | 0.5882  | 0.3339 | -0.7346 | 0.1971 | -0.1355 | 0.7763 | -0.0728 | 0.8615 |
| OLIGO_10757 | AW464746 | CCT3      | 0.4154  | 0.1958 | -0.1190 | 0.6917 | -0.6284 | 0.0128 | -0.9247 | 0.0000 |
| OLIGO_08602 | AW464749 | PPIC      | 0.0603  | 0.9350 | 0.0964  | 0.8892 | 0.1725  | 0.7659 | 0.0407  | 0.9360 |
| OLIGO_10258 | AW464751 | NCDN      | 0.5337  | 0.1371 | 0.2240  | 0.5022 | -1.1228 | 0.0001 | -0.6982 | 0.0048 |
| OLIGO_10266 | AW464752 | SFT2D3    | 0.1599  | 0.6394 | 0.4322  | 0.1777 | 0.2093  | 0.4361 | -0.2593 | 0.2689 |
| OLIGO_10273 | AW464753 | SLC20A2   | 0.5479  | 0.3006 | -0.2122 | 0.6733 | 0.5073  | 0.1810 | 0.1036  | 0.7569 |
| OLIGO_11514 | AW464756 | TEAD3     | 0.5017  | 0.2065 | -0.6154 | 0.0977 | -0.0450 | 0.8850 | 0.4052  | 0.1371 |
| OLIGO_10033 | AW464763 | MRPL27    | 0.0976  | 0.6056 | -0.4168 | 0.0186 | 0.1064  | 0.4744 | 0.1251  | 0.3354 |
| OLIGO_10821 | AW464765 | ICAM2     | -0.1627 | 0.7135 | 0.2785  | 0.5016 | -0.5386 | 0.1231 | -0.4557 | 0.1451 |
| OLIGO_10279 | AW464767 | SLC35F5   | 0.1661  | 0.7084 | -0.4815 | 0.2493 | 0.6328  | 0.0699 | 0.7995  | 0.0097 |
| OLIGO_10627 | AW464770 | MGC133898 | -0.6532 | 0.3630 | 0.1194  | 0.8588 | -1.2639 | 0.0251 | -0.9772 | 0.0477 |
| OLIGO_10277 | AW464776 | TXN2      | 0.6304  | 0.0446 | -0.9292 | 0.0015 | 0.8316  | 0.0009 | 0.2509  | 0.2436 |
| OLIGO_08604 | AW464777 | ANKRD16   | -1.0508 | 0.0069 | 0.6415  | 0.0773 | 0.6655  | 0.0300 | 0.4899  | 0.0659 |
| OLIGO_10228 | AW464779 | MGC22793  | 0.0774  | 0.8450 | -0.4808 | 0.1945 | 0.2367  | 0.4471 | -0.1215 | 0.6620 |
| OLIGO_10775 | AW464781 | TADA2L    | -0.1073 | 0.7418 | -0.6073 | 0.0453 | -0.7000 | 0.0070 | -0.2466 | 0.2704 |
| OLIGO_03830 | AW464787 | Clcn3     | 0.5397  | 0.1227 | -1.2697 | 0.0001 | 0.1263  | 0.6447 | 0.3153  | 0.1903 |
| OLIGO_10240 | AW464792 | C2orf4    | -0.4932 | 0.7168 | -0.9329 | 0.4864 | 0.7619  | 0.5284 | 0.1105  | 0.9216 |
| OLIGO_10259 | AW464794 | CRSP8     | 0.4603  | 0.3560 | -0.2094 | 0.6643 | -0.1303 | 0.7805 | -0.1096 | 0.8090 |
| OLIGO_10234 | AW464801 | ZNRD1     | -0.1479 | 0.6177 | -0.1756 | 0.5395 | -0.0598 | 0.8206 | 0.0440  | 0.8607 |
| OLIGO_10268 | AW464805 | PDE2A     | -0.5352 | 0.1978 | 1.4272  | 0.0003 | -0.2790 | 0.3917 | -0.2532 | 0.3746 |
| OLIGO_10619 | AW464809 | RER1      | -0.3417 | 0.5527 | -0.3298 | 0.5400 | 0.0157  | 0.9723 | 0.1827  | 0.6472 |
| OLIGO_10230 | AW464812 | RFC2      | 0.3127  | 0.4777 | -0.1449 | 0.7249 | -0.4847 | 0.1606 | -0.5919 | 0.0506 |
| OLIGO_08957 | AW464816 | C12orf49  | 0.0994  | 0.7645 | -0.2979 | 0.3374 | 0.3579  | 0.1692 | 0.0763  | 0.7377 |
| OLIGO_10269 | AW464817 | ZNF235    | 0.6071  | 0.2651 | -0.6054 | 0.2348 | 0.6370  | 0.1424 | 0.2412  | 0.5272 |
| OLIGO_08536 | AW464818 | ANKRD1    | -0.1589 | 0.7321 | 1.1649  | 0.0075 | -1.2478 | 0.0007 | -1.1049 | 0.0006 |
| OLIGO_06815 | AW464821 | EXT1      | 0.5973  | 0.1040 | 0.0301  | 0.9305 | -0.8495 | 0.0033 | -0.7700 | 0.0023 |
| OLIGO_10231 | AW464822 | PPP4R1    | -0.1440 | 0.6990 | -0.3826 | 0.2696 | 1.0180  | 0.0006 | 1.0822  | 0.0000 |

|             |          |           |         |        |         |        |         |        |         |        |
|-------------|----------|-----------|---------|--------|---------|--------|---------|--------|---------|--------|
| OLIGO_11455 | AW464825 | TRIM37    | 0.0704  | 0.8605 | 0.0907  | 0.8088 | -0.6498 | 0.0390 | -0.4939 | 0.0729 |
| OLIGO_08885 | AW464826 | C19orf10  | 0.2281  | 0.4761 | -0.4229 | 0.1582 | 0.3985  | 0.1127 | 0.5193  | 0.0184 |
| OLIGO_10213 | AW464828 | C14orf119 | 0.0248  | 0.9211 | -0.1932 | 0.4095 | 0.3469  | 0.0777 | 0.3173  | 0.0653 |
| OLIGO_07198 | AW464829 | HDAC2     | -0.3952 | 0.3280 | 0.3301  | 0.3836 | -0.5691 | 0.0745 | -0.8302 | 0.0029 |
| OLIGO_01590 | AW464831 | TPR       | -0.3813 | 0.3031 | -0.7721 | 0.0261 | 0.4746  | 0.1022 | 0.2074  | 0.4140 |
| OLIGO_10270 | AW464836 | PSMD5     | 0.3336  | 0.3831 | 0.2469  | 0.4901 | -0.7523 | 0.0124 | -0.1613 | 0.5386 |
| OLIGO_06047 | AW464839 | FLJ34077  | -0.0350 | 0.9609 | 0.1117  | 0.8670 | 0.0372  | 0.9473 | 0.2758  | 0.5791 |
| OLIGO_10301 | AW464843 | LOC401152 | 0.8245  | 0.0111 | -0.8366 | 0.0059 | -0.1062 | 0.6751 | 0.1752  | 0.4299 |
| OLIGO_10305 | AW464844 | BPHL      | -0.7830 | 0.1529 | 1.2891  | 0.0121 | 0.2074  | 0.6287 | -0.2943 | 0.4332 |
| OLIGO_10799 | AW464845 | GNB1      | -0.4973 | 0.2225 | -0.1207 | 0.7513 | -0.5345 | 0.0946 | -0.4926 | 0.0785 |
| OLIGO_05894 | AW464846 | ZNF198    | -0.3991 | 0.1670 | -0.4568 | 0.0899 | -0.6186 | 0.0068 | -0.4522 | 0.0230 |
| OLIGO_10290 | AW464854 | HARSL     | 0.1265  | 0.7498 | -0.2973 | 0.4230 | 0.0656  | 0.8329 | 0.1584  | 0.5604 |
| OLIGO_03833 | AW464855 | SLC36A2   | 0.2840  | 0.5788 | -0.2638 | 0.5835 | 1.6891  | 0.0000 | 1.7445  | 0.0000 |
| OLIGO_07408 | AW464856 | H2AFV     | -0.4861 | 0.2495 | 0.7446  | 0.0906 | -0.7484 | 0.0987 | -0.6530 | 0.1460 |
| OLIGO_11107 | AW464859 | C10orf30  | -0.2012 | 0.7344 | 0.6166  | 0.2666 | -0.3775 | 0.4166 | 0.0669  | 0.8694 |
| OLIGO_05896 | AW464866 | LTA4H     | -0.2523 | 0.4888 | 0.6270  | 0.0664 | -0.1239 | 0.6935 | -0.1737 | 0.5206 |
| OLIGO_01490 | AW464867 | MYO9B     | -1.1028 | 0.0016 | 0.6974  | 0.0321 | 0.0796  | 0.7701 | 0.2098  | 0.3838 |
| OLIGO_03834 | AW464871 | RHOB      | 0.6646  | 0.0553 | -0.3849 | 0.2346 | -0.2124 | 0.4336 | 0.2132  | 0.3695 |
| OLIGO_06033 | AW464878 | SLC26A2   | -0.2748 | 0.5832 | 0.1177  | 0.8048 | 1.6813  | 0.0000 | 1.4748  | 0.0000 |
| OLIGO_06058 | AW464880 | RFP       | 0.2958  | 0.4927 | 0.1681  | 0.6766 | 0.1482  | 0.6614 | 0.3969  | 0.1849 |
| OLIGO_06065 | AW464881 | PHF5A     | 0.2746  | 0.5511 | -0.8917 | 0.0710 | -0.2102 | 0.6222 | -0.1047 | 0.7966 |
| OLIGO_10307 | AW464883 | THOC6     | 0.5526  | 0.0310 | -0.7293 | 0.0022 | 0.0731  | 0.7189 | 0.2014  | 0.2493 |
| OLIGO_10308 | AW464895 | PCID1     | 0.0599  | 0.8361 | -0.3009 | 0.2672 | -0.8191 | 0.0003 | -0.4177 | 0.0361 |
| OLIGO_10595 | AW464896 | FKBP2     | 0.3746  | 0.3534 | -0.1963 | 0.6001 | -0.3989 | 0.2037 | -0.3842 | 0.1621 |
| OLIGO_06059 | AW464903 | SLCO2B1   | 0.2703  | 0.5889 | -0.1354 | 0.7755 | 0.4053  | 0.3857 | 0.1372  | 0.7418 |
| OLIGO_10309 | AW464905 | TTF1      | -0.0679 | 0.8740 | -0.0758 | 0.8529 | -0.1607 | 0.6791 | -0.2311 | 0.5552 |
| OLIGO_05900 | AW464907 | RAB14     | -0.0545 | 0.8507 | -0.4096 | 0.1295 | -0.5411 | 0.0186 | -0.2999 | 0.1327 |
| OLIGO_06035 | AW464909 | BUD31     | 0.6598  | 0.1703 | -0.5684 | 0.2149 | 0.4080  | 0.3285 | 0.4104  | 0.3099 |
| OLIGO_09244 | AW464913 | COMMD5    | -0.4791 | 0.3693 | 0.4721  | 0.3464 | 0.8579  | 0.0388 | 0.2769  | 0.4452 |
| OLIGO_06066 | AW464914 | TMCC3     | 0.0710  | 0.8632 | 0.4772  | 0.2720 | 0.5813  | 0.2015 | 0.4481  | 0.2927 |
| OLIGO_10294 | AW464915 | USP2      | 0.4520  | 0.2863 | 0.2104  | 0.5938 | 0.3891  | 0.2234 | 0.1071  | 0.7059 |
| OLIGO_03835 | AW464916 | ANKRD47   | -0.4038 | 0.1896 | 0.5101  | 0.0767 | 0.6541  | 0.0069 | 0.5449  | 0.0101 |
| OLIGO_06036 | AW464919 | EMR3      | 0.8337  | 0.3662 | -2.1707 | 0.0162 | 0.1335  | 0.8338 | -0.1668 | 0.7579 |
| OLIGO_08652 | AW464924 | LOC93343  | 0.5809  | 0.0812 | -0.0052 | 0.9867 | 0.6604  | 0.0119 | 0.3913  | 0.0872 |

|             |          |           |         |        |         |        |         |        |         |        |
|-------------|----------|-----------|---------|--------|---------|--------|---------|--------|---------|--------|
| OLIGO_03838 | AW464927 | WDR26     | -0.0106 | 0.9834 | -0.2906 | 0.5418 | 0.1676  | 0.6745 | -0.0387 | 0.9117 |
| OLIGO_06042 | AW464930 | Etv3      | -0.1019 | 0.8766 | 0.1170  | 0.8557 | 0.7275  | 0.1460 | 0.8202  | 0.0606 |
| OLIGO_10312 | AW464936 | AFAP      | 0.6798  | 0.2564 | -0.9798 | 0.0654 | 0.7725  | 0.0690 | 0.3118  | 0.3958 |
| OLIGO_05901 | AW464938 | ENTPD4    | 0.2470  | 0.5898 | -0.3147 | 0.4571 | -0.3534 | 0.3117 | 0.0111  | 0.9711 |
| OLIGO_11400 | AW464940 | FETUB     | -0.5368 | 0.2162 | 0.9696  | 0.0172 | -0.7796 | 0.0222 | -0.8774 | 0.0033 |
| OLIGO_06043 | AW464941 | PIAS1     | 0.6420  | 0.0770 | -0.1985 | 0.5621 | -0.3901 | 0.1730 | -0.4660 | 0.0713 |
| OLIGO_10792 | AW464944 | SAFB2     | 0.1711  | 0.6153 | 0.2075  | 0.5147 | 0.2986  | 0.2697 | -0.0834 | 0.7214 |
| OLIGO_10303 | AW464946 | SEC11L3   | 0.7778  | 0.0082 | -1.5395 | 0.0000 | 0.0313  | 0.8925 | -0.1335 | 0.5067 |
| OLIGO_08605 | AW464947 | VPRBP     | 0.4447  | 0.4594 | -0.7533 | 0.2122 | 0.0285  | 0.9577 | 0.3208  | 0.5387 |
| OLIGO_08606 | AW464950 | SUV420H1  | 0.1624  | 0.5197 | -0.6929 | 0.0033 | -0.2514 | 0.2157 | 0.1939  | 0.2899 |
| OLIGO_06044 | AW464952 | ARID5A    | 0.8533  | 0.1853 | 0.1070  | 0.8574 | -0.1468 | 0.7945 | 0.0783  | 0.8851 |
| OLIGO_08161 | AW464953 | COPB      | 0.1570  | 0.6722 | -0.0011 | 0.9975 | -0.6811 | 0.0211 | -0.4176 | 0.1019 |
| OLIGO_11622 | AW464957 | Rgl1      | 0.5264  | 0.4440 | -0.5640 | 0.4026 | 0.3088  | 0.6397 | 0.1617  | 0.8010 |
| OLIGO_10645 | AW464961 | TM9SF2    | -0.0962 | 0.7608 | -0.9047 | 0.0021 | 0.5785  | 0.0230 | 0.6540  | 0.0030 |
| OLIGO_11547 | AW464962 | PPP1R16A  | -0.1565 | 0.8456 | 0.0804  | 0.9148 | 0.3603  | 0.5672 | 0.4348  | 0.4304 |
| OLIGO_06061 | AW464967 | AHCYL1    | 0.1828  | 0.5658 | -0.3384 | 0.2549 | -0.3321 | 0.1856 | -0.1173 | 0.5921 |
| OLIGO_10297 | AW464969 | EMD       | -0.4794 | 0.2488 | 0.5266  | 0.1752 | 0.3517  | 0.2817 | -0.2927 | 0.3052 |
| OLIGO_05902 | AW464972 | ITGA6     | -0.7867 | 0.1119 | 0.7904  | 0.0877 | -0.7190 | 0.0690 | -0.8075 | 0.0372 |
| OLIGO_03841 | AW464974 | LOC507686 | 0.0734  | 0.8290 | 0.7190  | 0.0238 | -0.6226 | 0.0208 | -0.3102 | 0.1849 |
| OLIGO_00308 | AW464976 | SNAPC3    | 0.3099  | 0.3565 | -0.7177 | 0.0228 | 0.0444  | 0.8660 | -0.0998 | 0.6650 |
| OLIGO_11334 | AW464978 | HNRPL     | -0.0902 | 0.8766 | -0.1894 | 0.7386 | -0.6949 | 0.2207 | -0.6046 | 0.2710 |
| OLIGO_07227 | AW464979 | ST13      | -0.5709 | 0.0884 | 0.1410  | 0.6500 | 0.1771  | 0.5038 | -0.1030 | 0.6537 |
| OLIGO_10298 | AW464980 | CA2       | -1.1903 | 0.0006 | 1.7917  | 0.0000 | 0.1920  | 0.4833 | -0.1215 | 0.6069 |
| OLIGO_08607 | AW464985 | USP9X     | 0.1870  | 0.5626 | -0.6653 | 0.0274 | 0.6689  | 0.0098 | 0.9844  | 0.0000 |
| OLIGO_06040 | AW464986 | C1orf198  | 0.4125  | 0.4259 | -0.5087 | 0.2938 | -0.1602 | 0.6930 | -0.2029 | 0.5681 |
| OLIGO_11090 | AW464989 | FBXO11    | 0.0809  | 0.7999 | -0.4529 | 0.1246 | 0.1757  | 0.4835 | 0.0148  | 0.9456 |
| OLIGO_10442 | AW464991 | DCN       | 0.2763  | 0.7360 | -0.6029 | 0.6647 | 0.4362  | 0.3396 | 0.9058  | 0.0269 |
| OLIGO_05904 | AW464992 | CLTA      | 1.0502  | 0.0005 | -1.2557 | 0.0000 | -0.1424 | 0.5411 | -0.3047 | 0.1356 |
| OLIGO_06046 | AW464995 | SMARCA5   | 0.7398  | 0.0818 | -0.1539 | 0.6964 | 0.3917  | 0.2438 | 0.8468  | 0.0039 |
| OLIGO_10304 | AW464999 | KLHL21    | 0.4790  | 0.4655 | -0.7468 | 0.1982 | 0.3469  | 0.4144 | -0.0380 | 0.9187 |
| OLIGO_06048 | AW465006 | TFAP2C    | 0.3044  | 0.7634 | -0.9864 | 0.3206 | 2.4455  | 0.0237 | 1.6116  | 0.0964 |
| OLIGO_06063 | AW465008 | PRMT1     | 0.1765  | 0.5402 | -0.3120 | 0.2456 | -0.5794 | 0.0112 | -0.6730 | 0.0007 |
| OLIGO_05895 | AW465009 | C12orf10  | 0.3628  | 0.4485 | -0.4299 | 0.3370 | 0.4612  | 0.2192 | 0.0963  | 0.7692 |
| OLIGO_10284 | AW465012 | YPEL2     | 0.1655  | 0.7385 | 0.2134  | 0.6411 | -0.1931 | 0.6089 | -0.2086 | 0.5279 |

|             |          |          |         |        |         |        |         |        |         |        |
|-------------|----------|----------|---------|--------|---------|--------|---------|--------|---------|--------|
| OLIGO_10292 | AW465015 | PEX16    | -0.5499 | 0.2786 | 0.5998  | 0.2091 | 0.5739  | 0.1493 | 0.4077  | 0.2418 |
| OLIGO_05897 | AW465024 | PRMT5    | -0.1941 | 0.7933 | 0.3692  | 0.5940 | 0.4682  | 0.4198 | -0.3129 | 0.5379 |
| OLIGO_05905 | AW465025 | CEACAM19 | 0.8637  | 0.2811 | 0.1291  | 0.8654 | 1.1236  | 0.1486 | 0.6539  | 0.3602 |
| OLIGO_06050 | AW465029 | CPNE1    | -0.0042 | 0.9960 | 0.1990  | 0.7984 | -1.2444 | 0.0573 | -0.9394 | 0.1010 |
| OLIGO_06056 | AW465030 | GRAMD3   | 0.9016  | 0.1255 | -0.2877 | 0.6122 | 0.1350  | 0.7704 | 0.2611  | 0.5202 |
| OLIGO_06064 | AW465031 | RPS6KA3  | -0.1123 | 0.7081 | -0.1775 | 0.5254 | 0.3807  | 0.1086 | 0.3016  | 0.1440 |
| OLIGO_05898 | AW465035 | EGLN3    | 1.1865  | 0.0276 | -0.3607 | 0.5033 | -0.4968 | 0.1620 | -0.5645 | 0.0689 |
| OLIGO_08464 | AW465036 | TCAP     | 0.6226  | 0.3744 | -0.5368 | 0.4128 | -0.0407 | 0.9409 | -0.2347 | 0.6268 |
| OLIGO_08541 | AW465041 | NTAN1    | 0.3328  | 0.3287 | -0.0608 | 0.8477 | 0.5600  | 0.0387 | 0.2845  | 0.2240 |
| OLIGO_05899 | AW465043 | PPP5C    | -0.1530 | 0.6503 | -0.3548 | 0.2494 | 0.0875  | 0.7424 | -0.0344 | 0.8793 |
| OLIGO_06831 | AW465044 | PRDX3    | -0.0620 | 0.9121 | -0.9415 | 0.0854 | 0.5058  | 0.2030 | 0.0971  | 0.7726 |
| OLIGO_10662 | AW465050 | PSMB3    | -0.0353 | 0.9331 | -1.0135 | 0.0103 | -0.8962 | 0.0067 | -0.6035 | 0.0367 |
| OLIGO_03842 | AW465053 | UTP11L   | 0.2905  | 0.4910 | 0.5567  | 0.1585 | 0.1763  | 0.5940 | 0.1988  | 0.4938 |
| OLIGO_11463 | AW465054 | NCOA4    | 0.3649  | 0.2913 | -0.9518 | 0.0032 | -0.1452 | 0.5966 | -0.0098 | 0.9670 |
| OLIGO_10293 | AW465059 | USP15    | 0.5434  | 0.2170 | -0.4711 | 0.2652 | 0.1945  | 0.6170 | 0.3977  | 0.3027 |
| OLIGO_10302 | AW465060 | KRT15    | 0.1856  | 0.7667 | -0.4569 | 0.4572 | 0.5901  | 0.3269 | 0.1543  | 0.7846 |
| OLIGO_10310 | AW465061 | FAM103A1 | -0.0511 | 0.8586 | 0.0567  | 0.8326 | -0.1543 | 0.4928 | -0.0448 | 0.8218 |
| OLIGO_10311 | AW465067 | GDPD1    | 0.0102  | 0.9803 | 0.0336  | 0.9310 | 1.2587  | 0.0001 | 1.0862  | 0.0002 |
| OLIGO_10295 | AW465072 | SNX12    | 0.5499  | 0.1886 | -0.4744 | 0.2251 | -0.2994 | 0.3607 | -0.0218 | 0.9395 |
| OLIGO_07479 | AW465073 | CHCHD2   | 0.6710  | 0.0240 | -0.1232 | 0.6565 | -0.5585 | 0.0194 | -0.2141 | 0.2933 |
| OLIGO_10697 | AW465076 | CAP1     | 0.9218  | 0.0655 | -0.9336 | 0.0462 | -0.0313 | 0.9363 | 0.0510  | 0.8816 |
| OLIGO_09241 | AW465083 | SERPINA5 | -0.7532 | 0.3498 | 0.9655  | 0.2000 | 2.7925  | 0.0000 | 2.1911  | 0.0001 |
| OLIGO_10820 | AW465088 | EGR1     | 0.1953  | 0.7151 | -0.1124 | 0.8222 | -2.0314 | 0.0000 | -1.7944 | 0.0000 |
| OLIGO_06052 | AW465089 | TNFAIP8  | 0.5438  | 0.4714 | -0.3603 | 0.6189 | -0.0460 | 0.9475 | -0.0671 | 0.9206 |
| OLIGO_06060 | AW465090 | SGCE     | -1.8485 | 0.0007 | 1.6973  | 0.0009 | -0.0758 | 0.8588 | 0.2425  | 0.5158 |
| OLIGO_03843 | AW465093 | KCNT2    | 0.7388  | 0.0463 | -0.0585 | 0.8655 | -0.3874 | 0.1842 | -0.3507 | 0.1766 |
| OLIGO_11139 | AW465097 | C13orf12 | -0.2358 | 0.4605 | 0.1732  | 0.5660 | -0.3038 | 0.3443 | 0.0591  | 0.8225 |
| OLIGO_08609 | AW465099 | MFSD5    | 0.7143  | 0.0006 | -0.6693 | 0.0005 | 0.1349  | 0.4065 | 0.1906  | 0.1766 |
| OLIGO_06045 | AW465104 | CTBP1    | -0.7826 | 0.0882 | 1.5570  | 0.0003 | 0.8346  | 0.0213 | 0.9595  | 0.0025 |
| OLIGO_11609 | AW465110 | TMEM110  | 0.4785  | 0.1528 | -0.2587 | 0.3971 | 0.0415  | 0.8732 | -0.0398 | 0.8611 |
| OLIGO_03844 | AW465111 | MRPS18C  | 0.7847  | 0.0130 | -1.0853 | 0.0003 | -0.4273 | 0.0860 | -0.0488 | 0.8249 |
| OLIGO_03104 | AW465112 | AVPI1    | -0.3207 | 0.6018 | -0.0205 | 0.9715 | -0.6453 | 0.1808 | -0.4023 | 0.3403 |
| OLIGO_06053 | AW465115 | MYCBP    | 0.0824  | 0.8012 | -0.7612 | 0.0129 | 0.6444  | 0.0130 | 0.5173  | 0.0219 |
| OLIGO_08611 | AW465123 | TRIP12   | 0.1361  | 0.6749 | -1.1630 | 0.0001 | 0.1882  | 0.4647 | 0.7913  | 0.0004 |

|             |          |          |         |        |         |        |         |        |         |        |
|-------------|----------|----------|---------|--------|---------|--------|---------|--------|---------|--------|
| OLIGO_08085 | AW465125 | HADH2    | 0.2372  | 0.4257 | -0.5814 | 0.0372 | 0.2694  | 0.2484 | -0.1319 | 0.5184 |
| OLIGO_10318 | AW465128 | STX7     | 0.8320  | 0.0248 | -0.6862 | 0.0476 | -0.9433 | 0.0012 | -0.8069 | 0.0016 |
| OLIGO_08612 | AW465131 | GUK1     | -0.1129 | 0.6512 | 0.1992  | 0.3927 | 0.0617  | 0.7539 | -0.2231 | 0.1940 |
| OLIGO_06099 | AW465133 | LOC51136 | 0.5601  | 0.0458 | -0.6622 | 0.0113 | 0.4099  | 0.0644 | 0.4484  | 0.0201 |
| OLIGO_06710 | AW465134 | CCT6A    | -0.3527 | 0.5854 | 0.0926  | 0.8783 | -0.3753 | 0.4591 | -0.9619 | 0.0306 |
| OLIGO_06068 | AW465141 | AP2S1    | 0.7962  | 0.0062 | -0.9577 | 0.0004 | -0.0222 | 0.9228 | 0.1774  | 0.3727 |
| OLIGO_07394 | AW465148 | GAS2L1   | 0.1490  | 0.7391 | 0.1789  | 0.6692 | 0.0429  | 0.9030 | -0.2109 | 0.5022 |
| OLIGO_08393 | AW465149 | SCARB2   | -0.2295 | 0.5299 | 0.2708  | 0.4447 | -0.0168 | 0.9573 | -0.1373 | 0.6533 |
| OLIGO_08537 | AW465157 | SHOX2    | 0.8282  | 0.0436 | -0.5229 | 0.1743 | -0.2041 | 0.4940 | -0.0324 | 0.9010 |
| OLIGO_08617 | AW465161 | TNFAIP3  | -0.0336 | 0.9315 | 0.3558  | 0.3299 | -0.0187 | 0.9513 | -0.0075 | 0.9778 |
| OLIGO_03846 | AW465162 | PPTC7    | 0.9982  | 0.0054 | -1.1158 | 0.0009 | -0.4670 | 0.0986 | 0.0629  | 0.7978 |
| OLIGO_07380 | AW465165 | FNTA     | -1.0953 | 0.0009 | 0.8484  | 0.0055 | -0.0250 | 0.9228 | -0.1088 | 0.6280 |
| OLIGO_06087 | AW465166 | CEBPG    | 0.0566  | 0.9025 | -0.0579 | 0.8934 | -0.4663 | 0.1982 | -0.6364 | 0.0459 |
| OLIGO_07840 | AW465170 | CD63     | -0.0547 | 0.9396 | -0.7560 | 0.2634 | -0.0769 | 0.8919 | 0.5471  | 0.2697 |
| OLIGO_06822 | AW465171 | C1QA     | -1.2334 | 0.1175 | 1.9600  | 0.0080 | 1.3972  | 0.0274 | 1.6355  | 0.0033 |
| OLIGO_06088 | AW465181 | TMPRSS4  | -0.4613 | 0.1125 | 0.0725  | 0.7845 | 0.3532  | 0.1052 | 0.2296  | 0.2206 |
| OLIGO_08168 | AW465185 | SUMO1    | 0.1472  | 0.7121 | -0.1397 | 0.7097 | -0.3396 | 0.3716 | -0.3072 | 0.3202 |
| OLIGO_08804 | AW465186 | SLC31A2  | 1.0309  | 0.0005 | -1.2183 | 0.0000 | 0.6436  | 0.0057 | 0.7067  | 0.0005 |
| OLIGO_07422 | AW465187 | C6orf111 | -0.2317 | 0.5989 | 0.5883  | 0.1890 | -0.0648 | 0.8728 | -0.0170 | 0.9651 |
| OLIGO_11070 | AW465188 | CRNKL1   | 0.4974  | 0.1810 | -0.3038 | 0.3820 | -0.9177 | 0.0018 | -0.3437 | 0.1828 |
| OLIGO_06096 | AW465190 | MPST     | -0.0954 | 0.7205 | 0.1627  | 0.5134 | -0.2200 | 0.2950 | -0.2477 | 0.1770 |
| OLIGO_07788 | AW465191 | RRAS     | 0.1736  | 0.6620 | -0.3527 | 0.3628 | 0.1318  | 0.6767 | -0.0048 | 0.9860 |
| OLIGO_03848 | AW465195 | AXL      | 0.1144  | 0.9055 | 0.1291  | 0.8901 | -1.2626 | 0.1784 | -0.5974 | 0.4902 |
| OLIGO_03849 | AW465197 | TNC      | -0.5273 | 0.3711 | 0.2147  | 0.6963 | 0.8407  | 0.0669 | 0.6837  | 0.0886 |
| OLIGO_03850 | AW465203 | CEP63    | -0.2834 | 0.5125 | 0.0230  | 0.9549 | 0.7033  | 0.0416 | 0.0216  | 0.9426 |
| OLIGO_03851 | AW465208 | PQLC3    | 0.2962  | 0.5841 | -0.6768 | 0.2160 | 0.2489  | 0.6142 | 0.2846  | 0.5493 |
| OLIGO_10890 | AW465209 | PKM2     | -0.0597 | 0.8962 | -0.0628 | 0.8833 | -1.6221 | 0.0000 | -1.4622 | 0.0000 |
| OLIGO_06098 | AW465210 | JOSD3    | -0.3489 | 0.4390 | 0.3250  | 0.4408 | 0.1153  | 0.7441 | 0.2108  | 0.4956 |
| OLIGO_06074 | AW465212 | GSR      | 0.4463  | 0.4634 | -0.6835 | 0.2301 | 1.7530  | 0.0003 | 1.6865  | 0.0001 |
| OLIGO_03852 | AW465213 | ZNF289   | 0.1353  | 0.7049 | -0.1359 | 0.6844 | -0.5184 | 0.0646 | -0.3687 | 0.1330 |
| OLIGO_08833 | AW465216 | SLC3A2   | 0.6842  | 0.1101 | 0.3115  | 0.4388 | 0.6203  | 0.0647 | 0.8481  | 0.0040 |
| OLIGO_07387 | AW465223 | PPP2R1A  | 0.3949  | 0.2960 | 0.4152  | 0.2402 | -1.1515 | 0.0001 | -0.8718 | 0.0009 |
| OLIGO_06092 | AW465225 | GSTZ1    | 0.6494  | 0.0916 | -0.4081 | 0.2585 | 0.1126  | 0.7095 | -0.1410 | 0.5932 |
| OLIGO_10673 | AW465227 | ARMET    | -0.1216 | 0.6922 | -0.0046 | 0.9873 | -0.3929 | 0.1101 | -0.5237 | 0.0136 |

|             |          |           |         |        |         |        |         |        |         |        |
|-------------|----------|-----------|---------|--------|---------|--------|---------|--------|---------|--------|
| OLIGO_03854 | AW465228 | CWF19L1   | 0.1140  | 0.7993 | 0.3133  | 0.4766 | -0.2172 | 0.6106 | -0.0757 | 0.8537 |
| OLIGO_11188 | AW465232 | GPX4      | -0.2227 | 0.5544 | 0.2619  | 0.4582 | 0.3346  | 0.2696 | 0.1831  | 0.4806 |
| OLIGO_07135 | AW465233 | COX4I1    | 0.1595  | 0.7000 | -0.0556 | 0.8858 | -0.3455 | 0.2872 | -0.5507 | 0.0531 |
| OLIGO_08414 | AW465235 | S100A2    | -0.9684 | 0.0665 | 1.3627  | 0.0060 | -1.7209 | 0.0000 | -1.7266 | 0.0000 |
| OLIGO_06078 | AW465238 | PLEKHK1   | -0.4577 | 0.5303 | 0.2328  | 0.7372 | 2.1104  | 0.0000 | 1.4688  | 0.0010 |
| OLIGO_03855 | AW465240 | PPP6C     | 0.2726  | 0.4860 | -0.4105 | 0.2883 | -0.2135 | 0.5577 | 0.2676  | 0.4487 |
| OLIGO_06992 | AW465246 | YME1L1    | 0.3678  | 0.2388 | -0.6823 | 0.0193 | -0.0126 | 0.9591 | -0.0117 | 0.9565 |
| OLIGO_09002 | AW465247 | CYB5B     | 1.3609  | 0.0000 | -1.5449 | 0.0000 | -0.0882 | 0.7142 | -0.1014 | 0.6291 |
| OLIGO_03856 | AW465249 | STX6      | 0.4020  | 0.3322 | 0.2867  | 0.4603 | -0.4334 | 0.3125 | -0.1989 | 0.5843 |
| OLIGO_00677 | AW465250 | SDHC      | 0.5451  | 0.2693 | -1.0790 | 0.0197 | -0.2223 | 0.5684 | -0.3261 | 0.3364 |
| OLIGO_06070 | AW465257 | ANAPC5    | -0.1040 | 0.7690 | 0.3482  | 0.2933 | -0.2045 | 0.4614 | -0.0317 | 0.8966 |
| OLIGO_08621 | AW465261 | MYOZ1     | -0.0465 | 0.9272 | 0.0019  | 0.9968 | -0.0552 | 0.8900 | 0.0836  | 0.8106 |
| OLIGO_06071 | AW465262 | ZNF651    | 0.0134  | 0.9803 | 0.3364  | 0.5032 | -0.4349 | 0.3017 | -0.3791 | 0.3038 |
| OLIGO_08622 | AW465265 | QPCTL     | 0.9076  | 0.0001 | -0.8608 | 0.0001 | 0.4669  | 0.0093 | 0.1894  | 0.2346 |
| OLIGO_06094 | AW465272 | BXDC2     | 0.1837  | 0.5814 | -0.4121 | 0.1863 | -0.4441 | 0.0894 | -0.3041 | 0.1837 |
| OLIGO_08624 | AW465274 | AAK1      | 0.3242  | 0.5086 | -0.5071 | 0.3177 | 0.2122  | 0.5401 | 0.2183  | 0.4715 |
| OLIGO_03858 | AW465276 | EIF2B2    | -0.3765 | 0.3613 | 0.1434  | 0.7100 | 0.2919  | 0.3669 | 0.0308  | 0.9136 |
| OLIGO_06081 | AW465277 | NVL       | 0.3255  | 0.3503 | -0.5779 | 0.0765 | -0.0019 | 0.9943 | 0.0628  | 0.7927 |
| OLIGO_10426 | AW465279 | LOC520580 | 0.4772  | 0.1360 | -0.8969 | 0.0028 | -0.3033 | 0.2263 | -0.0970 | 0.6582 |
| OLIGO_06097 | AW465280 | KLHL20    | 0.0962  | 0.7648 | -0.3310 | 0.2715 | 0.0806  | 0.7493 | 0.2366  | 0.2840 |
| OLIGO_08276 | AW465283 | ANAPC13   | -0.1008 | 0.7784 | 0.1567  | 0.6420 | -0.5575 | 0.0474 | -0.3732 | 0.1292 |
| OLIGO_11402 | AW465286 | THOC5     | -0.2787 | 0.3855 | 0.0551  | 0.8543 | 0.1746  | 0.4880 | 0.2813  | 0.2020 |
| OLIGO_06089 | AW465287 | SH3GLB1   | 0.0326  | 0.9144 | -0.1417 | 0.6160 | 0.1807  | 0.4526 | 0.2167  | 0.2996 |
| OLIGO_06090 | AW465294 | SLC17A7   | 1.0892  | 0.0121 | -0.1930 | 0.6357 | -0.8843 | 0.0059 | -0.7620 | 0.0067 |
| OLIGO_06681 | AW465295 | CCDC8     | -1.5912 | 0.0000 | 1.8330  | 0.0000 | 0.6217  | 0.0312 | 0.6866  | 0.0061 |
| OLIGO_03860 | AW465296 | TESSP2    | -0.0388 | 0.9480 | -0.3414 | 0.5465 | 0.2792  | 0.5222 | 0.1670  | 0.6585 |
| OLIGO_10577 | AW465299 | DLK1      | -0.5619 | 0.6319 | 0.7092  | 0.5369 | 0.0447  | 0.9680 | 0.3393  | 0.7541 |
| OLIGO_06949 | AW465305 | PCBP1     | 0.4057  | 0.5100 | -0.6196 | 0.2822 | -0.7504 | 0.1204 | -0.7362 | 0.0819 |
| OLIGO_08628 | AW465307 | LPP       | 1.2965  | 0.0146 | -0.4329 | 0.3937 | 0.5934  | 0.1475 | 0.5576  | 0.1200 |
| OLIGO_06075 | AW465308 | PQBP1     | -0.1677 | 0.7200 | -0.2465 | 0.5594 | 0.7402  | 0.0266 | 0.1514  | 0.5982 |
| OLIGO_08631 | AW465320 | TGFBR2    | 0.6448  | 0.2475 | -0.3686 | 0.4200 | 0.6335  | 0.0392 | 0.6841  | 0.0111 |
| OLIGO_03862 | AW465321 | HERC1     | 0.3933  | 0.4086 | -0.1695 | 0.7049 | -0.1442 | 0.6988 | -0.2577 | 0.4299 |
| OLIGO_10796 | AW465322 | KIAA0284  | 0.3077  | 0.3423 | 0.1811  | 0.5468 | 0.2903  | 0.2594 | 0.4891  | 0.0283 |
| OLIGO_07520 | AW465324 | ZMYM3     | 0.0703  | 0.8129 | 0.1199  | 0.6661 | -0.2957 | 0.2044 | -0.1859 | 0.3618 |

|             |          |          |         |        |         |        |         |        |         |        |
|-------------|----------|----------|---------|--------|---------|--------|---------|--------|---------|--------|
| OLIGO_06084 | AW465328 | B4GALT3  | 1.0462  | 0.0606 | -1.3050 | 0.0125 | 1.1996  | 0.0062 | 0.9440  | 0.0137 |
| OLIGO_10724 | AW465330 | HARS2    | 0.4064  | 0.0823 | -0.7608 | 0.0005 | -0.3324 | 0.0734 | -0.3301 | 0.0399 |
| OLIGO_10856 | AW465331 | IER3     | 0.9527  | 0.0360 | -1.0246 | 0.0157 | -1.2214 | 0.0007 | -0.9311 | 0.0031 |
| OLIGO_10776 | AW465337 | S100A11  | -0.6403 | 0.3857 | 0.8089  | 0.2414 | -1.3545 | 0.0195 | -0.9990 | 0.0489 |
| OLIGO_03863 | AW465340 | TGIF     | 0.0926  | 0.8045 | 0.1367  | 0.6944 | 0.0810  | 0.7783 | 0.1877  | 0.4510 |
| OLIGO_11403 | AW465344 | IL22RA1  | -0.5416 | 0.1938 | 0.0975  | 0.8022 | 0.4027  | 0.2184 | 0.3940  | 0.1705 |
| OLIGO_06093 | AW465345 | WDR18    | -0.2024 | 0.7557 | 0.3401  | 0.5910 | 0.6999  | 0.2705 | 0.4573  | 0.4420 |
| OLIGO_03864 | AW465346 | MBNL3    | 0.0387  | 0.9327 | -0.1788 | 0.6754 | 1.2383  | 0.0007 | 1.1464  | 0.0003 |
| OLIGO_06085 | AW465351 | DCTN6    | 0.4191  | 0.1208 | -0.9167 | 0.0003 | -0.1850 | 0.3865 | -0.2400 | 0.1959 |
| OLIGO_08162 | AW465353 | ARL4A    | 0.3475  | 0.3856 | 0.7234  | 0.0539 | 0.1301  | 0.6791 | 0.2783  | 0.3167 |
| OLIGO_11330 | AW465354 | TUBG2    | 0.2005  | 0.5387 | -0.5672 | 0.1181 | 0.2302  | 0.4478 | 0.1862  | 0.5170 |
| OLIGO_06079 | AW465355 | GLB1     | 0.2397  | 0.4754 | 0.2591  | 0.4093 | 0.1263  | 0.6317 | -0.0397 | 0.8631 |
| OLIGO_08633 | AW465357 | MBNL1    | -1.1331 | 0.0081 | 1.5161  | 0.0001 | -0.8281 | 0.0146 | -0.0506 | 0.8624 |
| OLIGO_11367 | AW465360 | OSBPL9   | 0.4495  | 0.2795 | -0.6255 | 0.1466 | -0.0625 | 0.8590 | -0.1287 | 0.7041 |
| OLIGO_03865 | AW465363 | BIRC6    | -0.0914 | 0.7947 | -0.1097 | 0.7371 | -0.1693 | 0.5428 | -0.2023 | 0.4023 |
| OLIGO_06104 | AW465370 | PNPT1    | 0.2844  | 0.2911 | -0.9195 | 0.0003 | -0.4988 | 0.0193 | -0.0767 | 0.6784 |
| OLIGO_10618 | AW465372 | TP53I13  | 0.2829  | 0.6378 | -0.4849 | 0.4103 | -0.9098 | 0.1339 | -0.6809 | 0.2278 |
| OLIGO_06136 | AW465382 | HPSE     | -0.9692 | 0.4060 | 0.9829  | 0.3706 | 3.8001  | 0.0189 | 2.5265  | 0.0713 |
| OLIGO_03867 | AW465385 | TAF5L    | 0.3061  | 0.4546 | -0.6672 | 0.0784 | 0.4304  | 0.1800 | 0.6947  | 0.0132 |
| OLIGO_11326 | AW465398 | HES1     | 0.7831  | 0.0331 | -0.7309 | 0.0333 | -0.8927 | 0.0032 | -0.9422 | 0.0003 |
| OLIGO_08084 | AW465399 | AHSA1    | 0.2488  | 0.3618 | -0.4131 | 0.1052 | -0.5885 | 0.0064 | -0.4865 | 0.0097 |
| OLIGO_07012 | AW465404 | HMGN2    | -1.5011 | 0.0078 | 1.4793  | 0.0049 | -1.0734 | 0.0159 | -1.0725 | 0.0063 |
| OLIGO_06137 | AW465405 | RBM15    | -0.4370 | 0.2348 | -0.0621 | 0.8554 | 0.2844  | 0.3301 | -0.1934 | 0.4428 |
| OLIGO_08637 | AW465410 | Pdcd6    | 0.2838  | 0.4193 | -0.6120 | 0.0630 | 0.2057  | 0.4552 | -0.0314 | 0.8963 |
| OLIGO_03869 | AW465415 | GOSR1    | 0.5640  | 0.0348 | -0.8214 | 0.0010 | 0.3160  | 0.1351 | 0.2992  | 0.1025 |
| OLIGO_06106 | AW465416 | RASSF6   | -0.1545 | 0.8460 | 0.6523  | 0.3693 | 1.5202  | 0.0134 | 1.6341  | 0.0028 |
| OLIGO_10992 | AW465424 | CENTG3   | 0.7865  | 0.0660 | -0.7694 | 0.0545 | -0.6852 | 0.0410 | -0.9301 | 0.0016 |
| OLIGO_03808 | AW465425 | CCT2     | 0.2690  | 0.4633 | -0.5974 | 0.0806 | -0.6086 | 0.0366 | -0.5076 | 0.0446 |
| OLIGO_03871 | AW465426 | NAGLU    | -0.0076 | 0.9882 | -0.1526 | 0.7514 | -0.3174 | 0.4316 | 0.0659  | 0.8520 |
| OLIGO_08638 | AW465429 | YTHDF2   | 0.3592  | 0.1453 | -0.4708 | 0.0399 | 0.9520  | 0.0000 | 0.5521  | 0.0014 |
| OLIGO_06101 | AW465435 | FLJ22709 | 0.0495  | 0.8888 | -0.2990 | 0.3667 | 0.2407  | 0.3857 | 0.1606  | 0.5087 |
| OLIGO_06127 | AW465450 | C1orf133 | 0.1505  | 0.7606 | -0.0789 | 0.8645 | 0.0613  | 0.8757 | 0.2694  | 0.4368 |
| OLIGO_10594 | AW465453 | NDUFB10  | -0.2028 | 0.5747 | 0.0268  | 0.9366 | -0.9081 | 0.0016 | -0.6547 | 0.0087 |
| OLIGO_06105 | AW465454 | SFN      | 0.9210  | 0.1194 | -1.0190 | 0.0656 | -0.3668 | 0.4283 | -0.2617 | 0.5186 |

|             |          |           |         |        |         |        |         |        |         |        |
|-------------|----------|-----------|---------|--------|---------|--------|---------|--------|---------|--------|
| OLIGO_11329 | AW465456 | TP53BP1   | -0.5425 | 0.3570 | 0.6500  | 0.2381 | 0.0472  | 0.9188 | 0.0262  | 0.9494 |
| OLIGO_08388 | AW465457 | C17orf61  | 0.2817  | 0.3363 | -0.6264 | 0.0225 | -0.4092 | 0.0760 | -0.4039 | 0.0451 |
| OLIGO_07379 | AW465458 | C1orf54   | -0.2741 | 0.5531 | 0.7263  | 0.1013 | 0.5122  | 0.1586 | 0.2531  | 0.4233 |
| OLIGO_00383 | AW465461 | MME       | 0.4552  | 0.4859 | -1.0437 | 0.0880 | 2.0740  | 0.0001 | 2.1052  | 0.0000 |
| OLIGO_10866 | AW465463 | EGLN2     | -0.2892 | 0.4824 | 0.7240  | 0.1436 | -0.6726 | 0.2164 | -0.2555 | 0.4982 |
| OLIGO_03877 | AW465465 | FAM55C    | 1.3605  | 0.0000 | -1.2327 | 0.0001 | -0.8427 | 0.0012 | -0.3979 | 0.0810 |
| OLIGO_07046 | AW465466 | GNG5      | 0.4644  | 0.0694 | -0.6353 | 0.0076 | 0.1596  | 0.4312 | 0.1522  | 0.3846 |
| OLIGO_08178 | AW465469 | EXOSC1    | -0.4527 | 0.5370 | -1.4327 | 0.0281 | 0.1696  | 0.7671 | -0.0918 | 0.8564 |
| OLIGO_08647 | AW465471 | PSMB5     | 0.2201  | 0.7023 | -0.5693 | 0.2908 | -0.5942 | 0.1885 | -0.3007 | 0.4468 |
| OLIGO_10828 | AW465472 | ZNF281    | -0.0256 | 0.9484 | -0.8289 | 0.0252 | 0.4242  | 0.1723 | 0.4153  | 0.1264 |
| OLIGO_08648 | AW465475 | INSIG2    | 1.0232  | 0.0570 | -1.3017 | 0.0239 | 0.3855  | 0.3737 | 0.6290  | 0.1807 |
| OLIGO_06113 | AW465478 | FARSLA    | 0.0464  | 0.8936 | 0.2918  | 0.3695 | 0.1057  | 0.6999 | -0.0508 | 0.8313 |
| OLIGO_06107 | AW465485 | COQ5      | 0.1240  | 0.7278 | -0.3364 | 0.3592 | -0.3300 | 0.3731 | -0.4626 | 0.3001 |
| OLIGO_10180 | AW465489 | HS2ST1    | -0.2104 | 0.5167 | 0.2284  | 0.4518 | -0.2652 | 0.2973 | -0.2908 | 0.1918 |
| OLIGO_03878 | AW465490 | OLFML2A   | 0.0450  | 0.9622 | 0.1708  | 0.8546 | -0.5393 | 0.5594 | 0.2542  | 0.7778 |
| OLIGO_09342 | AW465497 | KLHDC3    | -0.5806 | 0.0890 | 0.5656  | 0.0736 | 0.6728  | 0.0135 | 0.7672  | 0.0013 |
| OLIGO_06126 | AW465500 | VEGFB     | -0.1809 | 0.6214 | 0.3484  | 0.3330 | 0.1405  | 0.6635 | -0.0036 | 0.9905 |
| OLIGO_10829 | AW465501 | ROBO4     | 0.3373  | 0.3595 | 0.0326  | 0.9245 | 0.3508  | 0.2240 | 0.0073  | 0.9769 |
| OLIGO_03880 | AW465507 | LOC497190 | -0.0003 | 0.9993 | 0.1899  | 0.5576 | -0.4782 | 0.0795 | -0.2760 | 0.2428 |
| OLIGO_08757 | AW465512 | FAM96A    | 0.3900  | 0.2758 | -0.9602 | 0.0043 | -0.0336 | 0.9045 | 0.0156  | 0.9494 |
| OLIGO_06138 | AW465514 | COPE      | 0.2208  | 0.5281 | 0.2662  | 0.4281 | 0.1967  | 0.4715 | 0.3268  | 0.1762 |
| OLIGO_06039 | AW465516 | FCGR3B    | 0.2420  | 0.7847 | 0.0189  | 0.9824 | 0.2044  | 0.8037 | 0.2072  | 0.7931 |
| OLIGO_06121 | AW465522 | C18orf30  | 0.3312  | 0.4212 | -0.1410 | 0.7192 | 0.4323  | 0.1489 | 0.5065  | 0.0559 |
| OLIGO_03873 | AW465535 | MAN2A1    | -0.2918 | 0.5296 | 0.1122  | 0.7977 | 1.9046  | 0.0000 | 1.8050  | 0.0000 |
| OLIGO_11405 | AW465539 | LOC534323 | 1.3413  | 0.0004 | -1.9437 | 0.0000 | 0.1612  | 0.5917 | 0.0167  | 0.9485 |
| OLIGO_06109 | AW465545 | PLEKHA8   | 0.2063  | 0.7173 | 0.0044  | 0.9930 | 0.0961  | 0.8271 | 0.0900  | 0.8145 |
| OLIGO_10157 | AW465546 | SSRP1     | -0.4069 | 0.2136 | -0.0266 | 0.9302 | -0.0987 | 0.7034 | -0.4048 | 0.0716 |
| OLIGO_06135 | AW465550 | CTSE      | -0.7620 | 0.6478 | 0.0790  | 0.9586 | 4.9325  | 0.0000 | 4.0698  | 0.0000 |
| OLIGO_03874 | AW465553 | VPS13A    | 0.2070  | 0.6245 | -0.2509 | 0.5359 | -0.1060 | 0.7675 | -0.1827 | 0.6006 |
| OLIGO_06591 | AW465555 | CAPZA1    | 0.2912  | 0.3191 | -0.3613 | 0.1857 | 0.0221  | 0.9233 | 0.0635  | 0.7517 |
| OLIGO_06620 | AW465559 | C10orf118 | 1.6794  | 0.0009 | -1.8294 | 0.0001 | 1.1922  | 0.0030 | 1.1813  | 0.0007 |
| OLIGO_06110 | AW465565 | PWP1      | 0.0666  | 0.8906 | -0.4266 | 0.3466 | -0.7485 | 0.0495 | -0.3478 | 0.3009 |
| OLIGO_08307 | AW465566 | TGM2      | 0.1683  | 0.5307 | 0.0719  | 0.7684 | -0.1129 | 0.5898 | 0.1729  | 0.3380 |
| OLIGO_06130 | AW465567 | BCAP31    | 0.8922  | 0.0278 | -0.7960 | 0.0358 | 0.0671  | 0.8323 | 0.0315  | 0.9097 |

|             |          |               |         |        |         |        |         |        |         |        |
|-------------|----------|---------------|---------|--------|---------|--------|---------|--------|---------|--------|
| OLIGO_08643 | AW465570 | SH3D19        | -0.1697 | 0.6314 | 0.3488  | 0.2918 | 0.8443  | 0.0025 | 1.2285  | 0.0000 |
| OLIGO_07141 | AW465571 | MALAT1        | 0.3996  | 0.4271 | -0.5409 | 0.2506 | -0.4272 | 0.2791 | -0.4940 | 0.1545 |
| OLIGO_08644 | AW465577 | OTUB1         | 0.2424  | 0.3526 | -0.0288 | 0.9059 | -0.0894 | 0.6619 | -0.0506 | 0.7782 |
| OLIGO_03875 | AW465578 | PGS1          | 0.7538  | 0.2360 | -0.7514 | 0.2209 | 0.8176  | 0.1936 | 0.1801  | 0.7185 |
| OLIGO_06123 | AW465583 | CCNDBP1       | 0.4996  | 0.0440 | -0.4927 | 0.0337 | -0.1742 | 0.3696 | -0.0713 | 0.6757 |
| OLIGO_03876 | AW465587 | MCF2L         | 0.5600  | 0.2460 | -0.3069 | 0.5017 | 0.3543  | 0.3483 | 0.3240  | 0.3272 |
| OLIGO_08732 | AW465588 | PPGB          | 0.3856  | 0.2486 | -0.1619 | 0.6029 | 1.0231  | 0.0001 | 0.9487  | 0.0001 |
| OLIGO_06112 | AW465590 | AAMP          | 0.4098  | 0.1849 | -0.6316 | 0.0292 | 0.1450  | 0.5490 | 0.0569  | 0.7883 |
| OLIGO_06116 | AW465591 | CDK2          | 0.0325  | 0.9184 | -0.4053 | 0.2146 | -0.8713 | 0.0428 | -0.5359 | 0.1405 |
| OLIGO_02482 | AW465592 | DNAJC17       | 0.2952  | 0.7118 | -0.3410 | 0.6481 | -0.6351 | 0.3106 | -0.4103 | 0.4542 |
| OLIGO_08654 | AW465595 | TSPAN14       | 0.7002  | 0.1039 | -1.2561 | 0.0018 | 1.1495  | 0.0008 | 1.0750  | 0.0003 |
| OLIGO_06122 | AW465603 | C2orf32       | -0.5255 | 0.1310 | 0.5910  | 0.0712 | 0.6310  | 0.0209 | 0.3977  | 0.0958 |
| OLIGO_06527 | AW465609 | CITED1        | 0.8836  | 0.2337 | -1.7022 | 0.0475 | 2.3566  | 0.0367 | 1.9818  | 0.0829 |
| OLIGO_08657 | AW465613 | HSPA14        | 0.2162  | 0.6199 | -0.2157 | 0.6076 | 0.1031  | 0.7520 | 0.1358  | 0.6346 |
| OLIGO_08658 | AW465616 | TRIM24        | 0.7561  | 0.0362 | -1.2966 | 0.0001 | -0.2588 | 0.3630 | -0.0979 | 0.6923 |
| OLIGO_03881 | AW465617 | ZNF654        | 0.3396  | 0.4053 | -0.5366 | 0.2766 | -0.5493 | 0.2736 | 0.0568  | 0.8349 |
| OLIGO_06118 | AW465627 | TARBP1        | 0.9988  | 0.0005 | -1.2986 | 0.0000 | -0.1796 | 0.4267 | -0.1917 | 0.3278 |
| OLIGO_03882 | AW465633 | RSN           | 1.3332  | 0.0295 | -1.9606 | 0.0030 | -0.0330 | 0.9497 | 0.0302  | 0.9522 |
| OLIGO_03883 | AW465639 | TLN2          | 0.8148  | 0.4438 | -0.7360 | 0.4810 | 0.2737  | 0.7911 | 0.8020  | 0.4307 |
| OLIGO_00228 | AW465641 | TBC1D12       | 0.0272  | 0.9387 | 0.5046  | 0.1278 | -0.9073 | 0.0012 | -0.6066 | 0.0128 |
| OLIGO_11408 | AW465656 | EFNB2         | -0.0572 | 0.9265 | -0.4506 | 0.4375 | 1.2041  | 0.0136 | 1.2235  | 0.0042 |
| OLIGO_09987 | AW465659 | ATF5          | 0.5583  | 0.1159 | 0.1881  | 0.5430 | 0.1768  | 0.5460 | 0.4042  | 0.2100 |
| OLIGO_06159 | AW465664 | SERTAD2       | 0.2216  | 0.4357 | -0.3407 | 0.2003 | -0.1140 | 0.6089 | -0.4639 | 0.0177 |
| OLIGO_06143 | AW465669 | MBD4          | 0.1051  | 0.8539 | 0.4353  | 0.4112 | -0.0147 | 0.9736 | -0.0869 | 0.8243 |
| OLIGO_06180 | AW465670 | POLG          | -0.3945 | 0.1874 | 0.1282  | 0.6467 | -0.0913 | 0.6969 | -0.1346 | 0.5118 |
| OLIGO_06149 | AW465674 | BLCAP         | -0.6117 | 0.0349 | 0.2078  | 0.4387 | 0.1206  | 0.5992 | -0.1561 | 0.4316 |
| OLIGO_09412 | AW465678 | TRAF4         | -0.2443 | 0.3594 | 0.2095  | 0.4005 | 0.4090  | 0.0509 | 0.2753  | 0.1328 |
| OLIGO_06184 | AW465679 | VPS26B        | 0.2004  | 0.7465 | -0.0277 | 0.9631 | -0.6520 | 0.2776 | -0.3398 | 0.5457 |
| OLIGO_06170 | AW465683 | ZNF677        | 0.0291  | 0.9466 | -0.3204 | 0.4304 | 0.5423  | 0.1117 | 0.5726  | 0.0552 |
| OLIGO_08459 | AW465690 | SLPI          | 0.1094  | 0.7484 | 0.1356  | 0.6706 | 0.0404  | 0.8798 | 0.0986  | 0.6744 |
| OLIGO_06144 | AW465691 | LOC158563     | 0.4435  | 0.4646 | -1.3329 | 0.0186 | 1.4635  | 0.0027 | 1.1049  | 0.0087 |
| OLIGO_03884 | AW465694 | 4932413O14Rik | 0.7375  | 0.0640 | -0.0500 | 0.8927 | 0.2341  | 0.4656 | 0.0952  | 0.7326 |
| OLIGO_06160 | AW465696 | NFATC1        | 0.4742  | 0.4021 | -0.5655 | 0.3074 | 0.1982  | 0.5422 | -0.1007 | 0.7232 |
| OLIGO_11236 | AW465700 | XAB1          | 0.5092  | 0.2361 | -0.5614 | 0.1625 | 0.0143  | 0.9661 | -0.1728 | 0.5576 |

|             |          |          |         |        |         |        |         |        |         |        |
|-------------|----------|----------|---------|--------|---------|--------|---------|--------|---------|--------|
| OLIGO_03885 | AW465701 | RCOR1    | 0.4392  | 0.3767 | -0.5825 | 0.1948 | -0.0532 | 0.8855 | -0.3325 | 0.3039 |
| OLIGO_06181 | AW465702 | C10orf28 | 0.1286  | 0.7182 | -0.1926 | 0.5634 | 0.3751  | 0.1796 | -0.0447 | 0.8549 |
| OLIGO_06175 | AW465706 | TOPORS   | 0.5065  | 0.1768 | -0.6500 | 0.0631 | 0.1465  | 0.6206 | 0.1021  | 0.6928 |
| OLIGO_06854 | AW465708 | ACIN1    | -0.0276 | 0.9282 | -0.2143 | 0.4526 | -0.0192 | 0.9370 | -0.0536 | 0.7992 |
| OLIGO_06147 | AW465712 | SEC61A1  | -0.2093 | 0.4952 | 0.0984  | 0.7304 | 0.1467  | 0.5456 | 0.1628  | 0.4410 |
| OLIGO_10712 | AW465714 | BSG      | 0.5044  | 0.2540 | -0.9637 | 0.0200 | -0.6516 | 0.0614 | -0.5592 | 0.0661 |
| OLIGO_06176 | AW465715 | Ptpmt1   | -0.3422 | 0.1602 | 0.3801  | 0.0950 | -0.0435 | 0.8203 | -0.1881 | 0.2609 |
| OLIGO_09985 | AW465716 | CENP-A   | -0.4843 | 0.2661 | 0.1419  | 0.7258 | -0.7706 | 0.0259 | -0.4692 | 0.1171 |
| OLIGO_10731 | AW465723 | MAST2    | -0.7414 | 0.0318 | 0.8209  | 0.0107 | 0.3047  | 0.2640 | -0.0455 | 0.8480 |
| OLIGO_06154 | AW465726 | RIPK2    | -0.0841 | 0.8856 | 0.3288  | 0.5474 | -0.8690 | 0.0587 | -0.1874 | 0.6440 |
| OLIGO_06167 | AW465731 | TCF19    | 0.3510  | 0.2821 | -0.7974 | 0.0071 | -0.2948 | 0.2282 | -0.1325 | 0.5323 |
| OLIGO_07071 | AW465735 | SIKE     | -0.0373 | 0.9232 | -0.8950 | 0.0138 | 0.2079  | 0.4938 | 0.4285  | 0.1074 |
| OLIGO_06171 | AW465736 | SORD     | 0.9623  | 0.0067 | -1.5905 | 0.0000 | 0.5106  | 0.0696 | -0.0304 | 0.8994 |
| OLIGO_06178 | AW465739 | IMMP2L   | -0.1576 | 0.7688 | 0.5085  | 0.3109 | -0.5615 | 0.1823 | -0.5930 | 0.1090 |
| OLIGO_08143 | AW465745 | PKN1     | -0.7166 | 0.0939 | 0.7699  | 0.0820 | -0.4480 | 0.2426 | -0.3507 | 0.3352 |
| OLIGO_02876 | AW465750 | YY1      | 0.5118  | 0.1405 | -0.6503 | 0.0455 | -0.7172 | 0.0086 | -0.5415 | 0.0233 |
| OLIGO_06140 | AW465754 | EIF4B    | -0.2860 | 0.3533 | 0.8836  | 0.0022 | -0.8635 | 0.0005 | -0.7141 | 0.0008 |
| OLIGO_06157 | AW465760 | UTP11L   | 0.4531  | 0.1160 | -0.9969 | 0.0002 | -0.1715 | 0.4532 | -0.1459 | 0.4655 |
| OLIGO_06142 | AW465764 | MARK4    | -1.3124 | 0.2868 | 1.5190  | 0.2090 | 2.9496  | 0.0269 | 2.5930  | 0.0418 |
| OLIGO_06158 | AW465767 | UBE2G2   | 0.8248  | 0.0120 | -0.8621 | 0.0053 | 0.1911  | 0.4556 | 0.3930  | 0.0802 |
| OLIGO_08664 | AW465770 | SPEN     | 0.0265  | 0.9194 | -0.1132 | 0.6441 | -0.1773 | 0.3888 | -0.1445 | 0.4221 |
| OLIGO_03887 | AW465775 | ZNRF1    | -0.0963 | 0.8562 | 0.3435  | 0.4896 | -0.4992 | 0.2309 | -0.3973 | 0.2759 |
| OLIGO_06177 | AW465777 | DCLRE1B  | 0.3623  | 0.4120 | -0.0663 | 0.8724 | -0.5582 | 0.1103 | -1.1075 | 0.0003 |
| OLIGO_11325 | AW465778 | EIF3S6IP | -0.5329 | 0.1478 | 0.0058  | 0.9865 | -0.2292 | 0.4296 | -0.6098 | 0.0167 |
| OLIGO_08666 | AW465784 | FAU      | 0.1867  | 0.6677 | -0.0763 | 0.8537 | 0.0271  | 0.9342 | 0.1291  | 0.6520 |
| OLIGO_11115 | AW465786 | TSPAN3   | -0.5751 | 0.1210 | 0.5358  | 0.1221 | -0.8264 | 0.0047 | -0.3948 | 0.1209 |
| OLIGO_08667 | AW465789 | PTDSS1   | -0.4139 | 0.2165 | 0.5286  | 0.0917 | -0.0748 | 0.7756 | 0.0535  | 0.8159 |
| OLIGO_06185 | AW465793 | TRIM65   | -0.0305 | 0.9379 | 0.2474  | 0.4996 | -0.0748 | 0.8078 | -0.1864 | 0.4901 |
| OLIGO_06150 | AW465795 | PFDN1    | 0.0566  | 0.9007 | -0.6049 | 0.1529 | -0.0661 | 0.8533 | -0.4053 | 0.1938 |
| OLIGO_07715 | AW465802 | RTN4     | 0.0268  | 0.9594 | 0.5875  | 0.2333 | -0.2728 | 0.5088 | -0.3742 | 0.3007 |
| OLIGO_03888 | AW465803 | AK3L1    | 0.2957  | 0.5999 | -0.1900 | 0.7119 | 0.4447  | 0.3084 | -0.0792 | 0.8376 |
| OLIGO_08004 | AW465805 | DUT      | -0.5026 | 0.4166 | 0.5206  | 0.3682 | -1.5981 | 0.0010 | -1.6643 | 0.0001 |
| OLIGO_08668 | AW465807 | CSNK1A1  | 0.2351  | 0.5261 | -0.4848 | 0.1626 | 0.1758  | 0.5453 | 0.5644  | 0.0269 |
| OLIGO_08669 | AW465808 | LRRC51   | 0.2814  | 0.5882 | -0.6925 | 0.1411 | 0.8854  | 0.0222 | 0.1977  | 0.5597 |

|             |          |           |         |        |         |        |         |        |         |        |
|-------------|----------|-----------|---------|--------|---------|--------|---------|--------|---------|--------|
| OLIGO_11108 | AW465809 | ITM2B     | 0.8377  | 0.1661 | -1.1715 | 0.0387 | -1.0724 | 0.0240 | -0.4350 | 0.2943 |
| OLIGO_11153 | AW465811 | GMIP      | 0.2778  | 0.3433 | 0.5840  | 0.0342 | -0.1954 | 0.3973 | -0.0277 | 0.8905 |
| OLIGO_08670 | AW465812 | ECHDC2    | 0.3583  | 0.2293 | -0.4256 | 0.1269 | -0.0908 | 0.6971 | -0.0844 | 0.6793 |
| OLIGO_06152 | AW465814 | LOC540037 | 0.0141  | 0.9677 | 0.5102  | 0.1185 | 0.2690  | 0.3255 | 0.2022  | 0.3985 |
| OLIGO_11411 | AW465817 | NDUFS2    | 0.5819  | 0.0092 | -0.7059 | 0.0007 | -0.1817 | 0.3039 | -0.1707 | 0.2624 |
| OLIGO_10396 | AW465820 | BDH2      | -0.3194 | 0.5145 | 0.7735  | 0.0919 | 0.1314  | 0.7322 | 0.2779  | 0.4084 |
| OLIGO_10467 | AW465831 | TMEM4     | -0.3109 | 0.3306 | -0.0701 | 0.8145 | 0.2388  | 0.3411 | -0.1781 | 0.4218 |
| OLIGO_03406 | AW465832 | SERP1     | -0.1966 | 0.7389 | 0.3571  | 0.5175 | -0.3712 | 0.4259 | -0.3155 | 0.4367 |
| OLIGO_10402 | AW465836 | VAMP3     | 0.3193  | 0.2431 | -0.6631 | 0.0098 | 0.3580  | 0.0952 | 0.3455  | 0.0659 |
| OLIGO_06153 | AW465842 | LOC539899 | 1.1319  | 0.2099 | -0.2670 | 0.7490 | -0.9583 | 0.2474 | -0.6440 | 0.3995 |
| OLIGO_06161 | AW465843 | C6orf55   | 0.2007  | 0.5515 | -0.8232 | 0.0089 | 0.2742  | 0.3050 | 0.2918  | 0.2076 |
| OLIGO_08673 | AW465847 | CSNK1E    | -1.2070 | 0.0001 | 1.2712  | 0.0000 | -0.0232 | 0.9231 | 0.0141  | 0.9464 |
| OLIGO_06183 | AW465849 | PCBP4     | 0.1462  | 0.8708 | -0.8566 | 0.1301 | -0.0993 | 0.7304 | -0.1567 | 0.5345 |
| OLIGO_06186 | AW465850 | PWWP2     | -0.9937 | 0.1631 | 0.9742  | 0.1587 | 0.3879  | 0.4239 | 0.2340  | 0.5815 |
| OLIGO_06155 | AW465852 | FBXL17    | 1.1344  | 0.0095 | -0.3497 | 0.3908 | -0.8288 | 0.0155 | -0.6023 | 0.0443 |
| OLIGO_07971 | AW465855 | EPB41     | -0.6410 | 0.2674 | 1.2682  | 0.0507 | -0.5680 | 0.2961 | -0.4426 | 0.3875 |
| OLIGO_08009 | AW465859 | RPUSD3    | 0.3086  | 0.3503 | -0.4979 | 0.1075 | -0.5463 | 0.0356 | -0.4608 | 0.0448 |
| OLIGO_11047 | AW465872 | MRPL50    | 0.6783  | 0.0400 | -1.3306 | 0.0000 | -0.6304 | 0.0157 | -0.3918 | 0.0841 |
| OLIGO_10832 | AW465873 | DHX9      | 0.3729  | 0.3741 | -0.5466 | 0.1900 | -0.8744 | 0.0450 | -0.5507 | 0.1644 |
| OLIGO_08675 | AW465881 | NFKB1     | 0.0306  | 0.9411 | 0.0767  | 0.8429 | 0.1533  | 0.6324 | 0.0974  | 0.7266 |
| OLIGO_03891 | AW465883 | WDR33     | 0.7528  | 0.0183 | -0.4586 | 0.1203 | -0.5100 | 0.0440 | -0.0397 | 0.8554 |
| OLIGO_06156 | AW465886 | DYRK1A    | 0.1387  | 0.5868 | -0.2218 | 0.3503 | -0.1908 | 0.3456 | 0.1782  | 0.3098 |
| OLIGO_06163 | AW465887 | VEGF      | -0.2690 | 0.5254 | 0.3105  | 0.4323 | -0.3368 | 0.3072 | -0.0639 | 0.8265 |
| OLIGO_06169 | AW465888 | ERCC8     | 0.2162  | 0.5050 | -0.3676 | 0.2244 | -0.0775 | 0.7620 | -0.2827 | 0.2053 |
| OLIGO_08677 | AW465892 | MPG       | -0.4656 | 0.0721 | 0.4107  | 0.0897 | -0.0326 | 0.8723 | -0.0421 | 0.8124 |
| OLIGO_03801 | AW465902 | C10orf26  | 0.2815  | 0.4086 | -0.5595 | 0.0795 | 0.3013  | 0.2592 | 0.1754  | 0.4528 |
| OLIGO_06216 | AW465906 | DNPEP     | -0.2902 | 0.5748 | 0.1940  | 0.6884 | 0.4992  | 0.2194 | 0.2517  | 0.4832 |
| OLIGO_10408 | AW465907 | NSFL1C    | 0.4082  | 0.1548 | -0.7508 | 0.0050 | 0.8367  | 0.0003 | 0.6380  | 0.0013 |
| OLIGO_06196 | AW465908 | LOC253012 | -0.1261 | 0.9227 | -0.2261 | 0.8665 | 1.7401  | 0.1275 | 1.4330  | 0.1849 |
| OLIGO_07267 | AW465909 | HSPA9B    | 1.3084  | 0.0553 | -1.5530 | 0.0151 | -1.3897 | 0.0095 | -1.1897 | 0.0112 |
| OLIGO_06188 | AW465913 | C6orf120  | -0.8042 | 0.0095 | 0.2658  | 0.3567 | -0.1369 | 0.5731 | 0.0156  | 0.9421 |
| OLIGO_06191 | AW465914 | TMEM50A   | 0.2352  | 0.5373 | -0.3749 | 0.2933 | -0.6648 | 0.0265 | -0.1423 | 0.5865 |
| OLIGO_08371 | AW465915 | ARFGAP1   | -0.4604 | 0.1720 | 0.7082  | 0.0249 | 0.0459  | 0.8620 | -0.0273 | 0.9058 |
| OLIGO_08680 | AW465924 | LOC513673 | -0.4328 | 0.0485 | 0.5066  | 0.0131 | -0.0606 | 0.7269 | 0.1371  | 0.3617 |

|             |          |           |         |        |         |        |         |        |         |        |
|-------------|----------|-----------|---------|--------|---------|--------|---------|--------|---------|--------|
| OLIGO_11479 | AW465927 | TM2D1     | 0.1335  | 0.6394 | 0.1331  | 0.6174 | -0.0732 | 0.7430 | 0.1017  | 0.6028 |
| OLIGO_03892 | AW465929 | UBE2E3    | 0.0003  | 0.9993 | -0.2302 | 0.4114 | -0.0856 | 0.7201 | 0.0424  | 0.8377 |
| OLIGO_11413 | AW465930 | CRY2      | 0.7728  | 0.0280 | -0.3073 | 0.3507 | -0.1709 | 0.5433 | 0.1334  | 0.5853 |
| OLIGO_06224 | AW465932 | ASF1A     | 0.1223  | 0.7597 | -0.8918 | 0.0174 | -0.0310 | 0.9211 | 0.1402  | 0.6092 |
| OLIGO_08681 | AW465947 | CAPN2     | 0.8207  | 0.0536 | -1.1057 | 0.0267 | 0.1022  | 0.7234 | 0.1867  | 0.5354 |
| OLIGO_06213 | AW465953 | NSD1      | 0.0523  | 0.9018 | 0.3412  | 0.4183 | 0.2977  | 0.4546 | 0.4236  | 0.2968 |
| OLIGO_07722 | AW465956 | C1orf93   | -0.7352 | 0.0024 | 0.6387  | 0.0046 | -0.6481 | 0.0007 | -0.6666 | 0.0001 |
| OLIGO_03893 | AW465959 | SENP8     | -0.1204 | 0.8270 | -0.0798 | 0.8769 | 0.5770  | 0.2045 | -0.1253 | 0.7532 |
| OLIGO_03894 | AW465966 | VPS16     | 0.3496  | 0.3803 | -0.4885 | 0.2194 | -0.5160 | 0.1902 | -0.1745 | 0.5933 |
| OLIGO_06192 | AW465967 | DBNDD1    | 0.8932  | 0.2065 | -0.8002 | 0.2458 | 0.5739  | 0.3759 | 0.5192  | 0.4059 |
| OLIGO_06877 | AW465971 | SEPP1     | 0.6533  | 0.2974 | -1.1310 | 0.0528 | 2.4539  | 0.0000 | 2.4010  | 0.0000 |
| OLIGO_06220 | AW465975 | TEAD4     | 0.2965  | 0.5025 | 0.0595  | 0.8862 | 0.7307  | 0.0305 | 0.8215  | 0.0050 |
| OLIGO_08487 | AW465978 | GADD45A   | -0.1524 | 0.7419 | -0.5210 | 0.2291 | 1.0154  | 0.0053 | 0.5729  | 0.0718 |
| OLIGO_06193 | AW465980 | HTLF      | 0.2412  | 0.5033 | -0.5283 | 0.1174 | 0.3314  | 0.2407 | 0.2962  | 0.2311 |
| OLIGO_06207 | AW465994 | GNB2      | -0.4606 | 0.0787 | 0.3632  | 0.1380 | -0.0146 | 0.9430 | -0.1656 | 0.3562 |
| OLIGO_06199 | AW466001 | BAD       | 0.1208  | 0.7433 | 0.3890  | 0.2555 | 0.6621  | 0.0245 | 0.4901  | 0.0532 |
| OLIGO_06221 | AW466005 | PLA1A     | -0.3258 | 0.3924 | 0.0641  | 0.8505 | 0.2705  | 0.3024 | 0.0790  | 0.7305 |
| OLIGO_06190 | AW466008 | CTAGE5    | 0.4891  | 0.1859 | 0.1061  | 0.7476 | 0.0176  | 0.9546 | -0.1664 | 0.5833 |
| OLIGO_06200 | AW466009 | TIMM8A    | 1.0058  | 0.0179 | -1.1709 | 0.0033 | -0.2520 | 0.4479 | -0.2718 | 0.3500 |
| OLIGO_06187 | AW466012 | PDK3      | 0.5965  | 0.3625 | -0.7522 | 0.2502 | 0.1306  | 0.8169 | 0.2112  | 0.6978 |
| OLIGO_06222 | AW466013 | RIPK1     | -0.3032 | 0.2339 | 0.2635  | 0.2669 | -0.0693 | 0.7325 | 0.1092  | 0.5332 |
| OLIGO_03895 | AW466016 | WBP5      | -0.2057 | 0.7580 | -0.4493 | 0.4614 | 0.8653  | 0.0933 | 0.6638  | 0.1672 |
| OLIGO_06867 | AW466020 | CTSF      | -0.1228 | 0.7609 | -0.0860 | 0.8197 | -0.5287 | 0.0978 | -0.2579 | 0.3528 |
| OLIGO_11445 | AW466022 | FLJ13576  | 0.1768  | 0.5546 | 0.1827  | 0.5133 | 0.2183  | 0.3533 | 0.1983  | 0.3346 |
| OLIGO_08911 | AW466023 | SF3B1     | 0.2515  | 0.4902 | -0.1490 | 0.6692 | -0.1648 | 0.5661 | -0.1660 | 0.5057 |
| OLIGO_03896 | AW466027 | NHEJ1     | -0.2210 | 0.4759 | -0.2370 | 0.4110 | -0.3380 | 0.1737 | -0.3341 | 0.1282 |
| OLIGO_03897 | AW466028 | C1orf21   | -0.9644 | 0.0143 | 1.4010  | 0.0002 | -0.6556 | 0.0385 | -0.9505 | 0.0007 |
| OLIGO_06208 | AW466039 | BC055107  | -1.5412 | 0.0002 | 1.6325  | 0.0000 | 0.3596  | 0.2653 | 0.1047  | 0.7076 |
| OLIGO_06209 | AW466048 | FURIN     | 1.0060  | 0.1299 | -0.7873 | 0.2232 | 1.3028  | 0.0022 | 1.0144  | 0.0063 |
| OLIGO_06223 | AW466051 | ADSL      | -0.0089 | 0.9780 | -0.9986 | 0.0010 | -0.8700 | 0.0007 | -0.7208 | 0.0012 |
| OLIGO_07107 | AW466055 | ATP5B     | 0.2677  | 0.5892 | -0.5950 | 0.1989 | -0.4398 | 0.2602 | -0.6932 | 0.0424 |
| OLIGO_06211 | AW466063 | LOC515049 | 0.0743  | 0.8924 | -0.0502 | 0.9241 | -0.6095 | 0.2586 | -0.1514 | 0.7357 |
| OLIGO_06205 | AW466070 | KIFC3     | 0.2353  | 0.3938 | -0.2109 | 0.4137 | 0.5198  | 0.0165 | 0.3628  | 0.0557 |
| OLIGO_03639 | AW466074 | CFL1      | 0.5587  | 0.4794 | -0.7827 | 0.2896 | -0.7546 | 0.2230 | -0.5617 | 0.3001 |

|             |          |           |         |        |         |        |         |        |         |        |
|-------------|----------|-----------|---------|--------|---------|--------|---------|--------|---------|--------|
| OLIGO_04341 | AW466075 | TP53I11   | -0.1437 | 0.8032 | 0.0643  | 0.9036 | 0.0914  | 0.8370 | -0.3022 | 0.4371 |
| OLIGO_03644 | AW466077 | DDX47     | 0.1175  | 0.7039 | -0.3915 | 0.1763 | 0.1507  | 0.5377 | 0.0120  | 0.9549 |
| OLIGO_03900 | AW466079 | ENPEP     | -0.7871 | 0.4160 | -0.5640 | 0.5332 | 1.7381  | 0.0253 | 2.7156  | 0.0001 |
| OLIGO_06197 | AW466083 | ZDHHC5    | -0.1360 | 0.7571 | -0.3169 | 0.4411 | 0.6321  | 0.0672 | 0.2993  | 0.3214 |
| OLIGO_06214 | AW466086 | FBXO32    | 0.9096  | 0.5354 | 2.6851  | 0.1901 | 0.9302  | 0.1805 | 1.8061  | 0.0033 |
| OLIGO_06219 | AW466087 | IFI6      | -0.9209 | 0.0344 | 0.9890  | 0.0152 | -0.8896 | 0.0099 | -0.3359 | 0.2610 |
| OLIGO_03901 | AW466088 | ADAM19    | -0.4434 | 0.4371 | 0.3919  | 0.4628 | 0.1922  | 0.6672 | 0.8150  | 0.0378 |
| OLIGO_10834 | AW466092 | C1orf78   | -0.7411 | 0.0082 | 0.9376  | 0.0003 | -0.4161 | 0.0598 | -0.3805 | 0.0477 |
| OLIGO_11416 | AW466093 | Cyhr1     | -0.4294 | 0.3423 | 0.1830  | 0.6651 | -0.2920 | 0.4751 | 0.0049  | 0.9896 |
| OLIGO_03902 | AW466094 | LOC648591 | 0.5516  | 0.1258 | -0.2448 | 0.4670 | -1.0673 | 0.0002 | -0.7455 | 0.0030 |
| OLIGO_03903 | AW466096 | PARN      | 0.1516  | 0.5948 | -0.4117 | 0.1193 | -0.0547 | 0.8091 | 0.3267  | 0.0947 |
| OLIGO_03904 | AW466097 | IGSF2     | -0.4310 | 0.4837 | 0.4110  | 0.4732 | 1.1101  | 0.0984 | 0.9774  | 0.1422 |
| OLIGO_07927 | AW466104 | DSTN      | 0.5581  | 0.0363 | -0.4123 | 0.0964 | -0.2666 | 0.2049 | -0.2647 | 0.1479 |
| OLIGO_07497 | AW466110 | EWSR1     | -0.1404 | 0.5364 | 0.0211  | 0.9201 | 0.3352  | 0.0642 | 0.0864  | 0.5783 |
| OLIGO_11193 | AW466113 | FLJ11806  | -0.0083 | 0.9761 | -0.6342 | 0.0146 | 0.0207  | 0.9246 | 0.1596  | 0.4015 |
| OLIGO_06206 | AW466122 | NHLRC2    | -0.0969 | 0.8350 | -0.3248 | 0.4606 | 0.0341  | 0.9248 | 0.4714  | 0.1379 |
| OLIGO_01829 | AW466123 | PLCL2     | -0.8545 | 0.0326 | 0.8766  | 0.0185 | 0.1921  | 0.5430 | 0.2153  | 0.4317 |
| OLIGO_06215 | AW466124 | COPS2     | 0.7208  | 0.4575 | -1.0138 | 0.2641 | -0.9698 | 0.2024 | -0.8399 | 0.2073 |
| OLIGO_08419 | AW466128 | MGC10433  | 0.3521  | 0.2622 | -0.6048 | 0.0856 | -0.1211 | 0.6416 | 0.1813  | 0.5002 |
| OLIGO_06554 | AW466134 | AASDHPPT  | 0.7173  | 0.1203 | -0.5611 | 0.1936 | -0.2863 | 0.4283 | -0.3848 | 0.2242 |
| OLIGO_03905 | AW466135 | LOC535927 | 0.5014  | 0.4054 | -0.6114 | 0.2987 | 0.7829  | 0.1762 | 1.1102  | 0.0742 |
| OLIGO_11267 | AW466136 | ITGB2     | 0.4972  | 0.3424 | -0.5188 | 0.2895 | -0.2783 | 0.4975 | -0.4214 | 0.2408 |
| OLIGO_03945 | AW466137 | SOAT1     | 0.8102  | 0.1850 | -1.0681 | 0.0846 | -0.1397 | 0.7860 | 0.1053  | 0.8282 |
| OLIGO_08688 | AW466138 | Als4      | 0.5847  | 0.0436 | -0.5280 | 0.0509 | -0.4432 | 0.0522 | -0.2104 | 0.2950 |
| OLIGO_10456 | AW466140 | ODF2      | 0.1704  | 0.6908 | -0.2325 | 0.5617 | 0.1630  | 0.6274 | -0.3858 | 0.1898 |
| OLIGO_01489 | AW466144 | KEAP1     | -0.4637 | 0.2099 | 0.6612  | 0.0562 | -0.3292 | 0.2560 | -0.3975 | 0.1173 |
| OLIGO_08689 | AW466145 | CD48      | 2.7139  | 0.0000 | -2.7020 | 0.0000 | 0.4845  | 0.2613 | 0.4882  | 0.1887 |
| OLIGO_06876 | AW466147 | ANXA2     | 0.2502  | 0.5743 | -1.3514 | 0.0013 | -1.2687 | 0.0003 | -0.8932 | 0.0036 |
| OLIGO_03906 | AW466149 | C1orf168  | -1.0161 | 0.0518 | 0.7588  | 0.1102 | 1.7681  | 0.0000 | 1.4179  | 0.0000 |
| OLIGO_01134 | AW466155 | RAC3      | -0.7802 | 0.4160 | 0.1053  | 0.9057 | -1.0425 | 0.2676 | -0.6628 | 0.4373 |
| OLIGO_06896 | AW466163 | SSR3      | 0.6839  | 0.0535 | -0.9542 | 0.0041 | 0.6693  | 0.0160 | 0.6067  | 0.0127 |
| OLIGO_10915 | AW466164 | LOC613430 | -1.3470 | 0.0002 | 1.1010  | 0.0010 | -0.2427 | 0.3839 | -0.0499 | 0.8373 |
| OLIGO_11417 | AW466167 | ROCK2     | 0.2549  | 0.4387 | -0.6410 | 0.0788 | -0.6334 | 0.0896 | -0.1477 | 0.5939 |
| OLIGO_03908 | AW466168 | AIP       | 0.4297  | 0.1727 | -0.2675 | 0.3638 | -0.8498 | 0.0006 | -0.7827 | 0.0003 |

|             |          |           |         |        |         |        |         |        |         |        |
|-------------|----------|-----------|---------|--------|---------|--------|---------|--------|---------|--------|
| OLIGO_09025 | AW466169 | PMM1      | 0.7870  | 0.2432 | -0.2894 | 0.6565 | 0.5131  | 0.4245 | 0.1499  | 0.8089 |
| OLIGO_10835 | AW466173 | AQP1      | -0.6862 | 0.1423 | 0.4690  | 0.2833 | 1.0494  | 0.0047 | 0.3979  | 0.2158 |
| OLIGO_02027 | AW466175 | USP47     | -0.3450 | 0.4083 | 0.4626  | 0.2620 | -0.1090 | 0.7695 | -0.1163 | 0.7427 |
| OLIGO_10836 | AW466176 | C1orf107  | -0.0861 | 0.7876 | 0.0681  | 0.8199 | 0.3892  | 0.1208 | 0.1736  | 0.4287 |
| OLIGO_03911 | AW466178 | POLL      | -0.4202 | 0.4396 | 0.3771  | 0.4583 | 0.6170  | 0.1479 | 0.3622  | 0.3316 |
| OLIGO_08690 | AW466182 | LOC529905 | -0.3577 | 0.2692 | 0.8555  | 0.0049 | 0.3598  | 0.1563 | 0.3240  | 0.1448 |
| OLIGO_10072 | AW466183 | MRPL11    | 0.1234  | 0.7567 | -0.3954 | 0.2888 | -0.4798 | 0.1251 | -0.5936 | 0.0310 |
| OLIGO_03912 | AW466185 | WAPAL     | 0.4146  | 0.2367 | -0.5566 | 0.1361 | -0.3925 | 0.2648 | -0.3322 | 0.3424 |
| OLIGO_03913 | AW466186 | C14orf111 | 0.3031  | 0.2464 | -0.9216 | 0.0002 | -0.4231 | 0.0416 | -0.2210 | 0.2186 |
| OLIGO_10715 | AW466188 | DGUOK     | -0.2625 | 0.4546 | 0.2410  | 0.4747 | -0.9806 | 0.0449 | -0.5862 | 0.1463 |
| OLIGO_04035 | AW466189 | CTSH      | 1.1228  | 0.0043 | -0.8866 | 0.0150 | -0.6989 | 0.0246 | -0.0242 | 0.9284 |
| OLIGO_03914 | AW466190 | CYBRD1    | 0.5298  | 0.3871 | -0.1714 | 0.7657 | -1.3032 | 0.0566 | -0.7198 | 0.2123 |
| OLIGO_03915 | AW466194 | ITGA3     | 0.5651  | 0.2297 | -0.3265 | 0.4578 | -0.1144 | 0.7562 | 0.0352  | 0.9132 |
| OLIGO_08691 | AW466195 | EDF1      | -0.3230 | 0.2990 | 0.3524  | 0.2258 | -0.2571 | 0.2915 | -0.2732 | 0.2005 |
| OLIGO_11418 | AW466198 | MSRA      | -0.8626 | 0.1806 | 0.7079  | 0.2531 | -0.3783 | 0.5173 | -0.0561 | 0.9193 |
| OLIGO_06817 | AW466200 | CRABP2    | -2.2410 | 0.0022 | 2.0339  | 0.0029 | 0.7933  | 0.1644 | -0.0020 | 0.9967 |
| OLIGO_10837 | AW466205 | CIDEA     | 0.6681  | 0.2483 | -0.4884 | 0.3798 | 1.5538  | 0.0005 | 2.1533  | 0.0000 |
| OLIGO_03916 | AW466208 | EAF2      | 0.2827  | 0.6172 | -0.1803 | 0.7347 | 1.0764  | 0.0170 | 0.7965  | 0.0430 |
| OLIGO_09227 | AW466209 | LOXL3     | -0.4354 | 0.2674 | 0.4029  | 0.2708 | 1.0294  | 0.0011 | 0.9315  | 0.0006 |
| OLIGO_10546 | AW466210 | DNAJB6    | 0.6581  | 0.0262 | -0.7907 | 0.0041 | -0.1930 | 0.4100 | -0.0637 | 0.7530 |
| OLIGO_06226 | AW466211 | WTAP      | 0.1117  | 0.7789 | -0.2099 | 0.5729 | 0.3216  | 0.3026 | 0.7966  | 0.0037 |
| OLIGO_04690 | BF039020 | KIF2C     | -0.1581 | 0.6884 | 0.3691  | 0.3170 | -0.3141 | 0.3133 | -0.3482 | 0.1991 |
| OLIGO_10004 | BF039021 | KIAA0179  | -0.1801 | 0.5472 | 0.1267  | 0.6503 | -0.0082 | 0.9720 | -0.1820 | 0.3756 |
| OLIGO_04681 | BF039023 | HOOK2     | 0.3097  | 0.6570 | -0.4135 | 0.5461 | 0.4406  | 0.5102 | 0.4619  | 0.4784 |
| OLIGO_09325 | BF039028 | PRKCSH    | -0.2507 | 0.4596 | 0.3438  | 0.2783 | 0.2643  | 0.3199 | 0.3266  | 0.1605 |
| OLIGO_04685 | BF039035 | EEF1E1    | 0.3460  | 0.2721 | -0.0108 | 0.9708 | 0.0062  | 0.9799 | -0.2591 | 0.2358 |
| OLIGO_04682 | BF039039 | CD80      | 0.3723  | 0.7599 | -0.1178 | 0.9473 | -0.0152 | 0.9850 | 0.7285  | 0.3092 |
| OLIGO_04683 | BF039041 | CDC42BPG  | 0.8040  | 0.3035 | -0.5601 | 0.4432 | -0.1402 | 0.8188 | 0.1468  | 0.7841 |
| OLIGO_04693 | BF039045 | DLX5      | .       | .      | -7.7859 | 0.0008 | 2.4245  | 0.0000 | 2.2597  | 0.0000 |
| OLIGO_08699 | BF039051 | PYCR2     | -0.3346 | 0.4233 | -0.7441 | 0.0573 | -0.2637 | 0.4273 | -0.0184 | 0.9492 |
| OLIGO_11669 | BF039061 | GMPPA     | 0.0622  | 0.8292 | 0.2485  | 0.3565 | -0.3938 | 0.0816 | -0.2062 | 0.2970 |
| OLIGO_00347 | BF039065 | 40430.00  | -1.0917 | 0.0077 | 0.6697  | 0.0798 | -1.2157 | 0.0002 | -1.0974 | 0.0001 |
| OLIGO_04696 | BF039066 | SPSB3     | 0.2608  | 0.6454 | -0.6250 | 0.2413 | 0.4164  | 0.3439 | 0.1800  | 0.6364 |
| OLIGO_04695 | BF039067 | ARRB2     | 0.2683  | 0.4827 | 0.3519  | 0.3238 | 1.0791  | 0.0004 | 0.8340  | 0.0016 |

|             |          |           |         |        |         |        |         |        |         |        |
|-------------|----------|-----------|---------|--------|---------|--------|---------|--------|---------|--------|
| OLIGO_04191 | BF039087 | ZNF492    | 0.7148  | 0.2198 | -1.0197 | 0.0615 | 0.3987  | 0.3823 | 0.3171  | 0.4273 |
| OLIGO_04200 | BF039090 | ETV5      | -0.6677 | 0.0773 | 0.1719  | 0.6259 | -0.4621 | 0.1188 | -0.0435 | 0.8665 |
| OLIGO_04198 | BF039097 | ST3GAL1   | -0.2544 | 0.7461 | 0.1367  | 0.8576 | -0.2660 | 0.7183 | 0.2767  | 0.6981 |
| OLIGO_04694 | BF039104 | STS-1     | 0.8161  | 0.0854 | -0.2587 | 0.5380 | 0.9524  | 0.0480 | 0.6286  | 0.1408 |
| OLIGO_04686 | BF039110 | FLJ13197  | 0.5307  | 0.4007 | -0.5514 | 0.3455 | -0.5006 | 0.3030 | -0.6972 | 0.1016 |
| OLIGO_09327 | BF039111 | CDKN1A    | 0.1653  | 0.6476 | 0.2882  | 0.3943 | -0.2980 | 0.2941 | -0.0809 | 0.7470 |
| OLIGO_04687 | BF039112 | C14orf1   | 0.3625  | 0.4896 | -0.2527 | 0.6065 | 0.3847  | 0.3496 | -0.1306 | 0.7167 |
| OLIGO_04691 | BF039118 | MRPL48    | 0.7980  | 0.0771 | -1.2542 | 0.0277 | 0.0308  | 0.9208 | 0.2244  | 0.5058 |
| OLIGO_09550 | BF039125 | LOC505995 | 1.1290  | 0.0037 | -1.0103 | 0.0054 | -0.0087 | 0.9772 | 0.1666  | 0.5318 |
| OLIGO_04704 | BF039131 | CAPN6     | -0.6026 | 0.3637 | 1.2101  | 0.0492 | 2.7095  | 0.0000 | 2.5772  | 0.0000 |
| OLIGO_04700 | BF039138 | PPP1R3C   | 0.6810  | 0.1839 | -0.4864 | 0.3118 | -0.7848 | 0.1234 | -1.1022 | 0.0561 |
| OLIGO_04698 | BF039148 | PLA2R1    | 0.2829  | 0.5083 | -0.0455 | 0.9101 | 0.4101  | 0.1951 | 0.2041  | 0.4658 |
| OLIGO_04195 | BF039154 | STRN4     | 0.4363  | 0.3740 | -0.2932 | 0.5196 | 0.1180  | 0.7592 | 0.0504  | 0.8801 |
| OLIGO_04197 | BF039158 | TTC7B     | 0.2060  | 0.6722 | -0.5253 | 0.2489 | 0.9692  | 0.0114 | 0.5241  | 0.1171 |
| OLIGO_09382 | BF039162 | PSMB6     | -0.0123 | 0.9687 | -0.0499 | 0.8669 | 0.0778  | 0.7800 | -0.0305 | 0.9067 |
| OLIGO_11318 | BF039163 | MMP2      | -2.3807 | 0.0509 | 1.9407  | 0.0927 | 2.7353  | 0.0270 | 1.6986  | 0.1154 |
| OLIGO_07702 | BF039164 | PARD3     | -0.2013 | 0.5726 | 0.4068  | 0.2230 | -1.1985 | 0.0000 | -0.7642 | 0.0019 |
| OLIGO_08735 | BF039167 | NDUFA7    | 0.0647  | 0.8522 | -0.2008 | 0.5338 | 0.2762  | 0.3151 | -0.0380 | 0.8733 |
| OLIGO_10145 | BF039168 | UQCRCQ    | 0.4905  | 0.0495 | -0.5457 | 0.0188 | 0.2622  | 0.1846 | 0.0653  | 0.7024 |
| OLIGO_07093 | BF039172 | SUPT5H    | 0.4163  | 0.5506 | -0.2790 | 0.6687 | -1.0419 | 0.1489 | -0.6110 | 0.2463 |
| OLIGO_04193 | BF039185 | PRKRIR    | -0.2819 | 0.3598 | 0.3867  | 0.2089 | -0.6978 | 0.0504 | -0.6706 | 0.0615 |
| OLIGO_01505 | BF039186 | GPRC5C    | 1.7284  | 0.0000 | -2.1922 | 0.0000 | 0.0512  | 0.8493 | 0.0182  | 0.9370 |
| OLIGO_04189 | BF039189 | SH2BP1    | -0.0021 | 0.9944 | -0.4005 | 0.1479 | -0.3846 | 0.1018 | -0.2441 | 0.2320 |
| OLIGO_04190 | BF039191 | GRP       | -0.1138 | 0.7945 | 0.8009  | 0.0497 | -0.7021 | 0.0423 | -0.9862 | 0.0011 |
| OLIGO_10990 | BF039192 | ANXA6     | 0.8794  | 0.3286 | -1.4473 | 0.0859 | 0.7480  | 0.2890 | 1.0263  | 0.0969 |
| OLIGO_07439 | BF039193 | NEB       | -0.0440 | 0.9445 | 1.0143  | 0.1192 | -0.5851 | 0.3181 | -0.6718 | 0.2402 |
| OLIGO_09532 | BF039195 | LOC614309 | 0.1018  | 0.8864 | -0.1750 | 0.8004 | -0.3884 | 0.5670 | -0.3673 | 0.5733 |
| OLIGO_04201 | BF039197 | TRIM71    | -0.1333 | 0.7568 | -0.2219 | 0.5801 | -0.3903 | 0.2397 | 0.0509  | 0.8622 |
| OLIGO_08999 | BF039199 | FOXK2     | -0.0650 | 0.8478 | -0.2554 | 0.4184 | 0.8257  | 0.0021 | 0.8465  | 0.0003 |
| OLIGO_04462 | BF039204 | LOC530874 | 0.3138  | 0.6304 | -0.8748 | 0.1411 | 0.8706  | 0.0313 | 0.6400  | 0.0703 |
| OLIGO_08766 | BF039213 | NUDT4     | 0.2172  | 0.5270 | -0.4567 | 0.1554 | 0.0934  | 0.7285 | -0.0735 | 0.7550 |
| OLIGO_04620 | BF039216 | DEGS1     | 0.6120  | 0.0933 | -0.5828 | 0.0875 | 0.0183  | 0.9488 | -0.0840 | 0.7365 |
| OLIGO_04625 | BF039218 | C17orf79  | 0.1312  | 0.5779 | 0.0039  | 0.9858 | -0.3228 | 0.0814 | -0.4683 | 0.0040 |
| OLIGO_04623 | BF039220 | LOC345222 | 0.0871  | 0.8718 | -0.0573 | 0.9132 | -0.2964 | 0.3920 | -0.4334 | 0.1515 |

|             |          |           |         |        |         |        |         |        |         |        |
|-------------|----------|-----------|---------|--------|---------|--------|---------|--------|---------|--------|
| OLIGO_04624 | BF039221 | IGFBP4    | -0.4948 | 0.2616 | 0.1282  | 0.7580 | -0.0786 | 0.8164 | -0.1922 | 0.5167 |
| OLIGO_04613 | BF039233 | LRP2      | -0.0340 | 0.9788 | 0.3747  | 0.7637 | -0.2879 | 0.8001 | -0.6309 | 0.5679 |
| OLIGO_09290 | BF039237 | PLP2      | 0.5042  | 0.2153 | -0.2473 | 0.5155 | -0.1317 | 0.6794 | -0.1892 | 0.4976 |
| OLIGO_04617 | BF039240 | EP400     | 0.3665  | 0.2094 | -0.1076 | 0.6849 | 0.3300  | 0.2219 | -0.0491 | 0.8297 |
| OLIGO_04618 | BF039241 | ASGR2     | -0.6042 | 0.3508 | 0.7269  | 0.2582 | 0.3089  | 0.5899 | -0.0947 | 0.8597 |
| OLIGO_04615 | BF039248 | SH2B      | 0.4019  | 0.2799 | -0.3230 | 0.3531 | 0.5195  | 0.0750 | 0.2853  | 0.2635 |
| OLIGO_06729 | BF039250 | PHPT1     | -0.1255 | 0.7690 | -0.0316 | 0.9370 | -0.6583 | 0.0499 | -0.4520 | 0.1237 |
| OLIGO_04619 | BF039256 | MAGI3     | 0.4326  | 0.3368 | -1.1229 | 0.0075 | 0.7760  | 0.0303 | 0.3379  | 0.2745 |
| OLIGO_07322 | BF039258 | FN3KRP    | -0.5694 | 0.0347 | 0.3626  | 0.1485 | 0.3420  | 0.1073 | 0.2512  | 0.1745 |
| OLIGO_04614 | BF039268 | KLHL18    | 0.4927  | 0.0961 | -0.3168 | 0.2509 | 0.3227  | 0.1665 | 0.2796  | 0.1692 |
| OLIGO_04622 | BF039269 | KIAA0274  | 0.6363  | 0.2653 | -0.3536 | 0.5201 | 0.2993  | 0.5764 | 0.2008  | 0.6979 |
| OLIGO_04703 | BF039272 | ZNF710    | 0.5378  | 0.0527 | 0.2662  | 0.3030 | -0.1041 | 0.6332 | -0.0064 | 0.9733 |
| OLIGO_09551 | BF039277 | SLC19A1   | -0.5557 | 0.0828 | 0.6932  | 0.0208 | 0.0040  | 0.9872 | -0.0247 | 0.9112 |
| OLIGO_09904 | BF039286 | AIF1      | -0.8007 | 0.2597 | 0.6158  | 0.3539 | 3.0354  | 0.0000 | 2.7228  | 0.0000 |
| OLIGO_09500 | BF039303 | NDST2     | -0.7687 | 0.0481 | 0.6003  | 0.0986 | 0.9151  | 0.0042 | 0.5417  | 0.0489 |
| OLIGO_05059 | BF039310 | MAML2     | -0.0465 | 0.9006 | 0.1635  | 0.6387 | 0.3295  | 0.2591 | 0.2690  | 0.2927 |
| OLIGO_05060 | BF039311 | TFDP2     | 1.0790  | 0.0103 | -0.8913 | 0.0225 | 0.9886  | 0.0033 | 0.9825  | 0.0007 |
| OLIGO_02600 | BF039312 | TFDP1     | -0.8868 | 0.0980 | 1.7842  | 0.0004 | -0.5845 | 0.1641 | -0.5278 | 0.1514 |
| OLIGO_07201 | BF039322 | ZBTB8OS   | -0.2004 | 0.5667 | -0.1125 | 0.7305 | 0.5043  | 0.0682 | 0.3253  | 0.1830 |
| OLIGO_04209 | BF039324 | TNFRSF1B  | 0.6504  | 0.2256 | -0.9490 | 0.0590 | -0.0377 | 0.9290 | 0.1476  | 0.6891 |
| OLIGO_04211 | BF039325 | DNAJC3    | 1.3827  | 0.0027 | -1.3145 | 0.0023 | 0.5781  | 0.1090 | 0.7202  | 0.0225 |
| OLIGO_04215 | BF039326 | C15orf26  | -0.0256 | 0.9632 | -0.4050 | 0.4676 | 1.3201  | 0.0905 | 0.4720  | 0.3915 |
| OLIGO_04214 | BF039329 | KCNN4     | -0.8922 | 0.1640 | 0.1622  | 0.7882 | 2.3797  | 0.0000 | 1.9293  | 0.0000 |
| OLIGO_11382 | BF039331 | SPARC     | -1.0679 | 0.0286 | 0.4168  | 0.3587 | 0.9586  | 0.0126 | 0.5817  | 0.0822 |
| OLIGO_04202 | BF039345 | USP16     | -0.7014 | 0.1681 | -0.1086 | 0.8188 | 1.1209  | 0.0053 | 1.4948  | 0.0000 |
| OLIGO_04205 | BF039356 | C14orf153 | 0.2870  | 0.4576 | -0.6756 | 0.0620 | -0.0217 | 0.9428 | 0.0894  | 0.7359 |
| OLIGO_11490 | BF039357 | MAN1B1    | -0.2333 | 0.5836 | 0.0524  | 0.8980 | -0.0939 | 0.8123 | 0.2154  | 0.5737 |
| OLIGO_04206 | BF039358 | MYCBP2    | 0.1860  | 0.6227 | -0.1083 | 0.7655 | -0.5031 | 0.1856 | -0.0879 | 0.7897 |
| OLIGO_04217 | BF039361 | PPAN      | 0.5253  | 0.2493 | -0.2011 | 0.6257 | -0.1567 | 0.6824 | -0.1484 | 0.6864 |
| OLIGO_05115 | BF039365 | LOC614166 | 0.9556  | 0.0428 | -1.5600 | 0.0004 | 0.8609  | 0.0237 | 0.3998  | 0.2195 |
| OLIGO_08214 | BF039367 | KHDRBS3   | 1.1040  | 0.0371 | -1.4310 | 0.0039 | -0.5588 | 0.1774 | -0.5860 | 0.1064 |
| OLIGO_07785 | BF039373 | LMCD1     | -1.4573 | 0.0029 | 1.8393  | 0.0001 | 0.4917  | 0.2018 | 0.3991  | 0.2339 |
| OLIGO_07049 | BF039382 | COX8A     | -0.0085 | 0.9777 | -0.6313 | 0.0255 | -0.4013 | 0.0942 | -0.5774 | 0.0058 |
| OLIGO_04204 | BF039383 | TMPO      | -0.0494 | 0.9209 | -0.0922 | 0.8440 | -1.0779 | 0.0061 | -1.0029 | 0.0043 |

|             |          |           |         |        |         |        |         |        |         |        |
|-------------|----------|-----------|---------|--------|---------|--------|---------|--------|---------|--------|
| OLIGO_09001 | BF039384 | ENG       | -0.0746 | 0.8853 | 0.0194  | 0.9680 | 1.1233  | 0.0053 | 0.7390  | 0.0346 |
| OLIGO_08745 | BF039386 | COG2      | -0.0134 | 0.9579 | -0.3739 | 0.1141 | 0.2139  | 0.2874 | 0.1257  | 0.4717 |
| OLIGO_04626 | BF039392 | FBXO25    | 0.0240  | 0.9678 | 0.1946  | 0.7364 | -0.2019 | 0.7145 | -0.4173 | 0.4374 |
| OLIGO_08095 | BF039394 | DGKH      | -0.2642 | 0.5841 | -0.5965 | 0.1894 | 0.4746  | 0.2099 | 0.3406  | 0.3038 |
| OLIGO_04621 | BF039395 | HECTD3    | 0.5007  | 0.1083 | -0.3542 | 0.2212 | 0.6197  | 0.0124 | 0.4412  | 0.0398 |
| OLIGO_09218 | BF039404 | RSAD2     | 0.1743  | 0.7823 | 0.9431  | 0.1104 | -0.5456 | 0.2742 | 0.4604  | 0.3134 |
| OLIGO_04560 | BF039410 | RUSC1     | 0.2777  | 0.2926 | -0.2909 | 0.2386 | -0.0686 | 0.7398 | 0.0302  | 0.8675 |
| OLIGO_10504 | BF039421 | IRS1      | -0.3548 | 0.1514 | 0.4757  | 0.0393 | -0.0232 | 0.9053 | -0.1694 | 0.3186 |
| OLIGO_10864 | BF039426 | PARP14    | 0.0026  | 0.9947 | 0.3897  | 0.2965 | -0.1971 | 0.5324 | -0.3450 | 0.2100 |
| OLIGO_09503 | BF039432 | SCAP2     | 0.3531  | 0.3069 | -0.2610 | 0.4193 | 0.4246  | 0.1172 | 0.4138  | 0.0813 |
| OLIGO_05052 | BF039435 | PRKCG     | -0.0552 | 0.8631 | 0.6635  | 0.0259 | -0.3678 | 0.1497 | -0.1898 | 0.3930 |
| OLIGO_05053 | BF039440 | WDR71     | 0.1133  | 0.7580 | -0.3988 | 0.2466 | -0.1008 | 0.7269 | -0.1732 | 0.4974 |
| OLIGO_05056 | BF039443 | PLEKHH1   | -0.3763 | 0.4568 | 0.6376  | 0.2113 | 0.1477  | 0.7452 | -0.1110 | 0.7968 |
| OLIGO_05057 | BF039448 | Zkscan1   | -0.2718 | 0.3306 | -0.0612 | 0.8137 | 0.0971  | 0.6614 | 0.3967  | 0.0444 |
| OLIGO_09501 | BF039456 | RPS24     | 0.0457  | 0.9449 | 0.1193  | 0.8452 | -0.5089 | 0.3036 | 0.1684  | 0.7162 |
| OLIGO_05046 | BF039460 | TRIP4     | 0.3522  | 0.1117 | -0.5591 | 0.0071 | 0.1301  | 0.4528 | -0.0220 | 0.8846 |
| OLIGO_11607 | BF039462 | GART      | -0.3699 | 0.3541 | -0.7694 | 0.0388 | -0.0546 | 0.8630 | 0.0023  | 0.9936 |
| OLIGO_08723 | BF039466 | UNG2      | 0.6417  | 0.1825 | -0.0659 | 0.8865 | -0.0929 | 0.8049 | -0.0357 | 0.9136 |
| OLIGO_05049 | BF039468 | RASL11A   | -1.3297 | 0.1165 | -0.7234 | 0.3796 | 1.3107  | 0.0970 | 1.2097  | 0.1145 |
| OLIGO_05050 | BF039470 | MCCC1     | -0.2593 | 0.4740 | -0.3503 | 0.3041 | 0.3368  | 0.2353 | 0.2264  | 0.3619 |
| OLIGO_05047 | BF039474 | ACVR2B    | 0.9112  | 0.0714 | -0.9783 | 0.0381 | 0.6227  | 0.1178 | 0.4104  | 0.2367 |
| OLIGO_05058 | BF039477 | PRO1580   | -0.3255 | 0.2624 | 0.4532  | 0.0955 | 0.6276  | 0.0060 | 0.2791  | 0.1615 |
| OLIGO_05061 | BF039480 | LOC91431  | -0.2698 | 0.5019 | -0.8678 | 0.0213 | -0.1511 | 0.6312 | -0.0884 | 0.7485 |
| OLIGO_05062 | BF039483 | DSCAML1   | 0.0251  | 0.9694 | 0.5653  | 0.3828 | 0.6147  | 0.3255 | -0.1006 | 0.8621 |
| OLIGO_05054 | BF039493 | NY-SAR-48 | -0.0558 | 0.8475 | -0.3729 | 0.1681 | -0.0605 | 0.7954 | -0.1158 | 0.5629 |
| OLIGO_04140 | BF039496 | CNOT3     | 0.2610  | 0.3495 | -0.1802 | 0.4890 | 0.2577  | 0.2442 | 0.0173  | 0.9283 |
| OLIGO_04139 | BF039501 | LOC653890 | 0.2033  | 0.6475 | -0.4596 | 0.2694 | 0.3226  | 0.3557 | 0.0196  | 0.9492 |
| OLIGO_08945 | BF039503 | CCRK      | 0.2986  | 0.5157 | 0.2184  | 0.6196 | 0.1343  | 0.7403 | -0.0574 | 0.8804 |
| OLIGO_04130 | BF039515 | ANKRD28   | 0.4682  | 0.0833 | -0.1546 | 0.5388 | -0.1475 | 0.4882 | 0.1062  | 0.5668 |
| OLIGO_03019 | BF039518 | VAPB      | 0.0445  | 0.8972 | 0.2688  | 0.4045 | -0.8301 | 0.0022 | -0.4689 | 0.0479 |
| OLIGO_08008 | BF039520 | ZA20D2    | 0.1258  | 0.7410 | -0.4633 | 0.1932 | -1.1628 | 0.0001 | -0.4143 | 0.1137 |
| OLIGO_05091 | BF039521 | ACTN1     | 0.8077  | 0.0374 | -0.6010 | 0.0974 | 0.5742  | 0.0589 | 0.5120  | 0.0543 |
| OLIGO_08940 | BF039523 | MGC137245 | 0.3088  | 0.4653 | -0.0163 | 0.9669 | -0.0493 | 0.8937 | -0.0859 | 0.8066 |
| OLIGO_08202 | BF039526 | SCNM1     | 0.0783  | 0.8805 | -0.5336 | 0.2739 | -0.6390 | 0.1182 | -0.3303 | 0.3557 |

|             |          |           |         |        |         |        |         |        |         |        |
|-------------|----------|-----------|---------|--------|---------|--------|---------|--------|---------|--------|
| OLIGO_04131 | BF039528 | LEMD3     | 0.7531  | 0.0151 | 0.0802  | 0.7813 | -0.6483 | 0.0076 | -0.3824 | 0.0716 |
| OLIGO_04132 | BF039529 | PCBP2     | 0.2643  | 0.3578 | 0.2186  | 0.4022 | -0.3374 | 0.1195 | -0.1131 | 0.5507 |
| OLIGO_04133 | BF039530 | CCDC22    | -0.4565 | 0.1825 | 0.7989  | 0.0128 | -0.4494 | 0.0952 | -0.3320 | 0.1581 |
| OLIGO_04134 | BF039531 | ZNF639    | -0.2316 | 0.5170 | 0.2272  | 0.5098 | -0.0762 | 0.8111 | -0.1661 | 0.5923 |
| OLIGO_04142 | BF039534 | MFSD3     | 0.1877  | 0.5395 | 1.0065  | 0.0005 | -0.4818 | 0.0466 | -0.3785 | 0.0724 |
| OLIGO_04141 | BF039535 | SLC30A1   | 0.4558  | 0.2697 | 0.0758  | 0.8443 | 0.5663  | 0.0807 | 0.9271  | 0.0011 |
| OLIGO_11476 | BF039538 | ABCA5     | -0.1454 | 0.5853 | 0.3276  | 0.1892 | 0.0645  | 0.7575 | 0.0824  | 0.6522 |
| OLIGO_06925 | BF039548 | NUP205    | -0.2952 | 0.3320 | -0.0700 | 0.8056 | -0.4510 | 0.0589 | -0.4714 | 0.0243 |
| OLIGO_04136 | BF039550 | CHRDL1    | 0.2975  | 0.6554 | 0.4319  | 0.4852 | 0.8393  | 0.1116 | -0.2351 | 0.6111 |
| OLIGO_08939 | BF039553 | APOA1BP   | 0.0677  | 0.7901 | -0.1109 | 0.6420 | -0.2172 | 0.2803 | -0.2781 | 0.1124 |
| OLIGO_08705 | BF039557 | CYP3A4    | -0.3907 | 0.5041 | 0.3891  | 0.4923 | 0.8695  | 0.1416 | 0.6310  | 0.2501 |
| OLIGO_08899 | BF039559 | CD300A    | -0.0876 | 0.9180 | 0.0197  | 0.9811 | 0.5085  | 0.5329 | 0.2404  | 0.7606 |
| OLIGO_10924 | BF039568 | GOLGA4    | 0.9988  | 0.0046 | -1.6012 | 0.0000 | 0.7794  | 0.0053 | 0.6479  | 0.0073 |
| OLIGO_01400 | BF039578 | COPZ1     | -0.5656 | 0.0152 | 0.2989  | 0.1680 | -0.5958 | 0.0012 | -0.6303 | 0.0001 |
| OLIGO_07027 | BF039581 | LOC644799 | 0.0338  | 0.9094 | 0.0553  | 0.8424 | -0.7860 | 0.0008 | -0.7225 | 0.0004 |
| OLIGO_04557 | BF039583 | IFT88     | -0.3392 | 0.4086 | 0.5780  | 0.1347 | -0.0660 | 0.8375 | 0.1252  | 0.6591 |
| OLIGO_04480 | BF039590 | KIAA1542  | 0.3050  | 0.4911 | -0.4300 | 0.2939 | -0.0376 | 0.9085 | 0.1476  | 0.6060 |
| OLIGO_04482 | BF039592 | Traf3     | 0.3948  | 0.1850 | -0.3311 | 0.2343 | 0.5493  | 0.0191 | 0.4006  | 0.0504 |
| OLIGO_05124 | BF039593 | LOC509536 | 0.1209  | 0.6784 | 0.7571  | 0.0055 | -0.3747 | 0.1056 | -0.4306 | 0.0321 |
| OLIGO_04983 | BF039601 | PEX5      | -0.5231 | 0.3185 | 0.6771  | 0.2482 | 0.1937  | 0.6478 | 0.3168  | 0.4511 |
| OLIGO_11097 | BF039606 | MAD2L1    | 0.3766  | 0.5217 | -1.5247 | 0.0058 | 0.6552  | 0.1554 | 0.5263  | 0.1923 |
| OLIGO_11419 | BF039614 | MYO1D     | -0.0268 | 0.9198 | 0.0398  | 0.8723 | -0.2872 | 0.1743 | -0.0796 | 0.6673 |
| OLIGO_00196 | BF039617 | BLOC1S2   | 0.7717  | 0.0879 | -0.6426 | 0.1285 | -0.2242 | 0.5264 | -0.5745 | 0.0641 |
| OLIGO_04985 | BF039623 | LOC653532 | -0.2275 | 0.5847 | -0.2812 | 0.4833 | 0.1430  | 0.6460 | -0.2774 | 0.3092 |
| OLIGO_09463 | BF039630 | MGC137693 | 0.3943  | 0.1181 | -0.3537 | 0.1328 | 0.1601  | 0.4201 | -0.0821 | 0.6352 |
| OLIGO_04986 | BF039637 | MAP2K6    | -0.3284 | 0.5036 | 1.1284  | 0.0174 | -0.4763 | 0.2188 | -0.5724 | 0.0888 |
| OLIGO_04987 | BF039639 | SCARB1    | 0.5306  | 0.4688 | -0.2439 | 0.7214 | 1.0451  | 0.0663 | 0.6828  | 0.1701 |
| OLIGO_04988 | BF039643 | TEAD1     | 0.1364  | 0.7479 | -0.1089 | 0.7837 | 0.5601  | 0.0926 | 0.2926  | 0.3151 |
| OLIGO_09028 | BF039645 | ZDHHC23   | 0.9068  | 0.0030 | -0.8820 | 0.0020 | 0.6832  | 0.0045 | 0.5221  | 0.0127 |
| OLIGO_11468 | BF039648 | BBX       | -0.0541 | 0.8835 | 0.5926  | 0.0867 | 0.3396  | 0.2413 | 0.5836  | 0.0217 |
| OLIGO_09466 | BF039653 | GTF2A2    | 0.0711  | 0.8652 | -1.3017 | 0.0858 | -0.3645 | 0.4406 | 0.0435  | 0.8999 |
| OLIGO_04981 | BF039660 | DVL3      | -0.1031 | 0.7781 | -0.0338 | 0.9214 | 0.0297  | 0.9176 | 0.1580  | 0.5310 |
| OLIGO_04980 | BF039661 | SRM       | -0.2113 | 0.8171 | -0.2825 | 0.7529 | 0.5209  | 0.5488 | 0.6827  | 0.4208 |
| OLIGO_03462 | BF039666 | CDC42EP2  | -0.2347 | 0.7926 | -0.0470 | 0.9571 | 0.0760  | 0.9301 | 0.1389  | 0.8696 |

|             |          |           |         |        |         |        |         |        |         |        |
|-------------|----------|-----------|---------|--------|---------|--------|---------|--------|---------|--------|
| OLIGO_09183 | BF039667 | GCM1      | -0.2232 | 0.8622 | -0.8539 | 0.5031 | 3.3677  | 0.0128 | 2.4849  | 0.0462 |
| OLIGO_07173 | BF039677 | PSMD7     | 0.1859  | 0.5167 | -0.1953 | 0.4642 | 0.2789  | 0.2186 | -0.0948 | 0.6301 |
| OLIGO_04162 | BF039681 | PTK2      | 0.0269  | 0.9555 | -0.2918 | 0.5175 | 0.6639  | 0.0794 | 0.3380  | 0.3069 |
| OLIGO_10600 | BF039685 | HSPE1     | -1.0047 | 0.2129 | 0.3133  | 0.6782 | 1.0036  | 0.1052 | 0.3140  | 0.5609 |
| OLIGO_06494 | BF039686 | WIPI2     | 0.0889  | 0.7968 | -0.1413 | 0.6614 | 1.1543  | 0.0000 | 0.7829  | 0.0010 |
| OLIGO_06495 | BF039689 | DNAJB11   | 0.3859  | 0.2342 | -0.6210 | 0.0402 | 0.5489  | 0.0327 | 0.4535  | 0.0424 |
| OLIGO_11306 | BF039691 | MCFD2     | 0.5641  | 0.1280 | -0.9028 | 0.0090 | 0.8374  | 0.0045 | 1.1551  | 0.0000 |
| OLIGO_04091 | BF039697 | IFNAR2    | 0.3980  | 0.3885 | 0.2729  | 0.5271 | -0.0350 | 0.9230 | 0.1256  | 0.6916 |
| OLIGO_06692 | BF039702 | NME2      | 0.2021  | 0.5228 | -0.3385 | 0.2471 | -0.7376 | 0.0036 | -0.8000 | 0.0003 |
| OLIGO_04086 | BF039704 | CYB561D2  | -0.0800 | 0.9295 | -0.2531 | 0.7744 | -0.4143 | 0.6334 | -0.2472 | 0.7686 |
| OLIGO_11269 | BF039705 | LOC506009 | 0.3038  | 0.3565 | -0.3419 | 0.2673 | -0.0062 | 0.9808 | -0.0810 | 0.7200 |
| OLIGO_04084 | BF039711 | RMND5A    | 0.1310  | 0.7550 | -0.4040 | 0.3585 | -0.5354 | 0.2972 | 0.0592  | 0.8611 |
| OLIGO_06497 | BF039715 | LHX6      | 0.0722  | 0.8623 | -0.1205 | 0.7575 | -0.6536 | 0.0471 | -0.1791 | 0.5311 |
| OLIGO_08909 | BF039717 | C10orf58  | 0.2685  | 0.6279 | -0.7612 | 0.1417 | 2.0110  | 0.0000 | 0.8400  | 0.0310 |
| OLIGO_04492 | BF039718 | ALKBH1    | 0.0789  | 0.8336 | -0.3212 | 0.3606 | 0.4648  | 0.1156 | 0.2766  | 0.2905 |
| OLIGO_04493 | BF039721 | ABHD5     | 0.0194  | 0.9631 | -0.3174 | 0.4256 | 0.4277  | 0.1602 | 0.4915  | 0.0622 |
| OLIGO_04487 | BF039724 | DAK       | -0.8461 | 0.0221 | 0.5334  | 0.1223 | 0.0615  | 0.8313 | 0.3186  | 0.2080 |
| OLIGO_04485 | BF039730 | SRP54     | 0.2953  | 0.5268 | -0.4626 | 0.2894 | 0.8337  | 0.0230 | 0.5264  | 0.1006 |
| OLIGO_04486 | BF039735 | LOC514189 | 1.5348  | 0.1658 | -1.5472 | 0.1577 | 1.3964  | 0.1824 | 1.1509  | 0.2541 |
| OLIGO_04491 | BF039737 | SIRT6     | 0.0742  | 0.7612 | 0.2488  | 0.2743 | -0.2215 | 0.2518 | -0.1827 | 0.2823 |
| OLIGO_11534 | BF039744 | PPM1A     | -0.3961 | 0.5373 | 0.4358  | 0.4680 | 0.2226  | 0.6685 | -0.0524 | 0.9087 |
| OLIGO_04490 | BF039750 | CTCF      | 0.3598  | 0.2415 | -0.8289 | 0.0041 | -0.2774 | 0.2496 | -0.1373 | 0.5148 |
| OLIGO_09200 | BF039753 | NBL1      | -1.2567 | 0.0001 | 1.6325  | 0.0000 | 0.2843  | 0.2691 | 0.1559  | 0.4779 |
| OLIGO_06511 | BF039771 | NDUFAB1   | 0.4377  | 0.0830 | -1.0668 | 0.0000 | -0.6948 | 0.0006 | -0.2817 | 0.1058 |
| OLIGO_09147 | BF039783 | SHMT2     | -0.4465 | 0.2294 | 0.9657  | 0.0056 | -0.3488 | 0.2313 | -0.1453 | 0.5686 |
| OLIGO_07068 | BF039787 | KIAA0082  | 0.1637  | 0.5709 | 0.1827  | 0.4986 | 0.4981  | 0.0286 | 0.4504  | 0.0267 |
| OLIGO_04087 | BF039790 | BRWD1     | 0.0137  | 0.9740 | -0.4498 | 0.2519 | 0.7402  | 0.0248 | 0.6330  | 0.0283 |
| OLIGO_04089 | BF039791 | PVRL4     | -0.4189 | 0.6663 | 0.4384  | 0.6445 | -0.3770 | 0.6857 | 0.1935  | 0.8305 |
| OLIGO_04088 | BF039792 | RAD52     | 0.0569  | 0.8321 | -0.4159 | 0.0940 | -0.1478 | 0.4889 | -0.0886 | 0.6284 |
| OLIGO_06514 | BF039797 | LIPE      | 0.3502  | 0.3905 | -0.3860 | 0.3203 | -0.0176 | 0.9536 | 0.2259  | 0.3975 |
| OLIGO_06484 | BF039800 | SRC       | 0.0437  | 0.9273 | 0.1375  | 0.7586 | -0.0484 | 0.8973 | 0.0318  | 0.9228 |
| OLIGO_06483 | BF039801 | EXOSC3    | 0.6706  | 0.1397 | -0.8800 | 0.0385 | 0.6074  | 0.0919 | 0.0986  | 0.7574 |
| OLIGO_11537 | BF039805 | BCR       | 0.7281  | 0.0173 | -0.0709 | 0.8035 | -0.4442 | 0.0635 | -0.4059 | 0.0527 |
| OLIGO_11351 | BF039814 | HNRPAB    | 0.5231  | 0.3500 | 0.0428  | 0.9343 | -0.7563 | 0.0826 | -0.6327 | 0.0972 |

|             |          |               |         |        |         |        |         |        |         |        |
|-------------|----------|---------------|---------|--------|---------|--------|---------|--------|---------|--------|
| OLIGO_04502 | BF039820 | PPM1M         | 0.1580  | 0.7696 | -0.1334 | 0.7961 | -0.2754 | 0.5768 | -0.0677 | 0.8850 |
| OLIGO_04499 | BF039822 | TREX1         | 0.3375  | 0.4552 | -0.2247 | 0.6010 | 0.7331  | 0.1112 | 0.6252  | 0.1534 |
| OLIGO_04501 | BF039826 | PTPN21        | 0.0767  | 0.8644 | -0.3531 | 0.4597 | -0.6160 | 0.3049 | -0.2961 | 0.4793 |
| OLIGO_11633 | BF039828 | LOC511619     | 0.2576  | 0.4891 | -0.6878 | 0.0478 | 0.5172  | 0.0801 | 0.3619  | 0.1645 |
| OLIGO_04489 | BF039834 | PCM1          | 0.1969  | 0.7330 | -1.1573 | 0.0545 | -0.3339 | 0.5402 | 0.1531  | 0.7694 |
| OLIGO_04994 | BF039838 | KIAA0232      | 1.0582  | 0.1625 | -0.2954 | 0.6619 | -0.1154 | 0.8283 | -0.0168 | 0.9713 |
| OLIGO_04995 | BF039840 | Rps6kc1       | -0.3078 | 0.4969 | 0.6019  | 0.1545 | -0.0064 | 0.9859 | -0.0910 | 0.7733 |
| OLIGO_04488 | BF039843 | ISGF3G        | 0.1439  | 0.8139 | -0.5601 | 0.3001 | -0.0756 | 0.8572 | 0.2934  | 0.4251 |
| OLIGO_09212 | BF039847 | HBP1          | 0.1259  | 0.7881 | -0.4793 | 0.2744 | 1.0086  | 0.0062 | 0.8737  | 0.0068 |
| OLIGO_07114 | BF039861 | DONSON        | -0.8564 | 0.0029 | 0.6965  | 0.0094 | -0.5339 | 0.0178 | -0.7173 | 0.0003 |
| OLIGO_07174 | BF039863 | CDCA8         | 0.8317  | 0.1147 | -1.7999 | 0.0334 | -0.0382 | 0.9132 | 0.0669  | 0.8304 |
| OLIGO_06633 | BF039865 | TALDO1        | 0.9338  | 0.0382 | -0.9188 | 0.0412 | -0.2232 | 0.5021 | -0.0324 | 0.9152 |
| OLIGO_04990 | BF039867 | BRD9          | -0.1331 | 0.7909 | 0.8947  | 0.0639 | 0.1259  | 0.7481 | 0.1008  | 0.7711 |
| OLIGO_11579 | BF039869 | MCOLN1        | -0.0012 | 0.9988 | 0.0568  | 0.9428 | -0.5962 | 0.3690 | -0.2278 | 0.6949 |
| OLIGO_04991 | BF039871 | 2310008H09Rik | 0.1607  | 0.6431 | 0.1574  | 0.6364 | -0.0375 | 0.9002 | 0.2637  | 0.4423 |
| OLIGO_00357 | BF039874 | PTGFRN        | -0.0902 | 0.8039 | -0.3748 | 0.2672 | 0.9123  | 0.0017 | 0.9080  | 0.0003 |
| OLIGO_09470 | BF039875 | IMP4          | 0.8568  | 0.0561 | -1.0158 | 0.0449 | 0.5004  | 0.2152 | 0.3709  | 0.3291 |
| OLIGO_08810 | BF039876 | FLNA          | -0.3835 | 0.5046 | 0.3447  | 0.5213 | -0.6510 | 0.1488 | -0.5573 | 0.1580 |
| OLIGO_04996 | BF039883 | THEM4         | 0.5321  | 0.1511 | -0.7429 | 0.0309 | 0.3491  | 0.2357 | 0.5809  | 0.0225 |
| OLIGO_11634 | BF039890 | VDAC1         | -0.2980 | 0.4506 | 0.4113  | 0.2657 | -1.0929 | 0.0005 | -0.9181 | 0.0008 |
| OLIGO_01750 | BF039895 | Fbxw17        | 0.1333  | 0.7673 | -0.0529 | 0.9001 | -1.0138 | 0.0043 | -0.7903 | 0.0109 |
| OLIGO_04989 | BF039900 | REEP5         | 0.9764  | 0.0100 | -1.1185 | 0.0016 | 0.5955  | 0.0446 | 0.3791  | 0.1437 |
| OLIGO_10065 | BF039906 | MGC12966      | -1.0310 | 0.0818 | 1.9577  | 0.0004 | 0.0071  | 0.9879 | 0.3543  | 0.4021 |
| OLIGO_04505 | BF039909 | C10orf56      | -0.1698 | 0.6968 | 0.3974  | 0.3618 | -0.4048 | 0.3383 | -0.3862 | 0.3452 |
| OLIGO_08277 | BF039915 | HDAC5         | -1.2428 | 0.0008 | 1.1491  | 0.0010 | -0.3231 | 0.2656 | -0.1970 | 0.4380 |
| OLIGO_09116 | BF039921 | COX7A2        | 0.5488  | 0.2290 | -0.8803 | 0.0394 | -0.4208 | 0.2392 | -0.7113 | 0.0233 |
| OLIGO_08054 | BF039924 | ING4          | 0.7029  | 0.1036 | -0.5145 | 0.2044 | -0.4031 | 0.2958 | -0.1446 | 0.6820 |
| OLIGO_04495 | BF039936 | LOC653206     | 0.0013  | 0.9977 | -0.1441 | 0.7314 | 0.7208  | 0.0426 | 0.7619  | 0.0139 |
| OLIGO_04497 | BF039945 | DHTKD1        | 1.3245  | 0.0410 | -1.3963 | 0.0308 | -0.5175 | 0.3483 | -0.4811 | 0.3632 |
| OLIGO_04498 | BF039946 | C14orf150     | 1.0400  | 0.0076 | -0.9042 | 0.0131 | 0.2064  | 0.4980 | -0.0420 | 0.8754 |
| OLIGO_09214 | BF039948 | IK            | 0.2689  | 0.5619 | -0.6076 | 0.1609 | 0.9852  | 0.0083 | 0.2801  | 0.3813 |
| OLIGO_07140 | BF039949 | ATPIF1        | 0.1699  | 0.6081 | -0.4353 | 0.1588 | -0.1940 | 0.4589 | -0.4267 | 0.0616 |
| OLIGO_04503 | BF039950 | E2F6          | 0.7496  | 0.1433 | -1.1963 | 0.0406 | 0.1497  | 0.7123 | 0.2044  | 0.6066 |
| OLIGO_04992 | BF039961 | C14orf169     | 0.5314  | 0.0794 | -0.1252 | 0.6579 | -0.3920 | 0.0989 | -0.1901 | 0.3602 |

|             |          |           |         |        |         |        |         |        |         |        |
|-------------|----------|-----------|---------|--------|---------|--------|---------|--------|---------|--------|
| OLIGO_09398 | BF039964 | FLJ10404  | 0.3797  | 0.3011 | 0.1595  | 0.6421 | -0.1310 | 0.6488 | 0.0565  | 0.8226 |
| OLIGO_09474 | BF039965 | RENBP     | 1.0273  | 0.0281 | -0.7133 | 0.1027 | 0.2147  | 0.5572 | -0.0835 | 0.7942 |
| OLIGO_09387 | BF039977 | TRAM1     | 0.3780  | 0.2252 | -0.5461 | 0.0613 | -0.2807 | 0.2504 | -0.1196 | 0.5757 |
| OLIGO_04924 | BF039978 | C7orf23   | 0.8004  | 0.0817 | -1.1287 | 0.0088 | 0.1388  | 0.6995 | 0.0356  | 0.9101 |
| OLIGO_04926 | BF039979 | HIST1H3D  | -0.1910 | 0.6594 | 0.6765  | 0.0948 | -0.4596 | 0.1667 | -0.9315 | 0.0014 |
| OLIGO_04927 | BF039994 | HKDC1     | -0.0740 | 0.7976 | 0.0207  | 0.9390 | 0.4365  | 0.0541 | 0.0743  | 0.7076 |
| OLIGO_09083 | BF039997 | PCSK7     | 0.3316  | 0.5156 | 0.0143  | 0.9771 | 0.9744  | 0.0119 | 1.0631  | 0.0018 |
| OLIGO_07280 | BF040000 | APEX1     | 0.2501  | 0.5069 | -0.2570 | 0.4659 | -1.4297 | 0.0000 | -1.3604 | 0.0000 |
| OLIGO_08788 | BF040001 | SLC35E1   | 0.2300  | 0.4093 | -0.0931 | 0.7210 | 0.1746  | 0.4243 | 0.0388  | 0.8397 |
| OLIGO_04923 | BF040002 | CSF1R     | 0.3898  | 0.6698 | -0.1458 | 0.8696 | 0.9680  | 0.2696 | 0.6685  | 0.4251 |
| OLIGO_06592 | BF040003 | IARS2     | 0.2075  | 0.3601 | -0.1681 | 0.4242 | 0.1877  | 0.2975 | -0.1010 | 0.5212 |
| OLIGO_06393 | BF040008 | QRSL1     | 0.2623  | 0.3636 | -0.4401 | 0.1515 | -0.3918 | 0.2130 | -0.3632 | 0.2767 |
| OLIGO_06394 | BF040011 | TRIB3     | 0.0705  | 0.8592 | -0.3797 | 0.3078 | -0.5094 | 0.0927 | -0.1822 | 0.4915 |
| OLIGO_04065 | BF040014 | RAB18     | 0.5364  | 0.1069 | -0.7885 | 0.0114 | 0.3806  | 0.1459 | 0.4388  | 0.0551 |
| OLIGO_06388 | BF040016 | GGPS1     | 0.5556  | 0.2160 | -0.4931 | 0.2501 | 0.2161  | 0.5571 | 0.1218  | 0.7179 |
| OLIGO_04066 | BF040020 | LOC653397 | 0.0929  | 0.8288 | -0.4753 | 0.2370 | 0.1528  | 0.6500 | -0.0459 | 0.8766 |
| OLIGO_07973 | BF040027 | EBNA1BP2  | 0.3816  | 0.2301 | -0.7618 | 0.0102 | -0.5162 | 0.0413 | -0.1074 | 0.6256 |
| OLIGO_10889 | BF040029 | LOC389541 | -0.1811 | 0.6087 | 0.5894  | 0.0753 | 0.1206  | 0.6635 | 0.2694  | 0.2672 |
| OLIGO_08175 | BF040043 | LOC532359 | -0.8178 | 0.0319 | 0.9713  | 0.0065 | -0.4618 | 0.1250 | -0.3230 | 0.2170 |
| OLIGO_06380 | BF040045 | TMEM16J   | 0.8853  | 0.0489 | -0.6220 | 0.1294 | 0.8874  | 0.0089 | 0.5442  | 0.0664 |
| OLIGO_06409 | BF040051 | JTV1      | -0.0992 | 0.8369 | -0.3874 | 0.3788 | 0.4803  | 0.1967 | -0.4246 | 0.2030 |
| OLIGO_11452 | BF040052 | TIPARP    | 0.3709  | 0.3142 | -0.5149 | 0.1343 | 0.5131  | 0.0804 | 0.7999  | 0.0016 |
| OLIGO_11076 | BF040053 | KIF21B    | -0.6550 | 0.5248 | 0.7160  | 0.4428 | 0.1142  | 0.8909 | 0.7017  | 0.3424 |
| OLIGO_04068 | BF040056 | SLC37A3   | 0.5924  | 0.3232 | -0.1048 | 0.8473 | 1.2095  | 0.0027 | 1.2473  | 0.0004 |
| OLIGO_06395 | BF040059 | ITGB1BP1  | 0.2186  | 0.4456 | -0.4486 | 0.0928 | -0.0965 | 0.6711 | 0.2182  | 0.2682 |
| OLIGO_04064 | BF040063 | PHLPPL    | 0.5856  | 0.1531 | -0.0016 | 0.9967 | 1.3432  | 0.0000 | 1.3771  | 0.0000 |
| OLIGO_06401 | BF040065 | CD109     | 0.0611  | 0.8894 | -0.5527 | 0.2281 | -1.1966 | 0.0434 | -0.9082 | 0.0934 |
| OLIGO_06414 | BF040066 | NFATC3    | 0.2249  | 0.6454 | -0.3439 | 0.4574 | -0.0147 | 0.9694 | 0.0655  | 0.8450 |
| OLIGO_08730 | BF040069 | EFNA1     | -0.1241 | 0.7650 | 0.4719  | 0.2301 | 0.4140  | 0.2071 | 0.2751  | 0.3350 |
| OLIGO_09155 | BF040070 | SYVN1     | 0.7748  | 0.0082 | -0.3960 | 0.1470 | -0.9098 | 0.0001 | -0.7094 | 0.0004 |
| OLIGO_04430 | BF040076 | RIPK3     | 0.0507  | 0.9109 | 0.8569  | 0.0436 | 0.5460  | 0.1284 | 0.5555  | 0.0747 |
| OLIGO_04436 | BF040079 | LOC650188 | 0.1197  | 0.6462 | -0.2412 | 0.3221 | 0.3351  | 0.1026 | 0.0876  | 0.6245 |
| OLIGO_09159 | BF040081 | C11orf59  | 0.5112  | 0.3292 | -0.7862 | 0.1089 | -0.2954 | 0.4718 | -0.0705 | 0.8444 |
| OLIGO_09017 | BF040085 | KSR1      | 1.2291  | 0.0004 | -1.2033 | 0.0002 | 0.6181  | 0.0236 | 0.6660  | 0.0051 |

|             |          |               |         |        |         |        |         |        |         |        |
|-------------|----------|---------------|---------|--------|---------|--------|---------|--------|---------|--------|
| OLIGO_09223 | BF040091 | RBM16         | -0.2596 | 0.3491 | -0.0596 | 0.8177 | 0.1361  | 0.5328 | -0.1228 | 0.5191 |
| OLIGO_04425 | BF040094 | PES1          | -0.7401 | 0.0990 | 0.6291  | 0.1356 | 0.1008  | 0.7743 | -0.2712 | 0.3778 |
| OLIGO_08758 | BF040104 | 4932441K18Rik | 0.3964  | 0.3464 | -0.6218 | 0.1146 | 0.4507  | 0.1721 | 0.2864  | 0.3215 |
| OLIGO_04426 | BF040107 | DPP3          | -0.1350 | 0.6012 | -0.1206 | 0.6148 | 0.3480  | 0.0902 | -0.1659 | 0.3495 |
| OLIGO_11519 | BF040109 | TAF6L         | 0.6789  | 0.2426 | -1.1413 | 0.0383 | -0.4392 | 0.3340 | -0.1958 | 0.6227 |
| OLIGO_04438 | BF040115 | RPUSD2        | 0.2578  | 0.4364 | -0.6795 | 0.0285 | 0.0784  | 0.7636 | -0.1936 | 0.3948 |
| OLIGO_04428 | BF040119 | LATS2         | 0.5824  | 0.0903 | -0.2293 | 0.4750 | -0.4855 | 0.0716 | 0.1338  | 0.5701 |
| OLIGO_09157 | BF040122 | PNPLA2        | 0.2644  | 0.5421 | -0.4789 | 0.2766 | 1.3339  | 0.0458 | 1.1969  | 0.0819 |
| OLIGO_09158 | BF040123 | BCAS2         | 0.4714  | 0.3411 | -0.7630 | 0.0998 | 0.6651  | 0.0960 | 0.4070  | 0.2356 |
| OLIGO_04434 | BF040124 | CXorf17       | 0.1455  | 0.6480 | -0.3329 | 0.2642 | -0.3406 | 0.1736 | -0.4172 | 0.0596 |
| OLIGO_04433 | BF040125 | DLK1          | 0.2969  | 0.7012 | -0.3541 | 0.6422 | 1.0569  | 0.1832 | 0.7177  | 0.3282 |
| OLIGO_04929 | BF040134 | EDG1          | 0.1517  | 0.8067 | -0.1844 | 0.7505 | 0.1794  | 0.7121 | 0.0445  | 0.9166 |
| OLIGO_09105 | BF040142 | ITGB4         | -0.7846 | 0.2097 | 0.5251  | 0.3832 | 0.6618  | 0.1630 | 0.2485  | 0.5493 |
| OLIGO_11324 | BF040147 | GALK1         | -0.4042 | 0.1797 | -0.0377 | 0.8936 | -0.3720 | 0.1153 | -0.0844 | 0.6828 |
| OLIGO_09910 | BF040148 | NPLOC4        | -0.1107 | 0.7787 | 0.5314  | 0.1495 | 0.2128  | 0.4904 | 0.2576  | 0.3406 |
| OLIGO_03928 | BF040152 | USP9X         | 0.2702  | 0.6240 | -0.8520 | 0.0988 | 0.7200  | 0.0962 | 1.1236  | 0.0032 |
| OLIGO_08879 | BF040171 | ABHD2         | 1.7307  | 0.0024 | -1.6319 | 0.0023 | 1.2588  | 0.0059 | 1.1104  | 0.0047 |
| OLIGO_04071 | BF040173 | Ankrd13b      | -0.4179 | 0.6376 | -0.1430 | 0.8629 | -0.6513 | 0.3464 | -0.4969 | 0.4209 |
| OLIGO_10574 | BF040174 | ORC6L         | 0.2279  | 0.6415 | 0.1691  | 0.7134 | -0.2100 | 0.5839 | 0.0927  | 0.7824 |
| OLIGO_06442 | BF040175 | TOM1          | 0.0557  | 0.8592 | -0.2026 | 0.4904 | 0.3712  | 0.1324 | 0.1621  | 0.4524 |
| OLIGO_10857 | BF040177 | BAG1          | -0.1945 | 0.6013 | 0.0135  | 0.9691 | 0.0155  | 0.9607 | 0.0758  | 0.8011 |
| OLIGO_06792 | BF040179 | KPNA2         | 0.4569  | 0.2070 | -0.5103 | 0.1320 | -0.7538 | 0.0081 | -0.6222 | 0.0125 |
| OLIGO_05090 | BF040183 | CTAGE5        | 0.4399  | 0.4217 | -0.4014 | 0.4493 | 0.7395  | 0.1695 | 0.4905  | 0.3295 |
| OLIGO_06469 | BF040187 | TFE3          | 0.7311  | 0.0076 | -0.9625 | 0.0002 | 0.0476  | 0.8250 | 0.1904  | 0.3100 |
| OLIGO_06468 | BF040192 | ZMAT1         | 0.3553  | 0.5870 | -0.3911 | 0.5160 | -0.1519 | 0.7572 | -0.2324 | 0.5892 |
| OLIGO_06459 | BF040198 | ARHGEF16      | -0.6848 | 0.4787 | 0.6307  | 0.5457 | 1.0704  | 0.2061 | 0.5566  | 0.4914 |
| OLIGO_11435 | BF040208 | PLEKHA4       | -0.2043 | 0.7992 | 0.0574  | 0.9413 | -0.6865 | 0.3759 | -0.2628 | 0.7200 |
| OLIGO_06422 | BF040210 | DAB2          | 0.9909  | 0.1030 | -1.6363 | 0.0040 | 2.1673  | 0.0000 | 1.8598  | 0.0000 |
| OLIGO_02716 | BF040215 | TMEM62        | 0.6536  | 0.2683 | -1.4856 | 0.0073 | 1.2501  | 0.0071 | 1.0371  | 0.0107 |
| OLIGO_06419 | BF040218 | DDX17         | -0.2891 | 0.4925 | 0.2713  | 0.4868 | -0.0495 | 0.8787 | -0.0104 | 0.9707 |
| OLIGO_04070 | BF040219 | CSG1cA-T      | 0.1673  | 0.7318 | -0.1686 | 0.7189 | -0.2687 | 0.5507 | -0.1115 | 0.7923 |
| OLIGO_06448 | BF040223 | POLR3F        | -0.0625 | 0.9074 | -0.5630 | 0.2628 | -0.2546 | 0.5462 | -0.3969 | 0.2873 |
| OLIGO_06446 | BF040225 | SLC37A1       | -0.0549 | 0.8829 | 0.2676  | 0.4429 | 0.1525  | 0.6023 | -0.0939 | 0.7167 |
| OLIGO_06436 | BF040226 | ERGIC3        | -1.2599 | 0.0002 | 1.2410  | 0.0001 | 0.2280  | 0.3939 | 0.0238  | 0.9184 |

|             |          |           |         |        |         |        |         |        |         |        |
|-------------|----------|-----------|---------|--------|---------|--------|---------|--------|---------|--------|
| OLIGO_10984 | BF040230 | ERRFI1    | -0.0052 | 0.9920 | -0.2647 | 0.5876 | 0.2101  | 0.6116 | -0.0385 | 0.9148 |
| OLIGO_05089 | BF040233 | FAM20C    | 0.0855  | 0.8007 | 1.0891  | 0.0007 | 0.6058  | 0.0234 | 0.8156  | 0.0005 |
| OLIGO_06478 | BF040241 | MGC44505  | -0.0698 | 0.9026 | -0.4256 | 0.4630 | 0.9228  | 0.1759 | 0.6028  | 0.3151 |
| OLIGO_08910 | BF040243 | PARD6B    | 0.7223  | 0.2250 | -0.7348 | 0.2043 | 1.8299  | 0.0291 | 1.5520  | 0.0626 |
| OLIGO_07979 | BF040250 | GPKOW     | 0.2456  | 0.5459 | -0.8234 | 0.0308 | 0.3717  | 0.2438 | -0.0824 | 0.7677 |
| OLIGO_04432 | BF040254 | EPB41L3   | -0.1699 | 0.6731 | -0.1514 | 0.6876 | 0.4334  | 0.1701 | 0.6461  | 0.0193 |
| OLIGO_07339 | BF040255 | C16orf56  | -0.6347 | 0.0881 | 0.5643  | 0.1049 | -0.3899 | 0.1809 | -0.7324 | 0.0042 |
| OLIGO_08773 | BF040257 | CCT4      | -0.2471 | 0.6569 | -0.4186 | 0.4212 | -0.3780 | 0.3870 | -0.5061 | 0.1902 |
| OLIGO_05628 | BF040259 | CDK2AP2   | 0.5005  | 0.4734 | -0.5020 | 0.4419 | -0.2650 | 0.6280 | -0.3891 | 0.4166 |
| OLIGO_04431 | BF040261 | TIMM9     | 0.1949  | 0.6175 | -0.1874 | 0.6050 | -0.6022 | 0.0525 | -0.2252 | 0.4064 |
| OLIGO_11126 | BF040263 | UBE2C     | -0.1588 | 0.6404 | 0.2497  | 0.4287 | -1.1477 | 0.0000 | -1.0308 | 0.0000 |
| OLIGO_04372 | BF040266 | FLJ34048  | -0.8761 | 0.0454 | 1.2689  | 0.0020 | -0.0134 | 0.9694 | -0.0828 | 0.7885 |
| OLIGO_04366 | BF040271 | DUSP4     | 0.1225  | 0.6451 | -0.0078 | 0.9748 | 0.6528  | 0.0020 | 0.3591  | 0.0501 |
| OLIGO_07239 | BF040273 | PDE9A     | -0.5425 | 0.1637 | 0.9429  | 0.0419 | 0.0772  | 0.8030 | 0.2421  | 0.4543 |
| OLIGO_04867 | BF040281 | RAP1B     | 0.4644  | 0.5598 | -0.4675 | 0.5316 | 0.3398  | 0.5794 | -0.0719 | 0.8977 |
| OLIGO_11582 | BF040286 | WNT10B    | -0.4950 | 0.3661 | 1.0060  | 0.0823 | 0.1802  | 0.7113 | 0.1649  | 0.7215 |
| OLIGO_09411 | BF040287 | PIAS2     | 0.8971  | 0.0091 | -0.8533 | 0.0080 | -0.2416 | 0.3692 | 0.0960  | 0.6862 |
| OLIGO_09554 | BF040297 | LOC540159 | 0.4037  | 0.1245 | -0.5348 | 0.0290 | -0.2548 | 0.2206 | 0.0552  | 0.7594 |
| OLIGO_04870 | BF040300 | HMGB1     | 0.0254  | 0.9563 | -0.5864 | 0.1769 | -0.4570 | 0.2099 | -0.1578 | 0.6240 |
| OLIGO_07553 | BF040303 | FBXO18    | 0.5765  | 0.1347 | -0.7287 | 0.0440 | -0.0961 | 0.7515 | 0.1401  | 0.5958 |
| OLIGO_04863 | BF040310 | LSM14B    | 0.2886  | 0.5540 | -0.5093 | 0.2643 | -0.4753 | 0.2139 | -0.3099 | 0.3543 |
| OLIGO_04864 | BF040314 | GRPEL1    | 0.8061  | 0.0058 | -0.8402 | 0.0021 | -0.5045 | 0.0273 | -0.5001 | 0.0125 |
| OLIGO_09409 | BF040320 | C1RL      | 0.8323  | 0.0226 | -0.0583 | 0.8635 | -0.1452 | 0.6173 | -0.1055 | 0.6745 |
| OLIGO_05613 | BF040321 | PPT2      | 0.5321  | 0.0339 | -0.8171 | 0.0005 | 0.0262  | 0.8954 | 0.3522  | 0.0419 |
| OLIGO_08707 | BF040324 | LOC441150 | 0.3208  | 0.4580 | -0.0128 | 0.9747 | 0.0477  | 0.8879 | -0.1065 | 0.7195 |
| OLIGO_09407 | BF040328 | HAVCR1    | -0.6276 | 0.4270 | 0.8727  | 0.2287 | 2.3305  | 0.0001 | 2.2079  | 0.0000 |
| OLIGO_04871 | BF040336 | SCRN1     | 0.8512  | 0.0283 | -0.5370 | 0.1432 | -1.2654 | 0.0000 | -1.1230 | 0.0000 |
| OLIGO_04869 | BF040347 | SNX24     | -0.4625 | 0.5542 | -0.0151 | 0.9837 | 0.0482  | 0.9368 | -0.1945 | 0.7172 |
| OLIGO_04861 | BF040351 | SGEF      | 0.2217  | 0.4922 | -0.2329 | 0.4353 | 0.6480  | 0.0107 | 0.7458  | 0.0009 |
| OLIGO_04860 | BF040353 | RCOR1     | -0.3473 | 0.2664 | 0.3370  | 0.2489 | -0.2539 | 0.3006 | -0.3685 | 0.0896 |
| OLIGO_08806 | BF040363 | SRP19     | 0.0025  | 0.9952 | -0.2220 | 0.5638 | 0.0324  | 0.9199 | 0.0983  | 0.7276 |
| OLIGO_04041 | BF040365 | OACT1     | -0.1211 | 0.8328 | 0.0030  | 0.9957 | 0.2041  | 0.7058 | 0.0406  | 0.9368 |
| OLIGO_04037 | BF040372 | UBOX5     | 0.2427  | 0.5460 | -0.0504 | 0.8934 | -0.0615 | 0.8453 | 0.1731  | 0.5303 |
| OLIGO_07250 | BF040380 | SSU72     | 0.3994  | 0.2549 | -0.5139 | 0.1175 | 0.0060  | 0.9825 | 0.1284  | 0.5935 |

|             |          |           |         |        |         |        |         |        |         |        |
|-------------|----------|-----------|---------|--------|---------|--------|---------|--------|---------|--------|
| OLIGO_08814 | BF040383 | GLO1      | 0.4940  | 0.1883 | -0.6112 | 0.0820 | -0.3729 | 0.2050 | -0.3589 | 0.1636 |
| OLIGO_04040 | BF040384 | TMEM34    | 0.7293  | 0.0225 | -1.0451 | 0.0005 | 0.2470  | 0.3288 | 0.5116  | 0.0211 |
| OLIGO_07534 | BF040392 | AZI2      | 0.1858  | 0.4958 | 0.1487  | 0.5599 | 0.4207  | 0.0503 | 0.5454  | 0.0046 |
| OLIGO_04038 | BF040395 | C10orf104 | -0.1369 | 0.7282 | -0.3418 | 0.3857 | -0.5005 | 0.2239 | -0.0697 | 0.8371 |
| OLIGO_07486 | BF040398 | BTBD6     | -1.0172 | 0.0309 | 1.3416  | 0.0024 | 0.2390  | 0.5165 | 0.2254  | 0.4845 |
| OLIGO_09125 | BF040403 | LOC506282 | -1.7880 | 0.0010 | 2.1069  | 0.0000 | 0.3302  | 0.4381 | 0.2331  | 0.5287 |
| OLIGO_07314 | BF040412 | ABHD14B   | 0.0475  | 0.8677 | 0.5154  | 0.0541 | 0.3356  | 0.1347 | 0.3020  | 0.1240 |
| OLIGO_07212 | BF040414 | CHP       | 0.5083  | 0.0807 | -0.9946 | 0.0003 | 0.2989  | 0.1951 | 0.1450  | 0.4672 |
| OLIGO_04374 | BF040423 | MEIS2     | -1.3803 | 0.0003 | 0.9483  | 0.0073 | -0.0214 | 0.9414 | 0.2491  | 0.3279 |
| OLIGO_10931 | BF040430 | MGC134358 | 0.5363  | 0.5302 | -0.7527 | 0.3464 | -1.1448 | 0.0878 | -0.7313 | 0.2125 |
| OLIGO_07342 | BF040432 | CCT8      | 0.4680  | 0.2889 | -0.0485 | 0.9065 | -0.5661 | 0.1018 | -0.3125 | 0.3018 |
| OLIGO_04365 | BF040436 | TUBGCP3   | 0.6988  | 0.0177 | -0.5549 | 0.0430 | -0.4563 | 0.0494 | -0.2140 | 0.2890 |
| OLIGO_04368 | BF040439 | ACTR8     | 0.3709  | 0.2334 | -1.0152 | 0.0005 | -0.0903 | 0.7114 | 0.0558  | 0.7960 |
| OLIGO_04367 | BF040440 | CASP7     | -0.5038 | 0.2796 | 0.4177  | 0.3378 | 0.1331  | 0.7202 | -0.0514 | 0.8767 |
| OLIGO_04370 | BF040441 | SLC30A4   | -0.0957 | 0.8764 | -0.3555 | 0.5549 | 2.0824  | 0.0283 | 2.1286  | 0.0370 |
| OLIGO_04369 | BF040442 | NRF1      | 0.3916  | 0.3878 | -0.5127 | 0.2580 | -0.2609 | 0.5182 | -0.2881 | 0.4680 |
| OLIGO_10888 | BF040446 | CD59      | 1.0457  | 0.0253 | -1.3104 | 0.0027 | -0.5999 | 0.1030 | -0.1913 | 0.5546 |
| OLIGO_00892 | BF040453 | SPTAN1    | -0.7314 | 0.0479 | 1.0673  | 0.0021 | -0.7416 | 0.0106 | -0.4805 | 0.0582 |
| OLIGO_09378 | BF040454 | NBLA00301 | 0.2148  | 0.6280 | -0.4735 | 0.2539 | -0.8535 | 0.0142 | -0.8312 | 0.0064 |
| OLIGO_04789 | BF040456 | ADRB2     | 0.1629  | 0.8179 | 0.0972  | 0.8875 | 0.9379  | 0.1750 | 0.2055  | 0.7460 |
| OLIGO_09251 | BF040463 | LNX2      | -0.1750 | 0.5241 | -0.1747 | 0.4949 | 0.1892  | 0.3834 | 0.1905  | 0.3132 |
| OLIGO_04781 | BF040469 | HIPK3     | 0.6544  | 0.2296 | -0.3677 | 0.4577 | 0.2194  | 0.6264 | 0.2810  | 0.5341 |
| OLIGO_04783 | BF040472 | FAM98A    | -0.4422 | 0.2160 | 0.5652  | 0.0864 | 0.8468  | 0.0031 | 1.0700  | 0.0000 |
| OLIGO_00444 | BF040479 | LDB1      | 0.0694  | 0.7767 | -0.2776 | 0.2254 | -0.4964 | 0.0099 | -0.3421 | 0.0420 |
| OLIGO_09381 | BF040483 | LOC510177 | -0.1112 | 0.6900 | 0.1988  | 0.4452 | -0.1068 | 0.6263 | 0.1272  | 0.5067 |
| OLIGO_04792 | BF040487 | CES2      | 1.8312  | 0.0000 | -2.0455 | 0.0000 | 0.3521  | 0.3235 | -0.0314 | 0.9185 |
| OLIGO_04790 | BF040497 | SNAPC1    | 1.1395  | 0.0666 | -0.8732 | 0.1343 | -0.9330 | 0.0536 | -1.4557 | 0.0007 |
| OLIGO_08997 | BF040504 | ZMYND11   | -0.6101 | 0.0667 | 0.7969  | 0.0105 | -0.2645 | 0.3118 | -0.3077 | 0.1779 |
| OLIGO_06384 | BF040508 | YTHDC2    | 0.5663  | 0.1302 | -0.5822 | 0.0979 | 0.1441  | 0.5989 | 0.2706  | 0.2587 |
| OLIGO_06365 | BF040526 | C10orf77  | -0.6502 | 0.2033 | -0.1496 | 0.7539 | 0.4564  | 0.2357 | 0.0581  | 0.8642 |
| OLIGO_08805 | BF040529 | CGB7      | 0.2825  | 0.6905 | -0.3408 | 0.6222 | 1.3198  | 0.0791 | 0.5178  | 0.4276 |
| OLIGO_06360 | BF040532 | ABCA1     | 0.0225  | 0.9661 | -0.2974 | 0.5480 | 0.5349  | 0.1976 | 0.6478  | 0.0750 |
| OLIGO_04039 | BF040534 | HTRA2     | 0.3102  | 0.3224 | 0.1467  | 0.6132 | -0.2725 | 0.2742 | 0.1010  | 0.6377 |
| OLIGO_08812 | BF040535 | CDC42EP1  | 0.3042  | 0.2579 | -0.7067 | 0.0050 | -0.1492 | 0.4826 | -0.0830 | 0.6532 |

|             |          |           |         |        |         |        |         |        |         |        |
|-------------|----------|-----------|---------|--------|---------|--------|---------|--------|---------|--------|
| OLIGO_06937 | BF040539 | MADD      | 0.4212  | 0.2592 | -0.1367 | 0.6931 | -0.0665 | 0.8230 | -0.1158 | 0.6683 |
| OLIGO_08807 | BF040540 | NTE       | 0.3288  | 0.5818 | 0.5079  | 0.3581 | 0.5824  | 0.1576 | 0.0651  | 0.8555 |
| OLIGO_07987 | BF040553 | MFAP2     | -2.0017 | 0.0001 | 1.4854  | 0.0018 | 0.3579  | 0.3662 | 0.2768  | 0.4246 |
| OLIGO_04299 | BF040554 | Ddx5      | -0.3745 | 0.2073 | 0.2919  | 0.2898 | -0.3802 | 0.1072 | 0.1044  | 0.6138 |
| OLIGO_09074 | BF040558 | DENND1A   | 0.0568  | 0.8805 | -0.0653 | 0.8532 | 0.2074  | 0.4835 | 0.0694  | 0.7889 |
| OLIGO_10487 | BF040560 | LOC508632 | -0.4535 | 0.5048 | -0.5876 | 0.3515 | 1.2680  | 0.0093 | 1.1471  | 0.0072 |
| OLIGO_04294 | BF040565 | SRGAP1    | 0.1648  | 0.7445 | -0.0701 | 0.8822 | -0.6727 | 0.0902 | -0.2293 | 0.5088 |
| OLIGO_09080 | BF040572 | CRELD1    | 0.0231  | 0.9221 | 0.2650  | 0.2894 | 0.3757  | 0.1857 | 0.1636  | 0.4722 |
| OLIGO_04297 | BF040573 | ASB9      | -0.5971 | 0.2362 | 1.2772  | 0.0069 | 0.2198  | 0.5783 | 0.4212  | 0.2284 |
| OLIGO_08062 | BF040578 | RBM9      | -1.0200 | 0.0401 | 0.5745  | 0.1911 | -0.5843 | 0.1767 | -0.7405 | 0.0995 |
| OLIGO_10640 | BF040584 | U2AF1     | -0.0757 | 0.8659 | -0.4668 | 0.2942 | -0.4253 | 0.3095 | -0.1520 | 0.6872 |
| OLIGO_07477 | BF040587 | ESRRA     | -0.6863 | 0.0351 | 0.5157  | 0.0889 | 1.3278  | 0.0000 | -0.0878 | 0.6939 |
| OLIGO_09775 | BF040589 | IRF3      | -0.3767 | 0.4874 | 0.4205  | 0.4073 | -0.2626 | 0.5365 | -0.4392 | 0.2380 |
| OLIGO_09073 | BF040591 | UFC1      | 0.4080  | 0.4092 | -0.4066 | 0.3791 | -0.5518 | 0.1546 | -0.6134 | 0.0709 |
| OLIGO_04293 | BF040593 | LOC618210 | 0.2686  | 0.6101 | 0.2406  | 0.6204 | 1.3419  | 0.0006 | 0.5073  | 0.1266 |
| OLIGO_08072 | BF040599 | COX5A     | 0.7574  | 0.0213 | -0.4558 | 0.1389 | -0.1615 | 0.5324 | -0.1893 | 0.4062 |
| OLIGO_09694 | BF040602 | RHOD      | 0.9003  | 0.0795 | -0.5490 | 0.2524 | 0.2813  | 0.4837 | 0.2675  | 0.4467 |
| OLIGO_04291 | BF040603 | TEK       | -1.1112 | 0.0580 | 0.7112  | 0.1842 | 1.0085  | 0.0782 | 1.0859  | 0.0726 |
| OLIGO_10138 | BF040604 | CCDC84    | -0.0144 | 0.9870 | -0.0217 | 0.9800 | 0.5954  | 0.4808 | 0.4538  | 0.5783 |
| OLIGO_11503 | BF040606 | R3HDM2    | 0.6445  | 0.0652 | -0.4036 | 0.2150 | -0.6587 | 0.0169 | -0.5027 | 0.0365 |
| OLIGO_09079 | BF040613 | LOC513251 | -0.5401 | 0.0851 | 0.4311  | 0.1406 | 0.5621  | 0.0234 | 0.3427  | 0.1202 |
| OLIGO_04296 | BF040614 | CPSF1     | -0.2444 | 0.4775 | -0.3091 | 0.3351 | 0.0694  | 0.7983 | 0.1521  | 0.5199 |
| OLIGO_09077 | BF040615 | PPP1R13B  | -0.7231 | 0.4385 | 0.4278  | 0.6377 | 2.7999  | 0.0001 | 2.3441  | 0.0002 |
| OLIGO_09076 | BF040616 | SALL4     | 1.7057  | 0.0358 | -2.0879 | 0.0061 | 2.8179  | 0.0000 | 2.5072  | 0.0000 |
| OLIGO_04292 | BF040621 | FEM1A     | 0.4130  | 0.3017 | -0.1065 | 0.7768 | 0.0337  | 0.9136 | 0.2110  | 0.4375 |
| OLIGO_07765 | BF040631 | HSPA4     | 0.6355  | 0.1608 | -1.4470 | 0.0006 | 0.2062  | 0.5667 | -0.2715 | 0.3811 |
| OLIGO_04785 | BF040634 | BLZF1     | 0.0575  | 0.9465 | -1.1509 | 0.1849 | 1.0448  | 0.2024 | 0.8209  | 0.2950 |
| OLIGO_10854 | BF040637 | MTSS1     | -0.2979 | 0.4475 | -0.5910 | 0.1070 | 0.0518  | 0.8665 | -0.0479 | 0.8587 |
| OLIGO_04787 | BF040638 | GAL3ST3   | 0.0652  | 0.9378 | 0.0358  | 0.9634 | -0.7135 | 0.2815 | -0.3816 | 0.5055 |
| OLIGO_04791 | BF040641 | CHIC2     | 0.8362  | 0.1007 | -0.8542 | 0.0892 | -0.4332 | 0.3197 | -0.0513 | 0.8929 |
| OLIGO_08880 | BF040645 | RALBP1    | 1.0221  | 0.0034 | -1.1408 | 0.0005 | 0.2654  | 0.3295 | 0.1747  | 0.4626 |
| OLIGO_00074 | BF040652 | PLEKHC1   | 0.0555  | 0.8598 | -0.5128 | 0.0813 | -0.1112 | 0.6536 | 0.2936  | 0.1748 |
| OLIGO_10482 | BF040656 | GANAB     | 0.1854  | 0.5841 | -0.2021 | 0.5222 | 0.0170  | 0.9491 | 0.0858  | 0.7124 |
| OLIGO_06345 | BF040682 | IFT74     | 0.0786  | 0.8413 | -0.1148 | 0.7505 | -0.3102 | 0.3068 | -0.0676 | 0.7986 |

|             |          |           |         |        |         |        |         |        |         |        |
|-------------|----------|-----------|---------|--------|---------|--------|---------|--------|---------|--------|
| OLIGO_00648 | BF040688 | TSPAN7    | -0.6378 | 0.3374 | 1.7954  | 0.0041 | -2.2195 | 0.0000 | -1.3471 | 0.0033 |
| OLIGO_06294 | BF040693 | C12orf52  | 0.9991  | 0.0157 | -0.3270 | 0.3923 | -0.2982 | 0.3617 | -0.4286 | 0.1298 |
| OLIGO_06314 | BF040700 | FLJ43806  | -0.1750 | 0.7460 | 0.1959  | 0.6945 | 0.2447  | 0.5497 | -0.3446 | 0.3396 |
| OLIGO_04009 | BF040704 | CD93      | -0.2572 | 0.5271 | -0.1629 | 0.6756 | 0.2926  | 0.4426 | 0.5090  | 0.1958 |
| OLIGO_09120 | BF040705 | PSCD1     | 0.1792  | 0.6184 | 1.1262  | 0.0009 | -0.8087 | 0.0043 | -0.3485 | 0.1584 |
| OLIGO_06304 | BF040706 | LOC339105 | -0.5125 | 0.4051 | -0.4177 | 0.4789 | 0.4975  | 0.3793 | 0.5357  | 0.3414 |
| OLIGO_06325 | BF040723 | TBPL1     | 0.6940  | 0.0434 | -0.4732 | 0.1497 | 0.2930  | 0.2774 | 0.0833  | 0.7224 |
| OLIGO_10424 | BF040726 | FAM32A    | 0.1503  | 0.5726 | -0.7846 | 0.0017 | -0.5907 | 0.0052 | -0.3245 | 0.0769 |
| OLIGO_06308 | BF040729 | UBAP2L    | 0.4987  | 0.2510 | -0.3608 | 0.3743 | -0.3575 | 0.2942 | -0.2217 | 0.4604 |
| OLIGO_06340 | BF040734 | TIGD2     | -0.4599 | 0.4689 | -0.1929 | 0.7383 | 1.2774  | 0.0094 | 1.0481  | 0.0165 |
| OLIGO_08711 | BF040744 | PHYH      | -0.1653 | 0.7339 | 0.4789  | 0.2923 | 0.4408  | 0.2280 | 0.1956  | 0.5409 |
| OLIGO_04300 | BF040746 | PER1      | 0.1217  | 0.8776 | -0.7317 | 0.3537 | 0.6035  | 0.4236 | 0.6516  | 0.3750 |
| OLIGO_08901 | BF040747 | POLE3     | 0.0117  | 0.9761 | 0.1002  | 0.7845 | -0.1557 | 0.6120 | -0.0838 | 0.7552 |
| OLIGO_11504 | BF040750 | CCDC3     | 0.4581  | 0.1439 | -0.1679 | 0.5654 | -0.3582 | 0.1503 | -0.4218 | 0.0509 |
| OLIGO_09086 | BF040752 | POLA2     | -0.2613 | 0.6120 | 0.2872  | 0.5512 | 0.7806  | 0.0537 | 0.9732  | 0.0061 |
| OLIGO_09087 | BF040753 | MGC127771 | -0.7047 | 0.0451 | 0.3280  | 0.3179 | 0.1784  | 0.5169 | 0.2420  | 0.3171 |
| OLIGO_09084 | BF040761 | NR2C2     | -0.2812 | 0.3972 | -0.0321 | 0.9174 | -0.6469 | 0.0141 | -0.5219 | 0.0243 |
| OLIGO_04307 | BF040764 | AGTRAP    | 0.6032  | 0.2961 | -0.7800 | 0.1711 | 1.5171  | 0.0284 | 1.1722  | 0.0689 |
| OLIGO_02608 | BF040765 | ELL       | -0.1733 | 0.7897 | 0.1303  | 0.8302 | 0.3511  | 0.4907 | -0.3027 | 0.4988 |
| OLIGO_04301 | BF040777 | FAM58A    | 0.4806  | 0.1526 | -0.4059 | 0.2034 | 0.3418  | 0.2529 | 0.1215  | 0.6394 |
| OLIGO_04800 | BF040784 | BCDIN3    | 0.0883  | 0.7631 | 0.4836  | 0.0779 | -0.2165 | 0.3460 | -0.3607 | 0.0733 |
| OLIGO_02326 | BF040786 | LYPLA1    | -0.2971 | 0.5505 | 0.2863  | 0.5385 | -0.6647 | 0.0888 | -0.8691 | 0.0112 |
| OLIGO_04799 | BF040787 | STX10     | 0.2300  | 0.4451 | 0.2453  | 0.3866 | -0.0910 | 0.7034 | 0.2225  | 0.2820 |
| OLIGO_04798 | BF040790 | AHDC1     | 0.1779  | 0.7080 | 0.5100  | 0.2825 | 0.9097  | 0.0733 | 0.8068  | 0.0984 |
| OLIGO_04797 | BF040793 | NKIRAS2   | -0.6378 | 0.0762 | 0.3832  | 0.2497 | 0.1952  | 0.4939 | -0.2513 | 0.3072 |
| OLIGO_04803 | BF040798 | UBE3A     | 0.8969  | 0.0130 | -0.8211 | 0.0147 | -0.5687 | 0.0456 | -0.0868 | 0.7256 |
| OLIGO_04801 | BF040805 | ISOC2     | 0.7825  | 0.0038 | -0.3146 | 0.2088 | -0.2965 | 0.1621 | -0.4139 | 0.0254 |
| OLIGO_07694 | BF040808 | ZNF1      | -0.5137 | 0.1500 | 0.9645  | 0.0042 | -0.0472 | 0.8660 | -0.0121 | 0.9606 |
| OLIGO_04794 | BF040813 | STAM      | 0.7681  | 0.0428 | -0.7534 | 0.0347 | -0.1076 | 0.7166 | -0.0186 | 0.9429 |
| OLIGO_08696 | BF040821 | PTDSR     | 0.2301  | 0.4708 | 0.3183  | 0.2863 | -0.0364 | 0.8855 | 0.0363  | 0.8713 |
| OLIGO_04796 | BF040826 | NRP2      | -0.4540 | 0.1882 | 0.5569  | 0.0846 | 0.3673  | 0.1742 | 0.0601  | 0.7994 |
| OLIGO_08986 | BF040829 | PSMB7     | 0.1893  | 0.7201 | -0.5260 | 0.2874 | -0.3634 | 0.3802 | -0.2443 | 0.5004 |
| OLIGO_04805 | BF040834 | LUZP1     | 1.1792  | 0.0001 | -0.9540 | 0.0004 | -0.3964 | 0.0831 | -0.1694 | 0.3917 |
| OLIGO_10413 | BF040840 | SLC37A2   | -0.3943 | 0.6560 | -0.0968 | 0.9061 | 3.0328  | 0.0000 | 2.6369  | 0.0000 |

|             |          |               |         |        |         |        |         |        |         |        |
|-------------|----------|---------------|---------|--------|---------|--------|---------|--------|---------|--------|
| OLIGO_08727 | BF040841 | NRG2          | 0.9055  | 0.2193 | -0.1372 | 0.8421 | -0.5827 | 0.3361 | -0.4669 | 0.3616 |
| OLIGO_11321 | BF040847 | FAM3A         | 0.0897  | 0.8167 | -0.4519 | 0.2123 | 0.1453  | 0.6326 | 0.0146  | 0.9567 |
| OLIGO_08726 | BF040848 | DC-UbP        | 0.1456  | 0.7375 | 0.7047  | 0.1467 | 0.7190  | 0.1649 | 0.8630  | 0.1636 |
| OLIGO_06262 | BF040850 | MITF          | 0.9923  | 0.0024 | -0.7183 | 0.0182 | 0.3986  | 0.1231 | 0.6296  | 0.0051 |
| OLIGO_03990 | BF040851 | ALG5          | 0.2018  | 0.5064 | -0.1944 | 0.4939 | 0.2669  | 0.2625 | 0.3922  | 0.0603 |
| OLIGO_07164 | BF040853 | CST6          | -1.1719 | 0.0071 | 1.7739  | 0.0000 | -0.0288 | 0.9335 | -0.5221 | 0.0881 |
| OLIGO_03015 | BF040858 | DNAJC14       | 0.2137  | 0.6226 | 0.7185  | 0.1184 | -0.3163 | 0.4205 | -0.4247 | 0.2885 |
| OLIGO_06245 | BF040860 | TXN           | 0.3977  | 0.4761 | -0.6553 | 0.2088 | -1.0461 | 0.0175 | -1.0022 | 0.0092 |
| OLIGO_06240 | BF040866 | AP1M2         | 0.4899  | 0.2884 | -0.0047 | 0.9912 | 0.4004  | 0.2680 | 0.3474  | 0.2723 |
| OLIGO_06239 | BF040867 | TRIM6         | 0.2688  | 0.7301 | -0.7816 | 0.3116 | 2.1630  | 0.0182 | 1.4012  | 0.0790 |
| OLIGO_06236 | BF040868 | PLAA          | 0.9298  | 0.1097 | -0.3468 | 0.5230 | 0.0330  | 0.9422 | 0.4127  | 0.3003 |
| OLIGO_07795 | BF040869 | LGR8          | -0.1000 | 0.8410 | 0.0478  | 0.9170 | 0.5053  | 0.1892 | 0.9981  | 0.0036 |
| OLIGO_07889 | BF040871 | AP2A1         | 0.8818  | 0.1106 | -0.6129 | 0.2354 | -0.7437 | 0.0860 | -0.6573 | 0.0831 |
| OLIGO_06237 | BF040872 | HIATL1        | 0.9033  | 0.0516 | -0.3996 | 0.3043 | -0.8283 | 0.0732 | -0.3098 | 0.3870 |
| OLIGO_06238 | BF040873 | FLJ22662      | -0.4015 | 0.6628 | -0.1428 | 0.8714 | 0.1011  | 0.9048 | 0.1529  | 0.8529 |
| OLIGO_06286 | BF040874 | LOC646431     | -0.7342 | 0.3889 | 0.7629  | 0.3581 | -0.5267 | 0.5132 | -0.2050 | 0.7909 |
| OLIGO_06912 | BF040878 | EIF4A2        | -0.2134 | 0.6403 | -0.2385 | 0.5765 | -0.2451 | 0.4934 | -0.2935 | 0.3489 |
| OLIGO_11538 | BF040891 | RNASEH1       | 0.2831  | 0.5450 | 0.0491  | 0.9106 | -0.1458 | 0.6923 | 0.2615  | 0.4316 |
| OLIGO_06287 | BF040897 | LOC617052     | 0.7218  | 0.0009 | -0.6334 | 0.0018 | -0.1989 | 0.2450 | -0.0157 | 0.9162 |
| OLIGO_11744 | BF040899 | 5031439G07Rik | 0.4976  | 0.4427 | -0.4448 | 0.4753 | -1.4829 | 0.0032 | -0.9716 | 0.0269 |
| OLIGO_04308 | BF040906 | CSPG6         | 0.1581  | 0.6117 | -0.0576 | 0.8428 | 0.1028  | 0.6752 | -0.2255 | 0.2923 |
| OLIGO_09019 | BF040914 | PTK2B         | -0.2898 | 0.4689 | 0.4408  | 0.2391 | -0.0723 | 0.8178 | -0.1679 | 0.5411 |
| OLIGO_09032 | BF040917 | TGM1          | -0.3458 | 0.6318 | 0.0321  | 0.9621 | 0.2505  | 0.6578 | 0.0138  | 0.9778 |
| OLIGO_10880 | BF040923 | VPS28         | 0.7620  | 0.0301 | -0.4202 | 0.1967 | -0.6765 | 0.0133 | -0.4464 | 0.0617 |
| OLIGO_04304 | BF040925 | LOC508867     | 0.5349  | 0.2159 | -0.5272 | 0.1922 | 0.0706  | 0.8348 | 0.2276  | 0.4426 |
| OLIGO_04306 | BF040926 | 4930519N16Rik | 0.0835  | 0.8691 | -0.1360 | 0.7687 | 0.3840  | 0.3199 | 0.4857  | 0.1549 |
| OLIGO_04305 | BF040927 | FAM107B       | 0.3155  | 0.3256 | -0.0812 | 0.7868 | -0.5910 | 0.0201 | -0.5560 | 0.0120 |
| OLIGO_09991 | BF040939 | ASCC1         | -0.4460 | 0.3250 | 0.5413  | 0.2044 | -0.3389 | 0.3398 | -0.4886 | 0.1162 |
| OLIGO_11599 | BF040948 | NUDT3         | 0.4627  | 0.2065 | -0.8087 | 0.0185 | -1.2313 | 0.0000 | -0.7505 | 0.0029 |
| OLIGO_04742 | BF040950 | DDO           | 0.0484  | 0.9056 | 0.2773  | 0.4624 | 0.1749  | 0.5649 | 0.0264  | 0.9212 |
| OLIGO_11562 | BF040962 | SDC2          | -0.6322 | 0.0094 | 0.7650  | 0.0008 | -0.0410 | 0.8308 | 0.0716  | 0.6673 |
| OLIGO_09345 | BF040968 | PLDN          | -0.5126 | 0.0752 | 0.3300  | 0.2198 | 0.3362  | 0.1371 | 0.2533  | 0.2000 |
| OLIGO_10970 | BF040969 | MAPK1         | -0.3747 | 0.5670 | 0.2402  | 0.7060 | -0.3612 | 0.5639 | -0.4448 | 0.4653 |
| OLIGO_02261 | BF040970 | AGPAT2        | -0.2092 | 0.5048 | 0.0722  | 0.8055 | -0.0154 | 0.9499 | 0.1374  | 0.5232 |

|             |          |           |         |        |         |        |         |        |         |        |
|-------------|----------|-----------|---------|--------|---------|--------|---------|--------|---------|--------|
| OLIGO_09272 | BF040973 | PPP1R11   | 0.1361  | 0.6579 | -0.0885 | 0.7581 | -0.0162 | 0.9464 | 0.0569  | 0.7895 |
| OLIGO_04738 | BF040980 | MXD4      | -0.5077 | 0.4016 | 0.6633  | 0.2506 | 0.5400  | 0.2540 | 0.0100  | 0.9807 |
| OLIGO_11759 | BF040992 | LOC531863 | 0.1678  | 0.6240 | -0.2449 | 0.4443 | 0.0316  | 0.9062 | 0.0599  | 0.7987 |
| OLIGO_08863 | BF040995 | TMEM121   | -1.6153 | 0.0015 | 2.6115  | 0.0000 | 0.3206  | 0.4256 | 0.4000  | 0.2543 |
| OLIGO_04741 | BF040997 | NR2F2     | -0.5580 | 0.5346 | 0.7384  | 0.3615 | 1.8220  | 0.0045 | 1.3033  | 0.0197 |
| OLIGO_06942 | BF041001 | DRAP1     | -0.5270 | 0.0690 | 0.5940  | 0.0285 | -0.6810 | 0.0028 | -0.5494 | 0.0058 |
| OLIGO_04739 | BF041010 | SMG7      | -0.4548 | 0.2752 | 0.7740  | 0.0474 | -0.1091 | 0.7382 | -0.3783 | 0.1860 |
| OLIGO_04732 | BF041013 | RANBP10   | 0.0213  | 0.9617 | 0.1708  | 0.6809 | 0.0602  | 0.8626 | -0.1398 | 0.6465 |
| OLIGO_09039 | BF041015 | HUS1      | 0.2828  | 0.3442 | -0.4068 | 0.2035 | -0.4797 | 0.1895 | -0.4107 | 0.2642 |
| OLIGO_03363 | BF041031 | PYGB      | -0.8337 | 0.0226 | 1.9285  | 0.0000 | -0.0589 | 0.8382 | 0.0230  | 0.9267 |
| OLIGO_04677 | BF041037 | BMP2K     | 0.2613  | 0.4356 | 0.1937  | 0.5366 | 0.2065  | 0.4326 | 0.1554  | 0.5039 |
| OLIGO_04664 | BF041041 | C10orf32  | -0.4534 | 0.1026 | 0.5257  | 0.0432 | 0.5814  | 0.0077 | 0.3322  | 0.0813 |
| OLIGO_04667 | BF041044 | CD200R2   | -0.3945 | 0.3575 | 0.1710  | 0.6621 | 0.4998  | 0.1265 | 0.0069  | 0.9810 |
| OLIGO_04243 | BF041056 | BAT5      | 0.2865  | 0.4149 | -0.2494 | 0.4476 | 0.4644  | 0.0929 | 0.3397  | 0.1595 |
| OLIGO_04242 | BF041062 | FBXO28    | 0.5427  | 0.3515 | -0.3007 | 0.5819 | 0.7527  | 0.0936 | 0.7952  | 0.0433 |
| OLIGO_04245 | BF041076 | STXBP5    | 0.0018  | 0.9972 | -0.0012 | 0.9980 | 1.1772  | 0.0030 | 1.3280  | 0.0001 |
| OLIGO_12544 | BF041085 | HNRPH2    | 0.4123  | 0.4494 | -0.7769 | 0.1279 | -0.4932 | 0.2484 | -0.4645 | 0.2145 |
| OLIGO_09034 | BF041100 | LOC641705 | -0.3083 | 0.4685 | 0.2707  | 0.4962 | 0.4106  | 0.2183 | 0.2347  | 0.4229 |
| OLIGO_09534 | BF041103 | LOC615180 | -0.3387 | 0.3545 | 0.1352  | 0.6925 | 0.3058  | 0.2862 | 0.2179  | 0.3854 |
| OLIGO_07673 | BF041104 | ZCCHC3    | -0.2724 | 0.3536 | 0.5564  | 0.1133 | -0.3466 | 0.2862 | -0.3608 | 0.2892 |
| OLIGO_04248 | BF041110 | STAT5A    | 0.1571  | 0.6576 | 0.2052  | 0.5360 | -0.2440 | 0.3800 | -0.1368 | 0.5739 |
| OLIGO_04239 | BF041123 | ADAMDEC1  | -0.5990 | 0.4556 | 0.8439  | 0.2522 | 0.2381  | 0.6984 | 0.5265  | 0.3317 |
| OLIGO_04240 | BF041124 | RFX4      | -0.0282 | 0.9627 | 0.2478  | 0.6699 | 0.1130  | 0.8362 | 0.0705  | 0.8927 |
| OLIGO_09278 | BF041126 | DNAJC12   | -0.2530 | 0.7102 | 0.2275  | 0.7209 | -1.2776 | 0.0171 | -1.3308 | 0.0047 |
| OLIGO_11465 | BF041127 | AP2A2     | -0.7480 | 0.0159 | 0.6565  | 0.0226 | -0.1350 | 0.5819 | -0.2561 | 0.2275 |
| OLIGO_09277 | BF041129 | PIM1      | 0.2290  | 0.5247 | -0.2861 | 0.3954 | 0.1583  | 0.5747 | 0.2716  | 0.2716 |
| OLIGO_04608 | BF041131 | WNT11     | 0.1911  | 0.8375 | -0.1171 | 0.8972 | 0.1763  | 0.8398 | 0.1895  | 0.8218 |
| OLIGO_04607 | BF041132 | ITGB6     | 0.4076  | 0.3873 | 0.1779  | 0.6870 | 0.7559  | 0.0345 | 0.7212  | 0.0218 |
| OLIGO_04610 | BF041138 | FOXO3A    | 0.5076  | 0.3532 | 0.0706  | 0.8894 | -0.4055 | 0.3405 | -0.3958 | 0.2881 |
| OLIGO_04612 | BF041142 | GPR137B   | 0.2461  | 0.3960 | 0.2795  | 0.3011 | -0.8054 | 0.0005 | -0.3147 | 0.1148 |
| OLIGO_04604 | BF041146 | C9orf89   | 0.0074  | 0.9792 | -0.0910 | 0.7309 | 0.0635  | 0.7745 | -0.2172 | 0.2633 |
| OLIGO_07819 | BF041160 | TBX2      | 0.4194  | 0.2445 | -0.4523 | 0.1764 | -0.3221 | 0.2503 | -0.2652 | 0.2796 |
| OLIGO_09203 | BF041163 | LOX       | 0.6932  | 0.2037 | 0.2366  | 0.6465 | -0.1015 | 0.8119 | -0.3284 | 0.3795 |
| OLIGO_11554 | BF041165 | LOC617216 | -0.0724 | 0.8171 | -0.5620 | 0.0538 | 0.1952  | 0.4319 | 0.2667  | 0.2151 |

|             |          |           |         |        |         |        |         |        |         |        |
|-------------|----------|-----------|---------|--------|---------|--------|---------|--------|---------|--------|
| OLIGO_09321 | BF041168 | MGC127809 | -0.2805 | 0.5137 | -0.1836 | 0.6410 | 0.4059  | 0.2040 | 0.0889  | 0.7505 |
| OLIGO_04675 | BF041171 | C1orf82   | 0.4422  | 0.1806 | -1.2527 | 0.0001 | -0.2177 | 0.4048 | 0.2395  | 0.2909 |
| OLIGO_09315 | BF041173 | LOC538883 | 0.2116  | 0.7228 | -0.7627 | 0.1722 | 1.7996  | 0.0001 | 1.8717  | 0.0000 |
| OLIGO_04676 | BF041174 | BCL6      | 0.2615  | 0.7037 | -0.6751 | 0.3237 | 1.7072  | 0.0361 | 1.0663  | 0.1246 |
| OLIGO_11441 | BF041175 | ITPK1     | 0.6817  | 0.0291 | -0.5142 | 0.0781 | 0.3318  | 0.1747 | 0.3191  | 0.1360 |
| OLIGO_04673 | BF041177 | SLC44A1   | 0.5390  | 0.2414 | -0.7696 | 0.0997 | -0.1063 | 0.7808 | 0.2379  | 0.5203 |
| OLIGO_11553 | BF041179 | LOC524085 | -0.7761 | 0.2091 | 0.9643  | 0.0954 | 0.3381  | 0.4846 | 0.2353  | 0.5785 |
| OLIGO_02156 | BF041186 | HK3       | -1.0140 | 0.0227 | 1.6783  | 0.0001 | -0.3632 | 0.3040 | -0.4858 | 0.1205 |
| OLIGO_04680 | BF041187 | GRHL1     | -0.0859 | 0.9065 | -0.2646 | 0.7117 | 0.6227  | 0.3709 | 0.3492  | 0.5881 |
| OLIGO_10091 | BF041190 | POLS      | 0.0977  | 0.7334 | 0.2747  | 0.3498 | -0.8558 | 0.0783 | -0.1809 | 0.5100 |
| OLIGO_09319 | BF041196 | KIAA0323  | -0.0400 | 0.8987 | 0.2548  | 0.3857 | 0.0114  | 0.9630 | -0.1773 | 0.4106 |
| OLIGO_10552 | BF041198 | TF        | -2.9606 | 0.0000 | 2.6039  | 0.0000 | -0.5179 | 0.3078 | -1.8022 | 0.0000 |
| OLIGO_03255 | BF041201 | POLR1C    | 0.3998  | 0.1909 | -0.3970 | 0.1649 | -0.8413 | 0.0005 | -0.5068 | 0.0159 |
| OLIGO_09313 | BF041202 | LOC615893 | 0.4364  | 0.3294 | 0.5660  | 0.2030 | -0.0236 | 0.9507 | 0.0185  | 0.9590 |
| OLIGO_04665 | BF041204 | ZXDB      | -0.0198 | 0.9614 | 0.1733  | 0.6478 | 0.7246  | 0.0201 | 0.3696  | 0.1748 |
| OLIGO_04670 | BF041209 | RIP       | -0.0957 | 0.8124 | -0.4184 | 0.2677 | 0.6322  | 0.0478 | 0.4214  | 0.1291 |
| OLIGO_04669 | BF041210 | LOC530874 | -0.6802 | 0.4034 | -0.0345 | 0.9621 | 2.7480  | 0.0336 | 2.2051  | 0.0813 |
| OLIGO_07297 | BF041227 | KDELR2    | -0.5507 | 0.1156 | 0.0837  | 0.7970 | 0.8835  | 0.0015 | 0.6052  | 0.0121 |
| OLIGO_04183 | BF041243 | CDC23     | -0.4071 | 0.3457 | 0.1131  | 0.7771 | 0.3612  | 0.2835 | -0.0311 | 0.9174 |
| OLIGO_04185 | BF041253 | MLSTD1    | 0.0092  | 0.9770 | 0.6268  | 0.0365 | -0.3316 | 0.1921 | 0.1794  | 0.4215 |
| OLIGO_11486 | BF041272 | TRAF3     | 0.2595  | 0.6567 | -0.1476 | 0.7882 | 1.2098  | 0.0084 | 0.9806  | 0.0146 |
| OLIGO_04184 | BF041273 | FCGR1A    | 0.8149  | 0.0632 | -0.5689 | 0.1640 | -0.2128 | 0.5322 | -0.2191 | 0.4620 |
| OLIGO_08981 | BF041275 | LOC63929  | 0.0507  | 0.8706 | 0.0261  | 0.9280 | 0.1203  | 0.6114 | 0.1341  | 0.5176 |
| OLIGO_11173 | BF041278 | HSP90AA1  | 0.7375  | 0.0863 | -0.9558 | 0.0176 | -0.8050 | 0.0170 | -0.6235 | 0.0347 |
| OLIGO_04601 | BF041284 | COG8      | -1.1047 | 0.1595 | 1.3133  | 0.0740 | 2.9913  | 0.0000 | 2.5450  | 0.0000 |
| OLIGO_09280 | BF041287 | NLK       | -0.0178 | 0.9721 | -0.1245 | 0.7955 | -0.2379 | 0.5493 | -0.3296 | 0.3434 |
| OLIGO_09279 | BF041292 | LHFPL2    | 0.0926  | 0.8553 | -0.0760 | 0.8727 | -0.2247 | 0.5722 | -0.0129 | 0.9705 |
| OLIGO_08936 | BF041297 | RGR       | 0.5545  | 0.1197 | -0.6139 | 0.0999 | 0.2587  | 0.3949 | -0.2099 | 0.4662 |
| OLIGO_03550 | BF041298 | MLLT7     | -0.5531 | 0.2281 | 0.5929  | 0.1663 | 1.7557  | 0.0000 | 1.6313  | 0.0000 |
| OLIGO_09284 | BF041299 | GYLTL1B   | 0.4406  | 0.3268 | -0.1845 | 0.6599 | 0.4538  | 0.2039 | 0.1389  | 0.6622 |
| OLIGO_04606 | BF041307 | LGALS1    | 0.3053  | 0.4490 | -0.0809 | 0.8302 | 0.6723  | 0.0338 | 0.4254  | 0.1245 |
| OLIGO_09392 | BF041308 | LOC512949 | 0.5691  | 0.4790 | -0.7115 | 0.3441 | -0.0317 | 0.9599 | -0.1953 | 0.7232 |
| OLIGO_04603 | BF041310 | SPAG1     | 0.4657  | 0.2610 | -0.0495 | 0.8989 | 0.2935  | 0.3656 | 0.3914  | 0.1685 |
| OLIGO_04602 | BF041311 | Rps6ka6   | -0.2398 | 0.5054 | -0.1664 | 0.6212 | 0.6948  | 0.0141 | -0.0578 | 0.8148 |

|             |          |           |         |        |         |        |         |        |         |        |
|-------------|----------|-----------|---------|--------|---------|--------|---------|--------|---------|--------|
| OLIGO_09281 | BF041316 | MYST1     | 1.0255  | 0.2535 | -0.9104 | 0.2967 | 0.3558  | 0.6705 | 0.1892  | 0.8147 |
| OLIGO_09051 | BF041320 | ATXN3     | 0.2442  | 0.4973 | -0.7006 | 0.0378 | 0.4764  | 0.0916 | 0.9176  | 0.0002 |
| OLIGO_05032 | BF041329 | CDK5RAP1  | 0.6361  | 0.0431 | -0.9699 | 0.0010 | 0.1020  | 0.6788 | -0.0983 | 0.6482 |
| OLIGO_05028 | BF041336 | TRIM24    | -0.0991 | 0.8703 | 0.1553  | 0.7843 | 0.5682  | 0.2323 | 0.3931  | 0.3452 |
| OLIGO_05029 | BF041338 | C20orf7   | -0.1473 | 0.7311 | -0.1186 | 0.7674 | -0.2563 | 0.4592 | -0.4874 | 0.1067 |
| OLIGO_05030 | BF041340 | ME1       | -0.0860 | 0.8073 | 0.4052  | 0.2180 | -0.8425 | 0.0027 | -0.6733 | 0.0058 |
| OLIGO_05020 | BF041343 | FGFR2     | -0.0680 | 0.8621 | 0.1804  | 0.6187 | 0.4943  | 0.1068 | 0.1911  | 0.4741 |
| OLIGO_05021 | BF041346 | FLJ12716  | 0.3077  | 0.4080 | -0.0840 | 0.8090 | 0.2544  | 0.3828 | 0.1745  | 0.4940 |
| OLIGO_10624 | BF041354 | HNRPC     | 0.0306  | 0.9294 | -0.0371 | 0.9084 | -0.4903 | 0.0702 | -0.3716 | 0.1168 |
| OLIGO_11605 | BF041356 | C2orf33   | 0.4517  | 0.1240 | -0.5693 | 0.0383 | -0.4624 | 0.0452 | -0.3165 | 0.1166 |
| OLIGO_05025 | BF041358 | EIF4B     | 0.3067  | 0.5378 | -0.4326 | 0.3658 | 0.1842  | 0.6328 | 0.0918  | 0.7855 |
| OLIGO_09238 | BF041368 | PUM1      | 0.0998  | 0.8105 | -0.3383 | 0.3849 | 0.3585  | 0.2760 | 0.3030  | 0.2899 |
| OLIGO_10164 | BF041372 | ILKAP     | -0.1232 | 0.7138 | 0.2735  | 0.3842 | -0.2480 | 0.3465 | 0.2086  | 0.3657 |
| OLIGO_05022 | BF041378 | RNUXA     | 0.4729  | 0.1950 | -0.8879 | 0.0092 | 0.3900  | 0.1768 | 0.5748  | 0.0223 |
| OLIGO_08257 | BF041379 | MYO5B     | -0.0219 | 0.9365 | 0.4869  | 0.0587 | -0.4160 | 0.0542 | -0.3232 | 0.0872 |
| OLIGO_05024 | BF041383 | 40243.00  | 0.3285  | 0.2457 | -0.5135 | 0.0527 | 0.0667  | 0.7635 | -0.1454 | 0.4537 |
| OLIGO_05023 | BF041387 | MST101    | 0.7761  | 0.0466 | -1.1872 | 0.0011 | 0.6927  | 0.0253 | 0.3828  | 0.1523 |
| OLIGO_07313 | BF041390 | GPR172B   | -0.3775 | 0.0937 | 1.0869  | 0.0000 | 0.2891  | 0.1061 | 0.1043  | 0.4983 |
| OLIGO_08815 | BF041392 | ZNF322A   | 1.6084  | 0.0016 | -0.6180 | 0.2050 | 0.2712  | 0.4933 | 0.2772  | 0.4239 |
| OLIGO_10509 | BF041399 | COX6A1    | 0.0921  | 0.8220 | -0.3991 | 0.2974 | -0.0328 | 0.9185 | -0.5492 | 0.0510 |
| OLIGO_00720 | BF041407 | DHX29     | 0.2011  | 0.4252 | -0.4766 | 0.0426 | -0.2205 | 0.2697 | -0.1168 | 0.5000 |
| OLIGO_04125 | BF041416 | TBC1D15   | -0.1193 | 0.8079 | -0.5089 | 0.2521 | 0.2841  | 0.4391 | 0.0041  | 0.9898 |
| OLIGO_08933 | BF041420 | RAVER1    | -0.5929 | 0.1188 | 0.8143  | 0.0222 | 0.0902  | 0.7618 | -0.2203 | 0.3978 |
| OLIGO_04114 | BF041422 | SFRS2IP   | 0.3229  | 0.4731 | -0.5704 | 0.1757 | -0.3977 | 0.2597 | -0.0703 | 0.8197 |
| OLIGO_04128 | BF041425 | GLTP      | 0.5387  | 0.1796 | -0.1781 | 0.6369 | 0.7229  | 0.0218 | 0.5790  | 0.0357 |
| OLIGO_11591 | BF041426 | LRRFIP2   | 0.2158  | 0.6744 | -0.5288 | 0.2714 | -0.1033 | 0.7975 | 0.0323  | 0.9269 |
| OLIGO_04545 | BF041430 | UCK1      | 0.8111  | 0.2344 | -0.5273 | 0.4083 | -0.4679 | 0.3976 | -0.5672 | 0.2410 |
| OLIGO_07941 | BF041432 | PPME1     | 0.3503  | 0.3343 | -0.1504 | 0.6574 | -0.2746 | 0.3342 | -0.0555 | 0.8236 |
| OLIGO_06804 | BF041433 | RFP2      | 0.0015  | 0.9966 | 0.4426  | 0.1933 | -0.5869 | 0.0352 | -0.6431 | 0.0083 |
| OLIGO_04538 | BF041437 | IWS1      | -0.0708 | 0.8862 | -0.0404 | 0.9303 | 0.2291  | 0.5546 | 0.2500  | 0.4614 |
| OLIGO_04536 | BF041447 | CENPJ     | 0.5145  | 0.5770 | -0.6394 | 0.4808 | 0.0609  | 0.9455 | 0.0339  | 0.9688 |
| OLIGO_04543 | BF041453 | SLC4A5    | 0.5431  | 0.0700 | -0.5323 | 0.0554 | 0.1765  | 0.4579 | 0.0818  | 0.6896 |
| OLIGO_04544 | BF041455 | POLR2I    | -0.1625 | 0.5412 | 0.2697  | 0.2769 | 0.3926  | 0.0619 | -0.0763 | 0.6765 |
| OLIGO_10886 | BF041457 | LOC510090 | -0.1468 | 0.8263 | -0.2393 | 0.7091 | 1.2749  | 0.0795 | 1.4875  | 0.0595 |

|             |          |           |         |        |         |        |         |        |         |        |
|-------------|----------|-----------|---------|--------|---------|--------|---------|--------|---------|--------|
| OLIGO_02283 | BF041459 | USP30     | -0.0458 | 0.9014 | 0.5797  | 0.0938 | 0.8296  | 0.0047 | 0.2929  | 0.2491 |
| OLIGO_04534 | BF041463 | GRINL1A   | -0.1598 | 0.7318 | -0.0466 | 0.9152 | 0.3905  | 0.2870 | 0.1229  | 0.7011 |
| OLIGO_09191 | BF041467 | UNC50     | 0.3393  | 0.2132 | -0.6510 | 0.0109 | -0.0501 | 0.8145 | 0.0695  | 0.7098 |
| OLIGO_10672 | BF041480 | API5      | -0.2239 | 0.6162 | -0.0951 | 0.8193 | 0.1900  | 0.5901 | 0.3163  | 0.3033 |
| OLIGO_07566 | BF041481 | DDX48     | 0.3152  | 0.3607 | -0.2683 | 0.4055 | -0.2967 | 0.2732 | -0.2440 | 0.3079 |
| OLIGO_04539 | BF041486 | TCAM1     | 1.3992  | 0.0093 | -0.2482 | 0.6205 | -1.7550 | 0.0001 | -2.0171 | 0.0000 |
| OLIGO_04541 | BF041501 | LOC515651 | -0.0830 | 0.6878 | 0.4564  | 0.0177 | -0.0361 | 0.8256 | 0.0702  | 0.6201 |
| OLIGO_05027 | BF041503 | LOC113179 | 0.3412  | 0.6784 | 0.1686  | 0.8266 | -0.3015 | 0.6401 | -0.1759 | 0.7555 |
| OLIGO_05026 | BF041505 | SUPT16H   | -0.1969 | 0.7737 | 0.7254  | 0.2576 | 0.8454  | 0.1213 | 0.1973  | 0.6800 |
| OLIGO_09338 | BF041516 | AMFR      | 0.0445  | 0.8665 | 0.1537  | 0.5329 | -0.3142 | 0.1340 | -0.3287 | 0.0715 |
| OLIGO_01593 | BF041521 | C17orf32  | -0.0327 | 0.9241 | -0.4084 | 0.2038 | -0.1168 | 0.6648 | -0.0700 | 0.7689 |
| OLIGO_05039 | BF041533 | SP1       | -0.0692 | 0.7799 | -0.0827 | 0.7210 | -0.4771 | 0.0146 | -0.3336 | 0.0528 |
| OLIGO_05043 | BF041536 | CLEC3B    | -0.5409 | 0.4923 | 0.9525  | 0.2279 | 0.6902  | 0.3510 | 0.2065  | 0.7639 |
| OLIGO_09496 | BF041538 | MDC1      | 0.4501  | 0.4263 | 0.2011  | 0.7105 | -0.3003 | 0.5661 | -0.4265 | 0.4053 |
| OLIGO_08702 | BF041539 | PODXL2    | 0.1195  | 0.8560 | -0.1267 | 0.8370 | -0.4854 | 0.3473 | -0.2911 | 0.5195 |
| OLIGO_05037 | BF041541 | WDR50     | 0.5534  | 0.3485 | 0.0685  | 0.9030 | -0.1481 | 0.7352 | -0.0507 | 0.8950 |
| OLIGO_08969 | BF041545 | ESM1      | 0.1635  | 0.8051 | -0.2367 | 0.6997 | 2.0049  | 0.0001 | 2.3405  | 0.0000 |
| OLIGO_05045 | BF041548 | USP52     | -0.2726 | 0.3725 | -0.0707 | 0.8046 | -0.0995 | 0.6781 | -0.1706 | 0.4211 |
| OLIGO_04121 | BF041549 | DDX56     | 0.7176  | 0.2244 | -0.6873 | 0.2312 | -0.9279 | 0.1165 | -0.1754 | 0.7320 |
| OLIGO_04120 | BF041552 | MEF2D     | 1.0865  | 0.0766 | -0.6299 | 0.2565 | -0.6896 | 0.2059 | -0.3427 | 0.4815 |
| OLIGO_11540 | BF041553 | WWC2      | 0.4815  | 0.2102 | -0.1607 | 0.6545 | 1.1736  | 0.0001 | 1.1989  | 0.0000 |
| OLIGO_04117 | BF041567 | B3GNT8    | 0.2117  | 0.6936 | -0.0100 | 0.9847 | 0.2192  | 0.6604 | 0.1625  | 0.7342 |
| OLIGO_11487 | BF041569 | ADAM17    | 0.2825  | 0.4498 | -0.7631 | 0.0722 | -0.2231 | 0.5116 | -0.1049 | 0.7384 |
| OLIGO_04118 | BF041570 | LOC404066 | 0.5245  | 0.4042 | -0.3711 | 0.5440 | -0.2990 | 0.6143 | 0.2259  | 0.6942 |
| OLIGO_04124 | BF041580 | TTC5      | -0.0108 | 0.9711 | 0.2815  | 0.3231 | -0.4352 | 0.0611 | -0.0489 | 0.8131 |
| OLIGO_08932 | BF041582 | TMED3     | -0.0504 | 0.8503 | 0.5560  | 0.0263 | 0.1341  | 0.5215 | -0.1275 | 0.4862 |
| OLIGO_11308 | BF041583 | EIF3S3    | 0.1430  | 0.6880 | -0.2707 | 0.4149 | -0.3714 | 0.1869 | -0.2629 | 0.2830 |
| OLIGO_11471 | BF041588 | TBRG4     | 0.0187  | 0.9474 | -0.4360 | 0.1006 | -0.3431 | 0.1230 | -0.4601 | 0.0184 |
| OLIGO_04115 | BF041590 | FLJ41747  | 0.5776  | 0.0815 | -0.2267 | 0.4511 | -0.2504 | 0.3260 | 0.1334  | 0.5453 |
| OLIGO_04113 | BF041597 | DDX23     | -0.1398 | 0.8685 | 0.0558  | 0.9459 | -1.0064 | 0.2253 | -0.3886 | 0.6165 |
| OLIGO_04112 | BF041598 | DLX3      | 0.6338  | 0.1061 | -0.8525 | 0.0194 | -0.0041 | 0.9894 | 0.0697  | 0.7961 |
| OLIGO_08889 | BF041602 | MGC42367  | -0.7382 | 0.1250 | 1.3581  | 0.0026 | 0.6190  | 0.1007 | 0.2121  | 0.5200 |
| OLIGO_08938 | BF041604 | C2orf7    | -0.4794 | 0.1035 | 0.4927  | 0.0734 | 0.5656  | 0.0156 | 0.2727  | 0.1766 |
| OLIGO_04127 | BF041605 | NCOA2     | -0.2680 | 0.6393 | 0.4863  | 0.3901 | 0.9448  | 0.1372 | 0.4137  | 0.4221 |

|             |          |           |         |        |         |        |         |        |         |        |
|-------------|----------|-----------|---------|--------|---------|--------|---------|--------|---------|--------|
| OLIGO_06974 | BF041607 | MRFAP1    | -0.0978 | 0.8192 | 0.4605  | 0.2500 | 0.3354  | 0.3183 | 0.5926  | 0.0464 |
| OLIGO_11671 | BF041610 | RPRC1     | -1.6942 | 0.0012 | 2.2776  | 0.0000 | -1.3792 | 0.0008 | -1.1868 | 0.0010 |
| OLIGO_04116 | BF041614 | GATA3     | 1.8009  | 0.0051 | -2.3450 | 0.0001 | 1.6076  | 0.0018 | 1.3605  | 0.0024 |
| OLIGO_09245 | BF041622 | ALKBH4    | 0.0510  | 0.8572 | 0.0678  | 0.7982 | 0.1442  | 0.5167 | -0.0488 | 0.8019 |
| OLIGO_11210 | BF041628 | RRAGC     | 0.3341  | 0.3261 | -0.3170 | 0.3191 | -0.0298 | 0.9108 | 0.3260  | 0.1628 |
| OLIGO_09232 | BF041631 | ZNHIT1    | -0.4727 | 0.1089 | 0.5544  | 0.0445 | -0.0736 | 0.7496 | -0.0836 | 0.6791 |
| OLIGO_04550 | BF041635 | MGC40499  | 0.6291  | 0.1047 | -0.0287 | 0.9359 | -0.6880 | 0.0261 | -0.2586 | 0.3272 |
| OLIGO_08706 | BF041636 | SLC7A4    | 0.7406  | 0.1778 | -0.6661 | 0.1950 | 0.7169  | 0.0961 | 1.0436  | 0.0058 |
| OLIGO_04551 | BF041637 | GNPAT     | -0.7825 | 0.2676 | -0.2332 | 0.6986 | 1.0709  | 0.2191 | 0.2160  | 0.6911 |
| OLIGO_04549 | BF041642 | OTUD5     | 0.3415  | 0.1668 | -0.2768 | 0.2291 | 0.0354  | 0.8555 | 0.0463  | 0.7849 |
| OLIGO_07898 | BF041643 | JARID1B   | 0.4744  | 0.1923 | -0.8147 | 0.0161 | 0.3115  | 0.2809 | 0.2942  | 0.2382 |
| OLIGO_04547 | BF041658 | CHMP5     | 0.1733  | 0.7045 | -0.8715 | 0.0407 | -0.1891 | 0.6017 | -0.0463 | 0.8827 |
| OLIGO_08697 | BF041669 | LOC511319 | 0.0974  | 0.7342 | 0.4839  | 0.0717 | -0.2319 | 0.3063 | -0.2280 | 0.2478 |
| OLIGO_05042 | BF041675 | CASD1     | 0.7378  | 0.1824 | -0.9397 | 0.0696 | 0.7349  | 0.0909 | 0.7987  | 0.0378 |
| OLIGO_11630 | BF041679 | LOC285636 | -0.3953 | 0.4747 | 0.4183  | 0.4188 | 0.0120  | 0.9779 | -0.0654 | 0.8631 |
| OLIGO_09497 | BF041680 | LOC57228  | 0.3479  | 0.1830 | -0.8405 | 0.0006 | 0.2423  | 0.2410 | 0.0291  | 0.8712 |
| OLIGO_05044 | BF041683 | APIG1     | -0.0390 | 0.9150 | 0.0038  | 0.9911 | -0.2928 | 0.3065 | 0.0082  | 0.9739 |
| OLIGO_09492 | BF041698 | ANXA11    | 1.5168  | 0.0093 | -1.0983 | 0.0436 | 0.1821  | 0.6892 | 0.0355  | 0.9290 |
| OLIGO_04972 | BF041705 | LOC651760 | -0.2241 | 0.6023 | 0.5311  | 0.1954 | 0.5058  | 0.1164 | -0.1543 | 0.5877 |
| OLIGO_04976 | BF041716 | IL21R     | 0.0119  | 0.9680 | 0.1049  | 0.7037 | 0.0091  | 0.9690 | -0.1134 | 0.5780 |
| OLIGO_06452 | BF041720 | TINAGL1   | -0.6383 | 0.2050 | 0.1490  | 0.7499 | -0.0996 | 0.7977 | -0.3892 | 0.2513 |
| OLIGO_06450 | BF041721 | SOSTDC1   | 0.1642  | 0.7885 | -0.4386 | 0.4735 | 0.3642  | 0.5391 | 0.5068  | 0.4184 |
| OLIGO_06454 | BF041724 | LOC525506 | 0.0659  | 0.8864 | 0.0145  | 0.9732 | -0.8025 | 0.0268 | -0.5496 | 0.0828 |
| OLIGO_06439 | BF041729 | CRIP1     | 0.8002  | 0.0196 | -0.2965 | 0.3540 | -1.1291 | 0.0000 | -0.8577 | 0.0003 |
| OLIGO_06474 | BF041732 | SLC4A9    | 0.9315  | 0.1004 | -0.5138 | 0.3169 | 0.8146  | 0.0349 | 0.5320  | 0.1150 |
| OLIGO_08261 | BF041736 | Pafah1b2  | -0.5548 | 0.2432 | 0.0482  | 0.9137 | -0.7816 | 0.0364 | -0.5245 | 0.1084 |
| OLIGO_06473 | BF041738 | CUL2      | 0.3391  | 0.4965 | -0.9480 | 0.0421 | 0.5373  | 0.1658 | 0.3823  | 0.2600 |
| OLIGO_11243 | BF041741 | DRCTNNB1A | 0.3716  | 0.3932 | -0.1633 | 0.6880 | 0.2255  | 0.5118 | 0.0473  | 0.8803 |
| OLIGO_06416 | BF041744 | P15RS     | 0.4050  | 0.1155 | -0.4931 | 0.0403 | -0.1887 | 0.3514 | 0.0307  | 0.8620 |
| OLIGO_07272 | BF041753 | HSPD1     | 0.3139  | 0.3752 | -0.6412 | 0.0524 | -0.3676 | 0.1892 | -0.5961 | 0.0158 |
| OLIGO_10431 | BF041759 | PPP1R15A  | -0.4005 | 0.3310 | 0.2111  | 0.5820 | -0.4573 | 0.1604 | -0.4090 | 0.1490 |
| OLIGO_04078 | BF041763 | HEYL      | -0.7627 | 0.0873 | 0.2922  | 0.4571 | 0.9048  | 0.0544 | 0.7343  | 0.0990 |
| OLIGO_06457 | BF041764 | DEDD2     | -0.1348 | 0.6759 | 0.2298  | 0.4484 | 0.2784  | 0.2718 | 0.0424  | 0.8481 |
| OLIGO_08892 | BF041765 | GAL3ST1   | -0.4997 | 0.3521 | 0.8667  | 0.1203 | 0.3620  | 0.4416 | 0.1427  | 0.7350 |

|             |          |                   |         |        |         |        |         |        |         |        |
|-------------|----------|-------------------|---------|--------|---------|--------|---------|--------|---------|--------|
| OLIGO_06476 | BF041770 | CD68              | -0.4068 | 0.4002 | 0.1332  | 0.7627 | 0.8508  | 0.0301 | 0.6078  | 0.0786 |
| OLIGO_08782 | BF041775 | GTL3              | -0.4006 | 0.2506 | 0.4070  | 0.2304 | -0.5520 | 0.1108 | -0.6457 | 0.0697 |
| OLIGO_04554 | BF041780 | ABHD13            | 0.7101  | 0.1284 | -0.6205 | 0.1554 | -0.2964 | 0.4177 | -0.3492 | 0.2755 |
| OLIGO_04077 | BF041787 | PPWD1             | 0.2200  | 0.4924 | -0.5021 | 0.0938 | 0.1220  | 0.6295 | 0.1383  | 0.5348 |
| OLIGO_06434 | BF041789 | SPTLC2            | 0.8041  | 0.0005 | -0.7657 | 0.0003 | 0.2061  | 0.2562 | 0.0795  | 0.6118 |
| OLIGO_06433 | BF041790 | GALNT1            | 0.5932  | 0.0887 | -1.0359 | 0.0016 | -0.0521 | 0.8484 | -0.2110 | 0.3771 |
| OLIGO_04475 | BF041798 | LAMA4             | -0.4370 | 0.1461 | 0.1798  | 0.5215 | 1.0673  | 0.0000 | 0.7075  | 0.0007 |
| OLIGO_04464 | BF041803 | CHST7             | -0.8051 | 0.2029 | 0.6963  | 0.2393 | 0.7020  | 0.1499 | 0.6499  | 0.1251 |
| OLIGO_11448 | BF041804 | PEPD              | 0.5403  | 0.1033 | -0.9233 | 0.0029 | 0.9129  | 0.0005 | 0.8294  | 0.0004 |
| OLIGO_04465 | BF041812 | PLA2G4B           | 0.4347  | 0.4470 | 0.0895  | 0.8650 | -0.4651 | 0.2481 | -0.2917 | 0.4077 |
| OLIGO_04468 | BF041814 | XLKD1             | -0.6431 | 0.3543 | 0.4086  | 0.5305 | 1.1989  | 0.1240 | 1.6240  | 0.0800 |
| OLIGO_04477 | BF041820 | TNNI3             | 1.4133  | 0.0029 | -1.8615 | 0.0000 | 0.8291  | 0.0274 | 0.4922  | 0.1272 |
| OLIGO_01271 | BF041822 | AKAP9             | 0.3703  | 0.4426 | -0.1727 | 0.7018 | 0.1297  | 0.7314 | -0.0067 | 0.9839 |
| OLIGO_04473 | BF041825 | ASB2              | 0.3783  | 0.4710 | -0.6080 | 0.2157 | 0.2377  | 0.5632 | 0.0075  | 0.9833 |
| OLIGO_04463 | BF041832 | ENPP4             | 0.7596  | 0.1328 | -1.1070 | 0.0201 | 1.0306  | 0.0095 | 1.0483  | 0.0029 |
| OLIGO_04471 | BF041833 | SCUBE1            | -0.3794 | 0.3280 | 0.1162  | 0.7455 | 0.9395  | 0.0020 | 0.5325  | 0.0418 |
| OLIGO_04470 | BF041835 | C8orf4            | 0.1216  | 0.7835 | 0.2846  | 0.5112 | 0.1032  | 0.7120 | 0.4582  | 0.0619 |
| OLIGO_04472 | BF041839 | TLN2              | -0.0687 | 0.7877 | -0.0330 | 0.8896 | 1.0076  | 0.0000 | 0.7630  | 0.0000 |
| OLIGO_09460 | BF041841 | LOC505009         | -0.4932 | 0.1110 | 0.8011  | 0.0058 | 0.6855  | 0.0049 | 0.0370  | 0.8636 |
| OLIGO_11780 | BF041846 | PPRC1             | 0.4608  | 0.2614 | -0.7538 | 0.0498 | -0.3226 | 0.3157 | -0.1425 | 0.6125 |
| OLIGO_04971 | BF041847 | SRCAP             | 0.0197  | 0.9462 | -0.3743 | 0.1743 | 0.0196  | 0.9298 | 0.0315  | 0.8712 |
| OLIGO_04970 | BF041852 | PIP5K3            | 0.2505  | 0.5963 | -0.4723 | 0.2858 | -0.1898 | 0.6085 | -0.0274 | 0.9326 |
| OLIGO_04973 | BF041860 | MTHFD1L           | 1.0410  | 0.0237 | -2.0584 | 0.0000 | -0.9606 | 0.0080 | -0.3255 | 0.3017 |
| OLIGO_04974 | BF041861 | DKFZp586C072<br>1 | -0.1493 | 0.7149 | -0.0458 | 0.9044 | 0.4396  | 0.1720 | 0.8973  | 0.0015 |
| OLIGO_11118 | BF041863 | LOC618652         | -0.4422 | 0.7179 | 0.9739  | 0.3975 | 0.3554  | 0.7456 | 1.6382  | 0.0772 |
| OLIGO_04967 | BF041867 | HSPB7             | -0.6951 | 0.3936 | 0.0333  | 0.9653 | -0.0073 | 0.9908 | -0.4454 | 0.4266 |
| OLIGO_09459 | BF041872 | ELMO2             | 0.1643  | 0.5621 | -0.0219 | 0.9332 | 0.4518  | 0.0425 | 0.5634  | 0.0037 |
| OLIGO_10632 | BF041873 | PSMA5             | -0.0924 | 0.7674 | -0.2811 | 0.3855 | -0.6484 | 0.1662 | -0.7595 | 0.1658 |
| OLIGO_04969 | BF041876 | TMEM11            | 0.4280  | 0.3238 | 0.0374  | 0.9259 | -0.2040 | 0.5583 | -0.1922 | 0.5189 |
| OLIGO_04968 | BF041881 | POLD4             | -0.8084 | 0.0257 | 1.0119  | 0.0028 | -0.4566 | 0.1098 | -0.7096 | 0.0045 |
| OLIGO_07854 | BF041885 | NDUFA12           | 0.5442  | 0.2307 | -0.8305 | 0.0836 | -0.6557 | 0.1480 | -0.6768 | 0.1382 |
| OLIGO_04977 | BF041888 | TMEM85            | 0.4261  | 0.1140 | -0.3648 | 0.1455 | 0.5239  | 0.0143 | 0.4868  | 0.0088 |
| OLIGO_04978 | BF041889 | RAB11FIP5         | -0.5725 | 0.0696 | 0.9914  | 0.0008 | 0.6368  | 0.0110 | 0.3882  | 0.0734 |

|             |          |           |         |        |         |        |         |        |         |        |
|-------------|----------|-----------|---------|--------|---------|--------|---------|--------|---------|--------|
| OLIGO_02695 | BF041896 | CPSF3     | 0.0341  | 0.9552 | -0.0959 | 0.8660 | -0.3812 | 0.4242 | -0.3000 | 0.4767 |
| OLIGO_10642 | BF041903 | POLR2G    | -0.2607 | 0.5682 | 0.0906  | 0.8321 | 0.0043  | 0.9905 | -0.1315 | 0.6748 |
| OLIGO_04082 | BF041910 | XPO6      | 0.5183  | 0.2805 | -0.4255 | 0.3397 | -0.2355 | 0.5281 | -0.2152 | 0.5104 |
| OLIGO_06485 | BF041917 | SEC24B    | -0.6250 | 0.2096 | 0.5755  | 0.2166 | 0.7430  | 0.0573 | 0.4707  | 0.1685 |
| OLIGO_06492 | BF041921 | RTN4RL2   | 0.3979  | 0.3543 | -0.4050 | 0.3164 | -0.0919 | 0.7848 | -0.2110 | 0.4738 |
| OLIGO_06487 | BF041931 | CHST6     | -0.2314 | 0.7383 | -0.4181 | 0.5187 | 0.6202  | 0.2544 | 0.3509  | 0.4654 |
| OLIGO_01808 | BF041933 | TRPM4     | 0.3607  | 0.3421 | -0.4648 | 0.2248 | 0.0323  | 0.9190 | 0.0609  | 0.8405 |
| OLIGO_08904 | BF041938 | APIP      | 0.0940  | 0.7756 | -1.2083 | 0.0001 | -0.3179 | 0.2190 | -0.1368 | 0.5454 |
| OLIGO_08248 | BF041939 | MRPL43    | 0.5118  | 0.1524 | -0.3095 | 0.3536 | -0.4921 | 0.0818 | -0.7081 | 0.0056 |
| OLIGO_06503 | BF041943 | STOML3    | 0.2227  | 0.8418 | -0.5029 | 0.6386 | 1.3199  | 0.2076 | 0.6693  | 0.4873 |
| OLIGO_04081 | BF041945 | TSC22D2   | 0.3085  | 0.7247 | 0.0249  | 0.9758 | -0.9977 | 0.1466 | -0.7348 | 0.2218 |
| OLIGO_04080 | BF041946 | IFIT2     | 1.0068  | 0.0996 | -0.4166 | 0.4316 | -1.0991 | 0.0105 | -0.6076 | 0.1066 |
| OLIGO_09624 | BF041958 | PTPN6     | -0.7345 | 0.0484 | 1.0984  | 0.0017 | -0.0903 | 0.7562 | -0.1778 | 0.4852 |
| OLIGO_04479 | BF041963 | ZNF507    | 0.5681  | 0.1646 | -0.2967 | 0.4374 | -0.3270 | 0.3071 | 0.1344  | 0.6314 |
| OLIGO_05123 | BF041965 | LSS       | -0.2639 | 0.6099 | 0.8967  | 0.0642 | -0.0865 | 0.8330 | -0.4162 | 0.2415 |
| OLIGO_09195 | BF041972 | MRPS17    | 0.6587  | 0.2357 | -0.7871 | 0.1577 | -0.0766 | 0.8724 | -0.4905 | 0.3220 |
| OLIGO_07409 | BF041978 | ZNF38     | 0.7711  | 0.0961 | -0.2485 | 0.5269 | -0.4348 | 0.2796 | -0.1094 | 0.7512 |
| OLIGO_04390 | BF041981 | LOC513412 | -0.2097 | 0.6270 | -0.4819 | 0.2329 | 0.5384  | 0.1126 | 0.4332  | 0.1485 |
| OLIGO_04476 | BF041987 | LGTN      | -0.2510 | 0.6467 | 0.1322  | 0.8039 | 0.5733  | 0.2791 | 0.2653  | 0.5992 |
| OLIGO_04422 | BF041996 | C7orf26   | -0.0943 | 0.8368 | 0.4125  | 0.3722 | 0.4134  | 0.3560 | 0.6028  | 0.2335 |
| OLIGO_04421 | BF041997 | RCOR3     | -0.2314 | 0.7092 | -0.9475 | 0.1544 | 0.2614  | 0.6163 | 0.6077  | 0.3289 |
| OLIGO_04914 | BF042008 | FLJ12886  | 0.6818  | 0.1572 | 0.1307  | 0.7472 | 0.4427  | 0.3165 | 0.2723  | 0.4940 |
| OLIGO_09435 | BF042009 | VBP1      | 1.0813  | 0.0002 | -1.5110 | 0.0000 | -0.4739 | 0.0362 | -0.2367 | 0.2283 |
| OLIGO_06608 | BF042010 | FDXR      | 0.4655  | 0.2373 | -0.7056 | 0.0557 | -0.4446 | 0.1502 | -0.3672 | 0.1761 |
| OLIGO_04913 | BF042011 | C10orf42  | -0.1166 | 0.8219 | 0.0805  | 0.8679 | 0.8477  | 0.0373 | 0.1505  | 0.6732 |
| OLIGO_04910 | BF042017 | HBS1L     | 0.6465  | 0.0548 | -0.5828 | 0.0641 | -0.4144 | 0.1160 | -0.0393 | 0.8647 |
| OLIGO_04918 | BF042026 | CHCHD8    | 0.5149  | 0.2284 | -0.5134 | 0.2017 | 0.4202  | 0.2095 | 0.1521  | 0.6037 |
| OLIGO_04919 | BF042027 | WDFY3     | 0.0627  | 0.8652 | -0.1214 | 0.7337 | 0.3376  | 0.3777 | 0.2061  | 0.5544 |
| OLIGO_04916 | BF042031 | LOC653870 | -0.0244 | 0.9560 | -0.2318 | 0.5723 | 0.8075  | 0.0238 | 0.3153  | 0.3037 |
| OLIGO_09750 | BF042032 | EFTUD2    | 0.2196  | 0.5574 | 0.4284  | 0.2213 | 0.2244  | 0.4442 | 0.0876  | 0.7330 |
| OLIGO_06551 | BF042034 | ZMAT2     | 0.0142  | 0.9410 | -0.2510 | 0.1617 | -0.3224 | 0.0336 | -0.2342 | 0.0766 |
| OLIGO_07127 | BF042039 | HSPA14    | 0.1189  | 0.6904 | -0.2342 | 0.4274 | -0.1833 | 0.5097 | -0.1869 | 0.4867 |
| OLIGO_04908 | BF042040 | KPNA1     | 0.8338  | 0.0567 | -0.2763 | 0.4987 | 0.0460  | 0.8930 | 0.2939  | 0.3267 |
| OLIGO_02544 | BF042048 | Mcl1      | 0.2060  | 0.6566 | -0.6266 | 0.1485 | -0.4683 | 0.1974 | -0.3620 | 0.2550 |

|             |          |          |         |        |         |        |         |        |         |        |
|-------------|----------|----------|---------|--------|---------|--------|---------|--------|---------|--------|
| OLIGO_06764 | BF042062 | SLC40A1  | -0.5590 | 0.3424 | -0.1449 | 0.7917 | 1.9405  | 0.0000 | 2.0119  | 0.0000 |
| OLIGO_04912 | BF042063 | ABCC6    | 0.1223  | 0.8277 | 0.0895  | 0.8647 | 0.4007  | 0.3685 | 0.1869  | 0.6363 |
| OLIGO_08947 | BF042069 | TMEM103  | 0.5063  | 0.2277 | -0.4721 | 0.2444 | 0.0694  | 0.8483 | -0.0767 | 0.8244 |
| OLIGO_04423 | BF042073 | RHPN2    | 1.0029  | 0.0045 | -1.0042 | 0.0024 | 0.7049  | 0.0106 | 0.8747  | 0.0003 |
| OLIGO_09081 | BF042074 | LIPE     | -0.9930 | 0.0677 | 1.5921  | 0.0018 | 1.3640  | 0.0016 | 1.3374  | 0.0004 |
| OLIGO_08154 | BF042079 | TCEB1    | 0.9516  | 0.0061 | -1.1199 | 0.0006 | -0.3833 | 0.1574 | -0.3867 | 0.1045 |
| OLIGO_04413 | BF042089 | BCKDHA   | -0.0952 | 0.8120 | -0.4385 | 0.2469 | 0.3935  | 0.2120 | 0.1185  | 0.6665 |
| OLIGO_11734 | BF042092 | RPP30    | 0.8537  | 0.0176 | -0.8004 | 0.0173 | -0.5124 | 0.0687 | -0.2337 | 0.3422 |
| OLIGO_09148 | BF042096 | FAM44B   | -0.0186 | 0.9490 | 0.0430  | 0.8739 | 0.2346  | 0.3022 | -0.0423 | 0.8315 |
| OLIGO_04416 | BF042105 | ARHGEF5  | -0.1092 | 0.7545 | 0.2772  | 0.3963 | 0.7621  | 0.0056 | 0.5856  | 0.0149 |
| OLIGO_08977 | BF042119 | TRAPPC6A | -0.1779 | 0.7368 | -0.0055 | 0.9912 | 0.1190  | 0.7743 | -0.0076 | 0.9832 |
| OLIGO_09399 | BF042121 | TMEM142A | 1.7669  | 0.0664 | -1.2048 | 0.1899 | -0.7046 | 0.4268 | -0.4029 | 0.6362 |
| OLIGO_04836 | BF042122 | EFNA5    | -1.4282 | 0.0524 | 0.7662  | 0.2601 | 2.5511  | 0.0000 | 2.1922  | 0.0000 |
| OLIGO_09900 | BF042129 | PPP2R5A  | 0.1190  | 0.7129 | 0.3366  | 0.2660 | -0.6247 | 0.0141 | -0.3775 | 0.0895 |
| OLIGO_11590 | BF042130 | CS       | -0.9067 | 0.1237 | 0.9955  | 0.0708 | -0.4992 | 0.2855 | -0.3760 | 0.3540 |
| OLIGO_04917 | BF042131 | RAC2     | 0.3785  | 0.5270 | 0.4857  | 0.3833 | -1.2040 | 0.0113 | -1.4471 | 0.0005 |
| OLIGO_04915 | BF042133 | FAM57A   | -0.1764 | 0.5224 | 0.0440  | 0.8646 | 0.0670  | 0.7566 | -0.0611 | 0.7466 |
| OLIGO_06802 | BF042135 | STMN1    | -1.0553 | 0.0473 | 1.5360  | 0.0021 | -2.0986 | 0.0000 | -1.9863 | 0.0000 |
| OLIGO_07549 | BF042143 | MAPBPIP  | 0.1093  | 0.7385 | -0.3890 | 0.2068 | 0.4428  | 0.0847 | 0.3911  | 0.0819 |
| OLIGO_04920 | BF042144 | TBRG1    | 0.8226  | 0.1844 | -0.5682 | 0.3294 | -0.2152 | 0.6573 | -0.0709 | 0.8674 |
| OLIGO_06510 | BF042147 | RY1      | 0.4958  | 0.2445 | -0.7743 | 0.0523 | -0.1834 | 0.5869 | -0.1797 | 0.5485 |
| OLIGO_08869 | BF042150 | SLC16A7  | 0.7064  | 0.1939 | -0.5196 | 0.3157 | 0.0573  | 0.8873 | -0.0418 | 0.9061 |
| OLIGO_04063 | BF042163 | SCAMP4   | 0.0485  | 0.8717 | 0.3121  | 0.2643 | -0.1028 | 0.6657 | -0.1170 | 0.5708 |
| OLIGO_08874 | BF042165 | PDCD8    | 0.2040  | 0.6462 | -0.5766 | 0.1659 | 0.2814  | 0.4194 | -0.2710 | 0.3744 |
| OLIGO_11164 | BF042169 | TEAD2    | -0.4644 | 0.2016 | 0.3390  | 0.3152 | 0.0573  | 0.8422 | -0.1599 | 0.5213 |
| OLIGO_12800 | BF042170 | IGSF4    | 0.0007  | 0.9990 | -0.0527 | 0.9254 | -0.4943 | 0.3727 | -0.5450 | 0.3121 |
| OLIGO_04060 | BF042172 | NCOR1    | -0.2919 | 0.4107 | 0.5296  | 0.1073 | 0.2798  | 0.3072 | 0.2917  | 0.2300 |
| OLIGO_07809 | BF042174 | PARK7    | -0.0716 | 0.8133 | 0.1307  | 0.6448 | -0.2253 | 0.3431 | -0.2880 | 0.1666 |
| OLIGO_06382 | BF042175 | SERPINI1 | -0.1053 | 0.8009 | 0.3082  | 0.4275 | -1.3476 | 0.0001 | -1.0071 | 0.0005 |
| OLIGO_06413 | BF042178 | SMOX     | 0.0081  | 0.9923 | -1.0427 | 0.1375 | 2.2216  | 0.0001 | 2.4838  | 0.0000 |
| OLIGO_06410 | BF042179 | TRPM6    | -0.4647 | 0.5535 | 0.6458  | 0.3768 | 2.9078  | 0.0000 | 2.5415  | 0.0000 |
| OLIGO_08870 | BF042181 | HAGH     | -1.8180 | 0.0001 | 1.7584  | 0.0000 | -0.0452 | 0.8987 | -0.1643 | 0.5970 |
| OLIGO_08888 | BF042183 | SNX3     | 0.8045  | 0.0078 | -0.9547 | 0.0008 | 0.0573  | 0.8081 | -0.1899 | 0.3585 |
| OLIGO_04424 | BF042188 | CHD7     | -0.4184 | 0.2333 | 0.1300  | 0.6901 | 0.6192  | 0.0246 | 0.2993  | 0.2106 |

|             |          |           |         |        |         |        |         |        |         |        |
|-------------|----------|-----------|---------|--------|---------|--------|---------|--------|---------|--------|
| OLIGO_02972 | BF042189 | GLT25D1   | -0.0868 | 0.7032 | 0.4118  | 0.0530 | -0.1672 | 0.3531 | -0.3414 | 0.0298 |
| OLIGO_04419 | BF042192 | PLA2G12B  | 0.0395  | 0.9385 | 0.0266  | 0.9538 | 0.3295  | 0.3865 | 0.0812  | 0.8072 |
| OLIGO_04417 | BF042198 | MGC52057  | 0.2765  | 0.3486 | 0.2918  | 0.2885 | -0.3320 | 0.1543 | -0.1254 | 0.5361 |
| OLIGO_09150 | BF042200 | LOC541219 | -0.0402 | 0.9426 | -0.0356 | 0.9456 | -0.4348 | 0.3203 | 0.0356  | 0.9260 |
| OLIGO_07832 | BF042202 | SEMA4B    | 0.5426  | 0.1829 | -0.1911 | 0.6157 | -0.2797 | 0.3808 | -0.4516 | 0.1063 |
| OLIGO_10883 | BF042206 | LRDD      | -0.4516 | 0.4567 | 0.2917  | 0.6071 | -0.8704 | 0.0676 | -0.8238 | 0.0483 |
| OLIGO_09396 | BF042207 | MAP2K1    | 0.1519  | 0.6818 | 0.6111  | 0.0767 | -0.9266 | 0.0017 | -1.1325 | 0.0000 |
| OLIGO_07999 | BF042208 | SLC1A3    | 1.9260  | 0.0021 | -1.3081 | 0.0254 | -2.0525 | 0.0000 | -1.7461 | 0.0001 |
| OLIGO_04839 | BF042209 | CIZ1      | -0.5575 | 0.0431 | 0.3240  | 0.2076 | 0.2319  | 0.2834 | 0.1969  | 0.2973 |
| OLIGO_04838 | BF042210 | TACC1     | 0.6957  | 0.2571 | -0.2872 | 0.6165 | 0.1338  | 0.8045 | 0.4722  | 0.3784 |
| OLIGO_11578 | BF042216 | MCART1    | -0.3962 | 0.6057 | 0.1606  | 0.8201 | 0.7207  | 0.2241 | 0.4930  | 0.3480 |
| OLIGO_04846 | BF042217 | C7orf28A  | -0.3293 | 0.3057 | -0.3480 | 0.2446 | -0.3572 | 0.1618 | -0.2020 | 0.3727 |
| OLIGO_09255 | BF042220 | SNRPA     | -0.5167 | 0.3703 | 0.1152  | 0.8281 | -0.1049 | 0.8090 | -0.3586 | 0.3453 |
| OLIGO_04844 | BF042221 | ZNF664    | -1.2562 | 0.0011 | 1.6134  | 0.0000 | -0.4703 | 0.1177 | -0.2634 | 0.3159 |
| OLIGO_09301 | BF042227 | APBA3     | -0.2186 | 0.5325 | 0.8724  | 0.0079 | 0.8899  | 0.0013 | 0.5473  | 0.0231 |
| OLIGO_10904 | BF042233 | TBC1D4    | 0.8596  | 0.0579 | -1.6530 | 0.0001 | 0.3071  | 0.3894 | 0.8397  | 0.0072 |
| OLIGO_04833 | BF042236 | ARFGEF1   | 0.7524  | 0.0627 | -0.7005 | 0.0640 | 0.1040  | 0.7421 | 0.0441  | 0.8734 |
| OLIGO_04837 | BF042240 | SNX27     | -0.3517 | 0.2939 | 0.4778  | 0.1157 | 0.2492  | 0.3208 | 0.1042  | 0.6304 |
| OLIGO_07698 | BF042244 | TMEM60    | 0.7439  | 0.0297 | -0.4555 | 0.1539 | -0.9749 | 0.0003 | -0.8386 | 0.0004 |
| OLIGO_07000 | BF042245 | ZNF598    | 0.7869  | 0.2835 | 0.1524  | 0.8329 | 1.2910  | 0.0072 | 1.1651  | 0.0056 |
| OLIGO_04058 | BF042251 | AMACR     | 0.6236  | 0.1522 | -0.5419 | 0.1833 | -0.0794 | 0.8159 | 0.1872  | 0.5305 |
| OLIGO_04062 | BF042255 | DNAJB1    | -0.2665 | 0.6250 | -0.2980 | 0.5741 | 0.3238  | 0.5287 | -0.1298 | 0.7921 |
| OLIGO_04061 | BF042266 | GGA1      | 0.4905  | 0.2514 | -0.4037 | 0.3127 | -0.3806 | 0.2561 | -0.4956 | 0.0915 |
| OLIGO_04056 | BF042273 | AOX2      | 0.8387  | 0.2498 | -0.4544 | 0.5072 | -1.2340 | 0.0310 | -0.6910 | 0.1669 |
| OLIGO_06594 | BF042283 | RWDD1     | 0.1437  | 0.6864 | -1.1747 | 0.0005 | -0.5456 | 0.0517 | -0.1258 | 0.6067 |
| OLIGO_08796 | BF042287 | LOC536377 | -0.5186 | 0.1814 | 0.6855  | 0.0592 | 0.2384  | 0.4326 | 0.3786  | 0.1550 |
| OLIGO_08797 | BF042289 | HMX2      | 0.5282  | 0.1231 | 0.3324  | 0.2952 | -0.3236 | 0.2343 | -0.1692 | 0.4822 |
| OLIGO_04028 | BF042291 | Mfhas1    | -0.4260 | 0.5966 | 1.5612  | 0.0397 | -1.7095 | 0.0069 | -1.9873 | 0.0004 |
| OLIGO_08792 | BF042292 | DNAJC1    | 0.5120  | 0.1366 | -0.5336 | 0.0953 | 0.8884  | 0.0012 | 0.7011  | 0.0032 |
| OLIGO_11637 | BF042308 | NUP85     | 0.2236  | 0.4426 | 0.1321  | 0.6258 | -0.3477 | 0.1314 | -0.2326 | 0.2451 |
| OLIGO_10917 | BF042311 | ATP1A1    | -0.0691 | 0.8255 | -0.2814 | 0.3375 | -0.8906 | 0.0003 | -0.9200 | 0.0000 |
| OLIGO_04348 | BF042312 | CAMKK1    | 0.5270  | 0.1798 | -0.1370 | 0.7090 | -0.5104 | 0.0982 | -0.6778 | 0.0131 |
| OLIGO_04346 | BF042319 | C1orf124  | -0.3083 | 0.5299 | 0.2858  | 0.5334 | -0.4833 | 0.2101 | -0.1835 | 0.5899 |
| OLIGO_04345 | BF042320 | ATHL1     | 0.1446  | 0.6984 | 0.2167  | 0.5345 | -0.7179 | 0.0144 | -0.2879 | 0.2610 |

|             |          |           |         |        |         |        |         |        |         |        |
|-------------|----------|-----------|---------|--------|---------|--------|---------|--------|---------|--------|
| OLIGO_04339 | BF042327 | NRK       | -0.2979 | 0.6110 | 1.0047  | 0.0674 | 1.8599  | 0.0001 | 2.5174  | 0.0000 |
| OLIGO_04340 | BF042333 | TMCO3     | -0.6685 | 0.2970 | -0.0017 | 0.9978 | -0.0832 | 0.8684 | -0.0036 | 0.9935 |
| OLIGO_04349 | BF042334 | RPS6KC1   | 0.0073  | 0.9745 | -0.3410 | 0.1076 | -0.1818 | 0.3197 | -0.0889 | 0.5699 |
| OLIGO_04343 | BF042337 | MAX       | 1.0030  | 0.0540 | -0.8624 | 0.0764 | 0.3412  | 0.4062 | 0.3244  | 0.3638 |
| OLIGO_11203 | BF042343 | NDUFA9    | 0.6082  | 0.2364 | -0.8390 | 0.0810 | -1.0679 | 0.0082 | -0.5784 | 0.1010 |
| OLIGO_04347 | BF042344 | TMEM30A   | 1.4600  | 0.0017 | -1.3713 | 0.0017 | -0.7697 | 0.0346 | -0.4777 | 0.1337 |
| OLIGO_04841 | BF042357 | FLJ90024  | -0.2804 | 0.7265 | 0.0499  | 0.9493 | 0.6474  | 0.4006 | 0.2465  | 0.7399 |
| OLIGO_04840 | BF042359 | PLAGL1    | -1.4819 | 0.0000 | 1.8814  | 0.0000 | -0.1818 | 0.5179 | -0.0372 | 0.8804 |
| OLIGO_09397 | BF042370 | AGPAT3    | -0.1081 | 0.7428 | 0.8583  | 0.0056 | -0.2568 | 0.3204 | -0.2858 | 0.2066 |
| OLIGO_04858 | BF042377 | SULT1C2   | -0.5352 | 0.0862 | 0.5082  | 0.0807 | 0.4233  | 0.0852 | 0.3415  | 0.1110 |
| OLIGO_07947 | BF042383 | TBCA      | 0.0007  | 0.9988 | -0.1791 | 0.6938 | -0.5670 | 0.2268 | -0.7501 | 0.1345 |
| OLIGO_04851 | BF042384 | CHST6     | 0.0353  | 0.9456 | -0.1033 | 0.8274 | 0.0813  | 0.8265 | 0.0630  | 0.8462 |
| OLIGO_09353 | BF042389 | ARHGDI3   | -0.4015 | 0.3442 | 0.7050  | 0.0753 | -0.2700 | 0.4200 | -0.5272 | 0.0712 |
| OLIGO_00839 | BF042401 | FLJ12118  | 0.2368  | 0.7453 | -0.0223 | 0.9739 | -1.2365 | 0.0308 | -0.9917 | 0.0478 |
| OLIGO_07464 | BF042405 | MGC16028  | -0.3185 | 0.3092 | 0.3376  | 0.2465 | 0.2180  | 0.3797 | -0.2138 | 0.3224 |
| OLIGO_04034 | BF042407 | FAM20B    | 0.6388  | 0.2345 | -0.1115 | 0.8254 | -0.8378 | 0.1125 | -0.2408 | 0.6119 |
| OLIGO_10910 | BF042413 | RBM18     | 0.3449  | 0.2470 | -0.5103 | 0.0657 | 0.0368  | 0.8762 | 0.2027  | 0.3217 |
| OLIGO_02718 | BF042414 | C7orf19   | 0.4501  | 0.2801 | 0.0965  | 0.7855 | 0.1816  | 0.6094 | 0.1224  | 0.7004 |
| OLIGO_04026 | BF042415 | DYM       | 0.7589  | 0.0219 | -0.5333 | 0.0846 | -0.2221 | 0.3906 | -0.0097 | 0.9659 |
| OLIGO_08790 | BF042420 | PHLDB1    | 0.2505  | 0.4675 | 0.2332  | 0.4695 | -0.8744 | 0.0013 | -0.6896 | 0.0037 |
| OLIGO_06356 | BF042427 | C9orf78   | -0.0750 | 0.8446 | 0.0191  | 0.9575 | 0.2828  | 0.3469 | 0.1790  | 0.5005 |
| OLIGO_08800 | BF042429 | EME1      | 0.3434  | 0.4824 | -0.7622 | 0.0959 | -0.3564 | 0.3524 | -0.6309 | 0.0604 |
| OLIGO_04030 | BF042441 | PLK3      | 0.4086  | 0.2875 | -0.6363 | 0.0769 | 0.6267  | 0.0400 | 0.3191  | 0.2379 |
| OLIGO_10848 | BF042446 | MS4A8B    | -0.0062 | 0.9894 | -0.7822 | 0.1358 | 0.2012  | 0.6290 | 0.2455  | 0.5539 |
| OLIGO_06687 | BF042451 | MGST3     | -1.0557 | 0.0112 | 1.1130  | 0.0043 | 0.6716  | 0.0394 | 0.2382  | 0.4045 |
| OLIGO_04029 | BF042459 | TFPI      | -0.2557 | 0.6737 | -0.6866 | 0.2258 | 1.7080  | 0.0004 | 1.3340  | 0.0015 |
| OLIGO_04033 | BF042461 | WDSUB1    | 0.0257  | 0.9599 | 0.3833  | 0.4474 | -0.2329 | 0.6309 | -0.0742 | 0.8731 |
| OLIGO_02548 | BF042462 | PAPSS1    | -0.5602 | 0.0346 | 0.4608  | 0.0611 | -0.2554 | 0.2239 | -0.2400 | 0.1917 |
| OLIGO_04032 | BF042464 | RASD1     | 0.3263  | 0.7580 | 0.0617  | 0.9526 | -0.1193 | 0.9061 | 0.3305  | 0.7374 |
| OLIGO_08791 | BF042465 | GRHL2     | 0.3515  | 0.4979 | -0.7289 | 0.1350 | 0.7098  | 0.0790 | 0.8785  | 0.0141 |
| OLIGO_08779 | BF042469 | LOC618450 | 0.3047  | 0.3074 | -0.1350 | 0.6284 | 0.1591  | 0.4963 | 0.1233  | 0.5468 |
| OLIGO_04355 | BF042472 | LOC650797 | -0.3276 | 0.5400 | 0.3580  | 0.4741 | 0.8332  | 0.0327 | 0.4770  | 0.1550 |
| OLIGO_09121 | BF042474 | RANBP3    | -0.3841 | 0.3750 | 1.2447  | 0.0022 | 0.4469  | 0.1880 | 0.4543  | 0.1265 |
| OLIGO_04360 | BF042475 | LRRFIP1   | 0.3512  | 0.5721 | -0.2271 | 0.6956 | -0.3765 | 0.4376 | -0.7540 | 0.0820 |

|             |          |          |         |        |         |        |         |        |         |        |
|-------------|----------|----------|---------|--------|---------|--------|---------|--------|---------|--------|
| OLIGO_04362 | BF042479 | RAB20    | -0.4614 | 0.1223 | 0.4847  | 0.0803 | 0.3688  | 0.1198 | 0.1678  | 0.4120 |
| OLIGO_04358 | BF042480 | KIAA0020 | -0.4007 | 0.2928 | 0.4676  | 0.1895 | 0.0079  | 0.9787 | 0.0308  | 0.9061 |
| OLIGO_04351 | BF042484 | KLF3     | 0.0178  | 0.9645 | -0.1500 | 0.6869 | -0.0898 | 0.7762 | -0.0183 | 0.9470 |
| OLIGO_09236 | BF042501 | CEACAM1  | -0.3773 | 0.4497 | 0.5848  | 0.2316 | 1.8245  | 0.0034 | 1.5922  | 0.0079 |
| OLIGO_04359 | BF042511 | ZCSL3    | 0.7135  | 0.0973 | -0.7389 | 0.0831 | -0.1892 | 0.5913 | -0.2511 | 0.4646 |
| OLIGO_03998 | BF042521 | VPS4A    | -0.0666 | 0.9378 | -0.2035 | 0.8042 | -1.6024 | 0.0917 | -0.9429 | 0.2505 |
| OLIGO_06882 | BF042525 | SPTBN1   | -1.4017 | 0.0054 | 1.1962  | 0.0107 | -1.2884 | 0.0013 | -0.9490 | 0.0062 |
| OLIGO_07789 | BF042526 | NDUFB9   | 0.6321  | 0.1078 | -0.9574 | 0.0094 | -0.2656 | 0.3922 | -0.4341 | 0.1082 |
| OLIGO_06933 | BF042534 | DUSP12   | 0.1684  | 0.5714 | -0.2490 | 0.3708 | -0.3105 | 0.1838 | -0.0276 | 0.8927 |
| OLIGO_04856 | BF042535 | HPS3     | 0.5226  | 0.3546 | -0.1014 | 0.8474 | 0.2560  | 0.5592 | -0.0699 | 0.8554 |
| OLIGO_04857 | BF042537 | GTF2B    | 0.4410  | 0.3196 | -0.3537 | 0.3924 | 1.2536  | 0.0004 | 1.4941  | 0.0000 |
| OLIGO_00643 | BF042538 | AP3D1    | -0.2805 | 0.5992 | 0.0745  | 0.8827 | 1.1540  | 0.0051 | 0.4764  | 0.1850 |
| OLIGO_08974 | BF042542 | SCP2     | 1.1146  | 0.0045 | -1.2048 | 0.0010 | 0.5530  | 0.0753 | 0.6309  | 0.0193 |
| OLIGO_04853 | BF042544 | ALS2CR19 | -0.1667 | 0.7031 | 0.1842  | 0.6586 | 0.5204  | 0.1089 | 0.4405  | 0.1211 |
| OLIGO_04855 | BF042545 | HMGA1    | 0.4560  | 0.3575 | -0.8555 | 0.0653 | -0.3590 | 0.3554 | -0.9409 | 0.0059 |
| OLIGO_04854 | BF042546 | KIAA0703 | -0.1519 | 0.7569 | 0.1418  | 0.7600 | 2.2237  | 0.0100 | 1.6979  | 0.0406 |
| OLIGO_09401 | BF042549 | DOT1L    | 0.7544  | 0.2764 | -0.2054 | 0.7541 | -0.1438 | 0.7909 | -0.2616 | 0.5817 |
| OLIGO_04848 | BF042552 | KIAA0157 | 0.0755  | 0.8840 | -0.3035 | 0.5267 | 0.2103  | 0.5889 | 0.1613  | 0.6359 |
| OLIGO_11580 | BF042556 | C2orf3   | 0.2821  | 0.7071 | -0.1445 | 0.8369 | 0.4624  | 0.4320 | 0.2483  | 0.6298 |
| OLIGO_09403 | BF042558 | NUBP2    | 0.4944  | 0.3246 | -0.5028 | 0.2841 | 0.1724  | 0.6613 | 0.0009  | 0.9978 |
| OLIGO_04777 | BF042572 | TESC     | -1.0707 | 0.0237 | 1.4246  | 0.0013 | 0.1027  | 0.7830 | -0.1560 | 0.6318 |
| OLIGO_04778 | BF042573 | DPF3     | 0.1260  | 0.6595 | -0.3170 | 0.2391 | 0.0122  | 0.9567 | 0.0073  | 0.9705 |
| OLIGO_04001 | BF042577 | IARS2    | 0.3856  | 0.2918 | -0.2295 | 0.5021 | -0.7253 | 0.0736 | -0.1820 | 0.5465 |
| OLIGO_06231 | BF042582 | ICMT     | 0.3950  | 0.3655 | -0.8362 | 0.0409 | 0.2381  | 0.4867 | -0.0277 | 0.9266 |
| OLIGO_02906 | BF042583 | PRKCBP1  | -0.4589 | 0.1788 | 0.1129  | 0.7217 | 0.3062  | 0.2571 | 0.2584  | 0.2702 |
| OLIGO_06230 | BF042585 | S100PBP  | -0.5807 | 0.1073 | 1.1400  | 0.0010 | 0.8910  | 0.0018 | 0.3802  | 0.1277 |
| OLIGO_06271 | BF042595 | PIGT     | -0.0150 | 0.9473 | 0.6105  | 0.0041 | 0.1926  | 0.2775 | 0.0673  | 0.6645 |
| OLIGO_06281 | BF042596 | CLSTN1   | 0.1162  | 0.8353 | -0.0170 | 0.9743 | 0.2622  | 0.5481 | 0.4545  | 0.2327 |
| OLIGO_04004 | BF042599 | ASXL1    | -0.6302 | 0.2792 | -0.2545 | 0.6411 | -0.4725 | 0.3717 | -0.1555 | 0.7494 |
| OLIGO_06254 | BF042604 | FLJ20294 | -0.2719 | 0.5491 | 0.1463  | 0.7300 | 0.2117  | 0.5481 | 0.0052  | 0.9867 |
| OLIGO_01583 | BF042605 | YIPF3    | 0.0242  | 0.9510 | -0.0946 | 0.7974 | 0.2064  | 0.5041 | -0.0821 | 0.7613 |
| OLIGO_04003 | BF042606 | LAMC1    | 0.0575  | 0.9213 | -0.0589 | 0.9138 | 0.4006  | 0.3799 | 0.3541  | 0.3753 |
| OLIGO_06256 | BF042608 | LIN7C    | 0.2218  | 0.5141 | -0.4398 | 0.1659 | 0.2943  | 0.2761 | 0.3713  | 0.1114 |
| OLIGO_06258 | BF042630 | KLHL3    | -0.2016 | 0.5811 | 0.6600  | 0.0539 | 0.2374  | 0.4072 | 0.0075  | 0.9761 |

|             |          |           |         |        |         |        |         |        |         |        |
|-------------|----------|-----------|---------|--------|---------|--------|---------|--------|---------|--------|
| OLIGO_06249 | BF042632 | MLXIPL    | 0.5310  | 0.2669 | 0.1861  | 0.6772 | 0.3964  | 0.2902 | 0.1696  | 0.6050 |
| OLIGO_08721 | BF042633 | UBE2L6    | 0.3197  | 0.7231 | -0.2988 | 0.7176 | 1.2251  | 0.2208 | 0.7859  | 0.3768 |
| OLIGO_11437 | BF042635 | HOXD9     | 0.1267  | 0.8467 | -0.0567 | 0.9263 | -0.5663 | 0.2708 | -0.4227 | 0.3477 |
| OLIGO_02588 | BF042641 | FAM62A    | -0.5818 | 0.0828 | 1.0890  | 0.0005 | -0.4608 | 0.0832 | -0.3705 | 0.1076 |
| OLIGO_06250 | BF042642 | FNTB      | 0.5816  | 0.0863 | -0.7583 | 0.0170 | 0.4401  | 0.0977 | 0.4165  | 0.0734 |
| OLIGO_08221 | BF042647 | GTF2IP1   | -1.0843 | 0.0626 | -0.1502 | 0.7824 | -0.3368 | 0.4609 | -0.1273 | 0.7541 |
| OLIGO_04357 | BF042657 | REST      | 0.4537  | 0.3643 | -0.5219 | 0.2646 | 0.0267  | 0.9457 | 0.4452  | 0.1947 |
| OLIGO_02168 | BF042659 | MECR      | 0.1595  | 0.7622 | -0.2131 | 0.6674 | 0.0127  | 0.9754 | -0.0860 | 0.8121 |
| OLIGO_10183 | BF042662 | TUFM      | 0.0176  | 0.9550 | -0.0968 | 0.7407 | -0.0112 | 0.9638 | -0.2219 | 0.3017 |
| OLIGO_09065 | BF042678 | SPINT2    | -0.7223 | 0.4276 | -0.1686 | 0.8437 | 3.5954  | 0.0000 | 2.5925  | 0.0000 |
| OLIGO_04283 | BF042682 | SMEK2     | 0.0871  | 0.8083 | 0.0913  | 0.7857 | 0.2494  | 0.3755 | 0.4912  | 0.0466 |
| OLIGO_04279 | BF042684 | RABGAP1L  | 0.2088  | 0.6381 | -0.1209 | 0.7798 | -0.1685 | 0.5522 | -0.1980 | 0.4238 |
| OLIGO_04280 | BF042685 | FLJ20152  | -0.5271 | 0.2205 | 0.8617  | 0.0320 | -0.9604 | 0.0053 | -0.7007 | 0.0188 |
| OLIGO_04272 | BF042688 | LOC647768 | 0.9517  | 0.0261 | -0.7453 | 0.0652 | -0.9412 | 0.0046 | -1.0320 | 0.0004 |
| OLIGO_04271 | BF042689 | RPUSD4    | -0.2252 | 0.5612 | -0.2623 | 0.4698 | 0.7176  | 0.0198 | 0.5451  | 0.0429 |
| OLIGO_08764 | BF042692 | PTPN3     | 1.2209  | 0.0040 | -0.9305 | 0.0183 | 1.3620  | 0.0001 | 1.1166  | 0.0001 |
| OLIGO_07815 | BF042702 | H2AFJ     | 0.0272  | 0.9552 | 0.7044  | 0.1203 | 1.3448  | 0.0004 | 1.2593  | 0.0002 |
| OLIGO_04776 | BF042710 | BCCIP     | 0.4114  | 0.2004 | -0.9091 | 0.0029 | 0.4240  | 0.0930 | 0.4979  | 0.0258 |
| OLIGO_07098 | BF042714 | TMED1     | -0.1565 | 0.6725 | 0.4494  | 0.1947 | -0.0938 | 0.7464 | -0.0546 | 0.8298 |
| OLIGO_02983 | BF042723 | ZNF609    | -0.1309 | 0.5714 | 0.2721  | 0.2070 | -0.2032 | 0.2664 | -0.1988 | 0.2117 |
| OLIGO_04769 | BF042724 | MTMR11    | 0.5500  | 0.2262 | -0.2923 | 0.4742 | 0.4881  | 0.2705 | 0.1822  | 0.6210 |
| OLIGO_04771 | BF042728 | CDCA4     | -0.0396 | 0.9033 | 0.2119  | 0.4867 | 0.2999  | 0.2406 | -0.0141 | 0.9498 |
| OLIGO_09365 | BF042732 | TGFBR1    | -0.2378 | 0.6481 | 0.2647  | 0.5830 | 1.0602  | 0.0086 | 1.3202  | 0.0002 |
| OLIGO_09369 | BF042740 | RAB22A    | -0.1129 | 0.7183 | 0.2605  | 0.3712 | 0.4533  | 0.0675 | 0.3611  | 0.0937 |
| OLIGO_04779 | BF042741 | CARHSP1   | -0.5255 | 0.2281 | 0.3924  | 0.3357 | 0.0125  | 0.9707 | 0.1162  | 0.6975 |
| OLIGO_04780 | BF042743 | MLL4      | -0.5701 | 0.1568 | 0.7117  | 0.0590 | 0.0750  | 0.8119 | 0.0216  | 0.9376 |
| OLIGO_04773 | BF042744 | HPCAL1    | 0.4815  | 0.2924 | -0.1496 | 0.7277 | 0.4792  | 0.1814 | 0.4209  | 0.1801 |
| OLIGO_04774 | BF042752 | UEV3      | 1.6181  | 0.0087 | -1.8759 | 0.0036 | -0.0283 | 0.9522 | 0.3127  | 0.4975 |
| OLIGO_06338 | BF042759 | RABGEF1   | -0.2205 | 0.4995 | 0.1607  | 0.5982 | 0.3258  | 0.2045 | 0.3811  | 0.0898 |
| OLIGO_06293 | BF042762 | NDUFS3    | 0.6045  | 0.0947 | -0.6577 | 0.0770 | 0.2819  | 0.3509 | 0.1152  | 0.6654 |
| OLIGO_06315 | BF042769 | PSMA1     | 0.9035  | 0.1106 | -0.9027 | 0.0883 | -0.3488 | 0.4314 | -0.3359 | 0.3867 |
| OLIGO_06303 | BF042776 | JMJD1B    | -0.7231 | 0.2111 | 0.6433  | 0.2340 | 0.0187  | 0.9633 | -0.2212 | 0.5338 |
| OLIGO_11201 | BF042779 | TRIM33    | 0.4300  | 0.3455 | -0.9712 | 0.0230 | 0.4591  | 0.1989 | 0.3747  | 0.2310 |
| OLIGO_07603 | BF042786 | MGC24381  | 0.6739  | 0.2436 | 0.0570  | 0.9168 | 1.0992  | 0.0190 | 0.5228  | 0.1901 |

|             |          |           |         |        |         |        |         |        |         |        |
|-------------|----------|-----------|---------|--------|---------|--------|---------|--------|---------|--------|
| OLIGO_04007 | BF042795 | RNF168    | 0.5712  | 0.0431 | -0.2386 | 0.3700 | -0.4137 | 0.0676 | -0.2762 | 0.1599 |
| OLIGO_06319 | BF042802 | SLC17A5   | 0.4712  | 0.4206 | -0.8301 | 0.1296 | 1.5418  | 0.0008 | 1.4749  | 0.0003 |
| OLIGO_04286 | BF042810 | L3MBTL    | 0.6827  | 0.0205 | -0.2187 | 0.4259 | 0.6620  | 0.0042 | 0.3486  | 0.0842 |
| OLIGO_04275 | BF042817 | NTHL1     | 0.0108  | 0.9808 | -0.1543 | 0.7140 | -0.9427 | 0.0078 | -1.0285 | 0.0009 |
| OLIGO_04277 | BF042818 | LOC504800 | 1.5108  | 0.0000 | -1.6302 | 0.0000 | 0.9632  | 0.0005 | 0.7920  | 0.0009 |
| OLIGO_04278 | BF042819 | ANKRD11   | 0.7616  | 0.0359 | -0.6392 | 0.0596 | -1.1715 | 0.0000 | -0.9793 | 0.0001 |
| OLIGO_04274 | BF042825 | UBPH      | 0.1672  | 0.5951 | -0.5382 | 0.0677 | -0.1018 | 0.6833 | 0.0723  | 0.7409 |
| OLIGO_04284 | BF042829 | MBD4      | 0.0201  | 0.9777 | -0.4246 | 0.5577 | 0.9359  | 0.1821 | 0.1987  | 0.7621 |
| OLIGO_04285 | BF042832 | NANS      | 0.5253  | 0.1153 | -1.1714 | 0.0002 | -0.1123 | 0.6670 | -0.2151 | 0.3469 |
| OLIGO_04281 | BF042837 | ELOVL2    | -0.4049 | 0.3370 | 0.0470  | 0.9043 | 0.1131  | 0.7328 | 0.3569  | 0.2156 |
| OLIGO_08273 | BF042838 | CCDC58    | 0.5246  | 0.1394 | -0.8933 | 0.0073 | -0.4571 | 0.1004 | -0.2329 | 0.3384 |
| OLIGO_04282 | BF042842 | HRSP12    | -0.1483 | 0.6785 | 0.0798  | 0.8114 | -0.3363 | 0.2311 | 0.0178  | 0.9425 |
| OLIGO_04268 | BF042845 | BACE1     | 0.4943  | 0.1362 | -0.2772 | 0.3675 | -0.6503 | 0.0119 | -0.7458 | 0.0010 |
| OLIGO_04269 | BF042847 | BAMBI     | -0.0067 | 0.9852 | 0.0778  | 0.8193 | 0.0594  | 0.8353 | -0.1550 | 0.5352 |
| OLIGO_09062 | BF042851 | NFIC      | -0.4992 | 0.3757 | 0.8729  | 0.0980 | -0.4139 | 0.3490 | -0.1763 | 0.6485 |
| OLIGO_08140 | BF042852 | RGMB      | 0.4283  | 0.2299 | -0.3908 | 0.2568 | -0.4227 | 0.2357 | -0.1794 | 0.5451 |
| OLIGO_09063 | BF042853 | YAF2      | 0.0778  | 0.8915 | -0.0493 | 0.9258 | 1.0998  | 0.0135 | 0.9110  | 0.0193 |
| OLIGO_00038 | BF042860 | RNF166    | -0.5845 | 0.1970 | 1.0842  | 0.0107 | 0.2147  | 0.5541 | -0.1159 | 0.7121 |
| OLIGO_11560 | BF042862 | HIF1A     | -0.3874 | 0.4175 | 0.0939  | 0.8335 | -1.0704 | 0.0044 | -0.4444 | 0.1755 |
| OLIGO_09254 | BF042864 | UBTD1     | 0.3196  | 0.6080 | -0.3028 | 0.6169 | 0.3216  | 0.5804 | 0.1623  | 0.7704 |
| OLIGO_09344 | BF042866 | C20orf23  | -0.2095 | 0.5427 | 0.2518  | 0.4333 | 0.5421  | 0.0458 | 0.5772  | 0.0150 |
| OLIGO_04727 | BF042874 | PIK3C2A   | 0.8149  | 0.0569 | -0.7913 | 0.0476 | 0.3747  | 0.2656 | 0.4741  | 0.1067 |
| OLIGO_01297 | BF042875 | IGBP1     | -0.2741 | 0.4832 | 0.4012  | 0.2727 | 0.0952  | 0.7562 | 0.0249  | 0.9263 |
| OLIGO_09913 | BF042876 | SRRM2     | 0.6633  | 0.2803 | -0.4766 | 0.4067 | -0.5541 | 0.2499 | -0.3257 | 0.4396 |
| OLIGO_04721 | BF042879 | CKAP2L    | 0.0203  | 0.9478 | -0.1374 | 0.6348 | -0.3598 | 0.1452 | -0.4832 | 0.0243 |
| OLIGO_09340 | BF042894 | TGFB2     | -0.9606 | 0.0210 | 1.2289  | 0.0016 | 0.0526  | 0.8723 | -0.2682 | 0.3470 |
| OLIGO_09346 | BF042899 | SERPINA3  | -0.4664 | 0.5049 | 0.6314  | 0.3597 | 1.4684  | 0.0519 | 0.6444  | 0.3170 |
| OLIGO_04730 | BF042900 | EBAG9     | 0.4087  | 0.1302 | -0.2342 | 0.3497 | -0.0683 | 0.7497 | 0.2584  | 0.1736 |
| OLIGO_11165 | BF042902 | KIAA0195  | 0.1847  | 0.6221 | 0.6493  | 0.1170 | -0.2309 | 0.5071 | 0.0145  | 0.9637 |
| OLIGO_04726 | BF042909 | SFRS9     | 0.5227  | 0.3165 | 0.0252  | 0.9589 | 0.0215  | 0.9592 | -0.1464 | 0.6879 |
| OLIGO_04723 | BF042913 | NOMO1     | 0.2969  | 0.6108 | -0.1340 | 0.8060 | -0.6714 | 0.1424 | -0.5133 | 0.2002 |
| OLIGO_06331 | BF042920 | Zfp295    | 0.0626  | 0.9144 | 0.2992  | 0.5858 | 0.1675  | 0.6994 | 0.4817  | 0.2020 |
| OLIGO_04005 | BF042921 | MGC18216  | -0.0922 | 0.8756 | 0.6934  | 0.2411 | -1.1986 | 0.0544 | -0.8170 | 0.1502 |
| OLIGO_06344 | BF042937 | CCRN4L    | 1.5266  | 0.0007 | -1.4376 | 0.0006 | 0.6697  | 0.0559 | 0.6944  | 0.0250 |

|             |          |           |         |        |         |        |         |        |         |        |
|-------------|----------|-----------|---------|--------|---------|--------|---------|--------|---------|--------|
| OLIGO_04008 | BF042942 | DHX15     | 0.1105  | 0.7616 | -0.4143 | 0.2809 | -0.4622 | 0.2481 | 0.0552  | 0.8590 |
| OLIGO_10831 | BF042949 | LOC509768 | -0.0070 | 0.9804 | -0.1533 | 0.5650 | -0.4990 | 0.0282 | -0.4077 | 0.0389 |
| OLIGO_00068 | BF042951 | GPX3      | -0.0843 | 0.7379 | -0.3048 | 0.1938 | 0.0691  | 0.7291 | 0.0475  | 0.7838 |
| OLIGO_04652 | BF042952 | WWC3      | -0.2875 | 0.5748 | -0.4256 | 0.3838 | 0.6303  | 0.0966 | 0.4231  | 0.2023 |
| OLIGO_10200 | BF042954 | FLJ11021  | 0.2459  | 0.3384 | -0.5442 | 0.0239 | -0.0054 | 0.9787 | 0.2053  | 0.2444 |
| OLIGO_04231 | BF042956 | TCOF1     | 0.4311  | 0.4580 | 0.4200  | 0.4439 | 0.0246  | 0.9550 | -0.1032 | 0.7889 |
| OLIGO_04232 | BF042958 | MRPL24    | 0.0636  | 0.7331 | -0.2503 | 0.1513 | -0.1055 | 0.4711 | -0.0393 | 0.7589 |
| OLIGO_02884 | BF042964 | NAB2      | 0.5780  | 0.3998 | -0.4057 | 0.5273 | -0.3965 | 0.5610 | -0.1974 | 0.7233 |
| OLIGO_09024 | BF042966 | SFXN1     | -0.1297 | 0.7217 | 1.0838  | 0.0015 | 0.3934  | 0.1683 | 0.6348  | 0.0113 |
| OLIGO_03946 | BF042967 | ABCD3     | 0.6398  | 0.0600 | -1.3101 | 0.0000 | 0.6015  | 0.0309 | 0.4033  | 0.0848 |
| OLIGO_04235 | BF042972 | PHF13     | 0.5620  | 0.1649 | -0.8125 | 0.0331 | 0.3836  | 0.2262 | 0.3491  | 0.2084 |
| OLIGO_07131 | BF042973 | CCDC23    | -1.2148 | 0.0369 | 0.8889  | 0.0883 | 0.2861  | 0.4676 | 0.0837  | 0.8085 |
| OLIGO_04236 | BF042975 | UBP1      | -0.2053 | 0.7334 | 0.1652  | 0.7290 | 0.4663  | 0.1946 | 0.2069  | 0.5230 |
| OLIGO_08975 | BF042983 | BTF3L4    | 0.3443  | 0.5656 | -0.7165 | 0.2331 | 0.1403  | 0.7995 | 0.0075  | 0.9887 |
| OLIGO_04225 | BF042986 | RABGGTA   | -0.2338 | 0.5894 | 0.6844  | 0.0916 | 0.4685  | 0.1679 | 0.1110  | 0.7087 |
| OLIGO_00967 | BF042987 | IFT52     | -1.6722 | 0.0008 | 1.8662  | 0.0001 | -0.1430 | 0.7215 | -0.1489 | 0.6732 |
| OLIGO_09021 | BF042994 | C9orf102  | -0.4629 | 0.2944 | 0.0552  | 0.8931 | 0.3479  | 0.3181 | 0.3060  | 0.3151 |
| OLIGO_09018 | BF042997 | FAM82A    | -0.0711 | 0.8307 | 0.5313  | 0.1528 | 0.8902  | 0.0795 | 0.7337  | 0.1530 |
| OLIGO_09020 | BF043000 | NSUN5     | -0.2070 | 0.5135 | -0.0335 | 0.9098 | 0.2273  | 0.3634 | 0.0393  | 0.8568 |
| OLIGO_01710 | BF043001 | GPR126    | 0.7687  | 0.1896 | -2.0853 | 0.0206 | -0.0470 | 0.9191 | 0.3015  | 0.5331 |
| OLIGO_08875 | BF043005 | PTD004    | 0.3878  | 0.3281 | -0.5677 | 0.1261 | -0.7025 | 0.0241 | -0.4078 | 0.1342 |
| OLIGO_04234 | BF043016 | LOC255783 | 0.3391  | 0.3510 | -0.3836 | 0.2594 | 0.0484  | 0.8651 | -0.0673 | 0.7871 |
| OLIGO_11493 | BF043025 | CMPK      | -0.1927 | 0.5427 | 0.0087  | 0.9767 | -0.9042 | 0.0003 | -0.8276 | 0.0002 |
| OLIGO_03536 | BF043026 | SLC27A1   | 0.1583  | 0.7868 | 0.1250  | 0.8194 | -0.1210 | 0.7937 | -0.1794 | 0.6557 |
| OLIGO_04237 | BF043032 | DNAJA5    | 0.7374  | 0.0219 | -0.1711 | 0.5681 | -0.4930 | 0.0507 | -0.1097 | 0.6221 |
| OLIGO_09348 | BF043033 | UNC13D    | 0.6668  | 0.0618 | -0.2119 | 0.5251 | 0.4167  | 0.1360 | 0.0672  | 0.7833 |
| OLIGO_04729 | BF043035 | COPS3     | 0.2381  | 0.3541 | -0.1780 | 0.4589 | -0.3059 | 0.1291 | -0.2290 | 0.1943 |
| OLIGO_09723 | BF043051 | EIF3S12   | -0.2169 | 0.3867 | 0.0110  | 0.9622 | 0.1014  | 0.6092 | -0.1660 | 0.3352 |
| OLIGO_05075 | BF043052 | UBLCP1    | 0.9633  | 0.0251 | -1.5840 | 0.0001 | -0.0449 | 0.8939 | 0.2568  | 0.3882 |
| OLIGO_05080 | BF043054 | ETF1      | 0.9029  | 0.0015 | -1.2601 | 0.0000 | 0.3327  | 0.1371 | 0.2802  | 0.1502 |
| OLIGO_05079 | BF043056 | PTPN23    | -0.3015 | 0.3235 | 0.6863  | 0.0166 | 0.4376  | 0.0682 | 0.1928  | 0.3577 |
| OLIGO_04661 | BF043067 | ARHGEF3   | -0.0593 | 0.9187 | 0.4890  | 0.3714 | 0.0812  | 0.8586 | 0.2147  | 0.5918 |
| OLIGO_04663 | BF043070 | MGC17624  | 0.3066  | 0.4979 | -1.0289 | 0.0561 | 1.2666  | 0.0500 | 0.7157  | 0.1709 |
| OLIGO_08914 | BF043072 | RAB34     | -1.4524 | 0.0003 | 1.2619  | 0.0008 | 0.1639  | 0.6131 | -0.4654 | 0.0995 |

|             |          |           |         |        |         |        |         |        |         |        |
|-------------|----------|-----------|---------|--------|---------|--------|---------|--------|---------|--------|
| OLIGO_04658 | BF043077 | SCRIB     | 0.5240  | 0.0374 | -0.3323 | 0.1551 | 0.0838  | 0.6734 | -0.0832 | 0.6293 |
| OLIGO_04659 | BF043079 | ITSN1     | 0.2447  | 0.4209 | -0.2546 | 0.3707 | 0.0364  | 0.8789 | 0.0142  | 0.9462 |
| OLIGO_04656 | BF043085 | INTS5     | 0.3340  | 0.3271 | 0.0537  | 0.8647 | 0.2284  | 0.3843 | 0.0845  | 0.7131 |
| OLIGO_11294 | BF043088 | ALMS1     | -0.0138 | 0.9656 | -0.0314 | 0.9155 | 0.0531  | 0.8341 | -0.1156 | 0.5969 |
| OLIGO_08913 | BF043090 | DHX34     | -0.6582 | 0.3490 | -0.1189 | 0.8594 | 1.0534  | 0.1253 | 0.6056  | 0.3445 |
| OLIGO_02185 | BF043095 | NFAT5     | -0.0445 | 0.9091 | -0.5140 | 0.1591 | -0.0390 | 0.8983 | 0.1582  | 0.5542 |
| OLIGO_09310 | BF043099 | GSTK1     | -1.7456 | 0.0229 | 1.8651  | 0.0103 | 2.9078  | 0.0000 | 2.2528  | 0.0000 |
| OLIGO_01756 | BF043107 | MASA      | -0.4198 | 0.3373 | -0.0833 | 0.8383 | -1.6336 | 0.0000 | -1.2642 | 0.0000 |
| OLIGO_10590 | BF043110 | RPL23     | -0.2027 | 0.6817 | -0.0201 | 0.9651 | -0.9340 | 0.0174 | -0.7895 | 0.0206 |
| OLIGO_08830 | BF043113 | KCNK1     | -0.6608 | 0.0655 | 0.8241  | 0.0142 | 1.0530  | 0.0002 | 0.8032  | 0.0012 |
| OLIGO_09307 | BF043118 | TXNDC5    | -0.7013 | 0.0555 | 0.9425  | 0.0059 | -0.5847 | 0.0438 | -0.6998 | 0.0056 |
| OLIGO_04653 | BF043121 | STK17B    | 0.1906  | 0.7307 | 0.4917  | 0.3426 | -0.6562 | 0.1309 | -0.1750 | 0.6451 |
| OLIGO_09308 | BF043130 | HSPBAP1   | -0.3563 | 0.4822 | 0.1091  | 0.8166 | 1.0931  | 0.0064 | 0.4793  | 0.1690 |
| OLIGO_04660 | BF043133 | FRAG1     | 0.3577  | 0.5897 | -0.3348 | 0.5979 | 0.2482  | 0.6696 | -0.3605 | 0.5279 |
| OLIGO_11675 | BF043134 | SS18L2    | -0.1850 | 0.5850 | -0.7525 | 0.0179 | 0.1159  | 0.6623 | 0.0299  | 0.8976 |
| OLIGO_09082 | BF043136 | EPPB9     | -0.5092 | 0.3097 | -0.4179 | 0.3726 | -0.3871 | 0.3244 | 0.0242  | 0.9438 |
| OLIGO_04655 | BF043141 | GPR107    | -0.1386 | 0.7236 | 0.5212  | 0.1915 | -0.1555 | 0.6501 | -0.0275 | 0.9310 |
| OLIGO_04171 | BF043142 | CNNM4     | -0.0234 | 0.9367 | 0.0530  | 0.8512 | 0.1311  | 0.6282 | -0.0679 | 0.7868 |
| OLIGO_09427 | BF043143 | ARHGAP29  | -0.2920 | 0.5423 | 0.6335  | 0.1579 | 1.4364  | 0.0001 | 1.6425  | 0.0000 |
| OLIGO_04172 | BF043145 | LOC617548 | 1.2846  | 0.0112 | -0.8231 | 0.0866 | -0.0447 | 0.9012 | 0.1189  | 0.7059 |
| OLIGO_02513 | BF043146 | LOC196463 | -0.2131 | 0.6440 | 1.1727  | 0.0068 | -1.2039 | 0.0009 | -0.7963 | 0.0121 |
| OLIGO_04173 | BF043147 | YARS      | 0.4127  | 0.2317 | -0.4152 | 0.1983 | -0.7758 | 0.0043 | -0.8190 | 0.0006 |
| OLIGO_04175 | BF043148 | EMILIN1   | -0.4832 | 0.3703 | -0.0252 | 0.9612 | 0.8156  | 0.1206 | 0.7080  | 0.1611 |
| OLIGO_04176 | BF043150 | USP47     | -0.2702 | 0.5779 | -1.8931 | 0.0000 | 0.1828  | 0.4953 | 0.1222  | 0.6017 |
| OLIGO_04178 | BF043154 | CALD1     | -0.1143 | 0.7985 | -0.4373 | 0.2781 | 1.0708  | 0.0017 | 1.2412  | 0.0000 |
| OLIGO_04174 | BF043158 | CDKL5     | -0.2040 | 0.7493 | 0.2264  | 0.6809 | 1.0841  | 0.1214 | 1.1192  | 0.1286 |
| OLIGO_08976 | BF043162 | LOC515511 | -0.1449 | 0.8171 | 0.0878  | 0.8809 | 0.6594  | 0.1799 | 0.3494  | 0.4183 |
| OLIGO_06820 | BF043165 | PAIP2     | 0.6055  | 0.1159 | -1.0610 | 0.0031 | 0.5768  | 0.0593 | 0.5656  | 0.0326 |
| OLIGO_10867 | BF043167 | CLIC4     | 0.9926  | 0.0068 | -0.4491 | 0.1887 | -0.4419 | 0.1228 | 0.1201  | 0.6316 |
| OLIGO_04179 | BF043168 | NEK2      | 0.3527  | 0.2841 | -0.4909 | 0.1097 | -0.6913 | 0.0082 | -0.5239 | 0.0210 |
| OLIGO_06905 | BF043177 | ZNF9      | 0.2360  | 0.6202 | 0.2466  | 0.5820 | -0.9160 | 0.0144 | -0.7047 | 0.0314 |
| OLIGO_09354 | BF043180 | BLOC1S1   | -0.2811 | 0.4737 | 0.0645  | 0.8604 | -0.0455 | 0.8824 | -0.0359 | 0.8937 |
| OLIGO_11485 | BF043183 | RAN       | -0.0737 | 0.9080 | -0.5153 | 0.3877 | -0.7585 | 0.1295 | -0.3211 | 0.4631 |
| OLIGO_01236 | BF043185 | ATF4      | 0.2347  | 0.6310 | -0.1883 | 0.6803 | -1.0094 | 0.0087 | -1.0334 | 0.0022 |

|             |          |           |         |        |         |        |         |        |         |        |
|-------------|----------|-----------|---------|--------|---------|--------|---------|--------|---------|--------|
| OLIGO_05082 | BF043196 | MLL3      | 0.1876  | 0.7034 | -0.4507 | 0.3284 | 0.5598  | 0.1476 | 0.3383  | 0.3173 |
| OLIGO_05084 | BF043207 | TRMT1     | 0.1900  | 0.6779 | -0.4087 | 0.3398 | 0.2750  | 0.4430 | 0.1475  | 0.6383 |
| OLIGO_05086 | BF043208 | TSR1      | 0.7355  | 0.0190 | -0.0669 | 0.8199 | -0.0161 | 0.9476 | 0.1068  | 0.6220 |
| OLIGO_08300 | BF043214 | MKNK1     | 0.7904  | 0.0263 | -1.0276 | 0.0021 | 0.1957  | 0.4816 | 0.1428  | 0.5574 |
| OLIGO_05077 | BF043217 | SPATA20   | 0.4299  | 0.2941 | -0.0312 | 0.9351 | -0.2391 | 0.4563 | -0.1789 | 0.5243 |
| OLIGO_05078 | BF043219 | RAB1A     | 0.3491  | 0.6241 | -0.0276 | 0.9653 | 0.8755  | 0.0802 | 0.6941  | 0.1130 |
| OLIGO_08738 | BF043224 | GATA6     | -0.3846 | 0.7225 | 0.1641  | 0.8755 | 0.7330  | 0.4575 | 0.0658  | 0.9431 |
| OLIGO_04585 | BF043244 | CPT2      | -0.3263 | 0.4466 | -0.6081 | 0.1297 | 0.7904  | 0.0192 | 0.7827  | 0.0087 |
| OLIGO_04934 | BF043246 | ARL6IP4   | 0.1968  | 0.7670 | 0.6287  | 0.3377 | 0.1713  | 0.7879 | -0.1865 | 0.7630 |
| OLIGO_09219 | BF043252 | SEC14L1   | 0.9931  | 0.0080 | -1.0163 | 0.0037 | -0.1838 | 0.5297 | 0.0406  | 0.8740 |
| OLIGO_04587 | BF043254 | LOC651423 | -0.4008 | 0.2712 | -0.1132 | 0.7394 | -0.4446 | 0.1196 | -0.3959 | 0.1135 |
| OLIGO_00586 | BF043255 | NRAS      | 1.0996  | 0.0027 | -0.9613 | 0.0050 | -0.1144 | 0.6894 | 0.0448  | 0.8581 |
| OLIGO_04589 | BF043259 | KIAA0467  | 0.7095  | 0.0281 | -0.3979 | 0.1896 | 0.5866  | 0.0205 | 0.3253  | 0.1414 |
| OLIGO_04588 | BF043260 | DERL2     | 0.6329  | 0.0491 | -0.5124 | 0.0884 | 0.7801  | 0.0021 | 0.6499  | 0.0034 |
| OLIGO_11636 | BF043262 | TOLLIP    | 0.0434  | 0.8944 | 0.2286  | 0.4552 | -0.0812 | 0.7515 | -0.1452 | 0.5179 |
| OLIGO_04586 | BF043264 | LOC124491 | 1.3364  | 0.0002 | -1.0474 | 0.0020 | -0.0037 | 0.9897 | -0.0111 | 0.9645 |
| OLIGO_09265 | BF043271 | ZNF75     | -1.3274 | 0.0004 | 1.4884  | 0.0000 | -0.4656 | 0.1114 | -0.4659 | 0.0653 |
| OLIGO_09030 | BF043272 | GOSR2     | -0.1011 | 0.8002 | -0.6828 | 0.1169 | 0.2957  | 0.4230 | -0.0021 | 0.9948 |
| OLIGO_04580 | BF043284 | PWP2H     | -0.6232 | 0.2722 | 0.8099  | 0.1564 | 0.2768  | 0.5586 | -0.0061 | 0.9885 |
| OLIGO_09268 | BF043289 | PPM1K     | 0.7034  | 0.0288 | -0.7351 | 0.0139 | -0.4792 | 0.0556 | -0.0677 | 0.7565 |
| OLIGO_04577 | BF043290 | SLC35E2   | 0.2571  | 0.4000 | -0.1372 | 0.6309 | -0.0601 | 0.8020 | -0.1921 | 0.3614 |
| OLIGO_10439 | BF043291 | DYNLT1    | 0.0001  | 0.9998 | -0.1695 | 0.6082 | 0.6777  | 0.0187 | 0.3176  | 0.2101 |
| OLIGO_04582 | BF043297 | MYO6      | 0.6819  | 0.2168 | -0.2766 | 0.5919 | 0.1407  | 0.7449 | -0.1488 | 0.6942 |
| OLIGO_04576 | BF043307 | NAALADL2  | -0.2581 | 0.6345 | 0.5609  | 0.2656 | 2.3453  | 0.0000 | 2.2076  | 0.0000 |
| OLIGO_09267 | BF043308 | SCC-112   | -0.3845 | 0.4988 | 0.3725  | 0.4835 | -0.2358 | 0.5967 | -0.1693 | 0.6641 |
| OLIGO_06864 | BF043310 | Pafah1b2  | -0.3095 | 0.2029 | 0.7261  | 0.0015 | -0.4507 | 0.0182 | -0.2295 | 0.1689 |
| OLIGO_10341 | BF043315 | STIM1     | -0.5264 | 0.1476 | 0.7263  | 0.0329 | 0.0400  | 0.8903 | -0.1702 | 0.5002 |
| OLIGO_04182 | BF043327 | RND2      | 0.0451  | 0.9076 | -0.9484 | 0.0101 | 0.3324  | 0.2648 | 0.2355  | 0.3668 |
| OLIGO_07090 | BF043328 | PRMT7     | 0.0646  | 0.8454 | -0.4078 | 0.1883 | 0.1219  | 0.6385 | -0.0803 | 0.7237 |
| OLIGO_04595 | BF043345 | KIAA0999  | 0.1636  | 0.5081 | 0.4027  | 0.0802 | -0.0305 | 0.8763 | -0.3359 | 0.0485 |
| OLIGO_10897 | BF043352 | MGC134073 | -0.5860 | 0.1528 | 0.4907  | 0.2003 | -0.0279 | 0.9307 | 0.0761  | 0.7865 |
| OLIGO_09271 | BF043358 | TLE4      | 0.0664  | 0.9612 | -0.2554 | 0.8472 | 1.0073  | 0.4406 | 0.5902  | 0.6414 |
| OLIGO_04592 | BF043359 | MAPRE2    | -0.7529 | 0.0177 | 0.7712  | 0.0092 | 0.0046  | 0.9852 | -0.0134 | 0.9507 |
| OLIGO_06505 | BF043366 | SLC26A2   | 0.4161  | 0.3714 | -0.2216 | 0.6050 | 1.4669  | 0.0663 | 1.0240  | 0.1540 |

|             |          |           |         |        |         |        |         |        |         |        |
|-------------|----------|-----------|---------|--------|---------|--------|---------|--------|---------|--------|
| OLIGO_06509 | BF043369 | ITFG3     | 0.0431  | 0.9208 | 0.2522  | 0.5339 | 0.0955  | 0.7787 | -0.0714 | 0.8103 |
| OLIGO_11277 | BF043382 | NUP98     | 0.1923  | 0.5631 | -0.4389 | 0.1968 | -0.5977 | 0.0927 | -0.2545 | 0.4028 |
| OLIGO_08020 | BF043383 | CYP20A1   | -0.3935 | 0.1516 | 0.0870  | 0.7344 | -0.2030 | 0.3457 | -0.0545 | 0.7745 |
| OLIGO_04098 | BF043403 | CENTB1    | 0.1767  | 0.7600 | -0.7732 | 0.2231 | -0.1806 | 0.7286 | 0.1556  | 0.7543 |
| OLIGO_04096 | BF043409 | DDX46     | 0.5781  | 0.1334 | -1.0859 | 0.0027 | -0.1181 | 0.6953 | -0.1717 | 0.5154 |
| OLIGO_06751 | BF043418 | LXN       | -0.7024 | 0.0366 | 0.9807  | 0.0017 | 0.4369  | 0.1014 | 0.0109  | 0.9620 |
| OLIGO_09023 | BF043421 | KLF15     | -0.3936 | 0.2552 | 0.3759  | 0.2419 | 1.0496  | 0.0002 | 0.6032  | 0.0114 |
| OLIGO_06490 | BF043423 | SLC10A1   | 0.1374  | 0.7399 | 0.1897  | 0.6240 | 0.6285  | 0.0531 | 0.6410  | 0.0243 |
| OLIGO_09201 | BF043429 | TBCD      | -0.4457 | 0.1462 | 0.3736  | 0.1901 | 0.4657  | 0.0555 | 0.0827  | 0.6944 |
| OLIGO_05017 | BF043437 | ZNF217    | 0.7695  | 0.0260 | -0.2396 | 0.4561 | 0.0969  | 0.7212 | 0.2354  | 0.3205 |
| OLIGO_05011 | BF043439 | TPK1      | -0.1807 | 0.7994 | -0.0027 | 0.9968 | 1.4329  | 0.0104 | 0.8362  | 0.0869 |
| OLIGO_05014 | BF043447 | IDH3G     | 0.4570  | 0.1843 | -0.3151 | 0.3333 | -0.0014 | 0.9959 | -0.0333 | 0.8876 |
| OLIGO_05013 | BF043448 | SFT2D1    | 0.7225  | 0.0769 | -1.3647 | 0.0003 | -0.1279 | 0.6927 | -0.2219 | 0.4268 |
| OLIGO_07532 | BF043450 | C1orf123  | -0.3472 | 0.2323 | 0.0319  | 0.9041 | -0.1000 | 0.6802 | 0.0882  | 0.6976 |
| OLIGO_06971 | BF043452 | GEFT      | -0.2656 | 0.4096 | 0.2419  | 0.4219 | 0.6198  | 0.0144 | 0.4797  | 0.0303 |
| OLIGO_09486 | BF043454 | GCHFR     | 0.1096  | 0.7683 | -0.2325 | 0.5031 | -0.0945 | 0.7474 | -0.4692 | 0.0702 |
| OLIGO_11144 | BF043455 | PSMC6     | 0.4012  | 0.3067 | -0.9782 | 0.0079 | -0.2591 | 0.3996 | 0.0979  | 0.7160 |
| OLIGO_10747 | BF043458 | RABGGTB   | 0.2458  | 0.6536 | -1.6405 | 0.0015 | -0.9284 | 0.0310 | -0.4765 | 0.2053 |
| OLIGO_05015 | BF043465 | AK1       | 0.9651  | 0.0158 | -0.1997 | 0.5903 | 1.2339  | 0.0001 | 1.2626  | 0.0000 |
| OLIGO_01077 | BF043470 | ACTR2     | 0.5262  | 0.3811 | -0.5340 | 0.3419 | 0.1725  | 0.7149 | 0.1293  | 0.7582 |
| OLIGO_05012 | BF043474 | C1orf27   | -0.1578 | 0.7082 | -0.5362 | 0.1642 | 0.7734  | 0.0161 | 0.7297  | 0.0089 |
| OLIGO_05019 | BF043478 | FLJ21816  | 0.6212  | 0.2650 | -0.2075 | 0.6791 | -0.0405 | 0.9291 | -0.3561 | 0.4581 |
| OLIGO_08882 | BF043494 | CBFA2T3   | 1.2332  | 0.0075 | -0.4252 | 0.2500 | -0.4044 | 0.2505 | -0.4930 | 0.1642 |
| OLIGO_04594 | BF043496 | ENTPD4    | 0.1553  | 0.6596 | 0.2928  | 0.3745 | -0.1954 | 0.4794 | -0.1837 | 0.4475 |
| OLIGO_08928 | BF043497 | LOC506943 | 1.9375  | 0.0198 | -2.3547 | 0.0025 | 2.1025  | 0.0015 | 1.5996  | 0.0052 |
| OLIGO_01908 | BF043508 | RALB      | -0.2371 | 0.4732 | -0.7756 | 0.1095 | 0.0406  | 0.8861 | 0.2411  | 0.4376 |
| OLIGO_08992 | BF043512 | CREB5     | 0.2882  | 0.4775 | -0.4420 | 0.2455 | 0.3233  | 0.3080 | 0.2179  | 0.4304 |
| OLIGO_04590 | BF043514 | KIAA0179  | -0.3005 | 0.5191 | 0.0627  | 0.8883 | 0.1484  | 0.7206 | 0.2878  | 0.4815 |
| OLIGO_04593 | BF043518 | BCL9L     | 0.2242  | 0.5416 | -0.1001 | 0.7720 | -0.1500 | 0.6021 | -0.1043 | 0.6786 |
| OLIGO_04521 | BF043527 | ZNF42     | 0.2255  | 0.6492 | -0.1213 | 0.7959 | 0.5479  | 0.2915 | 0.5787  | 0.2973 |
| OLIGO_09597 | BF043535 | ASS       | -0.8744 | 0.0513 | 1.8079  | 0.0000 | -1.4286 | 0.0001 | -1.2331 | 0.0001 |
| OLIGO_04108 | BF043536 | OSBP2     | 0.5445  | 0.3066 | 0.2085  | 0.6754 | -0.5493 | 0.1883 | -0.4780 | 0.1910 |
| OLIGO_08931 | BF043547 | TIMP1     | 0.9317  | 0.2183 | -1.0367 | 0.1657 | -0.2852 | 0.6711 | 0.7180  | 0.2907 |
| OLIGO_04110 | BF043548 | COQ9      | 0.0047  | 0.9864 | 0.0923  | 0.7208 | 0.0970  | 0.6709 | -0.0341 | 0.8620 |

|             |          |             |         |        |         |        |         |        |         |        |
|-------------|----------|-------------|---------|--------|---------|--------|---------|--------|---------|--------|
| OLIGO_04105 | BF043562 | PSD3        | 0.9397  | 0.0074 | -0.6157 | 0.0582 | 0.3669  | 0.1653 | 0.5486  | 0.0171 |
| OLIGO_04104 | BF043565 | NCKIPSD     | 0.6273  | 0.0167 | -0.6505 | 0.0076 | -0.0583 | 0.7824 | 0.0559  | 0.7558 |
| OLIGO_00043 | BF043567 | ETFA        | 0.2208  | 0.4096 | -0.5327 | 0.0332 | -0.2952 | 0.1634 | -0.3329 | 0.0710 |
| OLIGO_04102 | BF043570 | FBXL10      | 0.6577  | 0.4298 | -0.7861 | 0.3359 | -0.3542 | 0.6545 | -0.2628 | 0.7319 |
| OLIGO_11148 | BF043574 | EIF2S3      | 0.2280  | 0.6675 | -0.3860 | 0.4396 | -0.6463 | 0.1256 | 0.2837  | 0.4364 |
| OLIGO_04111 | BF043575 | TRMU        | 0.5523  | 0.2945 | -0.7197 | 0.1732 | -0.6402 | 0.2060 | -0.3315 | 0.4603 |
| OLIGO_11469 | BF043576 | ME2         | -0.2671 | 0.4940 | 0.2410  | 0.5171 | -0.9270 | 0.0791 | -0.5830 | 0.2054 |
| OLIGO_04106 | BF043586 | C3orf38     | 0.2012  | 0.6100 | -1.3116 | 0.0004 | 0.0353  | 0.9092 | 0.2605  | 0.3359 |
| OLIGO_11470 | BF043598 | RGS20       | 0.2316  | 0.4896 | 0.1899  | 0.5446 | -0.5456 | 0.0382 | -0.2708 | 0.2392 |
| OLIGO_08881 | BF043599 | ATAD4       | 0.2661  | 0.4984 | -0.0466 | 0.8992 | -0.1118 | 0.7215 | -0.1243 | 0.6462 |
| OLIGO_02628 | BF043601 | RBM10       | -0.6107 | 0.0842 | 0.7119  | 0.0572 | -0.5612 | 0.1306 | -0.7357 | 0.1093 |
| OLIGO_05018 | BF043620 | HK2         | 1.6997  | 0.0000 | -1.5945 | 0.0000 | -1.3780 | 0.0000 | -0.9279 | 0.0011 |
| OLIGO_08380 | BF043621 | PYGO2       | 0.2793  | 0.1907 | -0.2271 | 0.2538 | -0.1021 | 0.5445 | -0.0759 | 0.6089 |
| OLIGO_09452 | BF043630 | MKRN1       | 0.5854  | 0.0733 | -0.9573 | 0.0017 | 1.1647  | 0.0000 | 1.0838  | 0.0000 |
| OLIGO_09453 | BF043635 | PVR         | -0.6494 | 0.1789 | 0.9847  | 0.0295 | -1.2038 | 0.0017 | -0.8101 | 0.0174 |
| OLIGO_04960 | BF043640 | C18orf22    | 0.2203  | 0.6135 | 0.0652  | 0.8729 | 0.4618  | 0.1773 | 0.2178  | 0.4669 |
| OLIGO_04532 | BF043647 | MGC4268     | 0.1465  | 0.7356 | 0.0604  | 0.8807 | 0.2841  | 0.3995 | 0.0954  | 0.7466 |
| OLIGO_04531 | BF043649 | SOX15       | 0.3835  | 0.5429 | -0.3170 | 0.5976 | 0.5829  | 0.2126 | 0.5977  | 0.1496 |
| OLIGO_04527 | BF043654 | UBE2D4      | -0.1232 | 0.8055 | 0.7244  | 0.1219 | -0.1383 | 0.7242 | -0.0213 | 0.9505 |
| OLIGO_04526 | BF043656 | RFX1        | 0.5481  | 0.2127 | -0.0677 | 0.8692 | 0.2006  | 0.5602 | 0.1254  | 0.6774 |
| OLIGO_11176 | BF043659 | MGC137753   | -0.4417 | 0.2545 | 0.4054  | 0.2663 | -0.2942 | 0.3326 | -0.3364 | 0.2059 |
| OLIGO_09835 | BF043660 | EEF1D       | -0.1964 | 0.6888 | 0.2931  | 0.5228 | -0.5403 | 0.1602 | -0.5442 | 0.1063 |
| OLIGO_09234 | BF043663 | C18orf25    | 0.8740  | 0.0069 | -0.9949 | 0.0010 | 0.6939  | 0.0065 | 0.8566  | 0.0001 |
| OLIGO_09237 | BF043671 | PPIH        | -0.2057 | 0.5522 | -0.4017 | 0.2142 | 0.6436  | 0.0184 | 0.2952  | 0.2147 |
| OLIGO_08828 | BF043677 | KIF26A      | -0.6783 | 0.0806 | 0.3775  | 0.2979 | 0.5741  | 0.0596 | 0.3044  | 0.2550 |
| OLIGO_09368 | BF043680 | C3orf10     | -0.3999 | 0.3157 | 0.2801  | 0.4524 | 0.1799  | 0.5646 | 0.2572  | 0.3469 |
| OLIGO_04520 | BF043681 | LYZ         | -1.0503 | 0.2662 | -1.3911 | 0.0986 | 0.7559  | 0.2965 | 0.8555  | 0.1758 |
| OLIGO_04518 | BF043684 | CDYL        | -0.0628 | 0.9538 | -0.5964 | 0.5982 | 0.0883  | 0.9135 | 0.9075  | 0.2316 |
| OLIGO_04523 | BF043688 | TMEM16H     | 0.3947  | 0.6098 | -0.5371 | 0.4759 | -0.7565 | 0.3050 | -1.1270 | 0.1387 |
| OLIGO_07655 | BF043697 | ODC1        | 1.4481  | 0.0042 | -1.5271 | 0.0012 | -1.7916 | 0.0000 | -1.7207 | 0.0000 |
| OLIGO_04525 | BF043705 | LPAAT-THETA | 0.8247  | 0.1342 | -1.0123 | 0.0484 | 1.6015  | 0.0003 | 1.8234  | 0.0000 |
| OLIGO_04529 | BF043709 | DPP9        | 0.0625  | 0.8489 | 0.2418  | 0.4307 | -0.0351 | 0.8913 | -0.1064 | 0.6364 |
| OLIGO_07341 | BF043710 | BCAR3       | -0.2172 | 0.6787 | 0.3765  | 0.4428 | -0.3166 | 0.4412 | -0.7267 | 0.0439 |
| OLIGO_04522 | BF043717 | LOC55565    | -0.0882 | 0.8029 | 0.0400  | 0.9036 | 0.4911  | 0.0791 | -0.1486 | 0.5405 |

|             |          |                   |         |        |         |        |         |        |         |        |
|-------------|----------|-------------------|---------|--------|---------|--------|---------|--------|---------|--------|
| OLIGO_04075 | BF043719 | PHOSPHO1          | 0.6438  | 0.1691 | -0.8208 | 0.0611 | 0.6225  | 0.0900 | 0.5906  | 0.0662 |
| OLIGO_08894 | BF043720 | TBC1D8            | 0.3556  | 0.3730 | -0.3804 | 0.3083 | 0.3743  | 0.2325 | 0.2465  | 0.3733 |
| OLIGO_06430 | BF043722 | IFNGR2            | 0.0175  | 0.9710 | 0.5708  | 0.2084 | -0.2175 | 0.5616 | 0.0050  | 0.9879 |
| OLIGO_12255 | BF043729 | MDH1              | -1.2276 | 0.0003 | 1.2655  | 0.0001 | -0.4858 | 0.0672 | -0.6586 | 0.0053 |
| OLIGO_08896 | BF043732 | LHFP              | 0.2875  | 0.6604 | -0.7162 | 0.2754 | -0.7833 | 0.2173 | -0.3655 | 0.5402 |
| OLIGO_07251 | BF043734 | MTMR4             | -0.7139 | 0.0462 | 1.0452  | 0.0019 | 0.5824  | 0.0380 | 0.4698  | 0.0558 |
| OLIGO_06482 | BF043738 | TKT               | 0.2793  | 0.5580 | -0.2259 | 0.6124 | 0.1864  | 0.6180 | 0.5202  | 0.1123 |
| OLIGO_06465 | BF043744 | NPNT              | -2.2509 | 0.0004 | 2.3417  | 0.0001 | 0.5366  | 0.2865 | 0.2918  | 0.5182 |
| OLIGO_06432 | BF043749 | ADFP              | 1.2847  | 0.0115 | -1.1745 | 0.0135 | 0.6255  | 0.1200 | 0.8428  | 0.0185 |
| OLIGO_06841 | BF043760 | HNRPA0            | -0.7652 | 0.0818 | 0.5796  | 0.1520 | -0.1653 | 0.6095 | -0.6174 | 0.2132 |
| OLIGO_04964 | BF043762 | KIAA1128          | 0.5503  | 0.0784 | -0.4078 | 0.1607 | 0.9813  | 0.0001 | 0.8861  | 0.0000 |
| OLIGO_04965 | BF043765 | DKFZP686M01<br>99 | 0.2181  | 0.5481 | -0.1323 | 0.6957 | 0.4040  | 0.1636 | -0.0818 | 0.7473 |
| OLIGO_04966 | BF043775 | BPI               | 0.6767  | 0.5206 | -2.4828 | 0.0084 | 1.6997  | 0.0072 | 1.9920  | 0.0002 |
| OLIGO_11420 | BF043779 | SENP3             | 0.4123  | 0.2331 | -0.7785 | 0.0172 | 0.5073  | 0.0644 | 0.4738  | 0.0463 |
| OLIGO_08968 | BF043784 | SENP6             | 0.4317  | 0.1572 | -0.7996 | 0.0053 | -0.1358 | 0.5706 | -0.0376 | 0.8575 |
| OLIGO_04959 | BF043796 | FLJ37440          | -0.3743 | 0.2764 | 0.4976  | 0.1220 | 0.5720  | 0.0357 | 0.4692  | 0.0476 |
| OLIGO_04961 | BF043801 | C15orf23          | 0.1201  | 0.6630 | -0.3872 | 0.1311 | -0.7265 | 0.0010 | -0.5623 | 0.0032 |
| OLIGO_04962 | BF043803 | MCRS1             | -0.0479 | 0.9063 | -0.6127 | 0.1147 | -0.6266 | 0.0477 | -0.1750 | 0.5267 |
| OLIGO_04957 | BF043805 | PCF11             | 0.3259  | 0.4197 | -0.5315 | 0.1598 | 0.3877  | 0.2251 | 0.0155  | 0.9554 |
| OLIGO_07696 | BF043814 | CBL               | 0.2270  | 0.5816 | -0.1252 | 0.7453 | 0.3870  | 0.2310 | 0.4666  | 0.0993 |
| OLIGO_09189 | BF043815 | JAG2              | -0.1988 | 0.5177 | 0.5045  | 0.0803 | 0.1862  | 0.4437 | -0.0526 | 0.8039 |
| OLIGO_09036 | BF043830 | GABARAPL1         | 0.3245  | 0.4219 | -0.2918 | 0.4400 | -0.8840 | 0.0054 | -0.7885 | 0.0046 |
| OLIGO_09742 | BF043867 | FLJ38663          | -0.0219 | 0.9188 | -0.5197 | 0.0097 | -0.5896 | 0.0006 | -0.3504 | 0.0182 |
| OLIGO_06449 | BF043883 | PSPH              | 0.3546  | 0.5159 | -0.0055 | 0.9915 | -2.0436 | 0.0000 | -1.7095 | 0.0000 |
| OLIGO_06438 | BF043887 | SYNGR1            | 1.6009  | 0.0002 | -0.6616 | 0.0970 | -0.1970 | 0.5561 | 0.0338  | 0.9098 |
| OLIGO_04076 | BF043889 | ENPP1             | 0.3948  | 0.6128 | -1.2715 | 0.0803 | 2.9320  | 0.0000 | 2.4197  | 0.0000 |
| OLIGO_03331 | BF043890 | YTHDC1            | 0.3410  | 0.1860 | -0.4648 | 0.0538 | -0.2028 | 0.3175 | -0.0764 | 0.6660 |
| OLIGO_06471 | BF043894 | APITD1            | -0.3382 | 0.2623 | 0.2684  | 0.3393 | -0.1383 | 0.5650 | -0.2696 | 0.1944 |
| OLIGO_06464 | BF043899 | DCXR              | 0.1135  | 0.7477 | 0.5452  | 0.0965 | 0.4672  | 0.0959 | 0.3120  | 0.1980 |
| OLIGO_01438 | BF043904 | KIAA0101          | -1.3465 | 0.0072 | 1.8343  | 0.0001 | -1.4064 | 0.0004 | -1.3690 | 0.0001 |
| OLIGO_08838 | BF043910 | PSEN2             | -0.3035 | 0.4586 | 0.1756  | 0.6463 | 1.0710  | 0.0009 | 0.4802  | 0.0881 |
| OLIGO_11684 | BF043911 | ZFP95             | -0.5858 | 0.3973 | 0.0591  | 0.9272 | 0.6815  | 0.2091 | 0.7078  | 0.1364 |
| OLIGO_08861 | BF043912 | ANKRD15           | -0.2685 | 0.2661 | 0.3319  | 0.1417 | -0.3479 | 0.0662 | 0.1872  | 0.2583 |

|             |          |           |         |        |         |        |         |        |         |        |
|-------------|----------|-----------|---------|--------|---------|--------|---------|--------|---------|--------|
| OLIGO_10779 | BF043914 | TIMM23    | 0.1629  | 0.7645 | -0.9854 | 0.1001 | 0.3204  | 0.5223 | -0.4115 | 0.4025 |
| OLIGO_08846 | BF043915 | C3orf21   | 0.1123  | 0.9047 | -0.0508 | 0.9526 | 1.2029  | 0.0528 | 0.9309  | 0.0867 |
| OLIGO_08841 | BF043916 | TADA1L    | 0.0971  | 0.7301 | -0.1872 | 0.4758 | -0.5331 | 0.0168 | -0.5306 | 0.0064 |
| OLIGO_08840 | BF043917 | GPATC1    | -0.1687 | 0.4527 | 0.0494  | 0.8136 | 0.4700  | 0.0087 | 0.1068  | 0.4900 |
| OLIGO_05126 | BF043931 | IGF2BP3   | 0.0505  | 0.9274 | -0.1383 | 0.7898 | 0.0029  | 0.9947 | 0.0884  | 0.8162 |
| OLIGO_11772 | BF043937 | KCTD18    | -0.0646 | 0.8815 | -0.0201 | 0.9604 | 0.1049  | 0.7578 | -0.1117 | 0.7102 |
| OLIGO_04891 | BF043938 | TSPAN17   | -0.0012 | 0.9986 | 0.1167  | 0.8737 | 2.0474  | 0.0000 | 1.6706  | 0.0001 |
| OLIGO_04892 | BF043942 | TAX1BP3   | 0.1934  | 0.4355 | -0.0377 | 0.8707 | 0.3918  | 0.0448 | -0.0043 | 0.9798 |
| OLIGO_09199 | BF043945 | LMBR1     | -0.4146 | 0.2375 | 0.2203  | 0.5020 | 0.4136  | 0.1338 | 0.0266  | 0.9130 |
| OLIGO_04890 | BF043948 | ETS1      | -0.0494 | 0.9189 | 1.2527  | 0.0073 | -1.8638 | 0.0000 | -1.5628 | 0.0000 |
| OLIGO_04885 | BF043954 | HDAC7A    | 0.2745  | 0.4547 | -0.1720 | 0.6149 | -0.0127 | 0.9651 | -0.2320 | 0.3584 |
| OLIGO_07362 | BF043955 | CDC26     | 0.0461  | 0.9651 | -0.2895 | 0.7798 | -0.2825 | 0.7832 | -0.5451 | 0.5887 |
| OLIGO_03481 | BF043956 | ACAS2L    | 0.5532  | 0.4550 | -0.7479 | 0.2804 | -0.5397 | 0.3525 | -0.1858 | 0.7145 |
| OLIGO_04886 | BF043957 | CLDND1    | 0.2369  | 0.5887 | -0.2150 | 0.5997 | 0.9446  | 0.0061 | 0.9377  | 0.0019 |
| OLIGO_09422 | BF043961 | Prkar2a   | 0.3570  | 0.2846 | -0.4923 | 0.1136 | 0.0511  | 0.8463 | 0.3443  | 0.1336 |
| OLIGO_04887 | BF043962 | BCL2L13   | -0.2247 | 0.5944 | 0.7591  | 0.0546 | 0.1740  | 0.5956 | -0.0052 | 0.9857 |
| OLIGO_04895 | BF043966 | BAT3      | -0.5262 | 0.1812 | 0.7570  | 0.0411 | 0.3462  | 0.2613 | 0.0752  | 0.7802 |
| OLIGO_07867 | BF043967 | TRIP10    | 0.9486  | 0.0362 | -1.1926 | 0.0040 | 0.3744  | 0.2840 | 0.4028  | 0.1897 |
| OLIGO_06676 | BF043968 | MRPL41    | 0.2404  | 0.5251 | -0.5220 | 0.1870 | 0.2150  | 0.5252 | -0.2357 | 0.4779 |
| OLIGO_07901 | BF043971 | FBXO3     | 0.6741  | 0.0255 | -0.6765 | 0.0166 | -0.0814 | 0.7299 | -0.0076 | 0.9705 |
| OLIGO_09423 | BF043973 | RASGRP2   | -1.3609 | 0.0005 | 1.9630  | 0.0000 | -0.1789 | 0.5574 | -0.2649 | 0.3182 |
| OLIGO_09420 | BF043981 | GAMT      | -1.6039 | 0.0028 | 1.7470  | 0.0005 | 0.7456  | 0.0757 | 0.3726  | 0.3100 |
| OLIGO_09421 | BF043988 | LOC515176 | 0.7006  | 0.0233 | -0.3690 | 0.1972 | 0.4538  | 0.0586 | 0.5808  | 0.0058 |
| OLIGO_04893 | BF043991 | C1orf172  | 0.4260  | 0.1291 | -0.2993 | 0.2507 | 0.2804  | 0.2075 | -0.0959 | 0.6185 |
| OLIGO_06715 | BF043994 | MRPL42    | 0.0723  | 0.8640 | -0.1125 | 0.7759 | 0.1459  | 0.6595 | -0.1902 | 0.5117 |
| OLIGO_08292 | BF043996 | MTHFD1    | -0.6983 | 0.1094 | 0.2256  | 0.5797 | -1.2213 | 0.0004 | -1.3078 | 0.0000 |
| OLIGO_04387 | BF044009 | SEC24D    | 0.4342  | 0.2155 | -0.2407 | 0.4627 | 0.4409  | 0.1087 | 0.4237  | 0.0784 |
| OLIGO_07165 | BF044010 | MFAP4     | -0.2962 | 0.3787 | 0.3035  | 0.3358 | 0.2336  | 0.3743 | 0.3018  | 0.1881 |
| OLIGO_04388 | BF044011 | C9orf91   | 0.3078  | 0.4462 | 0.2257  | 0.5502 | 1.2405  | 0.0001 | 0.8592  | 0.0021 |
| OLIGO_04389 | BF044013 | IER3IP1   | 0.4997  | 0.1601 | -0.7148 | 0.0674 | 0.3855  | 0.2485 | 0.3200  | 0.3231 |
| OLIGO_04392 | BF044029 | Elf4      | 0.7296  | 0.2311 | -1.0516 | 0.0836 | -0.1572 | 0.7830 | 0.2135  | 0.7003 |
| OLIGO_01376 | BF044038 | PIP5K1A   | 0.1459  | 0.6178 | -0.2460 | 0.3686 | -0.3356 | 0.1434 | -0.5581 | 0.0056 |
| OLIGO_08849 | BF044050 | SYT4      | 0.2270  | 0.7164 | -0.2778 | 0.6447 | -0.3922 | 0.3959 | -0.6748 | 0.0956 |
| OLIGO_08842 | BF044052 | LIMK2     | -0.6923 | 0.1334 | 1.0966  | 0.0115 | 1.2778  | 0.0004 | 0.8158  | 0.0096 |

|             |          |           |         |        |         |        |         |        |         |        |
|-------------|----------|-----------|---------|--------|---------|--------|---------|--------|---------|--------|
| OLIGO_08844 | BF044056 | TADA3L    | -1.2349 | 0.0283 | 1.3684  | 0.0089 | 0.0764  | 0.8609 | -0.1412 | 0.7116 |
| OLIGO_08864 | BF044063 | SERPINB5  | 1.3001  | 0.0054 | -2.0656 | 0.0000 | 1.2391  | 0.0008 | 1.0712  | 0.0011 |
| OLIGO_08854 | BF044067 | PVT1      | -0.5589 | 0.1899 | 0.3726  | 0.3470 | -0.4942 | 0.1434 | -0.3936 | 0.1791 |
| OLIGO_08859 | BF044073 | RBM33     | 0.2415  | 0.4704 | 0.0257  | 0.9343 | -0.1415 | 0.5874 | -0.3025 | 0.1845 |
| OLIGO_11544 | BF044077 | PRKAB1    | -0.0562 | 0.8559 | -0.0604 | 0.8349 | -0.1978 | 0.4154 | -0.2294 | 0.2806 |
| OLIGO_07050 | BF044078 | NAV2      | 0.4782  | 0.3112 | -0.2826 | 0.5213 | 1.0589  | 0.0047 | 1.0736  | 0.0013 |
| OLIGO_08857 | BF044082 | TCEB3     | 0.5008  | 0.3562 | -0.5822 | 0.2700 | 0.0718  | 0.8748 | 0.3364  | 0.4631 |
| OLIGO_08837 | BF044100 | PDGFA     | -0.0171 | 0.9583 | 0.0348  | 0.9087 | -0.9786 | 0.0002 | -0.7689 | 0.0007 |
| OLIGO_04902 | BF044105 | ZNF239    | -0.1297 | 0.7738 | 0.4697  | 0.2644 | -1.1793 | 0.0010 | -1.0310 | 0.0010 |
| OLIGO_04900 | BF044107 | METTL7B   | -1.3686 | 0.2269 | -0.3390 | 0.7602 | 0.6811  | 0.2814 | 0.5283  | 0.3304 |
| OLIGO_04901 | BF044110 | COQ4      | 0.2230  | 0.5872 | 0.1777  | 0.6457 | -0.3008 | 0.3501 | -0.1000 | 0.7225 |
| OLIGO_11589 | BF044111 | AP1M1     | -1.2097 | 0.0253 | 1.4303  | 0.0048 | 0.1998  | 0.6364 | -0.0739 | 0.8417 |
| OLIGO_03950 | BF044128 | SULT1E1   | -0.3407 | 0.7422 | 0.5290  | 0.5680 | 3.3608  | 0.0000 | 4.1298  | 0.0000 |
| OLIGO_04897 | BF044131 | DUSP14    | 0.6083  | 0.0934 | 0.1585  | 0.6396 | -0.3506 | 0.2168 | -0.0109 | 0.9650 |
| OLIGO_04898 | BF044135 | SCYE1     | 0.7048  | 0.0412 | -0.2905 | 0.3661 | -0.4363 | 0.1082 | -0.1562 | 0.5090 |
| OLIGO_08934 | BF044136 | LMBRD1    | 0.9425  | 0.0119 | -1.3374 | 0.0001 | 0.6989  | 0.0176 | 0.4061  | 0.1136 |
| OLIGO_09115 | BF044141 | LOC538963 | 0.0249  | 0.9521 | -0.2705 | 0.4888 | 0.0470  | 0.8850 | -0.0970 | 0.7333 |
| OLIGO_04906 | BF044143 | RNF141    | -0.2973 | 0.4981 | -0.3073 | 0.4982 | 0.0313  | 0.9202 | 0.0533  | 0.8450 |
| OLIGO_04905 | BF044145 | LOC517135 | 0.4599  | 0.5406 | -0.7313 | 0.3239 | 0.7594  | 0.2952 | 0.4767  | 0.4887 |
| OLIGO_04899 | BF044151 | SHPRH     | 0.4458  | 0.6038 | -0.1335 | 0.8726 | -0.0064 | 0.9936 | -0.1801 | 0.8176 |
| OLIGO_11149 | BF044152 | MAPK3     | -0.1537 | 0.7469 | -0.0265 | 0.9537 | -0.2789 | 0.5336 | -0.1437 | 0.7324 |
| OLIGO_04903 | BF044155 | UNQ338    | -0.6184 | 0.1463 | 0.8043  | 0.0436 | 0.4357  | 0.1915 | 0.1533  | 0.5993 |
| OLIGO_08930 | BF044158 | TCF15     | 0.2326  | 0.8743 | -0.1328 | 0.9246 | 0.3654  | 0.7849 | 0.2530  | 0.8469 |
| OLIGO_07967 | BF044163 | MAPRE1    | -0.0214 | 0.9666 | -0.8761 | 0.0670 | -0.6296 | 0.1191 | -0.8077 | 0.0218 |
| OLIGO_04395 | BF044177 | MGC72075  | 0.1979  | 0.8407 | 0.3404  | 0.7236 | 1.5703  | 0.0952 | 1.0588  | 0.2283 |
| OLIGO_04394 | BF044178 | FLJ21106  | -0.0730 | 0.8716 | -0.2212 | 0.5978 | -0.2932 | 0.4042 | -0.2927 | 0.3431 |
| OLIGO_10844 | BF044179 | GRK5      | 0.3392  | 0.5056 | -0.6343 | 0.1908 | 0.1773  | 0.6338 | 0.2059  | 0.5263 |
| OLIGO_09541 | BF044183 | LOC537418 | -0.9382 | 0.0049 | 1.5250  | 0.0000 | -0.3882 | 0.1412 | -0.4897 | 0.0322 |
| OLIGO_00617 | BF044199 | C1orf43   | 0.2405  | 0.5777 | -0.6813 | 0.0923 | -0.8305 | 0.0145 | -0.5075 | 0.0874 |
| OLIGO_06353 | BF044215 | SCRN2     | 0.1874  | 0.6693 | 0.4629  | 0.2623 | 0.3561  | 0.3004 | 0.2731  | 0.3643 |
| OLIGO_10846 | BF044216 | PKIB      | -0.3151 | 0.6211 | 0.2681  | 0.6451 | 1.7778  | 0.0003 | 1.5949  | 0.0002 |
| OLIGO_08770 | BF044220 | ZNF131    | 0.1848  | 0.6487 | -0.6136 | 0.1062 | 0.5771  | 0.0724 | 0.5086  | 0.0687 |
| OLIGO_08754 | BF044230 | AP4S1     | -0.2117 | 0.5607 | -0.1195 | 0.7296 | 0.2429  | 0.4715 | 0.0642  | 0.8344 |
| OLIGO_06342 | BF044233 | TOR1AIP2  | 0.6116  | 0.2158 | -0.1282 | 0.7826 | 1.0379  | 0.0076 | 1.2399  | 0.0003 |

|             |          |             |         |        |         |        |         |        |         |        |
|-------------|----------|-------------|---------|--------|---------|--------|---------|--------|---------|--------|
| OLIGO_08771 | BF044239 | SYAP1       | -0.0439 | 0.8872 | -0.3692 | 0.2005 | 0.0128  | 0.9587 | 0.3317  | 0.1195 |
| OLIGO_06329 | BF044242 | FLJ10081    | 0.3011  | 0.7230 | 0.8593  | 0.3399 | 0.3402  | 0.5623 | 0.2084  | 0.6852 |
| OLIGO_10991 | BF044244 | STRA6       | -1.6671 | 0.0740 | 1.7067  | 0.0506 | 0.3257  | 0.6735 | -0.2059 | 0.7685 |
| OLIGO_06328 | BF044245 | FKBP4       | -0.1788 | 0.7238 | 0.1596  | 0.7411 | -0.0145 | 0.9735 | 0.2287  | 0.6020 |
| OLIGO_10419 | BF044247 | RPL28       | -0.0953 | 0.8770 | 0.0449  | 0.9378 | -0.4809 | 0.3202 | -0.7005 | 0.1017 |
| OLIGO_06334 | BF044250 | C1S         | 0.3976  | 0.3369 | 0.1604  | 0.6787 | -0.0182 | 0.9553 | -0.0345 | 0.9033 |
| OLIGO_06333 | BF044251 | C14orf46    | 0.6611  | 0.2168 | 0.5423  | 0.2785 | -0.3740 | 0.3727 | 0.0675  | 0.8541 |
| OLIGO_06302 | BF044261 | SGK3        | 0.0922  | 0.9252 | -0.1858 | 0.8355 | 1.0866  | 0.0756 | 0.9329  | 0.0843 |
| OLIGO_04015 | BF044263 | CCDC82      | 0.2319  | 0.4858 | -0.8124 | 0.0586 | -0.3669 | 0.2954 | 0.0414  | 0.8757 |
| OLIGO_06351 | BF044267 | ZC3H11A     | -0.5539 | 0.2024 | 0.2331  | 0.5659 | 0.3690  | 0.2784 | 0.5442  | 0.0682 |
| OLIGO_06352 | BF044268 | Lmo7        | -0.2116 | 0.7432 | 0.3415  | 0.5762 | 0.4566  | 0.3617 | 0.2138  | 0.6256 |
| OLIGO_06330 | BF044273 | RTTN        | 0.8281  | 0.0655 | 0.4558  | 0.2805 | -0.3248 | 0.3557 | -0.1962 | 0.5238 |
| OLIGO_06335 | BF044277 | LOC617475   | 0.2596  | 0.4714 | -0.3992 | 0.2365 | 0.2982  | 0.2913 | 0.4441  | 0.0730 |
| OLIGO_07540 | BF044279 | C10orf84    | 0.0902  | 0.7717 | -0.6393 | 0.0283 | -0.4565 | 0.0616 | -0.4566 | 0.0327 |
| OLIGO_04011 | BF044280 | PFDN4       | -1.2739 | 0.0642 | 0.8500  | 0.1862 | -1.2878 | 0.0171 | -1.2795 | 0.0069 |
| OLIGO_06309 | BF044284 | FLJ20551    | -0.3951 | 0.1113 | 0.2615  | 0.2561 | -0.0288 | 0.8836 | 0.1328  | 0.4368 |
| OLIGO_08776 | BF044285 | SPIRE1      | -0.2235 | 0.5571 | 0.3761  | 0.2911 | 0.0661  | 0.8248 | 0.1182  | 0.6509 |
| OLIGO_08775 | BF044286 | ECD         | 0.3441  | 0.3909 | -0.4973 | 0.2179 | 0.2140  | 0.5499 | 0.1735  | 0.6072 |
| OLIGO_11297 | BF044292 | CAPZB       | 0.8754  | 0.0372 | -1.4125 | 0.0003 | -0.1772 | 0.5938 | -0.0359 | 0.9007 |
| OLIGO_09230 | BF044297 | ZCSL2       | 0.8437  | 0.0841 | -0.8584 | 0.0603 | -0.2158 | 0.5723 | -0.0602 | 0.8571 |
| OLIGO_04831 | BF044304 | PLSCR1      | 0.6259  | 0.0446 | -0.3034 | 0.2953 | 0.3056  | 0.2134 | 0.3369  | 0.1196 |
| OLIGO_06590 | BF044310 | LAPTM4A     | 1.0762  | 0.0007 | -1.3704 | 0.0000 | 0.1773  | 0.4792 | 0.4086  | 0.0604 |
| OLIGO_04827 | BF044311 | ARL4C       | 0.0989  | 0.7782 | -0.3318 | 0.3127 | -0.1024 | 0.7100 | 0.0329  | 0.8912 |
| OLIGO_06918 | BF044326 | MRPL20      | 0.5723  | 0.1697 | -0.1007 | 0.7959 | -0.4061 | 0.2137 | -0.4522 | 0.1139 |
| OLIGO_09144 | BF044334 | FYCO1       | 0.0613  | 0.8973 | 0.3744  | 0.3994 | 0.5666  | 0.1284 | 0.5255  | 0.1073 |
| OLIGO_04412 | BF044335 | ASB3        | -0.6007 | 0.0594 | 0.3514  | 0.2361 | 0.2661  | 0.2892 | 0.0395  | 0.8565 |
| OLIGO_03362 | BF044337 | PPA1        | 0.6500  | 0.1660 | -0.1910 | 0.6626 | -1.9738 | 0.0000 | -1.6631 | 0.0000 |
| OLIGO_03341 | BF044339 | GLS         | -0.6306 | 0.0495 | 0.7946  | 0.0080 | -0.0777 | 0.7596 | -0.3983 | 0.0766 |
| OLIGO_04408 | BF044355 | CDCP1       | 0.2166  | 0.5556 | 0.0212  | 0.9506 | 1.2192  | 0.0000 | 1.1697  | 0.0000 |
| OLIGO_04409 | BF044358 | C16orf57    | 0.2195  | 0.4844 | -0.1282 | 0.6624 | 0.1351  | 0.5828 | 0.1479  | 0.4923 |
| OLIGO_04410 | BF044360 | CXorf26     | 0.3814  | 0.3616 | -0.6164 | 0.1152 | 0.1685  | 0.6069 | 0.0210  | 0.9415 |
| OLIGO_04017 | BF044364 | connexin 26 | 0.6700  | 0.4312 | -0.2514 | 0.7398 | 2.9453  | 0.0000 | 2.8750  | 0.0000 |
| OLIGO_04829 | BF044371 | SURB7       | -0.6660 | 0.0483 | 0.7386  | 0.0193 | -0.0387 | 0.8834 | -0.5232 | 0.0239 |
| OLIGO_04826 | BF044372 | FAM49B      | 0.5339  | 0.1556 | -0.3652 | 0.2987 | -0.5735 | 0.0518 | -0.5803 | 0.0247 |

|             |          |               |         |        |         |        |         |        |         |        |
|-------------|----------|---------------|---------|--------|---------|--------|---------|--------|---------|--------|
| OLIGO_04828 | BF044376 | RAB5B         | 0.6148  | 0.0920 | -0.4904 | 0.1505 | -0.6348 | 0.0266 | -0.5045 | 0.0440 |
| OLIGO_11556 | BF044377 | FSTL1         | -2.4232 | 0.0007 | 2.3378  | 0.0004 | -0.3073 | 0.5803 | -0.7851 | 0.1102 |
| OLIGO_04825 | BF044382 | APXL2         | 0.7992  | 0.2501 | -0.1719 | 0.7844 | 1.1214  | 0.1359 | 0.8781  | 0.2126 |
| OLIGO_09100 | BF044383 | MOV10         | 0.8241  | 0.1038 | -1.0697 | 0.0242 | 0.7512  | 0.0586 | 0.4287  | 0.2171 |
| OLIGO_08890 | BF044384 | 3110050K21Rik | 0.1903  | 0.7224 | -0.1917 | 0.7110 | 1.2169  | 0.0363 | 1.0987  | 0.0494 |
| OLIGO_09040 | BF044386 | CCDC52        | 0.4154  | 0.1357 | 0.1258  | 0.6260 | 0.1745  | 0.4153 | 0.0645  | 0.7268 |
| OLIGO_09242 | BF044391 | SRGAP2        | -0.4090 | 0.6073 | 0.2886  | 0.7040 | 1.3443  | 0.1253 | 0.7932  | 0.2972 |
| OLIGO_04830 | BF044395 | EXT2          | -0.3463 | 0.1330 | 0.4196  | 0.0512 | 0.0079  | 0.9652 | -0.3290 | 0.0381 |
| OLIGO_07016 | BF044396 | IDH2          | -0.7522 | 0.0155 | 1.1533  | 0.0001 | -0.6797 | 0.0057 | -0.3520 | 0.1025 |
| OLIGO_09393 | BF044397 | LOC653754     | -1.1810 | 0.1099 | 1.6162  | 0.0195 | 1.2884  | 0.0288 | 0.3927  | 0.4503 |
| OLIGO_04823 | BF044401 | MAN2A2        | 0.0981  | 0.7305 | -0.0442 | 0.8674 | 0.0531  | 0.8136 | 0.1600  | 0.4138 |
| OLIGO_04822 | BF044402 | Syce2         | 0.5236  | 0.4122 | -0.1061 | 0.8596 | -1.3455 | 0.0076 | -1.2108 | 0.0060 |
| OLIGO_02076 | BF044403 | RAI14         | 0.3631  | 0.3391 | -1.0875 | 0.0023 | 0.1984  | 0.5074 | 0.2377  | 0.3624 |
| OLIGO_02136 | BF044404 | CANX          | 0.6071  | 0.1492 | -0.9441 | 0.0167 | 0.0692  | 0.8337 | -0.0067 | 0.9814 |
| OLIGO_09249 | BF044406 | SFRS11        | -0.0949 | 0.8377 | -0.1133 | 0.7938 | 0.2695  | 0.4589 | -0.0414 | 0.8974 |
| OLIGO_01056 | BF044412 | MTCH2         | 0.8160  | 0.0067 | -0.8668 | 0.0020 | -0.5055 | 0.0328 | -0.1607 | 0.4348 |
| OLIGO_00795 | BF044413 | COMMD7        | -0.3588 | 0.5762 | 0.1884  | 0.7537 | 0.6518  | 0.1955 | 0.0827  | 0.8511 |
| OLIGO_02617 | BF044423 | LOC134147     | 0.1164  | 0.7852 | -0.6474 | 0.1055 | 0.1648  | 0.6231 | -0.4628 | 0.1188 |
| OLIGO_04405 | BF044426 | RSRC1         | 0.3701  | 0.2417 | -0.8187 | 0.0057 | 0.0096  | 0.9695 | -0.0200 | 0.9267 |
| OLIGO_04406 | BF044427 | CEP290        | -0.9943 | 0.3112 | 0.9775  | 0.3070 | 3.0243  | 0.0279 | 2.5189  | 0.0567 |
| OLIGO_04407 | BF044429 | FLJ21687      | 0.1543  | 0.7037 | -0.0703 | 0.8529 | 0.9522  | 0.0029 | 0.5027  | 0.0714 |
| OLIGO_04398 | BF044431 | PBX2          | -0.0208 | 0.9598 | -0.6824 | 0.0769 | 0.0890  | 0.7738 | 0.2732  | 0.3141 |
| OLIGO_08044 | BF044433 | PARL          | 0.1928  | 0.5233 | -0.8059 | 0.0498 | -0.2148 | 0.4560 | -0.0056 | 0.9825 |
| OLIGO_11548 | BF044435 | ISYNA1        | -0.1274 | 0.7692 | -0.3901 | 0.3321 | -0.5554 | 0.1083 | -0.3821 | 0.1991 |
| OLIGO_04402 | BF044437 | CRIM1         | 0.0419  | 0.8891 | 0.3166  | 0.2602 | 0.6155  | 0.0094 | 0.5064  | 0.0138 |
| OLIGO_04400 | BF044444 | EIF2B1        | 0.9679  | 0.0012 | -0.8785 | 0.0016 | 0.2897  | 0.2188 | 0.0499  | 0.8076 |
| OLIGO_04399 | BF044445 | DTNBP1        | 0.5860  | 0.3520 | 0.4428  | 0.4611 | 0.5323  | 0.3534 | 0.2733  | 0.5987 |
| OLIGO_08309 | BF044448 | UMPS          | -0.1371 | 0.7338 | -0.6009 | 0.1115 | -0.1096 | 0.7289 | -0.9427 | 0.0008 |
| OLIGO_04023 | BF044453 | NCBP1         | 0.2519  | 0.6605 | -0.5945 | 0.3013 | -0.1621 | 0.7578 | -0.1329 | 0.7920 |
| OLIGO_08781 | BF044457 | ZNF652        | -0.4550 | 0.0636 | 0.2074  | 0.3614 | -0.3295 | 0.0932 | -0.3592 | 0.0332 |
| OLIGO_04022 | BF044458 | ATXN1         | -1.6045 | 0.0014 | 1.8843  | 0.0001 | 0.8619  | 0.0296 | 0.8240  | 0.0170 |
| OLIGO_06355 | BF044464 | RPL5          | 0.1272  | 0.6326 | -0.0588 | 0.8130 | -0.3220 | 0.1238 | -0.4381 | 0.0169 |
| OLIGO_08777 | BF044467 | TMEM126B      | 0.2540  | 0.5285 | -0.3304 | 0.3807 | -0.0182 | 0.9540 | 0.0863  | 0.7550 |
| OLIGO_06363 | BF044475 | TUG1          | -0.3273 | 0.2425 | 0.3105  | 0.2340 | 0.4199  | 0.0580 | 0.3196  | 0.0971 |

|             |          |               |         |        |         |        |         |        |         |        |
|-------------|----------|---------------|---------|--------|---------|--------|---------|--------|---------|--------|
| OLIGO_06362 | BF044476 | RAB25         | -0.4751 | 0.5995 | 0.3730  | 0.6676 | 2.7994  | 0.0080 | 1.9514  | 0.0374 |
| OLIGO_09958 | BF044492 | ZNF655        | 0.5727  | 0.4124 | -1.2616 | 0.0225 | 0.2439  | 0.4782 | 0.1915  | 0.5326 |
| OLIGO_04327 | BF044502 | SLC20A1       | 0.7027  | 0.1464 | 0.0093  | 0.9837 | -0.6078 | 0.1106 | -0.4907 | 0.1362 |
| OLIGO_04328 | BF044503 | TMEM12        | 0.1166  | 0.7994 | 0.1222  | 0.7756 | -0.5750 | 0.1246 | -0.6872 | 0.0333 |
| OLIGO_04335 | BF044511 | MGC16372      | -0.4492 | 0.2369 | -0.1616 | 0.6242 | -0.1212 | 0.6334 | -0.2346 | 0.2906 |
| OLIGO_11515 | BF044514 | OCLN          | 1.3316  | 0.0657 | -2.3224 | 0.0101 | 0.2644  | 0.6388 | 0.7232  | 0.2387 |
| OLIGO_04330 | BF044515 | SSBP1         | 0.1973  | 0.5783 | -0.7264 | 0.0290 | 0.0310  | 0.9112 | -0.1387 | 0.5689 |
| OLIGO_04333 | BF044520 | LZIC          | 0.6165  | 0.1945 | -0.2868 | 0.4940 | -0.2464 | 0.5374 | -0.0113 | 0.9750 |
| OLIGO_04429 | BF044527 | TRIM25        | 0.1095  | 0.7456 | 1.2484  | 0.0001 | -0.7024 | 0.0092 | 0.0507  | 0.8265 |
| OLIGO_07856 | BF044530 | EPN1          | 0.0081  | 0.9772 | 0.3212  | 0.2269 | 0.1232  | 0.5805 | 0.1892  | 0.3371 |
| OLIGO_07693 | BF044531 | CBX1          | -1.2015 | 0.0005 | 0.5142  | 0.1102 | 0.1662  | 0.5411 | -0.3155 | 0.1833 |
| OLIGO_11285 | BF044532 | SCD           | -0.3857 | 0.4087 | 0.4534  | 0.2983 | -1.5728 | 0.0000 | -1.7169 | 0.0000 |
| OLIGO_04322 | BF044536 | 2610001J05Rik | -0.5526 | 0.4236 | 0.7262  | 0.2610 | 2.7086  | 0.0000 | 2.2510  | 0.0000 |
| OLIGO_07647 | BF044539 | LOC525795     | -0.8636 | 0.0047 | 0.2031  | 0.4754 | -0.4234 | 0.0762 | -0.1025 | 0.6233 |
| OLIGO_04326 | BF044545 | LOC514660     | 0.2474  | 0.6770 | -0.0349 | 0.9499 | -0.3044 | 0.5138 | -0.3347 | 0.4167 |
| OLIGO_09112 | BF044546 | KLHDC2        | 0.1288  | 0.7907 | -0.6181 | 0.1704 | 0.0808  | 0.8305 | 0.2499  | 0.4497 |
| OLIGO_06524 | BF044548 | RPN2          | -0.4436 | 0.6067 | 0.6234  | 0.4393 | 1.2674  | 0.0612 | 1.3929  | 0.0189 |
| OLIGO_09106 | BF044555 | SAP30L        | -0.0391 | 0.9572 | 0.9770  | 0.1658 | 1.0177  | 0.0743 | 0.9808  | 0.0525 |
| OLIGO_04323 | BF044556 | OSBPL10       | 0.2598  | 0.6637 | -0.3821 | 0.4818 | 1.2860  | 0.0028 | 0.7668  | 0.0408 |
| OLIGO_04019 | BF044560 | PLCB4         | 0.3172  | 0.4782 | -0.4123 | 0.3441 | 0.8560  | 0.0687 | 0.6126  | 0.1524 |
| OLIGO_04021 | BF044563 | ALOX5AP       | 0.3171  | 0.4804 | -0.4099 | 0.3514 | -0.1840 | 0.6571 | 0.0408  | 0.9180 |
| OLIGO_10737 | BF044566 | ATP6V0A1      | -0.9782 | 0.0755 | 1.1376  | 0.0269 | 0.3034  | 0.4919 | 0.2329  | 0.5422 |
| OLIGO_04025 | BF044574 | BCL6B         | 0.1105  | 0.8528 | 0.0890  | 0.8774 | -0.1751 | 0.7568 | 0.7279  | 0.2170 |
| OLIGO_11206 | BF044582 | DUS3L         | 0.7491  | 0.0056 | -0.4349 | 0.0826 | 0.2611  | 0.2219 | -0.3621 | 0.0555 |
| OLIGO_01414 | BF044584 | SETMAR        | -0.0895 | 0.7035 | -0.3005 | 0.1708 | -0.3994 | 0.0318 | -0.1529 | 0.3441 |
| OLIGO_06272 | BF044586 | NFKBIB        | 0.4577  | 0.2930 | -0.2914 | 0.4767 | 0.3168  | 0.4237 | 0.2574  | 0.4928 |
| OLIGO_11434 | BF044606 | LOXL1         | -1.1262 | 0.0891 | 2.0949  | 0.0336 | -0.9715 | 0.1902 | -0.9394 | 0.1974 |
| OLIGO_04761 | BF044609 | C1orf210      | 0.4382  | 0.5442 | -0.0964 | 0.8916 | 0.9535  | 0.1798 | 0.6212  | 0.3673 |
| OLIGO_04765 | BF044618 | RGS12         | -0.4411 | 0.2161 | 0.0916  | 0.7858 | 0.3934  | 0.1598 | 0.1712  | 0.4836 |
| OLIGO_08906 | BF044625 | SLC4A3        | 0.7392  | 0.0155 | -1.0929 | 0.0001 | 0.4340  | 0.0722 | 0.1673  | 0.4232 |
| OLIGO_04764 | BF044628 | CDK7          | 0.7723  | 0.0952 | -1.1760 | 0.0067 | 1.3625  | 0.0002 | 1.3694  | 0.0000 |
| OLIGO_09312 | BF044630 | PABPC4        | 0.5999  | 0.2681 | -0.1078 | 0.8314 | -0.0620 | 0.8838 | -0.0326 | 0.9301 |
| OLIGO_04756 | BF044631 | FAM8A1        | -0.2544 | 0.4846 | 0.5313  | 0.1190 | -0.4983 | 0.0837 | -0.1897 | 0.4484 |
| OLIGO_09359 | BF044634 | MRPL55        | 0.4007  | 0.2469 | -0.7366 | 0.0232 | -0.1612 | 0.5519 | -0.0745 | 0.7535 |

|             |          |           |         |        |         |        |         |        |         |        |
|-------------|----------|-----------|---------|--------|---------|--------|---------|--------|---------|--------|
| OLIGO_04759 | BF044638 | KLC2      | 0.4211  | 0.2060 | -0.2272 | 0.4655 | -0.2803 | 0.2827 | -0.2226 | 0.3298 |
| OLIGO_04760 | BF044640 | PTPN2     | 0.5888  | 0.0289 | -0.7941 | 0.0016 | 0.2337  | 0.2720 | 0.1359  | 0.4614 |
| OLIGO_07307 | BF044643 | LOC533209 | -0.1698 | 0.7060 | 0.7994  | 0.0595 | 0.0373  | 0.9159 | 0.1506  | 0.6292 |
| OLIGO_06408 | BF044647 | GTF2H1    | 0.6469  | 0.1615 | -1.8396 | 0.0000 | 0.2774  | 0.4431 | 0.7473  | 0.0186 |
| OLIGO_08693 | BF044651 | SURF2     | -0.0934 | 0.8003 | 0.1043  | 0.7626 | 0.1539  | 0.5948 | 0.0544  | 0.8298 |
| OLIGO_04755 | BF044664 | TMEM102   | -1.1325 | 0.3966 | -0.2429 | 0.8177 | 1.0116  | 0.2947 | 0.8534  | 0.3569 |
| OLIGO_09360 | BF044667 | PPFIA1    | 0.5341  | 0.1620 | -0.3921 | 0.2713 | 0.6773  | 0.0244 | 0.8132  | 0.0020 |
| OLIGO_04758 | BF044669 | LOC651894 | -0.2176 | 0.5444 | -0.2874 | 0.3979 | 0.6386  | 0.0233 | 0.2284  | 0.3528 |
| OLIGO_04757 | BF044671 | SHC1      | -0.0339 | 0.8983 | -0.1793 | 0.4684 | -0.0533 | 0.7984 | -0.1172 | 0.5202 |
| OLIGO_04766 | BF044672 | MAT2A     | 0.0166  | 0.9520 | -0.1665 | 0.5195 | -0.7176 | 0.0010 | -0.4369 | 0.0216 |
| OLIGO_09963 | BF044673 | PUS1      | 0.4152  | 0.3358 | 0.4705  | 0.2560 | -0.3533 | 0.2951 | -0.1768 | 0.5569 |
| OLIGO_09054 | BF044688 | Mcf2l     | 0.4504  | 0.2259 | 0.2291  | 0.5099 | 0.2105  | 0.4698 | 0.1278  | 0.6162 |
| OLIGO_04261 | BF044691 | FLJ20272  | 0.1891  | 0.4834 | -0.1594 | 0.5236 | 0.0312  | 0.8843 | -0.2604 | 0.1597 |
| OLIGO_07062 | BF044693 | FIS1      | 0.4679  | 0.4770 | -0.2222 | 0.7196 | -0.2999 | 0.5609 | -0.3916 | 0.3875 |
| OLIGO_09057 | BF044698 | CSRP2BP   | 0.4314  | 0.2402 | 0.1574  | 0.6517 | -0.0320 | 0.9119 | -0.0544 | 0.8291 |
| OLIGO_08737 | BF044699 | FEM1B     | 0.2366  | 0.7117 | -0.3970 | 0.5154 | 0.4311  | 0.3806 | 0.3329  | 0.4392 |
| OLIGO_10539 | BF044704 | PCMT1     | 0.0593  | 0.9063 | -0.4289 | 0.3631 | -0.6256 | 0.1138 | -0.7421 | 0.0323 |
| OLIGO_06255 | BF044715 | ITGA3     | -0.3765 | 0.4281 | 0.3567  | 0.4222 | 0.4060  | 0.2755 | 0.3661  | 0.2615 |
| OLIGO_09138 | BF044720 | EPS8L2    | 0.1807  | 0.7654 | -0.8111 | 0.2213 | 0.0759  | 0.8847 | 0.0364  | 0.9408 |
| OLIGO_09997 | BF044726 | TDG       | -0.0617 | 0.8833 | -0.1348 | 0.7410 | -0.5303 | 0.1969 | -0.1219 | 0.7417 |
| OLIGO_06251 | BF044727 | MED4      | 0.0942  | 0.7312 | -0.0543 | 0.8321 | -0.4613 | 0.0330 | -0.1877 | 0.3194 |
| OLIGO_06279 | BF044731 | DNAJA2    | 0.9386  | 0.0003 | -0.9715 | 0.0001 | -0.0338 | 0.8687 | -0.2200 | 0.2123 |
| OLIGO_10918 | BF044734 | CKAP5     | -0.3328 | 0.3471 | -0.0664 | 0.8411 | -0.6016 | 0.0305 | -0.5908 | 0.0153 |
| OLIGO_06280 | BF044735 | CTDSPL2   | -0.3488 | 0.2126 | 0.5201  | 0.0472 | -0.3080 | 0.1603 | -0.2480 | 0.1964 |
| OLIGO_02563 | BF044738 | PSMC4     | 0.4368  | 0.1672 | -0.6123 | 0.0378 | -0.5295 | 0.0347 | -0.5258 | 0.0158 |
| OLIGO_04000 | BF044741 | PLN       | -0.3979 | 0.3336 | 0.5833  | 0.1299 | -0.7218 | 0.0261 | -0.0819 | 0.7767 |
| OLIGO_06270 | BF044742 | RECQL5    | 0.2429  | 0.4602 | -0.1063 | 0.7295 | 0.3825  | 0.1385 | 0.1628  | 0.4706 |
| OLIGO_03996 | BF044744 | NFKBIZ    | -0.1406 | 0.8345 | 0.3130  | 0.6327 | 0.2157  | 0.7316 | 0.0586  | 0.9226 |
| OLIGO_10409 | BF044746 | RBM3      | -0.7659 | 0.0890 | 0.9686  | 0.0217 | -1.1645 | 0.0010 | -1.1110 | 0.0004 |
| OLIGO_06233 | BF044748 | PTPRG     | -0.2697 | 0.5745 | 0.0962  | 0.8292 | 0.6413  | 0.0866 | 0.4085  | 0.2165 |
| OLIGO_06232 | BF044749 | LOC530325 | -0.0345 | 0.9638 | -0.1421 | 0.8654 | 0.7891  | 0.2789 | 0.3264  | 0.6061 |
| OLIGO_10941 | BF044751 | UNC119    | 0.3484  | 0.3226 | -0.4550 | 0.1653 | -0.5418 | 0.0527 | -0.1875 | 0.4437 |
| OLIGO_11288 | BF044752 | CYBA      | -0.5229 | 0.0964 | 0.7053  | 0.0164 | -0.9887 | 0.0001 | -0.8833 | 0.0001 |
| OLIGO_06244 | BF044757 | NUP107    | 0.2006  | 0.6066 | -0.7949 | 0.0286 | -0.0162 | 0.9583 | -0.1708 | 0.5233 |

|             |          |           |         |        |         |        |         |        |         |        |
|-------------|----------|-----------|---------|--------|---------|--------|---------|--------|---------|--------|
| OLIGO_06243 | BF044762 | AIM1      | -0.1889 | 0.5737 | 0.2726  | 0.3835 | 0.7293  | 0.0063 | 0.5686  | 0.0153 |
| OLIGO_07254 | BF044765 | SNW1      | 0.3244  | 0.1983 | -0.4475 | 0.0580 | -0.4076 | 0.0395 | -0.2065 | 0.2327 |
| OLIGO_06289 | BF044767 | MRPS18A   | -0.1223 | 0.7000 | -0.1591 | 0.5882 | 0.1505  | 0.5380 | 0.0507  | 0.8128 |
| OLIGO_11051 | BF044769 | SON       | 0.2069  | 0.4920 | -0.3574 | 0.2025 | -0.3710 | 0.1212 | -0.3731 | 0.0832 |
| OLIGO_06257 | BF044772 | CAMK2D    | 0.0977  | 0.8039 | 0.2847  | 0.4411 | -0.8313 | 0.0075 | -0.8160 | 0.0027 |
| OLIGO_03217 | BF044774 | GALNT11   | 0.4443  | 0.1514 | -0.9422 | 0.0012 | 0.2773  | 0.2530 | 0.1345  | 0.5264 |
| OLIGO_04711 | BF044776 | UBE2A     | 0.0371  | 0.9292 | -0.1091 | 0.7834 | 0.1360  | 0.7028 | 0.1035  | 0.7546 |
| OLIGO_04712 | BF044778 | TMM22     | 0.2464  | 0.4543 | -0.6487 | 0.0990 | 0.6069  | 0.1566 | 0.0342  | 0.8945 |
| OLIGO_04718 | BF044783 | FLJ10241  | 0.7651  | 0.1302 | -0.4032 | 0.3866 | -0.1028 | 0.7719 | -0.1890 | 0.5427 |
| OLIGO_08111 | BF044787 | DERL1     | 1.4580  | 0.0155 | -1.3442 | 0.0216 | 0.2064  | 0.6397 | 0.1669  | 0.6907 |
| OLIGO_04715 | BF044789 | FAM82C    | 0.0621  | 0.8703 | 0.1168  | 0.7427 | -0.1403 | 0.6378 | -0.1352 | 0.6044 |
| OLIGO_04717 | BF044791 | ZNF259    | 1.2629  | 0.0002 | -0.9935 | 0.0016 | -0.3986 | 0.1299 | -0.2384 | 0.3005 |
| OLIGO_11557 | BF044799 | TAF11     | 0.4050  | 0.1825 | -0.9836 | 0.0005 | -0.0045 | 0.9849 | -0.1428 | 0.4934 |
| OLIGO_04709 | BF044804 | SOX6      | -1.1903 | 0.0329 | 1.0743  | 0.0333 | 1.1892  | 0.0044 | 0.3283  | 0.3587 |
| OLIGO_09337 | BF044805 | SMURF1    | 0.2698  | 0.4007 | 0.2751  | 0.3595 | -0.2613 | 0.2991 | 0.0064  | 0.9766 |
| OLIGO_04710 | BF044806 | RBM19     | -0.1293 | 0.8161 | -0.0785 | 0.8801 | 0.2187  | 0.6158 | -0.1614 | 0.6723 |
| OLIGO_04707 | BF044809 | LOC155060 | 0.2871  | 0.6548 | -0.1250 | 0.8350 | 0.1018  | 0.8397 | 0.1587  | 0.7186 |
| OLIGO_04719 | BF044815 | BZRP      | -0.1661 | 0.7186 | 1.1157  | 0.0100 | -1.4778 | 0.0001 | -1.2165 | 0.0001 |
| OLIGO_07211 | BF044816 | SFRS6     | -0.1611 | 0.6390 | -0.0230 | 0.9431 | -0.8578 | 0.0015 | -0.5382 | 0.0228 |
| OLIGO_04713 | BF044819 | C1orf121  | -0.0171 | 0.9705 | -0.5640 | 0.1939 | 0.3926  | 0.2904 | 0.0406  | 0.9036 |
| OLIGO_07955 | BF044821 | RNASEH2A  | -0.0590 | 0.8795 | 0.0134  | 0.9705 | -0.7067 | 0.0241 | -0.5386 | 0.0452 |
| OLIGO_04714 | BF044825 | POMGNT1   | 0.1121  | 0.8320 | 0.1972  | 0.6899 | 0.0878  | 0.8321 | -0.1122 | 0.7569 |
| OLIGO_04705 | BF044826 | GPR89A    | 0.8627  | 0.0070 | -0.3382 | 0.2554 | 0.1908  | 0.4466 | 0.3288  | 0.1334 |
| OLIGO_07636 | BF044830 | CHD8      | -0.2687 | 0.3309 | 0.1335  | 0.6033 | -0.2267 | 0.3004 | 0.0490  | 0.7985 |
| OLIGO_04266 | BF044835 | DIP2B     | 0.8392  | 0.0194 | -0.5526 | 0.0989 | 0.4247  | 0.1132 | 0.6748  | 0.0037 |
| OLIGO_09060 | BF044836 | Sharnin   | 0.0829  | 0.8533 | 0.3371  | 0.4429 | 0.2089  | 0.6052 | 0.0992  | 0.7930 |
| OLIGO_07568 | BF044843 | PRKCDBP   | -0.2459 | 0.7018 | -0.0117 | 0.9851 | 0.3516  | 0.5695 | 0.5586  | 0.3567 |
| OLIGO_04265 | BF044848 | UBE2V2    | 0.8537  | 0.0028 | -0.8264 | 0.0019 | -0.5899 | 0.0087 | -0.1511 | 0.4383 |
| OLIGO_04263 | BF044850 | PIGK      | 0.2174  | 0.5245 | 0.0148  | 0.9632 | 0.3268  | 0.2253 | 0.6412  | 0.0072 |
| OLIGO_05093 | BF044851 | ALKBH6    | -0.3868 | 0.2707 | 0.3791  | 0.2485 | -0.4516 | 0.1014 | -0.4636 | 0.0549 |
| OLIGO_04264 | BF044853 | C6orf1    | 0.3696  | 0.1797 | 0.1343  | 0.6019 | 0.1147  | 0.5949 | 0.0130  | 0.9450 |
| OLIGO_07219 | BF044875 | FBLN5     | 0.6017  | 0.3178 | 0.0604  | 0.9145 | -1.0022 | 0.0365 | -0.8125 | 0.0499 |
| OLIGO_09295 | BF044876 | G6PC3     | 0.1416  | 0.7470 | -0.2643 | 0.5199 | -0.0381 | 0.9118 | -0.3078 | 0.3071 |
| OLIGO_00522 | BF044877 | USP19     | -0.0650 | 0.8286 | 0.2222  | 0.4280 | -0.0967 | 0.6823 | -0.3474 | 0.0927 |

|             |          |           |         |        |         |        |         |        |         |        |
|-------------|----------|-----------|---------|--------|---------|--------|---------|--------|---------|--------|
| OLIGO_04632 | BF044878 | SIPA1     | -0.6848 | 0.1636 | 1.0077  | 0.0287 | 0.4061  | 0.2917 | 0.4437  | 0.1883 |
| OLIGO_04641 | BF044881 | LOC642104 | 0.2841  | 0.4106 | -0.4491 | 0.2169 | -0.2249 | 0.4834 | -0.1634 | 0.5890 |
| OLIGO_04222 | BF044893 | SERPINE1  | -0.1384 | 0.8679 | 0.1172  | 0.8803 | 0.0917  | 0.8900 | 0.2521  | 0.6602 |
| OLIGO_09015 | BF044894 | HEATR3    | -0.0372 | 0.9097 | 0.6589  | 0.0320 | 0.3934  | 0.1294 | 0.7260  | 0.0016 |
| OLIGO_00833 | BF044900 | MAML1     | -0.4628 | 0.1329 | 0.3689  | 0.2002 | -0.3655 | 0.1300 | -0.1590 | 0.4513 |
| OLIGO_04218 | BF044906 | KLHL15    | -0.0749 | 0.8739 | -0.4243 | 0.3398 | 0.5368  | 0.1506 | 0.3576  | 0.2709 |
| OLIGO_09010 | BF044910 | SIN3B     | 0.0985  | 0.8665 | -0.1274 | 0.8158 | 0.2585  | 0.5703 | -0.0566 | 0.8871 |
| OLIGO_10873 | BF044922 | UROCI     | -1.6132 | 0.0001 | 1.3882  | 0.0004 | 0.0509  | 0.8773 | -0.2332 | 0.4205 |
| OLIGO_08132 | BF044923 | LOC647535 | 0.7064  | 0.1119 | -0.0383 | 0.9259 | 0.4018  | 0.2424 | 0.3049  | 0.3078 |
| OLIGO_08125 | BF044924 | DNAJC4    | 0.3101  | 0.3721 | -0.9577 | 0.0033 | 0.2643  | 0.3318 | 0.6674  | 0.0055 |
| OLIGO_04220 | BF044931 | PLCXD2    | 0.8574  | 0.1693 | 0.0479  | 0.9355 | -0.3461 | 0.4423 | -0.2172 | 0.5829 |
| OLIGO_04221 | BF044934 | MTERFD3   | -0.9247 | 0.0729 | 0.6980  | 0.1451 | 0.3297  | 0.4042 | 0.2537  | 0.4619 |
| OLIGO_09014 | BF044936 | RTN4IP1   | 0.3581  | 0.2877 | 0.2360  | 0.4539 | -0.1732 | 0.5551 | -0.1832 | 0.5170 |
| OLIGO_07414 | BF044937 | ENSA      | -0.6260 | 0.1326 | 0.7776  | 0.0460 | -0.0903 | 0.7816 | -0.2948 | 0.3016 |
| OLIGO_11491 | BF044939 | TSPYL6    | 0.3109  | 0.4326 | -0.5583 | 0.1637 | -0.4893 | 0.1988 | -0.2763 | 0.4239 |
| OLIGO_09000 | BF044941 | C2orf30   | -1.2855 | 0.0455 | 0.5261  | 0.3815 | 2.2622  | 0.0000 | 2.0989  | 0.0000 |
| OLIGO_09008 | BF044943 | ZNF407    | 0.2245  | 0.6927 | 0.1016  | 0.8497 | 0.7076  | 0.1051 | 0.4311  | 0.2581 |
| OLIGO_04223 | BF044949 | BNIP1     | 0.0810  | 0.9153 | -0.2689 | 0.7074 | 0.6024  | 0.3122 | 0.3379  | 0.5171 |
| OLIGO_11489 | BF044952 | PPP1R15B  | 1.0815  | 0.0006 | -0.4643 | 0.1064 | 0.2027  | 0.4008 | 0.0330  | 0.8758 |
| OLIGO_08115 | BF044958 | FAM98C    | -0.1406 | 0.8278 | 0.1909  | 0.7521 | -1.2247 | 0.0159 | -0.7649 | 0.0850 |
| OLIGO_04144 | BF044966 | DDX41     | 0.0107  | 0.9798 | 0.3493  | 0.3774 | -0.0234 | 0.9436 | -0.0395 | 0.8917 |
| OLIGO_08765 | BF044967 | AGGF1     | 0.0448  | 0.8697 | -0.3653 | 0.1524 | 0.4170  | 0.0526 | 0.2537  | 0.1766 |
| OLIGO_11481 | BF044980 | ACSL1     | 1.0197  | 0.0051 | -0.8005 | 0.0186 | 0.1418  | 0.6178 | 0.5458  | 0.0287 |
| OLIGO_11436 | BF044982 | INPP5D    | -0.4150 | 0.3280 | 1.4270  | 0.0005 | -0.0841 | 0.7999 | -0.0097 | 0.9734 |
| OLIGO_08955 | BF044995 | SH3BGR    | -0.8035 | 0.2741 | 0.7169  | 0.3156 | -0.5581 | 0.4221 | -0.1452 | 0.8277 |
| OLIGO_04642 | BF044999 | MGC9850   | -0.4211 | 0.1260 | 0.4028  | 0.1153 | -0.4560 | 0.0368 | -0.2976 | 0.1155 |
| OLIGO_08858 | BF045001 | BAIAP2L1  | 1.4468  | 0.0350 | -1.4821 | 0.0320 | 1.8648  | 0.0279 | 1.6067  | 0.0616 |
| OLIGO_04640 | BF045004 | KIAA1279  | -0.1260 | 0.5811 | 0.1680  | 0.4298 | -0.1422 | 0.4298 | -0.2251 | 0.1519 |
| OLIGO_04639 | BF045005 | NCF4      | 0.4667  | 0.5160 | -0.2549 | 0.7084 | 0.3499  | 0.5696 | 0.3693  | 0.5229 |
| OLIGO_03471 | BF045006 | ATG9B     | -0.4006 | 0.4628 | 1.2163  | 0.0175 | 0.4849  | 0.2636 | 0.3273  | 0.3863 |
| OLIGO_04635 | BF045014 | VPS13C    | 0.5963  | 0.1259 | -0.2130 | 0.5544 | 0.5025  | 0.0940 | 0.3232  | 0.2181 |
| OLIGO_04637 | BF045022 | INOC1     | 0.0311  | 0.9109 | -0.0348 | 0.8932 | 0.1629  | 0.4557 | -0.0500 | 0.7933 |
| OLIGO_11274 | BF045027 | ARS2      | -0.0509 | 0.8133 | 0.0706  | 0.7242 | -0.2927 | 0.0869 | -0.2064 | 0.1635 |
| OLIGO_10717 | BF045031 | KLHL22    | -0.8622 | 0.0250 | 0.7650  | 0.0334 | 0.5001  | 0.0966 | 0.5250  | 0.0465 |

|             |          |              |         |        |         |        |         |        |         |        |
|-------------|----------|--------------|---------|--------|---------|--------|---------|--------|---------|--------|
| OLIGO_10349 | BF045042 | LOC651825    | -0.6986 | 0.3720 | 0.3610  | 0.6217 | -0.7907 | 0.1975 | -1.2583 | 0.0194 |
| OLIGO_04633 | BF045043 | EXOC8        | 0.1825  | 0.7136 | -0.1071 | 0.8178 | 0.2031  | 0.6022 | 0.1489  | 0.6624 |
| OLIGO_11265 | BF045045 | MGC2749      | 0.1681  | 0.5550 | 0.0094  | 0.9718 | 0.0828  | 0.7115 | 0.1099  | 0.5771 |
| OLIGO_04631 | BF045047 | RBM35A       | 0.6086  | 0.2414 | -0.9149 | 0.0615 | 1.1266  | 0.0058 | 0.6643  | 0.0626 |
| OLIGO_04629 | BF045049 | USP39        | 0.1085  | 0.7707 | -0.1629 | 0.6397 | 0.0442  | 0.8796 | 0.0620  | 0.8081 |
| OLIGO_08708 | BF045050 | LPGAT1       | 0.4811  | 0.2112 | -0.2624 | 0.4656 | 0.0463  | 0.8780 | 0.1650  | 0.5333 |
| OLIGO_09275 | BF045054 | MAPKAPK3     | 0.0893  | 0.8062 | -0.2824 | 0.4063 | -0.1085 | 0.7011 | 0.2374  | 0.3379 |
| OLIGO_07721 | BF045055 | SETDB1       | -0.1790 | 0.3635 | 0.2617  | 0.1521 | -0.2926 | 0.0621 | -0.1793 | 0.1844 |
| OLIGO_07032 | BF045056 | PTD008       | -0.0111 | 0.9701 | -0.0126 | 0.9637 | 0.3425  | 0.1437 | 0.1090  | 0.5927 |
| OLIGO_04634 | BF045060 | OSBP         | 0.5617  | 0.1986 | 0.3478  | 0.3945 | -0.4131 | 0.2277 | -0.1954 | 0.5142 |
| OLIGO_04636 | BF045061 | MGC42174     | -0.0870 | 0.8368 | 0.0976  | 0.8050 | 0.2146  | 0.5171 | 0.2329  | 0.4219 |
| OLIGO_11756 | BF045063 | Ells1        | -0.1729 | 0.6797 | 1.1428  | 0.0035 | -1.4378 | 0.0000 | -1.1510 | 0.0001 |
| OLIGO_04647 | BF045064 | LRRC1        | 0.3199  | 0.4681 | -0.6425 | 0.1179 | 0.6255  | 0.0664 | 0.4995  | 0.0934 |
| OLIGO_04651 | BF045073 | DKFZp547C195 | 0.0838  | 0.9041 | -0.3175 | 0.6416 | -0.1400 | 0.8344 | -0.0460 | 0.9439 |
| OLIGO_08995 | BF045074 | MED8         | 0.4130  | 0.2403 | -0.9273 | 0.0050 | 0.7386  | 0.0077 | 0.5953  | 0.0140 |
| OLIGO_09037 | BF045076 | LOC507418    | 0.4469  | 0.2517 | -0.6200 | 0.0894 | 0.1605  | 0.6075 | -0.3417 | 0.2086 |
| OLIGO_07779 | BF045083 | CTDSP1       | -0.7021 | 0.0582 | 1.5453  | 0.0000 | -0.0916 | 0.7542 | 0.2061  | 0.4181 |
| OLIGO_10900 | BF045084 | TTYH2        | -0.0245 | 0.9488 | -0.0493 | 0.8926 | -0.9698 | 0.0754 | -1.0479 | 0.0926 |
| OLIGO_04643 | BF045086 | RNMT         | 0.8726  | 0.0042 | -1.5128 | 0.0000 | -0.0752 | 0.7547 | 0.1089  | 0.5994 |
| OLIGO_03251 | BF045103 | ARPP-19      | 0.1448  | 0.5922 | -0.1517 | 0.5452 | -0.5010 | 0.0201 | -0.3326 | 0.0734 |
| OLIGO_04644 | BF045106 | LARP2        | -0.0871 | 0.8181 | 0.3053  | 0.3888 | -0.4326 | 0.1454 | -0.4362 | 0.0936 |
| OLIGO_04650 | BF045107 | PCGF1        | -0.3196 | 0.8086 | -0.0981 | 0.9386 | 1.9000  | 0.1360 | 1.5241  | 0.2167 |
| OLIGO_04649 | BF045108 | PRPS2        | 0.8331  | 0.0149 | -0.7960 | 0.0126 | -0.3629 | 0.1780 | -0.5174 | 0.0295 |
| OLIGO_04648 | BF045110 | BMP6         | -0.2696 | 0.5817 | 0.1868  | 0.6896 | 0.8036  | 0.1197 | 0.4424  | 0.3191 |
| OLIGO_08954 | BF045119 | TTMA         | 0.5508  | 0.2491 | -0.3113 | 0.4860 | 0.3350  | 0.3710 | 0.1363  | 0.6774 |
| OLIGO_04153 | BF045124 | INPP4B       | 0.6311  | 0.4430 | -1.2501 | 0.1494 | 2.1494  | 0.0498 | 1.1937  | 0.1770 |
| OLIGO_08953 | BF045125 | ZCCHC14      | -1.1585 | 0.0417 | 1.2172  | 0.0222 | 0.4466  | 0.3171 | -0.0334 | 0.9329 |
| OLIGO_04150 | BF045129 | MSL3L1       | 0.6477  | 0.3877 | -0.4432 | 0.5384 | -0.4381 | 0.5296 | -0.4050 | 0.5451 |
| OLIGO_04157 | BF045133 | BNIP3L       | -1.1088 | 0.0031 | 1.0841  | 0.0020 | -1.0215 | 0.0006 | -0.3745 | 0.1445 |
| OLIGO_04156 | BF045134 | IPO11        | -0.2140 | 0.3960 | 0.0488  | 0.8352 | 0.1974  | 0.3230 | 0.3811  | 0.0302 |
| OLIGO_04158 | BF045137 | SLC39A8      | -0.7564 | 0.0668 | 0.7934  | 0.0394 | -1.8484 | 0.0000 | -1.4200 | 0.0000 |
| OLIGO_04154 | BF045140 | FGFR1OP      | -0.3193 | 0.2498 | 0.3661  | 0.1567 | -0.2037 | 0.3528 | 0.0313  | 0.8697 |
| OLIGO_04155 | BF045143 | ANKRD49      | 1.0508  | 0.0038 | -1.3232 | 0.0001 | 0.4755  | 0.0954 | 0.8870  | 0.0004 |
| OLIGO_11332 | BF045148 | LOC509040    | -0.9648 | 0.1456 | 1.2636  | 0.0430 | 2.0961  | 0.0001 | 2.0370  | 0.0000 |

|             |          |          |         |        |         |        |         |        |         |        |
|-------------|----------|----------|---------|--------|---------|--------|---------|--------|---------|--------|
| OLIGO_04145 | BF045150 | TBL1XR1  | -0.0478 | 0.8848 | 0.6145  | 0.0468 | -0.7873 | 0.0024 | -0.3062 | 0.1764 |
| OLIGO_04147 | BF045152 | PDGFC    | -1.8452 | 0.0000 | 1.7586  | 0.0000 | -0.4016 | 0.2561 | -0.0857 | 0.7810 |
| OLIGO_11323 | BF045153 | RANBP9   | 0.0727  | 0.8606 | -0.2694 | 0.4867 | -0.5403 | 0.1000 | -0.2272 | 0.4301 |
| OLIGO_05071 | BF045161 | NDUFB7   | 0.2170  | 0.6725 | -0.7823 | 0.1036 | 0.1689  | 0.6745 | 0.0600  | 0.8647 |
| OLIGO_09196 | BF045165 | C12orf29 | 1.0896  | 0.0004 | -1.3076 | 0.0000 | -0.2787 | 0.2419 | -0.0860 | 0.6787 |
| OLIGO_05068 | BF045166 | MDM2     | 0.0821  | 0.8921 | -0.8242 | 0.1929 | 0.9324  | 0.1514 | 0.8634  | 0.1841 |
| OLIGO_00040 | BF045167 | POMT1    | 0.3973  | 0.4587 | -0.3417 | 0.4956 | -0.3776 | 0.3689 | -0.5432 | 0.1401 |
| OLIGO_05069 | BF045169 | AQR      | 0.0280  | 0.9231 | -0.2667 | 0.3257 | 0.2250  | 0.3224 | 0.1585  | 0.4257 |
| OLIGO_09490 | BF045171 | AHCTF1   | 0.7793  | 0.0396 | -0.4891 | 0.1674 | 0.0285  | 0.9250 | 0.3136  | 0.2293 |
| OLIGO_05073 | BF045177 | C2       | .       | .      | -0.1236 | 0.9225 | 0.6828  | 0.0957 | 0.5945  | 0.1007 |
| OLIGO_03099 | BF045182 | BCL10    | 0.3712  | 0.1589 | -0.1366 | 0.5769 | -0.4822 | 0.0211 | -0.1647 | 0.3627 |
| OLIGO_01428 | BF045189 | NOTCH1   | -1.5304 | 0.0000 | 2.4541  | 0.0000 | -0.2726 | 0.3432 | -0.3808 | 0.1229 |
| OLIGO_08925 | BF045193 | NDUFS4   | -0.8396 | 0.1367 | 0.5042  | 0.3390 | 0.6773  | 0.1290 | 0.0455  | 0.9065 |
| OLIGO_05064 | BF045204 | EP300    | 0.6979  | 0.2108 | 0.7753  | 0.1698 | -0.0164 | 0.9636 | -0.1617 | 0.6065 |
| OLIGO_11218 | BF045206 | VTI1A    | -0.4858 | 0.1936 | 0.5449  | 0.1184 | -1.0025 | 0.0007 | -1.1592 | 0.0000 |
| OLIGO_10428 | BF045207 | FBXL11   | 1.5438  | 0.0002 | -1.0637 | 0.0062 | -0.2967 | 0.3600 | -0.2363 | 0.4050 |
| OLIGO_09160 | BF045217 | CYB5R4   | 0.0130  | 0.9780 | -0.2917 | 0.5072 | 0.5068  | 0.1714 | 0.1523  | 0.6450 |
| OLIGO_05063 | BF045230 | SLC35A2  | 0.4098  | 0.1769 | 0.0426  | 0.8806 | 0.1368  | 0.5649 | -0.0528 | 0.7996 |
| OLIGO_09506 | BF045231 | ZADH1    | 0.5084  | 0.0905 | -0.4247 | 0.1305 | 0.4497  | 0.0566 | 0.4482  | 0.0317 |
| OLIGO_10763 | BF045235 | MCM4     | -0.3505 | 0.2628 | 0.3679  | 0.2077 | -0.3295 | 0.1819 | -0.6454 | 0.0028 |
| OLIGO_07258 | BF045237 | DFFB     | -0.1530 | 0.7349 | 0.0810  | 0.8479 | -0.7285 | 0.0401 | -0.6800 | 0.0287 |
| OLIGO_11613 | BF045239 | C12orf44 | 0.1927  | 0.5994 | -0.6691 | 0.0516 | 0.7860  | 0.0065 | 0.1838  | 0.4689 |
| OLIGO_02351 | BF045248 | C1orf52  | 0.2822  | 0.2890 | -0.6060 | 0.0152 | -0.3039 | 0.1489 | -0.2393 | 0.1912 |
| OLIGO_04645 | BF045251 | VPS18    | 0.2685  | 0.6050 | -0.2901 | 0.5502 | -1.0296 | 0.0117 | -0.7295 | 0.0410 |
| OLIGO_04646 | BF045253 | CHAF1A   | -0.0650 | 0.8631 | 0.2697  | 0.4442 | 0.0020  | 0.9948 | -0.1522 | 0.5569 |
| OLIGO_09170 | BF045257 | SUMF2    | -0.1685 | 0.6866 | -0.3158 | 0.4141 | 0.5882  | 0.0678 | 0.4945  | 0.0795 |
| OLIGO_11522 | BF045258 | BCAP29   | -0.5472 | 0.0944 | 0.8571  | 0.0048 | 0.4542  | 0.0813 | 0.1435  | 0.5278 |
| OLIGO_04569 | BF045261 | OSTN     | -0.7622 | 0.5126 | -0.4841 | 0.7274 | 0.6403  | 0.3506 | -0.2747 | 0.6369 |
| OLIGO_11453 | BF045265 | RFNG     | 0.2404  | 0.5602 | 0.3644  | 0.3470 | 0.4007  | 0.2179 | 0.4397  | 0.1214 |
| OLIGO_04563 | BF045269 | ATPAF2   | 0.0391  | 0.9107 | -0.3287 | 0.3135 | -0.0953 | 0.7273 | -0.1311 | 0.5834 |
| OLIGO_08831 | BF045271 | SMARCA3  | 0.0469  | 0.9343 | -0.4898 | 0.3952 | -0.3744 | 0.4889 | -1.0033 | 0.1690 |
| OLIGO_07705 | BF045275 | CHD4     | -0.1392 | 0.6803 | 0.1596  | 0.6135 | -0.5547 | 0.0367 | -0.4928 | 0.0340 |
| OLIGO_04163 | BF045278 | TTRAP    | 0.7066  | 0.0737 | -1.2101 | 0.0011 | 0.5005  | 0.1090 | 0.3498  | 0.1971 |
| OLIGO_10855 | BF045287 | GRB7     | 0.7222  | 0.3526 | -1.6526 | 0.0652 | 2.4330  | 0.0285 | 2.2302  | 0.0432 |

|             |          |           |         |        |         |        |         |        |         |        |
|-------------|----------|-----------|---------|--------|---------|--------|---------|--------|---------|--------|
| OLIGO_04169 | BF045292 | HELB      | -0.5884 | 0.1446 | 0.2104  | 0.5738 | -0.0488 | 0.8761 | -0.1780 | 0.5159 |
| OLIGO_04167 | BF045293 | C8ORFK29  | 0.6849  | 0.0486 | -0.2791 | 0.3822 | 0.0701  | 0.7976 | 0.2116  | 0.3663 |
| OLIGO_01699 | BF045301 | METAP2    | 0.0536  | 0.9084 | -0.6583 | 0.1311 | -0.0272 | 0.9406 | 0.2895  | 0.3650 |
| OLIGO_04160 | BF045303 | OSBPL2    | -0.2505 | 0.6791 | 0.1942  | 0.7370 | -0.1535 | 0.7809 | -0.1802 | 0.7346 |
| OLIGO_10674 | BF045315 | LOC515860 | -0.1732 | 0.6754 | 0.9533  | 0.0137 | 0.0116  | 0.9716 | -0.3335 | 0.2411 |
| OLIGO_06203 | BF045317 | JMJD2C    | -0.2437 | 0.5673 | 0.4214  | 0.2761 | 0.3952  | 0.2229 | 0.0574  | 0.8385 |
| OLIGO_08970 | BF045323 | POP5      | -0.1934 | 0.5710 | 0.0951  | 0.7652 | 0.2895  | 0.2821 | -0.1757 | 0.4541 |
| OLIGO_04168 | BF045338 | SNORA14A  | 0.1430  | 0.6540 | 0.2154  | 0.4710 | 0.3184  | 0.2016 | 0.0271  | 0.9005 |
| OLIGO_06535 | BF045342 | TPM1      | 0.1266  | 0.8792 | 0.8059  | 0.3012 | -2.1027 | 0.0014 | -1.1952 | 0.0371 |
| OLIGO_04170 | BF045348 | TAF4      | 0.4897  | 0.1866 | -1.0488 | 0.0024 | -0.1123 | 0.6995 | 0.3557  | 0.1586 |
| OLIGO_04999 | BF045351 | FBXO17    | 0.2154  | 0.8031 | -0.3001 | 0.7224 | 0.2525  | 0.7595 | -0.1749 | 0.8271 |
| OLIGO_09320 | BF045354 | M6PR      | 0.3668  | 0.3022 | -0.3564 | 0.3016 | -0.0618 | 0.8469 | -0.2276 | 0.4672 |
| OLIGO_02336 | BF045355 | IPO7      | 0.2733  | 0.5977 | -0.0137 | 0.9774 | -1.8068 | 0.0000 | -1.0825 | 0.0030 |
| OLIGO_00209 | BF045356 | GRB2      | 0.3600  | 0.1621 | 0.1154  | 0.6291 | -0.5599 | 0.0063 | -0.3563 | 0.0443 |
| OLIGO_05008 | BF045361 | FUK       | 1.4003  | 0.1037 | -0.1946 | 0.8175 | 0.6025  | 0.3878 | -0.0894 | 0.8753 |
| OLIGO_05007 | BF045362 | USP31     | 0.5983  | 0.1802 | -0.5432 | 0.1879 | -0.2098 | 0.5306 | 0.1261  | 0.6649 |
| OLIGO_07187 | BF045365 | TJP2      | 1.7142  | 0.0000 | -1.4228 | 0.0002 | 0.1056  | 0.7281 | 0.2833  | 0.2833 |
| OLIGO_11032 | BF045367 | PEX19     | 0.8688  | 0.0750 | -0.7149 | 0.1228 | 0.2224  | 0.5156 | 0.0415  | 0.8802 |
| OLIGO_05005 | BF045371 | L3MBTL2   | 0.8705  | 0.0053 | -0.0805 | 0.7813 | -0.6471 | 0.0086 | -0.4146 | 0.0556 |
| OLIGO_05002 | BF045373 | RBAK      | -0.1790 | 0.8615 | 0.4970  | 0.6271 | 0.1465  | 0.8698 | -0.0421 | 0.9609 |
| OLIGO_03207 | BF045376 | PDLIM1    | 1.1906  | 0.0144 | -1.8439 | 0.0001 | 1.3066  | 0.0007 | 0.9490  | 0.0046 |
| OLIGO_10914 | BF045381 | POLI      | -0.0283 | 0.9304 | -0.1516 | 0.6170 | -0.1563 | 0.5401 | -0.1952 | 0.3947 |
| OLIGO_10913 | BF045383 | LOC534051 | -0.2447 | 0.4376 | -0.1911 | 0.5272 | -0.0854 | 0.7602 | 0.0499  | 0.8505 |
| OLIGO_08912 | BF045387 | RBM15B    | -0.5227 | 0.2518 | 0.0643  | 0.8749 | 0.2716  | 0.4170 | -0.0891 | 0.7630 |
| OLIGO_09264 | BF045391 | PRR6      | -0.9660 | 0.0051 | 1.2945  | 0.0001 | 0.2644  | 0.3265 | 0.3580  | 0.1293 |
| OLIGO_01239 | BF045394 | UBAP1     | 0.0877  | 0.8079 | -0.0521 | 0.8812 | -0.1336 | 0.6894 | -0.0860 | 0.7872 |
| OLIGO_04568 | BF045396 | MOCS3     | 1.0246  | 0.0006 | -0.9721 | 0.0005 | -0.1417 | 0.5523 | -0.0673 | 0.7423 |
| OLIGO_09207 | BF045398 | FAAH      | 0.4465  | 0.4194 | -0.0378 | 0.9439 | 0.7495  | 0.1636 | 0.7121  | 0.1739 |
| OLIGO_07671 | BF045400 | TBC1D14   | -0.4408 | 0.1492 | 1.1148  | 0.0001 | -0.0866 | 0.7171 | -0.3335 | 0.1116 |
| OLIGO_09257 | BF045406 | LOC531802 | 0.1775  | 0.4941 | -0.0349 | 0.8848 | -0.3052 | 0.1387 | -0.2456 | 0.1686 |
| OLIGO_04570 | BF045408 | CENTB2    | 0.6239  | 0.2038 | -0.3278 | 0.4750 | -0.2662 | 0.4886 | -0.1657 | 0.6225 |
| OLIGO_09261 | BF045410 | HYAL1     | 0.6438  | 0.0333 | -0.4342 | 0.1265 | 0.8653  | 0.0003 | 0.5942  | 0.0043 |
| OLIGO_04571 | BF045411 | C18orf21  | 0.3804  | 0.2128 | -0.4803 | 0.0905 | -0.1128 | 0.6413 | 0.0304  | 0.8847 |
| OLIGO_09262 | BF045413 | LOH12CR1  | -0.1198 | 0.8906 | -0.1870 | 0.8006 | 0.0030  | 0.9953 | -0.4552 | 0.3102 |

|             |          |           |         |        |         |        |         |        |         |        |
|-------------|----------|-----------|---------|--------|---------|--------|---------|--------|---------|--------|
| OLIGO_09263 | BF045415 | FAM13A1   | -1.0308 | 0.1753 | -0.2912 | 0.6821 | 0.1230  | 0.8174 | 0.3911  | 0.4062 |
| OLIGO_06798 | BF045419 | NME3      | 0.4077  | 0.2241 | -0.5220 | 0.0963 | -0.3387 | 0.1975 | -0.0289 | 0.9000 |
| OLIGO_09823 | BF045420 | TBC1D22A  | 0.3483  | 0.2263 | -0.0664 | 0.8039 | 0.4516  | 0.0476 | 0.4283  | 0.0307 |
| OLIGO_04562 | BF045424 | MRPL35    | 0.5201  | 0.0994 | -0.8224 | 0.0054 | -0.5959 | 0.0169 | -0.4604 | 0.0340 |
| OLIGO_08918 | BF045429 | ALOX5     | -0.2024 | 0.7454 | 0.8932  | 0.1702 | -0.2667 | 0.6300 | -0.6592 | 0.2689 |
| OLIGO_04564 | BF045437 | PDE1B     | 0.0656  | 0.8539 | 0.3412  | 0.3062 | 0.3523  | 0.2074 | 0.2433  | 0.3198 |
| OLIGO_04566 | BF045439 | GBAS      | 0.2745  | 0.5082 | -0.3124 | 0.4207 | -0.6751 | 0.0383 | -0.4702 | 0.0989 |
| OLIGO_04572 | BF045443 | GIPC2     | -0.5789 | 0.2365 | 0.1842  | 0.6872 | 1.2311  | 0.0010 | 1.0561  | 0.0013 |
| OLIGO_09258 | BF045444 | CYB5      | -0.8335 | 0.0199 | 0.8047  | 0.0163 | 0.6348  | 0.0236 | 0.6481  | 0.0084 |
| OLIGO_04567 | BF045445 | AKAP11    | -0.2449 | 0.4129 | 0.5239  | 0.0615 | -0.1197 | 0.6096 | -0.0691 | 0.7363 |
| OLIGO_02565 | BF045454 | SPG7      | -1.0231 | 0.0186 | 1.0872  | 0.0075 | -0.2374 | 0.4908 | -0.2828 | 0.3461 |
| OLIGO_11459 | BF045455 | LOC509113 | 0.2241  | 0.5818 | -0.0752 | 0.8438 | -0.1556 | 0.6618 | -0.2498 | 0.5099 |
| OLIGO_09007 | BF045464 | MAST3     | 0.0539  | 0.9087 | 0.9130  | 0.0435 | -0.9354 | 0.0110 | -0.6975 | 0.0301 |
| OLIGO_06489 | BF045469 | CXXC1     | -0.1134 | 0.8407 | 0.4980  | 0.3456 | -1.5884 | 0.0023 | -0.1393 | 0.7305 |
| OLIGO_06544 | BF045470 | ICT1      | -0.6495 | 0.1637 | 0.0729  | 0.8666 | 0.4162  | 0.2582 | -0.1669 | 0.6075 |
| OLIGO_06499 | BF045488 | UFM1      | 0.3074  | 0.5199 | -1.3110 | 0.0035 | 0.4787  | 0.2014 | 0.3738  | 0.2544 |
| OLIGO_10490 | BF045490 | ERBB2     | 0.6100  | 0.1502 | -0.5942 | 0.1416 | 1.0545  | 0.0018 | 1.2079  | 0.0000 |
| OLIGO_06491 | BF045491 | ARL4D     | 0.1953  | 0.5203 | -0.2771 | 0.3260 | 0.5993  | 0.0114 | 0.4047  | 0.0507 |
| OLIGO_08919 | BF045494 | LAMA3     | 0.8953  | 0.2293 | -0.1873 | 0.7890 | -0.0137 | 0.9813 | 0.1053  | 0.8369 |
| OLIGO_05000 | BF045509 | MED28     | -0.6785 | 0.1961 | 0.6275  | 0.2122 | -0.1035 | 0.8031 | -0.1388 | 0.7233 |
| OLIGO_09480 | BF045510 | RYR1      | -0.1195 | 0.6314 | 0.2956  | 0.2047 | 0.0808  | 0.6795 | -0.0871 | 0.6144 |
| OLIGO_06975 | BF045512 | STX8      | 0.0136  | 0.9773 | -0.1507 | 0.7363 | 0.4231  | 0.2566 | 0.2621  | 0.4219 |
| OLIGO_05004 | BF045528 | RPS6KB1   | 0.4568  | 0.4529 | 0.3848  | 0.4997 | 0.1576  | 0.7552 | 0.1088  | 0.8193 |
| OLIGO_11477 | BF045537 | LOC518023 | 0.9978  | 0.0051 | -0.9344 | 0.0048 | -0.3253 | 0.2458 | -0.1512 | 0.5344 |
| OLIGO_09596 | BF045538 | FLJ11184  | -0.0440 | 0.9211 | -0.5435 | 0.1884 | 0.0295  | 0.9339 | -0.1757 | 0.5650 |
| OLIGO_09479 | BF045539 | BXDC5     | 0.9435  | 0.0025 | -1.5076 | 0.0000 | -0.2303 | 0.3476 | 0.0492  | 0.8192 |
| OLIGO_04931 | BF045543 | CAV1      | -0.4815 | 0.3171 | 1.0064  | 0.0248 | -1.2205 | 0.0015 | -0.8474 | 0.0107 |
| OLIGO_04945 | BF045546 | LOC510780 | 0.0659  | 0.8514 | -0.1805 | 0.5835 | -0.1459 | 0.6048 | -0.1528 | 0.5284 |
| OLIGO_04510 | BF045558 | LOC510961 | -0.0706 | 0.9178 | -0.0353 | 0.9576 | 0.3041  | 0.6381 | 0.0614  | 0.9211 |
| OLIGO_08760 | BF045561 | SNF8      | 0.4538  | 0.4711 | 0.2111  | 0.7138 | 0.6428  | 0.1811 | 0.4371  | 0.2963 |
| OLIGO_09052 | BF045562 | AGPAT7    | 0.9505  | 0.0184 | -0.7518 | 0.0460 | 0.0409  | 0.8967 | -0.0817 | 0.7670 |
| OLIGO_10637 | BF045567 | ID3       | -2.7390 | 0.0000 | 3.1454  | 0.0000 | 0.2023  | 0.6804 | -0.0583 | 0.8925 |
| OLIGO_09228 | BF045573 | LOC134145 | -0.0177 | 0.9530 | -0.2988 | 0.2830 | 0.1519  | 0.5242 | 0.0387  | 0.8512 |
| OLIGO_04513 | BF045575 | PHACTR2   | -0.0748 | 0.8637 | 0.8747  | 0.0323 | 0.2262  | 0.5079 | 0.2480  | 0.4071 |

|             |          |           |         |        |         |        |         |        |         |        |
|-------------|----------|-----------|---------|--------|---------|--------|---------|--------|---------|--------|
| OLIGO_02838 | BF045577 | KATNA1    | 0.4373  | 0.1430 | -0.6332 | 0.0233 | -0.6203 | 0.0086 | -0.2497 | 0.2234 |
| OLIGO_07245 | BF045581 | TCEA1     | 0.1632  | 0.5281 | -0.1869 | 0.4398 | -0.7213 | 0.0004 | -0.4473 | 0.0120 |
| OLIGO_04509 | BF045587 | AATF      | -0.0638 | 0.8705 | -0.3269 | 0.3722 | -0.3314 | 0.2813 | -0.7373 | 0.0069 |
| OLIGO_05125 | BF045589 | LOC614612 | 0.6916  | 0.3081 | -0.3353 | 0.5971 | -0.6976 | 0.1898 | -0.6067 | 0.1927 |
| OLIGO_04506 | BF045593 | C14orf142 | 0.4645  | 0.2552 | -0.6070 | 0.1122 | 0.1113  | 0.7278 | -0.0242 | 0.9311 |
| OLIGO_11314 | BF045597 | TCEB2     | -0.5903 | 0.2156 | 0.0686  | 0.8776 | 0.0578  | 0.8769 | 0.0797  | 0.8074 |
| OLIGO_09226 | BF045598 | KIAA0376  | 0.3344  | 0.6187 | -1.5174 | 0.0262 | -0.4695 | 0.2760 | -0.2995 | 0.4314 |
| OLIGO_04514 | BF045602 | RAB28     | 0.4942  | 0.1065 | 0.1244  | 0.6635 | -0.8353 | 0.0005 | -0.6082 | 0.0039 |
| OLIGO_06548 | BF045613 | SC4MOL    | 0.0289  | 0.9319 | 0.0085  | 0.9788 | -0.5272 | 0.1720 | -0.8446 | 0.1142 |
| OLIGO_04512 | BF045616 | CCDC101   | -0.0101 | 0.9924 | -1.6483 | 0.1514 | -0.6635 | 0.4810 | -0.4725 | 0.5923 |
| OLIGO_06507 | BF045632 | KIAA1143  | 0.4537  | 0.1214 | -0.6218 | 0.0234 | 0.3261  | 0.1558 | 0.2782  | 0.1696 |
| OLIGO_06508 | BF045634 | AP3S1     | -0.0314 | 0.9241 | 0.0658  | 0.8309 | 0.1802  | 0.4886 | 0.2975  | 0.1902 |
| OLIGO_04073 | BF045639 | C5orf5    | -1.1100 | 0.2253 | 0.6295  | 0.4645 | 1.2494  | 0.0817 | 0.3354  | 0.5954 |
| OLIGO_08081 | BF045642 | WDR55     | 0.6099  | 0.2568 | -0.8658 | 0.1130 | 0.2969  | 0.5227 | -0.0415 | 0.9223 |
| OLIGO_06444 | BF045645 | CCBP2     | 0.2977  | 0.3969 | 0.2619  | 0.4249 | 1.5952  | 0.0000 | 1.1319  | 0.0000 |
| OLIGO_06441 | BF045646 | LOC203547 | 0.8162  | 0.0950 | -0.4263 | 0.3227 | -0.2107 | 0.5917 | 0.4151  | 0.3113 |
| OLIGO_06460 | BF045654 | CBX8      | -0.6244 | 0.3037 | 0.5809  | 0.3212 | 0.4704  | 0.3936 | 0.0731  | 0.8804 |
| OLIGO_06461 | BF045655 | HAP1      | -0.3567 | 0.6053 | 0.0940  | 0.8845 | 2.5007  | 0.0495 | 1.7237  | 0.1336 |
| OLIGO_06467 | BF045656 | LOC644538 | -1.5872 | 0.0574 | -0.9495 | 0.2446 | 1.1427  | 0.0372 | 0.8161  | 0.0916 |
| OLIGO_06415 | BF045658 | TRAF6     | 0.0516  | 0.8816 | -0.6381 | 0.0492 | 0.6958  | 0.0111 | 0.9150  | 0.0002 |
| OLIGO_06428 | BF045659 | TUBGCP2   | -0.8130 | 0.0445 | 1.6647  | 0.0000 | -0.3472 | 0.2727 | -0.2094 | 0.4496 |
| OLIGO_06429 | BF045661 | CPVL      | 0.5318  | 0.4674 | 0.4117  | 0.5474 | 0.7580  | 0.2087 | 0.3523  | 0.5140 |
| OLIGO_04937 | BF045665 | LOC533526 | 0.4802  | 0.2488 | -1.2032 | 0.0019 | -0.1327 | 0.6884 | 0.1448  | 0.6130 |
| OLIGO_04418 | BF045666 | ACADS     | 0.3215  | 0.5025 | -0.1683 | 0.7098 | 0.3627  | 0.4114 | 0.2924  | 0.4831 |
| OLIGO_08739 | BF045667 | CTSL      | 1.8042  | 0.0009 | -1.6403 | 0.0011 | -1.5610 | 0.0003 | -1.3671 | 0.0002 |
| OLIGO_07853 | BF045672 | SPCS1     | -0.0613 | 0.8374 | -0.2571 | 0.3568 | -0.3844 | 0.1029 | -0.3657 | 0.0755 |
| OLIGO_04936 | BF045674 | LOC614667 | 0.4106  | 0.5985 | 0.6479  | 0.3280 | 1.3173  | 0.0007 | 0.8124  | 0.0173 |
| OLIGO_11676 | BF045676 | DCTN3     | 0.2507  | 0.3125 | -0.5011 | 0.0305 | -0.3431 | 0.0809 | -0.2941 | 0.0851 |
| OLIGO_04940 | BF045680 | YIPF4     | 0.9874  | 0.0006 | -1.1309 | 0.0000 | -0.1172 | 0.6046 | 0.1137  | 0.5640 |
| OLIGO_04941 | BF045681 | SLC25A17  | 0.1839  | 0.6676 | -0.1536 | 0.7031 | 0.9735  | 0.0042 | 0.6607  | 0.0252 |
| OLIGO_04939 | BF045691 | LTV1      | 0.3856  | 0.1950 | -0.5721 | 0.0396 | -0.2176 | 0.3575 | -0.1295 | 0.5268 |
| OLIGO_08281 | BF045696 | DYNC1LI1  | -0.2546 | 0.4527 | -0.1777 | 0.5735 | -0.3737 | 0.1639 | -0.2940 | 0.2126 |
| OLIGO_04935 | BF045701 | PKIG      | 1.9000  | 0.0038 | -3.1713 | 0.0002 | 0.3394  | 0.4090 | -0.0236 | 0.9449 |
| OLIGO_04932 | BF045708 | D15Wsu75e | 0.4502  | 0.2095 | -0.0211 | 0.9498 | -0.8685 | 0.0021 | -0.5536 | 0.0248 |

|             |          |           |         |        |         |        |         |        |         |        |
|-------------|----------|-----------|---------|--------|---------|--------|---------|--------|---------|--------|
| OLIGO_04933 | BF045710 | AARSD1    | 0.4617  | 0.2400 | -0.4949 | 0.1781 | 0.1964  | 0.5234 | 0.0982  | 0.7154 |
| OLIGO_10616 | BF045727 | APCDD1    | -0.1178 | 0.8601 | 0.6081  | 0.3271 | 2.0665  | 0.0001 | 1.6502  | 0.0003 |
| OLIGO_08747 | BF045735 | TMPIT     | -0.0829 | 0.8311 | 0.7777  | 0.0334 | 0.8226  | 0.0077 | 0.6950  | 0.0096 |
| OLIGO_04444 | BF045743 | FLJ20160  | -0.7734 | 0.1437 | 1.2869  | 0.0077 | 0.9940  | 0.0171 | 0.2340  | 0.5106 |
| OLIGO_08972 | BF045749 | ZNHIT4    | -0.0893 | 0.8177 | -0.4159 | 0.2575 | 0.2535  | 0.4038 | 0.1643  | 0.5366 |
| OLIGO_09164 | BF045750 | TMEM24    | 0.7555  | 0.3481 | -0.7199 | 0.3390 | -1.1428 | 0.0707 | -0.7274 | 0.1899 |
| OLIGO_09165 | BF045752 | SGPL1     | 1.1536  | 0.0359 | -1.2061 | 0.0191 | 1.3146  | 0.0023 | 1.2757  | 0.0008 |
| OLIGO_04442 | BF045754 | IBRDC1    | 0.1941  | 0.7110 | 0.3555  | 0.4649 | 0.5647  | 0.1659 | 0.4590  | 0.1983 |
| OLIGO_04443 | BF045755 | GRSF1     | 0.4214  | 0.1869 | -0.4991 | 0.0947 | 0.2531  | 0.3126 | 0.5685  | 0.0098 |
| OLIGO_04445 | BF045762 | CCNC      | 0.4232  | 0.1534 | -0.7642 | 0.0060 | -0.1292 | 0.5776 | -0.1451 | 0.4750 |
| OLIGO_09166 | BF045775 | DENND2A   | -0.5132 | 0.2796 | 0.8261  | 0.0644 | 1.4024  | 0.0002 | 0.4547  | 0.1694 |
| OLIGO_10559 | BF045777 | AGPAT1    | 0.0252  | 0.9554 | -1.1260 | 0.0147 | 0.9362  | 0.0032 | 0.5839  | 0.0323 |
| OLIGO_09173 | BF045781 | C9orf42   | 0.1622  | 0.4191 | -0.0369 | 0.8442 | -0.3257 | 0.0388 | -0.1575 | 0.2528 |
| OLIGO_11575 | BF045790 | EIF3S8    | 0.1325  | 0.7039 | -0.1415 | 0.6645 | -0.2883 | 0.2917 | -0.2167 | 0.3654 |
| OLIGO_08220 | BF045796 | SWAP70    | -0.3090 | 0.7564 | 0.3500  | 0.7154 | -1.4053 | 0.1593 | -0.8129 | 0.3636 |
| OLIGO_06427 | BF045797 | PHF1      | 0.6605  | 0.0207 | -0.2430 | 0.3616 | -0.0214 | 0.9237 | 0.1319  | 0.4996 |
| OLIGO_04072 | BF045800 | SEMA4B    | 0.0976  | 0.7839 | 0.1955  | 0.5514 | 0.0081  | 0.9765 | -0.3622 | 0.1321 |
| OLIGO_06477 | BF045807 | MOCOS     | 0.5019  | 0.5320 | -0.4715 | 0.5463 | 0.3102  | 0.6616 | 0.6641  | 0.3467 |
| OLIGO_04849 | BF045808 | PANK2     | -0.3172 | 0.2668 | 0.5416  | 0.0424 | -0.5338 | 0.0182 | -0.3264 | 0.0968 |
| OLIGO_06479 | BF045810 | MAN1A2    | 0.6049  | 0.1844 | -0.7725 | 0.0718 | 0.1177  | 0.7413 | 0.2861  | 0.3613 |
| OLIGO_06445 | BF045812 | SENP5     | 0.5150  | 0.4667 | -0.0822 | 0.8910 | 0.1692  | 0.6866 | 0.0524  | 0.8872 |
| OLIGO_11439 | BF045830 | PPP1R13L  | -0.2365 | 0.6261 | 0.3963  | 0.4084 | -0.2197 | 0.6262 | -0.1536 | 0.7195 |
| OLIGO_09231 | BF045839 | PXK       | 0.0588  | 0.8828 | 0.2178  | 0.5591 | 0.1250  | 0.6890 | 0.0203  | 0.9409 |
| OLIGO_09445 | BF045842 | RGS10     | -1.4981 | 0.0687 | 1.6905  | 0.0282 | -0.0542 | 0.9335 | 0.0302  | 0.9576 |
| OLIGO_04954 | BF045843 | CRB3      | -0.0207 | 0.9638 | 0.0626  | 0.8878 | 0.7231  | 0.1131 | 0.6064  | 0.1632 |
| OLIGO_11596 | BF045844 | GNA15     | -0.5775 | 0.0945 | 0.9580  | 0.0031 | 0.6773  | 0.0129 | 0.4825  | 0.0422 |
| OLIGO_04953 | BF045850 | LOC506408 | -0.0285 | 0.9658 | 0.4110  | 0.5132 | -0.0142 | 0.9780 | -0.2877 | 0.5241 |
| OLIGO_02578 | BF045855 | LSM12     | 0.4084  | 0.2082 | -0.4940 | 0.1038 | -0.5478 | 0.0319 | -0.3707 | 0.0999 |
| OLIGO_07717 | BF045856 | SCAND1    | -0.4343 | 0.1896 | 0.3551  | 0.2572 | -0.1679 | 0.5443 | -0.3214 | 0.2976 |
| OLIGO_04948 | BF045865 | COL8A1    | 0.2311  | 0.7668 | -0.6498 | 0.3725 | 1.1664  | 0.0110 | 1.2044  | 0.0028 |
| OLIGO_04949 | BF045866 | EIF2C3    | 0.0567  | 0.8927 | 0.4564  | 0.2294 | 0.3871  | 0.2149 | 0.3034  | 0.2668 |
| OLIGO_08956 | BF045867 | C16orf68  | -1.8753 | 0.0048 | 2.0505  | 0.0009 | 3.2404  | 0.0000 | 2.6729  | 0.0000 |
| OLIGO_04956 | BF045873 | KIAA0701  | -0.4613 | 0.4987 | 0.2552  | 0.6889 | 2.3648  | 0.0000 | 1.8974  | 0.0001 |
| OLIGO_01475 | BF045874 | HEATR1    | -0.0199 | 0.9436 | 0.9392  | 0.0004 | -0.0795 | 0.7216 | 0.1833  | 0.3437 |

|             |          |          |         |        |         |        |         |        |         |        |
|-------------|----------|----------|---------|--------|---------|--------|---------|--------|---------|--------|
| OLIGO_11779 | BF045877 | VPS4B    | -0.0817 | 0.8475 | 0.0268  | 0.9461 | 0.1055  | 0.7777 | 0.2999  | 0.3247 |
| OLIGO_04951 | BF045881 | VASH1    | 0.7346  | 0.1655 | -0.5102 | 0.2985 | 0.3775  | 0.2841 | 0.0223  | 0.9424 |
| OLIGO_09297 | BF045882 | INPP4A   | -0.0189 | 0.9555 | 0.1227  | 0.6988 | 0.4871  | 0.0670 | 0.0834  | 0.7195 |
| OLIGO_10894 | BF045885 | TRIB3    | 0.4047  | 0.3397 | -0.5222 | 0.1872 | 0.7161  | 0.0322 | 1.1576  | 0.0001 |
| OLIGO_07763 | BF045890 | SEC23IP  | 0.1293  | 0.7065 | -0.6400 | 0.0468 | -0.0600 | 0.8251 | -0.0845 | 0.7204 |
| OLIGO_09129 | BF045893 | PLAC8    | -1.0995 | 0.0387 | 1.4720  | 0.0030 | -1.1576 | 0.0061 | -1.1040 | 0.0026 |
| OLIGO_02609 | BF045898 | GCLM     | 0.6302  | 0.0661 | -0.0199 | 0.9504 | -0.7151 | 0.0079 | -0.3940 | 0.0939 |
| OLIGO_01022 | BF045899 | CECR5    | -0.7346 | 0.0885 | 1.0633  | 0.0085 | -0.5401 | 0.1099 | -0.5976 | 0.0435 |
| OLIGO_09178 | BF045903 | NPR1     | -0.4749 | 0.3693 | 0.0688  | 0.8893 | 0.2435  | 0.5224 | 0.4681  | 0.1579 |
| OLIGO_04447 | BF045905 | NUAK1    | -1.3537 | 0.0009 | 1.7635  | 0.0000 | 0.0925  | 0.7714 | 0.3506  | 0.2084 |
| OLIGO_04448 | BF045906 | HLF      | -0.0748 | 0.8767 | -0.3212 | 0.4620 | 0.2763  | 0.4487 | -0.1116 | 0.7256 |
| OLIGO_04446 | BF045912 | PLK3     | 0.9965  | 0.1511 | -0.6558 | 0.2997 | -0.3142 | 0.4818 | -0.3339 | 0.3932 |
| OLIGO_09176 | BF045916 | GABPB2   | 0.3458  | 0.5172 | -0.1014 | 0.8421 | 0.2452  | 0.5333 | 0.3669  | 0.2872 |
| OLIGO_04453 | BF045927 | FBXL2    | 0.6515  | 0.1988 | 0.0165  | 0.9722 | 0.1028  | 0.7974 | 0.0651  | 0.8517 |
| OLIGO_07672 | BF045929 | EHD1     | 0.3157  | 0.4081 | -0.1383 | 0.6984 | 0.1870  | 0.5375 | -0.0039 | 0.9883 |
| OLIGO_04457 | BF045932 | MRPS11   | 0.3702  | 0.1213 | -0.6218 | 0.0054 | 0.0802  | 0.6707 | 0.0771  | 0.6380 |
| OLIGO_07412 | BF045933 | UBL5     | 0.6433  | 0.0670 | -0.3598 | 0.2729 | -0.7412 | 0.0072 | -0.5814 | 0.0160 |
| OLIGO_09179 | BF045934 | PLAGL2   | -0.6056 | 0.0527 | -0.1351 | 0.6416 | -0.3831 | 0.1216 | -0.2134 | 0.3313 |
| OLIGO_09136 | BF045936 | CUTL1    | -0.2881 | 0.2234 | 0.5055  | 0.0222 | -0.2218 | 0.2361 | -0.2466 | 0.1341 |
| OLIGO_09108 | BF045939 | PXK      | 0.7694  | 0.0248 | -0.0111 | 0.9722 | -0.0849 | 0.7512 | 0.2369  | 0.3125 |
| OLIGO_04044 | BF045945 | SPIN-2   | 0.0901  | 0.8658 | -0.1658 | 0.7395 | 0.4357  | 0.2989 | 0.1812  | 0.6271 |
| OLIGO_06359 | BF045949 | PROSC    | 1.1406  | 0.1097 | -1.9235 | 0.0040 | -0.6301 | 0.2591 | -0.2328 | 0.6338 |
| OLIGO_04042 | BF045951 | BCL6     | 0.6128  | 0.1400 | -0.5144 | 0.1832 | 0.8454  | 0.0117 | 0.5461  | 0.0567 |
| OLIGO_08817 | BF045955 | MGC15875 | 0.3117  | 0.7185 | -0.1774 | 0.8304 | 0.6383  | 0.4437 | -0.3175 | 0.6747 |
| OLIGO_04048 | BF045958 | MRM1     | -0.1448 | 0.6203 | 0.1493  | 0.5951 | -0.1385 | 0.5966 | 0.0149  | 0.9505 |
| OLIGO_10634 | BF045963 | UBE2T    | -0.1351 | 0.7741 | 0.1412  | 0.7493 | -0.1428 | 0.6932 | -0.1746 | 0.5817 |
| OLIGO_04045 | BF045969 | TSPAN12  | 0.2964  | 0.5501 | 0.7004  | 0.1674 | -0.4582 | 0.3223 | -0.2455 | 0.5621 |
| OLIGO_04046 | BF045970 | CCDC95   | 0.3296  | 0.5285 | 0.0216  | 0.9648 | 0.1604  | 0.7216 | 0.2493  | 0.5668 |
| OLIGO_08826 | BF045971 | C1orf9   | 0.5931  | 0.1528 | -0.2048 | 0.5991 | 0.3266  | 0.3151 | 0.4228  | 0.1390 |
| OLIGO_04047 | BF045975 | C8orf1   | 1.3578  | 0.0002 | -1.0961 | 0.0013 | -1.1694 | 0.0000 | -0.6565 | 0.0085 |
| OLIGO_08774 | BF045981 | GNAT1    | 1.1254  | 0.0219 | -1.4428 | 0.0011 | 0.2952  | 0.4131 | 0.0623  | 0.8426 |
| OLIGO_06361 | BF045982 | EPB41L2  | -0.7090 | 0.1039 | 0.6697  | 0.1151 | -0.7971 | 0.0930 | -0.5741 | 0.1866 |
| OLIGO_04052 | BF045987 | ATP6V0D2 | 0.7720  | 0.1989 | -1.2880 | 0.0561 | 1.1787  | 0.0985 | 1.0624  | 0.1541 |
| OLIGO_00565 | BF045990 | TMEM16F  | -0.5237 | 0.3104 | 0.0378  | 0.9360 | -0.0303 | 0.9385 | 0.0094  | 0.9784 |

|             |          |              |         |        |         |        |         |        |         |        |
|-------------|----------|--------------|---------|--------|---------|--------|---------|--------|---------|--------|
| OLIGO_00329 | BF045997 | PTP4A1       | 0.3199  | 0.3516 | -0.5340 | 0.0968 | -1.1466 | 0.0000 | -0.5997 | 0.0112 |
| OLIGO_08823 | BF045999 | NDUFB11      | 0.6062  | 0.0385 | 0.0212  | 0.9379 | -0.8826 | 0.0002 | -0.4986 | 0.0136 |
| OLIGO_08821 | BF046000 | HSPB3        | 0.3233  | 0.6388 | -0.0307 | 0.9615 | 0.6749  | 0.2138 | 0.5591  | 0.2281 |
| OLIGO_08824 | BF046010 | FAM50A       | 0.3168  | 0.4385 | 0.2192  | 0.5665 | 0.1975  | 0.5393 | 0.0435  | 0.8795 |
| OLIGO_07962 | BF046014 | PRDX1        | 0.8075  | 0.1726 | -1.2450 | 0.0248 | -0.9981 | 0.0317 | -0.7864 | 0.0531 |
| OLIGO_08827 | BF046015 | SDHA         | -0.0078 | 0.9794 | -0.1917 | 0.4936 | -0.1034 | 0.6636 | -0.2986 | 0.1492 |
| OLIGO_04051 | BF046016 | MANSC1       | 0.3116  | 0.2656 | -0.3133 | 0.2314 | 0.3357  | 0.1264 | 0.0490  | 0.7992 |
| OLIGO_08818 | BF046020 | FBXO9        | -0.7713 | 0.0264 | 0.4325  | 0.1748 | -0.6876 | 0.0165 | -0.5710 | 0.0179 |
| OLIGO_04883 | BF046026 | KIAA1008     | 0.9104  | 0.0319 | -1.6303 | 0.0000 | 0.2719  | 0.4131 | 0.3150  | 0.2834 |
| OLIGO_07193 | BF046028 | EIF3S2       | 0.6523  | 0.0670 | -0.1796 | 0.5859 | -0.1673 | 0.5537 | -0.2038 | 0.4151 |
| OLIGO_04884 | BF046030 | FLJ34077     | 0.2768  | 0.6569 | -0.1727 | 0.7666 | 2.5824  | 0.0000 | 1.9876  | 0.0000 |
| OLIGO_04877 | BF046034 | SHB          | -0.8512 | 0.2192 | 0.3878  | 0.5492 | 2.1611  | 0.0001 | 1.9917  | 0.0000 |
| OLIGO_07866 | BF046043 | ARL8B        | 0.4641  | 0.0800 | -0.1311 | 0.5946 | -0.3634 | 0.0831 | -0.2027 | 0.2658 |
| OLIGO_08176 | BF046049 | SMU1         | 0.6319  | 0.0418 | -0.9925 | 0.0007 | -0.6716 | 0.0059 | -0.2632 | 0.2158 |
| OLIGO_04460 | BF046054 | ATG16L1      | 0.5034  | 0.3274 | -0.6219 | 0.1959 | -0.2547 | 0.5270 | -0.2992 | 0.3961 |
| OLIGO_08105 | BF046055 | PAPD1        | -0.0915 | 0.7847 | -0.1406 | 0.6534 | 0.2020  | 0.4520 | 0.0309  | 0.8971 |
| OLIGO_04461 | BF046056 | LOC441682    | 0.4320  | 0.2054 | -0.7176 | 0.0630 | 0.1519  | 0.5884 | -0.0968 | 0.7107 |
| OLIGO_04455 | BF046066 | ZNF350       | 0.1566  | 0.7767 | 0.0370  | 0.9428 | 1.0332  | 0.0164 | 0.7554  | 0.0448 |
| OLIGO_04456 | BF046067 | C1QTNF5      | -0.2973 | 0.7029 | 0.8685  | 0.2612 | 0.5983  | 0.4253 | 0.5451  | 0.4548 |
| OLIGO_09182 | BF046071 | HBXIP        | 0.3742  | 0.3293 | -0.3405 | 0.3587 | -0.5099 | 0.1684 | -0.2175 | 0.5197 |
| OLIGO_00087 | BF046074 | CCL15        | -0.8270 | 0.2433 | 0.6453  | 0.3185 | 2.2735  | 0.0000 | 2.7300  | 0.0000 |
| OLIGO_04458 | BF046084 | RP11-56A21.1 | 1.0718  | 0.1176 | -0.2937 | 0.6014 | 1.2581  | 0.1259 | 0.9619  | 0.2134 |
| OLIGO_09180 | BF046094 | MITF         | -0.3049 | 0.6624 | 0.0140  | 0.9832 | 0.2679  | 0.6647 | 0.2872  | 0.6104 |
| OLIGO_04450 | BF046097 | MGC11102     | 0.6349  | 0.2463 | -0.7148 | 0.1629 | 0.1911  | 0.6559 | 0.1634  | 0.6635 |
| OLIGO_04451 | BF046098 | ANKMY2       | 0.4542  | 0.2843 | -0.8636 | 0.0295 | 0.5046  | 0.1316 | 0.4855  | 0.0962 |
| OLIGO_09917 | BF046108 | HDAC3        | -0.2038 | 0.7154 | 0.0685  | 0.8957 | -0.4798 | 0.2737 | -0.3434 | 0.3708 |
| OLIGO_04459 | BF046111 | TOMM34       | -0.7278 | 0.0296 | 0.6920  | 0.0266 | 0.0748  | 0.7761 | -0.4666 | 0.0424 |
| OLIGO_04454 | BF046114 | ALAS1        | 0.8756  | 0.0025 | -0.1302 | 0.6257 | -0.3523 | 0.1223 | -0.2897 | 0.1426 |
| OLIGO_11239 | BF046115 | PPP4C        | -0.4408 | 0.1747 | 0.1467  | 0.6237 | -0.5851 | 0.0241 | -0.3000 | 0.1744 |
| OLIGO_06372 | BF046118 | PSMD1        | 0.1480  | 0.5332 | -0.4862 | 0.0277 | 0.0012  | 0.9948 | -0.1593 | 0.3277 |
| OLIGO_04054 | BF046125 | ARL6IP6      | -0.1653 | 0.6353 | -0.1660 | 0.6113 | -0.2008 | 0.4659 | -0.0404 | 0.8661 |
| OLIGO_04055 | BF046127 | FOXP1        | -0.5614 | 0.3469 | 0.9665  | 0.1408 | -1.0618 | 0.1372 | -0.8144 | 0.2270 |
| OLIGO_06392 | BF046128 | NCOA6IP      | 0.5138  | 0.1224 | -0.8976 | 0.0034 | 0.2168  | 0.3991 | 0.1244  | 0.5789 |
| OLIGO_08061 | BF046129 | OPRS1        | 0.1956  | 0.6026 | -0.5422 | 0.1887 | -0.0626 | 0.8507 | -0.2852 | 0.4263 |

|             |          |           |         |        |         |        |         |        |         |        |
|-------------|----------|-----------|---------|--------|---------|--------|---------|--------|---------|--------|
| OLIGO_06405 | BF046134 | GJA5      | -1.0970 | 0.0734 | 0.9975  | 0.0760 | 1.8894  | 0.0001 | 1.7887  | 0.0000 |
| OLIGO_08835 | BF046135 | TRIM71    | 0.6451  | 0.2238 | -1.0343 | 0.0374 | -0.2725 | 0.5348 | -0.7114 | 0.0607 |
| OLIGO_06406 | BF046136 | SNX16     | 0.2820  | 0.6108 | -0.4760 | 0.4028 | 0.1063  | 0.7794 | 0.1076  | 0.7460 |
| OLIGO_06398 | BF046141 | PTPLA     | -0.5107 | 0.0839 | 0.8899  | 0.0013 | -0.3831 | 0.0994 | -0.6215 | 0.0023 |
| OLIGO_08832 | BF046145 | LOC526200 | 0.2079  | 0.6131 | 0.4375  | 0.2556 | -0.1986 | 0.5446 | -0.0013 | 0.9964 |
| OLIGO_04043 | BF046147 | GMPPB     | -0.1816 | 0.7659 | -1.0297 | 0.1179 | -0.1053 | 0.8509 | -0.1352 | 0.8001 |
| OLIGO_04053 | BF046162 | CPA5      | -0.0647 | 0.9566 | 0.4468  | 0.7017 | -0.5018 | 0.6620 | -0.3536 | 0.7517 |
| OLIGO_07349 | BF046164 | MFHAS1    | 1.3673  | 0.0068 | -0.5408 | 0.2504 | -1.9818 | 0.0000 | -1.6790 | 0.0000 |
| OLIGO_10906 | BF046171 | DOCK10    | 1.3644  | 0.0155 | -0.4414 | 0.3995 | -1.6279 | 0.0003 | -1.5888 | 0.0001 |
| OLIGO_04878 | BF046176 | DNMT2     | -0.0373 | 0.9213 | 0.3117  | 0.3774 | 0.5691  | 0.0550 | 0.1024  | 0.6927 |
| OLIGO_06970 | BF046180 | COX4NB    | 0.8508  | 0.1590 | -0.1705 | 0.7912 | 0.0827  | 0.7968 | -0.0936 | 0.7391 |
| OLIGO_04876 | BF046181 | ZNF295    | 0.0058  | 0.9838 | -0.0443 | 0.8716 | 0.4713  | 0.2584 | 0.3500  | 0.3038 |
| OLIGO_08127 | BF046183 | NGRN      | 0.1211  | 0.7231 | -0.8214 | 0.0104 | -0.4522 | 0.0918 | -0.0517 | 0.8255 |
| OLIGO_09415 | BF046185 | SHANK3    | -0.1771 | 0.7600 | 0.5390  | 0.3205 | 0.0355  | 0.9388 | -0.2298 | 0.5652 |
| OLIGO_09417 | BF046189 | SSH2      | 0.0383  | 0.9265 | 0.1472  | 0.7041 | -0.2688 | 0.4116 | -0.2124 | 0.4570 |
| OLIGO_08018 | BF046190 | PTGDS     | -1.4967 | 0.0061 | 2.1828  | 0.0000 | -1.5161 | 0.0005 | -1.4089 | 0.0002 |
| OLIGO_08235 | BF046191 | LOC508141 | -0.2576 | 0.4758 | -0.0587 | 0.8607 | -0.4236 | 0.2619 | -0.2632 | 0.4368 |
| OLIGO_04879 | BF046192 | HSD11B2   | 0.2806  | 0.5005 | -0.2690 | 0.5054 | 1.1446  | 0.0121 | 0.8365  | 0.0449 |
| OLIGO_07074 | BF046197 | KIAA0913  | 0.6869  | 0.0541 | -0.7210 | 0.0307 | -0.9296 | 0.0009 | -0.4901 | 0.0452 |
| OLIGO_02045 | BF046198 | SUCLA2    | 0.7483  | 0.2673 | -1.1190 | 0.1097 | 0.3488  | 0.5394 | 0.0239  | 0.9627 |
| OLIGO_09033 | BF046199 | C15orf39  | 0.0406  | 0.9250 | -0.1343 | 0.7402 | 0.8517  | 0.0120 | 0.5162  | 0.0811 |
| OLIGO_07913 | BF046201 | GDF6      | -0.9710 | 0.2634 | 0.4539  | 0.5611 | 2.8954  | 0.0486 | 2.7093  | 0.0871 |
| OLIGO_04872 | BF046202 | PLK2      | -0.1698 | 0.7463 | -0.4660 | 0.3673 | -1.5711 | 0.0407 | -1.2299 | 0.1011 |
| OLIGO_11331 | BF046205 | TXNDC4    | 0.5009  | 0.3310 | -0.8414 | 0.1196 | 0.8535  | 0.1241 | 1.1200  | 0.0905 |
| OLIGO_06853 | BF046219 | SNRPD2    | -0.1516 | 0.6339 | -0.0452 | 0.8793 | 0.0245  | 0.9217 | -0.1388 | 0.5253 |
| OLIGO_02211 | BF046222 | AKAP8L    | 0.3372  | 0.6602 | -0.1054 | 0.8839 | -0.4627 | 0.4414 | -0.4352 | 0.4081 |
| OLIGO_09133 | BF046223 | AHDC1     | 0.0981  | 0.8239 | -0.0410 | 0.9202 | -0.3803 | 0.2674 | -0.2436 | 0.4170 |
| OLIGO_07835 | BF046234 | RABEP1    | -0.1845 | 0.6688 | 0.3490  | 0.3870 | 0.0463  | 0.8910 | -0.2232 | 0.4506 |
| OLIGO_04383 | BF046258 | C20orf74  | 0.3281  | 0.2413 | -0.1778 | 0.4931 | -0.5014 | 0.0245 | -0.3696 | 0.0547 |
| OLIGO_04381 | BF046270 | GPR68     | 0.5831  | 0.0684 | -0.0941 | 0.7220 | -0.0464 | 0.8450 | 0.1133  | 0.6223 |
| OLIGO_09130 | BF046278 | LAMC2     | -0.5374 | 0.1718 | 1.4630  | 0.0001 | -0.5181 | 0.1182 | 0.0104  | 0.9702 |
| OLIGO_07369 | BF046279 | MAGED2    | -1.0446 | 0.0008 | 1.1011  | 0.0002 | 0.1299  | 0.5960 | 0.0031  | 0.9884 |
| OLIGO_04376 | BF046280 | TXNDC12   | -0.1504 | 0.6632 | 0.2034  | 0.5265 | 0.7258  | 0.0083 | 1.1918  | 0.0000 |
| OLIGO_04382 | BF046282 | TRIM41    | 0.2100  | 0.4942 | -0.0771 | 0.7896 | -0.6467 | 0.0074 | -0.3913 | 0.0636 |

|             |          |           |         |        |         |        |         |        |         |        |
|-------------|----------|-----------|---------|--------|---------|--------|---------|--------|---------|--------|
| OLIGO_04378 | BF046285 | CYLN2     | 0.0844  | 0.7968 | 0.2686  | 0.3810 | 0.2360  | 0.3585 | 0.1886  | 0.4035 |
| OLIGO_02636 | BF046289 | Usp12     | 0.2354  | 0.4794 | -0.2104 | 0.5091 | 0.0240  | 0.9333 | -0.0529 | 0.8483 |
| OLIGO_06397 | BF046291 | MESDC2    | -0.3874 | 0.3540 | -0.4512 | 0.2484 | -0.0734 | 0.8226 | 0.0159  | 0.9556 |
| OLIGO_06383 | BF046293 | Clorf163  | 0.3268  | 0.2154 | -0.6561 | 0.0080 | -0.1195 | 0.5629 | -0.2212 | 0.2216 |
| OLIGO_08210 | BF046302 | FBXO31    | 0.0271  | 0.9466 | 0.3934  | 0.2994 | -0.4887 | 0.1242 | -0.4394 | 0.1145 |
| OLIGO_09525 | BF046308 | LOC508887 | 0.6930  | 0.1158 | -0.4501 | 0.2606 | 0.0109  | 0.9738 | 0.0596  | 0.8498 |
| OLIGO_06300 | BF046312 | ILF3      | 0.4091  | 0.1227 | -0.5634 | 0.0233 | -0.0746 | 0.7190 | -0.0999 | 0.5822 |
| OLIGO_04010 | BF046332 | AP1S3     | 0.9372  | 0.0470 | -0.8596 | 0.0656 | -0.3348 | 0.3340 | 0.1258  | 0.6661 |
| OLIGO_06311 | BF046336 | MRPS5     | 0.3391  | 0.3783 | -0.7541 | 0.0366 | 0.5552  | 0.0661 | 0.6295  | 0.0175 |
| OLIGO_04815 | BF046342 | BC050254  | 0.1942  | 0.4535 | 0.2296  | 0.3419 | -0.2060 | 0.3131 | -0.2155 | 0.2263 |
| OLIGO_09388 | BF046350 | FAM80A    | -0.7550 | 0.0689 | 0.5696  | 0.1415 | 0.9716  | 0.0030 | 0.8752  | 0.0022 |
| OLIGO_02917 | BF046357 | BSDC1     | 0.3245  | 0.5648 | -0.4330 | 0.4324 | -0.4723 | 0.3824 | -0.4418 | 0.4125 |
| OLIGO_04819 | BF046359 | IFI30     | 0.8907  | 0.0396 | -1.5473 | 0.0001 | 1.2642  | 0.0003 | 0.9233  | 0.0020 |
| OLIGO_04817 | BF046365 | ZFYVE20   | -0.3539 | 0.3033 | 0.0576  | 0.8569 | 1.2276  | 0.0000 | 0.8487  | 0.0003 |
| OLIGO_04807 | BF046366 | SON       | -0.1216 | 0.6077 | -0.0701 | 0.7514 | -0.1315 | 0.4801 | -0.0268 | 0.8691 |
| OLIGO_04806 | BF046367 | LDLRAP1   | -0.6815 | 0.0233 | 1.0177  | 0.0003 | 0.5374  | 0.0241 | 0.4992  | 0.0155 |
| OLIGO_11028 | BF046369 | LUC7L     | 0.0255  | 0.9329 | -0.2139 | 0.4502 | -0.1129 | 0.6359 | -0.0458 | 0.8260 |
| OLIGO_04814 | BF046372 | BRP44     | 0.6515  | 0.0651 | -0.3952 | 0.2310 | -0.9896 | 0.0004 | -0.6332 | 0.0091 |
| OLIGO_04812 | BF046373 | TERF1     | 0.6652  | 0.2325 | -0.2490 | 0.6325 | -0.9516 | 0.0296 | -0.9832 | 0.0103 |
| OLIGO_06759 | BF046377 | PCNA      | -0.2028 | 0.5238 | 0.2420  | 0.4142 | -0.5578 | 0.0269 | -0.5159 | 0.0187 |
| OLIGO_04811 | BF046378 | C10orf9   | 0.6659  | 0.4089 | -0.4999 | 0.5098 | -1.0434 | 0.0990 | -0.5997 | 0.2783 |
| OLIGO_04810 | BF046384 | GMEB2     | -1.4330 | 0.0023 | 1.4998  | 0.0006 | 0.2026  | 0.5859 | -0.7086 | 0.0314 |
| OLIGO_07338 | BF046386 | FAM100B   | 0.5995  | 0.0943 | -0.6625 | 0.0482 | -0.5284 | 0.0600 | -0.5164 | 0.0359 |
| OLIGO_09186 | BF046387 | CYB5D2    | 0.7984  | 0.0952 | -0.6647 | 0.1437 | -0.2954 | 0.4500 | 0.0648  | 0.8538 |
| OLIGO_04821 | BF046391 | C9orf90   | -0.2703 | 0.5668 | 0.6835  | 0.1130 | 0.5559  | 0.1224 | 0.1117  | 0.7252 |
| OLIGO_04818 | BF046398 | PCTK1     | 0.4284  | 0.1768 | -0.1508 | 0.6107 | -0.1759 | 0.4790 | 0.0770  | 0.7232 |
| OLIGO_04813 | BF046401 | CDC40     | 0.7314  | 0.0087 | -0.7091 | 0.0063 | -0.2231 | 0.3098 | 0.1760  | 0.3562 |
| OLIGO_04809 | BF046402 | FBXO40    | 0.5800  | 0.1714 | -0.4174 | 0.2979 | -0.6218 | 0.1257 | -0.7829 | 0.0643 |
| OLIGO_04808 | BF046404 | PDE4D     | -1.1587 | 0.0036 | 1.3594  | 0.0003 | 0.0561  | 0.8567 | -0.0615 | 0.8210 |
| OLIGO_11510 | BF046408 | PHF17     | 0.0137  | 0.9782 | -0.4165 | 0.3621 | -0.2345 | 0.5307 | -0.3109 | 0.3427 |
| OLIGO_10838 | BF046409 | TRIM39    | -0.4655 | 0.4470 | 0.3372  | 0.5462 | 1.4735  | 0.0037 | 0.3543  | 0.4296 |
| OLIGO_04317 | BF046414 | Atp2b1    | 0.1382  | 0.7718 | 0.0534  | 0.9068 | -0.5086 | 0.2540 | -0.7325 | 0.1134 |
| OLIGO_04314 | BF046419 | PGM3      | 0.3840  | 0.1957 | -0.3155 | 0.2556 | 0.4729  | 0.0427 | 0.4250  | 0.0394 |
| OLIGO_09784 | BF046426 | NME1      | -0.3832 | 0.1744 | 1.0023  | 0.0002 | -0.2741 | 0.2205 | -0.2440 | 0.2078 |

|             |          |           |         |        |         |        |         |        |         |        |
|-------------|----------|-----------|---------|--------|---------|--------|---------|--------|---------|--------|
| OLIGO_09103 | BF046427 | EPHX2     | -0.3856 | 0.6179 | 0.4777  | 0.5258 | 2.6141  | 0.0045 | 1.9816  | 0.0178 |
| OLIGO_04320 | BF046429 | LSM6      | 0.0355  | 0.9314 | 0.2579  | 0.5053 | -0.5263 | 0.1046 | -0.3373 | 0.2334 |
| OLIGO_04319 | BF046433 | FLRT2     | -1.6890 | 0.0000 | 1.7453  | 0.0000 | 0.2776  | 0.3841 | 0.0749  | 0.7870 |
| OLIGO_02130 | BF046437 | MTDH      | 0.5216  | 0.1945 | -0.2075 | 0.5779 | -0.9587 | 0.0023 | -0.4130 | 0.1313 |
| OLIGO_04318 | BF046438 | SH3BGRL   | -0.0993 | 0.8147 | -0.0025 | 0.9949 | -0.2251 | 0.4993 | -0.1472 | 0.6129 |
| OLIGO_04311 | BF046444 | WHSC1     | -0.3185 | 0.6621 | 1.1878  | 0.0956 | 0.8170  | 0.1977 | 0.6994  | 0.1937 |
| OLIGO_09098 | BF046450 | CCDC85B   | -0.6725 | 0.0193 | 0.8237  | 0.0021 | -0.3109 | 0.1710 | -0.1297 | 0.5147 |
| OLIGO_04313 | BF046455 | ZNF692    | 0.6040  | 0.1961 | -0.5990 | 0.1757 | -0.1438 | 0.6935 | -0.0829 | 0.7952 |
| OLIGO_08900 | BF046459 | TRPV6     | 0.2909  | 0.2569 | -0.4613 | 0.1236 | -0.1538 | 0.5024 | -0.0574 | 0.7585 |
| OLIGO_04312 | BF046460 | HTATIP    | 0.3579  | 0.4106 | -0.4010 | 0.3382 | -0.5174 | 0.2040 | -0.0985 | 0.7716 |
| OLIGO_02165 | BF046464 | TEX10     | -0.4954 | 0.1145 | -0.3163 | 0.2794 | 0.5930  | 0.0168 | 0.6262  | 0.0040 |
| OLIGO_04316 | BF046467 | ZC3H5     | 0.1333  | 0.6444 | 0.4377  | 0.1149 | -0.2798 | 0.2145 | -0.0154 | 0.9379 |
| OLIGO_04315 | BF046469 | PHKG2     | 0.0656  | 0.7721 | 0.0118  | 0.9556 | 0.1996  | 0.2627 | 0.1382  | 0.3747 |
| OLIGO_09102 | BF046474 | SOCS6     | 0.8436  | 0.1810 | -0.7912 | 0.2224 | -0.0985 | 0.8030 | -0.2352 | 0.4965 |
| OLIGO_07312 | BF046475 | MRPL51    | -0.0789 | 0.8240 | -0.0664 | 0.8413 | -0.6832 | 0.0149 | -0.5972 | 0.0158 |
| OLIGO_04310 | BF046478 | SOCS5     | 0.7395  | 0.0052 | -0.8032 | 0.0012 | 0.1293  | 0.5332 | 0.1928  | 0.2884 |
| OLIGO_10606 | BF046501 | RPL37A    | -0.7822 | 0.0702 | 0.5646  | 0.1620 | -0.7497 | 0.0269 | -0.9737 | 0.0011 |
| OLIGO_08759 | BF046502 | HEXIM2    | 0.1394  | 0.8125 | -0.5410 | 0.3205 | 1.6937  | 0.0002 | 1.4171  | 0.0004 |
| OLIGO_03995 | BF046512 | LOC508512 | 0.2311  | 0.7244 | -0.3071 | 0.6271 | 2.1046  | 0.0151 | 1.8995  | 0.0250 |
| OLIGO_07029 | BF046515 | EBP       | 0.7176  | 0.0284 | -0.7495 | 0.0135 | -0.0256 | 0.9213 | -0.1344 | 0.5473 |
| OLIGO_08025 | BF046519 | UBE1      | -0.0408 | 0.9077 | 0.0713  | 0.8339 | 0.0054  | 0.9866 | -0.2790 | 0.3926 |
| OLIGO_06139 | BF046524 | PRDM4     | 0.0165  | 0.9749 | 0.2719  | 0.5954 | -0.3342 | 0.4970 | 0.1280  | 0.7848 |
| OLIGO_06276 | BF046528 | HOOK1     | 0.4550  | 0.2812 | -0.3924 | 0.3127 | 0.9187  | 0.0049 | 0.9553  | 0.0009 |
| OLIGO_11276 | BF046529 | KIAA1191  | 0.4432  | 0.2618 | -0.5137 | 0.1943 | -1.3554 | 0.0277 | -0.8302 | 0.0987 |
| OLIGO_06264 | BF046534 | SH3YL1    | -0.0894 | 0.8091 | -0.2909 | 0.4011 | 0.8242  | 0.0047 | 0.8994  | 0.0004 |
| OLIGO_06261 | BF046537 | CUTC      | 0.1522  | 0.4880 | -0.3484 | 0.0885 | -0.2138 | 0.2189 | -0.1127 | 0.4551 |
| OLIGO_03005 | BF046541 | RPP14     | 0.4350  | 0.3782 | -0.2679 | 0.5616 | 0.0954  | 0.8069 | 0.0182  | 0.9572 |
| OLIGO_03994 | BF046549 | VDR       | -0.3534 | 0.5334 | 0.4740  | 0.3895 | 0.2300  | 0.6480 | 0.1867  | 0.6948 |
| OLIGO_06246 | BF046550 | BCKDK     | -0.2843 | 0.5523 | 1.2702  | 0.0047 | -0.0490 | 0.8959 | -0.1602 | 0.6253 |
| OLIGO_01666 | BF046551 | RBM23     | 0.2903  | 0.3459 | -0.2801 | 0.3475 | -0.8447 | 0.0568 | -0.5355 | 0.1560 |
| OLIGO_06247 | BF046553 | VARS      | 0.3087  | 0.3445 | -0.1011 | 0.7404 | -0.4119 | 0.1078 | -0.2979 | 0.1838 |
| OLIGO_11282 | BF046564 | GLEIL     | 0.2230  | 0.6500 | 0.2002  | 0.6683 | 0.1553  | 0.6894 | -0.2783 | 0.4143 |
| OLIGO_06282 | BF046565 | JAK3      | -0.2430 | 0.7149 | 0.4075  | 0.5126 | -1.0705 | 0.0405 | -0.9199 | 0.0444 |
| OLIGO_06283 | BF046567 | ZCRB1     | 0.9069  | 0.0293 | -1.2601 | 0.0013 | -0.3488 | 0.2882 | -0.1238 | 0.6645 |

|             |          |           |         |        |         |        |         |        |         |        |
|-------------|----------|-----------|---------|--------|---------|--------|---------|--------|---------|--------|
| OLIGO_06284 | BF046571 | DMTF1     | -0.5424 | 0.3743 | 0.1189  | 0.8336 | -0.3613 | 0.5040 | -0.3490 | 0.5017 |
| OLIGO_09972 | BF046579 | Gab1      | 1.0928  | 0.0526 | 0.1695  | 0.7209 | 0.1658  | 0.6367 | 0.2336  | 0.4439 |
| OLIGO_03993 | BF046580 | VNN1      | -1.7197 | 0.0059 | 0.2884  | 0.6044 | 0.6718  | 0.1740 | 0.5812  | 0.1781 |
| OLIGO_06228 | BF046591 | FLJ25067  | 0.4847  | 0.1290 | -0.0001 | 0.9997 | -0.5480 | 0.0288 | -0.3411 | 0.1169 |
| OLIGO_10417 | BF046592 | SERPING1  | -0.4571 | 0.5469 | 0.5284  | 0.4565 | -1.1918 | 0.0455 | -1.0171 | 0.0512 |
| OLIGO_08772 | BF046594 | TMEM134   | -0.3897 | 0.5775 | 0.4116  | 0.5293 | -0.5521 | 0.3144 | -0.4009 | 0.4041 |
| OLIGO_09104 | BF046597 | HDAC10    | -0.3120 | 0.5357 | 0.5524  | 0.2413 | -0.0508 | 0.8975 | -0.2710 | 0.4330 |
| OLIGO_07042 | BF046598 | BRD4      | -0.1863 | 0.5072 | 0.5198  | 0.0483 | -0.1132 | 0.6070 | -0.3213 | 0.0959 |
| OLIGO_04253 | BF046601 | C3orf52   | 0.3883  | 0.3999 | -0.5380 | 0.2106 | 1.1584  | 0.0016 | 0.8981  | 0.0050 |
| OLIGO_03497 | BF046602 | NOLC1     | 0.6025  | 0.1651 | -0.7096 | 0.0806 | -0.8960 | 0.0086 | -0.8697 | 0.0036 |
| OLIGO_04259 | BF046620 | PRSS23    | 0.4543  | 0.1287 | -0.6019 | 0.0307 | 0.3977  | 0.0933 | 0.7191  | 0.0005 |
| OLIGO_04258 | BF046623 | DCI       | -0.1995 | 0.4893 | 0.1139  | 0.6740 | 0.0665  | 0.7921 | -0.0425 | 0.8589 |
| OLIGO_04249 | BF046626 | HTATSF1   | -0.7719 | 0.0642 | 0.0174  | 0.9645 | -0.1773 | 0.5602 | -0.3248 | 0.2230 |
| OLIGO_09016 | BF046637 | AMD1      | 1.0875  | 0.0004 | -0.8636 | 0.0025 | -0.5770 | 0.0169 | -0.1056 | 0.6142 |
| OLIGO_04747 | BF046644 | SMC1L1    | 0.0210  | 0.9598 | -0.1734 | 0.6676 | -0.0810 | 0.8245 | -0.0630 | 0.8560 |
| OLIGO_04752 | BF046650 | LPP       | -0.0055 | 0.9908 | -0.0792 | 0.8586 | 0.1954  | 0.5949 | 0.2356  | 0.4641 |
| OLIGO_09041 | BF046658 | TIMM50    | 0.1003  | 0.6690 | -0.4504 | 0.0406 | 0.0108  | 0.9533 | 0.0289  | 0.8575 |
| OLIGO_04250 | BF046664 | Usp24     | 0.5608  | 0.0889 | -0.3426 | 0.2660 | -0.5406 | 0.0365 | -0.4752 | 0.0358 |
| OLIGO_04252 | BF046665 | MAPK13    | 0.6925  | 0.1540 | -0.7871 | 0.0833 | 0.9918  | 0.0094 | 0.5858  | 0.0790 |
| OLIGO_07003 | BF046670 | APPBP2    | -0.4945 | 0.2231 | 1.3175  | 0.0006 | 0.2992  | 0.3539 | 0.5199  | 0.0627 |
| OLIGO_11567 | BF046672 | NPTN      | 0.4068  | 0.3283 | -0.3014 | 0.4376 | 0.3945  | 0.2289 | 0.3955  | 0.1669 |
| OLIGO_04746 | BF046685 | TRPC1     | -0.5684 | 0.1579 | 0.6726  | 0.0742 | -0.8367 | 0.0090 | -0.2926 | 0.2896 |
| OLIGO_09355 | BF046691 | LOC617216 | -0.2248 | 0.5945 | 0.9362  | 0.0181 | 0.2197  | 0.5071 | -0.2323 | 0.4246 |
| OLIGO_04753 | BF046692 | WASL      | 0.3215  | 0.1717 | -0.5790 | 0.0083 | 0.1400  | 0.4528 | 0.2609  | 0.1062 |
| OLIGO_04748 | BF046697 | AP1S1     | 0.2180  | 0.3647 | 0.0377  | 0.8669 | -0.2502 | 0.1849 | -0.1571 | 0.3429 |
| OLIGO_04751 | BF046704 | HBQ1      | -0.9602 | 0.0417 | 0.5787  | 0.1887 | 0.3245  | 0.3788 | 0.0480  | 0.8818 |
| OLIGO_04260 | BF046709 | ARFIP1    | 0.2116  | 0.6004 | -0.7039 | 0.0629 | 0.3586  | 0.2636 | 0.5769  | 0.0379 |
| OLIGO_09050 | BF046710 | RRAGD     | 0.3038  | 0.5552 | -0.3255 | 0.5001 | 0.2760  | 0.4544 | 0.3278  | 0.3101 |
| OLIGO_04256 | BF046712 | DYRK3     | -0.0154 | 0.9644 | -0.1512 | 0.6507 | 0.5363  | 0.1863 | 0.4903  | 0.2423 |
| OLIGO_04257 | BF046716 | PFTK1     | 0.1357  | 0.5972 | -0.1813 | 0.4504 | -0.1595 | 0.4281 | -0.0911 | 0.6050 |
| OLIGO_00626 | BF046725 | LOC493869 | -1.5001 | 0.0000 | 1.3957  | 0.0000 | -0.3154 | 0.1969 | -0.1784 | 0.4013 |
| OLIGO_08698 | BF046735 | C12orf43  | 0.3697  | 0.6645 | 0.0317  | 0.9628 | 0.8537  | 0.2472 | 0.6310  | 0.3557 |
| OLIGO_04107 | BF228463 | SETD8     | 0.1859  | 0.6249 | -0.5991 | 0.0925 | 0.1306  | 0.6610 | 0.4947  | 0.0584 |
| OLIGO_04149 | BF228464 | LOC539766 | -0.3590 | 0.5404 | 0.4888  | 0.3728 | 0.5383  | 0.2417 | 0.6588  | 0.1019 |

|             |          |           |         |        |         |        |         |        |         |        |
|-------------|----------|-----------|---------|--------|---------|--------|---------|--------|---------|--------|
| OLIGO_11451 | BF228466 | PCMTD2    | 0.3379  | 0.6408 | -0.7248 | 0.3195 | 0.1053  | 0.8733 | 0.0232  | 0.9705 |
| OLIGO_08233 | BF440165 | bubp43    | -0.4137 | 0.6917 | 0.7814  | 0.4456 | -0.9207 | 0.3604 | -0.2824 | 0.7694 |
| OLIGO_05260 | BF440173 | CR2       | 0.3343  | 0.7957 | -0.2406 | 0.8390 | 1.1099  | 0.1356 | 2.0559  | 0.0028 |
| OLIGO_05266 | BF440176 | STXBP3    | 0.6746  | 0.3689 | -0.4024 | 0.5665 | -0.6848 | 0.2446 | -0.5648 | 0.2730 |
| OLIGO_05312 | BF440184 | MED28     | -0.0409 | 0.9438 | 0.4338  | 0.4241 | -0.1583 | 0.7275 | -0.4932 | 0.2154 |
| OLIGO_10614 | BF440185 | RPL21     | -0.7453 | 0.4127 | 0.3572  | 0.6746 | -0.9378 | 0.1887 | -0.9212 | 0.1404 |
| OLIGO_10355 | BF440188 | GABARAP   | -0.2889 | 0.4315 | 0.8569  | 0.0129 | -0.4939 | 0.0866 | -0.1454 | 0.5638 |
| OLIGO_06891 | BF440190 | RPL17     | -0.3523 | 0.4666 | 0.3381  | 0.4550 | -0.7202 | 0.0580 | -0.5607 | 0.0917 |
| OLIGO_07969 | BF440194 | HNRPF     | 0.5703  | 0.2739 | -0.8151 | 0.0943 | -0.6030 | 0.1420 | -0.4984 | 0.1643 |
| OLIGO_08439 | BF440215 | NFKBIA    | -0.2196 | 0.4393 | 0.9056  | 0.0007 | 0.2758  | 0.2167 | 0.6634  | 0.0007 |
| OLIGO_08183 | BF440221 | FAM108A1  | -0.8448 | 0.0142 | 0.4479  | 0.1625 | 0.0396  | 0.8835 | -0.0917 | 0.6975 |
| OLIGO_06884 | BF440234 | CLK1      | -0.5157 | 0.0624 | 0.1033  | 0.6870 | -0.2178 | 0.3199 | -0.0791 | 0.6764 |
| OLIGO_05325 | BF440242 | FMR1      | 0.4402  | 0.3699 | -0.3200 | 0.4857 | -0.4468 | 0.2461 | 0.0033  | 0.9921 |
| OLIGO_07351 | BF440247 | GOPC      | -0.0810 | 0.8534 | -0.0737 | 0.8600 | -0.3410 | 0.4133 | -0.0133 | 0.9705 |
| OLIGO_05278 | BF440255 | IBRDC2    | 0.3354  | 0.4870 | 0.1489  | 0.7380 | 0.6213  | 0.0959 | 0.5095  | 0.1145 |
| OLIGO_05298 | BF440264 | ZDHHC2    | -0.1292 | 0.8287 | 0.2514  | 0.6496 | -0.5878 | 0.1912 | -0.4534 | 0.2494 |
| OLIGO_05328 | BF440270 | PON2      | -0.8330 | 0.0746 | 0.4348  | 0.3191 | 0.0965  | 0.7918 | 0.0670  | 0.8340 |
| OLIGO_05311 | BF440271 | CHAC2     | -0.1694 | 0.8268 | -0.7246 | 0.2588 | 0.4048  | 0.4121 | 0.0416  | 0.9231 |
| OLIGO_05313 | BF440272 | RGS5      | -1.7903 | 0.0028 | 2.2966  | 0.0000 | 0.5521  | 0.2368 | 0.7062  | 0.0841 |
| OLIGO_05270 | BF440277 | UBD       | 1.3236  | 0.0201 | -1.3922 | 0.0075 | 0.3118  | 0.4763 | -0.1189 | 0.7604 |
| OLIGO_07265 | BF440279 | EIF1B     | -0.2872 | 0.4051 | -0.1629 | 0.6202 | -0.4935 | 0.1524 | -0.4618 | 0.1673 |
| OLIGO_05246 | BF440280 | ANXA3     | 0.6045  | 0.1159 | -0.7556 | 0.0358 | -1.0097 | 0.0009 | -0.7895 | 0.0029 |
| OLIGO_10759 | BF440281 | SMNDC1    | 0.3116  | 0.4621 | -1.1634 | 0.0372 | -0.3068 | 0.4392 | 0.1730  | 0.6342 |
| OLIGO_05279 | BF440284 | RMND5A    | 0.3976  | 0.2253 | -0.2559 | 0.4039 | -0.2120 | 0.4092 | -0.0956 | 0.6708 |
| OLIGO_11215 | BF440295 | TMEM87B   | 0.4693  | 0.1704 | -0.7652 | 0.0631 | -0.3813 | 0.2571 | -0.0267 | 0.9145 |
| OLIGO_11156 | BF440298 | WDR41     | -0.0431 | 0.9548 | 0.6921  | 0.3298 | -0.3782 | 0.5252 | 0.1792  | 0.7310 |
| OLIGO_05272 | BF440307 | RAB11FIP2 | 0.1451  | 0.6571 | 0.1383  | 0.6657 | 0.1951  | 0.4355 | 0.2852  | 0.1927 |
| OLIGO_05247 | BF440308 | NUCB2     | -0.2164 | 0.6239 | -0.1077 | 0.7931 | 1.5350  | 0.0000 | 1.1499  | 0.0002 |
| OLIGO_05293 | BF440316 | NBEAL1    | 0.5383  | 0.6804 | 0.2044  | 0.9210 | 0.4964  | 0.5003 | -0.5301 | 0.4107 |
| OLIGO_05296 | BF440317 | LOC530975 | 0.5781  | 0.0422 | -0.3481 | 0.1930 | -0.0777 | 0.7269 | 0.1735  | 0.3733 |
| OLIGO_05319 | BF440319 | ZBTB25    | 0.1726  | 0.7907 | 0.6455  | 0.3164 | -0.6502 | 0.2907 | -1.3599 | 0.0508 |
| OLIGO_11075 | BF440320 | FANCA     | -0.8126 | 0.1715 | 0.3796  | 0.4942 | -0.9120 | 0.0524 | -0.9692 | 0.0179 |
| OLIGO_06543 | BF440323 | CRI1      | -0.6768 | 0.1375 | 0.3997  | 0.3329 | -0.7376 | 0.1166 | -0.8899 | 0.0993 |
| OLIGO_05310 | BF440325 | TNFRSF1B  | 0.4153  | 0.2577 | -0.1028 | 0.7642 | -0.5851 | 0.0422 | -0.3817 | 0.1296 |

|             |          |               |         |        |         |        |         |        |         |        |
|-------------|----------|---------------|---------|--------|---------|--------|---------|--------|---------|--------|
| OLIGO_05331 | BF440328 | NME1          | 0.3168  | 0.2777 | -0.6805 | 0.0134 | -0.2440 | 0.2880 | -0.2341 | 0.2480 |
| OLIGO_05333 | BF440329 | TMEM129       | -0.3877 | 0.1464 | 0.4591  | 0.0661 | -0.0547 | 0.7936 | -0.1206 | 0.5099 |
| OLIGO_05243 | BF440332 | FLJ30092      | 0.2684  | 0.6401 | -0.3935 | 0.4813 | 0.0980  | 0.8444 | 0.1917  | 0.6896 |
| OLIGO_05273 | BF440333 | RNF14         | -0.3599 | 0.2581 | 0.1539  | 0.6040 | 0.0760  | 0.7615 | 0.0802  | 0.7137 |
| OLIGO_05275 | BF440335 | RAB8B         | 0.0367  | 0.9484 | -0.3784 | 0.4961 | 0.1842  | 0.7286 | -0.3689 | 0.4728 |
| OLIGO_05283 | BF440340 | MRC1L1        | -1.6228 | 0.2264 | 0.8260  | 0.4955 | 1.9278  | 0.2230 | 1.3006  | 0.3467 |
| OLIGO_07224 | BF440341 | IFIT5         | -1.8995 | 0.0001 | 2.4832  | 0.0000 | 0.1050  | 0.7754 | 0.1245  | 0.7002 |
| OLIGO_05289 | BF440343 | MPHOSPH10     | 0.5048  | 0.2953 | -0.5372 | 0.2338 | 0.0949  | 0.8080 | 0.1203  | 0.7238 |
| OLIGO_05267 | BF440345 | SENP8         | 0.5174  | 0.4222 | -0.6207 | 0.3033 | 0.8798  | 0.0820 | 0.6066  | 0.1705 |
| OLIGO_05297 | BF440346 | KENAE         | -0.3698 | 0.2842 | 0.3961  | 0.2091 | 0.7746  | 0.0040 | 0.3404  | 0.1417 |
| OLIGO_05317 | BF440347 | FGD3          | -1.1558 | 0.0037 | 1.8897  | 0.0000 | -0.9563 | 0.0025 | -0.8275 | 0.0027 |
| OLIGO_05301 | BF440349 | LOC652685     | 0.3623  | 0.2675 | 0.4456  | 0.1322 | 0.2551  | 0.3111 | -0.2333 | 0.2977 |
| OLIGO_05309 | BF440353 | LOC616789     | -0.3134 | 0.4214 | 0.0812  | 0.8193 | -0.4706 | 0.1135 | -0.2104 | 0.4228 |
| OLIGO_05314 | BF440356 | LCP2          | -0.5347 | 0.1972 | 1.5961  | 0.0000 | -1.4366 | 0.0000 | -0.8579 | 0.0031 |
| OLIGO_11087 | BF440359 | RPL27A        | -0.4651 | 0.4409 | 0.1873  | 0.7399 | -1.3135 | 0.0057 | -1.6775 | 0.0001 |
| OLIGO_08509 | BF440363 | PSMA3         | 0.0820  | 0.8261 | -1.3226 | 0.0002 | -0.6888 | 0.0190 | -0.4117 | 0.1086 |
| OLIGO_05284 | BF440367 | MGC134367     | 0.0995  | 0.7871 | -0.3369 | 0.3285 | -0.5518 | 0.0565 | -0.1048 | 0.6785 |
| OLIGO_07458 | BF440369 | 40428.00      | 0.8700  | 0.0565 | -1.3846 | 0.0012 | -1.1884 | 0.0009 | -0.8791 | 0.0051 |
| OLIGO_05294 | BF440373 | 0610010K06Rik | 0.3098  | 0.5760 | -0.1620 | 0.7520 | -0.4525 | 0.2888 | 0.0749  | 0.8410 |
| OLIGO_05323 | BF440375 | PAPD4         | 1.1094  | 0.0336 | -1.5812 | 0.0012 | 0.0939  | 0.8186 | 0.3790  | 0.2895 |
| OLIGO_05329 | BF440378 | NCF2          | -0.9263 | 0.1045 | 1.6872  | 0.0017 | -0.1989 | 0.6619 | -0.8539 | 0.0334 |
| OLIGO_10612 | BF440381 | FUS           | -0.5298 | 0.2927 | 0.1261  | 0.7888 | -0.9608 | 0.0152 | -1.1879 | 0.0006 |
| OLIGO_05141 | BF440383 | GNPTAB        | 0.8216  | 0.1978 | -0.9726 | 0.1033 | -0.0017 | 0.9974 | -0.7142 | 0.1062 |
| OLIGO_05144 | BF440385 | LOC641971     | 0.2262  | 0.4478 | -0.5200 | 0.0611 | -0.2494 | 0.2912 | -0.1181 | 0.5654 |
| OLIGO_05303 | BF440386 | Rg9mtd1       | 0.7571  | 0.0283 | -0.8219 | 0.0107 | 0.4970  | 0.0818 | 0.0824  | 0.7353 |
| OLIGO_05198 | BF440393 | RFFL          | 0.1247  | 0.7441 | -0.0956 | 0.7886 | 0.2406  | 0.4233 | 0.0086  | 0.9739 |
| OLIGO_09568 | BF440395 | STK38         | 0.7073  | 0.0724 | -0.5381 | 0.1436 | 0.3242  | 0.2926 | 0.2250  | 0.4040 |
| OLIGO_11646 | BF440401 | HLA-DQA1      | 0.0392  | 0.9277 | 0.8782  | 0.0264 | -0.0457 | 0.8893 | 0.0798  | 0.7816 |
| OLIGO_05214 | BF440403 | C20orf102     | 0.1517  | 0.7825 | -1.2678 | 0.0139 | 0.4148  | 0.3355 | 0.6765  | 0.0732 |
| OLIGO_05191 | BF440407 | CD96          | -0.9584 | 0.3921 | 1.2867  | 0.3632 | 0.2866  | 0.7655 | -0.8880 | 0.3546 |
| OLIGO_05199 | BF440411 | FLJ20032      | -1.0018 | 0.0025 | 0.6881  | 0.0253 | 0.9269  | 0.0005 | 0.5918  | 0.0094 |
| OLIGO_09615 | BF440412 | LOC652614     | 0.2685  | 0.6409 | 0.3820  | 0.4782 | -2.0065 | 0.0000 | -1.6113 | 0.0001 |
| OLIGO_05143 | BF440419 | SFRS12        | 0.3041  | 0.4575 | -0.6073 | 0.1131 | -0.6131 | 0.0564 | -0.3159 | 0.2608 |
| OLIGO_05146 | BF440420 | KLF12         | -0.3160 | 0.4166 | 0.5777  | 0.1110 | -1.3977 | 0.0000 | -0.9070 | 0.0008 |

|             |          |           |         |        |         |        |         |        |         |        |
|-------------|----------|-----------|---------|--------|---------|--------|---------|--------|---------|--------|
| OLIGO_05207 | BF440434 | CMAH      | 0.8066  | 0.0060 | 0.0640  | 0.8140 | -0.4549 | 0.0487 | -0.5404 | 0.0080 |
| OLIGO_07375 | BF440439 | RPL4      | -0.0405 | 0.9451 | 0.0639  | 0.9107 | -0.8113 | 0.1648 | -1.1031 | 0.0702 |
| OLIGO_05192 | BF440445 | BRD4      | 0.2558  | 0.6779 | 0.0547  | 0.9243 | 0.1308  | 0.7863 | 0.2226  | 0.5982 |
| OLIGO_05229 | BF440447 | NUBP1     | -1.5637 | 0.0007 | 1.5998  | 0.0002 | -0.0748 | 0.8363 | -0.1286 | 0.6828 |
| OLIGO_05237 | BF440452 | ACTR6     | 0.3268  | 0.3223 | -0.5493 | 0.0733 | -0.2555 | 0.3297 | -0.4730 | 0.0372 |
| OLIGO_05151 | BF440456 | BRD4      | 0.0850  | 0.8774 | -0.1288 | 0.7989 | -0.0745 | 0.8592 | 0.0492  | 0.8936 |
| OLIGO_05215 | BF440460 | LASS5     | -0.0018 | 0.9954 | 0.2032  | 0.4870 | 0.4925  | 0.0464 | 0.1928  | 0.3717 |
| OLIGO_05196 | BF440466 | HEG1      | -0.6800 | 0.1545 | 0.7325  | 0.1023 | 1.0409  | 0.0061 | 0.5823  | 0.0786 |
| OLIGO_05203 | BF440468 | EGR2      | -2.1188 | 0.0001 | 2.4379  | 0.0000 | -0.0504 | 0.9056 | -0.2624 | 0.4809 |
| OLIGO_10875 | BF440471 | ITPA      | -0.4754 | 0.0928 | -0.2337 | 0.3728 | -0.1440 | 0.5201 | -0.2788 | 0.1509 |
| OLIGO_10575 | BF440480 | MAP1LC3B  | -0.2639 | 0.5347 | 0.2579  | 0.5283 | -0.4143 | 0.2946 | -0.4577 | 0.2366 |
| OLIGO_05193 | BF440485 | ZNFN1A4   | 0.2089  | 0.7917 | 0.1867  | 0.8089 | -0.2423 | 0.7468 | 0.3898  | 0.5939 |
| OLIGO_10202 | BF440490 | PGM1      | 0.2977  | 0.2608 | -0.1257 | 0.6110 | -0.3499 | 0.0957 | -0.3329 | 0.0680 |
| OLIGO_05238 | BF440494 | GPR137B   | -0.5444 | 0.1850 | 0.7928  | 0.0394 | -0.7524 | 0.0208 | -0.3589 | 0.2055 |
| OLIGO_05154 | BF440501 | FLJ36874  | 1.0038  | 0.0004 | -0.7610 | 0.0041 | 0.3418  | 0.1223 | 0.2562  | 0.1857 |
| OLIGO_05216 | BF440504 | PVRL1     | -0.5533 | 0.2739 | 0.5522  | 0.2607 | 0.7645  | 0.1250 | 0.0937  | 0.8223 |
| OLIGO_05220 | BF440505 | LOC507786 | -0.7406 | 0.2131 | 1.6228  | 0.0029 | -1.1449 | 0.0154 | -1.4601 | 0.0005 |
| OLIGO_05232 | BF440513 | EXOC5     | 0.1240  | 0.6926 | -0.3733 | 0.2388 | -0.4840 | 0.1319 | -0.2267 | 0.4135 |
| OLIGO_05201 | BF440526 | FLJ39739  | -0.4431 | 0.6802 | 0.4561  | 0.6584 | 0.0140  | 0.9887 | -0.6787 | 0.4832 |
| OLIGO_05269 | BF440536 | BCL11B    | -0.3946 | 0.4301 | 0.4483  | 0.3305 | 0.3349  | 0.3953 | 0.3062  | 0.3667 |
| OLIGO_05262 | BF440537 | ATF1      | 0.8694  | 0.0408 | -1.0354 | 0.0093 | 0.1142  | 0.7311 | 0.4477  | 0.1243 |
| OLIGO_05307 | BF440550 | LOC518495 | -0.5737 | 0.2035 | 1.1175  | 0.0083 | -0.8259 | 0.0208 | -0.8475 | 0.0065 |
| OLIGO_05147 | BF440558 | UGCGL1    | -0.1617 | 0.5639 | 0.3216  | 0.2183 | 0.5307  | 0.0170 | 0.4976  | 0.0110 |
| OLIGO_05254 | BF440567 | MHCLA2    | 0.2664  | 0.4932 | -0.5887 | 0.1051 | -1.1883 | 0.0001 | -0.6032 | 0.0261 |
| OLIGO_05306 | BF440572 | RAB3GAP1  | 0.5894  | 0.3645 | -0.6942 | 0.2760 | 0.1224  | 0.8389 | -0.4234 | 0.4715 |
| OLIGO_05257 | BF440573 | LOC520186 | -0.9233 | 0.1457 | 1.1876  | 0.0457 | -0.2729 | 0.5831 | -0.1702 | 0.6968 |
| OLIGO_05263 | BF440575 | FLJ20125  | 0.5694  | 0.0453 | -0.6614 | 0.0129 | -0.0092 | 0.9670 | -0.0332 | 0.8647 |
| OLIGO_05259 | BF440576 | RPL5      | -0.2374 | 0.6606 | -0.5206 | 0.3151 | 1.3541  | 0.0039 | 1.0990  | 0.0049 |
| OLIGO_08179 | BF440577 | CREB3L2   | -0.4394 | 0.3924 | 0.5959  | 0.2150 | -0.2830 | 0.4821 | 0.0840  | 0.8115 |
| OLIGO_11064 | BF440584 | ZNF265    | -0.8373 | 0.0354 | 0.1661  | 0.6546 | 0.1193  | 0.7042 | 0.1247  | 0.6494 |
| OLIGO_05268 | BF440586 | RASGRP1   | 0.6851  | 0.4323 | -0.1392 | 0.8626 | -2.5228 | 0.0498 | -2.3309 | 0.0785 |
| OLIGO_05299 | BF440593 | ENAM      | -0.9001 | 0.0883 | 0.8475  | 0.0822 | 1.5106  | 0.0004 | 0.1677  | 0.6414 |
| OLIGO_03594 | BF440603 | DNTTIP2   | 0.4008  | 0.2676 | -0.5495 | 0.1031 | -0.2587 | 0.3647 | 0.0338  | 0.8917 |
| OLIGO_03595 | BF440613 | LR8       | -0.9995 | 0.0370 | 1.5890  | 0.0003 | 0.2866  | 0.4325 | -0.3770 | 0.2384 |

|             |          |               |         |        |         |        |         |        |         |        |
|-------------|----------|---------------|---------|--------|---------|--------|---------|--------|---------|--------|
| OLIGO_03597 | BF440618 | SNTB1         | 0.4078  | 0.1400 | 0.3379  | 0.1862 | -0.2644 | 0.2286 | 0.1788  | 0.3437 |
| OLIGO_03598 | BF440619 | RB1CC1        | 0.5473  | 0.2029 | -0.1458 | 0.7132 | 0.7819  | 0.0172 | 0.7182  | 0.0124 |
| OLIGO_03599 | BF440621 | HFE           | -0.0701 | 0.8686 | 0.0261  | 0.9475 | 0.2291  | 0.4949 | 0.1535  | 0.6026 |
| OLIGO_03596 | BF440622 | C5orf25       | 0.0690  | 0.9021 | -0.5186 | 0.3232 | 0.9980  | 0.0236 | 0.7670  | 0.0468 |
| OLIGO_09928 | BM361817 | PCYT2         | -0.1103 | 0.7892 | 0.2497  | 0.5137 | -0.3493 | 0.2788 | -0.5076 | 0.0718 |
| OLIGO_05525 | BM361824 | CARD11        | -0.7263 | 0.0707 | 0.7323  | 0.0528 | 0.1650  | 0.5996 | -0.0999 | 0.7165 |
| OLIGO_05522 | BM361838 | RPGR          | -0.1157 | 0.8687 | 0.1781  | 0.7902 | -0.9584 | 0.1884 | -1.1487 | 0.1494 |
| OLIGO_05523 | BM361845 | TLR4          | -0.8955 | 0.1903 | 1.1830  | 0.0646 | 0.5416  | 0.3128 | 0.5253  | 0.2680 |
| OLIGO_09929 | BM361858 | PSD4          | -0.2054 | 0.4555 | 0.0133  | 0.9587 | 0.1911  | 0.3757 | 0.1189  | 0.5289 |
| OLIGO_08078 | BM361890 | SUPT6H        | 0.2900  | 0.4527 | -0.5784 | 0.1097 | -0.6806 | 0.0249 | -0.3744 | 0.1580 |
| OLIGO_07315 | BM361903 | RARRES2       | -0.2722 | 0.2686 | 0.6684  | 0.0038 | 0.6326  | 0.0012 | 0.4634  | 0.0069 |
| OLIGO_10708 | BM361926 | SRI           | -0.4606 | 0.1972 | 0.3002  | 0.3666 | -0.9100 | 0.0013 | -0.8692 | 0.0005 |
| OLIGO_10464 | BM361928 | SSB           | 0.0048  | 0.9924 | -0.2520 | 0.5922 | -0.1233 | 0.7548 | -0.2943 | 0.3947 |
| OLIGO_10955 | BM361931 | MMP19         | -0.0573 | 0.8808 | 0.0019  | 0.9957 | -0.2447 | 0.4136 | 0.0896  | 0.7324 |
| OLIGO_07706 | BM361939 | KLHL26        | -0.9974 | 0.0375 | 1.2922  | 0.0040 | 0.3556  | 0.3436 | -0.1538 | 0.6430 |
| OLIGO_09779 | BM361940 | LILRB2        | 1.6718  | 0.0079 | -0.9909 | 0.0915 | -1.2108 | 0.0159 | -0.6876 | 0.1123 |
| OLIGO_01035 | BM361946 | NOSIP         | -1.0847 | 0.0032 | 0.8584  | 0.0124 | 0.3787  | 0.1925 | 0.1327  | 0.5970 |
| OLIGO_09659 | BM361952 | VARSL         | -0.3841 | 0.4771 | -0.5429 | 0.2828 | -0.9430 | 0.0263 | -0.6210 | 0.0943 |
| OLIGO_08232 | BM361956 | GNG11         | 0.8695  | 0.0846 | -0.6079 | 0.1960 | -0.9553 | 0.0209 | -0.3426 | 0.3280 |
| OLIGO_11263 | BM361957 | RPL34         | -0.1379 | 0.7396 | 0.0359  | 0.9271 | -0.7520 | 0.1395 | -0.8278 | 0.1584 |
| OLIGO_05531 | BM361983 | CD3EAP        | -0.2816 | 0.4664 | 0.0671  | 0.8508 | 0.2586  | 0.4749 | -0.1057 | 0.7439 |
| OLIGO_05532 | BM362012 | 9130221J17Rik | 0.7902  | 0.0585 | -0.8498 | 0.0533 | -0.8690 | 0.0876 | -0.5757 | 0.2003 |
| OLIGO_05534 | BM362019 | SETX          | 0.4975  | 0.2581 | -0.1862 | 0.6546 | -0.0514 | 0.8812 | 0.0259  | 0.9314 |
| OLIGO_10725 | BM362023 | GNAI2         | -0.7382 | 0.1657 | 0.6109  | 0.2340 | -0.5785 | 0.2447 | -0.4662 | 0.3266 |
| OLIGO_07270 | BM362027 | GTF2H5        | 0.1921  | 0.5942 | -0.9260 | 0.0062 | -0.3011 | 0.2877 | 0.0355  | 0.8871 |
| OLIGO_05536 | BM362040 | RFX5          | -0.2347 | 0.7709 | -0.6665 | 0.3826 | -0.6462 | 0.3062 | -0.3534 | 0.5226 |
| OLIGO_09935 | BM362041 | AOX1          | 1.1921  | 0.1471 | -1.0555 | 0.1812 | 1.1333  | 0.1523 | 1.5417  | 0.0864 |
| OLIGO_09857 | BM362045 | SLAMF7        | -0.1357 | 0.6539 | -0.1285 | 0.6500 | 0.6241  | 0.0090 | 0.5369  | 0.0118 |
| OLIGO_05591 | BM362051 | MKKS          | -0.0563 | 0.8746 | 0.0659  | 0.8475 | -0.8092 | 0.0643 | -0.6854 | 0.1016 |
| OLIGO_05539 | BM362069 | CREG1         | -0.5597 | 0.4184 | 0.0113  | 0.9862 | 1.5572  | 0.0402 | 1.5519  | 0.0404 |
| OLIGO_05540 | BM362074 | TRAF3IP3      | -0.9102 | 0.3310 | 1.0567  | 0.2277 | -2.3602 | 0.0014 | -2.1465 | 0.0009 |
| OLIGO_11196 | BM362077 | ZNF335        | 0.5652  | 0.3892 | -0.6049 | 0.3246 | -0.5981 | 0.2452 | -0.3433 | 0.4459 |
| OLIGO_10756 | BM362088 | DPYSL2        | -0.8260 | 0.1749 | 1.1954  | 0.0360 | -2.0876 | 0.0000 | -1.8061 | 0.0000 |
| OLIGO_08297 | BM362093 | ABCC5         | 0.2806  | 0.6002 | -0.6361 | 0.2043 | 0.2943  | 0.4865 | 0.0261  | 0.9460 |

|             |          |           |         |        |         |        |         |        |         |        |
|-------------|----------|-----------|---------|--------|---------|--------|---------|--------|---------|--------|
| OLIGO_05542 | BM362113 | XYLT1     | -0.3956 | 0.6791 | 0.1039  | 0.9023 | 0.0250  | 0.9646 | -0.3002 | 0.5263 |
| OLIGO_00423 | BM362140 | C17orf63  | 0.2719  | 0.4700 | -0.3397 | 0.3345 | 0.3472  | 0.2393 | 0.2496  | 0.3338 |
| OLIGO_06668 | BM362152 | CHCHD1    | -0.3398 | 0.4616 | -0.1572 | 0.7156 | 0.0481  | 0.8942 | -0.2866 | 0.3654 |
| OLIGO_05543 | BM362155 | ABHD14A   | 0.3647  | 0.5655 | -0.3637 | 0.5400 | -0.5644 | 0.2567 | -0.2898 | 0.5057 |
| OLIGO_05545 | BM362186 | ITGA2B    | -0.3195 | 0.5493 | -0.1045 | 0.8384 | -0.2428 | 0.5603 | -0.1165 | 0.7496 |
| OLIGO_03026 | BM362192 | ADCK5     | -0.9163 | 0.0027 | 0.4461  | 0.1166 | -0.5124 | 0.0318 | -0.5239 | 0.0123 |
| OLIGO_09629 | BM362196 | NDUFA10   | 0.4728  | 0.2655 | -0.6891 | 0.0830 | 0.1573  | 0.6363 | -0.1140 | 0.6955 |
| OLIGO_05546 | BM362197 | CYBB      | 1.3950  | 0.0936 | -1.0445 | 0.1944 | 1.3150  | 0.0259 | 1.4399  | 0.0056 |
| OLIGO_05550 | BM362209 | LOC642083 | .       | .      | -0.5188 | 0.7725 | 2.0030  | 0.0006 | 1.2596  | 0.0192 |
| OLIGO_05552 | BM362212 | STXBP2    | 1.1441  | 0.0178 | -1.5803 | 0.0004 | -0.0245 | 0.9467 | -0.1692 | 0.5985 |
| OLIGO_06860 | BM362216 | ATOX1     | -0.0406 | 0.9317 | 0.0670  | 0.8798 | -0.0758 | 0.8384 | -0.5617 | 0.0848 |
| OLIGO_09901 | BM362224 | CCDC64    | 0.3893  | 0.5635 | 0.1924  | 0.7625 | 0.5767  | 0.3655 | 0.5505  | 0.3720 |
| OLIGO_10944 | BM362225 | RPL37     | -0.8775 | 0.1275 | -0.0399 | 0.9259 | -1.0532 | 0.1531 | -0.9403 | 0.1959 |
| OLIGO_09920 | BM362236 | PIK3R1    | -0.1463 | 0.7577 | 0.0348  | 0.9361 | 0.1058  | 0.7561 | -0.0938 | 0.7531 |
| OLIGO_06619 | BM362245 | NUDT2     | 0.1491  | 0.7365 | 0.4825  | 0.2350 | 0.0777  | 0.8131 | -0.0250 | 0.9308 |
| OLIGO_09826 | BM362253 | PLVAP     | -1.3349 | 0.0013 | 1.2691  | 0.0010 | 0.9563  | 0.0034 | 0.8540  | 0.0031 |
| OLIGO_03138 | BM362255 | RASA3     | -1.4158 | 0.0041 | 1.6534  | 0.0004 | -1.5065 | 0.0001 | -1.2195 | 0.0004 |
| OLIGO_11672 | BM362267 | AURKB     | 0.2451  | 0.6030 | -0.7303 | 0.0980 | -0.7078 | 0.0558 | -0.5121 | 0.1136 |
| OLIGO_09927 | BM362275 | PITPNM2   | 0.9535  | 0.1798 | -0.8516 | 0.2124 | -0.6324 | 0.3181 | -0.8152 | 0.2071 |
| OLIGO_07416 | BM362278 | POLB      | 0.4504  | 0.2712 | -0.4318 | 0.2594 | 0.1183  | 0.7122 | -0.0707 | 0.8011 |
| OLIGO_05554 | BM362283 | KLHDC5    | 1.0583  | 0.0374 | -0.2604 | 0.5932 | -0.2596 | 0.5085 | -0.3261 | 0.3428 |
| OLIGO_05555 | BM362285 | P2RX5     | 0.2134  | 0.6410 | -0.1091 | 0.7989 | -0.3892 | 0.2784 | -0.5428 | 0.0855 |
| OLIGO_10923 | BM362293 | PPFIBP2   | 0.2047  | 0.5719 | -0.6536 | 0.0525 | 0.0471  | 0.8699 | 0.2018  | 0.4225 |
| OLIGO_10958 | BM362301 | SP140     | 1.3084  | 0.0391 | -0.8940 | 0.1313 | -1.5918 | 0.0014 | -1.4167 | 0.0012 |
| OLIGO_10953 | BM362302 | PSMB10    | 0.0618  | 0.8717 | -0.2313 | 0.5173 | -0.9538 | 0.0017 | -0.4716 | 0.0738 |
| OLIGO_09744 | BM362306 | HSMPP8    | 0.4650  | 0.1640 | -0.7281 | 0.0195 | -0.1317 | 0.6177 | 0.0129  | 0.9551 |
| OLIGO_09679 | BM362315 | HP1BP3    | -0.3100 | 0.5852 | -0.0807 | 0.8798 | 0.2893  | 0.5119 | -0.0728 | 0.8503 |
| OLIGO_10945 | BM362318 | GLG1      | 0.2295  | 0.5724 | -0.5203 | 0.1716 | -0.1580 | 0.6199 | -0.2173 | 0.4360 |
| OLIGO_09939 | BM362320 | C1orf142  | -0.1068 | 0.8343 | -0.3042 | 0.5382 | -0.1705 | 0.6696 | 0.4010  | 0.2564 |
| OLIGO_09941 | BM362336 | REXO1     | -0.0173 | 0.9730 | 0.2445  | 0.6229 | -0.2503 | 0.6010 | -0.3268 | 0.4808 |
| OLIGO_06889 | BM362349 | NDUFA2    | 0.4255  | 0.0755 | -0.4750 | 0.0329 | -0.1923 | 0.3104 | -0.1122 | 0.4993 |
| OLIGO_02867 | BM362352 | PDGFRA    | 0.5180  | 0.2860 | -1.2164 | 0.0076 | 0.1638  | 0.6727 | 0.1524  | 0.6522 |
| OLIGO_10247 | BM362366 | ZBTB4     | 0.6277  | 0.2718 | 0.0072  | 0.9892 | -0.6546 | 0.1437 | -0.6676 | 0.0887 |
| OLIGO_09942 | BM362372 | LOC532442 | -0.1274 | 0.7125 | -0.1569 | 0.6267 | 0.6514  | 0.0182 | 0.4032  | 0.0894 |

|             |          |           |         |        |         |        |         |        |         |        |
|-------------|----------|-----------|---------|--------|---------|--------|---------|--------|---------|--------|
| OLIGO_05557 | BM362375 | LOC339483 | 0.1506  | 0.6433 | -0.4050 | 0.1835 | 0.6117  | 0.0168 | 0.5276  | 0.0184 |
| OLIGO_11170 | BM362383 | PDHB      | 1.0434  | 0.0045 | -1.7175 | 0.0000 | -0.1254 | 0.6636 | -0.1521 | 0.5447 |
| OLIGO_05559 | BM362397 | DMN       | 0.3528  | 0.5659 | 1.2370  | 0.0364 | -2.0786 | 0.0000 | -1.2817 | 0.0027 |
| OLIGO_05560 | BM362403 | CXCR6     | -0.0566 | 0.9487 | -0.0619 | 0.9425 | 1.0350  | 0.0878 | 0.0619  | 0.9091 |
| OLIGO_09855 | BM362407 | ZCCHC8    | -0.0150 | 0.9708 | -0.5003 | 0.1892 | -0.0402 | 0.8992 | 0.4790  | 0.0837 |
| OLIGO_10785 | BM362412 | NICN1     | 0.6177  | 0.0525 | -0.7504 | 0.0119 | -0.4665 | 0.0619 | -0.1081 | 0.6202 |
| OLIGO_05558 | BM362422 | MRPS22    | 0.5082  | 0.0809 | -0.9303 | 0.0006 | 0.1817  | 0.4305 | 0.4104  | 0.0402 |
| OLIGO_07336 | BM362423 | FDPS      | -0.6001 | 0.0440 | 0.6762  | 0.0153 | 0.0199  | 0.9319 | -0.1105 | 0.5880 |
| OLIGO_09614 | BM362425 | WDR79     | 0.4505  | 0.3947 | -0.2304 | 0.6416 | -0.2355 | 0.5701 | -0.0993 | 0.7845 |
| OLIGO_10319 | BM362427 | HLA-DRA   | -0.4201 | 0.3582 | 1.3150  | 0.0021 | -1.0401 | 0.0043 | -1.3981 | 0.0000 |
| OLIGO_10560 | BM362433 | EIF1AX    | 0.4385  | 0.3620 | -0.6263 | 0.1641 | -0.9114 | 0.0159 | -0.5471 | 0.0978 |
| OLIGO_11667 | BM362434 | TRA@      | 0.4479  | 0.4039 | -0.0400 | 0.9373 | 0.8214  | 0.0529 | 0.4771  | 0.1957 |
| OLIGO_05563 | BM362452 | CXCL9     | 1.2413  | 0.3399 | -1.0672 | 0.4079 | -0.2695 | 0.6351 | -0.0181 | 0.9707 |
| OLIGO_09817 | BM362463 | ATXN7     | 0.8798  | 0.5886 | -0.3363 | 0.8270 | 0.8042  | 0.5915 | 0.6175  | 0.6743 |
| OLIGO_05565 | BM362465 | UQCR      | 0.4193  | 0.3389 | -0.0355 | 0.9311 | -0.6660 | 0.0529 | -0.8377 | 0.0055 |
| OLIGO_11197 | BM362469 | KHDRBS1   | -1.0154 | 0.0262 | 0.8182  | 0.0552 | -0.4383 | 0.2198 | -0.5117 | 0.1020 |
| OLIGO_05567 | BM362480 | MDP-1     | -0.0466 | 0.8681 | 0.2580  | 0.3235 | -0.4587 | 0.0389 | -0.1982 | 0.3040 |
| OLIGO_09602 | BM362493 | LMOD1     | -0.1340 | 0.6147 | 0.6928  | 0.0056 | 0.2930  | 0.1606 | 0.4240  | 0.0207 |
| OLIGO_05569 | BM362494 | GBF1      | -0.3224 | 0.4974 | 0.2532  | 0.5687 | 0.0780  | 0.8345 | 0.0827  | 0.8021 |
| OLIGO_05571 | BM362502 | CEECAM1   | 0.4665  | 0.5453 | -0.4440 | 0.5381 | 0.0004  | 0.9995 | -0.4700 | 0.3746 |
| OLIGO_07820 | BM362510 | POP7      | -0.2122 | 0.4585 | 0.4137  | 0.1227 | 0.2648  | 0.2381 | 0.1010  | 0.6069 |
| OLIGO_11195 | BM362528 | NIT1      | -0.4461 | 0.0767 | -0.0662 | 0.7781 | 0.2230  | 0.2601 | -0.1071 | 0.5370 |
| OLIGO_07018 | BM362530 | RPL30     | -0.3524 | 0.4608 | 0.2948  | 0.5094 | -1.4870 | 0.0001 | -1.3960 | 0.0000 |
| OLIGO_10962 | BM362536 | CD72      | 0.1157  | 0.8357 | 0.0022  | 0.9967 | -0.6252 | 0.1532 | -0.2659 | 0.4874 |
| OLIGO_05576 | BM362570 | ZNF622    | 0.6391  | 0.0239 | 0.0499  | 0.8496 | -0.6983 | 0.0017 | -0.4850 | 0.0126 |
| OLIGO_05577 | BM362578 | DGCR6L    | 0.3050  | 0.5018 | 0.2722  | 0.5343 | -0.2097 | 0.5322 | -0.0349 | 0.9055 |
| OLIGO_09925 | BM362579 | ERP29     | 0.5185  | 0.2128 | -0.8675 | 0.0261 | 0.9647  | 0.0032 | 0.6292  | 0.0279 |
| OLIGO_00161 | BM362588 | USMG5     | -0.0001 | 0.9998 | -0.3835 | 0.2763 | 0.1670  | 0.5713 | 0.2225  | 0.3891 |
| OLIGO_09771 | BM362602 | PPP1R7    | -0.1870 | 0.6874 | 0.3548  | 0.4143 | -0.5832 | 0.1097 | -0.2944 | 0.3559 |
| OLIGO_05578 | BM362608 | LOC90826  | -0.1168 | 0.7933 | 0.6995  | 0.0938 | -0.6625 | 0.0603 | -0.0718 | 0.8222 |
| OLIGO_11668 | BM362620 | KIF4A     | -0.3771 | 0.4337 | 0.6019  | 0.2051 | -0.2952 | 0.4948 | -0.3696 | 0.3748 |
| OLIGO_10347 | BM362645 | LOC515773 | -0.7857 | 0.0405 | 0.2907  | 0.4140 | 0.2338  | 0.4404 | -0.2146 | 0.4148 |
| OLIGO_07285 | BM362648 | RPL5      | -0.1963 | 0.7985 | -0.3919 | 0.5858 | -0.6905 | 0.2521 | -0.9698 | 0.0665 |
| OLIGO_09619 | BM362663 | OBFC1     | 0.3676  | 0.3585 | -0.2825 | 0.4424 | 0.2909  | 0.3560 | 0.0962  | 0.7233 |

|             |          |           |         |        |         |        |         |        |         |        |
|-------------|----------|-----------|---------|--------|---------|--------|---------|--------|---------|--------|
| OLIGO_05580 | BM362665 | ENPP2     | 0.5775  | 0.3661 | -0.1554 | 0.7938 | -0.7821 | 0.2030 | -0.6363 | 0.2724 |
| OLIGO_09708 | BM362667 | TMEM16F   | 0.6931  | 0.0730 | -0.3127 | 0.3860 | -0.9498 | 0.0020 | -0.9041 | 0.0007 |
| OLIGO_09590 | BM362685 | TAP1      | 0.0635  | 0.8865 | 0.1635  | 0.6943 | -0.1542 | 0.6584 | -0.0788 | 0.7964 |
| OLIGO_09673 | BM362702 | ZDHHC16   | 0.7883  | 0.0058 | -0.6580 | 0.0137 | 0.5129  | 0.0220 | 0.5525  | 0.0053 |
| OLIGO_05582 | BM362713 | FLJ90013  | -0.1534 | 0.7442 | -0.1232 | 0.7794 | 0.4311  | 0.2421 | 0.3213  | 0.3193 |
| OLIGO_11054 | BM362726 | GSTO1     | -0.6923 | 0.0998 | -0.0612 | 0.8762 | -0.1681 | 0.6096 | -0.1983 | 0.4915 |
| OLIGO_09894 | BM362731 | ABI3      | -0.5310 | 0.1695 | 0.5860  | 0.1407 | 0.2253  | 0.4862 | 0.1680  | 0.5866 |
| OLIGO_05584 | BM362733 | PTPRE     | -0.6739 | 0.2034 | 0.9191  | 0.0672 | 0.0743  | 0.8577 | -0.3728 | 0.3046 |
| OLIGO_05585 | BM362739 | MOBP      | -0.5333 | 0.4707 | 0.2808  | 0.6913 | 0.2497  | 0.7084 | -0.0456 | 0.9427 |
| OLIGO_05586 | BM362743 | SAA1      | -0.1250 | 0.8181 | 0.2105  | 0.6789 | 1.2845  | 0.0027 | 0.6932  | 0.0635 |
| OLIGO_07893 | BM362751 | TRAF5     | -0.3461 | 0.4989 | 0.7216  | 0.1276 | 0.9361  | 0.0255 | 0.0235  | 0.9471 |
| OLIGO_00767 | BM362752 | C20orf18  | 0.0998  | 0.7869 | -0.4152 | 0.2295 | -0.7572 | 0.0091 | -0.3440 | 0.1749 |
| OLIGO_05587 | BM362765 | MLL5      | 0.4564  | 0.2407 | -0.0047 | 0.9897 | -0.6551 | 0.0323 | -0.3580 | 0.1797 |
| OLIGO_07373 | BM362775 | ECRG4     | -1.1081 | 0.0848 | 1.4214  | 0.0156 | 0.6725  | 0.1768 | 0.5456  | 0.2091 |
| OLIGO_09934 | BM362796 | LOC642083 | -0.0854 | 0.8339 | -0.0020 | 0.9957 | -0.3383 | 0.3068 | -0.4306 | 0.1383 |
| OLIGO_09739 | BM362799 | PACAP     | 0.3661  | 0.4026 | -0.4437 | 0.2781 | 0.3999  | 0.2435 | 0.0454  | 0.8796 |
| OLIGO_05588 | BM362809 | CP        | -0.3498 | 0.5061 | 0.6887  | 0.1568 | 0.4038  | 0.3212 | 0.3440  | 0.3340 |
| OLIGO_05589 | BM362811 | ProSAPiP1 | 0.5505  | 0.0941 | -0.2620 | 0.3937 | -0.7537 | 0.0036 | -0.4271 | 0.0585 |
| OLIGO_05593 | BM362838 | SMAPIL    | -0.3713 | 0.2525 | 0.9972  | 0.0011 | -0.5762 | 0.0246 | -0.4251 | 0.0598 |
| OLIGO_09757 | BM362846 | C9orf138  | -0.1102 | 0.8749 | 0.2168  | 0.7512 | 1.1286  | 0.1320 | 0.8625  | 0.2164 |
| OLIGO_09867 | BM362857 | PIM2      | 0.1543  | 0.5912 | -0.0118 | 0.9651 | 0.3745  | 0.0976 | 0.2356  | 0.2324 |
| OLIGO_06830 | BM362859 | PTGIS     | 0.1099  | 0.8286 | -0.2574 | 0.5688 | 0.8492  | 0.0205 | 0.4533  | 0.1569 |
| OLIGO_05597 | BM362861 | TMEM55B   | 0.0735  | 0.7625 | 0.1556  | 0.4940 | 0.1318  | 0.4894 | -0.0029 | 0.9860 |
| OLIGO_07451 | BM362899 | KIAA0690  | -0.4860 | 0.2167 | -0.2883 | 0.4264 | 0.6759  | 0.1071 | 0.6645  | 0.1194 |
| OLIGO_05601 | BM362911 | C10orf54  | 0.6516  | 0.0052 | -0.0565 | 0.7945 | 0.1630  | 0.3711 | 0.0859  | 0.5937 |
| OLIGO_09567 | BM362929 | PRSS2     | -0.1705 | 0.7589 | 0.3492  | 0.5041 | -0.5180 | 0.2350 | -0.2283 | 0.5534 |
| OLIGO_05603 | BM362963 | C1orf37   | -0.1795 | 0.7099 | 0.0301  | 0.9468 | -0.4254 | 0.2610 | -0.3249 | 0.3266 |
| OLIGO_07291 | BM362984 | GPAA1     | 0.3076  | 0.6372 | 0.4194  | 0.4918 | -0.3728 | 0.4668 | -0.0284 | 0.9496 |
| OLIGO_09898 | BM363012 | NPTN      | 0.8897  | 0.0396 | -0.5909 | 0.1434 | 0.4833  | 0.1535 | 0.3474  | 0.2412 |
| OLIGO_05606 | BM363013 | SRBD1     | 0.0300  | 0.9452 | 0.2989  | 0.4531 | 0.2345  | 0.4856 | -0.2155 | 0.4755 |
| OLIGO_09951 | BM363023 | LOC507407 | 0.3550  | 0.4136 | -0.3158 | 0.4389 | 0.4349  | 0.1973 | 0.4731  | 0.1093 |
| OLIGO_02149 | BM363031 | NCALD     | 0.2116  | 0.6326 | -0.5278 | 0.2026 | -0.3209 | 0.3560 | -0.2979 | 0.3280 |
| OLIGO_09621 | BM363046 | DGKZ      | 0.4362  | 0.2332 | -0.2019 | 0.5549 | -0.2694 | 0.3473 | -0.3390 | 0.1770 |
| OLIGO_10660 | BM363051 | FABP3     | 0.4668  | 0.2155 | -0.8741 | 0.0132 | -0.0549 | 0.8535 | -0.4634 | 0.0773 |

|             |          |               |         |        |         |        |         |        |         |        |
|-------------|----------|---------------|---------|--------|---------|--------|---------|--------|---------|--------|
| OLIGO_10350 | BM363057 | SPR           | -0.1675 | 0.7765 | 0.4086  | 0.4708 | 0.2365  | 0.6071 | 0.1484  | 0.7124 |
| OLIGO_11674 | BM363086 | C1orf2        | -0.6492 | 0.0099 | 0.8385  | 0.0004 | -0.2104 | 0.2861 | -0.3142 | 0.0686 |
| OLIGO_07833 | BM363181 | SAPS3         | -0.6271 | 0.0339 | 0.8311  | 0.0027 | 0.0673  | 0.7714 | 0.1005  | 0.6234 |
| OLIGO_09544 | BM363182 | PRODH         | -0.7410 | 0.0536 | 0.1601  | 0.6549 | 0.1835  | 0.5410 | 0.2338  | 0.3737 |
| OLIGO_08112 | BM363845 | MTX1          | -0.0785 | 0.7853 | 0.3545  | 0.1867 | -0.1683 | 0.4600 | -0.3283 | 0.0978 |
| OLIGO_09692 | BM363854 | DKFZp761P0423 | -0.8704 | 0.3426 | 0.4924  | 0.5499 | 0.8272  | 0.1626 | -0.2922 | 0.5688 |
| OLIGO_08269 | BM363855 | PLA2G2D       | 0.5176  | 0.3716 | -0.1868 | 0.7291 | -0.6362 | 0.1540 | -0.4954 | 0.2046 |
| OLIGO_00774 | BM363869 | KIAA1754L     | -0.3196 | 0.4544 | 0.0719  | 0.8546 | -0.7410 | 0.1619 | -1.1050 | 0.1277 |
| OLIGO_09916 | BM363874 | SURF2         | 0.0702  | 0.8664 | 0.1862  | 0.6374 | 0.6875  | 0.0345 | 0.5402  | 0.0601 |
| OLIGO_10556 | BM363883 | BEX2          | -1.5610 | 0.0469 | 2.0572  | 0.0052 | -1.4023 | 0.0240 | -1.9367 | 0.0004 |
| OLIGO_09523 | BM363885 | SPIRE2        | 0.1703  | 0.7347 | -0.3647 | 0.4405 | 0.9859  | 0.0125 | 0.4562  | 0.1858 |
| OLIGO_05500 | BM363888 | RASSF1        | 0.5579  | 0.2517 | -0.1952 | 0.6678 | 0.0697  | 0.8549 | 0.0135  | 0.9677 |
| OLIGO_10203 | BM363900 | RGL2          | -1.4065 | 0.0000 | 1.4767  | 0.0000 | -0.4960 | 0.0663 | -0.1896 | 0.4189 |
| OLIGO_05501 | BM363902 | ZAP70         | -0.0820 | 0.8339 | -0.1506 | 0.6814 | 0.0670  | 0.8280 | -0.2013 | 0.4556 |
| OLIGO_09918 | BM363905 | GCSH          | 0.3138  | 0.6101 | -0.8283 | 0.1504 | 0.4612  | 0.3390 | 0.4284  | 0.3103 |
| OLIGO_10630 | BM363908 | C12orf57      | 0.3040  | 0.4183 | 0.1336  | 0.7016 | -0.9316 | 0.0019 | -0.7951 | 0.0022 |
| OLIGO_10659 | BM363918 | RASSF1        | -0.6202 | 0.0950 | 0.8923  | 0.0092 | -0.5446 | 0.0657 | -0.0285 | 0.9095 |
| OLIGO_09911 | BM363924 | SORBS2        | 0.7639  | 0.2101 | -1.7350 | 0.0126 | -0.7132 | 0.0414 | -0.6015 | 0.0493 |
| OLIGO_05504 | BM363938 | HRB2          | 0.6391  | 0.2431 | -0.1183 | 0.8181 | 0.0699  | 0.8857 | 0.1951  | 0.6782 |
| OLIGO_07326 | BM363942 | VAMP2         | -0.0290 | 0.9108 | 0.4017  | 0.0973 | -0.1184 | 0.5594 | 0.0104  | 0.9533 |
| OLIGO_09921 | BM363955 | PDZK1IP1      | -0.3747 | 0.4206 | 0.8925  | 0.0391 | 0.3591  | 0.3314 | 0.2865  | 0.3690 |
| OLIGO_06538 | BM363963 | XDH           | 0.5608  | 0.2485 | -0.0357 | 0.9370 | -0.5985 | 0.1227 | -0.0324 | 0.9236 |
| OLIGO_05506 | BM363966 | VPS39         | 0.8149  | 0.1113 | -0.0979 | 0.8374 | -0.3460 | 0.3835 | -0.2993 | 0.3893 |
| OLIGO_05507 | BM363968 | CCL3L1        | 0.4584  | 0.1051 | -0.0507 | 0.8470 | -0.1907 | 0.3929 | -0.3684 | 0.0583 |
| OLIGO_10959 | BM363976 | CORO1A        | 0.9828  | 0.1138 | -1.6670 | 0.0043 | -1.9877 | 0.0001 | -1.7584 | 0.0000 |
| OLIGO_05508 | BM363977 | TBC1D9        | 1.0809  | 0.0799 | -1.3570 | 0.0483 | 0.2518  | 0.5824 | 0.3096  | 0.5037 |
| OLIGO_11048 | BM363983 | ATP1A1        | 1.5672  | 0.0018 | -2.1802 | 0.0000 | -0.4478 | 0.2523 | -0.0366 | 0.9149 |
| OLIGO_09848 | BM363992 | ADD1          | -0.0351 | 0.9321 | -0.8468 | 0.0884 | -0.7781 | 0.1290 | -0.3918 | 0.3469 |
| OLIGO_11340 | BM364002 | ITM2C         | 0.4967  | 0.2452 | -0.0030 | 0.9941 | -0.9187 | 0.0060 | -0.2617 | 0.3698 |
| OLIGO_05511 | BM364010 | ASPSCR1       | 0.1638  | 0.7960 | 0.3259  | 0.5825 | -0.6701 | 0.1777 | -0.8298 | 0.0568 |
| OLIGO_05512 | BM364011 | TM7SF3        | 0.1068  | 0.7786 | -0.0530 | 0.8815 | 0.3627  | 0.2327 | -0.1739 | 0.5118 |
| OLIGO_10692 | BM364015 | MYH11         | -1.4476 | 0.0049 | 1.5978  | 0.0009 | 0.5639  | 0.1683 | 0.2022  | 0.5703 |
| OLIGO_05515 | BM364034 | LOC525040     | 0.1252  | 0.8249 | -0.2029 | 0.7016 | -0.1739 | 0.6960 | -0.1176 | 0.7673 |
| OLIGO_05516 | BM364040 | CCDC65        | -0.5909 | 0.3919 | 0.8982  | 0.1644 | 1.2622  | 0.0200 | 0.8617  | 0.0702 |

|             |          |          |         |        |         |        |         |        |         |        |
|-------------|----------|----------|---------|--------|---------|--------|---------|--------|---------|--------|
| OLIGO_10339 | BM364041 | MT       | 0.9342  | 0.0106 | -1.1635 | 0.0007 | -0.4058 | 0.1566 | -0.1687 | 0.5091 |
| OLIGO_09924 | BM364049 | DYNLRB1  | -0.1041 | 0.7596 | 0.4465  | 0.1609 | -0.4849 | 0.0694 | -0.4238 | 0.0699 |
| OLIGO_05518 | BM364056 | CD99L2   | 0.2058  | 0.7378 | -0.3769 | 0.5122 | -0.0332 | 0.9450 | 0.0110  | 0.9793 |
| OLIGO_05367 | BM364411 | DMAP1    | -0.2804 | 0.4772 | -0.6841 | 0.0799 | 0.3258  | 0.2768 | 0.3197  | 0.2129 |
| OLIGO_09623 | BM364414 | FHL3     | 0.1606  | 0.5988 | -0.2156 | 0.4501 | 0.0618  | 0.7961 | 0.1067  | 0.6104 |
| OLIGO_09625 | BM364421 | GALE     | -0.4236 | 0.1481 | 0.0536  | 0.8445 | 0.2463  | 0.2834 | 0.0302  | 0.8806 |
| OLIGO_09634 | BM364434 | SIT1     | -0.0086 | 0.9782 | 0.9107  | 0.0021 | 0.1937  | 0.4390 | 0.1359  | 0.5309 |
| OLIGO_09606 | BM364439 | PDZD11   | 0.0337  | 0.8952 | -0.2612 | 0.2715 | -0.0789 | 0.6971 | -0.0816 | 0.6420 |
| OLIGO_09628 | BM364454 | DTNB     | 1.2099  | 0.1394 | -0.4549 | 0.5541 | -0.1584 | 0.7898 | 0.0610  | 0.9066 |
| OLIGO_01901 | BM364481 | ARFRP1   | 0.4087  | 0.5629 | -0.7834 | 0.2361 | -0.4805 | 0.3854 | -0.2741 | 0.5716 |
| OLIGO_05370 | BM364482 | NNT      | -0.9225 | 0.0615 | 1.0650  | 0.0199 | -0.9470 | 0.0159 | -1.0164 | 0.0027 |
| OLIGO_07060 | BM364483 | USP3     | -0.7704 | 0.0143 | 0.7703  | 0.0089 | -0.7033 | 0.0044 | -0.6886 | 0.0015 |
| OLIGO_09644 | BM364484 | TNIP1    | 0.0833  | 0.8736 | -0.2328 | 0.6345 | 1.1542  | 0.0051 | 0.7296  | 0.0427 |
| OLIGO_09646 | BM364493 | MAGED4   | -0.4382 | 0.5322 | 0.2123  | 0.7476 | -0.0599 | 0.9131 | -0.4618 | 0.3371 |
| OLIGO_07337 | BM364502 | NDUFS5   | -0.7357 | 0.0442 | 0.2999  | 0.3795 | -0.0916 | 0.7487 | -0.4574 | 0.0681 |
| OLIGO_09649 | BM364506 | ITGB7    | -0.1497 | 0.7289 | 0.1728  | 0.6713 | 0.6945  | 0.0428 | 0.1845  | 0.5357 |
| OLIGO_09651 | BM364508 | PARVG    | 1.0344  | 0.0151 | -0.5775 | 0.1458 | -1.0448 | 0.0018 | -0.9057 | 0.0020 |
| OLIGO_09654 | BM364511 | FCHSD1   | -0.1446 | 0.5817 | 0.8016  | 0.0012 | 0.0860  | 0.6766 | -0.1372 | 0.4512 |
| OLIGO_05374 | BM364537 | CEACAM4  | 0.6662  | 0.0548 | 0.3863  | 0.2369 | 0.4202  | 0.1363 | -0.0856 | 0.7238 |
| OLIGO_09662 | BM364545 | JMJD2A   | 0.4066  | 0.2986 | -0.3638 | 0.3355 | -0.3221 | 0.3720 | -0.1775 | 0.5996 |
| OLIGO_09650 | BM364547 | INPP5B   | -0.1715 | 0.6248 | 0.7130  | 0.0298 | -0.6261 | 0.0240 | -0.4072 | 0.0917 |
| OLIGO_10514 | BM364550 | S100A12  | -0.5400 | 0.7087 | -2.7738 | 0.0442 | 1.7736  | 0.0793 | 1.1275  | 0.1886 |
| OLIGO_09653 | BM364553 | RAMP1    | 0.4658  | 0.3867 | 0.2241  | 0.6425 | 0.5642  | 0.3554 | 0.0596  | 0.8828 |
| OLIGO_09665 | BM364563 | CD82     | 0.0688  | 0.8312 | -0.0569 | 0.8506 | 0.4644  | 0.0670 | 0.2646  | 0.2327 |
| OLIGO_05375 | BM364565 | C12orf35 | 1.5374  | 0.0220 | -1.0447 | 0.0830 | 0.5314  | 0.2611 | 0.5124  | 0.2158 |
| OLIGO_10946 | BM364569 | SPBC24   | -0.4586 | 0.2012 | -0.2285 | 0.4910 | -0.7711 | 0.0073 | -0.7242 | 0.0055 |
| OLIGO_05376 | BM364578 | CCL21    | 0.5553  | 0.4139 | -0.8009 | 0.1717 | 0.5362  | 0.0636 | 0.1807  | 0.4740 |
| OLIGO_09670 | BM364584 | LONPL    | 0.5944  | 0.3853 | -1.2267 | 0.0558 | -0.0364 | 0.9463 | -0.1450 | 0.7580 |
| OLIGO_05377 | BM364598 | FAM18B2  | 0.2381  | 0.3473 | 0.0381  | 0.8718 | -0.3182 | 0.1143 | -0.1092 | 0.5293 |
| OLIGO_05378 | BM364614 | KAZALD1  | -0.0536 | 0.9148 | -0.4063 | 0.3542 | 0.9209  | 0.0068 | 0.3494  | 0.2307 |
| OLIGO_05379 | BM364617 | GTPBP1   | 0.6011  | 0.2117 | 0.2341  | 0.6049 | 0.3433  | 0.3624 | 0.6010  | 0.0689 |
| OLIGO_07737 | BM364639 | KIAA0586 | -0.0810 | 0.7954 | -0.0678 | 0.8166 | 0.4678  | 0.0565 | 0.1771  | 0.4089 |
| OLIGO_07576 | BM364649 | MRPL30   | 0.3855  | 0.2014 | -0.2600 | 0.3558 | -0.4740 | 0.0462 | -0.4728 | 0.0229 |
| OLIGO_09681 | BM364653 | ADRA2B   | -0.0075 | 0.9851 | 0.4946  | 0.2659 | 0.4608  | 0.3251 | 0.2088  | 0.5734 |

|             |          |           |         |        |         |        |         |        |         |        |
|-------------|----------|-----------|---------|--------|---------|--------|---------|--------|---------|--------|
| OLIGO_09683 | BM364656 | PHF15     | 1.0515  | 0.0306 | -0.2207 | 0.6275 | -0.4434 | 0.2347 | -0.1905 | 0.5593 |
| OLIGO_07609 | BM364661 | HSPB8     | -0.0821 | 0.8299 | 0.2153  | 0.5458 | -1.1811 | 0.0001 | -1.0245 | 0.0001 |
| OLIGO_09687 | BM364671 | MGC140438 | -1.5408 | 0.0006 | 2.5826  | 0.0000 | 0.1007  | 0.7762 | -0.0469 | 0.8782 |
| OLIGO_09675 | BM364692 | ANKRD13D  | -0.1148 | 0.8921 | 0.0464  | 0.9519 | 0.2633  | 0.7146 | -0.0372 | 0.9568 |
| OLIGO_09695 | BM364709 | PPP1R3D   | -0.9905 | 0.3182 | 0.5162  | 0.5825 | 0.9545  | 0.2897 | 0.4408  | 0.6034 |
| OLIGO_09639 | BM364723 | RAI16     | -0.1380 | 0.7005 | 0.1736  | 0.6048 | 0.1087  | 0.6990 | 0.0657  | 0.7894 |
| OLIGO_09671 | BM364733 | MICAL1    | -0.3548 | 0.4113 | 0.2759  | 0.4925 | -0.4148 | 0.2251 | -0.3856 | 0.1994 |
| OLIGO_10664 | BM364736 | WTIP      | 0.4219  | 0.4547 | -0.5303 | 0.3385 | -0.4345 | 0.4217 | -0.2298 | 0.6570 |
| OLIGO_02310 | BM364753 | NR4A2     | 0.3598  | 0.4480 | 1.1230  | 0.0116 | -0.2705 | 0.4667 | -0.3201 | 0.3252 |
| OLIGO_09699 | BM364755 | C21orf2   | 1.4517  | 0.0520 | -1.0406 | 0.1378 | -0.8234 | 0.1553 | -0.6074 | 0.2310 |
| OLIGO_05386 | BM364762 | DNAJB2    | 0.3151  | 0.5749 | 0.5224  | 0.3295 | -0.3087 | 0.4831 | -0.0826 | 0.8302 |
| OLIGO_09703 | BM364767 | EYA3      | -0.4856 | 0.3748 | -0.0828 | 0.8649 | 1.2830  | 0.1438 | 0.8140  | 0.2441 |
| OLIGO_05387 | BM364769 | TUBD1     | 0.2967  | 0.7012 | 0.0909  | 0.9043 | -0.1455 | 0.8441 | 0.3475  | 0.6294 |
| OLIGO_09704 | BM364776 | RPL5      | -0.3421 | 0.5372 | 0.5708  | 0.2758 | 0.7122  | 0.0962 | 0.9009  | 0.0159 |
| OLIGO_09718 | BM364784 | NCKAP1L   | -0.1454 | 0.6082 | 0.6903  | 0.0095 | 0.3523  | 0.1136 | 0.2945  | 0.1321 |
| OLIGO_09719 | BM364786 | EPSTI1    | 0.2050  | 0.5692 | 0.2922  | 0.3859 | -0.5113 | 0.0705 | -0.4320 | 0.0809 |
| OLIGO_10338 | BM364820 | PPIG      | 1.0397  | 0.1061 | -0.4253 | 0.4791 | 0.6276  | 0.2129 | 0.5055  | 0.2517 |
| OLIGO_05388 | BM364822 | LOC645568 | -0.1038 | 0.8260 | 0.0347  | 0.9385 | 0.3942  | 0.4261 | 0.2825  | 0.5218 |
| OLIGO_05390 | BM364825 | KIRREL3   | -0.1134 | 0.8416 | -0.1520 | 0.7836 | 0.0320  | 0.9398 | -0.1721 | 0.6433 |
| OLIGO_09714 | BM364829 | ZNF385    | -0.3869 | 0.7374 | -0.7658 | 0.5063 | 0.8376  | 0.4506 | 0.1825  | 0.8634 |
| OLIGO_10663 | BM364839 | C1orf151  | 0.2424  | 0.3727 | -1.0855 | 0.0000 | -0.5594 | 0.0095 | -0.2915 | 0.1193 |
| OLIGO_09677 | BM364841 | IL10RA    | -0.7743 | 0.0636 | 1.0050  | 0.0085 | 0.4482  | 0.1584 | 0.0591  | 0.8331 |
| OLIGO_01426 | BM364843 | TPX2      | 0.3276  | 0.4211 | -0.6402 | 0.0932 | -1.2427 | 0.0001 | -1.1121 | 0.0001 |
| OLIGO_09720 | BM364844 | ZNF174    | 0.1430  | 0.8216 | -0.3906 | 0.5103 | 0.0242  | 0.9611 | 0.0342  | 0.9374 |
| OLIGO_09709 | BM364846 | LOC388789 | -0.0886 | 0.7812 | 0.0110  | 0.9705 | -0.1324 | 0.5965 | -0.2693 | 0.2190 |
| OLIGO_09617 | BM364855 | PSMB8     | 0.9178  | 0.0213 | 0.0932  | 0.8016 | -0.4396 | 0.1601 | -0.7967 | 0.0041 |
| OLIGO_05389 | BM364858 | ZNF12     | -0.7643 | 0.5405 | -1.4293 | 0.2512 | 0.1885  | 0.8678 | -0.0182 | 0.9868 |
| OLIGO_09678 | BM364859 | RNF113A   | 0.3980  | 0.3842 | -0.4909 | 0.2770 | 0.7243  | 0.1245 | -0.2517 | 0.5318 |
| OLIGO_05391 | BM364871 | FGL2      | -0.9831 | 0.3758 | -1.0655 | 0.2969 | 1.2126  | 0.0603 | 1.3112  | 0.0195 |
| OLIGO_08119 | BM364879 | LSM4      | -0.0395 | 0.9052 | -0.4300 | 0.1609 | -0.5063 | 0.0554 | -0.4903 | 0.0309 |
| OLIGO_09716 | BM364880 | ARL13B    | 0.1184  | 0.7842 | -0.5722 | 0.1573 | 1.5376  | 0.0000 | 1.0365  | 0.0006 |
| OLIGO_09613 | BM364882 | PROCA1    | 0.5909  | 0.2366 | -0.5980 | 0.2004 | 0.8831  | 0.0244 | 0.1774  | 0.6057 |
| OLIGO_09721 | BM364886 | MYO9A     | -0.5527 | 0.4792 | -0.0086 | 0.9903 | 1.8580  | 0.0013 | 2.0919  | 0.0000 |
| OLIGO_05395 | BM364902 | C13orf10  | 0.1121  | 0.7314 | -0.2937 | 0.3327 | 0.1613  | 0.5338 | 0.0975  | 0.6634 |

|             |          |           |         |        |         |        |         |        |         |        |
|-------------|----------|-----------|---------|--------|---------|--------|---------|--------|---------|--------|
| OLIGO_05397 | BM364905 | ITGB5     | -0.1953 | 0.7319 | 0.8918  | 0.1323 | -0.0031 | 0.9950 | 0.4899  | 0.3333 |
| OLIGO_08213 | BM364907 | BAT4      | -0.1878 | 0.5789 | -0.3627 | 0.2520 | -0.6402 | 0.0161 | -0.6793 | 0.0036 |
| OLIGO_05398 | BM364912 | CLEC2D    | 0.8809  | 0.1232 | -0.1819 | 0.7290 | 0.1559  | 0.7226 | 0.2011  | 0.6010 |
| OLIGO_09870 | BM364921 | HMOX1     | -0.9587 | 0.0309 | 0.8683  | 0.0359 | 1.1446  | 0.0012 | 0.9145  | 0.0028 |
| OLIGO_09729 | BM364946 | ADAM8     | -0.3169 | 0.2640 | 0.9176  | 0.0006 | 0.2375  | 0.2885 | 0.0690  | 0.7263 |
| OLIGO_05400 | BM364950 | ETV6      | -0.5089 | 0.0623 | 0.7148  | 0.0052 | -0.3953 | 0.0647 | -0.3266 | 0.0812 |
| OLIGO_05402 | BM364954 | CCL4L1    | -0.2176 | 0.5242 | 0.5917  | 0.0647 | 0.6706  | 0.0140 | -0.2097 | 0.3778 |
| OLIGO_05405 | BM364981 | PFDN5     | -0.6696 | 0.2317 | 0.4816  | 0.3575 | -0.6039 | 0.1688 | -0.5647 | 0.1417 |
| OLIGO_09738 | BM364993 | SMYD3     | -0.2637 | 0.6647 | 0.6464  | 0.2393 | 0.4282  | 0.3500 | 0.5360  | 0.1966 |
| OLIGO_05406 | BM364995 | MGC128856 | 0.2645  | 0.6484 | -0.3172 | 0.5534 | 0.5516  | 0.3689 | -0.0552 | 0.8986 |
| OLIGO_07555 | BM365007 | IHPK1     | 0.0037  | 0.9890 | 0.2941  | 0.2390 | -0.5474 | 0.0098 | -0.3975 | 0.0314 |
| OLIGO_05408 | BM365025 | SAMHD1    | 0.4889  | 0.4697 | -0.5629 | 0.3698 | 0.8894  | 0.0939 | 0.5137  | 0.2654 |
| OLIGO_07661 | BM365030 | FRG1      | 0.3557  | 0.2604 | -0.9694 | 0.0011 | -0.3439 | 0.1652 | -0.2339 | 0.2806 |
| OLIGO_05407 | BM365043 | LOC652614 | 0.1374  | 0.9076 | 1.0776  | 0.3574 | -0.2520 | 0.6136 | -0.2858 | 0.5130 |
| OLIGO_05409 | BM365054 | BAZ2B     | -0.5321 | 0.4328 | 1.2480  | 0.0350 | 1.6537  | 0.0004 | 1.4929  | 0.0002 |
| OLIGO_09746 | BM365057 | CFP       | 0.3294  | 0.5892 | -0.6277 | 0.2715 | 0.0791  | 0.8686 | 0.1656  | 0.6924 |
| OLIGO_09749 | BM365075 | GEM       | 0.2156  | 0.6968 | -0.2424 | 0.6457 | 0.7796  | 0.2043 | 0.5856  | 0.3097 |
| OLIGO_05410 | BM365100 | PITPNM1   | 0.0015  | 0.9981 | 0.6017  | 0.3158 | -0.0256 | 0.9599 | -0.0451 | 0.9183 |
| OLIGO_09755 | BM365121 | C14orf104 | 0.2164  | 0.6252 | -0.3045 | 0.4571 | 0.0101  | 0.9753 | -0.0177 | 0.9507 |
| OLIGO_07488 | BM365128 | H2AFY     | -0.5487 | 0.2529 | 0.7043  | 0.1437 | -0.5290 | 0.2409 | -0.6623 | 0.1515 |
| OLIGO_10943 | BM365148 | RPL35     | -0.1309 | 0.8855 | -0.2354 | 0.7819 | -1.1556 | 0.1220 | -1.3375 | 0.0379 |
| OLIGO_05414 | BM365149 | FAM76B    | -0.2301 | 0.6142 | 0.2397  | 0.5745 | -0.3187 | 0.3730 | -0.3652 | 0.2436 |
| OLIGO_10486 | BM365159 | RPL22     | -0.5250 | 0.0857 | 0.7816  | 0.0062 | -0.5855 | 0.0155 | -0.4710 | 0.0258 |
| OLIGO_09759 | BM365166 | ZP3       | 0.5217  | 0.5565 | -0.0946 | 0.9108 | 1.4200  | 0.1032 | 1.1426  | 0.1710 |
| OLIGO_09763 | BM365183 | CD3E      | 0.0860  | 0.9568 |         |        | 0.5969  | 0.5811 | 0.2179  | 0.8296 |
| OLIGO_09764 | BM365187 | UBE2J2    | 0.3060  | 0.6121 | -0.0419 | 0.9407 | 0.2570  | 0.5868 | 0.3751  | 0.3651 |
| OLIGO_01258 | BM365199 | SMARCA2   | 0.4318  | 0.1838 | 0.7317  | 0.0158 | -0.7780 | 0.0026 | -0.2411 | 0.2799 |
| OLIGO_05417 | BM365200 | WDFY2     | -0.0738 | 0.9011 | 0.0836  | 0.8798 | 1.1873  | 0.1365 | 0.4515  | 0.4353 |
| OLIGO_05418 | BM365203 | RPS6KA1   | 0.6077  | 0.1273 | -0.4188 | 0.2608 | -0.4351 | 0.1637 | -0.3860 | 0.1596 |
| OLIGO_07190 | BM365231 | GYPC      | -0.1707 | 0.6158 | 0.3437  | 0.2777 | 0.6705  | 0.0132 | 0.3726  | 0.1116 |
| OLIGO_09772 | BM365235 | FBXW4     | 0.0082  | 0.9778 | 0.1811  | 0.5222 | -0.0548 | 0.8115 | -0.0413 | 0.8376 |
| OLIGO_13215 | BM365241 | HLA-DMA   | 0.9484  | 0.0074 | -0.4709 | 0.1540 | -0.9263 | 0.0010 | -0.8845 | 0.0003 |
| OLIGO_07543 | BM365265 | C1R       | -0.1772 | 0.6418 | 0.0077  | 0.9827 | 0.5450  | 0.0685 | 0.5631  | 0.0317 |
| OLIGO_05420 | BM365273 | RNF31     | 0.0227  | 0.9442 | -0.0136 | 0.9644 | -0.0269 | 0.9157 | 0.1998  | 0.3702 |

|             |          |              |         |        |         |        |         |        |         |        |
|-------------|----------|--------------|---------|--------|---------|--------|---------|--------|---------|--------|
| OLIGO_05422 | BM365292 | HIST1H2AG    | -0.6484 | 0.2461 | -0.3082 | 0.5571 | -0.1476 | 0.7171 | -0.5484 | 0.1283 |
| OLIGO_05423 | BM365296 | PDE5A        | -0.2367 | 0.5729 | -0.1705 | 0.6749 | 0.3129  | 0.2809 | 0.5455  | 0.0322 |
| OLIGO_11198 | BM365335 | RNF123       | -0.1164 | 0.6776 | -0.0225 | 0.9313 | 0.0775  | 0.7262 | 0.1954  | 0.3100 |
| OLIGO_05424 | BM365348 | CD2          | -0.6249 | 0.3091 | 0.5614  | 0.3271 | 1.1132  | 0.0231 | 0.6031  | 0.1589 |
| OLIGO_09783 | BM365363 | ETFB         | 0.4350  | 0.4021 | -0.2040 | 0.6760 | -0.0845 | 0.8352 | -0.1523 | 0.6687 |
| OLIGO_05427 | BM365371 | C10orf54     | -1.0968 | 0.0012 | 1.5145  | 0.0000 | -0.4185 | 0.1172 | -0.1055 | 0.6486 |
| OLIGO_08212 | BM365375 | CTF8         | -0.2521 | 0.6925 | 0.1820  | 0.7579 | 0.0484  | 0.9262 | -0.0023 | 0.9958 |
| OLIGO_05431 | BM365409 | MYO1G        | 0.3377  | 0.6716 | -0.7646 | 0.1536 | -0.1214 | 0.7295 | -0.1789 | 0.5581 |
| OLIGO_11231 | BM365429 | CSDE1        | -0.0447 | 0.9098 | -1.2895 | 0.0213 | -0.2476 | 0.5100 | 0.1493  | 0.6704 |
| OLIGO_10609 | BM365446 | SF3B14       | -0.1477 | 0.6106 | -0.2825 | 0.2971 | -0.8517 | 0.0002 | -0.8152 | 0.0001 |
| OLIGO_07370 | BM365495 | M6PRBP1      | 1.0862  | 0.1658 | -1.2748 | 0.1042 | -0.7118 | 0.3072 | -0.4898 | 0.4489 |
| OLIGO_10947 | BM365546 | CD5L         | 0.8243  | 0.1928 | -0.9851 | 0.0884 | 0.3078  | 0.5352 | -0.4847 | 0.2642 |
| OLIGO_06773 | BM365552 | DKFZp762I137 | -1.0660 | 0.1059 | 1.1274  | 0.0676 | -0.2166 | 0.6771 | -0.4514 | 0.3189 |
| OLIGO_07321 | BM365566 | C20orf29     | -0.4637 | 0.4270 | -0.5108 | 0.3523 | 0.0206  | 0.9641 | -0.2244 | 0.5751 |
| OLIGO_05433 | BM365570 | LYL1         | -0.2484 | 0.5594 | -0.1159 | 0.7688 | 0.3681  | 0.2277 | 0.2553  | 0.3389 |
| OLIGO_09952 | BM365594 | MS4A7        | -0.4229 | 0.1396 | 0.9647  | 0.0003 | 0.3227  | 0.1541 | 0.1808  | 0.3575 |
| OLIGO_10972 | BM365595 | RPL38        | 0.3669  | 0.2142 | -0.3229 | 0.2425 | -0.7634 | 0.0011 | -0.6879 | 0.0008 |
| OLIGO_10726 | BM365616 | NOL5A        | -0.1154 | 0.7796 | -0.5033 | 0.1922 | -1.4216 | 0.0000 | -1.2915 | 0.0000 |
| OLIGO_09656 | BM365636 | C6orf204     | -0.0715 | 0.8945 | 0.1212  | 0.8299 | -0.0496 | 0.9013 | 0.4275  | 0.2226 |
| OLIGO_09805 | BM365637 | SPIC         | 1.8860  | 0.0037 | -1.7015 | 0.0051 | 1.0574  | 0.0433 | 0.5218  | 0.2508 |
| OLIGO_07991 | BM365649 | TNPO2        | -1.1307 | 0.0662 | 1.3453  | 0.0196 | 2.5762  | 0.0000 | 1.9723  | 0.0000 |
| OLIGO_06626 | BM365700 | JAK1         | -0.3133 | 0.6030 | 0.6197  | 0.2928 | -1.0641 | 0.0723 | -0.6574 | 0.2170 |
| OLIGO_08298 | BM365709 | NUDC         | -0.0538 | 0.9424 | -0.2687 | 0.6969 | -0.9444 | 0.1003 | -0.5973 | 0.2347 |
| OLIGO_02583 | BM365732 | SON          | 0.6608  | 0.2148 | -0.4211 | 0.3978 | -0.6215 | 0.1367 | -0.4047 | 0.2681 |
| OLIGO_09812 | BM365751 | SPN          | -0.3388 | 0.3312 | 0.1430  | 0.6622 | -0.0679 | 0.8034 | -0.2449 | 0.3027 |
| OLIGO_05434 | BM365799 | COX5B        | 0.4528  | 0.1818 | -0.6156 | 0.0525 | -0.5807 | 0.0292 | -0.5437 | 0.0197 |
| OLIGO_09820 | BM365867 | ACAA2        | 0.2420  | 0.6251 | -0.5671 | 0.2210 | -0.4774 | 0.2189 | -0.2644 | 0.4365 |
| OLIGO_05437 | BM365877 | LOC615620    | 0.1082  | 0.8711 | 0.5316  | 0.3846 | 0.5742  | 0.2584 | 0.3407  | 0.4429 |
| OLIGO_09607 | BM365935 | IL18RAP      | 0.8310  | 0.1551 | -0.4632 | 0.3949 | -0.6668 | 0.1371 | -1.2775 | 0.0012 |
| OLIGO_05438 | BM365938 | SESN2        | 0.2619  | 0.4827 | -0.0885 | 0.7987 | 0.1779  | 0.5524 | -0.4314 | 0.0961 |
| OLIGO_05439 | BM365941 | LOC533757    | -0.8288 | 0.0838 | -0.2169 | 0.6060 | -0.1131 | 0.7238 | 0.3050  | 0.2750 |
| OLIGO_07043 | BM365949 | SEPX1        | 0.8094  | 0.0644 | -1.2218 | 0.0029 | -0.9009 | 0.0087 | -0.7154 | 0.0173 |
| OLIGO_10954 | BM365964 | HLA-DQB1     | 1.0627  | 0.0842 | -0.4184 | 0.4666 | -2.2733 | 0.0000 | -2.4023 | 0.0000 |
| OLIGO_09827 | BM365971 | C10orf76     | -0.1248 | 0.6771 | -0.0556 | 0.8426 | 0.2384  | 0.3111 | 0.4223  | 0.0407 |

|             |          |              |         |        |         |        |         |        |         |        |
|-------------|----------|--------------|---------|--------|---------|--------|---------|--------|---------|--------|
| OLIGO_06713 | BM365979 | CCDC42       | 0.8437  | 0.0608 | -0.2890 | 0.4915 | 0.2323  | 0.5093 | 0.1345  | 0.6626 |
| OLIGO_05443 | BM365981 | TRA@         | -0.3860 | 0.5219 | -0.5856 | 0.3027 | 0.7572  | 0.0654 | 0.6416  | 0.0681 |
| OLIGO_09831 | BM365983 | TFEB         | 0.5320  | 0.2024 | -0.3052 | 0.4293 | -0.1267 | 0.6926 | -0.1634 | 0.5603 |
| OLIGO_10694 | BM365986 | MAF1         | 0.0854  | 0.7401 | -0.5589 | 0.0198 | -0.4914 | 0.0166 | -0.3346 | 0.0588 |
| OLIGO_00886 | BM365991 | hCAP-H2      | -0.2389 | 0.3803 | 0.8940  | 0.0005 | -0.7020 | 0.0012 | -0.4301 | 0.0225 |
| OLIGO_05442 | BM365993 | TLR2         | -0.5854 | 0.3588 | 0.1348  | 0.8289 | 0.5201  | 0.1960 | 0.6270  | 0.0893 |
| OLIGO_10681 | BM365994 | LOC653477    | -1.4211 | 0.0000 | 1.6409  | 0.0000 | 0.0274  | 0.9038 | -0.0531 | 0.7885 |
| OLIGO_09830 | BM365995 | NIP30        | 0.9603  | 0.0031 | -1.1477 | 0.0002 | -0.2382 | 0.3489 | -0.0998 | 0.6531 |
| OLIGO_10148 | BM366000 | SFRS14       | -1.4605 | 0.0562 | 1.2924  | 0.0708 | -0.2216 | 0.7111 | -0.5456 | 0.2978 |
| OLIGO_05445 | BM366011 | IL27RA       | -0.8385 | 0.1296 | 0.4259  | 0.3842 | -1.1179 | 0.0777 | -0.7363 | 0.1869 |
| OLIGO_09589 | BM366029 | HLA-G        | 0.7630  | 0.1453 | -0.0069 | 0.9887 | -1.3264 | 0.0013 | -0.8348 | 0.0204 |
| OLIGO_08206 | BM366035 | ATP5I        | -0.0111 | 0.9865 | -0.3294 | 0.5919 | -0.9393 | 0.0686 | -0.4807 | 0.2865 |
| OLIGO_09838 | BM366037 | CHRN1        | 0.4812  | 0.2402 | 0.0828  | 0.8249 | -0.4821 | 0.2143 | -0.0581 | 0.8612 |
| OLIGO_10766 | BM366064 | CMTM4        | -0.1399 | 0.6945 | -0.3685 | 0.2654 | -0.2418 | 0.3926 | -0.2027 | 0.4072 |
| OLIGO_11333 | BM366086 | SLC25A10     | -0.2998 | 0.4589 | 0.1164  | 0.7584 | 0.9374  | 0.0033 | 0.4933  | 0.0761 |
| OLIGO_09579 | BM366099 | HIST1H4I     | -0.7554 | 0.2815 | 0.6647  | 0.3110 | -1.0107 | 0.0663 | -1.3804 | 0.0043 |
| OLIGO_05448 | BM366103 | NAPA         | 0.3602  | 0.5483 | -0.1040 | 0.8529 | 0.4109  | 0.3821 | 0.3319  | 0.4200 |
| OLIGO_09846 | BM366109 | RP5-860F19.3 | -0.5228 | 0.2752 | 0.6718  | 0.1340 | 1.4479  | 0.0001 | 1.1792  | 0.0005 |
| OLIGO_09847 | BM366115 | MTERFD1      | 0.1776  | 0.6092 | -0.2092 | 0.5195 | 0.4790  | 0.0790 | 0.3255  | 0.1724 |
| OLIGO_09850 | BM366121 | GRAP2        | -0.2475 | 0.4271 | 0.1462  | 0.6160 | 0.6405  | 0.0090 | 0.5071  | 0.0185 |
| OLIGO_05450 | BM366123 | LOC374395    | 0.8701  | 0.0729 | -0.8135 | 0.0730 | -0.1833 | 0.6296 | 0.0654  | 0.8457 |
| OLIGO_07348 | BM366146 | KIAA0141     | -1.1754 | 0.0128 | 1.2700  | 0.0041 | -0.6436 | 0.0814 | -0.6630 | 0.0405 |
| OLIGO_10603 | BM366161 | CKAP1        | -0.1338 | 0.7990 | -0.2476 | 0.6143 | -0.4667 | 0.2574 | -0.2872 | 0.4258 |
| OLIGO_09856 | BM366176 | STARD13      | 0.1899  | 0.4883 | 0.3517  | 0.1702 | 0.2434  | 0.2572 | 0.0286  | 0.8790 |
| OLIGO_09853 | BM366187 | SFI1         | -0.4010 | 0.3929 | 0.3151  | 0.4635 | 0.7250  | 0.0411 | 0.3082  | 0.3172 |
| OLIGO_09663 | BM366193 | WDFY2        | 0.3513  | 0.5577 | -0.3568 | 0.5404 | 0.2773  | 0.6156 | 0.7172  | 0.2127 |
| OLIGO_09808 | BM366194 | CD52         | 1.1982  | 0.0041 | -0.7731 | 0.0474 | -1.1678 | 0.0004 | -1.1653 | 0.0001 |
| OLIGO_11190 | BM366206 | ZBTB40       | 0.3953  | 0.1868 | -0.1132 | 0.6859 | -0.3109 | 0.1853 | -0.2021 | 0.3252 |
| OLIGO_09810 | BM366212 | CHD2         | 0.7794  | 0.0448 | -0.5951 | 0.1010 | -0.1478 | 0.6266 | -0.2749 | 0.3013 |
| OLIGO_05453 | BM366223 | LOC507905    | 0.1781  | 0.7924 | -0.2582 | 0.6833 | -0.2252 | 0.6579 | -0.4206 | 0.3451 |
| OLIGO_05455 | BM366235 | ICAM3        | 0.9256  | 0.0863 | -0.8484 | 0.0948 | -0.0209 | 0.9591 | -0.4155 | 0.2419 |
| OLIGO_09860 | BM366248 | Ppm1f        | 0.1032  | 0.7859 | 0.1532  | 0.6722 | -0.2683 | 0.3670 | -0.3545 | 0.1737 |
| OLIGO_05459 | BM366249 | FYN          | 0.5244  | 0.3221 | 0.2913  | 0.5339 | 0.0016  | 0.9964 | -0.1844 | 0.5577 |
| OLIGO_09861 | BM366251 | MYST4        | 0.3307  | 0.3868 | -0.9108 | 0.0107 | 0.0343  | 0.9097 | -0.0885 | 0.7358 |

|             |          |           |         |        |         |        |         |        |         |        |
|-------------|----------|-----------|---------|--------|---------|--------|---------|--------|---------|--------|
| OLIGO_05460 | BM366252 | TIAF1     | 0.2521  | 0.6323 | -0.3086 | 0.5311 | -0.4615 | 0.2648 | -0.0908 | 0.8038 |
| OLIGO_08165 | BM366255 | NHN1      | -0.1307 | 0.6858 | 0.0377  | 0.9014 | -0.3913 | 0.2846 | -0.4791 | 0.2600 |
| OLIGO_11298 | BM366256 | FES       | 0.3206  | 0.5912 | 0.4320  | 0.4375 | -1.2197 | 0.0100 | -0.9366 | 0.0251 |
| OLIGO_09851 | BM366258 | ANKRD26   | -0.0108 | 0.9838 | -0.8321 | 0.0939 | -0.0338 | 0.9343 | 0.1288  | 0.7194 |
| OLIGO_09863 | BM366270 | MEF2B     | -0.3014 | 0.4750 | 0.6682  | 0.1489 | 0.5901  | 0.1985 | 0.1183  | 0.7379 |
| OLIGO_11147 | BM366272 | TCEAL4    | -0.5387 | 0.4769 | 0.6932  | 0.3279 | 0.8213  | 0.1706 | 0.2738  | 0.6209 |
| OLIGO_05458 | BM366281 | EPM2AIP1  | 0.4442  | 0.2571 | -0.3414 | 0.3515 | -0.0062 | 0.9838 | -0.0108 | 0.9684 |
| OLIGO_09774 | BM366289 | MPEG1     | -0.3079 | 0.5825 | 0.1765  | 0.7391 | 1.3548  | 0.0019 | 1.0232  | 0.0074 |
| OLIGO_09862 | BM366290 | KIF5B     | 0.6879  | 0.2928 | -0.8514 | 0.1490 | 0.2389  | 0.5967 | 0.4424  | 0.2676 |
| OLIGO_09864 | BM366296 | CENTD2    | 0.4529  | 0.4881 | -0.7990 | 0.1812 | 0.7723  | 0.1125 | 0.5086  | 0.2304 |
| OLIGO_05464 | BM366313 | DHX38     | 0.2129  | 0.7455 | -0.3692 | 0.5474 | -0.4349 | 0.3977 | -0.5931 | 0.1880 |
| OLIGO_09818 | BM366338 | IL12RB1   | -0.0314 | 0.9276 | -0.1021 | 0.7518 | 0.6381  | 0.0223 | 0.1341  | 0.5766 |
| OLIGO_05466 | BM366349 | GPR88     | -0.9489 | 0.1189 | 1.1501  | 0.0435 | 1.1959  | 0.0140 | 0.0326  | 0.9399 |
| OLIGO_07316 | BM366355 | CHRAC1    | -0.1610 | 0.6116 | 0.2518  | 0.3961 | -0.5929 | 0.0174 | -0.4607 | 0.0347 |
| OLIGO_10950 | BM366368 | ITGAD     | 0.7284  | 0.2390 | 0.2024  | 0.7417 | 0.3573  | 0.4333 | 0.3850  | 0.3378 |
| OLIGO_10573 | BM366374 | RPL39     | 0.0189  | 0.9709 | 0.1886  | 0.6974 | -1.0845 | 0.0079 | -1.1107 | 0.0019 |
| OLIGO_11296 | BM366390 | CHST11    | 0.4633  | 0.2112 | -0.2285 | 0.4737 | 0.2102  | 0.5133 | 0.3136  | 0.3542 |
| OLIGO_09859 | BM366406 | TPM3      | 0.2440  | 0.4704 | -0.0213 | 0.9488 | 0.3257  | 0.1897 | 0.0746  | 0.7285 |
| OLIGO_09869 | BM366414 | KIAA1797  | -0.3320 | 0.3262 | 0.0732  | 0.8170 | 0.2628  | 0.3257 | 0.0429  | 0.8536 |
| OLIGO_09839 | BM366430 | GIMAP1    | -0.1575 | 0.6668 | 0.0289  | 0.9339 | 0.5923  | 0.0384 | 0.5520  | 0.0324 |
| OLIGO_05468 | BM366436 | GNLY      | -0.7090 | 0.1866 | 1.3926  | 0.0057 | -0.5513 | 0.1900 | -0.6706 | 0.0689 |
| OLIGO_08197 | BM366445 | FLOT2     | 0.5921  | 0.0390 | -0.5640 | 0.0345 | -0.3123 | 0.1695 | -0.0252 | 0.9003 |
| OLIGO_10736 | BM366447 | AP4M1     | 0.0817  | 0.8619 | -0.3677 | 0.4027 | -0.0992 | 0.7879 | 0.2648  | 0.4166 |
| OLIGO_05470 | BM366451 | PPFIBP1   | 0.4211  | 0.2453 | 0.2907  | 0.3934 | -0.4676 | 0.1004 | -0.2892 | 0.2449 |
| OLIGO_09592 | BM366457 | LOC54103  | -0.2753 | 0.6010 | 0.3816  | 0.4205 | -0.4941 | 0.2435 | -0.6046 | 0.0936 |
| OLIGO_09875 | BM366461 | LOC509006 | 0.7120  | 0.1627 | 0.0002  | 0.9996 | -1.0542 | 0.0086 | -0.6741 | 0.0544 |
| OLIGO_05471 | BM366469 | RPL5      | -0.2028 | 0.6745 | 0.4586  | 0.3083 | 0.6689  | 0.0444 | 0.1849  | 0.5245 |
| OLIGO_07744 | BM366470 | GSTM5     | -0.6106 | 0.0265 | 0.8264  | 0.0013 | 0.0483  | 0.8247 | 0.1486  | 0.4345 |
| OLIGO_05473 | BM366488 | MYADM     | -0.5128 | 0.1878 | 0.3472  | 0.3401 | -0.2582 | 0.3971 | -0.2967 | 0.2665 |
| OLIGO_11101 | BM366490 | KIAA0907  | -0.5602 | 0.4424 | 0.3041  | 0.6556 | 0.7659  | 0.1841 | 0.4010  | 0.4239 |
| OLIGO_09657 | BM366497 | EML3      | 0.5286  | 0.0616 | -0.6335 | 0.0165 | -0.1763 | 0.4219 | 0.1261  | 0.5121 |
| OLIGO_09832 | BM366508 | RC74      | -0.6018 | 0.2057 | 0.2080  | 0.6340 | 0.7528  | 0.1077 | 0.5178  | 0.2228 |
| OLIGO_09854 | BM366517 | SLC15A3   | 0.5348  | 0.1030 | -0.3055 | 0.3162 | 0.2854  | 0.2733 | -0.0622 | 0.7867 |
| OLIGO_09753 | BM366526 | GPR114    | 0.1880  | 0.5533 | -0.1557 | 0.5996 | -0.0241 | 0.9228 | -0.1193 | 0.5834 |

|             |          |          |         |        |         |        |         |        |         |        |
|-------------|----------|----------|---------|--------|---------|--------|---------|--------|---------|--------|
| OLIGO_05474 | BM366528 | ITSN2    | 0.6880  | 0.0363 | 0.5474  | 0.0782 | -0.0868 | 0.7351 | -0.1712 | 0.4461 |
| OLIGO_06803 | BM366532 | ANG      | -1.5254 | 0.0109 | 1.6687  | 0.0029 | 0.4732  | 0.3141 | 0.3747  | 0.3735 |
| OLIGO_09767 | BM366535 | FAM44A   | 0.1866  | 0.7623 | -0.7180 | 0.2136 | 0.1733  | 0.7202 | -0.1297 | 0.7602 |
| OLIGO_05476 | BM366536 | IRF1     | 0.0686  | 0.8759 | 0.0637  | 0.8766 | -0.5546 | 0.1103 | -0.5097 | 0.0918 |
| OLIGO_09794 | BM366539 | DDX39    | -0.0670 | 0.8905 | -0.1779 | 0.7037 | 0.1613  | 0.7133 | 0.2091  | 0.6265 |
| OLIGO_10356 | BM366562 | KLF10    | 0.4095  | 0.3826 | -0.8263 | 0.0600 | -0.4742 | 0.1976 | -0.0065 | 0.9838 |
| OLIGO_11248 | BM366577 | ALDH2    | 0.8343  | 0.2818 | 0.0216  | 0.9763 | -0.9953 | 0.1015 | -0.3933 | 0.4592 |
| OLIGO_05477 | BM366578 | MAD2L2   | 0.2426  | 0.3749 | -0.2948 | 0.2467 | -0.1258 | 0.5605 | -0.0413 | 0.8258 |
| OLIGO_09881 | BM366588 | MKNK2    | -0.4201 | 0.2070 | 0.3136  | 0.3111 | 0.1443  | 0.5841 | 0.3728  | 0.1040 |
| OLIGO_05478 | BM366593 | DNAA3    | 0.4281  | 0.1681 | -0.8310 | 0.0042 | 0.3840  | 0.1187 | -0.0467 | 0.8268 |
| OLIGO_05479 | BM366600 | APBB1IP  | -1.4011 | 0.0161 | 1.7368  | 0.0014 | -0.8830 | 0.0548 | -1.4336 | 0.0004 |
| OLIGO_05483 | BM366612 | PIAS4    | -0.1592 | 0.8354 | 0.6825  | 0.3731 | 1.2848  | 0.1120 | 1.2910  | 0.1058 |
| OLIGO_02685 | BM366655 | CSK      | -0.1529 | 0.7334 | 0.5286  | 0.2726 | -1.0198 | 0.1453 | -0.6559 | 0.2607 |
| OLIGO_09873 | BM366661 | LY96     | -1.2947 | 0.0052 | 2.2246  | 0.0000 | -0.4229 | 0.2519 | -0.1160 | 0.7243 |
| OLIGO_10696 | BM366675 | DAB2IP   | -1.0289 | 0.3059 | 1.1890  | 0.2302 | -0.4475 | 0.6273 | -0.1623 | 0.8539 |
| OLIGO_09728 | BM366695 | MRPS15   | -0.0027 | 0.9950 | -0.8498 | 0.0370 | 0.1113  | 0.7458 | 0.1881  | 0.5291 |
| OLIGO_09754 | BM366707 | IFI35    | 0.8573  | 0.0053 | -0.2898 | 0.3115 | -0.4634 | 0.0536 | -0.3372 | 0.1060 |
| OLIGO_13214 | BM366713 | STAT3    | 0.6575  | 0.0714 | -1.0428 | 0.0023 | -1.2650 | 0.0000 | -0.6223 | 0.0130 |
| OLIGO_06706 | BM366715 | TOMM7    | 0.3231  | 0.4107 | -0.5691 | 0.1217 | -0.5358 | 0.0822 | -0.6352 | 0.0187 |
| OLIGO_07648 | BM366737 | LOC91689 | -0.2509 | 0.3513 | -0.4498 | 0.0744 | -0.3594 | 0.0888 | -0.4149 | 0.0250 |
| OLIGO_07483 | BM366740 | BAG2     | 1.0114  | 0.0498 | -1.2285 | 0.0110 | -0.4823 | 0.2319 | -0.4268 | 0.2270 |
| OLIGO_09792 | BM366750 | TLK2     | 0.1176  | 0.8166 | -0.2303 | 0.6379 | 0.1329  | 0.7722 | -0.0079 | 0.9854 |
| OLIGO_10951 | BM366758 | CD3Z     | -0.9908 | 0.0398 | 0.9820  | 0.0290 | 0.3906  | 0.3108 | 0.1444  | 0.6707 |
| OLIGO_09897 | BM366759 | NR4A1    | 0.7673  | 0.0091 | -0.4430 | 0.1047 | 0.2025  | 0.3854 | 0.1218  | 0.5456 |
| OLIGO_09822 | BM366767 | ZXDB     | 0.2407  | 0.5987 | -0.2908 | 0.4949 | -0.2556 | 0.4676 | -0.0578 | 0.8511 |
| OLIGO_07770 | BM366785 | SART3    | 0.0023  | 0.9924 | 0.2098  | 0.3403 | -0.4925 | 0.0086 | -0.3727 | 0.0227 |
| OLIGO_11713 | BM366786 | ACP6     | 0.0812  | 0.8380 | -0.0359 | 0.9235 | -0.1471 | 0.6392 | -0.3614 | 0.1860 |
| OLIGO_09841 | BM366792 | GZMH     | 0.4815  | 0.1211 | -0.0531 | 0.8547 | 0.0091  | 0.9702 | -0.0767 | 0.7185 |
| OLIGO_05487 | BM366796 | WHDC1    | 0.1754  | 0.6771 | -0.0472 | 0.9051 | 0.1400  | 0.6813 | -0.2156 | 0.4693 |
| OLIGO_09782 | BM366819 | CD244    | -0.2783 | 0.5556 | 0.9495  | 0.0320 | 0.9303  | 0.0139 | 0.1593  | 0.6344 |
| OLIGO_07383 | BM366855 | DCPS     | 0.1211  | 0.7775 | 0.1790  | 0.6655 | 0.1807  | 0.5886 | -0.0656 | 0.8224 |
| OLIGO_09807 | BM366861 | GPSM3    | 0.3341  | 0.5887 | -0.0771 | 0.8958 | -0.5485 | 0.3470 | -0.4747 | 0.3954 |
| OLIGO_11680 | BM366863 | PSMB9    | -0.6884 | 0.2237 | 1.0714  | 0.0432 | -1.2483 | 0.0052 | -0.7969 | 0.0451 |
| OLIGO_09582 | BM366878 | C6orf89  | -0.5180 | 0.2825 | 0.3319  | 0.4614 | 1.2233  | 0.0013 | 1.0227  | 0.0021 |

|             |               |           |         |        |         |        |         |        |         |        |
|-------------|---------------|-----------|---------|--------|---------|--------|---------|--------|---------|--------|
| OLIGO_05492 | BM366880      | TRERF1    | 0.8950  | 0.0954 | -0.7877 | 0.1165 | 0.0766  | 0.8552 | -0.0247 | 0.9464 |
| OLIGO_03329 | BM366884      | CALM1     | 0.4869  | 0.4134 | -0.0021 | 0.9969 | -2.3752 | 0.0000 | -2.2773 | 0.0000 |
| OLIGO_07329 | BM366885      | DRG1      | 0.6848  | 0.0825 | -1.1195 | 0.0025 | -0.5741 | 0.0633 | -0.2457 | 0.3632 |
| OLIGO_09866 | BM366887      | KIF13B    | 0.5993  | 0.2680 | -0.5158 | 0.2962 | 0.6519  | 0.0742 | 0.7165  | 0.0252 |
| OLIGO_05493 | BM366888      | CCR1      | 0.1234  | 0.7850 | 0.3586  | 0.3967 | 0.5613  | 0.1138 | 0.7184  | 0.0210 |
| OLIGO_09906 | BM366897      | TNRC6B    | 0.3622  | 0.6369 | -0.3916 | 0.5854 | 0.0978  | 0.8709 | -0.2054 | 0.6967 |
| OLIGO_11673 | BM366906      | TNFAIP8L2 | 0.0007  | 0.9989 | -0.0372 | 0.9338 | 0.0428  | 0.9190 | -0.1883 | 0.6487 |
| OLIGO_07500 | BM366911      | ATXN2L    | -0.3768 | 0.5072 | 0.3678  | 0.5095 | 0.1163  | 0.7773 | -0.1049 | 0.7708 |
| OLIGO_09907 | BM366923      | TncRNA    | 0.4963  | 0.1072 | -0.8594 | 0.0028 | 0.1625  | 0.5008 | 0.0742  | 0.7228 |
| OLIGO_05440 | BM366953      | URP2      | 0.6813  | 0.2095 | -0.8123 | 0.1363 | 0.4186  | 0.3869 | 0.2994  | 0.5082 |
| OLIGO_06943 | BM366972      | SF3B5     | -0.6919 | 0.1268 | 1.0111  | 0.0173 | -0.3619 | 0.3079 | -0.7939 | 0.0109 |
| OLIGO_07045 | BP22000600403 | C20orf149 | -0.4819 | 0.1377 | 0.3964  | 0.1917 | -0.2424 | 0.3404 | -0.2672 | 0.2302 |
| OLIGO_08325 | BP22000601003 | LOC508082 | -0.1373 | 0.6808 | -0.0228 | 0.9418 | -0.0892 | 0.7432 | -0.4172 | 0.0817 |
| OLIGO_11111 | BP22000601703 | ERH       | -0.5777 | 0.3227 | 0.2946  | 0.5904 | -0.7843 | 0.1713 | -0.6483 | 0.2318 |
| OLIGO_08124 | BP22000603303 | POLG2     | -0.5614 | 0.2239 | -0.8807 | 0.0777 | -0.0278 | 0.9403 | 0.0228  | 0.9486 |
| OLIGO_03605 | BP22000607803 | NEDD4     | 0.5970  | 0.0482 | -0.3380 | 0.2291 | -0.3334 | 0.1615 | 0.0062  | 0.9762 |
| OLIGO_11345 | BP22000608203 | C14orf166 | -0.1477 | 0.6803 | 0.3653  | 0.2737 | -0.6363 | 0.0254 | -0.7277 | 0.0033 |
| OLIGO_03606 | BP22000609503 | RCL1      | 0.1429  | 0.7721 | -0.3333 | 0.4906 | -0.0247 | 0.9571 | 0.0946  | 0.8317 |
| OLIGO_03607 | BP22000609703 | MRPS36    | 0.6763  | 0.0222 | -0.9034 | 0.0011 | -0.1598 | 0.4922 | 0.0178  | 0.9302 |
| OLIGO_03608 | BP22000611003 | CCNH      | 0.0610  | 0.7990 | -0.5008 | 0.0251 | -0.0486 | 0.7978 | 0.0681  | 0.6789 |
| OLIGO_06801 | BP22000611103 | RHOH      | -0.1321 | 0.7864 | 0.5294  | 0.2461 | -0.8018 | 0.0364 | -0.5606 | 0.0944 |
| OLIGO_03609 | BP22000611303 | EP400     | -0.2297 | 0.2721 | 0.3907  | 0.0460 | -0.2887 | 0.0793 | -0.1381 | 0.3364 |
| OLIGO_03613 | BP22000615303 | FBXL5     | -1.8907 | 0.0003 | 1.9076  | 0.0001 | 2.3408  | 0.0000 | 2.0301  | 0.0000 |
| OLIGO_10735 | BP22000615403 | LOC514170 | 1.3486  | 0.0158 | -1.7160 | 0.0011 | -0.9031 | 0.0389 | -0.4168 | 0.2754 |
| OLIGO_10987 | BP22000618003 | H1FX      | -0.1166 | 0.7588 | 0.5003  | 0.1592 | -0.9051 | 0.0025 | -0.8613 | 0.0010 |
| OLIGO_10611 | BP22000618103 | SERF2     | -0.8019 | 0.1918 | 0.3475  | 0.5450 | 0.3535  | 0.4632 | 0.0170  | 0.9681 |
| OLIGO_03615 | BP22000618403 | HBEGF     | 0.4491  | 0.4411 | -0.5378 | 0.3241 | 1.7686  | 0.0001 | 1.6809  | 0.0000 |
| OLIGO_11354 | BP22000618703 | GYG2      | 0.0647  | 0.9106 | -0.5098 | 0.3439 | -0.0173 | 0.9694 | -0.1004 | 0.7993 |
| OLIGO_07823 | BP22000618803 | DHRS3     | -0.1709 | 0.5883 | -0.0270 | 0.9280 | 1.2663  | 0.0137 | 0.9814  | 0.0384 |
| OLIGO_06630 | BP230002B10B6 | UQCRB     | 0.7199  | 0.0870 | -0.2544 | 0.5172 | -0.6708 | 0.0422 | -0.5162 | 0.0740 |
| OLIGO_01364 | BP230002B20E3 | SLC25A26  | 0.6591  | 0.0681 | -0.3327 | 0.2718 | -0.1352 | 0.6055 | 0.0198  | 0.9338 |
| OLIGO_00220 | BP230002B20E6 | NFX1      | 0.0247  | 0.9253 | -0.0351 | 0.8866 | 0.4173  | 0.0436 | 0.1449  | 0.4228 |
| OLIGO_07428 | BS29000103003 | PLK3      | -0.3393 | 0.4848 | 0.1475  | 0.7496 | -0.2416 | 0.5890 | -0.3163 | 0.4672 |
| OLIGO_05155 | BS29000110703 | RHOH      | -0.5051 | 0.3930 | 1.4543  | 0.0088 | -0.7116 | 0.1307 | -1.1008 | 0.0076 |

|             |                |           |         |        |         |        |         |        |         |        |
|-------------|----------------|-----------|---------|--------|---------|--------|---------|--------|---------|--------|
| OLIGO_10528 | BS29000110903  | FAU       | -0.3372 | 0.3667 | 0.4903  | 0.1602 | -0.5121 | 0.0822 | -0.9433 | 0.0003 |
| OLIGO_11647 | BS29000113203  | Abhd12    | 0.7503  | 0.0303 | -1.1107 | 0.0006 | -0.2999 | 0.2684 | -0.6203 | 0.0091 |
| OLIGO_05161 | BS29000113903  | SUPT4H1   | 0.1515  | 0.7047 | -0.1316 | 0.7280 | -0.0863 | 0.7973 | -0.0937 | 0.7666 |
| OLIGO_05165 | BS29000115903  | USP48     | 0.1910  | 0.7915 | -1.2506 | 0.0586 | 2.1349  | 0.0015 | 0.9996  | 0.1156 |
| OLIGO_05166 | BS29000116103  | HOP       | 0.0182  | 0.9671 | -0.2603 | 0.5272 | -0.3891 | 0.2641 | -0.3156 | 0.2992 |
| OLIGO_11399 | BS29000117603  | VASP      | 0.3376  | 0.3949 | -0.0561 | 0.8797 | -0.0496 | 0.8731 | -0.3661 | 0.1789 |
| OLIGO_05171 | BS29000119803  | BoLA-DRB3 | 0.0780  | 0.8911 | 0.8830  | 0.0969 | -1.1125 | 0.0136 | -1.2297 | 0.0018 |
| OLIGO_11648 | BS29000120303  | SMAD4     | -0.1300 | 0.6154 | -0.2046 | 0.3954 | -0.6576 | 0.0014 | -0.3695 | 0.0382 |
| OLIGO_05175 | BS29000122803  | PSTPIP2   | 1.5468  | 0.0096 | -1.9022 | 0.0005 | 0.9640  | 0.0412 | 0.3224  | 0.4346 |
| OLIGO_05176 | BS29000123803  | MCART1    | 0.5829  | 0.0656 | 0.1366  | 0.6523 | 0.2636  | 0.2855 | 0.2826  | 0.1953 |
| OLIGO_05177 | BS29000123903  | ANKRD44   | -0.3247 | 0.5525 | 0.3664  | 0.4902 | -0.9644 | 0.1233 | -1.0593 | 0.1127 |
| OLIGO_11650 | BS29000124903  | LOC618283 | -1.2071 | 0.0045 | 1.3455  | 0.0007 | 0.1147  | 0.7298 | -0.3358 | 0.2519 |
| OLIGO_11343 | BS29000127203  | ZNF192    | -0.5876 | 0.4083 | 0.6128  | 0.3565 | -0.0385 | 0.9449 | -0.1850 | 0.7042 |
| OLIGO_10513 | BS29000129203  | TPT1      | 0.0221  | 0.9643 | -0.8072 | 0.0808 | -1.5294 | 0.0509 | -0.4856 | 0.5006 |
| OLIGO_05182 | BS29000130603  | bcnt      | 0.0859  | 0.8102 | 0.0900  | 0.7874 | -0.6149 | 0.0295 | -0.3737 | 0.1288 |
| OLIGO_05183 | BS29000131603  | MGC128732 | -0.1327 | 0.7315 | 0.5632  | 0.1201 | -0.8680 | 0.0051 | -0.6564 | 0.0167 |
| OLIGO_11659 | BS29000192703  | MATR3     | -0.2567 | 0.6345 | -0.3111 | 0.5379 | -1.7410 | 0.0000 | -1.1855 | 0.0015 |
| OLIGO_01643 | BS320039000B12 | V1ra2     | -0.1013 | 0.7239 | 0.5754  | 0.0318 | -0.9289 | 0.0001 | -0.7368 | 0.0002 |
