# Supplementary material
Source: PubMed Central journal article supplement (PMC3053413)
Supplement: NIHMS254788-supplement-4.pdf [file NIHMS254788-supplement-4.pdf]

**Supplemental Materials Table 4.** Comparison of gene expression between embryonic and extra-embryonic AI

samples at 25 d (EvsX\_AI\_25d), and between embryonic and extra-embryonic NT samples at 25 d (EvsX\_NT\_25d)

from the second set of meta-analyses.

| Oligo ID    | cDNA     | Symbol    | EvsX_NT_25d |         | EvsX_NT_25d |         |
|-------------|----------|-----------|-------------|---------|-------------|---------|
|             |          |           | Estimate    | P-value | Estimate    | P-value |
| OLIGO_11398 | AW461330 | DHRS9     | -1.5025     | 0.1315  | -0.4673     | 0.6241  |
| OLIGO_08223 | AW461331 | PHLPP     | 0.1208      | 0.7602  | 0.0128      | 0.9732  |
| OLIGO_10744 | AW461332 | PCBP2     | 1.3904      | 0.0349  | 0.5012      | 0.4268  |
| OLIGO_03617 | AW461333 | ADAM28    | -1.0219     | 0.1444  | -0.2878     | 0.6482  |
| OLIGO_06609 | AW461337 | MARVELD2  | 0.2412      | 0.3945  | 0.2584      | 0.3372  |
| OLIGO_07473 | AW461341 | MTCP1     | 0.2312      | 0.4402  | -0.0922     | 0.7472  |
| OLIGO_07882 | AW461342 | INTS12    | -0.2822     | 0.5696  | -0.0065     | 0.9891  |
| OLIGO_11379 | AW461346 | GRAMD1B   | 0.3969      | 0.394   | -0.0794     | 0.8596  |
| OLIGO_05891 | AW461349 | ARPC5L    | 1.3088      | 0.0004  | 0.8476      | 0.0178  |
| OLIGO_11109 | AW461353 | PPP1R14B  | -0.3687     | 0.4567  | -0.2287     | 0.6317  |
| OLIGO_06132 | AW461355 | THRAP6    | 0.4335      | 0.1942  | -0.0874     | 0.7867  |
| OLIGO_02043 | AW461360 | UBE4B     | -0.4438     | 0.2973  | -0.2965     | 0.4675  |
| OLIGO_07544 | AW461361 | EML2      | 0.7446      | 0.0038  | 0.3769      | 0.125   |
| OLIGO_08329 | AW461364 | QKI       | 0.3135      | 0.419   | 0.48        | 0.1972  |
| OLIGO_07591 | AW461365 | LOC408002 | 0.0461      | 0.8638  | -0.2653     | 0.3025  |
| OLIGO_06793 | AW461367 | DKK4      | 0.1387      | 0.7823  | -0.106      | 0.8289  |
| OLIGO_07236 | AW461369 | SAR1A     | -0.0936     | 0.7524  | -0.2288     | 0.4216  |
| OLIGO_07611 | AW461371 | WBSCR22   | -0.1129     | 0.8289  | 0.0981      | 0.8447  |
| OLIGO_08347 | AW461373 | GNL3      | -1.1364     | 0.0657  | -0.5654     | 0.3412  |
| OLIGO_06850 | AW461378 | CUGBP1    | -0.0032     | 0.9892  | -0.0557     | 0.8076  |
| OLIGO_07282 | AW461380 | TA-NFKBH  | -0.3111     | 0.4792  | -0.1369     | 0.7452  |
| OLIGO_11355 | AW461385 | NOP17     | 0.1037      | 0.8026  | 0.3655      | 0.3581  |
| OLIGO_07115 | AW461388 | WEE1      | 0.2825      | 0.4161  | 0.3763      | 0.2547  |
| OLIGO_05951 | AW461392 | AMT       | -0.2121     | 0.588   | -0.2818     | 0.4529  |
| OLIGO_07116 | AW461395 | TSPAN1    | -1.4291     | 0.02    | -0.8966     | 0.1181  |
| OLIGO_07751 | AW461406 | FAM112B   | 0.1307      | 0.8318  | 0.0374      | 0.9506  |
| OLIGO_11214 | AW461407 | C1orf26   | -1.1104     | 0.0635  | -0.3686     | 0.5179  |
| OLIGO_08404 | AW461409 | PPARBP    | -0.4158     | 0.4079  | -0.0798     | 0.8683  |
| OLIGO_07670 | AW461415 | SEN2      | 1.1598      | 0.0127  | 0.1331      | 0.7692  |
| OLIGO_06305 | AW461416 | LOC653199 | -0.6091     | 0.1099  | -0.337      | 0.3558  |
| OLIGO_06370 | AW461427 | CYP17A1   | -0.5323     | 0.2209  | -0.3973     | 0.3404  |
| OLIGO_08149 | AW461431 | LOC653610 | -0.3647     | 0.4769  | -0.5282     | 0.2827  |
| OLIGO_10154 | AW461432 | TGM3      | -0.7236     | 0.2158  | 0.2089      | 0.6774  |
| OLIGO_06001 | AW461433 | UBQLN1    | 0.3256      | 0.3478  | 0.5724      | 0.0887  |
| OLIGO_06552 | AW461435 | Slc12a9   | -0.5028     | 0.1961  | -0.4971     | 0.1825  |
| OLIGO_08461 | AW461437 | SERTAD1   | 0.1376      | 0.7151  | 0.2134      | 0.555   |
| OLIGO_06560 | AW461442 | BANF1     | 0.5802      | 0.0462  | 0.4205      | 0.1302  |
| OLIGO_06174 | AW461448 | ELOVL7    | 1.1244      | 0.0354  | 0.4785      | 0.3491  |
| OLIGO_10272 | AW461452 | MSX1      | -0.5633     | 0.0379  | -0.5438     | 0.036   |
| OLIGO_05893 | AW461453 | POLR3A    | 0.3171      | 0.374   | -0.0235     | 0.9451  |
| OLIGO_05997 | AW461455 | C9orf156  | -0.2265     | 0.4922  | -0.0776     | 0.8062  |
| OLIGO_06100 | AW461456 | LOC538544 | 0.0545      | 0.8497  | -0.2149     | 0.4361  |
| OLIGO_08686 | AW461457 | CXorf56   | -0.3875     | 0.1749  | -0.3074     | 0.2606  |
| OLIGO_06108 | AW461461 | PLS1      | 0.2187      | 0.6689  | 0.5955      | 0.2195  |
| OLIGO_00652 | AW461462 | WDR5      | -0.0655     | 0.8745  | 0.6785      | 0.0884  |
| OLIGO_06114 | AW461469 | SERPING1  | -0.1329     | 0.708   | -0.039      | 0.9091  |

|             |          |           |         |        |         |        |
|-------------|----------|-----------|---------|--------|---------|--------|
| OLIGO_03623 | AW461471 | JDP2      | -0.0581 | 0.8666 | -0.2904 | 0.3813 |
| OLIGO_10235 | AW461476 | TARSL1    | 0.0948  | 0.7763 | -0.0547 | 0.8654 |
| OLIGO_10285 | AW461477 | IMPA2     | 1.7583  | 0.0001 | 1.1589  | 0.0069 |
| OLIGO_05945 | AW461479 | RNF111    | 0.1842  | 0.4915 | 0.1609  | 0.5315 |
| OLIGO_03624 | AW461481 | FLJ20273  | 0.6031  | 0.1566 | 0.2883  | 0.4778 |
| OLIGO_07252 | AW461482 | LRP10     | 0.0162  | 0.9397 | 0.1063  | 0.6061 |
| OLIGO_10968 | AW461494 | PGEA1     | -0.3509 | 0.5002 | -0.5723 | 0.2517 |
| OLIGO_06141 | AW461498 | PLA2G7    | 0.0094  | 0.9785 | -0.9169 | 0.0064 |
| OLIGO_06437 | AW461501 | TNFAIP6   | -0.669  | 0.1622 | -0.7032 | 0.1256 |
| OLIGO_11507 | AW461502 | NAGA      | -0.2665 | 0.515  | 0.2516  | 0.5274 |
| OLIGO_03625 | AW461503 | TRAPPC4   | -0.4307 | 0.2617 | -0.4471 | 0.2358 |
| OLIGO_09208 | AW461507 | TOR2A     | -0.3214 | 0.6046 | -0.1727 | 0.7754 |
| OLIGO_06198 | AW461508 | TWISTNB   | -0.2021 | 0.6329 | -0.1178 | 0.7719 |
| OLIGO_11224 | AW461512 | H3F3A     | -0.0117 | 0.9776 | 0.3944  | 0.3249 |
| OLIGO_09269 | AW461513 | MGC137708 | -0.0269 | 0.9111 | 0.058   | 0.801  |
| OLIGO_08334 | AW461514 | ANPEP     | -1.1244 | 0.0214 | -1.1324 | 0.0208 |
| OLIGO_03627 | AW461516 | GPBAR1    | -0.4611 | 0.5063 | -0.4609 | 0.4978 |
| OLIGO_05989 | AW461524 | OAT       | 1.9295  | 0.0038 | 1.2905  | 0.0432 |
| OLIGO_10306 | AW461532 | KIAA0196  | 0.6171  | 0.044  | 0.8091  | 0.006  |
| OLIGO_06168 | AW461536 | ZCCHC9    | 0.5615  | 0.0471 | 0.5049  | 0.0615 |
| OLIGO_06412 | AW461538 | MRPL33    | 0.5793  | 0.2377 | 0.4523  | 0.3362 |
| OLIGO_05931 | AW461544 | ASMTL     | -0.9254 | 0.0122 | -0.2163 | 0.5417 |
| OLIGO_00434 | AW461545 | SSBP2     | 0.4441  | 0.3091 | 0.2904  | 0.488  |
| OLIGO_03628 | AW461549 | ANK3      | -0.4291 | 0.5428 | 0.2101  | 0.7616 |
| OLIGO_06418 | AW461550 | ANXA4     | 1.0648  | 0.0747 | 0.4635  | 0.4177 |
| OLIGO_07953 | AW461551 | Map4k4    | 0.9656  | 0.0175 | -0.1227 | 0.7584 |
| OLIGO_06578 | AW461555 | C3orf28   | -0.3033 | 0.5453 | -0.1002 | 0.8349 |
| OLIGO_06386 | AW461557 | C18orf10  | 0.4993  | 0.2029 | 0.2899  | 0.4382 |
| OLIGO_01464 | AW461558 | CTNNBIP1  | -0.5208 | 0.122  | -0.4029 | 0.2101 |
| OLIGO_06424 | AW461559 | PLOD2     | -1.2081 | 0.0423 | -0.2031 | 0.721  |
| OLIGO_09737 | AW461561 | COMMD2    | -0.0846 | 0.7953 | -0.097  | 0.7586 |
| OLIGO_06615 | AW461564 | DAD1      | 0.1574  | 0.6781 | 0.7383  | 0.0941 |
| OLIGO_06002 | AW461566 | NET1      | -0.7849 | 0.0894 | -0.4164 | 0.3467 |
| OLIGO_00499 | AW461571 | PPAP2B    | -0.7482 | 0.0462 | -0.1616 | 0.652  |
| OLIGO_11543 | AW461572 | CEBPB     | 0.1679  | 0.716  | 0.4043  | 0.3635 |
| OLIGO_06017 | AW461578 | PDZK1     | -1.1874 | 0.0237 | -0.7734 | 0.1168 |
| OLIGO_08794 | AW461580 | LOC509011 | 0.7687  | 0.068  | 0.4729  | 0.2411 |
| OLIGO_06390 | AW461581 | AP1G2     | 0.1205  | 0.6242 | -0.016  | 0.9455 |
| OLIGO_06248 | AW461583 | TMED10    | 0.2596  | 0.6199 | -0.2791 | 0.5781 |
| OLIGO_09454 | AW461584 | DYNLL1    | 0.6253  | 0.0986 | 0.353   | 0.3303 |
| OLIGO_09908 | AW461585 | EHMT2     | -0.2743 | 0.4824 | -0.1208 | 0.7469 |
| OLIGO_11696 | AW461586 | TST       | 0.5616  | 0.0287 | 0.3515  | 0.1482 |
| OLIGO_10366 | AW461589 | NUTF2     | 2.1208  | 0.1696 | -1.128  | 0.4758 |
| OLIGO_06120 | AW461591 | HSF1      | -0.0162 | 0.9572 | -0.0994 | 0.7314 |
| OLIGO_09960 | AW461596 | FLJ13611  | -0.3001 | 0.6855 | 0.0683  | 0.9234 |
| OLIGO_05957 | AW461599 | USP21     | -0.8147 | 0.0313 | -0.4741 | 0.1881 |
| OLIGO_06133 | AW461601 | NDUFA8    | 0.7491  | 0.0125 | 0.4501  | 0.1179 |
| OLIGO_02455 | AW461602 | G6PD      | 0.3672  | 0.3007 | 0.4039  | 0.2353 |
| OLIGO_06404 | AW461605 | ALKBH3    | 0.0155  | 0.9685 | 0.2545  | 0.5018 |
| OLIGO_10021 | AW461607 | PXMP3     | 0.1567  | 0.7251 | 0.2139  | 0.6167 |
| OLIGO_10248 | AW461608 | CCBL1     | 0.9439  | 0.139  | 0.0983  | 0.8722 |
| OLIGO_10868 | AW461611 | MYL6      | 0.951   | 0.0016 | 0.6416  | 0.0255 |
| OLIGO_10254 | AW461613 | EAF1      | 0.2789  | 0.6191 | -0.0023 | 0.9966 |
| OLIGO_03630 | AW461617 | AQP11     | -0.2932 | 0.677  | -0.0162 | 0.9809 |
| OLIGO_09620 | AW461620 | HSD11B1   | 0.5055  | 0.1533 | 0.1696  | 0.6158 |

|             |          |           |         |        |         |        |
|-------------|----------|-----------|---------|--------|---------|--------|
| OLIGO_10141 | AW461623 | UBA2      | 0.688   | 0.1287 | 0.3308  | 0.4164 |
| OLIGO_06146 | AW461625 | B3GAT3    | 0.4023  | 0.1255 | 0.1262  | 0.613  |
| OLIGO_06217 | AW461627 | USP14     | 0.4501  | 0.2124 | 0.6086  | 0.1129 |
| OLIGO_09096 | AW461632 | EMX2      | 0.2905  | 0.5089 | 0.2189  | 0.6037 |
| OLIGO_10994 | AW461634 | EFHA1     | -0.1997 | 0.4656 | -0.0992 | 0.7035 |
| OLIGO_06067 | AW461644 | SERINC3   | 0.7937  | 0.0273 | 0.5931  | 0.0848 |
| OLIGO_03631 | AW461651 | EXOC2     | -0.0065 | 0.9805 | 0.1823  | 0.4764 |
| OLIGO_05976 | AW461652 | SMPDL3B   | -1.2605 | 0.0692 | -0.6793 | 0.3064 |
| OLIGO_08253 | AW461656 | SMTNL2    | -0.3602 | 0.531  | -0.3245 | 0.5609 |
| OLIGO_03632 | AW461661 | OBSL1     | -0.6773 | 0.0752 | -0.3545 | 0.3331 |
| OLIGO_06266 | AW461664 | WBSCR27   | -0.0576 | 0.875  | 0.1664  | 0.6356 |
| OLIGO_06982 | AW461667 | RBX1      | 0.3152  | 0.1605 | -0.0126 | 0.9532 |
| OLIGO_10299 | AW461668 | DOCK8     | 0.288   | 0.5503 | 0.5498  | 0.2438 |
| OLIGO_11089 | AW461672 | FASTK     | 0.2676  | 0.2729 | 0.319   | 0.1752 |
| OLIGO_06520 | AW461676 | KCTD11    | 0.0092  | 0.9859 | -0.234  | 0.6499 |
| OLIGO_06456 | AW461682 | SLC4A11   | 0.6335  | 0.047  | 0.2113  | 0.4865 |
| OLIGO_03633 | AW461686 | TSG101    | 0.1899  | 0.6564 | 0.3319  | 0.4154 |
| OLIGO_06320 | AW461687 | CDC34     | -0.0669 | 0.7411 | 0.0625  | 0.7471 |
| OLIGO_06540 | AW461688 | C7orf11   | -0.059  | 0.8444 | -0.0289 | 0.92   |
| OLIGO_09493 | AW461689 | ZNF436    | 0.2564  | 0.5679 | -0.1372 | 0.7554 |
| OLIGO_06463 | AW461692 | SNRPD1    | 0.2797  | 0.5535 | 0.1192  | 0.7932 |
| OLIGO_06635 | AW461693 | LOC618151 | 0.0562  | 0.9284 | 0.193   | 0.7479 |
| OLIGO_06502 | AW461694 | IRF6      | -1.1139 | 0.3062 | -0.1483 | 0.8862 |
| OLIGO_10583 | AW461695 | SNORA24   | -0.5739 | 0.3794 | -0.3518 | 0.5759 |
| OLIGO_03634 | AW461699 | ABCC10    | -0.404  | 0.2472 | -0.1526 | 0.6483 |
| OLIGO_06371 | AW461704 | ZC3HAV1   | 0.5747  | 0.143  | 0.1067  | 0.7765 |
| OLIGO_08344 | AW461706 | SAP30     | 0.0942  | 0.8583 | 0.0397  | 0.9378 |
| OLIGO_08345 | AW461709 | FLJ20647  | 0.9773  | 0.0227 | 0.6285  | 0.1276 |
| OLIGO_06349 | AW461715 | PEBP1     | 1.0365  | 0.0286 | 0.7883  | 0.0816 |
| OLIGO_03635 | AW461717 | CKMT1B    | 0.0811  | 0.8753 | -0.0482 | 0.924  |
| OLIGO_10749 | AW461719 | LSMD1     | -0.5738 | 0.2829 | 0.0607  | 0.8982 |
| OLIGO_06306 | AW461722 | ALPK3     | -1.3125 | 0.066  | -1.0282 | 0.1311 |
| OLIGO_10676 | AW461724 | GM2A      | 0.4664  | 0.3878 | -0.4192 | 0.4255 |
| OLIGO_11260 | AW461725 | ABHD4     | -0.023  | 0.9493 | -0.2218 | 0.5206 |
| OLIGO_06604 | AW461727 | HOOK1     | -0.7394 | 0.1268 | -0.7572 | 0.1029 |
| OLIGO_08349 | AW461734 | Usp12     | 0.0537  | 0.8705 | 0.262   | 0.4243 |
| OLIGO_06273 | AW461737 | IER5      | 0.4398  | 0.1082 | 0.2101  | 0.4218 |
| OLIGO_06297 | AW461753 | PGM2L1    | 0.1995  | 0.5653 | 0.2173  | 0.5135 |
| OLIGO_08352 | AW461754 | LOC505940 | 0.0322  | 0.9406 | -0.2048 | 0.6205 |
| OLIGO_03640 | AW461756 | ENTPD8    | -0.2125 | 0.6572 | -0.1453 | 0.7554 |
| OLIGO_08655 | AW461759 | SIGIRR    | -0.3891 | 0.3823 | -0.0845 | 0.8419 |
| OLIGO_06530 | AW461766 | LLGL2     | 0.0036  | 0.9955 | 0.1041  | 0.8676 |
| OLIGO_11358 | AW461769 | CBR1      | -0.4032 | 0.2959 | -0.758  | 0.0428 |
| OLIGO_06653 | AW461781 | MAN2A2    | -0.0765 | 0.7835 | -0.1425 | 0.5934 |
| OLIGO_10437 | AW461783 | PDPN      | 2.2227  | 0.0001 | 1.463   | 0.0082 |
| OLIGO_07199 | AW461790 | UBE2R2    | 0.7086  | 0.0396 | 0.3135  | 0.3415 |
| OLIGO_06598 | AW461795 | MCEE      | -0.4259 | 0.1643 | 0.0453  | 0.8741 |
| OLIGO_10086 | AW461799 | STK25     | -0.5176 | 0.23   | -0.1875 | 0.6498 |
| OLIGO_06379 | AW461802 | P8        | -0.1649 | 0.7454 | 0.12    | 0.8053 |
| OLIGO_03642 | AW461803 | NCOA6     | 0.7598  | 0.0085 | 0.4595  | 0.096  |
| OLIGO_06621 | AW461804 | AI427138  | -2.4039 | 0.0287 | -1.7424 | 0.0772 |
| OLIGO_03643 | AW461808 | TP53RK    | 0.0187  | 0.9403 | -0.0551 | 0.8175 |
| OLIGO_10466 | AW461813 | RPL31     | -0.4226 | 0.2872 | -0.6734 | 0.083  |
| OLIGO_06553 | AW461818 | CCL14     | -0.4877 | 0.446  | -0.0421 | 0.9459 |
| OLIGO_08228 | AW461823 | EMG1      | 0.5603  | 0.2201 | 0.3672  | 0.4024 |

|             |          |             |         |        |         |        |
|-------------|----------|-------------|---------|--------|---------|--------|
| OLIGO_07826 | AW461824 | VPS29       | 0.5302  | 0.1221 | 0.3509  | 0.2836 |
| OLIGO_03645 | AW461828 | ANKH        | 0.3763  | 0.3384 | 0.167   | 0.6634 |
| OLIGO_08355 | AW461830 | GPX1        | 0.6071  | 0.2669 | 0.2537  | 0.6282 |
| OLIGO_10579 | AW461832 | RPL18       | 0.6398  | 0.1707 | -0.1805 | 0.6865 |
| OLIGO_07040 | AW461836 | RNF5        | 0.4525  | 0.1675 | 0.0921  | 0.7694 |
| OLIGO_06488 | AW461838 | WNT6        | -0.19   | 0.668  | -0.1227 | 0.7707 |
| OLIGO_08356 | AW461844 | CC2D1B      | 0.4394  | 0.4964 | 0.2264  | 0.7146 |
| OLIGO_03646 | AW461846 | TNKS1BP1    | -0.8037 | 0.0749 | -0.2817 | 0.5143 |
| OLIGO_03647 | AW461848 | RP1-112K5.2 | -0.0134 | 0.9672 | -0.1955 | 0.5286 |
| OLIGO_06534 | AW461852 | SLC27A2     | -1.4751 | 0.2166 | -1.2336 | 0.2799 |
| OLIGO_02768 | AW461859 | UBE2R2      | 0.6532  | 0.0895 | 0.3618  | 0.3261 |
| OLIGO_08079 | AW461861 | ABHD11      | 0.3599  | 0.5929 | 0.1521  | 0.8176 |
| OLIGO_03649 | AW461867 | TMEM86A     | 0.4649  | 0.4058 | -0.0831 | 0.8792 |
| OLIGO_06723 | AW461872 | MSR1        | -1.0941 | 0.0568 | -0.5906 | 0.2902 |
| OLIGO_06910 | AW461877 | CACYBP      | 0.3506  | 0.3648 | 0.1971  | 0.595  |
| OLIGO_03650 | AW461878 | LIFR        | -2.2105 | 0.0038 | -1.6377 | 0.025  |
| OLIGO_03651 | AW461879 | SPTBN2      | 0.1775  | 0.7002 | -0.4425 | 0.317  |
| OLIGO_06732 | AW461882 | ATF7IP      | -0.1581 | 0.5931 | -0.219  | 0.439  |
| OLIGO_11008 | AW461884 | ANKRD43     | 1.3039  | 0.0004 | 0.6436  | 0.0654 |
| OLIGO_03653 | AW461893 | HAND2       | -1.6598 | 0.0038 | -1.637  | 0.003  |
| OLIGO_08362 | AW461896 | TAOK3       | -0.0242 | 0.9472 | 0.1763  | 0.6138 |
| OLIGO_03654 | AW461898 | PPM1J       | -0.0759 | 0.9224 | -0.5468 | 0.4792 |
| OLIGO_06697 | AW461900 | THYN1       | -0.3247 | 0.3491 | 0.1469  | 0.6569 |
| OLIGO_03655 | AW461905 | CFD         | -0.1729 | 0.7812 | -0.046  | 0.94   |
| OLIGO_00954 | AW461910 | SNX1        | 0.2132  | 0.476  | 0.0195  | 0.9454 |
| OLIGO_11362 | AW461911 | SBF1        | -0.0329 | 0.9484 | -0.0302 | 0.951  |
| OLIGO_10066 | AW461914 | SDC1        | 0.8574  | 0.026  | -0.1013 | 0.7828 |
| OLIGO_03656 | AW461921 | ECT2        | -0.5652 | 0.275  | -0.799  | 0.1341 |
| OLIGO_00726 | AW461927 | SMARCE1     | -0.347  | 0.4401 | 0.1762  | 0.683  |
| OLIGO_11690 | AW461928 | MYO6        | -0.0167 | 0.9599 | -0.0924 | 0.7723 |
| OLIGO_10029 | AW461930 | RNF8        | 0.103   | 0.7745 | 0.371   | 0.2821 |
| OLIGO_03657 | AW461931 | IQGAP3      | 0.3082  | 0.4607 | 0.1433  | 0.7152 |
| OLIGO_06856 | AW461932 | PHLDA1      | 0.4912  | 0.1991 | 0.5396  | 0.1394 |
| OLIGO_06742 | AW461934 | TPARL       | 0.227   | 0.3952 | 0.481   | 0.0598 |
| OLIGO_03659 | AW461939 | ESPN        | -1.5073 | 0.0099 | -0.6741 | 0.2277 |
| OLIGO_11694 | AW461943 | POLR1A      | 0.0539  | 0.8296 | 0.1519  | 0.5272 |
| OLIGO_06819 | AW461946 | FLJ20487    | -0.5607 | 0.1077 | 0.0865  | 0.7949 |
| OLIGO_11228 | AW461948 | LTBP4       | -0.2615 | 0.4793 | -0.0333 | 0.9251 |
| OLIGO_06885 | AW461949 | SF3B3       | 0.137   | 0.6627 | 0.1212  | 0.693  |
| OLIGO_11681 | AW461965 | LOC507264   | 0.2082  | 0.5991 | 0.3807  | 0.3164 |
| OLIGO_08469 | AW461969 | DPH2        | -0.4925 | 0.0738 | -0.7257 | 0.0059 |
| OLIGO_03660 | AW461976 | NDUFV1      | -0.2371 | 0.5567 | -0.0895 | 0.8168 |
| OLIGO_01751 | AW461980 | LOC649124   | 0.6914  | 0.015  | 0.6919  | 0.0108 |
| OLIGO_06775 | AW461984 | PAK6        | 0.4522  | 0.3296 | 0.3269  | 0.4622 |
| OLIGO_08357 | AW461987 | PRL         | -2.554  | 0.0182 | -1.1014 | 0.287  |
| OLIGO_08375 | AW461989 | DNAJA4      | 0.42    | 0.5169 | 0.4015  | 0.5181 |
| OLIGO_07480 | AW461991 | C1orf144    | -0.041  | 0.9051 | -0.5647 | 0.0875 |
| OLIGO_11364 | AW461992 | TACSTD1     | -0.5731 | 0.2847 | -0.0856 | 0.8676 |
| OLIGO_08376 | AW461995 | SH2D3C      | -0.652  | 0.2464 | -0.3265 | 0.5446 |
| OLIGO_10651 | AW461997 | ATP5G2      | 0.9367  | 0.223  | 1.1835  | 0.1085 |
| OLIGO_08372 | AW461998 | CSRP1       | -0.2339 | 0.5856 | -0.0449 | 0.9131 |
| OLIGO_06531 | AW461999 | HSPC023     | -0.799  | 0.1209 | -0.1345 | 0.7851 |
| OLIGO_05719 | AW462010 | ANKRA2      | -0.1495 | 0.7113 | -0.1697 | 0.6613 |
| OLIGO_03662 | AW462014 | PREP        | -0.3653 | 0.319  | -0.5604 | 0.1112 |
| OLIGO_03663 | AW462016 | ZNF410      | -0.2301 | 0.554  | -0.4426 | 0.2702 |

|             |          |           |         |        |         |        |
|-------------|----------|-----------|---------|--------|---------|--------|
| OLIGO_08381 | AW462018 | S100A6    | -0.0213 | 0.9691 | -0.0212 | 0.9689 |
| OLIGO_06670 | AW462019 | WDR8      | 0.0098  | 0.9759 | 0.1552  | 0.6294 |
| OLIGO_08382 | AW462021 | LOC512313 | 0.1651  | 0.698  | 0.1025  | 0.8014 |
| OLIGO_08383 | AW462027 | SLC39A11  | 0.4181  | 0.1031 | 0.1369  | 0.5754 |
| OLIGO_11113 | AW462031 | KIAA0804  | -1.179  | 0.0705 | -0.6578 | 0.292  |
| OLIGO_08385 | AW462032 | LOC508291 | 0.203   | 0.7452 | 0.49    | 0.4302 |
| OLIGO_08386 | AW462034 | ACP2      | -0.1379 | 0.5076 | -0.1012 | 0.6102 |
| OLIGO_03664 | AW462037 | NDRG3     | -0.2371 | 0.5645 | -0.4603 | 0.2685 |
| OLIGO_08540 | AW462038 | PLAU      | -0.3449 | 0.3221 | -0.497  | 0.1366 |
| OLIGO_06646 | AW462040 | CALR      | -0.9256 | 0.0589 | -0.0405 | 0.9312 |
| OLIGO_03665 | AW462041 | C16orf24  | -0.0526 | 0.8593 | -0.3659 | 0.196  |
| OLIGO_10470 | AW462043 | MRPL52    | 0.0632  | 0.8171 | -0.1642 | 0.5304 |
| OLIGO_06526 | AW462048 | GORASP2   | -0.1961 | 0.4828 | 0.1789  | 0.5096 |
| OLIGO_10505 | AW462057 | ARF4      | -0.0479 | 0.8939 | -0.1417 | 0.6867 |
| OLIGO_07442 | AW462060 | MED31     | 0.2379  | 0.3087 | 0.111   | 0.6182 |
| OLIGO_10768 | AW462064 | LOC493778 | 0.4306  | 0.355  | 0.2882  | 0.5176 |
| OLIGO_09977 | AW462065 | LOC516545 | -0.3369 | 0.3902 | 0.1225  | 0.7442 |
| OLIGO_08587 | AW462067 | COMMMD9   | 0.2786  | 0.5427 | -0.1035 | 0.8136 |
| OLIGO_03666 | AW462068 | KIAA1026  | -0.0473 | 0.9413 | 0.0119  | 0.985  |
| OLIGO_07482 | AW462072 | RNF130    | 1.0932  | 0.0016 | 0.0571  | 0.8632 |
| OLIGO_06902 | AW462073 | PSMC1     | 0.3129  | 0.4042 | 0.4467  | 0.2145 |
| OLIGO_08037 | AW462074 | RUFY3     | -0.4254 | 0.3051 | -0.4817 | 0.2495 |
| OLIGO_01613 | AW462081 | EMP1      | -0.5019 | 0.3167 | 0.2455  | 0.6009 |
| OLIGO_11368 | AW462082 | KIFC1     | 0.4773  | 0.3419 | 0.5552  | 0.2491 |
| OLIGO_03667 | AW462087 | EPB41L5   | 0.0549  | 0.9267 | -0.064  | 0.9131 |
| OLIGO_07652 | AW462089 | BLVRB     | -0.687  | 0.0617 | -0.317  | 0.3679 |
| OLIGO_03668 | AW462090 | DDX54     | -0.1515 | 0.6273 | 0.0233  | 0.9376 |
| OLIGO_02284 | AW462091 | BLMH      | -0.5422 | 0.5097 | 0.1125  | 0.8895 |
| OLIGO_06930 | AW462092 | PTGS2     | -1.766  | 0.0823 | -0.5428 | 0.5766 |
| OLIGO_07063 | AW462094 | FUT6      | -0.9216 | 0.2877 | -0.1742 | 0.8339 |
| OLIGO_08394 | AW462097 | GAPVD1    | -0.622  | 0.2779 | -0.033  | 0.9512 |
| OLIGO_03669 | AW462100 | M-RIP     | -0.1843 | 0.6339 | -0.1548 | 0.6765 |
| OLIGO_03670 | AW462101 | NIBP      | -0.1523 | 0.6219 | 0.0556  | 0.8517 |
| OLIGO_03672 | AW462106 | Pfkfb2    | 0.7127  | 0.1085 | 0.4376  | 0.2754 |
| OLIGO_10695 | AW462111 | YAP1      | -0.9283 | 0.0146 | -0.4394 | 0.2191 |
| OLIGO_07918 | AW462117 | C15orf24  | 0.6849  | 0.0603 | 0.524   | 0.1335 |
| OLIGO_10026 | AW462121 | BHLHB2    | 1.7779  | 0.0019 | 1.2321  | 0.0242 |
| OLIGO_07183 | AW462122 | CCM2      | 0.4866  | 0.4786 | 0.2649  | 0.6873 |
| OLIGO_11363 | AW462126 | LAD1      | -0.5232 | 0.4413 | -0.2236 | 0.7923 |
| OLIGO_08396 | AW462131 | TRPC4AP   | 0.4167  | 0.1612 | -0.0041 | 0.9886 |
| OLIGO_03674 | AW462132 | GJB3      | -0.1048 | 0.7851 | 0.0617  | 0.8664 |
| OLIGO_07207 | AW462134 | CXCL14    | 1.0328  | 0.1131 | 0.2922  | 0.6392 |
| OLIGO_08398 | AW462136 | LEPRE1    | -0.4391 | 0.0231 | -0.093  | 0.6142 |
| OLIGO_08379 | AW462147 | CRSP7     | 0.069   | 0.7807 | 0.0252  | 0.9165 |
| OLIGO_03677 | AW462148 | FAM100A   | 0.7378  | 0.157  | 0.2373  | 0.6346 |
| OLIGO_03678 | AW462149 | NAPE-PLD  | 0.0271  | 0.953  | -0.0211 | 0.9619 |
| OLIGO_01256 | AW462157 | STARD5    | 0.4418  | 0.2177 | -0.5077 | 0.1398 |
| OLIGO_03679 | AW462158 | DDX28     | 0.1107  | 0.8519 | 0.1176  | 0.8408 |
| OLIGO_06944 | AW462161 | PITPNB    | 0.3103  | 0.226  | 0.2428  | 0.3212 |
| OLIGO_07010 | AW462162 | FKSG24    | 0.3559  | 0.5551 | 0.0816  | 0.8878 |
| OLIGO_08262 | AW462168 | C20orf24  | 0.2734  | 0.4117 | 0.4339  | 0.1738 |
| OLIGO_07176 | AW462170 | RHEB      | 0.194   | 0.6029 | -0.1148 | 0.748  |
| OLIGO_07019 | AW462172 | ARSB      | -0.129  | 0.8067 | 0.3305  | 0.5133 |
| OLIGO_03681 | AW462178 | RAB6IP2   | 0.4003  | 0.4649 | 0.5081  | 0.3334 |
| OLIGO_03682 | AW462180 | RRAD      | -0.5445 | 0.2528 | -0.209  | 0.6469 |

|             |          |           |         |        |         |        |
|-------------|----------|-----------|---------|--------|---------|--------|
| OLIGO_08576 | AW462182 | PLAT      | 0.202   | 0.6305 | 0.1356  | 0.7363 |
| OLIGO_03683 | AW462186 | MOSPD2    | -0.308  | 0.4064 | -0.5698 | 0.1091 |
| OLIGO_08400 | AW462187 | FRAP1     | -0.2387 | 0.6057 | -0.2389 | 0.5901 |
| OLIGO_03685 | AW462195 | ITGBL1    | -0.1909 | 0.6062 | -0.2366 | 0.5047 |
| OLIGO_03686 | AW462196 | CPSF2     | 0.0244  | 0.9352 | 0.2131  | 0.4563 |
| OLIGO_11261 | AW462197 | RCN3      | 0.1881  | 0.7143 | -0.8187 | 0.0948 |
| OLIGO_03687 | AW462199 | CDC42SE2  | -0.0952 | 0.8282 | 0.1985  | 0.6372 |
| OLIGO_06189 | AW462203 | CRTC3     | 0.2587  | 0.3779 | 0.216   | 0.4414 |
| OLIGO_06973 | AW462205 | KIAA0319L | -0.2407 | 0.3677 | -0.3539 | 0.1676 |
| OLIGO_07044 | AW462206 | ASRGL1    | 0.2785  | 0.5336 | 0.687   | 0.1078 |
| OLIGO_06911 | AW462209 | ARHGEF1   | 0.6097  | 0.3562 | 0.0653  | 0.9178 |
| OLIGO_07334 | AW462220 | RANBP1    | -0.1667 | 0.6679 | -0.0912 | 0.8066 |
| OLIGO_03688 | AW462221 | LOC535768 | -1.4945 | 0.1223 | -0.7194 | 0.425  |
| OLIGO_03689 | AW462223 | TYRO3     | -1.4142 | 0.0038 | -0.7088 | 0.1293 |
| OLIGO_08244 | AW462229 | KBTBD11   | 1.0707  | 0.0611 | 0.7891  | 0.1491 |
| OLIGO_11349 | AW462231 | HEXA      | -0.4926 | 0.1644 | -0.1256 | 0.7113 |
| OLIGO_06919 | AW462239 | DOPEY2    | -0.3292 | 0.4486 | -0.1683 | 0.6854 |
| OLIGO_06984 | AW462245 | ZNF143    | -0.7104 | 0.0992 | -0.3748 | 0.3618 |
| OLIGO_08336 | AW462247 | PSMA4     | 0.4261  | 0.3045 | 0.1374  | 0.7336 |
| OLIGO_08401 | AW462249 | BCAM      | -0.5183 | 0.09   | 0.2506  | 0.3921 |
| OLIGO_03693 | AW462250 | NAB1      | 0.2943  | 0.548  | 0.3677  | 0.4338 |
| OLIGO_06811 | AW462257 | CAPZA2    | 0.5174  | 0.1195 | -0.1912 | 0.548  |
| OLIGO_03694 | AW462258 | DNAJC8    | 0.3935  | 0.2378 | 0.2002  | 0.5283 |
| OLIGO_07806 | AW462259 | MRPL54    | -0.1505 | 0.7835 | 0.1001  | 0.8489 |
| OLIGO_08169 | AW462262 | GRHPR     | 0.2807  | 0.3761 | 0.1261  | 0.6699 |
| OLIGO_10569 | AW462277 | LOC505788 | 0.8498  | 0.0818 | 0.6315  | 0.1755 |
| OLIGO_10548 | AW462278 | JUND      | 0.4049  | 0.257  | 0.2113  | 0.5372 |
| OLIGO_03695 | AW462280 | KCNJ8     | -0.5078 | 0.5299 | 0.1274  | 0.867  |
| OLIGO_03696 | AW462294 | NUP50     | 0.2179  | 0.7508 | 0.2585  | 0.6944 |
| OLIGO_07851 | AW462297 | ING1      | 0.0792  | 0.8682 | -0.1548 | 0.735  |
| OLIGO_03955 | AW462298 | SF3B4     | 0.3293  | 0.472  | 0.2796  | 0.5304 |
| OLIGO_07766 | AW462306 | TOR1A     | -0.3012 | 0.384  | -0.1539 | 0.6426 |
| OLIGO_07855 | AW462308 | SEC13L1   | 0.276   | 0.4621 | 0.1063  | 0.7691 |
| OLIGO_08574 | AW462310 | IER5L     | -0.2023 | 0.5594 | -0.3899 | 0.2408 |
| OLIGO_08990 | AW462314 | BTF3      | 0.4339  | 0.2809 | 1.1137  | 0.0041 |
| OLIGO_07551 | AW462315 | EPS8L1    | 0.1101  | 0.7553 | -0.0362 | 0.9148 |
| OLIGO_07618 | AW462316 | SHQ1      | -0.6353 | 0.0655 | -0.7571 | 0.0219 |
| OLIGO_06865 | AW462319 | ATP5H     | 0.07    | 0.7629 | -0.0664 | 0.7642 |
| OLIGO_01041 | AW462323 | SIPA1L2   | -0.162  | 0.7005 | -0.0189 | 0.9634 |
| OLIGO_07870 | AW462328 | CASP8AP2  | 0.2342  | 0.4368 | -0.1782 | 0.5372 |
| OLIGO_11166 | AW462333 | GRP1      | -1.0519 | 0.0656 | -1.0694 | 0.0615 |
| OLIGO_07474 | AW462334 | IBRDC3    | 0.6659  | 0.0748 | -0.0218 | 0.9521 |
| OLIGO_00086 | AW462335 | SULT1A1   | 0.8526  | 0.0544 | 0.9162  | 0.0312 |
| OLIGO_07685 | AW462337 | RALY      | 0.8017  | 0.1035 | -0.1869 | 0.6918 |
| OLIGO_07782 | AW462338 | VPS53     | 0.7068  | 0.2628 | 0.0971  | 0.8694 |
| OLIGO_07389 | AW462343 | NDUFS8    | -0.0797 | 0.79   | -0.1484 | 0.6187 |
| OLIGO_07489 | AW462344 | PDXP      | -0.3009 | 0.3657 | -0.0586 | 0.8538 |
| OLIGO_07625 | AW462346 | SAMM50    | 0.2486  | 0.4018 | 0.1426  | 0.6107 |
| OLIGO_07697 | AW462347 | DUS2L     | -0.3713 | 0.3216 | -0.1597 | 0.6565 |
| OLIGO_07792 | AW462348 | MRPL34    | 0.1288  | 0.7195 | 0.2299  | 0.5039 |
| OLIGO_07883 | AW462350 | ARHGAP27  | 1.0217  | 0.0257 | 0.7858  | 0.0728 |
| OLIGO_09495 | AW462353 | LOC506205 | -0.1008 | 0.7441 | -0.2253 | 0.4463 |
| OLIGO_07283 | AW462354 | PACSIN2   | -0.2026 | 0.6639 | -0.0737 | 0.8716 |
| OLIGO_05641 | AW462357 | ALDOC     | 0.4828  | 0.223  | -0.4754 | 0.2098 |
| OLIGO_08409 | AW462359 | PARP4     | -0.7638 | 0.3032 | -0.3427 | 0.6273 |

|             |          |           |         |        |         |        |
|-------------|----------|-----------|---------|--------|---------|--------|
| OLIGO_07963 | AW462362 | PSMD8     | 0.1102  | 0.7101 | 0.1321  | 0.642  |
| OLIGO_08056 | AW462363 | C2orf25   | 0.1934  | 0.5881 | 0.0839  | 0.8053 |
| OLIGO_07229 | AW462364 | DIAPH1    | -0.2868 | 0.4426 | -0.2003 | 0.5747 |
| OLIGO_07707 | AW462368 | FAM18B    | -0.0523 | 0.8772 | 0.4015  | 0.2167 |
| OLIGO_07807 | AW462369 | RARRES1   | -1.8015 | 0.0048 | -0.3418 | 0.5735 |
| OLIGO_07155 | AW462370 | MGC23909  | -0.5286 | 0.2908 | -0.2398 | 0.617  |
| OLIGO_07575 | AW462378 | FAM59A    | -0.0921 | 0.8434 | -0.3332 | 0.456  |
| OLIGO_07639 | AW462379 | Ppt1      | -0.339  | 0.3299 | 0.0481  | 0.8854 |
| OLIGO_07382 | AW462383 | ATP6AP2   | -0.1205 | 0.8088 | 0.3028  | 0.5249 |
| OLIGO_07237 | AW462385 | STX1A     | 0.4613  | 0.3368 | 0.3837  | 0.4061 |
| OLIGO_03698 | AW462390 | NAG8      | -0.235  | 0.4908 | 0.3631  | 0.2661 |
| OLIGO_07811 | AW462392 | CDH23     | 0.6953  | 0.1758 | 0.4073  | 0.4079 |
| OLIGO_07980 | AW462395 | CD163     | 0.51    | 0.6722 | -0.076  | 0.9441 |
| OLIGO_07242 | AW462397 | KIAA1012  | -0.0065 | 0.9797 | 0.3086  | 0.2062 |
| OLIGO_03699 | AW462404 | ATP12A    | -1.7579 | 0.0116 | -0.3954 | 0.5517 |
| OLIGO_11422 | AW462406 | EIF2AK1   | 0.2115  | 0.7043 | 0.0571  | 0.9153 |
| OLIGO_08193 | AW462407 | PSMD13    | 0.2317  | 0.5754 | 0.2212  | 0.577  |
| OLIGO_10207 | AW462408 | SERINC1   | 0.5475  | 0.1011 | 0.636   | 0.047  |
| OLIGO_07306 | AW462410 | FZD5      | -0.5041 | 0.3243 | -0.1612 | 0.7423 |
| OLIGO_08229 | AW462412 | CLK2      | 0.4932  | 0.3347 | 0.1613  | 0.7461 |
| OLIGO_08412 | AW462414 | FAM53C    | 0.732   | 0.0681 | 0.3602  | 0.3484 |
| OLIGO_03700 | AW462417 | EHMT1     | -1.2518 | 0.0028 | -0.8377 | 0.0362 |
| OLIGO_06541 | AW462432 | CTGF      | 0.3754  | 0.3578 | 0.3815  | 0.329  |
| OLIGO_08415 | AW462434 | SLC9A2    | -0.8695 | 0.29   | -0.1609 | 0.8235 |
| OLIGO_07600 | AW462436 | GNG10     | 0.4518  | 0.1432 | 0.3374  | 0.2528 |
| OLIGO_03702 | AW462437 | SAPS2     | -0.1837 | 0.8064 | -0.268  | 0.7162 |
| OLIGO_10761 | AW462442 | ALAD      | -0.7616 | 0.1003 | -0.4945 | 0.2675 |
| OLIGO_06579 | AW462449 | EEF1B2    | 0.2491  | 0.6911 | 0.1696  | 0.7778 |
| OLIGO_07830 | AW462450 | RBPSUH    | -0.684  | 0.1468 | -0.1404 | 0.7263 |
| OLIGO_09980 | AW462453 | HIP1      | -0.696  | 0.2871 | -1.158  | 0.0586 |
| OLIGO_07914 | AW462454 | SACMIL    | 0.1625  | 0.645  | 0.2096  | 0.5356 |
| OLIGO_07668 | AW462459 | EVA1      | -0.0123 | 0.9892 | 0.7597  | 0.406  |
| OLIGO_03703 | AW462460 | MKX       | -0.3537 | 0.3617 | -0.2367 | 0.5243 |
| OLIGO_03953 | AW462461 | ELMO3     | -1.174  | 0.0812 | -0.6143 | 0.3408 |
| OLIGO_07204 | AW462462 | CREBL1    | -0.2682 | 0.4125 | -0.5135 | 0.1398 |
| OLIGO_10163 | AW462464 | DNAH17    | 0.2393  | 0.5116 | -0.1775 | 0.617  |
| OLIGO_07347 | AW462466 | SOD1      | 0.8658  | 0.0457 | 0.4086  | 0.3245 |
| OLIGO_03704 | AW462469 | FLJ43339  | 0.3038  | 0.3115 | 0.3275  | 0.253  |
| OLIGO_10711 | AW462471 | COMT      | -0.2406 | 0.7453 | -0.1752 | 0.8102 |
| OLIGO_10586 | AW462476 | APOA1     | -2.5922 | 0.0001 | -1.4942 | 0.021  |
| OLIGO_03705 | AW462477 | FPGS      | 1.6424  | 0.0092 | 0.9476  | 0.1161 |
| OLIGO_10670 | AW462478 | HTRA1     | 0.175   | 0.6531 | 0.0068  | 0.9853 |
| OLIGO_07773 | AW462480 | SREBF1    | 0.4968  | 0.4587 | -0.0869 | 0.8924 |
| OLIGO_03706 | AW462482 | LYST      | 0.2899  | 0.6467 | -0.0111 | 0.9854 |
| OLIGO_08967 | AW462485 | ORF1-FL49 | 0.9575  | 0.0068 | 0.9779  | 0.0038 |
| OLIGO_11424 | AW462492 | BTBD7     | 0.1928  | 0.6203 | -0.1553 | 0.6772 |
| OLIGO_08042 | AW462493 | CCNL1     | 0.5385  | 0.08   | 0.7174  | 0.0151 |
| OLIGO_08049 | AW462503 | CSDA      | 0.3528  | 0.4655 | 0.4675  | 0.3084 |
| OLIGO_03708 | AW462506 | SNAP23    | -0.3441 | 0.4962 | 0.0336  | 0.9444 |
| OLIGO_07787 | AW462509 | LOC523454 | -0.7999 | 0.0779 | -0.3067 | 0.4784 |
| OLIGO_07130 | AW462510 | SIAH2     | 0.6441  | 0.062  | 0.2806  | 0.3957 |
| OLIGO_07223 | AW462514 | GSPT1     | -0.61   | 0.2009 | -0.1759 | 0.6996 |
| OLIGO_07499 | AW462517 | GAA       | -0.0579 | 0.9381 | 0.3282  | 0.6463 |
| OLIGO_07561 | AW462518 | AU016693  | 0.3564  | 0.1861 | 0.0382  | 0.8821 |
| OLIGO_07633 | AW462519 | CHKB      | -0.0534 | 0.8951 | 0.1709  | 0.6597 |

|             |          |              |         |        |         |        |
|-------------|----------|--------------|---------|--------|---------|--------|
| OLIGO_07799 | AW462521 | ABCG2        | -0.2315 | 0.4887 | -0.5152 | 0.1084 |
| OLIGO_10589 | AW462524 | RPS18        | 0.2733  | 0.6617 | 0.8096  | 0.1767 |
| OLIGO_07289 | AW462527 | PLB1         | 0.1215  | 0.7666 | -0.4634 | 0.238  |
| OLIGO_09205 | AW462529 | INADL        | -0.6718 | 0.1621 | -0.5422 | 0.2391 |
| OLIGO_08422 | AW462537 | SESN1        | -0.2691 | 0.3007 | -0.3178 | 0.2018 |
| OLIGO_08275 | AW462538 | SNRBP2       | 0.0362  | 0.8865 | 0.0743  | 0.759  |
| OLIGO_03709 | AW462539 | MAPK6        | -0.5561 | 0.2229 | -0.2236 | 0.5881 |
| OLIGO_07976 | AW462546 | COPZ2        | -0.9789 | 0.2343 | -0.0904 | 0.9099 |
| OLIGO_07645 | AW462553 | EIF2S1       | 0.9015  | 0.036  | 0.3902  | 0.3429 |
| OLIGO_07714 | AW462554 | RP5-1022P6.2 | 0.0488  | 0.9007 | 0.0091  | 0.9806 |
| OLIGO_10185 | AW462555 | YIPF6        | -0.001  | 0.9982 | -0.0578 | 0.8916 |
| OLIGO_10734 | AW462563 | ECHDC1       | 0.0813  | 0.8017 | 0.2163  | 0.4858 |
| OLIGO_11350 | AW462569 | MLKL         | -1.0997 | 0.0192 | -0.4351 | 0.3372 |
| OLIGO_11594 | AW462573 | ANXA1        | 0.9262  | 0.0618 | 0.7042  | 0.1383 |
| OLIGO_03710 | AW462574 | MGC137146    | 0.1608  | 0.6635 | -0.0886 | 0.8026 |
| OLIGO_11423 | AW462575 | AGA          | -0.1869 | 0.6404 | 0.2955  | 0.4595 |
| OLIGO_07256 | AW462578 | PANK4        | -0.417  | 0.1528 | -0.1763 | 0.5281 |
| OLIGO_07411 | AW462580 | CCDC49       | 0.485   | 0.2272 | 0.0262  | 0.9447 |
| OLIGO_11357 | AW462583 | SLCO2A1      | 0.5643  | 0.3418 | -0.1962 | 0.7218 |
| OLIGO_07729 | AW462584 | GUSB         | -0.0435 | 0.8366 | -0.1719 | 0.3932 |
| OLIGO_07192 | AW462585 | DGKA         | -0.5256 | 0.1872 | -0.8227 | 0.0333 |
| OLIGO_08426 | AW462588 | Zzef1        | -0.0861 | 0.8604 | 0.193   | 0.6824 |
| OLIGO_02164 | AW462589 | SMARCA1      | -1.3649 | 0.0107 | -1.1565 | 0.0233 |
| OLIGO_07429 | AW462591 | ARMC1        | 0.0348  | 0.9076 | -0.019  | 0.9471 |
| OLIGO_07524 | AW462592 | TMEM97       | -0.2311 | 0.4795 | -0.0771 | 0.803  |
| OLIGO_07917 | AW462597 | CCL2         | -0.1501 | 0.7196 | 0.1768  | 0.651  |
| OLIGO_08092 | AW462599 | LOC506627    | 2.31    | 0      | 1.4736  | 0.0012 |
| OLIGO_07325 | AW462601 | EFNA4        | -0.0793 | 0.6937 | -0.4147 | 0.0318 |
| OLIGO_03712 | AW462606 | SMAD1        | -0.2718 | 0.5454 | -0.2268 | 0.5987 |
| OLIGO_08104 | AW462610 | MMP15        | -0.9106 | 0.0118 | -0.2409 | 0.4854 |
| OLIGO_03713 | AW462616 | SH2D4A       | -0.4182 | 0.5642 | -0.1637 | 0.8188 |
| OLIGO_08019 | AW462617 | PRSS15       | 0.19    | 0.5848 | 0.1057  | 0.753  |
| OLIGO_10623 | AW462621 | TAX1BP1      | -0.29   | 0.4477 | -0.1611 | 0.6594 |
| OLIGO_07444 | AW462623 | GRPEL2       | -0.7122 | 0.023  | -0.017  | 0.9547 |
| OLIGO_03714 | AW462634 | DNASE1L1     | 0.0503  | 0.863  | 0.0161  | 0.9542 |
| OLIGO_07759 | AW462636 | Wdr451       | 0.2573  | 0.2295 | 0.1476  | 0.471  |
| OLIGO_07843 | AW462637 | AGPAT5       | 0.0192  | 0.9583 | 0.3181  | 0.3638 |
| OLIGO_08713 | AW462639 | SIAHBP1      | 0.8731  | 0.0389 | 0.9648  | 0.0174 |
| OLIGO_07441 | AW462645 | 40436        | 0.5025  | 0.2611 | 0.2669  | 0.5333 |
| OLIGO_08126 | AW462649 | C1orf160     | -0.0096 | 0.9736 | 0.0797  | 0.7707 |
| OLIGO_03960 | AW462658 | STK24        | 0.0341  | 0.9413 | 0.3653  | 0.4117 |
| OLIGO_08428 | AW462662 | NGLY1        | -0.5524 | 0.2666 | 0.0203  | 0.9659 |
| OLIGO_07048 | AW462665 | TARBP2       | -0.0808 | 0.7692 | -0.1128 | 0.6693 |
| OLIGO_11371 | AW462667 | VKORC1       | -0.9841 | 0.1742 | -0.7473 | 0.2865 |
| OLIGO_08462 | AW462669 | LRRC8E       | 0.113   | 0.7786 | -0.0153 | 0.9683 |
| OLIGO_10778 | AW462671 | Rassf3       | 0.05    | 0.9056 | 0.3735  | 0.3847 |
| OLIGO_03717 | AW462672 | LOC652891    | 0.6909  | 0.1745 | 1.082   | 0.0268 |
| OLIGO_03970 | AW462673 | SERGEF       | -0.028  | 0.9554 | 0.2198  | 0.6566 |
| OLIGO_10758 | AW462674 | DES          | -1.2064 | 0.1178 | -0.442  | 0.4642 |
| OLIGO_08471 | AW462679 | ATP1B3       | 0.0666  | 0.8562 | 0.2403  | 0.4916 |
| OLIGO_03718 | AW462683 | TNIK         | -0.6116 | 0.444  | -0.3304 | 0.6711 |
| OLIGO_03962 | AW462691 | PHLDB2       | 0.8199  | 0.1878 | 0.1968  | 0.7328 |
| OLIGO_08640 | AW462694 | ZNF333       | 0.3412  | 0.7381 | -0.0701 | 0.9442 |
| OLIGO_08431 | AW462696 | SH3GLB2      | 0.4273  | 0.4918 | 0.2426  | 0.6868 |
| OLIGO_08230 | AW462697 | SRPK2        | 0.3542  | 0.2184 | -0.2698 | 0.3203 |



|             |          |           |         |        |         |        |
|-------------|----------|-----------|---------|--------|---------|--------|
| OLIGO_09686 | AW462698 | TMEM42    | -0.0009 | 0.9981 | -0.2624 | 0.4839 |
| OLIGO_03963 | AW462702 | PIP5K2C   | 0.137   | 0.7845 | 0.2701  | 0.5851 |
| OLIGO_03964 | AW462703 | HYI       | 0.3298  | 0.3904 | 0.1891  | 0.6092 |
| OLIGO_03719 | AW462705 | CPNE3     | 0.251   | 0.5321 | 0.176   | 0.6468 |
| OLIGO_08714 | AW462706 | MOBK1B    | 0.6224  | 0.0378 | 1.0119  | 0.0005 |
| OLIGO_11428 | AW462708 | ABHD6     | 0.3273  | 0.3913 | 0.1728  | 0.6342 |
| OLIGO_08328 | AW462711 | LOC616635 | 0.2167  | 0.7829 | -0.2074 | 0.7869 |
| OLIGO_08437 | AW462713 | WARS2     | 0.2204  | 0.6158 | -0.1535 | 0.7155 |
| OLIGO_08478 | AW462714 | IL15RA    | 0.2384  | 0.5785 | 0.1693  | 0.6808 |
| OLIGO_08433 | AW462717 | LOC51149  | -0.7072 | 0.1172 | -0.1825 | 0.6719 |
| OLIGO_10615 | AW462718 | RPL14     | -0.4502 | 0.2523 | -0.1318 | 0.7244 |
| OLIGO_03720 | AW462720 | INCENP    | -0.1053 | 0.7891 | -0.2877 | 0.4459 |
| OLIGO_03721 | AW462721 | FADD      | 0.121   | 0.8068 | 0.1383  | 0.776  |
| OLIGO_10665 | AW462723 | PIN1      | 0.2996  | 0.4417 | 0.0223  | 0.9525 |
| OLIGO_06999 | AW462724 | NPM1      | 0.4163  | 0.478  | 0.3216  | 0.5675 |
| OLIGO_10745 | AW462725 | ADI1      | -0.2926 | 0.639  | -0.2465 | 0.6844 |
| OLIGO_10535 | AW462727 | KIAA1522  | -0.1576 | 0.6431 | 0.0385  | 0.9057 |
| OLIGO_07844 | AW462728 | MLLT4     | -0.2249 | 0.6943 | -0.1638 | 0.7652 |
| OLIGO_08434 | AW462731 | CSNK1G3   | -0.031  | 0.9253 | -0.0332 | 0.9181 |
| OLIGO_08524 | AW462733 | RPN1      | -0.497  | 0.2478 | 0.1567  | 0.7038 |
| OLIGO_08243 | AW462739 | SFT2D1    | 0.7708  | 0.0969 | 0.5363  | 0.2272 |
| OLIGO_08662 | AW462747 | PLS3      | 0.4461  | 0.2584 | 0.0253  | 0.9467 |
| OLIGO_03968 | AW462753 | PRRG2     | -0.1494 | 0.7371 | -0.1367 | 0.7523 |
| OLIGO_07240 | AW462757 | ZNF207    | -0.1639 | 0.5564 | 0.2987  | 0.2663 |
| OLIGO_08600 | AW462770 | MGC3265   | 0.1686  | 0.6254 | -0.01   | 0.9758 |
| OLIGO_08608 | AW462778 | MMACHC    | -0.2625 | 0.4707 | -0.0997 | 0.7697 |
| OLIGO_08442 | AW462786 | ZF        | 0.3725  | 0.3496 | 0.1959  | 0.6044 |
| OLIGO_08443 | AW462792 | MRPL32    | 0.4403  | 0.1105 | 0.0171  | 0.9485 |
| OLIGO_03969 | AW462799 | NAPIL5    | -0.3208 | 0.4737 | -0.199  | 0.6428 |
| OLIGO_07191 | AW462800 | PROS1     | -2.2492 | 0.0011 | -1.6044 | 0.0164 |
| OLIGO_03723 | AW462803 | C9orf25   | 0.1062  | 0.7515 | -0.3032 | 0.3433 |
| OLIGO_08348 | AW462805 | VPS25     | 0.3162  | 0.2245 | 0.2229  | 0.3715 |
| OLIGO_08413 | AW462806 | FNTA      | 0.1608  | 0.7049 | 0.7563  | 0.0933 |
| OLIGO_06901 | AW462807 | OACT2     | -0.7039 | 0.0369 | -0.2174 | 0.499  |
| OLIGO_08559 | AW462809 | C10orf35  | -0.2074 | 0.4849 | -0.1789 | 0.5293 |
| OLIGO_08445 | AW462812 | KLF9      | 1.0677  | 0.1898 | 0.3545  | 0.6546 |
| OLIGO_03725 | AW462817 | LIPH      | 0.3053  | 0.2959 | 0.213   | 0.449  |
| OLIGO_03726 | AW462818 | MRPS24    | 0.2879  | 0.4729 | 0.2812  | 0.4647 |
| OLIGO_07406 | AW462820 | AHCY      | -0.2161 | 0.6693 | -0.2142 | 0.6587 |
| OLIGO_03971 | AW462822 | XRCC1     | -0.2778 | 0.2738 | -0.1619 | 0.5027 |
| OLIGO_10781 | AW462823 | LOC506420 | -0.1035 | 0.7462 | -0.2552 | 0.4028 |
| OLIGO_08446 | AW462824 | HMG20B    | -0.0476 | 0.9226 | 0.523   | 0.2659 |
| OLIGO_10073 | AW462834 | LOC388519 | -0.9316 | 0.0033 | -0.3089 | 0.3078 |
| OLIGO_08447 | AW462836 | ABHD10    | -0.4481 | 0.216  | 0.1304  | 0.7059 |
| OLIGO_08448 | AW462842 | CDC42SE1  | 0.5806  | 0.1834 | 0.5445  | 0.1932 |
| OLIGO_08449 | AW462843 | CFLAR     | 0.1493  | 0.7156 | -0.2475 | 0.5289 |
| OLIGO_03973 | AW462844 | UBXD8     | -0.6347 | 0.1597 | 0.0866  | 0.8408 |
| OLIGO_08280 | AW462848 | SP100     | -0.3058 | 0.4365 | -0.3391 | 0.3679 |
| OLIGO_08430 | AW462851 | CRELD2    | 0.2421  | 0.3461 | 0.2504  | 0.3096 |
| OLIGO_10601 | AW462860 | AKT1      | 0.0762  | 0.9072 | 0.1322  | 0.8324 |
| OLIGO_08450 | AW462861 | GBA       | -0.0855 | 0.7009 | -0.2574 | 0.2275 |
| OLIGO_08451 | AW462864 | PJA1      | 0.0604  | 0.8422 | 0.0943  | 0.7458 |
| OLIGO_08150 | AW462866 | EIF5A     | 0.4509  | 0.4049 | 0.1602  | 0.7575 |
| OLIGO_03728 | AW462873 | WWC1      | 0.2736  | 0.6317 | -0.2049 | 0.7116 |
| OLIGO_08514 | AW462876 | AKR1A1    | 0.7109  | 0.0426 | 0.3994  | 0.2351 |

|             |          |           |         |        |         |        |
|-------------|----------|-----------|---------|--------|---------|--------|
| OLIGO_08237 | AW462882 | SCARA5    | 0.1754  | 0.6542 | 0.1807  | 0.6167 |
| OLIGO_03729 | AW462885 | Stk35     | -0.4747 | 0.0688 | -0.1309 | 0.5967 |
| OLIGO_08424 | AW462887 | ZFP64     | -0.7065 | 0.2766 | -0.4916 | 0.439  |
| OLIGO_12524 | AW462889 | ACTG2     | -0.5867 | 0.4167 | -0.0593 | 0.9322 |
| OLIGO_07895 | AW462891 | TRRAP     | 0.4601  | 0.0509 | 0.2007  | 0.3718 |
| OLIGO_08251 | AW462892 | CYP11A1   | -1.2939 | 0.0829 | -0.8196 | 0.2509 |
| OLIGO_08531 | AW462895 | CRIP1     | -0.9822 | 0.0264 | -0.3408 | 0.4227 |
| OLIGO_08453 | AW462899 | NAPA      | 0.7164  | 0.3315 | 0.6168  | 0.3832 |
| OLIGO_06644 | AW462901 | GMFG      | -0.8392 | 0.0137 | -0.4381 | 0.1773 |
| OLIGO_10034 | AW462906 | LOC512236 | 0.314   | 0.1332 | 0.061   | 0.7604 |
| OLIGO_10699 | AW462911 | WNT4      | -0.3769 | 0.4606 | -0.3217 | 0.5112 |
| OLIGO_03730 | AW462913 | RBM9      | 0.1774  | 0.564  | 0.2154  | 0.4835 |
| OLIGO_07196 | AW462924 | RAB1A     | 0.6201  | 0.2015 | 0.0022  | 0.9962 |
| OLIGO_08021 | AW462925 | GPS1      | 0.2886  | 0.4442 | 0.2299  | 0.5249 |
| OLIGO_06537 | AW462937 | MSH2      | 0.5043  | 0.1233 | 0.0098  | 0.9749 |
| OLIGO_01679 | AW462941 | GNAI3     | -0.1831 | 0.5495 | 0.0302  | 0.9175 |
| OLIGO_06547 | AW462944 | HSPC148   | 0.317   | 0.2444 | 0.3763  | 0.1491 |
| OLIGO_10172 | AW462946 | RBM14     | 0.1566  | 0.6266 | -0.1983 | 0.5204 |
| OLIGO_03731 | AW462951 | Ptp4a2    | 0.2843  | 0.2949 | 0.1807  | 0.4865 |
| OLIGO_08946 | AW462952 | NP        | 0.6473  | 0.0332 | 0.826   | 0.0046 |
| OLIGO_09097 | AW462955 | MOSPD1    | 0.0234  | 0.9678 | 0.2322  | 0.6838 |
| OLIGO_08274 | AW462956 | BNIP3     | 0.3832  | 0.3494 | 0.1797  | 0.6305 |
| OLIGO_08952 | AW462961 | SLMAP     | -1.1907 | 0.0467 | -0.5753 | 0.286  |
| OLIGO_03987 | AW462963 | FLJ13576  | -0.4398 | 0.4172 | -0.4226 | 0.4266 |
| OLIGO_10881 | AW462964 | RNPC1     | -1.1515 | 0.0072 | -0.4188 | 0.3065 |
| OLIGO_09151 | AW462965 | INSL3     | -0.095  | 0.7325 | -0.1106 | 0.6777 |
| OLIGO_10975 | AW462967 | SND1      | 0.7171  | 0.051  | -0.0625 | 0.8589 |
| OLIGO_03732 | AW462972 | ACE       | 0.0804  | 0.8312 | -0.0034 | 0.9926 |
| OLIGO_09043 | AW462974 | ENAH      | -1.4502 | 0.0212 | -0.6019 | 0.3171 |
| OLIGO_03981 | AW462979 | UBL7      | 0.1311  | 0.6026 | 0.1438  | 0.5514 |
| OLIGO_08893 | AW462980 | ZUBR1     | -0.0331 | 0.9137 | 0.2275  | 0.4522 |
| OLIGO_09154 | AW462983 | ZNF34     | -0.7471 | 0.0245 | -0.8285 | 0.0092 |
| OLIGO_10473 | AW462985 | BIRC5     | 0.2897  | 0.5815 | 0.7227  | 0.1522 |
| OLIGO_06603 | AW462994 | NUP62     | -0.1858 | 0.7284 | -0.1315 | 0.7977 |
| OLIGO_06708 | AW462998 | C6orf129  | 0.0663  | 0.8582 | -0.2287 | 0.5284 |
| OLIGO_08456 | AW463001 | TSCOT     | 0.1652  | 0.664  | -0.213  | 0.5592 |
| OLIGO_09114 | AW463002 | P117      | -0.0154 | 0.9639 | 0.1949  | 0.5503 |
| OLIGO_08872 | AW463008 | UBE2N     | 0.3262  | 0.2254 | 0.2328  | 0.3664 |
| OLIGO_08252 | AW463009 | MIF       | 0.7389  | 0.1729 | 0.5554  | 0.2851 |
| OLIGO_03734 | AW463013 | CCDC12    | 0.0409  | 0.9231 | 0.2116  | 0.6183 |
| OLIGO_10870 | AW463019 | LOC618700 | 0.1952  | 0.4545 | 0.0481  | 0.8476 |
| OLIGO_08650 | AW463027 | C11orf73  | -0.277  | 0.5627 | -0.1506 | 0.7427 |
| OLIGO_09119 | AW463031 | STK10     | 0.9461  | 0.0538 | -0.389  | 0.3306 |
| OLIGO_09169 | AW463032 | SITPEC    | -0.4908 | 0.1682 | -0.2224 | 0.5145 |
| OLIGO_08780 | AW463035 | STARD7    | 0.2598  | 0.2634 | 0.2094  | 0.3468 |
| OLIGO_11431 | AW463043 | OBFC2A    | -0.6085 | 0.1931 | 0.0237  | 0.9578 |
| OLIGO_08822 | AW463046 | KIAA1704  | 1.6621  | 0.0038 | 0.469   | 0.3921 |
| OLIGO_08860 | AW463047 | WDR51A    | 0.5889  | 0.058  | 0.3644  | 0.2199 |
| OLIGO_03984 | AW463048 | OSGEP     | 0.0213  | 0.94   | 0.4829  | 0.0743 |
| OLIGO_08722 | AW463051 | FH        | 0.0068  | 0.9877 | 0.2283  | 0.5916 |
| OLIGO_08718 | AW463052 | HSPC111   | 0.278   | 0.4225 | 0.2078  | 0.5317 |
| OLIGO_06833 | AW463054 | LOC553158 | -1.5673 | 0.008  | -0.5134 | 0.3634 |
| OLIGO_03983 | AW463057 | NQO1      | 0.5276  | 0.1769 | 0.3482  | 0.3523 |
| OLIGO_01976 | AW463060 | CAST      | 0.1127  | 0.7782 | 0.4404  | 0.2512 |
| OLIGO_08729 | AW463061 | DREV1     | 0.6757  | 0.0938 | 0.2619  | 0.4953 |

|             |          |           |         |        |         |        |
|-------------|----------|-----------|---------|--------|---------|--------|
| OLIGO_11433 | AW463062 | KIAA0194  | -0.2828 | 0.3644 | -0.0855 | 0.7746 |
| OLIGO_03899 | AW463063 | SPINT1    | -0.7935 | 0.3359 | -0.657  | 0.4065 |
| OLIGO_07452 | AW463065 | HSA277841 | 0.2653  | 0.6176 | 0.109   | 0.8313 |
| OLIGO_08789 | AW463067 | PPP2R2A   | 0.3594  | 0.0938 | 0.1454  | 0.4774 |
| OLIGO_07944 | AW463070 | RPS6KB1   | -0.1557 | 0.8078 | -0.6307 | 0.3065 |
| OLIGO_09131 | AW463075 | C1orf61   | 1.4464  | 0.0008 | 0.8916  | 0.0298 |
| OLIGO_03563 | AW463077 | RBM9      | 0.3395  | 0.6923 | 0.0287  | 0.9727 |
| OLIGO_10547 | AW463080 | PFN1      | 0.9768  | 0.046  | 0.5444  | 0.2454 |
| OLIGO_11430 | AW463084 | ICF45     | -0.2809 | 0.3885 | 0.3715  | 0.2343 |
| OLIGO_03735 | AW463087 | COQ2      | 0.4046  | 0.1758 | 0.3735  | 0.1909 |
| OLIGO_08610 | AW463090 | DDIT3     | 0.3544  | 0.2322 | 0.1552  | 0.5849 |
| OLIGO_09022 | AW463092 | MTA3      | -1.1078 | 0.0136 | -0.1597 | 0.7076 |
| OLIGO_07455 | AW463093 | IPO8      | 0.4435  | 0.0719 | 0.4362  | 0.0643 |
| OLIGO_03736 | AW463094 | BRAF      | -0.2038 | 0.6186 | 0.087   | 0.8246 |
| OLIGO_07752 | AW463097 | XBP1      | 0.0292  | 0.9317 | -0.1209 | 0.7158 |
| OLIGO_06545 | AW463099 | RPL19     | 0.5371  | 0.4485 | 0.7238  | 0.287  |
| OLIGO_10671 | AW463103 | CLTC      | 0.6268  | 0.3168 | 0.7045  | 0.2327 |
| OLIGO_08979 | AW463108 | PAGE4     | 0.0933  | 0.8647 | -0.0149 | 0.9773 |
| OLIGO_09145 | AW463110 | FLJ22624  | -0.2132 | 0.4689 | -0.1352 | 0.6318 |
| OLIGO_11000 | AW463111 | TRIM71    | -0.5905 | 0.4636 | -0.5175 | 0.5126 |
| OLIGO_03975 | AW463114 | MATN2     | 1.1728  | 0.1249 | 0.2688  | 0.7135 |
| OLIGO_10460 | AW463116 | PDF       | -0.459  | 0.441  | -0.485  | 0.3959 |
| OLIGO_08717 | AW463120 | UBE2S     | 0.6195  | 0.1001 | 0.113   | 0.754  |
| OLIGO_08032 | AW463121 | CD151     | -0.1986 | 0.6662 | 0.2166  | 0.6234 |
| OLIGO_00498 | AW463124 | UBL4A     | -0.2186 | 0.6111 | -0.1865 | 0.651  |
| OLIGO_10576 | AW463125 | RPL41     | 0.145   | 0.7657 | 0.635   | 0.1737 |
| OLIGO_08964 | AW463127 | NADSYN1   | -0.5613 | 0.1346 | -0.416  | 0.2472 |
| OLIGO_06906 | AW463130 | KRIT1     | 0.5579  | 0.1388 | -0.1234 | 0.7325 |
| OLIGO_08315 | AW463132 | C6orf130  | 0.1531  | 0.5936 | -0.1673 | 0.5419 |
| OLIGO_03979 | AW463134 | SPTLC1    | 0.031   | 0.9418 | 0.1145  | 0.783  |
| OLIGO_09055 | AW463139 | WDR17     | -0.6916 | 0.1694 | -0.4653 | 0.337  |
| OLIGO_03986 | AW463142 | PIGC      | -0.0678 | 0.884  | 0.2858  | 0.5354 |
| OLIGO_03977 | AW463143 | ATP5L     | 0.4326  | 0.1193 | 0.2362  | 0.3702 |
| OLIGO_11496 | AW463149 | LASS2     | 0.6161  | 0.0029 | 0.372   | 0.0569 |
| OLIGO_03978 | AW463151 | ALG2      | -0.5236 | 0.234  | -0.1337 | 0.7304 |
| OLIGO_08998 | AW463156 | ZFP36L2   | 0.3953  | 0.4283 | 0.1806  | 0.7057 |
| OLIGO_07133 | AW463160 | BAZ1B     | -0.0915 | 0.673  | 0.158   | 0.4465 |
| OLIGO_09177 | AW463162 | TAF7      | 0.8608  | 0.0106 | 0.3445  | 0.283  |
| OLIGO_09127 | AW463165 | RBP4      | -2.4362 | 0      | -1.3811 | 0.0097 |
| OLIGO_08715 | AW463167 | C20orf43  | 0.4659  | 0.2705 | 0.5388  | 0.2022 |
| OLIGO_11023 | AW463169 | MIF4GD    | 0.0842  | 0.8003 | 0.2231  | 0.5023 |
| OLIGO_03738 | AW463171 | APTX      | -0.8908 | 0.3563 | -0.4515 | 0.631  |
| OLIGO_10841 | AW463172 | WDR45     | -0.0884 | 0.8543 | -0.1201 | 0.7986 |
| OLIGO_11432 | AW463174 | C20orf45  | -0.6013 | 0.177  | -0.0926 | 0.8188 |
| OLIGO_11272 | AW463176 | FBLN2     | -1.2908 | 0.0744 | -0.2542 | 0.7136 |
| OLIGO_03985 | AW463182 | TEX2      | 0.5593  | 0.0409 | 0.3819  | 0.1437 |
| OLIGO_03302 | AW463187 | RPIA      | 0.4393  | 0.1359 | 0.218   | 0.4369 |
| OLIGO_10740 | AW463190 | CDV3      | -0.2738 | 0.5718 | -0.3804 | 0.4127 |
| OLIGO_08467 | AW463194 | ELK4      | 0.7563  | 0.0148 | 0.6614  | 0.0269 |
| OLIGO_10892 | AW463195 | PRRT3     | -0.1798 | 0.6626 | -0.2986 | 0.4499 |
| OLIGO_11307 | AW463197 | RERE      | 0.5204  | 0.2534 | 0.2245  | 0.6061 |
| OLIGO_08468 | AW463203 | CCDC68    | -0.2829 | 0.5466 | 0.0082  | 0.9853 |
| OLIGO_08475 | AW463204 | WBP4      | -0.3088 | 0.4417 | 0.3925  | 0.3351 |
| OLIGO_08470 | AW463210 | PLAUR     | -0.3782 | 0.3254 | -0.4168 | 0.257  |
| OLIGO_03742 | AW463212 | DIP13B    | 0.1034  | 0.7614 | 0.1731  | 0.5951 |

|             |          |           |         |        |         |        |
|-------------|----------|-----------|---------|--------|---------|--------|
| OLIGO_03743 | AW463219 | MGC137697 | -0.0502 | 0.8971 | -0.1386 | 0.7098 |
| OLIGO_11376 | AW463226 | C5orf15   | 0.0972  | 0.802  | 0.0237  | 0.9492 |
| OLIGO_03744 | AW463227 | GNG12     | -0.1621 | 0.7234 | 0.2146  | 0.6244 |
| OLIGO_09235 | AW463229 | C17orf81  | 0.2115  | 0.5894 | 0.1099  | 0.7736 |
| OLIGO_09471 | AW463237 | SFRS1     | 0.3722  | 0.3032 | -0.097  | 0.7794 |
| OLIGO_09643 | AW463241 | TNFRSF12A | 0.2488  | 0.6298 | 0.1307  | 0.7917 |
| OLIGO_09287 | AW463243 | TMEM51    | 0.0279  | 0.9295 | 0.1826  | 0.5462 |
| OLIGO_08710 | AW463245 | BAIAP2    | -0.0871 | 0.7464 | -0.2544 | 0.325  |
| OLIGO_09478 | AW463247 | ATP6V1D   | 0.2761  | 0.5393 | 0.5546  | 0.1988 |
| OLIGO_09609 | AW463251 | GALNT3    | 0.3015  | 0.415  | 0.4708  | 0.1847 |
| OLIGO_08483 | AW463256 | HIC2      | -2.1241 | 0.0187 | -1.1088 | 0.1562 |
| OLIGO_03748 | AW463258 | PPP1R15B  | 0.0167  | 0.975  | -0.4267 | 0.4271 |
| OLIGO_09591 | AW463262 | LOC56902  | -0.1248 | 0.6769 | -0.1172 | 0.6822 |
| OLIGO_08365 | AW463268 | ELF3      | 0.1437  | 0.7609 | 0.2326  | 0.6166 |
| OLIGO_10572 | AW463272 | ATP6V1F   | 0.0111  | 0.9806 | -0.7585 | 0.0856 |
| OLIGO_10936 | AW463280 | RPL5      | 0.9244  | 0.0975 | 0.1845  | 0.7003 |
| OLIGO_03749 | AW463281 | CCDC64    | 0.5085  | 0.087  | 0.032   | 0.9103 |
| OLIGO_11498 | AW463286 | TBC1D17   | 0.2228  | 0.5515 | 0.2501  | 0.4936 |
| OLIGO_00541 | AW463287 | ANAPC2    | -0.0021 | 0.9954 | 0.0526  | 0.8786 |
| OLIGO_07804 | AW463291 | USP2      | 0.6976  | 0.0851 | 0.4418  | 0.2527 |
| OLIGO_09616 | AW463292 | TSC22D1   | -0.8109 | 0.1669 | -0.242  | 0.6667 |
| OLIGO_11612 | AW463296 | MSX2P     | -0.7385 | 0.2458 | -0.6019 | 0.3237 |
| OLIGO_11373 | AW463297 | RAB7      | 0.6145  | 0.1536 | 0.5977  | 0.1477 |
| OLIGO_08250 | AW463299 | RNF7      | 0.815   | 0.008  | 0.594   | 0.0442 |
| OLIGO_10636 | AW463305 | TPM4      | 0.8582  | 0.1009 | 0.4573  | 0.3614 |
| OLIGO_06673 | AW463306 | GOLGB1    | -0.2935 | 0.5415 | -0.314  | 0.5017 |
| OLIGO_03745 | AW463308 | THRAP5    | 0.2724  | 0.3828 | -0.2225 | 0.4618 |
| OLIGO_03746 | AW463310 | FBXO30    | -0.2592 | 0.5921 | -0.523  | 0.2596 |
| OLIGO_09529 | AW463314 | NIPSNAP1  | -0.2214 | 0.5714 | -0.0013 | 0.9972 |
| OLIGO_09561 | AW463315 | C11orf75  | 0.0713  | 0.8147 | 0.406   | 0.1645 |
| OLIGO_07143 | AW463319 | HMGCR     | 0.333   | 0.2899 | 0.3265  | 0.2792 |
| OLIGO_09444 | AW463323 | SC65      | 0.4     | 0.3551 | 0.1229  | 0.7669 |
| OLIGO_08474 | AW463325 | BCCIP     | -0.2195 | 0.5657 | 0.2152  | 0.5569 |
| OLIGO_02804 | AW463331 | NOB1      | -0.0264 | 0.9406 | 0.3319  | 0.3295 |
| OLIGO_09498 | AW463332 | PTPN11    | 0.2275  | 0.6515 | 0.4953  | 0.3044 |
| OLIGO_09252 | AW463337 | BPNT1     | -0.0776 | 0.7804 | 0.133   | 0.6181 |
| OLIGO_06762 | AW463340 | MGC127123 | 0.0553  | 0.8248 | 0.5028  | 0.0355 |
| OLIGO_10160 | AW463344 | PRPF8     | 0.3359  | 0.3018 | -0.5023 | 0.1068 |
| OLIGO_09518 | AW463345 | LAT2      | 0.953   | 0.0968 | 0.6127  | 0.2651 |
| OLIGO_09666 | AW463346 | CLDN1     | -0.7631 | 0.1615 | 0.1142  | 0.8266 |
| OLIGO_10702 | AW463357 | MCM7      | -0.1207 | 0.6549 | -0.1695 | 0.5096 |
| OLIGO_08477 | AW463359 | PHB       | 0.1071  | 0.7326 | 0.0377  | 0.8999 |
| OLIGO_09243 | AW463361 | PTGES     | -0.2353 | 0.52   | -0.1729 | 0.6219 |
| OLIGO_08338 | AW463363 | KIAA0323  | -0.6923 | 0.0937 | -0.2451 | 0.537  |
| OLIGO_11245 | AW463368 | PC        | -0.1115 | 0.7177 | 0.273   | 0.3561 |
| OLIGO_09413 | AW463371 | LPIN1     | -0.0726 | 0.8593 | 0.1626  | 0.6803 |
| OLIGO_03065 | AW463372 | DHX8      | -0.1253 | 0.8486 | 0.0662  | 0.9162 |
| OLIGO_09316 | AW463379 | SAFB      | 0.514   | 0.3171 | 0.5487  | 0.2655 |
| OLIGO_11273 | AW463384 | NEU1      | -0.6276 | 0.136  | -0.2862 | 0.4633 |
| OLIGO_03750 | AW463385 | TAZ       | 0.0247  | 0.9476 | -0.0521 | 0.885  |
| OLIGO_11750 | AW463388 | C14orf147 | 0.0912  | 0.8295 | 0.0765  | 0.85   |
| OLIGO_08390 | AW463393 | BET1      | -0.9034 | 0.0561 | -0.0072 | 0.9862 |
| OLIGO_08490 | AW463397 | CAMKK1    | -0.0343 | 0.8715 | -0.0408 | 0.8402 |
| OLIGO_09707 | AW463398 | IRF6      | 0.8557  | 0.0478 | 0.1238  | 0.7647 |
| OLIGO_11381 | AW463402 | POR       | 0.0259  | 0.9004 | -0.1073 | 0.5897 |

|             |          |           |         |        |         |        |
|-------------|----------|-----------|---------|--------|---------|--------|
| OLIGO_01293 | AW463403 | 40244     | 0.4842  | 0.2477 | 0.3428  | 0.3913 |
| OLIGO_10550 | AW463406 | PAFAH1B3  | -0.5234 | 0.1245 | -0.0734 | 0.8229 |
| OLIGO_10933 | AW463410 | LRRC32    | -0.8362 | 0.349  | -0.0311 | 0.971  |
| OLIGO_09535 | AW463417 | PDLIM2    | 0.014   | 0.9751 | -0.317  | 0.4628 |
| OLIGO_03752 | AW463421 | EPB41L1   | 0.1005  | 0.777  | -0.2409 | 0.4789 |
| OLIGO_00081 | AW463422 | PPIL1     | 0.2734  | 0.4081 | 0.2217  | 0.4832 |
| OLIGO_08493 | AW463423 | LOC511318 | -1.2005 | 0.0194 | -0.5327 | 0.2759 |
| OLIGO_03753 | AW463438 | BC002942  | -0.318  | 0.3747 | -0.0057 | 0.9867 |
| OLIGO_03754 | AW463450 | ATP6V0E   | -0.2818 | 0.4678 | 0.0484  | 0.8963 |
| OLIGO_09505 | AW463451 | SLC19A2   | -0.1136 | 0.8157 | 0.3774  | 0.4194 |
| OLIGO_08494 | AW463458 | UPK1B     | -1.6355 | 0.0151 | -0.7494 | 0.1925 |
| OLIGO_08495 | AW463465 | D6Wsu163e | -0.4302 | 0.5204 | 0.0818  | 0.9002 |
| OLIGO_09712 | AW463470 | CNAP1     | -0.3881 | 0.5887 | -0.0059 | 0.9932 |
| OLIGO_03755 | AW463471 | FAM43A    | -0.2115 | 0.507  | -0.0528 | 0.8619 |
| OLIGO_03857 | AW463472 | PRG1      | -1.3759 | 0.1089 | 0.0512  | 0.9504 |
| OLIGO_03756 | AW463474 | CENPH     | 0.017   | 0.9791 | 0.3237  | 0.6135 |
| OLIGO_07391 | AW463476 | VTI1B     | 0.7855  | 0.1429 | 0.7956  | 0.1217 |
| OLIGO_09682 | AW463479 | C14orf101 | 0.2324  | 0.5129 | -0.131  | 0.7003 |
| OLIGO_10588 | AW463480 | LPHN2     | -1.932  | 0.0005 | -0.8206 | 0.1195 |
| OLIGO_11056 | AW463481 | DNAJC16   | -0.6409 | 0.4217 | -0.0773 | 0.9167 |
| OLIGO_08497 | AW463483 | FAM20C    | -0.1977 | 0.667  | -0.0365 | 0.9341 |
| OLIGO_08498 | AW463485 | ELF2      | -0.0826 | 0.7901 | 0.1537  | 0.6039 |
| OLIGO_11461 | AW463493 | CDC20     | -0.6188 | 0.0495 | -0.1296 | 0.6652 |
| OLIGO_06781 | AW463495 | MORF4L1   | 0.3278  | 0.4647 | -0.0111 | 0.9795 |
| OLIGO_03758 | AW463498 | COL7A1    | -0.0949 | 0.8003 | -0.4346 | 0.2275 |
| OLIGO_09893 | AW463501 | RAB32     | 0.2645  | 0.4894 | 0.2869  | 0.435  |
| OLIGO_09791 | AW463507 | DYNC1I2   | 0.0147  | 0.957  | 0.0062  | 0.981  |
| OLIGO_06602 | AW463516 | PRDX2     | -0.2979 | 0.4524 | -0.3014 | 0.4264 |
| OLIGO_05624 | AW463521 | OAS1      | 0.642   | 0.4675 | 0.4662  | 0.5891 |
| OLIGO_03759 | AW463522 | UCHL1     | 1.1058  | 0.0569 | 0.244   | 0.66   |
| OLIGO_09747 | AW463524 | MYL9      | -0.3509 | 0.4288 | -0.3889 | 0.3604 |
| OLIGO_11114 | AW463528 | C7orf24   | -0.4508 | 0.4058 | -0.0572 | 0.912  |
| OLIGO_10810 | AW463531 | FOSL2     | 0.7435  | 0.0764 | 0.9243  | 0.0217 |
| OLIGO_06843 | AW463539 | LOC546078 | 0.2006  | 0.6177 | -0.1354 | 0.7252 |
| OLIGO_08407 | AW463541 | MARVELD3  | -0.5993 | 0.1588 | -0.1624 | 0.6931 |
| OLIGO_03761 | AW463542 | NEK7      | 0.0421  | 0.9049 | 0.0719  | 0.8311 |
| OLIGO_08499 | AW463544 | PCQAP     | 0.297   | 0.1038 | 0.1483  | 0.3959 |
| OLIGO_06699 | AW463557 | ITGB4BP   | 0.2966  | 0.3019 | 0.1032  | 0.7072 |
| OLIGO_08505 | AW463561 | NAPRT1    | -0.0128 | 0.9708 | -0.1559 | 0.6471 |
| OLIGO_08463 | AW463564 | TMEM1     | -0.1079 | 0.8221 | -0.2269 | 0.6218 |
| OLIGO_03764 | AW463565 | C21orf45  | -0.764  | 0.2872 | -0.4447 | 0.5083 |
| OLIGO_09849 | AW463573 | DIDO1     | 0.1291  | 0.8403 | 0.1951  | 0.7583 |
| OLIGO_03765 | AW463585 | FBXO42    | 1.2151  | 0.0404 | 0.9393  | 0.0982 |
| OLIGO_11020 | AW463586 | CDK2AP1   | -0.2482 | 0.5245 | -0.44   | 0.2724 |
| OLIGO_08510 | AW463587 | S100A14   | -0.0754 | 0.8139 | 0.3153  | 0.3047 |
| OLIGO_03766 | AW463590 | MLLT6     | 0.2382  | 0.3875 | 0.0706  | 0.7869 |
| OLIGO_03767 | AW463591 | ZMAT5     | 0.1552  | 0.85   | -0.0937 | 0.9075 |
| OLIGO_06872 | AW463595 | NEK7      | 0.511   | 0.3016 | 0.589   | 0.2144 |
| OLIGO_10811 | AW463599 | NOS2A     | -0.0582 | 0.843  | -0.136  | 0.6291 |
| OLIGO_09803 | AW463615 | MLLT4     | -0.9681 | 0.326  | -2.0766 | 0.0342 |
| OLIGO_08515 | AW463620 | PSMF1     | -0.5497 | 0.2299 | -0.2768 | 0.5283 |
| OLIGO_08516 | AW463624 | SLC25A25  | -0.1074 | 0.787  | 0.2306  | 0.5471 |
| OLIGO_10359 | AW463627 | GATAD1    | -0.3548 | 0.5093 | -0.0502 | 0.9227 |
| OLIGO_08364 | AW463631 | NDUFA1    | 0.5133  | 0.146  | 0.545   | 0.1075 |
| OLIGO_03768 | AW463635 | KIAA1787  | 0.0151  | 0.9572 | -0.0822 | 0.76   |

|             |          |           |         |        |         |        |
|-------------|----------|-----------|---------|--------|---------|--------|
| OLIGO_11386 | AW463637 | LOC643102 | -0.2971 | 0.5994 | -0.3549 | 0.5129 |
| OLIGO_03769 | AW463640 | SS18L1    | 0.2874  | 0.3865 | -0.03   | 0.9181 |
| OLIGO_03770 | AW463645 | ERG       | -0.0023 | 0.995  | -0.227  | 0.5361 |
| OLIGO_08523 | AW463646 | CXCL16    | -0.2125 | 0.6988 | -0.0126 | 0.9808 |
| OLIGO_08517 | AW463648 | CDH1      | -0.9927 | 0.1588 | -0.1899 | 0.779  |
| OLIGO_03771 | AW463651 | C1orf91   | -0.5153 | 0.1088 | -0.0676 | 0.826  |
| OLIGO_11588 | AW463653 | MAFG      | 0.5123  | 0.2181 | 0.3932  | 0.3184 |
| OLIGO_08518 | AW463654 | MFN2      | -0.0377 | 0.9009 | -0.2736 | 0.3481 |
| OLIGO_03772 | AW463655 | SPIN1     | -0.449  | 0.2644 | -0.1803 | 0.6401 |
| OLIGO_03773 | AW463665 | Pea15     | 0.5778  | 0.4104 | 0.2625  | 0.6984 |
| OLIGO_07676 | AW463668 | NIFUN     | -0.0927 | 0.8259 | 0.2846  | 0.4798 |
| OLIGO_03775 | AW463671 | YRDC      | 0.6579  | 0.0358 | 0.4989  | 0.0963 |
| OLIGO_09291 | AW463677 | RPL5      | -0.4167 | 0.2881 | -0.2086 | 0.579  |
| OLIGO_04598 | AW463678 | TMBIM1    | -0.1814 | 0.6629 | 0.3895  | 0.3315 |
| OLIGO_03776 | AW463683 | LOC51315  | 0.2464  | 0.4498 | 0.5445  | 0.0811 |
| OLIGO_03777 | AW463689 | BXDC1     | -0.0657 | 0.8089 | 0.0244  | 0.9251 |
| OLIGO_08527 | AW463694 | ERCC1     | -0.0358 | 0.9498 | -0.1245 | 0.8195 |
| OLIGO_09872 | AW463695 | TXNL1     | 0.7372  | 0.1051 | 0.1257  | 0.7804 |
| OLIGO_09123 | AW463696 | GPR107    | -0.0652 | 0.8478 | -0.0075 | 0.9817 |
| OLIGO_11085 | AW463697 | SOCS1     | -1.0826 | 0.0073 | -0.3905 | 0.3108 |
| OLIGO_08144 | AW463701 | MKL1      | 0.3345  | 0.2311 | 0.0076  | 0.9774 |
| OLIGO_03779 | AW463705 | SLC7A7    | 0.0385  | 0.9268 | -0.2117 | 0.598  |
| OLIGO_10760 | AW463707 | UBE2D2    | 0.8448  | 0.0805 | 0.5531  | 0.2322 |
| OLIGO_08529 | AW463709 | CTNS      | -0.7458 | 0.1058 | -0.7948 | 0.0709 |
| OLIGO_06722 | AW463716 | ZFYVE21   | 0.085   | 0.8123 | 0.2843  | 0.4078 |
| OLIGO_08532 | AW463718 | C20orf27  | 0.1444  | 0.7576 | -0.1618 | 0.7237 |
| OLIGO_03781 | AW463722 | CBLC      | -0.8002 | 0.4192 | -0.3995 | 0.6781 |
| OLIGO_09092 | AW463727 | RPL7L1    | 0.6489  | 0.2712 | 0.4756  | 0.4001 |
| OLIGO_08534 | AW463730 | TREX1     | -0.2817 | 0.3785 | -0.3606 | 0.2786 |
| OLIGO_11761 | AW463734 | DLX1      | -0.2921 | 0.3621 | -0.2543 | 0.4051 |
| OLIGO_07407 | AW463737 | XYLT2     | 0.8076  | 0.0689 | 0.0806  | 0.8495 |
| OLIGO_03783 | AW463739 | LSM14A    | 0.1515  | 0.664  | 0.1312  | 0.6949 |
| OLIGO_06847 | AW463740 | USP11     | 0.3989  | 0.299  | 0.2229  | 0.5448 |
| OLIGO_03784 | AW463747 | HIBCH     | -0.88   | 0.0896 | -0.3711 | 0.4005 |
| OLIGO_00395 | AW463755 | ATP6V0D1  | 0.0374  | 0.907  | 0.2275  | 0.4611 |
| OLIGO_10961 | AW463757 | DOCK9     | 0.5281  | 0.169  | 0.1459  | 0.7015 |
| OLIGO_06829 | AW463762 | COL5A2    | -3.2088 | 0      | -1.6825 | 0.0068 |
| OLIGO_03785 | AW463764 | C20orf30  | 0.743   | 0.0035 | 0.4353  | 0.0738 |
| OLIGO_08052 | AW463765 | ADAR      | -1.3857 | 0.11   | -0.6117 | 0.4787 |
| OLIGO_09171 | AW463774 | ACADVL    | -0.0286 | 0.9224 | -0.0395 | 0.8883 |
| OLIGO_09240 | AW463777 | Zfp36l2   | 0.9497  | 0.0009 | 0.6078  | 0.0264 |
| OLIGO_06542 | AW463778 | PRPS1     | 1.2292  | 0.0357 | 0.8085  | 0.115  |
| OLIGO_03786 | AW463779 | SIRT7     | 0.4279  | 0.1122 | 0.1101  | 0.6697 |
| OLIGO_03787 | AW463780 | SLC35B2   | 0.3757  | 0.304  | 0.2044  | 0.5596 |
| OLIGO_07128 | AW463787 | SERTAD3   | 2.6896  | 0      | 1.033   | 0.1048 |
| OLIGO_07701 | AW463788 | LRP16     | -0.1497 | 0.7171 | -0.3802 | 0.3374 |
| OLIGO_09477 | AW463790 | LOC618128 | -0.4763 | 0.6263 | 0.0014  | 0.9988 |
| OLIGO_03788 | AW463791 | SLC41A3   | -0.0336 | 0.9307 | 0.1208  | 0.7507 |
| OLIGO_08051 | AW463798 | PSMA6     | 0.5292  | 0.294  | 0.1391  | 0.7726 |
| OLIGO_08542 | AW463800 | NBR1      | -0.1946 | 0.6398 | 0.0808  | 0.8395 |
| OLIGO_09887 | AW463803 | SOLH      | 0.5638  | 0.2301 | 0.0469  | 0.9173 |
| OLIGO_09731 | AW463804 | ZWILCH    | 0.0578  | 0.862  | 0.1528  | 0.6412 |
| OLIGO_03789 | AW463807 | EPS15L1   | 0.004   | 0.9949 | -0.194  | 0.7508 |
| OLIGO_09806 | AW463810 | C14orf11  | 0.094   | 0.7755 | 0.2113  | 0.5275 |
| OLIGO_07162 | AW463812 | CAT       | -0.024  | 0.9178 | 0.0006  | 0.9978 |

|             |          |           |         |        |         |        |
|-------------|----------|-----------|---------|--------|---------|--------|
| OLIGO_08544 | AW463813 | LOC509687 | -1.0912 | 0.0299 | -0.1499 | 0.7551 |
| OLIGO_08530 | AW463814 | C17orf25  | -0.2257 | 0.3804 | 0.1423  | 0.562  |
| OLIGO_11157 | AW463816 | C8orf36   | 0.4154  | 0.1559 | 0.1675  | 0.5487 |
| OLIGO_11259 | AW463818 | LOC51035  | 0.5336  | 0.2372 | 0.3973  | 0.3586 |
| OLIGO_08545 | AW463819 | ZDHHC4    | -0.3793 | 0.2195 | -0.4309 | 0.1459 |
| OLIGO_09758 | AW463827 | C11orf71  | -0.2159 | 0.5008 | -0.0346 | 0.9112 |
| OLIGO_07777 | AW463830 | DCTN1     | -0.5461 | 0.0782 | 0.0883  | 0.7655 |
| OLIGO_05910 | AW463831 | LOC532327 | 0.1061  | 0.6892 | -0.0101 | 0.9682 |
| OLIGO_08546 | AW463832 | FOSB      | 0.3177  | 0.2369 | -0.0134 | 0.9584 |
| OLIGO_08820 | AW463838 | LOC124446 | 0.285   | 0.418  | -0.398  | 0.2377 |
| OLIGO_11388 | AW463843 | LMAN2     | -1.1258 | 0.1536 | -0.6105 | 0.4145 |
| OLIGO_10365 | AW463844 | MGST2     | 0.379   | 0.697  | 0.1774  | 0.8515 |
| OLIGO_04188 | AW463845 | TOR1B     | -0.004  | 0.9874 | 0.0183  | 0.9403 |
| OLIGO_05970 | AW463849 | RBM22     | 0.1956  | 0.5591 | 0.3096  | 0.3596 |
| OLIGO_05918 | AW463852 | GIT1      | 0.6911  | 0.0156 | 0.1967  | 0.4716 |
| OLIGO_08674 | AW463856 | ERGIC3    | -0.0436 | 0.8714 | -0.0272 | 0.9159 |
| OLIGO_05927 | AW463862 | ROGDI     | 0.0026  | 0.9936 | 0.0806  | 0.7944 |
| OLIGO_05964 | AW463876 | RNF122    | 0.3965  | 0.0533 | 0.1773  | 0.3663 |
| OLIGO_05943 | AW463885 | SERPINB9  | -1.0027 | 0.0395 | -0.9397 | 0.0391 |
| OLIGO_05965 | AW463888 | FARS2     | -0.2442 | 0.4288 | -0.0406 | 0.8907 |
| OLIGO_08550 | AW463889 | ADAMTSL5  | -0.0942 | 0.7659 | -0.0096 | 0.9748 |
| OLIGO_03791 | AW463892 | GNPDA2    | 0.4396  | 0.288  | 0.0264  | 0.9431 |
| OLIGO_02292 | AW463893 | PTDSR     | -0.404  | 0.2416 | -0.089  | 0.7879 |
| OLIGO_08246 | AW463894 | NDUFC2    | 0.7127  | 0.1392 | 0.6356  | 0.169  |
| OLIGO_08293 | AW463895 | NOL7      | -0.2439 | 0.6472 | 0.5298  | 0.3356 |
| OLIGO_07057 | AW463898 | HSP90B1   | -0.0911 | 0.7486 | -0.168  | 0.5378 |
| OLIGO_03793 | AW463908 | ZNF512    | 0.1953  | 0.5594 | 0.2342  | 0.4655 |
| OLIGO_08259 | AW463910 | DDX6      | 0.5989  | 0.1685 | -0.0117 | 0.9738 |
| OLIGO_03794 | AW463916 | UBE2Q2    | -0.4215 | 0.2644 | 0.2705  | 0.4534 |
| OLIGO_05950 | AW463918 | GRN       | -0.4458 | 0.2505 | -0.3408 | 0.3592 |
| OLIGO_07562 | AW463924 | NDUFA4L2  | -0.8184 | 0.1916 | -0.4649 | 0.4364 |
| OLIGO_00910 | AW463932 | ELOVL1    | 0.1792  | 0.689  | 0.4272  | 0.32   |
| OLIGO_07001 | AW463933 | AES       | 0.0957  | 0.773  | -0.1234 | 0.6982 |
| OLIGO_05925 | AW463938 | RPS19BP1  | 0.364   | 0.2086 | 0.7714  | 0.0058 |
| OLIGO_05914 | AW463942 | PHYHD1    | 0.2588  | 0.6071 | 0.3374  | 0.4867 |
| OLIGO_03795 | AW463943 | TPCN2     | -0.1832 | 0.6683 | 0.1361  | 0.7399 |
| OLIGO_08551 | AW463944 | KLC4      | -0.3558 | 0.3408 | -0.5407 | 0.1313 |
| OLIGO_08552 | AW463945 | GABARAPL2 | 0.8348  | 0.0874 | 0.7621  | 0.1085 |
| OLIGO_05936 | AW463946 | FGD4      | 0.4006  | 0.3513 | 0.4765  | 0.2477 |
| OLIGO_05953 | AW463947 | OSTF1     | 0.5589  | 0.2521 | 0.7529  | 0.1399 |
| OLIGO_05960 | AW463948 | STAMPB    | 0.1118  | 0.6427 | -0.1034 | 0.6545 |
| OLIGO_00261 | AW463949 | TATDN1    | -0.8837 | 0.2255 | -0.4272 | 0.5428 |
| OLIGO_08553 | AW463950 | C1orf128  | 0.1824  | 0.49   | 0.1474  | 0.5608 |
| OLIGO_06748 | AW463952 | DNAJC10   | -0.2373 | 0.438  | -0.0262 | 0.9282 |
| OLIGO_01921 | AW463960 | COL12A1   | -2.6193 | 0.0011 | -0.6459 | 0.4002 |
| OLIGO_03796 | AW463968 | CYFIP2    | -0.7572 | 0.2698 | -0.4041 | 0.5301 |
| OLIGO_05954 | AW463974 | HHAT      | -0.2644 | 0.3279 | -0.2636 | 0.3089 |
| OLIGO_02729 | AW463984 | HERPUD1   | -0.1074 | 0.8422 | -0.2875 | 0.5786 |
| OLIGO_00610 | AW463985 | NOLA1     | -0.4308 | 0.2059 | 0.1435  | 0.6576 |
| OLIGO_05962 | AW463986 | LOC222699 | 0.2131  | 0.5508 | -0.3999 | 0.2432 |
| OLIGO_05969 | AW463987 | FIBP      | -0.1779 | 0.6077 | -0.0354 | 0.9151 |
| OLIGO_08755 | AW463988 | SPA17     | 0.3044  | 0.4683 | 0.252   | 0.5387 |
| OLIGO_05948 | AW464001 | PAR3      | 0.7671  | 0.0257 | -0.0076 | 0.9815 |
| OLIGO_05956 | AW464002 | MRPL22    | -0.0558 | 0.8596 | 0.2051  | 0.4962 |
| OLIGO_06931 | AW464007 | PRR13     | -0.8872 | 0.0567 | -0.4382 | 0.3256 |

|             |          |           |         |        |         |        |
|-------------|----------|-----------|---------|--------|---------|--------|
| OLIGO_05941 | AW464009 | MED28     | 0.6293  | 0.0283 | 0.1735  | 0.5271 |
| OLIGO_11212 | AW464011 | UCKL1     | 0.2226  | 0.4337 | 0.0058  | 0.983  |
| OLIGO_02798 | AW464012 | MARCKSL1  | -0.6581 | 0.1968 | -0.3385 | 0.4877 |
| OLIGO_05973 | AW464013 | LOC162427 | -0.0386 | 0.9079 | 0.2337  | 0.488  |
| OLIGO_05978 | AW464015 | DHDDS     | 0.2117  | 0.4876 | 0.113   | 0.6992 |
| OLIGO_05919 | AW464016 | SAPS1     | 0.208   | 0.2962 | -0.0088 | 0.9629 |
| OLIGO_05938 | AW464019 | NUDT19    | -0.4469 | 0.5647 | -0.2868 | 0.6998 |
| OLIGO_09013 | AW464021 | RYK       | 0.2128  | 0.5679 | -0.3899 | 0.2751 |
| OLIGO_11703 | AW464026 | CANT1     | -0.6702 | 0.0371 | 0.0329  | 0.9152 |
| OLIGO_05920 | AW464027 | CENPB     | -0.14   | 0.6899 | -0.4614 | 0.1706 |
| OLIGO_08556 | AW464030 | MX1       | 0.2584  | 0.6614 | 0.19    | 0.7369 |
| OLIGO_05944 | AW464031 | LPIN3     | -0.8053 | 0.0382 | -0.0825 | 0.8228 |
| OLIGO_05974 | AW464035 | COMMD4    | 0.0222  | 0.9383 | 0.3669  | 0.1772 |
| OLIGO_09174 | AW464038 | PRKAG2    | 0.632   | 0.0794 | 0.4405  | 0.2003 |
| OLIGO_08557 | AW464044 | RAB33A    | 0.2584  | 0.6081 | 0.2639  | 0.585  |
| OLIGO_11041 | AW464049 | PLEKHA1   | -0.0593 | 0.9086 | 0.1456  | 0.7719 |
| OLIGO_05958 | AW464052 | PPP1R12A  | -0.2675 | 0.6368 | 0.0852  | 0.8771 |
| OLIGO_10794 | AW464053 | PRL       | -0.6774 | 0.2098 | -0.5187 | 0.3163 |
| OLIGO_03799 | AW464057 | CFLAR     | -0.5335 | 0.2557 | 0.0184  | 0.9673 |
| OLIGO_10570 | AW464060 | RPL12     | 1.1313  | 0.0355 | 0.5184  | 0.314  |
| OLIGO_05946 | AW464062 | MRPL45    | 0.1603  | 0.6254 | -0.3524 | 0.2721 |
| OLIGO_11466 | AW464067 | BRD1      | 0.1898  | 0.3957 | 0.2871  | 0.1781 |
| OLIGO_11049 | AW464068 | POLR2E    | 0.2549  | 0.4022 | 0.0513  | 0.8596 |
| OLIGO_01257 | AW464069 | BMSC-MCP  | 0.3319  | 0.204  | -0.2966 | 0.2344 |
| OLIGO_07881 | AW464074 | SNRPD3    | -0.1612 | 0.5939 | 0.119   | 0.6806 |
| OLIGO_09305 | AW464075 | SELS      | 0.0873  | 0.7837 | -0.2554 | 0.4024 |
| OLIGO_05952 | AW464080 | PER2      | 0.2651  | 0.3173 | 0.0799  | 0.7528 |
| OLIGO_08416 | AW464089 | TMEM127   | 0.3643  | 0.6156 | 0.1789  | 0.7971 |
| OLIGO_12370 | AW464095 | ACTR3     | 0.4936  | 0.296  | 0.2462  | 0.5864 |
| OLIGO_05926 | AW464100 | TMEM41B   | 1.0729  | 0.0213 | 0.9803  | 0.0313 |
| OLIGO_10361 | AW464101 | CHRM2     | 1.0626  | 0.2322 | 0.5409  | 0.5257 |
| OLIGO_09328 | AW464103 | C14orf172 | 0.2009  | 0.4983 | 0.0499  | 0.8598 |
| OLIGO_08965 | AW464106 | E4F1      | -0.2854 | 0.4116 | -0.3938 | 0.2375 |
| OLIGO_05915 | AW464108 | GGTLA1    | 0.4061  | 0.4261 | 0.664   | 0.1751 |
| OLIGO_05961 | AW464116 | LENG1     | -0.3605 | 0.4139 | -0.484  | 0.2528 |
| OLIGO_03802 | AW464118 | DUSP3     | 1.061   | 0.013  | 0.599   | 0.1395 |
| OLIGO_07150 | AW464121 | ATP6V1E1  | 0.6446  | 0.1982 | 1.0711  | 0.026  |
| OLIGO_05955 | AW464125 | DENND1A   | -0.5897 | 0.2933 | -0.0126 | 0.9789 |
| OLIGO_05917 | AW464128 | VDP       | -0.0457 | 0.9026 | -0.1547 | 0.6742 |
| OLIGO_05937 | AW464133 | HAT1      | -0.0029 | 0.9934 | 0.4617  | 0.1814 |
| OLIGO_05947 | AW464135 | CYCS      | 0.7757  | 0.0191 | 0.228   | 0.4692 |
| OLIGO_10063 | AW464141 | RCP9      | -0.1017 | 0.8588 | -0.6261 | 0.2674 |
| OLIGO_03803 | AW464145 | LOC645781 | -0.0443 | 0.949  | 0.1152  | 0.8622 |
| OLIGO_06024 | AW464149 | FBNP1L    | -0.5004 | 0.1903 | -0.3068 | 0.4011 |
| OLIGO_11178 | AW464151 | MLLT10    | 0.0323  | 0.9401 | 0.0474  | 0.9096 |
| OLIGO_09961 | AW464152 | GALNT6    | -0.3681 | 0.6018 | -0.158  | 0.8122 |
| OLIGO_05982 | AW464154 | PDIA3     | 0.005   | 0.9939 | 0.2176  | 0.7278 |
| OLIGO_03804 | AW464155 | SMARCAL1  | -0.5843 | 0.2717 | -0.2413 | 0.6356 |
| OLIGO_06025 | AW464161 | COPS4     | -0.0571 | 0.8726 | 0.5686  | 0.0951 |
| OLIGO_07037 | AW464165 | BAT1      | -0.2319 | 0.484  | 0.2095  | 0.5095 |
| OLIGO_08778 | AW464166 | HIST1H1D  | -1.0076 | 0.0101 | -0.1626 | 0.6654 |
| OLIGO_07246 | AW464174 | DDX21     | 0.0249  | 0.9456 | 0.4084  | 0.2734 |
| OLIGO_07052 | AW464185 | GNAI1     | -0.8953 | 0.0085 | -0.286  | 0.378  |
| OLIGO_06003 | AW464194 | PAN3      | 0.5503  | 0.1167 | 0.2205  | 0.5112 |
| OLIGO_06014 | AW464195 | FSTL3     | 2.1863  | 0.0005 | 1.4368  | 0.0174 |



|             |          |           |         |        |         |        |
|-------------|----------|-----------|---------|--------|---------|--------|
| OLIGO_03806 | AW464202 | PPP3CC    | 0.2467  | 0.4653 | 0.6094  | 0.0603 |
| OLIGO_03807 | AW464204 | LOC653256 | 0.2901  | 0.3179 | 0.4891  | 0.0794 |
| OLIGO_06015 | AW464206 | MOBKL1A   | 0.4524  | 0.2154 | -0.0473 | 0.8914 |
| OLIGO_09993 | AW464210 | DPP4      | -1.5728 | 0.0125 | -0.8862 | 0.1431 |
| OLIGO_05983 | AW464222 | MGC13017  | -0.2589 | 0.6257 | 0.2061  | 0.6855 |
| OLIGO_10921 | AW464223 | ATP5J     | -0.2041 | 0.3795 | -0.0444 | 0.8418 |
| OLIGO_05985 | AW464234 | BMP7      | -0.8883 | 0.0404 | -0.4221 | 0.3083 |
| OLIGO_09626 | AW464244 | SLC11A1   | -0.154  | 0.7543 | -0.3292 | 0.4854 |
| OLIGO_03810 | AW464245 | TOPBP1    | 0.809   | 0.1495 | 0.5862  | 0.2664 |
| OLIGO_05987 | AW464246 | LOC389895 | 0.0926  | 0.8825 | 0.0655  | 0.9145 |
| OLIGO_10007 | AW464253 | DUSP16    | 0.648   | 0.0362 | 0.3938  | 0.1827 |
| OLIGO_10908 | AW464255 | KIAA0265  | -0.5832 | 0.0438 | -0.3318 | 0.228  |
| OLIGO_11394 | AW464260 | PEPT1     | -1.5152 | 0.0327 | -0.4921 | 0.4674 |
| OLIGO_09931 | AW464263 | PPP1R13L  | 0.286   | 0.6677 | 0.1135  | 0.8603 |
| OLIGO_10013 | AW464264 | C1QTNF1   | 0.6331  | 0.0651 | 0.3259  | 0.3186 |
| OLIGO_10109 | AW464265 | STAU1     | 0.6962  | 0.3343 | 0.3942  | 0.5685 |
| OLIGO_06734 | AW464268 | ACSL6     | -0.3166 | 0.6192 | 0.194   | 0.7507 |
| OLIGO_08314 | AW464292 | NDUFB5    | 0.2576  | 0.5498 | -0.1107 | 0.7912 |
| OLIGO_10194 | AW464294 | MTA2      | -0.3271 | 0.4357 | 0.0695  | 0.8635 |
| OLIGO_10039 | AW464298 | TNFRSF6B  | -0.1471 | 0.8721 | -0.0374 | 0.9669 |
| OLIGO_07222 | AW464300 | SLC11A2   | -0.908  | 0.0955 | -0.3209 | 0.4777 |
| OLIGO_05986 | AW464301 | TMEM138   | -0.0362 | 0.8937 | 0.0195  | 0.9402 |
| OLIGO_05993 | AW464303 | LOC654335 | 0.2711  | 0.5077 | 0.0984  | 0.8    |
| OLIGO_06030 | AW464306 | DRB1      | 0.5224  | 0.1221 | 0.2497  | 0.4405 |
| OLIGO_05356 | AW464307 | ATG12     | 1.123   | 0.0017 | 0.4293  | 0.2058 |
| OLIGO_05360 | AW464308 | AP2M1     | 1.2872  | 0.0658 | 0.5302  | 0.4285 |
| OLIGO_10048 | AW464309 | BCL2L1    | 0.2244  | 0.6794 | 0.3552  | 0.508  |
| OLIGO_08575 | AW464319 | FANCE     | -0.0871 | 0.7223 | -0.1096 | 0.6486 |
| OLIGO_09956 | AW464321 | SNX6      | 0.2514  | 0.3566 | 0.4998  | 0.0563 |
| OLIGO_03815 | AW464330 | ARF5      | 0.7785  | 0.083  | 0.2563  | 0.551  |
| OLIGO_11395 | AW464334 | GPBP1L1   | 0.1565  | 0.6356 | 0.4768  | 0.1327 |
| OLIGO_10375 | AW464338 | PGRMC2    | 0.1218  | 0.7644 | 0.7076  | 0.0713 |
| OLIGO_06011 | AW464349 | GDI2      | 0.5705  | 0.2073 | 0.5063  | 0.2431 |
| OLIGO_03818 | AW464350 | FLJ11795  | -0.1675 | 0.7957 | -0.2097 | 0.7409 |
| OLIGO_08306 | AW464352 | ID2       | 0.2378  | 0.5499 | 0.372   | 0.3294 |
| OLIGO_09974 | AW464353 | FBXO32    | 1.2278  | 0.0457 | 0.3585  | 0.5575 |
| OLIGO_06837 | AW464354 | RPL10     | 0.3125  | 0.5552 | 0.2624  | 0.6053 |
| OLIGO_09971 | AW464356 | IMP3      | 0.3338  | 0.3377 | -0.1749 | 0.5855 |
| OLIGO_06013 | AW464359 | AAK1      | -0.6184 | 0.1834 | -0.1733 | 0.6972 |
| OLIGO_09981 | AW464363 | NAGK      | 0.5451  | 0.44   | -0.2662 | 0.694  |
| OLIGO_09194 | AW464366 | VGLL1     | -0.5448 | 0.1359 | -0.0196 | 0.955  |
| OLIGO_08577 | AW464367 | GJB5      | -0.3406 | 0.6142 | -0.1682 | 0.7984 |
| OLIGO_06004 | AW464370 | PPP1R9B   | 1.2087  | 0.0003 | 0.6112  | 0.0526 |
| OLIGO_11159 | AW464375 | C6orf75   | -0.2172 | 0.6054 | -0.3527 | 0.4058 |
| OLIGO_08579 | AW464382 | DIABLO    | -0.1031 | 0.8087 | -0.1039 | 0.7992 |
| OLIGO_09995 | AW464384 | ZNF395    | 1.6463  | 0.013  | 0.0565  | 0.9292 |
| OLIGO_08012 | AW464387 | WDR13     | 0.306   | 0.3538 | 0.0642  | 0.8382 |
| OLIGO_10477 | AW464389 | PRDX4     | 0.685   | 0.2358 | 0.6851  | 0.2162 |
| OLIGO_08580 | AW464390 | PXMP4     | -0.3895 | 0.415  | 0.028   | 0.9507 |
| OLIGO_03819 | AW464391 | PDCD7     | 0.2064  | 0.592  | 0.548   | 0.1382 |
| OLIGO_08581 | AW464393 | YKT6      | 0.0319  | 0.895  | 0.0678  | 0.7694 |
| OLIGO_09996 | AW464396 | TMCC1     | 0.2614  | 0.5395 | -0.1026 | 0.8017 |
| OLIGO_03820 | AW464398 | DSC2      | -1.2261 | 0.0667 | -0.225  | 0.6872 |
| OLIGO_03821 | AW464399 | C13orf24  | -0.4374 | 0.4686 | -0.5859 | 0.3095 |
| OLIGO_03822 | AW464400 | Lrrfip1   | 0.5693  | 0.338  | 0.3278  | 0.5649 |

|             |          |           |         |        |         |        |
|-------------|----------|-----------|---------|--------|---------|--------|
| OLIGO_06026 | AW464404 | PFDN6     | -0.0584 | 0.8339 | 0.0695  | 0.7947 |
| OLIGO_08155 | AW464405 | GLRX      | -0.6133 | 0.1682 | -0.6778 | 0.1104 |
| OLIGO_10629 | AW464408 | YWHAQ     | -0.3834 | 0.161  | 0.1204  | 0.6447 |
| OLIGO_11397 | AW464411 | NPDC1     | 0.5111  | 0.2798 | 0.4162  | 0.3586 |
| OLIGO_05996 | AW464413 | CCDC47    | 0.3885  | 0.2098 | 0.5964  | 0.0448 |
| OLIGO_06019 | AW464415 | BRRN1     | -0.322  | 0.3401 | 0.2749  | 0.3933 |
| OLIGO_10101 | AW464419 | C3orf60   | -0.1598 | 0.7681 | -0.1948 | 0.7078 |
| OLIGO_10819 | AW464420 | HIST1H1C  | -0.6074 | 0.242  | 0.1333  | 0.7887 |
| OLIGO_03159 | AW464423 | ASAH1     | 0.8698  | 0.1039 | 0.6867  | 0.1803 |
| OLIGO_08586 | AW464427 | SAE1      | 0.0242  | 0.9399 | -0.0635 | 0.8367 |
| OLIGO_05991 | AW464433 | GLT6D1    | -0.26   | 0.6126 | -0.0482 | 0.9215 |
| OLIGO_06021 | AW464436 | FNTA      | 0.2478  | 0.426  | 0.8264  | 0.0056 |
| OLIGO_10114 | AW464441 | SLC25A3   | -0.1258 | 0.7157 | 0.3846  | 0.2443 |
| OLIGO_10553 | AW464442 | COL3A1    | -3.1544 | 0.0124 | -1.5279 | 0.1756 |
| OLIGO_10566 | AW464444 | JOSD2     | -0.313  | 0.8103 | -0.2833 | 0.8261 |
| OLIGO_06005 | AW464447 | HMGCL     | -0.4307 | 0.2126 | -0.2062 | 0.5318 |
| OLIGO_06022 | AW464448 | COX7A2L   | 0.668   | 0.0376 | 1.005   | 0.0012 |
| OLIGO_06029 | AW464449 | RAB37     | 0.0866  | 0.8237 | -0.0491 | 0.8952 |
| OLIGO_01646 | AW464452 | PIGY      | 0.7084  | 0.2176 | 0.4317  | 0.4381 |
| OLIGO_09153 | AW464455 | MUC1      | -0.9267 | 0.1146 | -0.5277 | 0.3309 |
| OLIGO_05992 | AW464457 | TMEM14A   | -0.1181 | 0.6074 | -0.1585 | 0.4711 |
| OLIGO_07281 | AW464468 | FTHL7     | 0.2843  | 0.4018 | 0.1063  | 0.7412 |
| OLIGO_01512 | AW464469 | ZNF462    | -0.6741 | 0.1043 | -0.4357 | 0.2755 |
| OLIGO_00166 | AW464473 | UFD1L     | 0.7416  | 0.3677 | 0.2483  | 0.753  |
| OLIGO_10380 | AW464482 | SMOC1     | 0.3232  | 0.5426 | 0.5783  | 0.2562 |
| OLIGO_06010 | AW464491 | UPF2      | -0.2747 | 0.417  | -0.0663 | 0.8379 |
| OLIGO_00070 | AW464501 | HPRT1     | 0.6872  | 0.0702 | 0.596   | 0.0998 |
| OLIGO_08594 | AW464502 | SRPRB     | -0.4324 | 0.1944 | 0.3454  | 0.2783 |
| OLIGO_10978 | AW464507 | HECA      | 0.3385  | 0.2185 | 0.5047  | 0.0554 |
| OLIGO_10280 | AW464509 | EIF3S6    | 0.1854  | 0.6247 | 0.4045  | 0.2683 |
| OLIGO_10237 | AW464513 | CALML4    | 0.5358  | 0.0794 | 0.3154  | 0.2785 |
| OLIGO_08590 | AW464517 | LOC522854 | 0.4265  | 0.1135 | 0.1807  | 0.4838 |
| OLIGO_10223 | AW464522 | GPD1L     | 0.6199  | 0.0662 | 0.7082  | 0.0277 |
| OLIGO_10232 | AW464523 | C19orf42  | -0.2184 | 0.5731 | 0.5763  | 0.1575 |
| OLIGO_10598 | AW464527 | MARCKS    | -1.3533 | 0      | -0.5839 | 0.0657 |
| OLIGO_10278 | AW464530 | OCIAD1    | 0.6744  | 0.1282 | 0.5574  | 0.1855 |
| OLIGO_10224 | AW464532 | SYNGR2    | 0.6912  | 0.0288 | 0.4816  | 0.1109 |
| OLIGO_07153 | AW464540 | IGFBP6    | 1.146   | 0.0022 | 0.7218  | 0.044  |
| OLIGO_00369 | AW464544 | NDUFS6    | 0.0807  | 0.7595 | 0.3575  | 0.1545 |
| OLIGO_10244 | AW464546 | BPY2IP1   | -0.786  | 0.1917 | -0.0868 | 0.8769 |
| OLIGO_08591 | AW464548 | CTSK      | 0.1111  | 0.7818 | 0.2632  | 0.4924 |
| OLIGO_11521 | AW464549 | SEC22B    | -0.1008 | 0.8658 | -0.3432 | 0.5604 |
| OLIGO_08592 | AW464552 | BTBD10    | -0.4083 | 0.3619 | -0.3012 | 0.4829 |
| OLIGO_08941 | AW464555 | SCPEP1    | -1.3317 | 0.0235 | -0.3809 | 0.498  |
| OLIGO_10246 | AW464557 | ARPC1A    | 0.069   | 0.7365 | 0.2442  | 0.2122 |
| OLIGO_08593 | AW464561 | PIK3C2G   | -1.7612 | 0.1345 | -0.6084 | 0.5244 |
| OLIGO_10217 | AW464562 | HRH1      | -0.5563 | 0.277  | -0.5091 | 0.2994 |
| OLIGO_11410 | AW464563 | MRPL17    | 0.1257  | 0.6299 | 0.1024  | 0.6849 |
| OLIGO_10257 | AW464567 | Samd12    | 0.2254  | 0.6797 | -0.1034 | 0.8465 |
| OLIGO_03824 | AW464568 | PIAS3     | -0.5629 | 0.1669 | -0.2054 | 0.6022 |
| OLIGO_03077 | AW464570 | AMZ2      | 0.4426  | 0.2846 | 0.0492  | 0.9012 |
| OLIGO_10226 | AW464575 | FAF1      | 0.1465  | 0.5918 | -0.0509 | 0.8456 |
| OLIGO_10754 | AW464582 | C17orf80  | -0.3659 | 0.2626 | -0.2385 | 0.4562 |
| OLIGO_10239 | AW464586 | JMJD1B    | -0.2264 | 0.5817 | -0.0373 | 0.9246 |
| OLIGO_09349 | AW464609 | TM2D2     | -0.2306 | 0.3666 | 0.2433  | 0.3206 |

|             |          |           |         |        |         |        |
|-------------|----------|-----------|---------|--------|---------|--------|
| OLIGO_08476 | AW464610 | C11orf52  | -0.2486 | 0.7549 | -0.2179 | 0.78   |
| OLIGO_06746 | AW464614 | PFKL      | 0.0174  | 0.9741 | 0.11    | 0.8307 |
| OLIGO_11523 | AW464619 | MYBPC2    | 0.2198  | 0.7439 | -0.4819 | 0.4724 |
| OLIGO_10219 | AW464623 | CBFA2T2   | -0.5463 | 0.0936 | -0.4172 | 0.1815 |
| OLIGO_07056 | AW464635 | ATP6V1G1  | 0.4516  | 0.2785 | 0.4769  | 0.2327 |
| OLIGO_10250 | AW464639 | ZDHHC6    | 0.4374  | 0.1727 | 0.2319  | 0.4506 |
| OLIGO_10212 | AW464642 | DNMT3B    | -0.6962 | 0.1906 | -0.415  | 0.4156 |
| OLIGO_10282 | AW464646 | FAM82B    | -0.5916 | 0.0935 | 0.0553  | 0.8697 |
| OLIGO_11063 | AW464647 | HIP2      | -0.0306 | 0.9336 | -0.296  | 0.3992 |
| OLIGO_10251 | AW464650 | PLXNA3    | 0.4482  | 0.2217 | -0.4502 | 0.2266 |
| OLIGO_05722 | AW464652 | PAK2      | 1.0449  | 0.0153 | 0.8754  | 0.0339 |
| OLIGO_10220 | AW464656 | FGFR2     | -0.2728 | 0.5401 | 0.0228  | 0.9574 |
| OLIGO_10143 | AW464657 | LOC651252 | -0.4675 | 0.4649 | -0.417  | 0.4901 |
| OLIGO_10682 | AW464664 | ACTN4     | 0.268   | 0.4468 | 0.5224  | 0.1221 |
| OLIGO_11289 | AW464668 | TACSTD2   | -1.9462 | 0.011  | -0.1173 | 0.8717 |
| OLIGO_10221 | AW464669 | FAM109A   | -0.6032 | 0.1191 | -0.4198 | 0.2553 |
| OLIGO_10236 | AW464671 | HAX1      | -0.0783 | 0.8451 | 0.1353  | 0.7242 |
| OLIGO_06528 | AW464672 | QSCN6     | 0.0425  | 0.9405 | -0.031  | 0.9547 |
| OLIGO_10155 | AW464676 | PPP1CC    | 0.74    | 0.0638 | -0.0502 | 0.8975 |
| OLIGO_10222 | AW464681 | COPS5     | 0.0397  | 0.8848 | 0.3604  | 0.1693 |
| OLIGO_10215 | AW464690 | LAP3      | -0.4666 | 0.1798 | 0.0564  | 0.8653 |
| OLIGO_10243 | AW464694 | SLC25A20  | 0.1143  | 0.8141 | -0.083  | 0.8587 |
| OLIGO_10255 | AW464695 | COPS8     | 0.3246  | 0.4329 | -0.1408 | 0.7278 |
| OLIGO_09088 | AW464696 | PALLD     | 0.3811  | 0.3365 | 0.3859  | 0.3102 |
| OLIGO_08599 | AW464700 | GCN5L2    | -0.0107 | 0.9702 | -0.4591 | 0.0925 |
| OLIGO_10216 | AW464701 | USF2      | 0.3879  | 0.0677 | 0.2371  | 0.2431 |
| OLIGO_10225 | AW464702 | HOMER3    | -0.3713 | 0.6091 | -0.2454 | 0.7288 |
| OLIGO_06868 | AW464712 | VDAC3     | -0.777  | 0.0538 | -0.3286 | 0.3942 |
| OLIGO_08182 | AW464715 | DAZAP2    | 1.4188  | 0.0002 | 1.1057  | 0.0027 |
| OLIGO_10245 | AW464717 | LOC618479 | 1.1706  | 0.0206 | 1.1846  | 0.0146 |
| OLIGO_10256 | AW464718 | MNAT1     | 0.1957  | 0.6088 | 0.094   | 0.7975 |
| OLIGO_10263 | AW464719 | PFAAP5    | -0.4914 | 0.2686 | -0.3992 | 0.3488 |
| OLIGO_08425 | AW464722 | CALML5    | -0.3635 | 0.4207 | -0.1285 | 0.7665 |
| OLIGO_08948 | AW464726 | GCGR      | 0.1583  | 0.7997 | 0.2492  | 0.6862 |
| OLIGO_10565 | AW464728 | MKRN2     | -1.3044 | 0.095  | -0.8801 | 0.2395 |
| OLIGO_08987 | AW464734 | BZW2      | -0.068  | 0.8378 | 0.3975  | 0.211  |
| OLIGO_10861 | AW464737 | C20orf55  | -0.8178 | 0.204  | -0.7873 | 0.2124 |
| OLIGO_10264 | AW464741 | TSC22D1   | -0.2597 | 0.6291 | 0.0099  | 0.9848 |
| OLIGO_08568 | AW464744 | Sdc4      | 1.0523  | 0.0801 | 0.9758  | 0.0905 |
| OLIGO_10757 | AW464746 | CCT3      | 0.5998  | 0.0586 | 0.1078  | 0.7225 |
| OLIGO_08602 | AW464749 | PPIC      | 0.6455  | 0.3763 | -0.0138 | 0.9842 |
| OLIGO_10258 | AW464751 | NCDN      | 1.1181  | 0.0017 | 0.1035  | 0.7593 |
| OLIGO_10266 | AW464752 | SFT2D3    | -0.0375 | 0.9113 | -0.023  | 0.9429 |
| OLIGO_10273 | AW464753 | SLC20A2   | -0.4068 | 0.3935 | -0.2356 | 0.6079 |
| OLIGO_11514 | AW464756 | TEAD3     | 0.0614  | 0.8754 | 0.1218  | 0.7455 |
| OLIGO_10033 | AW464763 | MRPL27    | -0.1509 | 0.4185 | 0.0569  | 0.7497 |
| OLIGO_10821 | AW464765 | ICAM2     | 0.2318  | 0.5968 | 0.2777  | 0.5129 |
| OLIGO_10279 | AW464767 | SLC35F5   | -0.6176 | 0.1593 | -0.1077 | 0.7987 |
| OLIGO_10627 | AW464770 | MGC133898 | 0.6855  | 0.3332 | 0.7254  | 0.2856 |
| OLIGO_10277 | AW464776 | TXN2      | -0.5417 | 0.0795 | -0.1579 | 0.5915 |
| OLIGO_08604 | AW464777 | ANKRD16   | -0.9064 | 0.0178 | -0.73   | 0.0457 |
| OLIGO_10228 | AW464779 | MGC22793  | 0.0032  | 0.9935 | 0.1244  | 0.7426 |
| OLIGO_10775 | AW464781 | TADA2L    | 0.0187  | 0.9534 | 0.1322  | 0.6657 |
| OLIGO_03830 | AW464787 | Clcn3     | -0.0702 | 0.8386 | 0.5527  | 0.0947 |
| OLIGO_10240 | AW464792 | C2orf4    | 0.7903  | 0.5577 | 0.3462  | 0.7867 |

|             |          |           |         |        |         |        |
|-------------|----------|-----------|---------|--------|---------|--------|
| OLIGO_10259 | AW464794 | CRSP8     | 0.1822  | 0.714  | -0.1863 | 0.7037 |
| OLIGO_10234 | AW464801 | ZNRD1     | -0.0482 | 0.8697 | 0.2349  | 0.4264 |
| OLIGO_10268 | AW464805 | PDE2A     | 0.16    | 0.696  | -0.2149 | 0.5842 |
| OLIGO_10619 | AW464809 | RER1      | -0.4667 | 0.4116 | -0.0902 | 0.869  |
| OLIGO_10230 | AW464812 | RFC2      | 0.8007  | 0.0658 | 0.2536  | 0.5426 |
| OLIGO_08957 | AW464816 | C12orf49  | -0.2532 | 0.4394 | -0.0788 | 0.8017 |
| OLIGO_10269 | AW464817 | ZNF235    | -0.6328 | 0.2395 | -0.5359 | 0.3011 |
| OLIGO_08536 | AW464818 | ANKRD1    | 1.0071  | 0.0283 | 0.1396  | 0.7506 |
| OLIGO_06815 | AW464821 | EXT1      | 0.888   | 0.0144 | 0.1934  | 0.5772 |
| OLIGO_10231 | AW464822 | PPP4R1    | -0.1649 | 0.6532 | 0.3166  | 0.3695 |
| OLIGO_11455 | AW464825 | TRIM37    | 0.1275  | 0.747  | -0.1247 | 0.7422 |
| OLIGO_08885 | AW464826 | C19orf10  | -0.3289 | 0.2979 | 0.0017  | 0.9954 |
| OLIGO_10213 | AW464828 | C14orf119 | -0.4482 | 0.0701 | -0.1565 | 0.5089 |
| OLIGO_07198 | AW464829 | HDAC2     | -0.1308 | 0.7424 | -0.3898 | 0.3064 |
| OLIGO_01590 | AW464831 | TPR       | -0.7149 | 0.0506 | 0.1765  | 0.6141 |
| OLIGO_10270 | AW464836 | PSMD5     | 0.81    | 0.0322 | -0.124  | 0.7317 |
| OLIGO_06047 | AW464839 | FLJ34077  | -0.7004 | 0.3165 | -0.4361 | 0.5195 |
| OLIGO_10301 | AW464843 | LOC401152 | 0.7424  | 0.0203 | 0.4312  | 0.1591 |
| OLIGO_10305 | AW464844 | BPHL      | -0.5932 | 0.2721 | -0.0128 | 0.9803 |
| OLIGO_10799 | AW464845 | GNB1      | 0.0593  | 0.8827 | 0.2433  | 0.5278 |
| OLIGO_05894 | AW464846 | ZNF198    | -0.0383 | 0.8928 | 0.4175  | 0.1255 |
| OLIGO_10290 | AW464854 | HARSL     | 0.2551  | 0.5144 | 0.0113  | 0.976  |
| OLIGO_03833 | AW464855 | SLC36A2   | -0.1259 | 0.8031 | -0.3085 | 0.526  |
| OLIGO_07408 | AW464856 | H2AFV     | 0.5859  | 0.1746 | 0.404   | 0.3183 |
| OLIGO_11107 | AW464859 | C10orf30  | -0.356  | 0.5427 | -0.4483 | 0.4241 |
| OLIGO_05896 | AW464866 | LTA4H     | 0.6257  | 0.0964 | 0.213   | 0.5509 |
| OLIGO_01490 | AW464867 | MYO9B     | -0.4665 | 0.174  | -0.1664 | 0.6144 |
| OLIGO_03834 | AW464871 | RHOB      | 0.9395  | 0.0061 | 0.4007  | 0.2212 |
| OLIGO_06033 | AW464878 | SLC26A2   | -0.8274 | 0.087  | -0.2534 | 0.5829 |
| OLIGO_06058 | AW464880 | RFP       | 0.1881  | 0.6586 | -0.1487 | 0.7168 |
| OLIGO_06065 | AW464881 | PHF5A     | -0.1006 | 0.8259 | 0.2217  | 0.6236 |
| OLIGO_10307 | AW464883 | THOC6     | 0.0437  | 0.8614 | 0.0836  | 0.7259 |
| OLIGO_10308 | AW464895 | PCID1     | 0.0748  | 0.7935 | 0.1862  | 0.497  |
| OLIGO_10595 | AW464896 | FKBP2     | -0.1377 | 0.7271 | -0.0905 | 0.8109 |
| OLIGO_06059 | AW464903 | SLCO2B1   | 0.0971  | 0.8438 | 0.0376  | 0.9375 |
| OLIGO_10309 | AW464905 | TTF1      | 0.1944  | 0.653  | -0.0429 | 0.9174 |
| OLIGO_05900 | AW464907 | RAB14     | -0.0056 | 0.9845 | 0.4118  | 0.132  |
| OLIGO_06035 | AW464909 | BUD31     | 0.2455  | 0.5896 | -0.3077 | 0.4899 |
| OLIGO_09244 | AW464913 | COMMD5    | -0.8419 | 0.1068 | -0.4486 | 0.3697 |
| OLIGO_06066 | AW464914 | TMCC3     | 0.238   | 0.5709 | -0.0882 | 0.8264 |
| OLIGO_10294 | AW464915 | USP2      | -0.1064 | 0.7912 | -0.031  | 0.9374 |
| OLIGO_03835 | AW464916 | ANKRD47   | -0.4724 | 0.12   | -0.5377 | 0.065  |
| OLIGO_06036 | AW464919 | EMR3      | 0.1661  | 0.8232 | 0.0942  | 0.8938 |
| OLIGO_08652 | AW464924 | LOC93343  | 0.011   | 0.9733 | -0.1247 | 0.6913 |
| OLIGO_03838 | AW464927 | WDR26     | -0.5293 | 0.2923 | -0.0277 | 0.9541 |
| OLIGO_06042 | AW464930 | Etv3      | -0.3013 | 0.629  | -0.6059 | 0.3229 |
| OLIGO_10312 | AW464936 | AFAP      | -0.7731 | 0.1394 | -0.2501 | 0.6148 |
| OLIGO_05901 | AW464938 | ENTPD4    | -0.0099 | 0.982  | 0.2671  | 0.5261 |
| OLIGO_11400 | AW464940 | FETUB     | 1.0101  | 0.0186 | 0.8327  | 0.0428 |
| OLIGO_06043 | AW464941 | PIAS1     | 0.3439  | 0.337  | -0.2388 | 0.4935 |
| OLIGO_10792 | AW464944 | SAFB2     | 0.0228  | 0.9459 | -0.163  | 0.6127 |
| OLIGO_10303 | AW464946 | SEC11L3   | 0.1769  | 0.5393 | 0.5773  | 0.0366 |
| OLIGO_08605 | AW464947 | VPRBP     | -0.2228 | 0.7073 | 0.3394  | 0.5617 |
| OLIGO_08606 | AW464950 | SUV420H1  | 0.2481  | 0.3224 | 0.5763  | 0.0188 |
| OLIGO_06044 | AW464952 | ARID5A    | 0.5774  | 0.3578 | -0.251  | 0.6781 |

|             |          |           |         |        |         |        |
|-------------|----------|-----------|---------|--------|---------|--------|
| OLIGO_08161 | AW464953 | COPB      | 0.4023  | 0.271  | -0.15   | 0.667  |
| OLIGO_11622 | AW464957 | Rgl1      | -0.005  | 0.9942 | -0.0239 | 0.9719 |
| OLIGO_10645 | AW464961 | TM9SF2    | -0.6628 | 0.0343 | 0.102   | 0.7317 |
| OLIGO_11547 | AW464962 | PPP1R16A  | -0.0579 | 0.9418 | -0.2133 | 0.779  |
| OLIGO_06061 | AW464967 | AHCYL1    | 0.6075  | 0.0535 | 0.5626  | 0.0618 |
| OLIGO_10297 | AW464969 | EMD       | -0.6899 | 0.0928 | -0.0548 | 0.889  |
| OLIGO_05902 | AW464972 | ITGA6     | 1.0412  | 0.0352 | 1.1842  | 0.0189 |
| OLIGO_03841 | AW464974 | LOC507686 | 0.0717  | 0.8305 | -0.5358 | 0.0954 |
| OLIGO_00308 | AW464976 | SNAPC3    | -0.5121 | 0.1229 | -0.1986 | 0.532  |
| OLIGO_11334 | AW464978 | HNRPL     | 0.1476  | 0.8006 | 0.435   | 0.4529 |
| OLIGO_07227 | AW464979 | ST13      | 0.0466  | 0.8875 | 0.108   | 0.7313 |
| OLIGO_10298 | AW464980 | CA2       | -0.1906 | 0.5735 | -0.1979 | 0.5399 |
| OLIGO_08607 | AW464985 | USP9X     | -0.0743 | 0.8164 | 0.4519  | 0.1383 |
| OLIGO_06040 | AW464986 | C1orf198  | 0.6727  | 0.1883 | 0.5825  | 0.2347 |
| OLIGO_11090 | AW464989 | FBXO11    | -0.1429 | 0.6467 | 0.0561  | 0.8504 |
| OLIGO_10442 | AW464991 | DCN       | -0.5383 | 0.3532 | -0.7909 | 0.1766 |
| OLIGO_05904 | AW464992 | CLTA      | 0.3455  | 0.239  | 0.4272  | 0.1291 |
| OLIGO_06046 | AW464995 | SMARCA5   | -0.2089 | 0.6172 | -0.682  | 0.0884 |
| OLIGO_10304 | AW464999 | KLHL21    | 0.0842  | 0.8748 | 0.3341  | 0.5147 |
| OLIGO_06048 | AW465006 | TFAP2C    | -0.8564 | 0.3897 | -0.6469 | 0.5053 |
| OLIGO_06063 | AW465008 | PRMT1     | 0.1896  | 0.5047 | 0.075   | 0.7827 |
| OLIGO_05895 | AW465009 | C12orf10  | 0.5067  | 0.2834 | 0.4149  | 0.3596 |
| OLIGO_10284 | AW465012 | YPEL2     | -0.0674 | 0.8871 | 0.2063  | 0.6507 |
| OLIGO_10292 | AW465015 | PEX16     | -0.7663 | 0.126  | -0.8011 | 0.0953 |
| OLIGO_05897 | AW465024 | PRMT5     | -0.3457 | 0.6359 | -0.2639 | 0.7062 |
| OLIGO_05905 | AW465025 | CEACAM19  | -0.3247 | 0.6745 | -0.1529 | 0.8397 |
| OLIGO_06050 | AW465029 | CPNE1     | 0.1535  | 0.8518 | 0.0158  | 0.984  |
| OLIGO_06056 | AW465030 | GRAMD3    | -0.4345 | 0.456  | -0.4984 | 0.3819 |
| OLIGO_06064 | AW465031 | RPS6KA3   | -0.7601 | 0.0105 | -0.5764 | 0.0421 |
| OLIGO_05898 | AW465035 | EGLN3     | 0.0919  | 0.8363 | 0.1085  | 0.7983 |
| OLIGO_08464 | AW465036 | TCAP      | 0.449   | 0.516  | 0.2795  | 0.6732 |
| OLIGO_08541 | AW465041 | NTAN1     | -0.0545 | 0.8707 | 0.0947  | 0.7672 |
| OLIGO_05899 | AW465043 | PPP5C     | -0.2647 | 0.4165 | 0.0536  | 0.8621 |
| OLIGO_06831 | AW465044 | PRDX3     | -0.6946 | 0.1383 | -0.3679 | 0.4126 |
| OLIGO_10662 | AW465050 | PSMB3     | 0.7152  | 0.0848 | 0.9402  | 0.0183 |
| OLIGO_03842 | AW465053 | UTP11L    | -0.4264 | 0.3056 | -0.7353 | 0.0657 |
| OLIGO_11463 | AW465054 | NCOA4     | -0.1322 | 0.6974 | 0.2171  | 0.5033 |
| OLIGO_10293 | AW465059 | USP15     | 0.0855  | 0.8402 | 0.1267  | 0.7602 |
| OLIGO_10302 | AW465060 | KRT15     | -0.1865 | 0.7664 | -0.124  | 0.8406 |
| OLIGO_10310 | AW465061 | FAM103A1  | -0.2977 | 0.2931 | -0.3707 | 0.1744 |
| OLIGO_10311 | AW465067 | GDPD1     | -0.6213 | 0.1296 | -0.4171 | 0.2881 |
| OLIGO_10295 | AW465072 | SNX12     | 0.526   | 0.2022 | 0.4892  | 0.2161 |
| OLIGO_07479 | AW465073 | CHCHD2    | 0.5853  | 0.0454 | -0.1864 | 0.5034 |
| OLIGO_10697 | AW465076 | CAP1      | 0.6704  | 0.1742 | 0.8497  | 0.0726 |
| OLIGO_09241 | AW465083 | SERPINA5  | -2.611  | 0.0011 | -2.2374 | 0.0035 |
| OLIGO_10820 | AW465088 | EGR1      | 1.3477  | 0.011  | 1.1173  | 0.0277 |
| OLIGO_06052 | AW465089 | TNFAIP8   | 0.115   | 0.8772 | -0.0284 | 0.969  |
| OLIGO_06060 | AW465090 | SGCE      | -0.5113 | 0.3407 | -0.1299 | 0.8007 |
| OLIGO_03843 | AW465093 | KCNT2     | 0.4686  | 0.1998 | -0.038  | 0.9139 |
| OLIGO_11139 | AW465097 | C13orf12  | 0.3176  | 0.3363 | -0.0189 | 0.9491 |
| OLIGO_08609 | AW465099 | MFSD5     | 0.3304  | 0.1024 | 0.3429  | 0.076  |
| OLIGO_06045 | AW465104 | CTBP1     | 0.1566  | 0.7288 | -0.4407 | 0.3082 |
| OLIGO_11609 | AW465110 | TMEM110   | 0.1268  | 0.695  | 0.0659  | 0.8309 |
| OLIGO_03844 | AW465111 | MRPS18C   | 0.5177  | 0.0962 | 0.3113  | 0.2981 |
| OLIGO_03104 | AW465112 | AVPI1     | 0.7998  | 0.1875 | 0.7203  | 0.2157 |

|             |          |           |         |        |         |        |
|-------------|----------|-----------|---------|--------|---------|--------|
| OLIGO_06053 | AW465115 | MYCBP     | -0.6325 | 0.0505 | -0.2443 | 0.4286 |
| OLIGO_08611 | AW465123 | TRIP12    | 0.3074  | 0.3362 | 0.6796  | 0.0264 |
| OLIGO_08085 | AW465125 | HADH2     | -0.4371 | 0.1371 | -0.2343 | 0.4054 |
| OLIGO_10318 | AW465128 | STX7      | 1.0244  | 0.0051 | 0.9395  | 0.0074 |
| OLIGO_08612 | AW465131 | GUK1      | -0.0905 | 0.7132 | 0.0527  | 0.8232 |
| OLIGO_06099 | AW465133 | LOC51136  | -0.1698 | 0.5378 | -0.0121 | 0.9633 |
| OLIGO_06710 | AW465134 | CCT6A     | 0.1899  | 0.7659 | 0.5531  | 0.366  |
| OLIGO_06068 | AW465141 | AP2S1     | 0.4367  | 0.1263 | 0.3082  | 0.2586 |
| OLIGO_07394 | AW465148 | GAS2L1    | 0.4473  | 0.3123 | 0.0695  | 0.8711 |
| OLIGO_08393 | AW465149 | SCARB2    | 0.1242  | 0.7297 | 0.5496  | 0.1614 |
| OLIGO_08537 | AW465157 | SHOX2     | 0.4052  | 0.2781 | -0.0289 | 0.9355 |
| OLIGO_08617 | AW465161 | TNFAIP3   | 0.8022  | 0.0376 | 0.1898  | 0.607  |
| OLIGO_03846 | AW465162 | PPTC7     | 0.7016  | 0.0468 | 0.411   | 0.2223 |
| OLIGO_07380 | AW465165 | FNTA      | -0.095  | 0.7678 | 0.3697  | 0.2298 |
| OLIGO_06087 | AW465166 | CEBPG     | 0.4191  | 0.3576 | 0.5584  | 0.2014 |
| OLIGO_07840 | AW465170 | CD63      | 0.7198  | 0.3125 | 1.1007  | 0.1075 |
| OLIGO_06822 | AW465171 | C1QA      | -0.9765 | 0.2122 | -0.6267 | 0.4061 |
| OLIGO_06088 | AW465181 | TMPRSS4   | -0.3553 | 0.1864 | -0.2484 | 0.3317 |
| OLIGO_08168 | AW465185 | SUMO1     | -0.2854 | 0.4686 | -0.1839 | 0.6278 |
| OLIGO_08804 | AW465186 | SLC31A2   | -0.0779 | 0.7864 | 0.0084  | 0.9756 |
| OLIGO_07422 | AW465187 | C6orf111  | -0.1315 | 0.7647 | -0.4837 | 0.2787 |
| OLIGO_11070 | AW465188 | CRNKL1    | 0.948   | 0.01   | 0.1778  | 0.6149 |
| OLIGO_06096 | AW465190 | MPST      | 0.1872  | 0.4768 | 0.0535  | 0.8317 |
| OLIGO_07788 | AW465191 | RRAS      | -0.1206 | 0.7587 | 0.0077  | 0.9837 |
| OLIGO_03848 | AW465195 | AXL       | 0.465   | 0.632  | 0.086   | 0.9277 |
| OLIGO_03849 | AW465197 | TNC       | -1.1513 | 0.0463 | -0.7835 | 0.1567 |
| OLIGO_03850 | AW465203 | CEP63     | -0.6492 | 0.1285 | -0.199  | 0.6263 |
| OLIGO_03851 | AW465208 | PQLC3     | 0.3523  | 0.5156 | 0.199   | 0.705  |
| OLIGO_10890 | AW465209 | PKM2      | 0.8821  | 0.0511 | 0.8802  | 0.0424 |
| OLIGO_06098 | AW465210 | JOSD3     | -0.1773 | 0.69   | -0.1538 | 0.7182 |
| OLIGO_06074 | AW465212 | GSR       | -0.1329 | 0.8248 | 0.2449  | 0.6705 |
| OLIGO_03852 | AW465213 | ZNF289    | 0.0984  | 0.7802 | 0.1372  | 0.6847 |
| OLIGO_08833 | AW465216 | SLC3A2    | 0.0861  | 0.8382 | -0.4117 | 0.3087 |
| OLIGO_07387 | AW465223 | PPP2R1A   | 1.099   | 0.0033 | 0.2396  | 0.5025 |
| OLIGO_06092 | AW465225 | GSTZ1     | -0.0942 | 0.8035 | 0.1871  | 0.6061 |
| OLIGO_10673 | AW465227 | ARMET     | 0.1787  | 0.5552 | 0.1048  | 0.7175 |
| OLIGO_03854 | AW465228 | CWF19L1   | -0.1813 | 0.688  | -0.3915 | 0.3839 |
| OLIGO_11188 | AW465232 | GPX4      | 0.1115  | 0.7665 | -0.0939 | 0.7917 |
| OLIGO_07135 | AW465233 | COX4I1    | -0.0508 | 0.9009 | 0.0715  | 0.8551 |
| OLIGO_08414 | AW465235 | S100A2    | 1.6639  | 0.0014 | 1.4623  | 0.0034 |
| OLIGO_06078 | AW465238 | PLEKHK1   | -1.0608 | 0.0966 | -0.4294 | 0.4822 |
| OLIGO_03855 | AW465240 | PPP6C     | 0.1257  | 0.7463 | 0.0086  | 0.9819 |
| OLIGO_06992 | AW465246 | YME1L1    | 0.1385  | 0.6524 | 0.3747  | 0.2029 |
| OLIGO_09002 | AW465247 | CYB5B     | 0.5185  | 0.0859 | 0.7284  | 0.012  |
| OLIGO_03856 | AW465249 | STX6      | 0.0852  | 0.8228 | -0.0759 | 0.8375 |
| OLIGO_00677 | AW465250 | SDHC      | 0.3119  | 0.5236 | 0.5316  | 0.2553 |
| OLIGO_06070 | AW465257 | ANAPC5    | -0.1654 | 0.6358 | -0.1819 | 0.5869 |
| OLIGO_08621 | AW465261 | MYOZ1     | 0.024   | 0.9618 | -0.2127 | 0.6577 |
| OLIGO_06071 | AW465262 | ZNF651    | 0.8324  | 0.1166 | 0.4082  | 0.4216 |
| OLIGO_08622 | AW465265 | QPCTL     | 0.2682  | 0.2309 | 0.0948  | 0.6615 |
| OLIGO_06094 | AW465272 | BXDC2     | -0.218  | 0.5072 | -0.0021 | 0.9947 |
| OLIGO_08624 | AW465274 | AAK1      | 0.4     | 0.3589 | 0.1478  | 0.7236 |
| OLIGO_03858 | AW465276 | EIF2B2    | -0.8819 | 0.0306 | -0.4582 | 0.2403 |
| OLIGO_06081 | AW465277 | NVL       | -0.3314 | 0.335  | -0.1655 | 0.6153 |
| OLIGO_10426 | AW465279 | LOC520580 | 0.8379  | 0.0081 | 0.9344  | 0.0021 |

|             |          |          |         |        |         |        |
|-------------|----------|----------|---------|--------|---------|--------|
| OLIGO_06097 | AW465280 | KLHL20   | -0.1471 | 0.6431 | 0.0298  | 0.922  |
| OLIGO_08276 | AW465283 | ANAPC13  | -0.0603 | 0.8643 | -0.1152 | 0.7337 |
| OLIGO_11402 | AW465286 | THOC5    | 0.0109  | 0.9726 | -0.2346 | 0.4399 |
| OLIGO_06089 | AW465287 | SH3GLB1  | 0.4342  | 0.1474 | 0.263   | 0.3578 |
| OLIGO_06090 | AW465294 | SLC17A7  | 0.8701  | 0.0309 | 0.3618  | 0.3483 |
| OLIGO_06681 | AW465295 | CCDC8    | -0.928  | 0.0097 | -0.4345 | 0.203  |
| OLIGO_03860 | AW465296 | TESSP2   | -0.1043 | 0.8448 | -0.4371 | 0.3924 |
| OLIGO_10577 | AW465299 | DLK1     | -0.5524 | 0.6402 | -0.8469 | 0.4691 |
| OLIGO_06949 | AW465305 | PCBP1    | 1.1113  | 0.0678 | 0.6508  | 0.264  |
| OLIGO_08628 | AW465307 | LPP      | -0.1723 | 0.7392 | -0.4524 | 0.3717 |
| OLIGO_06075 | AW465308 | PQBP1    | -0.5815 | 0.1588 | 0.0342  | 0.9305 |
| OLIGO_08631 | AW465320 | TGFBR2   | -0.085  | 0.8254 | -0.3478 | 0.3469 |
| OLIGO_03862 | AW465321 | HERC1    | 0.075   | 0.873  | 0.0318  | 0.9436 |
| OLIGO_10796 | AW465322 | KIAA0284 | 0.1963  | 0.5377 | 0.2199  | 0.4693 |
| OLIGO_07520 | AW465324 | ZMYM3    | -0.2473 | 0.3988 | -0.1242 | 0.6585 |
| OLIGO_06084 | AW465328 | B4GALT3  | -0.7942 | 0.1483 | -0.377  | 0.4739 |
| OLIGO_10724 | AW465330 | HARS2    | -0.0597 | 0.7949 | 0.2545  | 0.2457 |
| OLIGO_10856 | AW465331 | IER3     | 2.029   | 0      | 1.5535  | 0.0003 |
| OLIGO_10776 | AW465337 | S100A11  | 1.4786  | 0.0427 | 0.9354  | 0.1805 |
| OLIGO_03863 | AW465340 | TGIF     | 0.6152  | 0.0854 | -0.014  | 0.9672 |
| OLIGO_11403 | AW465344 | IL22RA1  | -1.0536 | 0.0106 | -0.3059 | 0.4376 |
| OLIGO_06093 | AW465345 | WDR18    | -0.2382 | 0.7147 | -0.2513 | 0.6939 |
| OLIGO_03864 | AW465346 | MBNL3    | -0.5271 | 0.2432 | 0.2616  | 0.5449 |
| OLIGO_06085 | AW465351 | DCTN6    | 0.1624  | 0.5411 | 0.2302  | 0.3648 |
| OLIGO_08162 | AW465353 | ARL4A    | 0.1244  | 0.7531 | -0.3734 | 0.3273 |
| OLIGO_11330 | AW465354 | TUBG2    | -0.4426 | 0.2077 | -0.5166 | 0.15   |
| OLIGO_06079 | AW465355 | GLB1     | 0.3022  | 0.3619 | 0.2745  | 0.3875 |
| OLIGO_08633 | AW465357 | MBNL1    | 1.1553  | 0.0061 | 0.5016  | 0.2096 |
| OLIGO_11367 | AW465360 | OSBPL9   | 0.2804  | 0.483  | 0.0321  | 0.9323 |
| OLIGO_03865 | AW465363 | BIRC6    | -0.4195 | 0.2261 | 0.0788  | 0.8116 |
| OLIGO_06104 | AW465370 | PNPT1    | -0.0997 | 0.7073 | -0.0905 | 0.7215 |
| OLIGO_10618 | AW465372 | TP53I13  | 0.0118  | 0.9842 | -0.0047 | 0.9935 |
| OLIGO_06136 | AW465382 | HPSE     | -2.7272 | 0.0323 | -1.1083 | 0.2933 |
| OLIGO_03867 | AW465385 | TAF5L    | -0.0065 | 0.9871 | 0.2311  | 0.5459 |
| OLIGO_11326 | AW465398 | HES1     | 0.9287  | 0.0105 | 0.6095  | 0.079  |
| OLIGO_08084 | AW465399 | AHSA1    | 0.1984  | 0.461  | 0.1822  | 0.4794 |
| OLIGO_07012 | AW465404 | HMGN2    | 0.8578  | 0.122  | 0.4142  | 0.4369 |
| OLIGO_06137 | AW465405 | RBM15    | -0.3595 | 0.3198 | 0.0656  | 0.8488 |
| OLIGO_08637 | AW465410 | Pdcd6    | -0.0186 | 0.9572 | 0.4263  | 0.1998 |
| OLIGO_03869 | AW465415 | GOSR1    | -0.1712 | 0.5137 | 0.1232  | 0.6226 |
| OLIGO_06106 | AW465416 | RASSF6   | -1.0431 | 0.1876 | -0.9662 | 0.1946 |
| OLIGO_10992 | AW465424 | CENTG3   | 0.6917  | 0.101  | 0.8463  | 0.0366 |
| OLIGO_03808 | AW465425 | CCT2     | 0.4329  | 0.2313 | 0.602   | 0.0819 |
| OLIGO_03871 | AW465426 | NAGLU    | -0.6034 | 0.2351 | -0.4168 | 0.3921 |
| OLIGO_08638 | AW465429 | YTHDF2   | -0.1434 | 0.5539 | 0.1542  | 0.5071 |
| OLIGO_06101 | AW465435 | FLJ22709 | -0.5698 | 0.1032 | -0.1518 | 0.6503 |
| OLIGO_06127 | AW465450 | C1orf133 | -0.3252 | 0.5075 | -0.2941 | 0.532  |
| OLIGO_10594 | AW465453 | NDUFB10  | 0.0542  | 0.8791 | -0.1197 | 0.7249 |
| OLIGO_06105 | AW465454 | SFN      | 0.6905  | 0.2363 | 0.4843  | 0.3861 |
| OLIGO_11329 | AW465456 | TP53BP1  | -0.6226 | 0.285  | -0.3744 | 0.5066 |
| OLIGO_08388 | AW465457 | C17orf61 | 0.3191  | 0.2697 | 0.3934  | 0.1558 |
| OLIGO_07379 | AW465458 | C1orf54  | -0.4743 | 0.298  | -0.6991 | 0.1166 |
| OLIGO_00383 | AW465461 | MME      | -1.3693 | 0.034  | -0.5809 | 0.3472 |
| OLIGO_10866 | AW465463 | EGLN2    | 0.3682  | 0.3852 | -0.2655 | 0.5083 |
| OLIGO_03877 | AW465465 | FAM55C   | 0.9858  | 0.0024 | 0.8012  | 0.0104 |

|             |          |           |         |        |         |        |
|-------------|----------|-----------|---------|--------|---------|--------|
| OLIGO_07046 | AW465466 | GNG5      | 0.3919  | 0.1188 | 0.2238  | 0.3497 |
| OLIGO_08178 | AW465469 | EXOSC1    | -0.994  | 0.1745 | 0.4245  | 0.5299 |
| OLIGO_08647 | AW465471 | PSMB5     | 0.5582  | 0.326  | 0.24    | 0.6595 |
| OLIGO_10828 | AW465472 | ZNF281    | -0.5762 | 0.1398 | -0.4186 | 0.2626 |
| OLIGO_08648 | AW465475 | INSIG2    | -0.0891 | 0.846  | 0.0573  | 0.8983 |
| OLIGO_06113 | AW465478 | FARSLA    | -0.4576 | 0.1813 | -0.3374 | 0.3023 |
| OLIGO_06107 | AW465485 | COQ5      | 0.4135  | 0.2878 | 0.4218  | 0.2757 |
| OLIGO_10180 | AW465489 | HS2ST1    | 0.0028  | 0.9931 | -0.001  | 0.9973 |
| OLIGO_03878 | AW465490 | OLFML2A   | 0.1971  | 0.837  | -0.0177 | 0.9851 |
| OLIGO_09342 | AW465497 | KLHDC3    | -0.1468 | 0.6607 | -0.2357 | 0.4622 |
| OLIGO_06126 | AW465500 | VEGFB     | 0.331   | 0.3736 | 0.0564  | 0.8732 |
| OLIGO_10829 | AW465501 | ROBO4     | 0.2874  | 0.4286 | -0.0372 | 0.9148 |
| OLIGO_03880 | AW465507 | LOC497190 | -0.0423 | 0.9    | -0.0848 | 0.793  |
| OLIGO_08757 | AW465512 | FAM96A    | 0.4301  | 0.2232 | 0.5051  | 0.1358 |
| OLIGO_06138 | AW465514 | COPE      | 0.4245  | 0.2195 | -0.3781 | 0.2655 |
| OLIGO_06039 | AW465516 | FCGR3B    | 0.6955  | 0.4377 | 0.0485  | 0.9554 |
| OLIGO_06121 | AW465522 | C18orf30  | 0.1105  | 0.769  | 0.0208  | 0.9542 |
| OLIGO_03873 | AW465535 | MAN2A1    | -1.2816 | 0.0065 | -0.7383 | 0.1081 |
| OLIGO_11405 | AW465539 | LOC534323 | -0.3057 | 0.4108 | -0.0985 | 0.7807 |
| OLIGO_06109 | AW465545 | PLEKHA8   | -0.1386 | 0.8078 | 0.0252  | 0.9613 |
| OLIGO_10157 | AW465546 | SSRP1     | -0.0827 | 0.797  | 0.317   | 0.3016 |
| OLIGO_06135 | AW465550 | CTSE      | -2.1245 | 0.0994 | -0.6335 | 0.6077 |
| OLIGO_03874 | AW465553 | VPS13A    | 0.0522  | 0.9    | 0.0632  | 0.8752 |
| OLIGO_06591 | AW465555 | CAPZA1    | 0.3267  | 0.2573 | 0.0131  | 0.9622 |
| OLIGO_06620 | AW465559 | C10orf118 | -0.7406 | 0.1352 | -0.3658 | 0.4387 |
| OLIGO_06110 | AW465565 | PWP1      | 0.5805  | 0.2252 | 0.6744  | 0.1437 |
| OLIGO_08307 | AW465566 | TGM2      | -0.1086 | 0.6745 | -0.1285 | 0.6019 |
| OLIGO_06130 | AW465567 | BCAP31    | 0.5455  | 0.1719 | 0.7736  | 0.0436 |
| OLIGO_08643 | AW465570 | SH3D19    | -0.1056 | 0.7621 | -0.0211 | 0.9498 |
| OLIGO_07141 | AW465571 | MALAT1    | 0.945   | 0.0574 | 0.6976  | 0.143  |
| OLIGO_08644 | AW465577 | OTUB1     | 0.138   | 0.5915 | -0.0167 | 0.9461 |
| OLIGO_03875 | AW465578 | PGS1      | 0.2105  | 0.7248 | 0.5441  | 0.3612 |
| OLIGO_06123 | AW465583 | CCNDBP1   | 0.4808  | 0.0494 | 0.2294  | 0.3273 |
| OLIGO_03876 | AW465587 | MCF2L     | 0.3193  | 0.5019 | 0.6816  | 0.1352 |
| OLIGO_08732 | AW465588 | PPGB      | -0.4612 | 0.1622 | -0.1107 | 0.727  |
| OLIGO_06112 | AW465590 | AAMP      | 0.0223  | 0.9415 | -0.0065 | 0.9822 |
| OLIGO_06116 | AW465591 | CDK2      | 0.418   | 0.2166 | 0.67    | 0.0677 |
| OLIGO_02482 | AW465592 | DNAJC17   | 0.8515  | 0.2802 | 0.4251  | 0.5737 |
| OLIGO_08654 | AW465595 | TSPAN14   | -1.1278 | 0.0081 | -0.5436 | 0.1798 |
| OLIGO_06122 | AW465603 | C2orf32   | -0.1105 | 0.7471 | -0.0756 | 0.818  |
| OLIGO_06527 | AW465609 | CITED1    | -1.8355 | 0.0388 | -0.569  | 0.4118 |
| OLIGO_08657 | AW465613 | HSPA14    | -0.4394 | 0.2852 | -0.2198 | 0.5769 |
| OLIGO_08658 | AW465616 | TRIM24    | -0.1598 | 0.6523 | 0.2563  | 0.4501 |
| OLIGO_03881 | AW465617 | ZNF654    | 0.2768  | 0.4845 | 0.0682  | 0.8442 |
| OLIGO_06118 | AW465627 | TARBP1    | 0.5904  | 0.0361 | 0.4022  | 0.1342 |
| OLIGO_03882 | AW465633 | RSN       | 0.2675  | 0.6328 | 0.4273  | 0.4412 |
| OLIGO_03883 | AW465639 | TLN2      | 0.3825  | 0.7208 | 0.153   | 0.8853 |
| OLIGO_00228 | AW465641 | TBC1D12   | 0.8006  | 0.0223 | 0.6111  | 0.0684 |
| OLIGO_11408 | AW465656 | EFNB2     | -2.149  | 0.0005 | -1.0833 | 0.0653 |
| OLIGO_09987 | AW465659 | ATF5      | 0.0166  | 0.9578 | -0.4355 | 0.1965 |
| OLIGO_06159 | AW465664 | SERTAD2   | 0.1336  | 0.6337 | 0.2658  | 0.3229 |
| OLIGO_06143 | AW465669 | MBD4      | -0.2185 | 0.6892 | -0.3939 | 0.4542 |
| OLIGO_06180 | AW465670 | POLG      | -0.1639 | 0.5784 | 0.0305  | 0.9141 |
| OLIGO_06149 | AW465674 | BLCAP     | -0.2722 | 0.3388 | 0.0802  | 0.7676 |
| OLIGO_09412 | AW465678 | TRAF4     | -0.0571 | 0.828  | -0.0114 | 0.9641 |



|             |          |               |         |        |         |        |
|-------------|----------|---------------|---------|--------|---------|--------|
| OLIGO_06184 | AW465679 | VPS26B        | 0.0583  | 0.9252 | -0.1931 | 0.7517 |
| OLIGO_06170 | AW465683 | ZNF677        | -0.1076 | 0.8017 | -0.0727 | 0.8596 |
| OLIGO_08459 | AW465690 | SLPI          | 0.2153  | 0.5218 | -0.1762 | 0.5847 |
| OLIGO_06144 | AW465691 | LOC158563     | -1.6964 | 0.005  | -0.7144 | 0.2114 |
| OLIGO_03884 | AW465694 | 4932413O14Rik | 0.4226  | 0.2803 | 0.1232  | 0.744  |
| OLIGO_06160 | AW465696 | NFATC1        | 0.0405  | 0.9211 | 0.3343  | 0.3939 |
| OLIGO_11236 | AW465700 | XAB1          | 0.3242  | 0.4442 | 0.3751  | 0.3559 |
| OLIGO_03885 | AW465701 | RCOR1         | 0.054   | 0.9074 | 0.4852  | 0.2764 |
| OLIGO_06181 | AW465702 | C10orf28      | -0.5151 | 0.1433 | -0.0708 | 0.8335 |
| OLIGO_06175 | AW465706 | TOPORS        | -0.2008 | 0.5867 | 0.0308  | 0.9305 |
| OLIGO_06854 | AW465708 | ACIN1         | -0.5726 | 0.0588 | -0.3504 | 0.2253 |
| OLIGO_06147 | AW465712 | SEC61A1       | -0.0109 | 0.9713 | 0.2843  | 0.3259 |
| OLIGO_10712 | AW465714 | BSG           | 0.6004  | 0.1689 | 0.7364  | 0.0784 |
| OLIGO_06176 | AW465715 | Ptpmt1        | 0.0104  | 0.9653 | 0.0498  | 0.8287 |
| OLIGO_09985 | AW465716 | CENP-A        | 0.1191  | 0.7811 | 0.03    | 0.9416 |
| OLIGO_10731 | AW465723 | MAST2         | -0.0702 | 0.8361 | 0.0891  | 0.7834 |
| OLIGO_06154 | AW465726 | RIPK2         | 0.8288  | 0.1514 | 0.3259  | 0.5577 |
| OLIGO_06167 | AW465731 | TCF19         | 0.5447  | 0.0741 | 0.2996  | 0.3031 |
| OLIGO_07071 | AW465735 | SIKE          | 0.117   | 0.7593 | 0.6588  | 0.0725 |
| OLIGO_06171 | AW465736 | SORD          | -0.7082 | 0.041  | -0.2559 | 0.4359 |
| OLIGO_06178 | AW465739 | IMMP2L        | 0.3283  | 0.535  | 0.1883  | 0.7104 |
| OLIGO_08143 | AW465745 | PKN1          | -0.0678 | 0.8434 | -0.2382 | 0.4936 |
| OLIGO_02876 | AW465750 | YY1           | 0.6951  | 0.0427 | 0.4555  | 0.1655 |
| OLIGO_06140 | AW465754 | EIF4B         | 0.5588  | 0.0659 | -0.2328 | 0.4211 |
| OLIGO_06157 | AW465760 | UTP11L        | -0.173  | 0.5415 | 0.2009  | 0.46   |
| OLIGO_06142 | AW465764 | MARK4         | -2.4535 | 0.0617 | -1.7931 | 0.1484 |
| OLIGO_06158 | AW465767 | UBE2G2        | -0.0798 | 0.8045 | -0.0518 | 0.867  |
| OLIGO_08664 | AW465770 | SPEN          | -0.3556 | 0.1697 | 0.0559  | 0.8217 |
| OLIGO_03887 | AW465775 | ZNRF1         | 0.3167  | 0.5457 | -0.2387 | 0.6348 |
| OLIGO_06177 | AW465777 | DCLRE1B       | 0.2583  | 0.5552 | 0.7465  | 0.0746 |
| OLIGO_11325 | AW465778 | EIF3S6IP      | -0.5703 | 0.1163 | -0.0376 | 0.9138 |
| OLIGO_08666 | AW465784 | FAU           | -0.0649 | 0.8745 | -0.3486 | 0.3755 |
| OLIGO_11115 | AW465786 | TSPAN3        | 0.4373  | 0.2316 | 0.2245  | 0.5214 |
| OLIGO_08667 | AW465789 | PTDSS1        | 0.0021  | 0.9949 | 0.1907  | 0.5467 |
| OLIGO_06185 | AW465793 | TRIM65        | -0.0154 | 0.9682 | -0.0172 | 0.963  |
| OLIGO_06150 | AW465795 | PFDN1         | 0.2929  | 0.5124 | 0.5557  | 0.1944 |
| OLIGO_07715 | AW465802 | RTN4          | 1.4003  | 0.0073 | 0.8592  | 0.085  |
| OLIGO_03888 | AW465803 | AK3L1         | -0.6664 | 0.2317 | -0.1961 | 0.7078 |
| OLIGO_08004 | AW465805 | DUT           | 0.9701  | 0.1123 | 0.451   | 0.4407 |
| OLIGO_08668 | AW465807 | CSNK1A1       | -0.3926 | 0.2834 | 0.0095  | 0.9783 |
| OLIGO_08669 | AW465808 | LRRC51        | -0.1996 | 0.6808 | 0.0262  | 0.9551 |
| OLIGO_11108 | AW465809 | ITM2B         | 1.1597  | 0.0522 | 0.9831  | 0.0859 |
| OLIGO_11153 | AW465811 | GMIP          | 0.3559  | 0.2183 | -0.3149 | 0.2552 |
| OLIGO_08670 | AW465812 | ECHDC2        | 0.4158  | 0.1573 | 0.2986  | 0.2892 |
| OLIGO_06152 | AW465814 | LOC540037     | 0.047   | 0.8914 | -0.4022 | 0.2234 |
| OLIGO_11411 | AW465817 | NDUFS2        | 0.2272  | 0.2981 | 0.0478  | 0.8181 |
| OLIGO_10396 | AW465820 | BDH2          | 0.989   | 0.0412 | 0.4419  | 0.3404 |
| OLIGO_10467 | AW465831 | TMEM4         | -0.3493 | 0.2684 | 0.1209  | 0.6906 |
| OLIGO_03406 | AW465832 | SERP1         | 0.7559  | 0.1966 | 0.5078  | 0.3634 |
| OLIGO_10402 | AW465836 | VAMP3         | -0.5865 | 0.0301 | -0.1299 | 0.6153 |
| OLIGO_06153 | AW465842 | LOC539899     | 2.6529  | 0.0114 | 0.9677  | 0.271  |
| OLIGO_06161 | AW465843 | C6orf55       | -0.1124 | 0.7346 | 0.0634  | 0.8412 |
| OLIGO_08673 | AW465847 | CSNK1E        | -0.1831 | 0.5454 | -0.4552 | 0.1174 |
| OLIGO_06183 | AW465849 | PCBP4         | -0.3751 | 0.3015 | -0.2885 | 0.407  |
| OLIGO_06186 | AW465850 | PWWP2         | -0.4725 | 0.439  | -0.5014 | 0.3917 |

|             |          |           |         |        |         |        |
|-------------|----------|-----------|---------|--------|---------|--------|
| OLIGO_06155 | AW465852 | FBXL17    | 1.1134  | 0.0098 | 0.4547  | 0.2699 |
| OLIGO_07971 | AW465855 | EPB41     | -0.0299 | 0.9564 | -0.4818 | 0.3859 |
| OLIGO_08009 | AW465859 | RPUSD3    | 0.0895  | 0.7838 | 0.3051  | 0.3318 |
| OLIGO_11047 | AW465872 | MRPL50    | 0.1519  | 0.6398 | 0.4714  | 0.1297 |
| OLIGO_10832 | AW465873 | DHX9      | 0.2127  | 0.6093 | 0.2309  | 0.5725 |
| OLIGO_08675 | AW465881 | NFKB1     | -0.2748 | 0.4917 | -0.2712 | 0.4778 |
| OLIGO_03891 | AW465883 | WDR33     | 0.3625  | 0.2464 | -0.1749 | 0.557  |
| OLIGO_06156 | AW465886 | DYRK1A    | 0.2604  | 0.3007 | 0.0601  | 0.8025 |
| OLIGO_06163 | AW465887 | VEGF      | -0.1667 | 0.6877 | -0.1704 | 0.6696 |
| OLIGO_06169 | AW465888 | ERCC8     | -0.4651 | 0.1463 | -0.0298 | 0.9224 |
| OLIGO_08677 | AW465892 | MPG       | -0.3628 | 0.155  | -0.079  | 0.7466 |
| OLIGO_03801 | AW465902 | C1orf26   | -0.4151 | 0.2169 | -0.1689 | 0.6    |
| OLIGO_06216 | AW465906 | DNPEP     | -0.1431 | 0.7793 | -0.1353 | 0.7833 |
| OLIGO_10408 | AW465907 | NSFL1C    | -0.4594 | 0.1039 | -0.2486 | 0.3554 |
| OLIGO_06196 | AW465908 | LOC253012 | -0.422  | 0.7059 | -0.2533 | 0.8168 |
| OLIGO_07267 | AW465909 | HSPA9B    | 1.4622  | 0.03   | 1.3376  | 0.0384 |
| OLIGO_06188 | AW465913 | C6orf120  | -0.0216 | 0.9434 | 0.2335  | 0.4264 |
| OLIGO_06191 | AW465914 | TMEM50A   | 0.6252  | 0.0969 | 0.5889  | 0.1029 |
| OLIGO_08371 | AW465915 | ARFGAP1   | -0.0794 | 0.811  | 0.0171  | 0.9571 |
| OLIGO_08680 | AW465924 | LOC513673 | 0.1958  | 0.3635 | 0.3907  | 0.0579 |
| OLIGO_11479 | AW465927 | TM2D1     | -0.208  | 0.4595 | -0.2586 | 0.3376 |
| OLIGO_03892 | AW465929 | UBE2E3    | -0.4656 | 0.1174 | -0.334  | 0.2391 |
| OLIGO_11413 | AW465930 | CRY2      | 0.959   | 0.0064 | 0.3707  | 0.2668 |
| OLIGO_06224 | AW465932 | ASF1A     | -0.348  | 0.3777 | 0.3523  | 0.3516 |
| OLIGO_08681 | AW465947 | CAPN2     | -0.0697 | 0.8282 | 0.236   | 0.4686 |
| OLIGO_06213 | AW465953 | NSD1      | -0.5007 | 0.2655 | -0.6634 | 0.1512 |
| OLIGO_07722 | AW465956 | C1orf93   | -0.0751 | 0.7516 | 0.2204  | 0.3315 |
| OLIGO_03893 | AW465959 | SENP8     | -0.3993 | 0.4628 | -0.2775 | 0.5963 |
| OLIGO_03894 | AW465966 | VPS16     | 0.4013  | 0.3182 | 0.3634  | 0.3517 |
| OLIGO_06192 | AW465967 | DBNDD1    | 0.5856  | 0.3977 | 0.3558  | 0.5975 |
| OLIGO_06877 | AW465971 | SEPP1     | -1.3606 | 0.028  | -0.8002 | 0.1751 |
| OLIGO_06220 | AW465975 | TEAD4     | -0.4903 | 0.2427 | -0.3806 | 0.3407 |
| OLIGO_08487 | AW465978 | GADD45A   | -1.1166 | 0.0148 | 0.0286  | 0.9478 |
| OLIGO_06193 | AW465980 | HTLF      | -0.4271 | 0.2297 | 0.2466  | 0.4692 |
| OLIGO_06207 | AW465994 | GNB2      | 0.0819  | 0.7508 | 0.0979  | 0.6922 |
| OLIGO_06199 | AW466001 | BAD       | -0.3951 | 0.276  | -0.1315 | 0.7033 |
| OLIGO_06221 | AW466005 | PLA1A     | -0.0328 | 0.9207 | 0.1033  | 0.7439 |
| OLIGO_06190 | AW466008 | CTAGE5    | -0.1111 | 0.7446 | 0.1035  | 0.7563 |
| OLIGO_06200 | AW466009 | TIMM8A    | -0.2532 | 0.5447 | 0.1492  | 0.7096 |
| OLIGO_06187 | AW466012 | PDK3      | 0.233   | 0.7094 | 0.476   | 0.4483 |
| OLIGO_06222 | AW466013 | RIPK1     | 0.2538  | 0.315  | 0.1682  | 0.4841 |
| OLIGO_03895 | AW466016 | WBP5      | -1.9923 | 0.002  | -0.7797 | 0.2162 |
| OLIGO_06867 | AW466020 | CTSF      | 0.5337  | 0.1826 | 0.2857  | 0.4547 |
| OLIGO_11445 | AW466022 | FLJ13576  | -0.2838 | 0.3364 | -0.3418 | 0.2272 |
| OLIGO_08911 | AW466023 | SF3B1     | 0.2423  | 0.4999 | 0.0239  | 0.9456 |
| OLIGO_03896 | AW466027 | NHEJ1     | -0.5426 | 0.0781 | 0.0117  | 0.9683 |
| OLIGO_03897 | AW466028 | C1orf21   | 0.1889  | 0.6276 | 0.5452  | 0.1471 |
| OLIGO_06208 | AW466039 | BC055107  | 0.1838  | 0.6456 | 0.1749  | 0.6465 |
| OLIGO_06209 | AW466048 | FURIN     | -0.3606 | 0.4975 | -0.2862 | 0.5742 |
| OLIGO_06223 | AW466051 | ADSL      | 0.3543  | 0.2647 | 0.9882  | 0.0013 |
| OLIGO_07107 | AW466055 | ATP5B     | 0.5624  | 0.2504 | 0.6772  | 0.1486 |
| OLIGO_06211 | AW466063 | LOC515049 | -0.0625 | 0.9071 | -0.0283 | 0.9567 |
| OLIGO_06205 | AW466070 | KIFC3     | -0.4859 | 0.0746 | -0.3903 | 0.1351 |
| OLIGO_03639 | AW466074 | CFL1      | 0.9084  | 0.2438 | 1.1638  | 0.1196 |
| OLIGO_04341 | AW466075 | TP53I11   | -0.2493 | 0.6556 | -0.1784 | 0.7393 |

|             |          |           |         |        |         |        |
|-------------|----------|-----------|---------|--------|---------|--------|
| OLIGO_03644 | AW466077 | DDX47     | 0.2423  | 0.4297 | -0.0029 | 0.992  |
| OLIGO_03900 | AW466079 | ENPEP     | -2.6271 | 0.0068 | -2.0676 | 0.0264 |
| OLIGO_06197 | AW466083 | ZDHHC5    | -0.6416 | 0.1396 | 0.0279  | 0.9466 |
| OLIGO_06214 | AW466086 | FBXO32    | -0.5229 | 0.5612 | -0.5479 | 0.5239 |
| OLIGO_06219 | AW466087 | IFI6      | 1.1249  | 0.0093 | 0.4921  | 0.2318 |
| OLIGO_03901 | AW466088 | ADAM19    | -0.9234 | 0.1013 | -0.6    | 0.2664 |
| OLIGO_10834 | AW466092 | C1orf78   | 0.0594  | 0.8289 | 0.1764  | 0.502  |
| OLIGO_11416 | AW466093 | Cyhr1     | -0.1382 | 0.7518 | -0.1976 | 0.6453 |
| OLIGO_03902 | AW466094 | LOC648591 | 0.6029  | 0.0904 | 0.0914  | 0.7894 |
| OLIGO_03903 | AW466096 | PARN      | 0.1068  | 0.7026 | 0.1554  | 0.5598 |
| OLIGO_03904 | AW466097 | IGSF2     | -0.9719 | 0.1324 | -0.7487 | 0.2194 |
| OLIGO_07927 | AW466104 | DSTN      | 0.6069  | 0.021  | 0.4541  | 0.0706 |
| OLIGO_07497 | AW466110 | EWSR1     | -0.5095 | 0.0228 | -0.1192 | 0.5742 |
| OLIGO_11193 | AW466113 | FLJ11806  | -0.3134 | 0.2536 | 0.0042  | 0.9873 |
| OLIGO_06206 | AW466122 | NHLRC2    | 0.0519  | 0.9091 | 0.2442  | 0.5752 |
| OLIGO_01829 | AW466123 | PLCL2     | 0.6752  | 0.0859 | 0.5756  | 0.1251 |
| OLIGO_06215 | AW466124 | COPS2     | 1.1872  | 0.215  | 0.822   | 0.3704 |
| OLIGO_08419 | AW466128 | MGC10433  | 0.3185  | 0.3048 | 0.1288  | 0.6507 |
| OLIGO_06554 | AW466134 | AASDHPPT  | 0.5898  | 0.1951 | 0.2003  | 0.6461 |
| OLIGO_03905 | AW466135 | LOC535927 | -0.3966 | 0.507  | -0.216  | 0.7085 |
| OLIGO_11267 | AW466136 | ITGB2     | 0.5985  | 0.2466 | 0.3422  | 0.4894 |
| OLIGO_03945 | AW466137 | SOAT1     | -0.0553 | 0.9236 | -0.0945 | 0.8667 |
| OLIGO_08688 | AW466138 | Als4      | 0.4406  | 0.123  | 0.1839  | 0.503  |
| OLIGO_10456 | AW466140 | ODF2      | 0.1534  | 0.7167 | 0.1089  | 0.7882 |
| OLIGO_01489 | AW466144 | KEAP1     | 0.204   | 0.5757 | 0.1523  | 0.6629 |
| OLIGO_08689 | AW466145 | CD48      | -0.1382 | 0.7949 | 0.0301  | 0.9526 |
| OLIGO_06876 | AW466147 | ANXA2     | 1.0945  | 0.013  | 1.3507  | 0.0014 |
| OLIGO_03906 | AW466149 | C1orf168  | -1.2311 | 0.0123 | -0.8054 | 0.0857 |
| OLIGO_01134 | AW466155 | RAC3      | -0.4535 | 0.6283 | -0.2198 | 0.8079 |
| OLIGO_06896 | AW466163 | SSR3      | -0.1358 | 0.6968 | 0.3224  | 0.335  |
| OLIGO_10915 | AW466164 | LOC613430 | -0.3867 | 0.2684 | 0.2219  | 0.5069 |
| OLIGO_11417 | AW466167 | ROCK2     | 0.5795  | 0.1105 | 0.6812  | 0.0695 |
| OLIGO_03908 | AW466168 | AIP       | 0.4549  | 0.1434 | 0.6115  | 0.0405 |
| OLIGO_09025 | AW466169 | PMM1      | 0.3148  | 0.6386 | -0.1284 | 0.8457 |
| OLIGO_10835 | AW466173 | AQP1      | -1.5888 | 0.0007 | -0.8569 | 0.0532 |
| OLIGO_02027 | AW466175 | USP47     | 0.0813  | 0.842  | -0.0933 | 0.815  |
| OLIGO_10836 | AW466176 | C1orf107  | -0.5062 | 0.1089 | -0.3507 | 0.2464 |
| OLIGO_03911 | AW466178 | POLL      | -0.5589 | 0.2975 | -0.6926 | 0.1783 |
| OLIGO_08690 | AW466182 | LOC529905 | -0.3019 | 0.3444 | -0.2776 | 0.3645 |
| OLIGO_10072 | AW466183 | MRPL11    | 0.0971  | 0.8049 | 0.1782  | 0.6363 |
| OLIGO_03912 | AW466185 | WAPAL     | -0.1011 | 0.7496 | 0.4065  | 0.243  |
| OLIGO_03913 | AW466186 | C14orf111 | -0.0677 | 0.7925 | 0.238   | 0.3329 |
| OLIGO_10715 | AW466188 | DGUOK     | 0.4459  | 0.229  | 0.1022  | 0.7587 |
| OLIGO_04035 | AW466189 | CTSH      | 0.6814  | 0.077  | 0.1113  | 0.7617 |
| OLIGO_03914 | AW466190 | CYBRD1    | 1.0842  | 0.1019 | 1.1302  | 0.0874 |
| OLIGO_03915 | AW466194 | ITGA3     | 0.3338  | 0.4718 | 0.3942  | 0.3755 |
| OLIGO_08691 | AW466195 | EDF1      | 0.2393  | 0.4352 | 0.4771  | 0.1051 |
| OLIGO_11418 | AW466198 | MSRA      | 0.0217  | 0.9721 | 0.1861  | 0.7603 |
| OLIGO_06817 | AW466200 | CRABP2    | -2.2144 | 0.0021 | -1.1647 | 0.0909 |
| OLIGO_10837 | AW466205 | CIDEA     | -0.0317 | 0.955  | -0.3694 | 0.4928 |
| OLIGO_03916 | AW466208 | EAF2      | -0.4106 | 0.4623 | -0.0357 | 0.9471 |
| OLIGO_09227 | AW466209 | LOXL3     | -0.6403 | 0.1002 | 0.0638  | 0.8631 |
| OLIGO_10546 | AW466210 | DNAJB6    | 0.2959  | 0.308  | 0.1417  | 0.6085 |
| OLIGO_06226 | AW466211 | WTAP      | 0.1154  | 0.7687 | 0.2373  | 0.5283 |
| OLIGO_04690 | BF039020 | KIF2C     | -0.0424 | 0.9136 | -0.3278 | 0.3798 |

|             |          |           |         |        |         |        |
|-------------|----------|-----------|---------|--------|---------|--------|
| OLIGO_10004 | BF039021 | KIAA0179  | -0.5449 | 0.0654 | -0.2495 | 0.3778 |
| OLIGO_04681 | BF039023 | HOOK2     | 0.1147  | 0.87   | 0.0527  | 0.9393 |
| OLIGO_09325 | BF039028 | PRKCSH    | 0.1489  | 0.6561 | 0.0075  | 0.9814 |
| OLIGO_04685 | BF039035 | EEF1E1    | 0.3697  | 0.2347 | -0.0472 | 0.8749 |
| OLIGO_04682 | BF039039 | CD80      | 0.4474  | 0.6612 | -0.1273 | 0.8972 |
| OLIGO_04683 | BF039041 | CDC42BPG  | 1.014   | 0.1884 | 0.6254  | 0.3972 |
| OLIGO_04693 | BF039045 | DLX5      | -1.2808 | 0.0757 | -0.6146 | 0.3729 |
| OLIGO_08699 | BF039051 | PYCR2     | -0.0117 | 0.9774 | 0.3958  | 0.3167 |
| OLIGO_11669 | BF039061 | GMPPA     | 0.2437  | 0.3912 | -0.0888 | 0.7444 |
| OLIGO_00347 | BF039065 | 40430     | 0.1059  | 0.7925 | 0.692   | 0.0734 |
| OLIGO_04696 | BF039066 | SPSB3     | 0.6333  | 0.2465 | 0.3385  | 0.5161 |
| OLIGO_04695 | BF039067 | ARRB2     | -0.0729 | 0.8466 | -0.2735 | 0.4485 |
| OLIGO_04191 | BF039087 | ZNF492    | -0.8055 | 0.1611 | -0.2652 | 0.63   |
| OLIGO_04200 | BF039090 | ETV5      | 0.5457  | 0.143  | 0.707   | 0.048  |
| OLIGO_04198 | BF039097 | ST3GAL1   | -0.3656 | 0.6412 | -0.3514 | 0.6489 |
| OLIGO_04694 | BF039104 | STS-1     | 0.1994  | 0.6457 | 0.0539  | 0.898  |
| OLIGO_04686 | BF039110 | FLJ13197  | 0.356   | 0.5604 | 0.3557  | 0.5441 |
| OLIGO_09327 | BF039111 | CDKN1A    | 0.406   | 0.2559 | 0.2776  | 0.4198 |
| OLIGO_04687 | BF039112 | C14orf1   | -0.3089 | 0.5506 | -0.2475 | 0.618  |
| OLIGO_04691 | BF039118 | MRPL48    | 0.3243  | 0.3803 | 0.4042  | 0.2851 |
| OLIGO_09550 | BF039125 | LOC505995 | 0.3816  | 0.3175 | 0.6452  | 0.0783 |
| OLIGO_04704 | BF039131 | CAPN6     | -1.6943 | 0.0093 | -1.4125 | 0.0234 |
| OLIGO_04700 | BF039138 | PPP1R3C   | 1.0853  | 0.0534 | 0.7372  | 0.1509 |
| OLIGO_04698 | BF039148 | PLA2R1    | 0.1142  | 0.7737 | -0.3367 | 0.3769 |
| OLIGO_04195 | BF039154 | STRN4     | -0.1681 | 0.7256 | -0.1969 | 0.6669 |
| OLIGO_04197 | BF039158 | TTC7B     | -0.0237 | 0.9607 | 0.1448  | 0.7531 |
| OLIGO_09382 | BF039162 | PSMB6     | 0.1109  | 0.7241 | -0.1276 | 0.6772 |
| OLIGO_11318 | BF039163 | MMP2      | -2.5778 | 0.0383 | -0.6688 | 0.538  |
| OLIGO_07702 | BF039164 | PARD3     | 0.4358  | 0.2159 | 0.113   | 0.7377 |
| OLIGO_08735 | BF039167 | NDUFA7    | -0.0315 | 0.9265 | -0.0568 | 0.8618 |
| OLIGO_10145 | BF039168 | UQCRQ     | 0.0879  | 0.72   | -0.0075 | 0.9745 |
| OLIGO_07093 | BF039172 | SUPT5H    | 0.1182  | 0.8636 | 0.2124  | 0.7472 |
| OLIGO_04193 | BF039185 | PRKRIR    | 0.1311  | 0.6618 | 0.2651  | 0.378  |
| OLIGO_01505 | BF039186 | GPRC5C    | 0.3452  | 0.2978 | 0.2407  | 0.4448 |
| OLIGO_04189 | BF039189 | SH2BP1    | 0.1048  | 0.7202 | 0.3278  | 0.2418 |
| OLIGO_04190 | BF039191 | GRP       | -0.0139 | 0.9742 | -0.136  | 0.7412 |
| OLIGO_10990 | BF039192 | ANXA6     | -0.0285 | 0.9744 | 0.085   | 0.9204 |
| OLIGO_07439 | BF039193 | NEB       | 1.3962  | 0.047  | 0.4502  | 0.4707 |
| OLIGO_09532 | BF039195 | LOC614309 | -0.5979 | 0.4099 | -0.7774 | 0.2798 |
| OLIGO_04201 | BF039197 | TRIM71    | 0.4596  | 0.2711 | 0.1972  | 0.6237 |
| OLIGO_08999 | BF039199 | FOXK2     | 0.0502  | 0.8803 | 0.2297  | 0.472  |
| OLIGO_04462 | BF039204 | LOC530874 | -0.2943 | 0.5617 | -0.0733 | 0.8801 |
| OLIGO_08766 | BF039213 | NUDT4     | -0.0945 | 0.7802 | 0.0338  | 0.9172 |
| OLIGO_04620 | BF039216 | DEGS1     | 0.0595  | 0.8684 | 0.2309  | 0.5026 |
| OLIGO_04625 | BF039218 | C17orf79  | 0.1415  | 0.543  | 0.0684  | 0.759  |
| OLIGO_04623 | BF039220 | LOC345222 | -0.2956 | 0.5041 | 0.0486  | 0.9035 |
| OLIGO_04624 | BF039221 | IGFBP4    | -0.1829 | 0.6678 | -0.1535 | 0.7072 |
| OLIGO_04613 | BF039233 | LRP2      | -0.3299 | 0.7776 | -0.0339 | 0.9765 |
| OLIGO_09290 | BF039237 | PLP2      | 1.0572  | 0.0086 | 1.1168  | 0.0038 |
| OLIGO_04617 | BF039240 | EP400     | -0.0472 | 0.8633 | 0.0169  | 0.9495 |
| OLIGO_04618 | BF039241 | ASGR2     | -0.118  | 0.8494 | -0.024  | 0.9684 |
| OLIGO_04615 | BF039248 | SH2B      | 0.1323  | 0.7182 | -0.0063 | 0.9858 |
| OLIGO_06729 | BF039250 | PHPT1     | 0.6011  | 0.1544 | 0.5049  | 0.2121 |
| OLIGO_04619 | BF039256 | MAGI3     | -0.9382 | 0.0348 | -0.1329 | 0.7532 |
| OLIGO_07322 | BF039258 | FN3KRP    | -0.3324 | 0.2102 | -0.1215 | 0.632  |

|             |          |           |         |        |         |        |
|-------------|----------|-----------|---------|--------|---------|--------|
| OLIGO_04614 | BF039268 | KLHL18    | -0.0355 | 0.903  | -0.2149 | 0.4413 |
| OLIGO_04622 | BF039269 | KIAA0274  | 0.4021  | 0.4787 | 0.1106  | 0.8419 |
| OLIGO_04703 | BF039272 | ZNF710    | 0.6612  | 0.0159 | -0.1305 | 0.6176 |
| OLIGO_09551 | BF039277 | SLC19A1   | 0.0035  | 0.9912 | 0.1808  | 0.5523 |
| OLIGO_09904 | BF039286 | AIF1      | -0.9522 | 0.1743 | -0.3836 | 0.5677 |
| OLIGO_09500 | BF039303 | NDST2     | -0.8906 | 0.0205 | -0.508  | 0.1691 |
| OLIGO_05059 | BF039310 | MAML2     | -0.0475 | 0.8971 | -0.0294 | 0.9335 |
| OLIGO_05060 | BF039311 | TFDP2     | -0.0932 | 0.8221 | -0.307  | 0.4362 |
| OLIGO_02600 | BF039312 | TFDP1     | 0.5144  | 0.33   | -0.3399 | 0.502  |
| OLIGO_07201 | BF039322 | ZBTB8OS   | -0.4326 | 0.2107 | -0.03   | 0.9281 |
| OLIGO_04209 | BF039324 | TNFRSF1B  | 0.6129  | 0.2496 | 0.3078  | 0.5446 |
| OLIGO_04211 | BF039325 | DNAJC3    | 0.5132  | 0.2562 | 0.0919  | 0.8318 |
| OLIGO_04215 | BF039326 | C15orf26  | -0.88   | 0.1661 | -0.3769 | 0.4963 |
| OLIGO_04214 | BF039329 | KCNN4     | -1.775  | 0.0051 | -0.8244 | 0.172  |
| OLIGO_11382 | BF039331 | SPARC     | -2.0047 | 0      | -0.7867 | 0.0874 |
| OLIGO_04202 | BF039345 | USP16     | -1.324  | 0.0086 | -0.783  | 0.1035 |
| OLIGO_04205 | BF039356 | C14orf153 | 0.2439  | 0.5223 | 0.5288  | 0.1483 |
| OLIGO_11490 | BF039357 | MAN1B1    | -0.1727 | 0.6844 | -0.1182 | 0.7761 |
| OLIGO_04206 | BF039358 | MYCBP2    | 0.8182  | 0.0582 | 0.1878  | 0.6126 |
| OLIGO_04217 | BF039361 | PPAN      | 0.2008  | 0.6288 | 0.3886  | 0.3619 |
| OLIGO_05115 | BF039365 | LOC614166 | -0.9109 | 0.0494 | -0.0875 | 0.8424 |
| OLIGO_08214 | BF039367 | KHDRBS3   | 0.6522  | 0.211  | 0.1233  | 0.8051 |
| OLIGO_07785 | BF039373 | LMCD1     | -0.0481 | 0.9206 | -0.0033 | 0.9943 |
| OLIGO_07049 | BF039382 | COX8A     | -0.0102 | 0.9726 | 0.5385  | 0.0595 |
| OLIGO_04204 | BF039383 | TMPO      | 0.631   | 0.2001 | 0.6971  | 0.1439 |
| OLIGO_09001 | BF039384 | ENG       | -0.9648 | 0.0556 | -0.3433 | 0.4748 |
| OLIGO_08745 | BF039386 | COG2      | -0.3119 | 0.2129 | -0.2222 | 0.3529 |
| OLIGO_04626 | BF039392 | FBXO25    | 0.5483  | 0.3653 | 0.1973  | 0.7366 |
| OLIGO_08095 | BF039394 | DGKH      | -0.1773 | 0.7096 | 0.1396  | 0.7597 |
| OLIGO_04621 | BF039395 | HECTD3    | -0.3284 | 0.2843 | -0.4061 | 0.1658 |
| OLIGO_09218 | BF039404 | RSAD2     | 0.4498  | 0.472  | -0.6042 | 0.3242 |
| OLIGO_04560 | BF039410 | RUSC1     | 0.3064  | 0.2392 | 0.4163  | 0.0956 |
| OLIGO_10504 | BF039421 | IRS1      | -0.2662 | 0.2745 | -0.1552 | 0.5052 |
| OLIGO_10864 | BF039426 | PARP14    | 0.2466  | 0.5319 | -0.1711 | 0.6504 |
| OLIGO_09503 | BF039432 | SCAP2     | -0.1466 | 0.6671 | -0.0564 | 0.8629 |
| OLIGO_05052 | BF039435 | PRKCG     | 0.0693  | 0.8257 | -0.3853 | 0.2021 |
| OLIGO_05053 | BF039440 | WDR71     | -0.4012 | 0.2695 | -0.0847 | 0.8088 |
| OLIGO_05056 | BF039443 | PLEKHH1   | 0.3691  | 0.4655 | 0.2828  | 0.5643 |
| OLIGO_05057 | BF039448 | Zkscan1   | 0.0698  | 0.8    | 0.2272  | 0.3937 |
| OLIGO_09501 | BF039456 | RPS24     | -0.2281 | 0.723  | -0.799  | 0.2027 |
| OLIGO_05046 | BF039460 | TRIP4     | 0.4615  | 0.0348 | 0.2096  | 0.3164 |
| OLIGO_11607 | BF039462 | GART      | -0.2835 | 0.4714 | 0.375   | 0.3248 |
| OLIGO_08723 | BF039466 | UNG2      | 0.7609  | 0.1092 | -0.1965 | 0.6719 |
| OLIGO_05049 | BF039468 | RASL11A   | -0.341  | 0.6407 | -0.2662 | 0.7097 |
| OLIGO_05050 | BF039470 | MCCC1     | -0.6191 | 0.0834 | 0.1193  | 0.7273 |
| OLIGO_05047 | BF039474 | ACVR2B    | 0.1739  | 0.7266 | -0.1136 | 0.8113 |
| OLIGO_05058 | BF039477 | PRO1580   | -0.3987 | 0.1642 | -0.4892 | 0.0753 |
| OLIGO_05061 | BF039480 | LOC91431  | -0.5334 | 0.1788 | 0.0795  | 0.8344 |
| OLIGO_05062 | BF039483 | DSCAML1   | 0.4352  | 0.5119 | 0.3114  | 0.6318 |
| OLIGO_05054 | BF039493 | NY-SAR-48 | -0.4373 | 0.1315 | 0.044   | 0.8725 |
| OLIGO_04140 | BF039496 | CNOT3     | 0.1267  | 0.6469 | -0.1095 | 0.6779 |
| OLIGO_04139 | BF039501 | LOC653890 | 0.3623  | 0.4096 | 0.4551  | 0.2824 |
| OLIGO_08945 | BF039503 | CCRK      | 0.0707  | 0.8754 | -0.1098 | 0.8032 |
| OLIGO_04130 | BF039515 | ANKRD28   | 0.1254  | 0.6374 | -0.1429 | 0.5749 |
| OLIGO_03019 | BF039518 | VAPB      | 0.849   | 0.0128 | 0.4897  | 0.1335 |

|             |          |           |         |        |         |        |
|-------------|----------|-----------|---------|--------|---------|--------|
| OLIGO_08008 | BF039520 | ZA20D2    | 0.5822  | 0.1217 | 0.5062  | 0.1601 |
| OLIGO_05091 | BF039521 | ACTN1     | 0.2556  | 0.5034 | 0.1927  | 0.5987 |
| OLIGO_08940 | BF039523 | MGC137245 | 0.6691  | 0.1494 | 0.2292  | 0.5737 |
| OLIGO_08202 | BF039526 | SCNM1     | 0.3456  | 0.5014 | 0.2182  | 0.6579 |
| OLIGO_04131 | BF039528 | LEMD3     | 0.6851  | 0.0249 | 0.3991  | 0.1722 |
| OLIGO_04132 | BF039529 | PCBP2     | 0.127   | 0.6411 | -0.1319 | 0.6135 |
| OLIGO_04133 | BF039530 | CCDC22    | 0.321   | 0.3416 | -0.0651 | 0.8402 |
| OLIGO_04134 | BF039531 | ZNF639    | 0.1035  | 0.7686 | 0.2614  | 0.4579 |
| OLIGO_04142 | BF039534 | MFSD3     | 1.0105  | 0.0009 | -0.0836 | 0.7721 |
| OLIGO_04141 | BF039535 | SLC30A1   | -0.3737 | 0.3588 | -1.0835 | 0.0057 |
| OLIGO_11476 | BF039538 | ABCA5     | 0.2306  | 0.3805 | 0.1386  | 0.5824 |
| OLIGO_06925 | BF039548 | NUP205    | 0.0867  | 0.7725 | -0.014  | 0.9612 |
| OLIGO_04136 | BF039550 | CHRD1     | -0.6625 | 0.3101 | -0.6839 | 0.2745 |
| OLIGO_08939 | BF039553 | APOA1BP   | 0.4154  | 0.0983 | 0.4449  | 0.0642 |
| OLIGO_08705 | BF039557 | CYP3A4    | -0.1079 | 0.8519 | -0.493  | 0.3968 |
| OLIGO_08899 | BF039559 | CD300A    | 0.4707  | 0.5841 | 0.2718  | 0.7481 |
| OLIGO_10924 | BF039568 | GOLGA4    | -0.4141 | 0.2293 | -0.1067 | 0.7451 |
| OLIGO_01400 | BF039578 | COPZ1     | -0.0735 | 0.7482 | 0.1943  | 0.3756 |
| OLIGO_07027 | BF039581 | LOC644799 | 0.6401  | 0.0296 | 0.517   | 0.0666 |
| OLIGO_04557 | BF039583 | IFT88     | -0.2728 | 0.5001 | -0.5836 | 0.1329 |
| OLIGO_04480 | BF039590 | KIAA1542  | -0.1838 | 0.6552 | 0.0277  | 0.9441 |
| OLIGO_04482 | BF039592 | Traf3     | -0.0733 | 0.8028 | -0.1764 | 0.5308 |
| OLIGO_05124 | BF039593 | LOC509536 | 0.6544  | 0.0231 | 0.4687  | 0.0878 |
| OLIGO_04983 | BF039601 | PEX5      | 0.1945  | 0.671  | -0.2019 | 0.6557 |
| OLIGO_11097 | BF039606 | MAD2L1    | -1.1449 | 0.0488 | -0.3415 | 0.539  |
| OLIGO_11419 | BF039614 | MYO1D     | 0.1996  | 0.4474 | 0.2669  | 0.2905 |
| OLIGO_00196 | BF039617 | BLOC1S2   | 0.69    | 0.1218 | 0.8093  | 0.0585 |
| OLIGO_04985 | BF039623 | LOC653532 | -0.5287 | 0.1778 | -0.1902 | 0.6129 |
| OLIGO_09463 | BF039630 | MGC137693 | -0.0053 | 0.9829 | -0.0667 | 0.7791 |
| OLIGO_04986 | BF039637 | MAP2K6    | 0.5656  | 0.2422 | 0.1728  | 0.7141 |
| OLIGO_04987 | BF039639 | SCARB1    | 0.531   | 0.4578 | 0.6942  | 0.3114 |
| OLIGO_04988 | BF039643 | TEAD1     | -0.3811 | 0.3627 | -0.1366 | 0.7336 |
| OLIGO_09028 | BF039645 | ZDHHC23   | -0.2631 | 0.3795 | -0.2457 | 0.391  |
| OLIGO_11468 | BF039648 | BBX       | -0.3116 | 0.3924 | -0.1417 | 0.6848 |
| OLIGO_09466 | BF039653 | GTF2A2    | 0.5969  | 0.2509 | 0.9545  | 0.1322 |
| OLIGO_04981 | BF039660 | DVL3      | 0.0032  | 0.993  | 0.3275  | 0.3442 |
| OLIGO_04980 | BF039661 | SRM       | -0.3461 | 0.7028 | -0.2593 | 0.7718 |
| OLIGO_03462 | BF039666 | CDC42EP2  | -0.0871 | 0.9228 | -0.1964 | 0.8251 |
| OLIGO_09183 | BF039667 | GCM1      | -1.5139 | 0.2374 | -0.4906 | 0.6884 |
| OLIGO_07173 | BF039677 | PSMD7     | 0.0696  | 0.8053 | -0.1491 | 0.5809 |
| OLIGO_04162 | BF039681 | PTK2      | 0.146   | 0.7588 | 0.3785  | 0.4065 |
| OLIGO_10600 | BF039685 | HSPE1     | -1.8366 | 0.0183 | -0.8098 | 0.2745 |
| OLIGO_06494 | BF039686 | WIPI2     | -0.7497 | 0.0281 | -0.4542 | 0.1645 |
| OLIGO_06495 | BF039689 | DNAJB11   | -0.5308 | 0.0972 | -0.3947 | 0.1967 |
| OLIGO_11306 | BF039691 | MCFD2     | -0.2537 | 0.4864 | -0.1473 | 0.6721 |
| OLIGO_04091 | BF039697 | IFNAR2    | 0.3402  | 0.4548 | 0.0696  | 0.8732 |
| OLIGO_06692 | BF039702 | NME2      | 0.5054  | 0.1035 | 0.785   | 0.0081 |
| OLIGO_04086 | BF039704 | CYB561D2  | -0.3586 | 0.6938 | -0.2496 | 0.7806 |
| OLIGO_11269 | BF039705 | LOC506009 | -0.1509 | 0.6423 | -0.084  | 0.7875 |
| OLIGO_04084 | BF039711 | RMND5A    | 0.1103  | 0.7905 | 0.1556  | 0.7032 |
| OLIGO_06497 | BF039715 | LHX6      | 0.3362  | 0.4126 | 0.0274  | 0.9442 |
| OLIGO_08909 | BF039717 | C10orf58  | -1.4492 | 0.0084 | -0.4044 | 0.4426 |
| OLIGO_04492 | BF039718 | ALKBH1    | -0.229  | 0.5369 | 0.1576  | 0.659  |
| OLIGO_04493 | BF039721 | ABHD5     | -0.1239 | 0.7421 | -0.0342 | 0.9241 |
| OLIGO_04487 | BF039724 | DAK       | 0.5268  | 0.1477 | 0.006   | 0.9862 |

|             |          |               |         |        |         |        |
|-------------|----------|---------------|---------|--------|---------|--------|
| OLIGO_04485 | BF039730 | SRP54         | -0.773  | 0.0935 | -0.5067 | 0.2511 |
| OLIGO_04486 | BF039735 | LOC514189     | -0.2843 | 0.7896 | -0.0691 | 0.9475 |
| OLIGO_04491 | BF039737 | SIRT6         | -0.0023 | 0.9924 | -0.2466 | 0.2874 |
| OLIGO_11534 | BF039744 | PPM1A         | -0.7254 | 0.2532 | -0.762  | 0.2153 |
| OLIGO_04490 | BF039750 | CTCF          | 0.4831  | 0.1111 | 0.8351  | 0.0042 |
| OLIGO_09200 | BF039753 | NBL1          | 0.0371  | 0.9067 | -0.0023 | 0.994  |
| OLIGO_06511 | BF039771 | NDUFAB1       | 0.3402  | 0.1711 | 0.4344  | 0.0677 |
| OLIGO_09147 | BF039783 | SHMT2         | 0.5172  | 0.1583 | 0.3765  | 0.2837 |
| OLIGO_07068 | BF039787 | KIAA0082      | 0.235   | 0.4104 | -0.0939 | 0.734  |
| OLIGO_04087 | BF039790 | BRWD1         | -0.8865 | 0.0326 | 0.0874  | 0.8257 |
| OLIGO_04089 | BF039791 | PVRL4         | -0.2243 | 0.8183 | -0.3805 | 0.6931 |
| OLIGO_04088 | BF039792 | RAD52         | 0.2462  | 0.349  | 0.0454  | 0.8557 |
| OLIGO_06514 | BF039797 | LIPE          | 0.3058  | 0.4211 | 0.2964  | 0.4182 |
| OLIGO_06484 | BF039800 | SRC           | 0.3911  | 0.4074 | 0.0396  | 0.9303 |
| OLIGO_06483 | BF039801 | EXOSC3        | -0.4282 | 0.3419 | -0.324  | 0.4534 |
| OLIGO_11537 | BF039805 | BCR           | 0.575   | 0.0563 | -0.1827 | 0.5263 |
| OLIGO_11351 | BF039814 | HNRPAB        | 0.3861  | 0.4809 | -0.2786 | 0.5957 |
| OLIGO_04502 | BF039820 | PPM1M         | 0.6687  | 0.2257 | 0.3512  | 0.5038 |
| OLIGO_04499 | BF039822 | TREX1         | 0.0033  | 0.9941 | -0.307  | 0.4861 |
| OLIGO_04501 | BF039826 | PTPN21        | 0.4447  | 0.3801 | 0.52    | 0.3292 |
| OLIGO_11633 | BF039828 | LOC511619     | -0.9872 | 0.0075 | -0.8137 | 0.0217 |
| OLIGO_04489 | BF039834 | PCM1          | 0.453   | 0.4385 | 0.8273  | 0.1613 |
| OLIGO_04994 | BF039838 | KIAA0232      | 0.0246  | 0.9706 | -0.461  | 0.4727 |
| OLIGO_04995 | BF039840 | Rps6kc1       | -0.3219 | 0.465  | -0.2887 | 0.4917 |
| OLIGO_04488 | BF039843 | ISGF3G        | 0.8127  | 0.1249 | 0.2734  | 0.5898 |
| OLIGO_09212 | BF039847 | HBP1          | -0.6022 | 0.193  | -0.2831 | 0.523  |
| OLIGO_07114 | BF039861 | DONSON        | 0.0117  | 0.9669 | 0.2248  | 0.4049 |
| OLIGO_07174 | BF039863 | CDCA8         | -0.1094 | 0.7778 | 0.4511  | 0.3091 |
| OLIGO_06633 | BF039865 | TALDO1        | 0.3495  | 0.3424 | 0.0478  | 0.8884 |
| OLIGO_04990 | BF039867 | BRD9          | 0.0048  | 0.9923 | -0.5899 | 0.2261 |
| OLIGO_11579 | BF039869 | MCOLN1        | -0.0038 | 0.9964 | -0.0805 | 0.9199 |
| OLIGO_04991 | BF039871 | 2310008H09Rik | -0.2018 | 0.5631 | -0.7688 | 0.0823 |
| OLIGO_00357 | BF039874 | PTGFRN        | -0.8235 | 0.0218 | -0.4329 | 0.2054 |
| OLIGO_09470 | BF039875 | IMP4          | 0.1868  | 0.5588 | 0.2435  | 0.4493 |
| OLIGO_08810 | BF039876 | FLNA          | 0.7237  | 0.2021 | 0.7165  | 0.1878 |
| OLIGO_04996 | BF039883 | THEM4         | -0.1476 | 0.6847 | -0.1489 | 0.6674 |
| OLIGO_11634 | BF039890 | VDAC1         | 0.6194  | 0.1123 | 0.3983  | 0.2866 |
| OLIGO_01750 | BF039895 | Fbxw17        | 0.338   | 0.447  | -0.0853 | 0.8413 |
| OLIGO_04989 | BF039900 | REEP5         | 0.8994  | 0.016  | 0.8359  | 0.0196 |
| OLIGO_10065 | BF039906 | MGC12966      | -0.2626 | 0.6537 | -0.7838 | 0.1696 |
| OLIGO_04505 | BF039909 | C10orf56      | 0.054   | 0.9007 | 0.026   | 0.9509 |
| OLIGO_08277 | BF039915 | HDAC5         | -0.4863 | 0.1833 | -0.5912 | 0.0917 |
| OLIGO_09116 | BF039921 | COX7A2        | 0.3336  | 0.4582 | 0.4559  | 0.2907 |
| OLIGO_08054 | BF039924 | ING4          | 0.0957  | 0.8093 | -0.2137 | 0.5853 |
| OLIGO_04495 | BF039936 | LOC653206     | 0.1795  | 0.6868 | -0.1764 | 0.678  |
| OLIGO_04497 | BF039945 | DHTKD1        | 0.6199  | 0.2979 | 0.2781  | 0.6247 |
| OLIGO_04498 | BF039946 | C14orf150     | 0.1632  | 0.6701 | -0.2071 | 0.5729 |
| OLIGO_09214 | BF039948 | IK            | -0.2053 | 0.6571 | -0.0601 | 0.891  |
| OLIGO_07140 | BF039949 | ATPIF1        | 0.4034  | 0.2172 | 0.374   | 0.2314 |
| OLIGO_04503 | BF039950 | E2F6          | 0.3629  | 0.4323 | 0.338   | 0.454  |
| OLIGO_04992 | BF039961 | C14orf169     | 0.2364  | 0.4282 | -0.4359 | 0.1281 |
| OLIGO_09398 | BF039964 | FLJ10404      | 0.2764  | 0.4454 | -0.1741 | 0.6161 |
| OLIGO_09474 | BF039965 | RENBP         | 0.3961  | 0.3897 | 0.0926  | 0.8338 |
| OLIGO_09387 | BF039977 | TRAM1         | 0.5992  | 0.0516 | 0.5585  | 0.0585 |
| OLIGO_04924 | BF039978 | C7orf23       | -0.1476 | 0.7444 | 0.0859  | 0.8431 |

|             |          |               |         |        |         |        |
|-------------|----------|---------------|---------|--------|---------|--------|
| OLIGO_04926 | BF039979 | HIST1H3D      | -0.0485 | 0.9068 | 0.0698  | 0.8601 |
| OLIGO_04927 | BF039994 | HKDC1         | -0.0154 | 0.9569 | 0.1865  | 0.4945 |
| OLIGO_09083 | BF039997 | PCSK7         | -0.374  | 0.4412 | -0.1346 | 0.7724 |
| OLIGO_07280 | BF040000 | APEX1         | 1.1465  | 0.0022 | 0.6694  | 0.0608 |
| OLIGO_08788 | BF040001 | SLC35E1       | -0.289  | 0.2932 | -0.1481 | 0.5742 |
| OLIGO_04923 | BF040002 | CSF1R         | 0.3493  | 0.7036 | 0.0599  | 0.947  |
| OLIGO_06592 | BF040003 | IARS2         | 0.0415  | 0.8525 | -0.1309 | 0.541  |
| OLIGO_06393 | BF040008 | QRSL1         | 0.1249  | 0.6511 | 0.2773  | 0.3297 |
| OLIGO_06394 | BF040011 | TRIB3         | 0.5256  | 0.1678 | 0.385   | 0.2918 |
| OLIGO_04065 | BF040014 | RAB18         | -0.025  | 0.9393 | 0.0304  | 0.9229 |
| OLIGO_06388 | BF040016 | GGPS1         | 0.526   | 0.2378 | 0.3355  | 0.4221 |
| OLIGO_04066 | BF040020 | LOC653397     | -0.552  | 0.193  | -0.3476 | 0.3923 |
| OLIGO_07973 | BF040027 | EBNA1BP2      | -0.1082 | 0.7292 | -0.1831 | 0.5397 |
| OLIGO_10889 | BF040029 | LOC389541     | 0.224   | 0.5209 | 0.2385  | 0.4759 |
| OLIGO_08175 | BF040043 | LOC532359     | 0.1849  | 0.6239 | 0.3017  | 0.4022 |
| OLIGO_06380 | BF040045 | TMEM16J       | -0.8395 | 0.049  | -0.3759 | 0.357  |
| OLIGO_06409 | BF040051 | JTV1          | -0.7581 | 0.1141 | 0.0763  | 0.8655 |
| OLIGO_11452 | BF040052 | TIPARP        | 0.3428  | 0.3433 | 0.2231  | 0.517  |
| OLIGO_11076 | BF040053 | KIF21B        | -1.1601 | 0.2642 | -0.9208 | 0.3457 |
| OLIGO_04068 | BF040056 | SLC37A3       | -0.8945 | 0.0748 | -0.7431 | 0.1219 |
| OLIGO_06395 | BF040059 | ITGB1BP1      | 0.2445  | 0.3864 | 0.1703  | 0.5276 |
| OLIGO_04064 | BF040063 | PHLPPL        | -0.5108 | 0.2063 | -0.4034 | 0.2976 |
| OLIGO_06401 | BF040065 | CD109         | 0.8441  | 0.0976 | 1.0451  | 0.0528 |
| OLIGO_06414 | BF040066 | NFATC3        | 0.414   | 0.3901 | 1.007   | 0.0296 |
| OLIGO_08730 | BF040069 | EFNA1         | 0.2203  | 0.5923 | -0.2838 | 0.47   |
| OLIGO_09155 | BF040070 | SYVN1         | 1.0647  | 0.0002 | 0.6173  | 0.0256 |
| OLIGO_04430 | BF040076 | RIPK3         | 0.1753  | 0.694  | -0.1597 | 0.7075 |
| OLIGO_04436 | BF040079 | LOC650188     | -0.1425 | 0.5794 | -0.0124 | 0.96   |
| OLIGO_09159 | BF040081 | C11orf59      | 0.2921  | 0.5718 | 0.1702  | 0.7311 |
| OLIGO_09017 | BF040085 | KSR1          | -0.2709 | 0.4242 | -0.2619 | 0.4188 |
| OLIGO_09223 | BF040091 | RBM16         | -0.2439 | 0.3724 | 0.0016  | 0.9953 |
| OLIGO_04425 | BF040094 | PES1          | -0.0616 | 0.889  | 0.2541  | 0.5483 |
| OLIGO_08758 | BF040104 | 4932441K18Rik | -0.0827 | 0.8421 | -0.0372 | 0.9255 |
| OLIGO_04426 | BF040107 | DPP3          | -0.3466 | 0.1729 | 0.1097  | 0.6508 |
| OLIGO_11519 | BF040109 | TAF6L         | 0.7745  | 0.1761 | 0.4365  | 0.4262 |
| OLIGO_04438 | BF040115 | RPUSD2        | 0.0232  | 0.9434 | 0.1875  | 0.5488 |
| OLIGO_04428 | BF040119 | LATS2         | 0.669   | 0.0487 | -0.0501 | 0.8773 |
| OLIGO_09157 | BF040122 | PNPLA2        | -0.6843 | 0.1524 | -0.0036 | 0.9929 |
| OLIGO_09158 | BF040123 | BCAS2         | -0.8375 | 0.0867 | -0.0839 | 0.8576 |
| OLIGO_04434 | BF040124 | CXorf17       | 0.1649  | 0.6001 | 0.2492  | 0.4111 |
| OLIGO_04433 | BF040125 | DLK1          | -0.3422 | 0.6572 | -0.2535 | 0.7372 |
| OLIGO_04929 | BF040134 | EDG1          | 0.7518  | 0.2195 | 0.4346  | 0.4588 |
| OLIGO_09105 | BF040142 | ITGB4         | -0.4724 | 0.4285 | 0.0728  | 0.8987 |
| OLIGO_11324 | BF040147 | GALK1         | -0.3568 | 0.2298 | -0.3133 | 0.2714 |
| OLIGO_09910 | BF040148 | NPLOC4        | -0.1308 | 0.7364 | -0.1396 | 0.7078 |
| OLIGO_03928 | BF040152 | USP9X         | -0.2218 | 0.6833 | 0.0007  | 0.999  |
| OLIGO_08879 | BF040171 | ABHD2         | 0.5222  | 0.3543 | 0.2777  | 0.6058 |
| OLIGO_04071 | BF040173 | Ankrd13b      | -0.0172 | 0.9842 | 0.2664  | 0.7516 |
| OLIGO_10574 | BF040174 | ORC6L         | 0.0597  | 0.9015 | -0.4112 | 0.3744 |
| OLIGO_06442 | BF040175 | TOM1          | -0.2869 | 0.3546 | -0.2626 | 0.3768 |
| OLIGO_10857 | BF040177 | BAG1          | -0.2339 | 0.5308 | -0.2662 | 0.4685 |
| OLIGO_06792 | BF040179 | KPNA2         | 0.7587  | 0.034  | 0.2359  | 0.4907 |
| OLIGO_05090 | BF040183 | CTAGE5        | -0.1119 | 0.836  | -0.342  | 0.5234 |
| OLIGO_06469 | BF040187 | TFE3          | 0.2157  | 0.4226 | 0.4001  | 0.1206 |
| OLIGO_06468 | BF040192 | ZMAT1         | 0.7396  | 0.2322 | 0.7069  | 0.2336 |



|             |          |           |         |        |         |        |
|-------------|----------|-----------|---------|--------|---------|--------|
| OLIGO_06459 | BF040198 | ARHGEF16  | -0.4221 | 0.6242 | -0.0327 | 0.9692 |
| OLIGO_11435 | BF040208 | PLEKHA4   | -0.0919 | 0.9092 | -0.2556 | 0.7473 |
| OLIGO_06422 | BF040210 | DAB2      | -2.0151 | 0.0008 | -0.6747 | 0.2384 |
| OLIGO_02716 | BF040215 | TMEM62    | -1.2664 | 0.03   | -0.3987 | 0.4751 |
| OLIGO_06419 | BF040218 | DDX17     | 0.2575  | 0.5278 | 0.0673  | 0.8634 |
| OLIGO_04070 | BF040219 | CSGlcA-T  | 0.0308  | 0.9486 | 0.1372  | 0.7702 |
| OLIGO_06448 | BF040223 | POLR3F    | 0.0171  | 0.9742 | 0.2788  | 0.5855 |
| OLIGO_06446 | BF040225 | SLC37A1   | 0.2527  | 0.4925 | 0.2102  | 0.5535 |
| OLIGO_06436 | BF040226 | ERGIC3    | -0.1864 | 0.5754 | -0.2461 | 0.4392 |
| OLIGO_10984 | BF040230 | ERRFI1    | 0.4507  | 0.3845 | 0.7592  | 0.1251 |
| OLIGO_05089 | BF040233 | FAM20C    | 0.233   | 0.4857 | -0.4039 | 0.2076 |
| OLIGO_06478 | BF040241 | MGC44505  | -0.0449 | 0.9351 | -0.1314 | 0.8082 |
| OLIGO_08910 | BF040243 | PARD6B    | -1.0726 | 0.0923 | -0.5018 | 0.3727 |
| OLIGO_07979 | BF040250 | GPKOW     | -0.9719 | 0.0158 | -0.4789 | 0.2135 |
| OLIGO_04432 | BF040254 | EPB41L3   | -0.0865 | 0.8257 | -0.1564 | 0.6768 |
| OLIGO_07339 | BF040255 | C16orf56  | -0.5954 | 0.1047 | -0.2471 | 0.4821 |
| OLIGO_08773 | BF040257 | CCT4      | -0.7086 | 0.1975 | -0.011  | 0.9833 |
| OLIGO_05628 | BF040259 | CDK2AP2   | 0.7723  | 0.2623 | 0.5681  | 0.3896 |
| OLIGO_04431 | BF040261 | TIMM9     | -0.0092 | 0.9809 | -0.2953 | 0.4236 |
| OLIGO_11126 | BF040263 | UBE2C     | 0.5999  | 0.0735 | 0.0185  | 0.9537 |
| OLIGO_04372 | BF040266 | FLJ34048  | 0.1215  | 0.7783 | 0.1401  | 0.7361 |
| OLIGO_04366 | BF040271 | DUSP4     | -0.2238 | 0.3939 | -0.1122 | 0.655  |
| OLIGO_07239 | BF040273 | PDE9A     | 0.3358  | 0.3555 | -0.0201 | 0.9518 |
| OLIGO_04867 | BF040281 | RAP1B     | 0.4056  | 0.5508 | 0.3573  | 0.5879 |
| OLIGO_11582 | BF040286 | WNT10B    | 0.035   | 0.9478 | -0.3107 | 0.5564 |
| OLIGO_09411 | BF040287 | PIAS2     | 0.1582  | 0.64   | 0.0792  | 0.8079 |
| OLIGO_09554 | BF040297 | LOC540159 | 0.2594  | 0.3159 | 0.3037  | 0.2192 |
| OLIGO_04870 | BF040300 | HMGB1     | 0.233   | 0.611  | 0.3946  | 0.3715 |
| OLIGO_07553 | BF040303 | FBXO18    | 0.0737  | 0.8457 | 0.4687  | 0.1963 |
| OLIGO_04863 | BF040310 | LSM14B    | 0.5781  | 0.2297 | 0.3119  | 0.4989 |
| OLIGO_04864 | BF040314 | GRPEL1    | 0.3046  | 0.2887 | 0.0989  | 0.7193 |
| OLIGO_09409 | BF040320 | C1RL      | 0.8254  | 0.0219 | -0.0524 | 0.8787 |
| OLIGO_05613 | BF040321 | PPT2      | -0.4587 | 0.0616 | -0.3033 | 0.1957 |
| OLIGO_08707 | BF040324 | LOC441150 | 0.2292  | 0.5909 | 0.1546  | 0.7053 |
| OLIGO_09407 | BF040328 | HAVCR1    | -1.5933 | 0.036  | -1.4744 | 0.043  |
| OLIGO_04871 | BF040336 | SCRN1     | 1.259   | 0.001  | 0.946   | 0.0099 |
| OLIGO_04869 | BF040347 | SNX24     | -0.0992 | 0.8967 | -0.3756 | 0.6099 |
| OLIGO_04861 | BF040351 | SGEF      | -0.5472 | 0.0838 | -0.2544 | 0.4026 |
| OLIGO_04860 | BF040353 | RCOR1     | 0.0642  | 0.8352 | 0.554   | 0.0627 |
| OLIGO_08806 | BF040363 | SRP19     | 0.2453  | 0.5453 | -0.0195 | 0.9599 |
| OLIGO_04041 | BF040365 | OACT1     | -0.5668 | 0.3356 | -0.002  | 0.9971 |
| OLIGO_04037 | BF040372 | UBOX5     | -0.0947 | 0.8113 | -0.2329 | 0.5402 |
| OLIGO_07250 | BF040380 | SSU72     | 0.1887  | 0.5854 | 0.1043  | 0.753  |
| OLIGO_08814 | BF040383 | GLO1      | 0.447   | 0.2274 | 0.0453  | 0.8984 |
| OLIGO_04040 | BF040384 | TMEM34    | -0.0557 | 0.8587 | -0.0078 | 0.9793 |
| OLIGO_07534 | BF040392 | AZI2      | -0.193  | 0.4742 | -0.0839 | 0.7479 |
| OLIGO_04038 | BF040395 | C10orf104 | 0.2505  | 0.5301 | 0.0652  | 0.8639 |
| OLIGO_07486 | BF040398 | BTBD6     | -0.0565 | 0.903  | 0.2687  | 0.5455 |
| OLIGO_09125 | BF040403 | LOC506282 | -0.1218 | 0.8182 | -0.2393 | 0.6365 |
| OLIGO_07314 | BF040412 | ABHD14B   | 0.1647  | 0.5589 | 0.0492  | 0.8554 |
| OLIGO_07212 | BF040414 | CHP       | 0.0135  | 0.9623 | -0.007  | 0.9794 |
| OLIGO_04374 | BF040423 | MEIS2     | -0.9034 | 0.0139 | -0.568  | 0.1056 |
| OLIGO_10931 | BF040430 | MGC134358 | 1.151   | 0.1724 | 0.7705  | 0.3405 |
| OLIGO_07342 | BF040432 | CCT8      | 0.6498  | 0.1356 | -0.0226 | 0.9568 |
| OLIGO_04365 | BF040436 | TUBGCP3   | 0.6468  | 0.0259 | 0.207   | 0.4546 |

|             |          |           |         |        |         |        |
|-------------|----------|-----------|---------|--------|---------|--------|
| OLIGO_04368 | BF040439 | ACTR8     | 0.1824  | 0.5527 | 0.4652  | 0.1165 |
| OLIGO_04367 | BF040440 | CASP7     | -0.0396 | 0.9315 | 0.1927  | 0.6655 |
| OLIGO_04370 | BF040441 | SLC30A4   | -0.8726 | 0.1964 | -0.0175 | 0.9767 |
| OLIGO_04369 | BF040442 | NRF1      | -0.1057 | 0.8067 | 0.3146  | 0.4698 |
| OLIGO_10888 | BF040446 | CD59      | 1.1501  | 0.0127 | 0.4071  | 0.3578 |
| OLIGO_00892 | BF040453 | SPTAN1    | 0.622   | 0.088  | 0.358   | 0.3051 |
| OLIGO_09378 | BF040454 | NBLA00301 | 0.8811  | 0.044  | 0.4758  | 0.256  |
| OLIGO_04789 | BF040456 | ADRB2     | -0.2012 | 0.7771 | -0.1739 | 0.8032 |
| OLIGO_09251 | BF040463 | LNx2      | -0.2713 | 0.3167 | 0.0909  | 0.7256 |
| OLIGO_04781 | BF040469 | HIPK3     | 0.684   | 0.2136 | 0.2878  | 0.5572 |
| OLIGO_04783 | BF040472 | FAM98A    | -0.3503 | 0.3149 | -0.8678 | 0.0091 |
| OLIGO_00444 | BF040479 | LDB1      | -0.1126 | 0.6407 | 0.1426  | 0.5376 |
| OLIGO_09381 | BF040483 | LOC510177 | 0.072   | 0.7935 | -0.4232 | 0.1088 |
| OLIGO_04792 | BF040487 | CES2      | 0.5172  | 0.2213 | 0.1919  | 0.6367 |
| OLIGO_04790 | BF040497 | SNAPC1    | 1.8605  | 0.0023 | 1.2309  | 0.0345 |
| OLIGO_08997 | BF040504 | ZMYND11   | 0.7479  | 0.0229 | 0.5605  | 0.0745 |
| OLIGO_06384 | BF040508 | YTHDC2    | 0.1067  | 0.7561 | 0.444   | 0.1779 |
| OLIGO_06365 | BF040526 | C10orf77  | -0.562  | 0.2457 | -0.4789 | 0.3044 |
| OLIGO_08805 | BF040529 | CGB7      | -0.3755 | 0.5972 | 0.011   | 0.9873 |
| OLIGO_06360 | BF040532 | ABCA1     | -1.4423 | 0.006  | -0.872  | 0.082  |
| OLIGO_04039 | BF040534 | HTRA2     | 0.2042  | 0.5068 | -0.3872 | 0.1871 |
| OLIGO_08812 | BF040535 | CDC42EP1  | 0.185   | 0.4849 | -0.0392 | 0.877  |
| OLIGO_06937 | BF040539 | MADD      | 0.026   | 0.9437 | -0.1347 | 0.7046 |
| OLIGO_08807 | BF040540 | NTE       | -0.4154 | 0.4179 | -0.5273 | 0.2822 |
| OLIGO_07987 | BF040553 | MFAP2     | -1.4505 | 0.0038 | -0.4698 | 0.3256 |
| OLIGO_04299 | BF040554 | Ddx5      | -0.0606 | 0.8357 | -0.2463 | 0.3801 |
| OLIGO_09074 | BF040558 | DENND1A   | -0.4578 | 0.2195 | -0.1627 | 0.6487 |
| OLIGO_10487 | BF040560 | LOC508632 | -1.1685 | 0.0564 | -0.3461 | 0.5547 |
| OLIGO_04294 | BF040565 | SRGAP1    | 0.3128  | 0.5307 | 0.1152  | 0.8097 |
| OLIGO_09080 | BF040572 | CRELD1    | 0.2653  | 0.3014 | -0.1852 | 0.4438 |
| OLIGO_04297 | BF040573 | ASB9      | -0.2595 | 0.6018 | -0.6361 | 0.1847 |
| OLIGO_08062 | BF040578 | RBM9      | -0.1414 | 0.7403 | 0.1702  | 0.684  |
| OLIGO_10640 | BF040584 | U2AF1     | -0.2153 | 0.6331 | 0.1035  | 0.8126 |
| OLIGO_07477 | BF040587 | ESRRA     | -1.7553 | 0      | -0.607  | 0.0479 |
| OLIGO_09775 | BF040589 | IRF3      | 0.4417  | 0.409  | 0.2539  | 0.6206 |
| OLIGO_09073 | BF040591 | UFC1      | 0.8157  | 0.0948 | 0.6737  | 0.1499 |
| OLIGO_04293 | BF040593 | LOC618210 | -0.5142 | 0.2694 | -0.2541 | 0.5689 |
| OLIGO_08072 | BF040599 | COX5A     | 0.245   | 0.4488 | 0.2051  | 0.5099 |
| OLIGO_09694 | BF040602 | RHOD      | 0.4334  | 0.3913 | 0.0606  | 0.9005 |
| OLIGO_04291 | BF040603 | TEK       | -0.7644 | 0.1615 | -0.5337 | 0.2991 |
| OLIGO_10138 | BF040604 | CCDC84    | 0.3177  | 0.7223 | 0.1006  | 0.909  |
| OLIGO_11503 | BF040606 | R3HDM2    | 0.2051  | 0.5508 | 0.2084  | 0.5267 |
| OLIGO_09079 | BF040613 | LOC513251 | -0.3061 | 0.3226 | -0.4761 | 0.1124 |
| OLIGO_04296 | BF040614 | CPSF1     | 0.6653  | 0.0504 | 0.5766  | 0.0761 |
| OLIGO_09077 | BF040615 | PPP1R13B  | -2.1045 | 0.0183 | -1.2923 | 0.1298 |
| OLIGO_09076 | BF040616 | SALL4     | -2.2281 | 0.0055 | -1.1389 | 0.1379 |
| OLIGO_04292 | BF040621 | FEM1A     | 0.1424  | 0.7154 | 0.1049  | 0.7795 |
| OLIGO_07765 | BF040631 | HSPA4     | -0.0872 | 0.8444 | 0.3244  | 0.4433 |
| OLIGO_04785 | BF040634 | BLZF1     | -0.1172 | 0.8862 | -0.1702 | 0.8331 |
| OLIGO_10854 | BF040637 | MTSS1     | -0.8011 | 0.0388 | -0.1239 | 0.7378 |
| OLIGO_04787 | BF040638 | GAL3ST3   | 2.4822  | 0.0027 | 1.5631  | 0.0481 |
| OLIGO_04791 | BF040641 | CHIC2     | 0.8377  | 0.1018 | 0.1311  | 0.7689 |
| OLIGO_08880 | BF040645 | RALBP1    | -0.2266 | 0.5073 | 0.2557  | 0.4349 |
| OLIGO_00074 | BF040652 | PLEKHC1   | -0.4426 | 0.1542 | -0.2176 | 0.4639 |
| OLIGO_10482 | BF040656 | GANAB     | 0.0587  | 0.8604 | 0.0441  | 0.8901 |

|             |          |               |         |        |         |        |
|-------------|----------|---------------|---------|--------|---------|--------|
| OLIGO_06345 | BF040682 | IFT74         | -0.2814 | 0.4599 | -0.2305 | 0.5275 |
| OLIGO_00648 | BF040688 | TSPAN7        | 2.1543  | 0.0011 | 1.104   | 0.0795 |
| OLIGO_06294 | BF040693 | C12orf52      | 1.0636  | 0.009  | 0.7213  | 0.0625 |
| OLIGO_06314 | BF040700 | FLJ43806      | -0.4468 | 0.3957 | -0.1869 | 0.712  |
| OLIGO_04009 | BF040704 | CD93          | -0.2483 | 0.5414 | -0.0656 | 0.8673 |
| OLIGO_09120 | BF040705 | PSCD1         | 0.6429  | 0.0705 | -0.2507 | 0.4613 |
| OLIGO_06304 | BF040706 | LOC339105     | -0.3567 | 0.5489 | 0.0078  | 0.989  |
| OLIGO_06325 | BF040723 | TBPL1         | 0.0428  | 0.8992 | -0.053  | 0.8723 |
| OLIGO_10424 | BF040726 | FAM32A        | 0.4485  | 0.0883 | 0.8965  | 0.0004 |
| OLIGO_06308 | BF040729 | UBAP2L        | 0.5034  | 0.2401 | 0.5187  | 0.2068 |
| OLIGO_06340 | BF040734 | TIGD2         | -1.5091 | 0.0161 | -0.1676 | 0.7741 |
| OLIGO_08711 | BF040744 | PHYH          | -0.4257 | 0.3548 | -0.6033 | 0.1717 |
| OLIGO_04300 | BF040746 | PER1          | 0.0663  | 0.9331 | 0.0269  | 0.9724 |
| OLIGO_08901 | BF040747 | POLE3         | 0.3022  | 0.4341 | -0.0555 | 0.8809 |
| OLIGO_11504 | BF040750 | CCDC3         | 0.5258  | 0.0909 | 0.5264  | 0.0758 |
| OLIGO_09086 | BF040752 | POLA2         | -0.1912 | 0.7067 | -0.4069 | 0.4038 |
| OLIGO_09087 | BF040753 | MGC127771     | -0.5463 | 0.115  | -0.0361 | 0.9135 |
| OLIGO_09084 | BF040761 | NR2C2         | 0.5178  | 0.1145 | 0.7489  | 0.0179 |
| OLIGO_04307 | BF040764 | AGTRAP        | -0.6732 | 0.2465 | -0.45   | 0.4157 |
| OLIGO_02608 | BF040765 | ELL           | -0.5469 | 0.3935 | -0.1274 | 0.8357 |
| OLIGO_04301 | BF040777 | FAM58A        | 0.4976  | 0.1413 | 0.5275  | 0.117  |
| OLIGO_04800 | BF040784 | BCDIN3        | 0.2892  | 0.3169 | -0.0238 | 0.9316 |
| OLIGO_02326 | BF040786 | LYPLA1        | 0.3898  | 0.4272 | 0.5022  | 0.2862 |
| OLIGO_04799 | BF040787 | STX10         | -0.0863 | 0.7712 | -0.3286 | 0.2488 |
| OLIGO_04798 | BF040790 | AHDC1         | -0.3159 | 0.5098 | -0.6448 | 0.1898 |
| OLIGO_04797 | BF040793 | NKIRAS2       | -0.3347 | 0.3429 | -0.109  | 0.7457 |
| OLIGO_04803 | BF040798 | UBE3A         | 0.5077  | 0.1525 | 0.2871  | 0.3972 |
| OLIGO_04801 | BF040805 | ISOC2         | 0.5059  | 0.0565 | 0.1547  | 0.5412 |
| OLIGO_07694 | BF040808 | ZNFX1         | 0.1148  | 0.744  | 0.095   | 0.7781 |
| OLIGO_04794 | BF040813 | STAM          | 0.4003  | 0.2835 | 0.1831  | 0.6086 |
| OLIGO_08696 | BF040821 | PTDSR         | 0.6306  | 0.0472 | -0.0217 | 0.9433 |
| OLIGO_04796 | BF040826 | NRP2          | -0.7786 | 0.0224 | -0.6403 | 0.0499 |
| OLIGO_08986 | BF040829 | PSMB7         | 0.4057  | 0.4364 | 0.1801  | 0.7185 |
| OLIGO_04805 | BF040834 | LUZP1         | 0.6985  | 0.0142 | 0.2032  | 0.4529 |
| OLIGO_10413 | BF040840 | SLC37A2       | -1.3124 | 0.0994 | -0.3861 | 0.6126 |
| OLIGO_08727 | BF040841 | NRG2          | 0.9587  | 0.1926 | 0.0885  | 0.8991 |
| OLIGO_11321 | BF040847 | FAM3A         | -0.5945 | 0.1204 | -0.1358 | 0.7123 |
| OLIGO_08726 | BF040848 | DC-UbP        | -0.4739 | 0.3042 | -0.8738 | 0.0951 |
| OLIGO_06262 | BF040850 | MITF          | 0.2109  | 0.5126 | -0.0276 | 0.9282 |
| OLIGO_03990 | BF040851 | ALG5          | -0.3855 | 0.1985 | -0.4732 | 0.1    |
| OLIGO_07164 | BF040853 | CST6          | 0.3519  | 0.4137 | 0.3317  | 0.4238 |
| OLIGO_03015 | BF040858 | DNAJC14       | 0.1358  | 0.7522 | -0.2086 | 0.621  |
| OLIGO_06245 | BF040860 | TXN           | 1.0595  | 0.0547 | 1.0214  | 0.0532 |
| OLIGO_06240 | BF040866 | AP1M2         | 0.1462  | 0.7477 | 0.0486  | 0.9113 |
| OLIGO_06239 | BF040867 | TRIM6         | -1.3639 | 0.1047 | -0.5876 | 0.4471 |
| OLIGO_06236 | BF040868 | PLAA          | -0.1687 | 0.7683 | -0.5984 | 0.276  |
| OLIGO_07795 | BF040869 | LGR8          | -0.224  | 0.643  | -0.1649 | 0.7233 |
| OLIGO_07889 | BF040871 | AP2A1         | 0.671   | 0.2181 | 0.4724  | 0.3656 |
| OLIGO_06237 | BF040872 | HIATL1        | 0.7797  | 0.0829 | 0.0379  | 0.9187 |
| OLIGO_06238 | BF040873 | FLJ22662      | -0.3335 | 0.7074 | -0.5166 | 0.5574 |
| OLIGO_06286 | BF040874 | LOC646431     | 0.0662  | 0.9374 | -0.1158 | 0.8889 |
| OLIGO_06912 | BF040878 | EIF4A2        | -0.4522 | 0.3156 | -0.0352 | 0.9351 |
| OLIGO_11538 | BF040891 | RNASEH1       | 0.0212  | 0.9635 | -0.3861 | 0.3918 |
| OLIGO_06287 | BF040897 | LOC617052     | 0.6076  | 0.0047 | 0.2139  | 0.2956 |
| OLIGO_11744 | BF040899 | 5031439G07Rik | 1.1549  | 0.0671 | 0.5085  | 0.3997 |

|             |          |               |         |        |         |        |
|-------------|----------|---------------|---------|--------|---------|--------|
| OLIGO_04308 | BF040906 | CSPG6         | -0.0935 | 0.7609 | -0.3377 | 0.2511 |
| OLIGO_09019 | BF040914 | PTK2B         | 0.3665  | 0.3531 | 0.1748  | 0.644  |
| OLIGO_09032 | BF040917 | TGM1          | -0.309  | 0.6642 | 0.0942  | 0.8902 |
| OLIGO_10880 | BF040923 | VPS28         | 0.6012  | 0.08   | 0.1257  | 0.7021 |
| OLIGO_04304 | BF040925 | LOC508867     | 0.4017  | 0.3459 | 0.0628  | 0.8779 |
| OLIGO_04306 | BF040926 | 4930519N16Rik | 0.0443  | 0.9294 | -0.1216 | 0.796  |
| OLIGO_04305 | BF040927 | FAM107B       | 0.7938  | 0.0129 | 0.1758  | 0.5628 |
| OLIGO_09991 | BF040939 | ASCC1         | -0.1965 | 0.6599 | 0.0176  | 0.9672 |
| OLIGO_11599 | BF040948 | NUDT3         | 0.7466  | 0.0391 | 0.5735  | 0.0981 |
| OLIGO_04742 | BF040950 | DDO           | 0.4773  | 0.2121 | 0.1726  | 0.6376 |
| OLIGO_11562 | BF040962 | SDC2          | -0.4387 | 0.0667 | -0.3407 | 0.1357 |
| OLIGO_09345 | BF040968 | PLDN          | -0.1358 | 0.6322 | -0.0469 | 0.863  |
| OLIGO_10970 | BF040969 | MAPK1         | 0.4585  | 0.487  | 0.4847  | 0.4562 |
| OLIGO_02261 | BF040970 | AGPAT2        | 0.0225  | 0.9419 | 0.0279  | 0.925  |
| OLIGO_09272 | BF040973 | PPP1R11       | -0.0793 | 0.7937 | -0.3862 | 0.187  |
| OLIGO_04738 | BF040980 | MXD4          | -0.2812 | 0.6367 | -0.1685 | 0.7679 |
| OLIGO_11759 | BF040992 | LOC531863     | 0.025   | 0.9409 | 0.0168  | 0.9586 |
| OLIGO_08863 | BF040995 | TMEM121       | 0.2468  | 0.6194 | -0.337  | 0.4793 |
| OLIGO_04741 | BF040997 | NR2F2         | -1.4639 | 0.0679 | -0.759  | 0.3207 |
| OLIGO_06942 | BF041001 | DRAP1         | 0.1006  | 0.7244 | -0.0393 | 0.8858 |
| OLIGO_04739 | BF041010 | SMG7          | -0.352  | 0.3917 | -0.0747 | 0.8496 |
| OLIGO_04732 | BF041013 | RANBP10       | -0.3941 | 0.3685 | -0.2642 | 0.5294 |
| OLIGO_09039 | BF041015 | HUS1          | 0.2115  | 0.4652 | -0.0028 | 0.9917 |
| OLIGO_03363 | BF041031 | PYGB          | 0.7876  | 0.0288 | 0.0953  | 0.7811 |
| OLIGO_04677 | BF041037 | BMP2K         | 0.4468  | 0.1773 | -0.2415 | 0.4488 |
| OLIGO_04664 | BF041041 | C1orf32       | -0.4236 | 0.122  | -0.2369 | 0.3667 |
| OLIGO_04667 | BF041044 | CD200R2       | -0.2372 | 0.5755 | 0.567   | 0.1546 |
| OLIGO_04243 | BF041056 | BAT5          | 0.0572  | 0.8689 | 0.2371  | 0.4754 |
| OLIGO_04242 | BF041062 | FBXO28        | -0.4362 | 0.439  | -0.0644 | 0.905  |
| OLIGO_04245 | BF041076 | STXBP5        | -0.2937 | 0.551  | 0.0097  | 0.9836 |
| OLIGO_12544 | BF041085 | HNRPH2        | 0.278   | 0.605  | 0.6417  | 0.2134 |
| OLIGO_09034 | BF041100 | LOC641705     | -0.4004 | 0.3397 | -0.2816 | 0.4836 |
| OLIGO_09534 | BF041103 | LOC615180     | -0.348  | 0.3348 | -0.1558 | 0.6523 |
| OLIGO_07673 | BF041104 | ZCCHC3        | -0.0808 | 0.7672 | 0.0563  | 0.8311 |
| OLIGO_04248 | BF041110 | STAT5A        | 0.3149  | 0.3681 | 0.1953  | 0.5603 |
| OLIGO_04239 | BF041123 | ADAMDEC1      | -0.8895 | 0.2576 | -1.0113 | 0.1709 |
| OLIGO_04240 | BF041124 | RFX4          | 0.0737  | 0.9012 | -0.5315 | 0.3732 |
| OLIGO_09278 | BF041126 | DNAJC12       | 1.1503  | 0.0873 | 1.288   | 0.046  |
| OLIGO_11465 | BF041127 | AP2A2         | -0.303  | 0.3192 | 0.1391  | 0.6316 |
| OLIGO_09277 | BF041129 | PIM1          | 0.0227  | 0.9491 | 0.0813  | 0.8111 |
| OLIGO_04608 | BF041131 | WNT11         | 0.4439  | 0.6363 | 0.016   | 0.9861 |
| OLIGO_04607 | BF041132 | ITGB6         | -0.2018 | 0.6643 | -0.6309 | 0.1555 |
| OLIGO_04610 | BF041138 | FOXO3A        | 0.7131  | 0.1829 | 0.1576  | 0.7585 |
| OLIGO_04612 | BF041142 | GPR137B       | 1.2944  | 0      | 0.6831  | 0.0129 |
| OLIGO_04604 | BF041146 | C9orf89       | 0.3943  | 0.1581 | 0.1372  | 0.6082 |
| OLIGO_07819 | BF041160 | TBX2          | 0.2708  | 0.4424 | 0.2249  | 0.5057 |
| OLIGO_09203 | BF041163 | LOX           | 0.6743  | 0.2097 | 0.007   | 0.9891 |
| OLIGO_11554 | BF041165 | LOC617216     | -0.587  | 0.0573 | -0.0167 | 0.9548 |
| OLIGO_09321 | BF041168 | MGC127809     | -0.5176 | 0.1981 | -0.2476 | 0.5206 |
| OLIGO_04675 | BF041171 | C1orf82       | 0.4971  | 0.1266 | 0.6053  | 0.0517 |
| OLIGO_09315 | BF041173 | LOC538883     | -0.9526 | 0.1061 | -0.1628 | 0.773  |
| OLIGO_04676 | BF041174 | BCL6          | -0.4837 | 0.468  | -0.3557 | 0.5817 |
| OLIGO_11441 | BF041175 | ITPK1         | 0.2532  | 0.4102 | -0.0827 | 0.779  |
| OLIGO_04673 | BF041177 | SLC44A1       | 0.275   | 0.5353 | 0.128   | 0.764  |
| OLIGO_11553 | BF041179 | LOC524085     | -0.8464 | 0.1648 | -0.5189 | 0.3742 |

|             |          |           |         |        |         |        |
|-------------|----------|-----------|---------|--------|---------|--------|
| OLIGO_02156 | BF041186 | HK3       | 0.6198  | 0.1596 | 0.3001  | 0.4768 |
| OLIGO_04680 | BF041187 | GRHL1     | 0.3312  | 0.653  | 0.2669  | 0.7105 |
| OLIGO_10091 | BF041190 | POLS      | 0.5984  | 0.0955 | 0.0036  | 0.9894 |
| OLIGO_09319 | BF041196 | KIAA0323  | 0.1428  | 0.6446 | -0.0824 | 0.7814 |
| OLIGO_10552 | BF041198 | TF        | -2.685  | 0      | -1.3728 | 0.0221 |
| OLIGO_03255 | BF041201 | POLR1C    | 0.7784  | 0.01   | 0.2795  | 0.3334 |
| OLIGO_09313 | BF041202 | LOC615893 | 0.0967  | 0.8227 | -0.4033 | 0.3548 |
| OLIGO_04665 | BF041204 | ZXDB      | -0.0472 | 0.904  | -0.074  | 0.8436 |
| OLIGO_04670 | BF041209 | RIP       | -0.666  | 0.0964 | -0.2007 | 0.5992 |
| OLIGO_04669 | BF041210 | LOC530874 | -1.8515 | 0.0505 | -0.5919 | 0.4303 |
| OLIGO_07297 | BF041227 | KDELR2    | -0.9496 | 0.0061 | -0.1901 | 0.5641 |
| OLIGO_04183 | BF041243 | CDC23     | -0.3137 | 0.4566 | 0.0845  | 0.8353 |
| OLIGO_04185 | BF041253 | MLSTD1    | 1.2772  | 0.0001 | 0.4127  | 0.1754 |
| OLIGO_11486 | BF041272 | TRAF3     | -0.5971 | 0.2998 | -0.363  | 0.5108 |
| OLIGO_04184 | BF041273 | FCGR1A    | 1.7124  | 0.0001 | 1.0907  | 0.0081 |
| OLIGO_08981 | BF041275 | LOC63929  | -0.0802 | 0.7878 | 0.0622  | 0.8274 |
| OLIGO_11173 | BF041278 | HSP90AA1  | 0.6051  | 0.1534 | 0.4326  | 0.2869 |
| OLIGO_04601 | BF041284 | COG8      | -1.6478 | 0.034  | -1.5246 | 0.0428 |
| OLIGO_09280 | BF041287 | NLK       | 0.1424  | 0.7758 | 0.1083  | 0.8212 |
| OLIGO_09279 | BF041292 | LHFPL2    | 0.1035  | 0.8363 | 0.3571  | 0.457  |
| OLIGO_08936 | BF041297 | RGR       | 0.145   | 0.6234 | 0.1383  | 0.6303 |
| OLIGO_03550 | BF041298 | MLLT7     | -0.9502 | 0.0361 | -0.6933 | 0.1098 |
| OLIGO_09284 | BF041299 | GYLTL1B   | -0.3024 | 0.4974 | 0.0088  | 0.9836 |
| OLIGO_04606 | BF041307 | LGALS1    | -0.5253 | 0.1869 | -0.5656 | 0.1383 |
| OLIGO_09392 | BF041308 | LOC512949 | 0.1512  | 0.8487 | -0.005  | 0.9948 |
| OLIGO_04603 | BF041310 | SPAG1     | 0.1295  | 0.751  | -0.1776 | 0.6501 |
| OLIGO_04602 | BF041311 | Rps6ka6   | -0.8764 | 0.0139 | -0.2316 | 0.4964 |
| OLIGO_09281 | BF041316 | MYST1     | 0.6349  | 0.475  | 0.35    | 0.6873 |
| OLIGO_09051 | BF041320 | ATXN3     | -0.2976 | 0.4018 | -0.2894 | 0.3952 |
| OLIGO_05032 | BF041329 | CDK5RAP1  | 0.1487  | 0.6307 | -0.0184 | 0.9505 |
| OLIGO_05028 | BF041336 | TRIM24    | -0.8033 | 0.1799 | -0.4857 | 0.3974 |
| OLIGO_05029 | BF041338 | C2orf7    | -0.2947 | 0.4864 | -0.2089 | 0.6085 |
| OLIGO_05030 | BF041340 | ME1       | 1.2158  | 0.0005 | 0.7946  | 0.0174 |
| OLIGO_05020 | BF041343 | FGFR2     | -0.2082 | 0.5868 | -0.1524 | 0.6775 |
| OLIGO_05021 | BF041346 | FLJ12716  | -0.3484 | 0.3422 | -0.238  | 0.4986 |
| OLIGO_10624 | BF041354 | HNRPC     | 0.4335  | 0.203  | 0.0475  | 0.8842 |
| OLIGO_11605 | BF041356 | C2orf33   | 0.714   | 0.0139 | 0.3428  | 0.2165 |
| OLIGO_05025 | BF041358 | EIF4B     | 0.3236  | 0.5049 | 0.3911  | 0.4008 |
| OLIGO_09238 | BF041368 | PUM1      | 0.0837  | 0.8393 | -0.032  | 0.9352 |
| OLIGO_10164 | BF041372 | ILKAP     | 0.2224  | 0.5021 | -0.1076 | 0.7349 |
| OLIGO_05022 | BF041378 | RNUXA     | 0.1525  | 0.6712 | 0.1969  | 0.5662 |
| OLIGO_08257 | BF041379 | MYO5B     | 0.5703  | 0.036  | -0.1009 | 0.6977 |
| OLIGO_05024 | BF041383 | 40243     | 0.3061  | 0.2729 | 0.1928  | 0.4712 |
| OLIGO_05023 | BF041387 | MST101    | -0.4332 | 0.2581 | -0.2902 | 0.4272 |
| OLIGO_07313 | BF041390 | GPR172B   | -0.2484 | 0.2612 | -0.3346 | 0.1126 |
| OLIGO_08815 | BF041392 | ZNF322A   | -0.0494 | 0.9214 | -0.3096 | 0.527  |
| OLIGO_10509 | BF041399 | COX6A1    | 0.0974  | 0.8092 | 0.5656  | 0.1445 |
| OLIGO_00720 | BF041407 | DHX29     | -0.2011 | 0.4181 | -0.1636 | 0.4903 |
| OLIGO_04125 | BF041416 | TBC1D15   | -0.0802 | 0.8609 | 0.3935  | 0.3714 |
| OLIGO_08933 | BF041420 | RAVER1    | -0.1371 | 0.7142 | -0.051  | 0.8869 |
| OLIGO_04114 | BF041422 | SFRS2IP   | 0.2084  | 0.6387 | -0.2904 | 0.4951 |
| OLIGO_04128 | BF041425 | GLTP      | 0.319   | 0.42   | 0.0805  | 0.8318 |
| OLIGO_11591 | BF041426 | LRRFIP2   | -0.1967 | 0.6979 | -0.0647 | 0.894  |
| OLIGO_04545 | BF041430 | UCK1      | 0.7863  | 0.2489 | 0.7671  | 0.2414 |
| OLIGO_07941 | BF041432 | PPME1     | 0.862   | 0.0163 | 0.2254  | 0.5112 |

|             |          |           |         |        |         |        |
|-------------|----------|-----------|---------|--------|---------|--------|
| OLIGO_06804 | BF041433 | RFP2      | 0.3228  | 0.3562 | 0.1638  | 0.6317 |
| OLIGO_04538 | BF041437 | IWS1      | -0.7815 | 0.1097 | -0.5331 | 0.2548 |
| OLIGO_04536 | BF041447 | CENPJ     | -0.3052 | 0.7417 | -0.2765 | 0.7623 |
| OLIGO_04543 | BF041453 | SLC4A5    | 0.1628  | 0.5796 | 0.0318  | 0.9096 |
| OLIGO_04544 | BF041455 | POLR2I    | 0.0196  | 0.9405 | 0.1082  | 0.6663 |
| OLIGO_10886 | BF041457 | LOC510090 | -0.851  | 0.2254 | -0.5659 | 0.3952 |
| OLIGO_02283 | BF041459 | USP30     | 0.0791  | 0.829  | -0.0478 | 0.8912 |
| OLIGO_04534 | BF041463 | GRINL1A   | -0.006  | 0.9895 | 0.0242  | 0.9562 |
| OLIGO_09191 | BF041467 | UNC50     | -0.032  | 0.9052 | 0.2861  | 0.2668 |
| OLIGO_10672 | BF041480 | API5      | -0.4271 | 0.3324 | -0.3876 | 0.3578 |
| OLIGO_07566 | BF041481 | DDX48     | 0.2584  | 0.4479 | 0.247   | 0.4514 |
| OLIGO_04539 | BF041486 | TCAM1     | 1.9972  | 0.0002 | 1.341   | 0.0081 |
| OLIGO_04541 | BF041501 | LOC515651 | 0.2003  | 0.3245 | 0.1581  | 0.4145 |
| OLIGO_05027 | BF041503 | LOC113179 | 0.8864  | 0.2751 | 0.4499  | 0.5633 |
| OLIGO_05026 | BF041505 | SUPT16H   | -0.6422 | 0.3419 | -0.6285 | 0.332  |
| OLIGO_09338 | BF041516 | AMFR      | 0.1363  | 0.6014 | 0.3631  | 0.1461 |
| OLIGO_01593 | BF041521 | C17orf32  | -0.3733 | 0.2712 | 0.0374  | 0.9089 |
| OLIGO_05039 | BF041533 | SPI       | -0.022  | 0.9284 | 0.2655  | 0.26   |
| OLIGO_05043 | BF041536 | CLEC3B    | 0.0923  | 0.9047 | -0.0294 | 0.969  |
| OLIGO_09496 | BF041538 | MDC1      | 0.0867  | 0.8764 | -0.0368 | 0.9463 |
| OLIGO_08702 | BF041539 | PODXL2    | 0.3301  | 0.6114 | 0.3872  | 0.5343 |
| OLIGO_05037 | BF041541 | WDR50     | 0.1978  | 0.7148 | 0.248   | 0.6328 |
| OLIGO_08969 | BF041545 | ESM1      | -0.8755 | 0.174  | -0.4276 | 0.4926 |
| OLIGO_05045 | BF041548 | USP52     | -0.1982 | 0.5112 | -0.0242 | 0.9337 |
| OLIGO_04121 | BF041549 | DDX56     | 0.334   | 0.5583 | 0.1432  | 0.7965 |
| OLIGO_04120 | BF041552 | MEF2D     | 0.4801  | 0.3905 | 0.1602  | 0.7634 |
| OLIGO_11540 | BF041553 | WWC2      | -0.3322 | 0.3805 | -0.193  | 0.595  |
| OLIGO_04117 | BF041567 | B3GNT8    | -0.3131 | 0.562  | -0.1649 | 0.7544 |
| OLIGO_11487 | BF041569 | ADAM17    | 0.0137  | 0.9699 | 0.5798  | 0.1485 |
| OLIGO_04118 | BF041570 | LOC404066 | 0.1203  | 0.848  | 0.1565  | 0.8002 |
| OLIGO_04124 | BF041580 | TTC5      | 0.2942  | 0.3157 | -0.4191 | 0.1479 |
| OLIGO_08932 | BF041582 | TMED3     | 0.2593  | 0.3248 | 0.206   | 0.4145 |
| OLIGO_11308 | BF041583 | EIF3S3    | 0.5389  | 0.1254 | 0.1253  | 0.7092 |
| OLIGO_11471 | BF041588 | TBRG4     | -0.1235 | 0.6588 | 0.052   | 0.8463 |
| OLIGO_04115 | BF041590 | FLJ41747  | 0.6738  | 0.0337 | -0.0031 | 0.9917 |
| OLIGO_04113 | BF041597 | DDX23     | 0.2088  | 0.8057 | -0.2007 | 0.8101 |
| OLIGO_04112 | BF041598 | DLX3      | 0.1876  | 0.626  | -0.0842 | 0.8186 |
| OLIGO_08889 | BF041602 | MGC42367  | 0.4465  | 0.3464 | -0.0353 | 0.9381 |
| OLIGO_08938 | BF041604 | C2orf7    | -0.7377 | 0.0111 | -0.4781 | 0.0835 |
| OLIGO_04127 | BF041605 | NCOA2     | -0.6932 | 0.2513 | -0.5061 | 0.3774 |
| OLIGO_06974 | BF041607 | MRFAP1    | 0.1827  | 0.6654 | -0.3235 | 0.4269 |
| OLIGO_11671 | BF041610 | RPRC1     | 0.6966  | 0.1738 | 0.5527  | 0.2595 |
| OLIGO_04116 | BF041614 | GATA3     | -0.8146 | 0.1989 | -0.7462 | 0.2179 |
| OLIGO_09245 | BF041622 | ALKBH4    | -0.108  | 0.6995 | -0.0815 | 0.7613 |
| OLIGO_11210 | BF041628 | RRAGC     | 0.2113  | 0.5287 | 0.0492  | 0.8783 |
| OLIGO_09232 | BF041631 | ZNHIT1    | -0.4395 | 0.1306 | -0.222  | 0.4255 |
| OLIGO_04550 | BF041635 | MGC40499  | 0.2631  | 0.4873 | -0.2425 | 0.5005 |
| OLIGO_08706 | BF041636 | SLC7A4    | 0.5324  | 0.3257 | 0.1199  | 0.8174 |
| OLIGO_04551 | BF041637 | GNPAT     | -1.2015 | 0.1327 | -0.2814 | 0.6484 |
| OLIGO_04549 | BF041642 | OTUD5     | 0.0567  | 0.8158 | 0.2292  | 0.325  |
| OLIGO_07898 | BF041643 | JARID1B   | -0.7766 | 0.0303 | -0.6077 | 0.0751 |
| OLIGO_04547 | BF041658 | CHMP5     | 0.5937  | 0.1874 | 0.4925  | 0.2518 |
| OLIGO_08697 | BF041669 | LOC511319 | 0.3318  | 0.2435 | -0.2816 | 0.3    |
| OLIGO_05042 | BF041675 | CASD1     | -0.3589 | 0.5109 | -0.0722 | 0.8907 |
| OLIGO_11630 | BF041679 | LOC285636 | -0.2449 | 0.6534 | -0.2611 | 0.6176 |

|             |          |               |         |        |         |        |
|-------------|----------|---------------|---------|--------|---------|--------|
| OLIGO_09497 | BF041680 | LOC57228      | -0.1939 | 0.4509 | 0.0809  | 0.7419 |
| OLIGO_05044 | BF041683 | AP1G1         | -0.1781 | 0.6209 | -0.0498 | 0.8854 |
| OLIGO_09492 | BF041698 | ANXA11        | 0.4043  | 0.4803 | 0.3582  | 0.5143 |
| OLIGO_04972 | BF041705 | LOC651760     | -0.0686 | 0.8651 | -0.0437 | 0.9101 |
| OLIGO_04976 | BF041716 | IL21R         | 0.3031  | 0.2999 | -0.1147 | 0.6809 |
| OLIGO_06452 | BF041720 | TINAGL1       | 0.0399  | 0.9346 | 0.0947  | 0.839  |
| OLIGO_06450 | BF041721 | SOSTDC1       | -0.1396 | 0.8102 | 0.2654  | 0.6485 |
| OLIGO_06454 | BF041724 | LOC525506     | 0.6852  | 0.1324 | 0.4969  | 0.2549 |
| OLIGO_06439 | BF041729 | CRIP1         | 0.6261  | 0.0639 | -0.2175 | 0.5012 |
| OLIGO_06474 | BF041732 | SLC4A9        | -0.3864 | 0.4253 | -0.3977 | 0.3921 |
| OLIGO_08261 | BF041736 | Pafah1b2      | 0.0757  | 0.8717 | 0.1604  | 0.7211 |
| OLIGO_06473 | BF041738 | CUL2          | -0.6647 | 0.1732 | -0.0396 | 0.9326 |
| OLIGO_11243 | BF041741 | DRCTNNB1A     | -0.0153 | 0.9717 | 0.0489  | 0.9077 |
| OLIGO_06416 | BF041744 | P15RS         | 0.0978  | 0.6995 | 0.5327  | 0.0286 |
| OLIGO_07272 | BF041753 | HSPD1         | 0.0034  | 0.9922 | -0.0099 | 0.9764 |
| OLIGO_10431 | BF041759 | PPP1R15A      | 0.1026  | 0.8004 | 0.0079  | 0.9838 |
| OLIGO_04078 | BF041763 | HEYL          | -0.6489 | 0.1318 | -0.4221 | 0.2915 |
| OLIGO_06457 | BF041764 | DEDD2         | -0.3584 | 0.2601 | -0.075  | 0.8055 |
| OLIGO_08892 | BF041765 | GAL3ST1       | -0.6556 | 0.2327 | -0.4213 | 0.4149 |
| OLIGO_06476 | BF041770 | CD68          | -0.6623 | 0.1745 | -0.192  | 0.6763 |
| OLIGO_08782 | BF041775 | GTL3          | 0.366   | 0.2919 | 0.2375  | 0.4761 |
| OLIGO_04554 | BF041780 | ABHD13        | 0.7408  | 0.1079 | 0.6887  | 0.119  |
| OLIGO_04077 | BF041787 | PPWD1         | -0.3294 | 0.298  | -0.4154 | 0.1729 |
| OLIGO_06434 | BF041789 | SPTLC2        | 0.3456  | 0.1245 | 0.328   | 0.1264 |
| OLIGO_06433 | BF041790 | GALNT1        | -0.1089 | 0.751  | 0.3576  | 0.2775 |
| OLIGO_04475 | BF041798 | LAMA4         | -0.6138 | 0.0388 | -0.1762 | 0.5348 |
| OLIGO_04464 | BF041803 | CHST7         | -0.2879 | 0.645  | -0.2954 | 0.6181 |
| OLIGO_11448 | BF041804 | PEPD          | -0.4481 | 0.1705 | 0.0484  | 0.8773 |
| OLIGO_04465 | BF041812 | PLA2G4B       | 0.4574  | 0.3667 | 0.0236  | 0.9613 |
| OLIGO_04468 | BF041814 | XLKD1         | -0.4577 | 0.4987 | -0.2976 | 0.6475 |
| OLIGO_04477 | BF041820 | TNNI3         | -1.3261 | 0.0044 | -0.798  | 0.0704 |
| OLIGO_01271 | BF041822 | AKAP9         | -0.0297 | 0.9502 | -0.1193 | 0.7936 |
| OLIGO_04473 | BF041825 | ASB2          | 0.468   | 0.3661 | 0.3808  | 0.4431 |
| OLIGO_04463 | BF041832 | ENPP4         | 0.4627  | 0.3528 | 1.1137  | 0.0206 |
| OLIGO_04471 | BF041833 | SCUBE1        | -0.3815 | 0.3078 | -0.3624 | 0.3098 |
| OLIGO_04470 | BF041835 | C8orf4        | -0.0283 | 0.9359 | 0.1904  | 0.5727 |
| OLIGO_04472 | BF041839 | TLN2          | -0.2638 | 0.2949 | -0.1331 | 0.5806 |
| OLIGO_09460 | BF041841 | LOC505009     | -0.2423 | 0.4274 | 0.1326  | 0.652  |
| OLIGO_11780 | BF041846 | PPRC1         | 0.07    | 0.8626 | 0.2721  | 0.483  |
| OLIGO_04971 | BF041847 | SRCAP         | -0.1018 | 0.7156 | 0.2036  | 0.4468 |
| OLIGO_04970 | BF041852 | PIP5K3        | -0.0168 | 0.9713 | 0.009   | 0.984  |
| OLIGO_04973 | BF041860 | MTHFD1L       | 1.1461  | 0.0116 | 1.227   | 0.0049 |
| OLIGO_04974 | BF041861 | DKFZp586C0721 | -0.2589 | 0.5207 | -0.2243 | 0.5613 |
| OLIGO_11118 | BF041863 | LOC618652     | -1.4754 | 0.2256 | -2.8862 | 0.0174 |
| OLIGO_04967 | BF041867 | HSPB7         | -0.34   | 0.6697 | 0.3148  | 0.6819 |
| OLIGO_09459 | BF041872 | ELMO2         | -0.2043 | 0.4606 | -0.0189 | 0.9429 |
| OLIGO_10632 | BF041873 | PSMA5         | 0.2097  | 0.5148 | 0.3119  | 0.3507 |
| OLIGO_04969 | BF041876 | TMEM11        | 0.4562  | 0.2853 | 0.0876  | 0.8296 |
| OLIGO_04968 | BF041881 | POLD4         | 0.3551  | 0.319  | 0.3194  | 0.3488 |
| OLIGO_07854 | BF041885 | NDUFA12       | 0.6686  | 0.1543 | 0.8598  | 0.0794 |
| OLIGO_04977 | BF041888 | TMEM85        | -0.0533 | 0.8408 | -0.1155 | 0.6485 |
| OLIGO_04978 | BF041889 | RAB11FIP5     | 0.1025  | 0.7411 | 0.2193  | 0.4593 |
| OLIGO_02695 | BF041896 | CPSF3         | -0.1318 | 0.8261 | -0.1359 | 0.8141 |
| OLIGO_10642 | BF041903 | POLR2G        | -0.3962 | 0.3795 | 0.0112  | 0.9793 |
| OLIGO_04082 | BF041910 | XPO6          | -0.108  | 0.8181 | 0.218   | 0.6282 |

|             |          |           |         |        |         |        |
|-------------|----------|-----------|---------|--------|---------|--------|
| OLIGO_06485 | BF041917 | SEC24B    | -0.6145 | 0.2111 | -0.3057 | 0.5161 |
| OLIGO_06492 | BF041921 | RTN4RL2   | 0.3588  | 0.397  | 0.3942  | 0.3318 |
| OLIGO_06487 | BF041931 | CHST6     | -1.2265 | 0.0735 | -0.4499 | 0.4948 |
| OLIGO_01808 | BF041933 | TRPM4     | 0.4108  | 0.2872 | 0.2014  | 0.5738 |
| OLIGO_08904 | BF041938 | APIP      | -0.0965 | 0.7668 | 0.6114  | 0.0505 |
| OLIGO_08248 | BF041939 | MRPL43    | 0.2847  | 0.4205 | 0.5864  | 0.0891 |
| OLIGO_06503 | BF041943 | STOML3    | 0.2954  | 0.778  | -0.1606 | 0.8758 |
| OLIGO_04081 | BF041945 | TSC22D2   | 0.9219  | 0.2863 | 0.7355  | 0.3749 |
| OLIGO_04080 | BF041946 | IFIT2     | 0.7604  | 0.1711 | 0.2339  | 0.6522 |
| OLIGO_09624 | BF041958 | PTPN6     | 0.2754  | 0.4522 | 0.0716  | 0.8385 |
| OLIGO_04479 | BF041963 | ZNF507    | -0.1952 | 0.6279 | -0.0568 | 0.883  |
| OLIGO_05123 | BF041965 | LSS       | 0.1502  | 0.7685 | 0.1241  | 0.7997 |
| OLIGO_09195 | BF041972 | MRPS17    | 0.9028  | 0.1229 | 0.5611  | 0.2974 |
| OLIGO_07409 | BF041978 | ZNF38     | 0.2882  | 0.4821 | -0.1712 | 0.6634 |
| OLIGO_04390 | BF041981 | LOC513412 | -0.7696 | 0.0715 | -0.3428 | 0.4039 |
| OLIGO_04476 | BF041987 | LGTN      | -0.4813 | 0.3861 | -0.1398 | 0.7962 |
| OLIGO_04422 | BF041996 | C7orf26   | -0.2818 | 0.5429 | -0.4964 | 0.2977 |
| OLIGO_04421 | BF041997 | RCOR3     | -0.1554 | 0.7729 | -0.0143 | 0.9782 |
| OLIGO_04914 | BF042008 | FLJ12886  | -0.2333 | 0.5779 | -0.1723 | 0.6706 |
| OLIGO_09435 | BF042009 | VBP1      | 0.1304  | 0.6418 | 0.1353  | 0.6132 |
| OLIGO_06608 | BF042010 | FDXR      | 0.6192  | 0.1112 | 0.4746  | 0.2027 |
| OLIGO_04913 | BF042011 | C10orf42  | -0.8488 | 0.0971 | -0.294  | 0.5483 |
| OLIGO_04910 | BF042017 | HBS1L     | 0.327   | 0.324  | 0.1662  | 0.601  |
| OLIGO_04918 | BF042026 | CHCHD8    | 0.0524  | 0.9009 | 0.0571  | 0.8875 |
| OLIGO_04919 | BF042027 | WDFY3     | -0.5035 | 0.2318 | -0.2442 | 0.5141 |
| OLIGO_04916 | BF042031 | LOC653870 | -0.4477 | 0.3039 | -0.0839 | 0.8398 |
| OLIGO_09750 | BF042032 | EFTUD2    | 0.3799  | 0.3037 | -0.301  | 0.3952 |
| OLIGO_06551 | BF042034 | ZMAT2     | -0.0847 | 0.6547 | -0.0504 | 0.7812 |
| OLIGO_07127 | BF042039 | HSPA14    | -0.0633 | 0.8309 | 0.1378  | 0.6371 |
| OLIGO_04908 | BF042040 | KPNA1     | -0.1636 | 0.704  | -0.6279 | 0.1288 |
| OLIGO_02544 | BF042048 | McI1      | 0.6472  | 0.1571 | 1.0243  | 0.0198 |
| OLIGO_06764 | BF042062 | SLC40A1   | -1.6901 | 0.004  | -0.4588 | 0.4094 |
| OLIGO_04912 | BF042063 | ABCC6     | 0.093   | 0.8677 | -0.0576 | 0.9148 |
| OLIGO_08947 | BF042069 | TMEM103   | 0.3243  | 0.4277 | 0.2078  | 0.599  |
| OLIGO_04423 | BF042073 | RHPN2     | 0.2156  | 0.533  | 0.1864  | 0.5741 |
| OLIGO_09081 | BF042074 | LIPE      | -0.0546 | 0.9187 | -0.5235 | 0.3062 |
| OLIGO_08154 | BF042079 | TCEB1     | 0.3483  | 0.3068 | 0.1896  | 0.5615 |
| OLIGO_04413 | BF042089 | BCKDHA    | -0.041  | 0.9172 | 0.0507  | 0.8933 |
| OLIGO_11734 | BF042092 | RPP30     | 0.314   | 0.3747 | -0.1124 | 0.7403 |
| OLIGO_09148 | BF042096 | FAM44B    | -0.5029 | 0.0792 | -0.1852 | 0.4996 |
| OLIGO_04416 | BF042105 | ARHGEF5   | 0.2343  | 0.4965 | 0.0258  | 0.9378 |
| OLIGO_08977 | BF042119 | TRAPPC6A  | 0.2208  | 0.6724 | 0.4194  | 0.4023 |
| OLIGO_09399 | BF042121 | TMEM142A  | 2.2202  | 0.0253 | 0.7698  | 0.4026 |
| OLIGO_04836 | BF042122 | EFNA5     | -2.064  | 0.0012 | -1.2793 | 0.0341 |
| OLIGO_09900 | BF042129 | PPP2R5A   | 0.6112  | 0.056  | 0.4554  | 0.137  |
| OLIGO_11590 | BF042130 | CS        | 0.0906  | 0.8759 | -0.0356 | 0.949  |
| OLIGO_04917 | BF042131 | RAC2      | 2.3914  | 0.0001 | 1.6307  | 0.004  |
| OLIGO_04915 | BF042133 | FAM57A    | 0.1454  | 0.593  | -0.0615 | 0.8135 |
| OLIGO_06802 | BF042135 | STMN1     | 1.1633  | 0.0267 | 0.3225  | 0.5196 |
| OLIGO_07549 | BF042143 | MAPBPIP   | -0.2571 | 0.4257 | 0.0197  | 0.9492 |
| OLIGO_04920 | BF042144 | TBRG1     | 0.8137  | 0.1829 | 0.1978  | 0.7353 |
| OLIGO_06510 | BF042147 | RY1       | -0.271  | 0.5218 | 0.3293  | 0.4197 |
| OLIGO_08869 | BF042150 | SLC16A7   | -0.1846 | 0.7171 | 0.2164  | 0.6577 |
| OLIGO_04063 | BF042163 | SCAMP4    | -0.5088 | 0.0863 | -0.1936 | 0.4935 |
| OLIGO_08874 | BF042165 | PDCD8     | -0.5965 | 0.1741 | 0.1939  | 0.6446 |



|             |          |           |         |        |         |        |
|-------------|----------|-----------|---------|--------|---------|--------|
| OLIGO_11164 | BF042169 | TEAD2     | -0.766  | 0.0327 | -0.4597 | 0.1784 |
| OLIGO_12800 | BF042170 | IGSF4     | 0.3867  | 0.5098 | -0.0596 | 0.9169 |
| OLIGO_04060 | BF042172 | NCOR1     | -0.7191 | 0.0371 | -0.4959 | 0.1352 |
| OLIGO_07809 | BF042174 | PARK7     | -0.0061 | 0.9839 | -0.1203 | 0.6746 |
| OLIGO_06382 | BF042175 | SERPINI1  | 1.0729  | 0.0095 | 0.7338  | 0.0625 |
| OLIGO_06413 | BF042178 | SMOX      | -0.9926 | 0.1866 | -0.2613 | 0.7153 |
| OLIGO_06410 | BF042179 | TRPM6     | -2.1187 | 0.0064 | -1.3656 | 0.0654 |
| OLIGO_08870 | BF042181 | HAGH      | -0.7119 | 0.1115 | -0.7025 | 0.1015 |
| OLIGO_08888 | BF042183 | SNX3      | 0.3633  | 0.2219 | 0.2692  | 0.3451 |
| OLIGO_04424 | BF042188 | CHD7      | -0.3021 | 0.3781 | -0.2384 | 0.4669 |
| OLIGO_02972 | BF042189 | GLT25D1   | -0.1023 | 0.6487 | -0.0898 | 0.676  |
| OLIGO_04419 | BF042192 | PLA2G12B  | -0.3878 | 0.418  | -0.3641 | 0.4277 |
| OLIGO_04417 | BF042198 | MGC52057  | 0.2207  | 0.4477 | -0.357  | 0.1997 |
| OLIGO_09150 | BF042200 | LOC541219 | 0.2401  | 0.6627 | 0.2491  | 0.6369 |
| OLIGO_07832 | BF042202 | SEMA4B    | 0.8121  | 0.0436 | 0.4393  | 0.2541 |
| OLIGO_10883 | BF042206 | LRDD      | 0.574   | 0.3376 | 0.5605  | 0.3288 |
| OLIGO_09396 | BF042207 | MAP2K1    | 1.0815  | 0.0032 | 0.8174  | 0.0195 |
| OLIGO_07999 | BF042208 | SLC1A3    | 2.7999  | 0      | 1.8177  | 0.0022 |
| OLIGO_04839 | BF042209 | CIZ1      | -0.4481 | 0.0991 | -0.0074 | 0.9774 |
| OLIGO_04838 | BF042210 | TACC1     | 0.4731  | 0.4277 | 0.4387  | 0.4535 |
| OLIGO_11578 | BF042216 | MCART1    | -1.045  | 0.1609 | -0.6057 | 0.3986 |
| OLIGO_04846 | BF042217 | C7orf28A  | 0.1186  | 0.7084 | 0.3966  | 0.1963 |
| OLIGO_09255 | BF042220 | SNRPA     | -0.3983 | 0.466  | -0.0097 | 0.9852 |
| OLIGO_04844 | BF042221 | ZNF664    | 0.2011  | 0.594  | -0.1806 | 0.6173 |
| OLIGO_09301 | BF042227 | APBA3     | -0.8055 | 0.02   | -0.6738 | 0.0423 |
| OLIGO_10904 | BF042233 | TBC1D4    | -0.4329 | 0.3317 | -0.2218 | 0.603  |
| OLIGO_04833 | BF042236 | ARFGEF1   | 0.7021  | 0.0783 | 0.651   | 0.0886 |
| OLIGO_04837 | BF042240 | SNX27     | -0.724  | 0.0202 | -0.483  | 0.1033 |
| OLIGO_07698 | BF042244 | TMEM60    | 0.8948  | 0.0081 | 0.4642  | 0.1507 |
| OLIGO_07000 | BF042245 | ZNF598    | -0.5935 | 0.3254 | -0.5695 | 0.3345 |
| OLIGO_04058 | BF042251 | AMACR     | 0.1644  | 0.7017 | -0.0037 | 0.9928 |
| OLIGO_04062 | BF042255 | DNAJB1    | -0.9141 | 0.1117 | -0.0203 | 0.9698 |
| OLIGO_04061 | BF042266 | GGA1      | 0.191   | 0.6505 | 0.1025  | 0.7999 |
| OLIGO_04056 | BF042273 | AOX2      | 0.6757  | 0.3468 | 0.3348  | 0.6267 |
| OLIGO_06594 | BF042283 | RWDD1     | 0.4045  | 0.2493 | 0.7449  | 0.0272 |
| OLIGO_08796 | BF042287 | LOC536377 | 0.5969  | 0.1191 | 0.6573  | 0.0736 |
| OLIGO_08797 | BF042289 | HMX2      | 0.0321  | 0.924  | -0.1603 | 0.6223 |
| OLIGO_04028 | BF042291 | Mfhas1    | 1.6589  | 0.0371 | 0.9406  | 0.2168 |
| OLIGO_08792 | BF042292 | DNAJC1    | -0.2904 | 0.3908 | -0.4567 | 0.1581 |
| OLIGO_11637 | BF042308 | NUP85     | 0.0331  | 0.9081 | -0.2426 | 0.376  |
| OLIGO_10917 | BF042311 | ATP1A1    | 0.1603  | 0.6044 | 0.5219  | 0.079  |
| OLIGO_04348 | BF042312 | CAMKK1    | 0.6664  | 0.0861 | 0.3771  | 0.3129 |
| OLIGO_04346 | BF042319 | C1orf124  | -0.2014 | 0.6778 | -0.0702 | 0.8805 |
| OLIGO_04345 | BF042320 | ATHL1     | 0.2311  | 0.5301 | 0.006   | 0.9865 |
| OLIGO_04339 | BF042327 | NRK       | -0.3231 | 0.5721 | -0.9174 | 0.094  |
| OLIGO_04340 | BF042333 | TMCO3     | -0.7682 | 0.2246 | -0.1301 | 0.83   |
| OLIGO_04349 | BF042334 | RPS6KC1   | 0.0034  | 0.9879 | 0.214   | 0.3177 |
| OLIGO_04343 | BF042337 | MAX       | 0.1171  | 0.8202 | 0.23    | 0.64   |
| OLIGO_11203 | BF042343 | NDUFA9    | 0.3033  | 0.5491 | 0.0829  | 0.8644 |
| OLIGO_04347 | BF042344 | TMEM30A   | 1.1586  | 0.0116 | 0.969   | 0.0276 |
| OLIGO_04841 | BF042357 | FLJ90024  | -0.3741 | 0.6427 | -0.2765 | 0.7278 |
| OLIGO_04840 | BF042359 | PLAGL1    | -0.4309 | 0.2235 | -0.5289 | 0.1194 |
| OLIGO_09397 | BF042370 | AGPAT3    | 0.4827  | 0.1381 | 0.2403  | 0.4407 |
| OLIGO_04858 | BF042377 | SULT1C2   | -0.5162 | 0.0933 | -0.5821 | 0.0482 |
| OLIGO_07947 | BF042383 | TBCA      | 0.6143  | 0.2215 | 1.0355  | 0.0587 |

|             |          |           |         |        |         |        |
|-------------|----------|-----------|---------|--------|---------|--------|
| OLIGO_04851 | BF042384 | CHST6     | 0.0181  | 0.969  | -0.0191 | 0.966  |
| OLIGO_09353 | BF042389 | ARHGDIB   | 1.1906  | 0.0047 | 1.2295  | 0.0023 |
| OLIGO_00839 | BF042401 | FLJ12118  | 1.2535  | 0.0817 | 1.0249  | 0.1375 |
| OLIGO_07464 | BF042405 | MGC16028  | -0.006  | 0.9845 | -0.0969 | 0.7421 |
| OLIGO_04034 | BF042407 | FAM20B    | 0.5912  | 0.2711 | -0.3374 | 0.5148 |
| OLIGO_10910 | BF042413 | RBM18     | 0.3181  | 0.2781 | 0.0265  | 0.9246 |
| OLIGO_02718 | BF042414 | C7orf19   | 0.1205  | 0.7447 | -0.1026 | 0.7758 |
| OLIGO_04026 | BF042415 | DYM       | 0.4901  | 0.1327 | 0.3968  | 0.2041 |
| OLIGO_08790 | BF042420 | PHLDB1    | 0.7631  | 0.0252 | 0.2711  | 0.4058 |
| OLIGO_06356 | BF042427 | C9orf78   | -0.2687 | 0.4774 | -0.053  | 0.8842 |
| OLIGO_08800 | BF042429 | EME1      | 0.4152  | 0.3892 | 0.5697  | 0.2181 |
| OLIGO_04030 | BF042441 | PLK3      | -0.2393 | 0.5307 | -0.0741 | 0.8403 |
| OLIGO_10848 | BF042446 | MS4A8B    | 0.122   | 0.7944 | 0.2822  | 0.5428 |
| OLIGO_06687 | BF042451 | MGST3     | -0.2433 | 0.5519 | -0.0535 | 0.8914 |
| OLIGO_04029 | BF042459 | TFPI      | -1.2046 | 0.0449 | 0.0893  | 0.8762 |
| OLIGO_04033 | BF042461 | WDSUB1    | -0.0463 | 0.9283 | -0.4063 | 0.4289 |
| OLIGO_02548 | BF042462 | PAPSS1    | -0.1654 | 0.525  | 0.2004  | 0.4226 |
| OLIGO_04032 | BF042464 | RASD1     | -0.3131 | 0.7691 | -0.5051 | 0.6321 |
| OLIGO_08791 | BF042465 | GRHL2     | -0.5416 | 0.2861 | -0.3944 | 0.42   |
| OLIGO_08779 | BF042469 | LOC618450 | 0.1085  | 0.7123 | -0.0563 | 0.8419 |
| OLIGO_04355 | BF042472 | LOC650797 | -0.4751 | 0.3231 | -0.2884 | 0.5308 |
| OLIGO_09121 | BF042474 | RANBP3    | -0.1898 | 0.6567 | -0.7277 | 0.076  |
| OLIGO_04360 | BF042475 | LRRFIP1   | 0.1798  | 0.768  | 0.4836  | 0.4127 |
| OLIGO_04362 | BF042479 | RAB20     | 0.0486  | 0.8684 | 0.1667  | 0.551  |
| OLIGO_04358 | BF042480 | KIAA0020  | -0.4896 | 0.1927 | -0.3918 | 0.2768 |
| OLIGO_04351 | BF042484 | KLF3      | -0.0659 | 0.8672 | 0.0113  | 0.976  |
| OLIGO_09236 | BF042501 | CEACAM1   | -0.8369 | 0.1084 | -0.5422 | 0.2713 |
| OLIGO_04359 | BF042511 | ZCSL3     | 0.4132  | 0.3046 | 0.2756  | 0.4739 |
| OLIGO_03998 | BF042521 | VPS4A     | 0.1793  | 0.8335 | 0.2552  | 0.7595 |
| OLIGO_06882 | BF042525 | SPTBN1    | 0.7094  | 0.1515 | 1.0285  | 0.0299 |
| OLIGO_07789 | BF042526 | NDUFB9    | 0.5145  | 0.1864 | 0.2937  | 0.4291 |
| OLIGO_06933 | BF042534 | DUSP12    | -0.091  | 0.7564 | -0.1425 | 0.6124 |
| OLIGO_04856 | BF042535 | HPS3      | 0.1064  | 0.8469 | -0.0263 | 0.9603 |
| OLIGO_04857 | BF042537 | GTF2B     | -0.0254 | 0.9537 | -0.301  | 0.4719 |
| OLIGO_00643 | BF042538 | AP3D1     | -0.8109 | 0.1167 | -0.2149 | 0.6642 |
| OLIGO_08974 | BF042542 | SCP2      | 0.2349  | 0.5438 | 0.1254  | 0.7337 |
| OLIGO_04853 | BF042544 | ALS2CR19  | -0.276  | 0.4987 | -0.0583 | 0.8814 |
| OLIGO_04855 | BF042545 | HMGA1     | -0.7993 | 0.1025 | -0.503  | 0.2834 |
| OLIGO_04854 | BF042546 | KIAA0703  | -1.3015 | 0.0283 | -0.6553 | 0.1956 |
| OLIGO_09401 | BF042549 | DOT1L     | 0.7737  | 0.2574 | 0.2541  | 0.6979 |
| OLIGO_04848 | BF042552 | KIAA0157  | -0.7203 | 0.1419 | -0.1098 | 0.8151 |
| OLIGO_11580 | BF042556 | C2orf3    | -0.4738 | 0.5223 | -0.2206 | 0.756  |
| OLIGO_09403 | BF042558 | NUBP2     | 0.1552  | 0.7537 | 0.0916  | 0.8468 |
| OLIGO_04777 | BF042572 | TESC      | 0.6331  | 0.1738 | 0.5411  | 0.224  |
| OLIGO_04778 | BF042573 | DPF3      | -0.0695 | 0.8052 | 0.0549  | 0.839  |
| OLIGO_04001 | BF042577 | IARS2     | 0.4027  | 0.2733 | 0.1151  | 0.7356 |
| OLIGO_06231 | BF042582 | ICMT      | 0.5544  | 0.1981 | 0.8728  | 0.0349 |
| OLIGO_02906 | BF042583 | PRKCBP1   | -0.7797 | 0.0207 | 0.0015  | 0.9962 |
| OLIGO_06230 | BF042585 | S100BPB   | -0.7703 | 0.0306 | -0.4846 | 0.165  |
| OLIGO_06271 | BF042595 | PIGT      | -0.0685 | 0.7586 | -0.1279 | 0.5498 |
| OLIGO_06281 | BF042596 | CLSTN1    | 0.8077  | 0.1396 | 0.7825  | 0.1349 |
| OLIGO_04004 | BF042599 | ASXL1     | -0.4418 | 0.4405 | 0.0887  | 0.8719 |
| OLIGO_06254 | BF042604 | FLJ20294  | -0.577  | 0.1937 | -0.0939 | 0.8253 |
| OLIGO_01583 | BF042605 | YIPF3     | -0.3856 | 0.3214 | -0.0986 | 0.7913 |
| OLIGO_04003 | BF042606 | LAMC1     | -0.2172 | 0.7052 | -0.0525 | 0.9241 |

|             |          |           |         |        |         |        |
|-------------|----------|-----------|---------|--------|---------|--------|
| OLIGO_06256 | BF042608 | LIN7C     | -0.0606 | 0.856  | 0.2983  | 0.3486 |
| OLIGO_06258 | BF042630 | KLHL3     | 0.0444  | 0.902  | 0.0211  | 0.9513 |
| OLIGO_06249 | BF042632 | MLXIPL    | 0.127   | 0.7876 | -0.2022 | 0.6548 |
| OLIGO_08721 | BF042633 | UBE2L6    | -0.123  | 0.8817 | 0.1832  | 0.821  |
| OLIGO_11437 | BF042635 | HOXD9     | 0.4431  | 0.4935 | 0.3794  | 0.5408 |
| OLIGO_02588 | BF042641 | FAM62A    | 0.7062  | 0.0326 | 0.4984  | 0.1136 |
| OLIGO_06250 | BF042642 | FNTB      | -0.0042 | 0.9899 | -0.0059 | 0.9854 |
| OLIGO_08221 | BF042647 | GTF2IP1   | -0.4687 | 0.4141 | 0.0147  | 0.9787 |
| OLIGO_04357 | BF042657 | REST      | 0.018   | 0.9709 | 0.0148  | 0.9749 |
| OLIGO_02168 | BF042659 | MECR      | 0.3504  | 0.5005 | 0.3624  | 0.4674 |
| OLIGO_10183 | BF042662 | TUFM      | -0.0616 | 0.8415 | 0.1493  | 0.6117 |
| OLIGO_09065 | BF042678 | SPINT2    | -2.9936 | 0.0008 | -0.9699 | 0.2559 |
| OLIGO_04283 | BF042682 | SMEK2     | -0.2094 | 0.5542 | -0.5072 | 0.1357 |
| OLIGO_04279 | BF042684 | RABGAP1L  | -0.0556 | 0.8756 | 0.5064  | 0.1375 |
| OLIGO_04280 | BF042685 | FLJ20152  | 1.4773  | 0.0006 | 1.1114  | 0.0064 |
| OLIGO_04272 | BF042688 | LOC647768 | 0.8473  | 0.0424 | 1.0901  | 0.0066 |
| OLIGO_04271 | BF042689 | RPUSD4    | -0.4963 | 0.194  | -0.0899 | 0.8053 |
| OLIGO_08764 | BF042692 | PTPN3     | -0.4406 | 0.2896 | -0.6214 | 0.1186 |
| OLIGO_07815 | BF042702 | H2AFJ     | -0.4044 | 0.3974 | -0.198  | 0.6655 |
| OLIGO_04776 | BF042710 | BCCIP     | -0.1046 | 0.7412 | 0.1564  | 0.6082 |
| OLIGO_07098 | BF042714 | TMED1     | -0.1948 | 0.5937 | -0.4955 | 0.1574 |
| OLIGO_02983 | BF042723 | ZNF609    | 0.0676  | 0.7669 | 0.0217  | 0.9208 |
| OLIGO_04769 | BF042724 | MTMR11    | 0.3165  | 0.453  | 0.2085  | 0.6037 |
| OLIGO_04771 | BF042728 | CDCA4     | 0.1272  | 0.6922 | -0.1554 | 0.614  |
| OLIGO_09365 | BF042732 | TGFBR1    | -0.8615 | 0.0885 | -0.6191 | 0.2011 |
| OLIGO_09369 | BF042740 | RAB22A    | 0.3049  | 0.3229 | 0.0877  | 0.7659 |
| OLIGO_04779 | BF042741 | CARHSP1   | 0.509   | 0.2365 | 0.3055  | 0.4585 |
| OLIGO_04780 | BF042743 | MLL4      | -0.4762 | 0.2304 | -0.3408 | 0.3704 |
| OLIGO_04773 | BF042744 | HPCAL1    | 0.4834  | 0.2836 | -0.2311 | 0.5927 |
| OLIGO_04774 | BF042752 | UEV3      | 1.5273  | 0.0126 | 0.6909  | 0.1892 |
| OLIGO_06338 | BF042759 | RABGEF1   | -0.0796 | 0.8047 | 0.1339  | 0.6643 |
| OLIGO_06293 | BF042762 | NDUFS3    | 0.0311  | 0.9174 | 0.0012  | 0.9967 |
| OLIGO_06315 | BF042769 | PSMA1     | 0.9546  | 0.0875 | 0.5738  | 0.2836 |
| OLIGO_06303 | BF042776 | JMJD1B    | 0.0085  | 0.9868 | -0.1427 | 0.7708 |
| OLIGO_11201 | BF042779 | TRIM33    | -0.8591 | 0.0564 | 0.0085  | 0.9843 |
| OLIGO_07603 | BF042786 | MGC24381  | -0.3121 | 0.5779 | -0.1014 | 0.8505 |
| OLIGO_04007 | BF042795 | RNF168    | 0.9052  | 0.0014 | 0.1813  | 0.4985 |
| OLIGO_06319 | BF042802 | SLC17A5   | -0.6096 | 0.291  | 0.1524  | 0.7829 |
| OLIGO_04286 | BF042810 | L3MBTL    | -0.1436 | 0.62   | 0.1634  | 0.5563 |
| OLIGO_04275 | BF042817 | NTHL1     | 0.7273  | 0.102  | 0.5172  | 0.2248 |
| OLIGO_04277 | BF042818 | LOC504800 | -0.3235 | 0.3411 | -0.0719 | 0.8248 |
| OLIGO_04278 | BF042819 | ANKRD11   | 1.137   | 0.0015 | 0.6637  | 0.0531 |
| OLIGO_04274 | BF042825 | UBPH      | 0.1793  | 0.5659 | 0.191   | 0.5235 |
| OLIGO_04284 | BF042829 | MBD4      | -0.4736 | 0.5085 | -0.0563 | 0.9359 |
| OLIGO_04285 | BF042832 | NANS      | -0.269  | 0.4131 | 0.366   | 0.2457 |
| OLIGO_04281 | BF042837 | ELOVL2    | 0.0577  | 0.8884 | -0.1237 | 0.7524 |
| OLIGO_08273 | BF042838 | CCDC58    | 0.1394  | 0.6902 | 0.1633  | 0.6263 |
| OLIGO_04282 | BF042842 | HRSP12    | 0.324   | 0.3587 | -0.4451 | 0.1888 |
| OLIGO_04268 | BF042845 | BACE1     | 0.4532  | 0.1626 | 0.4358  | 0.1613 |
| OLIGO_04269 | BF042847 | BAMBI     | -0.1627 | 0.6508 | -0.161  | 0.6404 |
| OLIGO_09062 | BF042851 | NFIC      | 0.7395  | 0.1836 | 0.3071  | 0.5644 |
| OLIGO_08140 | BF042852 | RGMB      | -0.009  | 0.9777 | -0.07   | 0.8235 |
| OLIGO_09063 | BF042853 | YAF2      | -1.16   | 0.0382 | -0.5072 | 0.3435 |
| OLIGO_00038 | BF042860 | RNF166    | -0.0886 | 0.8436 | -0.2335 | 0.5859 |
| OLIGO_11560 | BF042862 | HIF1A     | 0.6313  | 0.1807 | 0.7656  | 0.0906 |

|             |          |           |         |        |         |        |
|-------------|----------|-----------|---------|--------|---------|--------|
| OLIGO_09254 | BF042864 | UBTD1     | 0.0926  | 0.8816 | 0.0716  | 0.9067 |
| OLIGO_09344 | BF042866 | C20orf23  | -0.5311 | 0.1183 | -0.3733 | 0.2512 |
| OLIGO_04727 | BF042874 | PIK3C2A   | -0.1669 | 0.6918 | 0.0152  | 0.97   |
| OLIGO_01297 | BF042875 | IGBP1     | -0.1401 | 0.7163 | -0.0511 | 0.8901 |
| OLIGO_09913 | BF042876 | SRRM2     | 0.595   | 0.3262 | 0.197   | 0.7345 |
| OLIGO_04721 | BF042879 | CKAP2L    | 0.2439  | 0.4292 | 0.0603  | 0.8371 |
| OLIGO_09340 | BF042894 | TGFB2     | -0.3346 | 0.4133 | 0.1195  | 0.7599 |
| OLIGO_09346 | BF042899 | SERPINA3  | -1.1842 | 0.1136 | -0.527  | 0.4455 |
| OLIGO_04730 | BF042900 | EBAG9     | 0.0945  | 0.722  | -0.1425 | 0.5787 |
| OLIGO_11165 | BF042902 | KIAA0195  | 0.1043  | 0.779  | -0.3016 | 0.422  |
| OLIGO_04726 | BF042909 | SFRS9     | 0.1127  | 0.8261 | 0.0911  | 0.8532 |
| OLIGO_04723 | BF042913 | NOMO1     | 1.1328  | 0.0493 | 0.5581  | 0.3117 |
| OLIGO_06331 | BF042920 | Zfp295    | 0.1237  | 0.8202 | -0.5264 | 0.3111 |
| OLIGO_04005 | BF042921 | MGC18216  | 0.8251  | 0.1819 | -0.0699 | 0.9037 |
| OLIGO_06344 | BF042937 | CCRN4L    | -0.4253 | 0.3333 | -0.5673 | 0.1807 |
| OLIGO_04008 | BF042942 | DHX15     | 0.0361  | 0.9205 | 0.3884  | 0.3146 |
| OLIGO_10831 | BF042949 | LOC509768 | 0.0477  | 0.8659 | 0.0722  | 0.789  |
| OLIGO_00068 | BF042951 | GPX3      | -0.4595 | 0.0647 | -0.1973 | 0.4054 |
| OLIGO_04652 | BF042952 | WWC3      | -0.3036 | 0.5242 | -0.1337 | 0.7698 |
| OLIGO_10200 | BF042954 | FLJ11021  | -0.1266 | 0.6171 | -0.1153 | 0.6347 |
| OLIGO_04231 | BF042956 | TCOF1     | 0.7575  | 0.168  | 0.0719  | 0.8918 |
| OLIGO_04232 | BF042958 | MRPL24    | 0.0045  | 0.9804 | -0.0266 | 0.8802 |
| OLIGO_02884 | BF042964 | NAB2      | 0.2522  | 0.741  | 0.1473  | 0.835  |
| OLIGO_09024 | BF042966 | SFXN1     | 0.3815  | 0.2882 | -0.3729 | 0.279  |
| OLIGO_03946 | BF042967 | ABCD3     | -0.2276 | 0.5036 | 0.2753  | 0.3878 |
| OLIGO_04235 | BF042972 | PHF13     | -0.276  | 0.4888 | -0.019  | 0.9602 |
| OLIGO_07131 | BF042973 | CCDC23    | -0.2595 | 0.5296 | -0.1437 | 0.7152 |
| OLIGO_04236 | BF042975 | UBP1      | -0.2691 | 0.5508 | -0.1383 | 0.7529 |
| OLIGO_08975 | BF042983 | BTF3L4    | 0.354   | 0.5563 | 0.3141  | 0.5943 |
| OLIGO_04225 | BF042986 | RABGGTA   | -0.2472 | 0.5629 | -0.3218 | 0.4321 |
| OLIGO_00967 | BF042987 | IFT52     | -0.0122 | 0.9801 | -0.3729 | 0.4325 |
| OLIGO_09021 | BF042994 | C9orf102  | -0.4119 | 0.344  | -0.2944 | 0.4795 |
| OLIGO_09018 | BF042997 | FAM82A    | -0.4784 | 0.1965 | -0.7188 | 0.0812 |
| OLIGO_09020 | BF043000 | NSUN5     | -0.84   | 0.0074 | -0.7293 | 0.0151 |
| OLIGO_01710 | BF043001 | GPR126    | 0.0268  | 0.9576 | 0.3542  | 0.493  |
| OLIGO_08875 | BF043005 | PTD004    | 0.3613  | 0.3556 | 0.1956  | 0.6019 |
| OLIGO_04234 | BF043016 | LOC255783 | 0.5356  | 0.1356 | 0.3296  | 0.3378 |
| OLIGO_11493 | BF043025 | CMPK      | 0.8391  | 0.0075 | 0.7943  | 0.0082 |
| OLIGO_03536 | BF043026 | SLC27A1   | 0.5084  | 0.3813 | -0.0682 | 0.9021 |
| OLIGO_04237 | BF043032 | DNAJA5    | 0.9321  | 0.0034 | 0.0644  | 0.8327 |
| OLIGO_09348 | BF043033 | UNC13D    | -0.0982 | 0.7799 | -0.0803 | 0.8117 |
| OLIGO_04729 | BF043035 | COPS3     | 0.2959  | 0.2432 | 0.1081  | 0.6565 |
| OLIGO_09723 | BF043051 | EIF3S12   | 0.0222  | 0.9284 | 0.1684  | 0.4752 |
| OLIGO_05075 | BF043052 | UBLCP1    | 0.214   | 0.6132 | 0.9627  | 0.0186 |
| OLIGO_05080 | BF043054 | ETF1      | 0.0547  | 0.8446 | 0.149   | 0.5765 |
| OLIGO_05079 | BF043056 | PTPN23    | -0.003  | 0.992  | -0.0885 | 0.759  |
| OLIGO_04661 | BF043067 | ARHGEF3   | -0.3252 | 0.5706 | -0.233  | 0.6717 |
| OLIGO_04663 | BF043070 | MGC17624  | -0.7554 | 0.1317 | -0.3398 | 0.4419 |
| OLIGO_08914 | BF043072 | RAB34     | -0.3248 | 0.4121 | 0.1377  | 0.717  |
| OLIGO_04658 | BF043077 | SCRIB     | -0.2571 | 0.2987 | -0.3028 | 0.2003 |
| OLIGO_04659 | BF043079 | ITSN1     | -0.6579 | 0.0288 | -0.2441 | 0.3988 |
| OLIGO_04656 | BF043085 | INTS5     | 0.363   | 0.2721 | -0.0201 | 0.9494 |
| OLIGO_11294 | BF043088 | ALMS1     | -0.2959 | 0.3454 | -0.1811 | 0.5443 |
| OLIGO_08913 | BF043090 | DHX34     | -0.3878 | 0.5723 | -0.2314 | 0.7309 |
| OLIGO_02185 | BF043095 | NFAT5     | 0.4561  | 0.2359 | 0.5688  | 0.1233 |

|             |          |           |         |        |         |        |
|-------------|----------|-----------|---------|--------|---------|--------|
| OLIGO_09310 | BF043099 | GSTK1     | -2.3801 | 0.0017 | -1.2352 | 0.0879 |
| OLIGO_01756 | BF043107 | MASA      | 1.1825  | 0.0064 | 0.9992  | 0.016  |
| OLIGO_10590 | BF043110 | RPL23     | 0.3771  | 0.4388 | 0.1622  | 0.7273 |
| OLIGO_08830 | BF043113 | KCNK1     | -0.2271 | 0.5191 | 0.1799  | 0.5926 |
| OLIGO_09307 | BF043118 | TXNDC5    | 0.0873  | 0.8085 | 0.2457  | 0.4753 |
| OLIGO_04653 | BF043121 | STK17B    | 1.7713  | 0.0013 | 0.7496  | 0.1528 |
| OLIGO_09308 | BF043130 | HSPBAP1   | -0.7871 | 0.1129 | -0.2478 | 0.6023 |
| OLIGO_04660 | BF043133 | FRAG1     | 0.5779  | 0.3931 | 0.65    | 0.3316 |
| OLIGO_11675 | BF043134 | SS18L2    | -0.6177 | 0.0649 | -0.0321 | 0.9203 |
| OLIGO_09082 | BF043136 | EPPB9     | -0.5154 | 0.2972 | -0.2306 | 0.6266 |
| OLIGO_04655 | BF043141 | GPR107    | -0.1253 | 0.7467 | -0.2731 | 0.4762 |
| OLIGO_04171 | BF043142 | CNNM4     | -0.3483 | 0.2818 | -0.0277 | 0.9225 |
| OLIGO_09427 | BF043143 | ARHGAP29  | -0.5403 | 0.2531 | -0.3313 | 0.4646 |
| OLIGO_04172 | BF043145 | LOC617548 | 0.5878  | 0.1949 | 0.2771  | 0.5236 |
| OLIGO_02513 | BF043146 | LOC196463 | 1.0673  | 0.0193 | 0.4334  | 0.3205 |
| OLIGO_04173 | BF043147 | YARS      | 0.4805  | 0.1582 | 0.2628  | 0.4204 |
| OLIGO_04175 | BF043148 | EMILIN1   | -0.5543 | 0.3084 | -0.3187 | 0.5474 |
| OLIGO_04176 | BF043150 | USP47     | -0.3246 | 0.3347 | 0.2186  | 0.4975 |
| OLIGO_04178 | BF043154 | CALD1     | -0.7101 | 0.0928 | 0.1059  | 0.792  |
| OLIGO_04174 | BF043158 | CDKL5     | -0.001  | 0.9985 | 0.1425  | 0.7891 |
| OLIGO_08976 | BF043162 | LOC515511 | -0.7818 | 0.2062 | -0.4207 | 0.4777 |
| OLIGO_06820 | BF043165 | PAIP2     | 0.1967  | 0.6028 | 0.3746  | 0.2993 |
| OLIGO_10867 | BF043167 | CLIC4     | 0.4241  | 0.2391 | -0.161  | 0.641  |
| OLIGO_04179 | BF043168 | NEK2      | 0.1771  | 0.5848 | 0.3835  | 0.2164 |
| OLIGO_06905 | BF043177 | ZNF9      | 1.1005  | 0.0195 | 0.2799  | 0.5343 |
| OLIGO_09354 | BF043180 | BLOC1S1   | 0.0451  | 0.9072 | -0.0043 | 0.9907 |
| OLIGO_11485 | BF043183 | RAN       | 0.1781  | 0.7771 | 0.1333  | 0.8251 |
| OLIGO_01236 | BF043185 | ATF4      | 0.7623  | 0.1143 | 0.8963  | 0.0529 |
| OLIGO_05082 | BF043196 | MLL3      | -0.0438 | 0.9281 | 0.2708  | 0.5613 |
| OLIGO_05084 | BF043207 | TRMT1     | -0.1201 | 0.7901 | 0.0904  | 0.8344 |
| OLIGO_05086 | BF043208 | TSR1      | 0.1843  | 0.5501 | -0.4126 | 0.1654 |
| OLIGO_08300 | BF043214 | MKNK1     | 0.1195  | 0.7328 | 0.2523  | 0.4523 |
| OLIGO_05077 | BF043217 | SPATA20   | 0.6617  | 0.1019 | 0.1171  | 0.7624 |
| OLIGO_05078 | BF043219 | RAB1A     | -0.9666 | 0.1247 | -0.5395 | 0.371  |
| OLIGO_08738 | BF043224 | GATA6     | -2.3886 | 0.042  | -1.2082 | 0.2592 |
| OLIGO_04585 | BF043244 | CPT2      | -0.7023 | 0.0975 | 0.0764  | 0.8514 |
| OLIGO_04934 | BF043246 | ARL6IP4   | 0.0373  | 0.9554 | 0.0379  | 0.954  |
| OLIGO_09219 | BF043252 | SEC14L1   | 0.8001  | 0.0301 | 0.6268  | 0.076  |
| OLIGO_04587 | BF043254 | LOC651423 | -0.1209 | 0.7363 | 0.2269  | 0.51   |
| OLIGO_00586 | BF043255 | NRAS      | 0.1104  | 0.7589 | -0.0252 | 0.9417 |
| OLIGO_04589 | BF043259 | KIAA0467  | 0.0516  | 0.871  | -0.006  | 0.9843 |
| OLIGO_04588 | BF043260 | DERL2     | -0.2036 | 0.5203 | 0.0312  | 0.9181 |
| OLIGO_11636 | BF043262 | TOLLIP    | 0.4028  | 0.2124 | 0.5523  | 0.0748 |
| OLIGO_04586 | BF043264 | LOC124491 | 0.8228  | 0.0221 | 0.5908  | 0.0847 |
| OLIGO_09265 | BF043271 | ZNF75     | 0.3624  | 0.3162 | 0.1648  | 0.6324 |
| OLIGO_09030 | BF043272 | GOSR2     | -0.4057 | 0.3287 | 0.0424  | 0.9125 |
| OLIGO_04580 | BF043284 | PWP2H     | -0.6738 | 0.2387 | -0.4482 | 0.4039 |
| OLIGO_09268 | BF043289 | PPM1K     | 0.9621  | 0.0023 | 0.3765  | 0.2111 |
| OLIGO_04577 | BF043290 | SLC35E2   | 0.1387  | 0.6452 | -0.0716 | 0.8042 |
| OLIGO_10439 | BF043291 | DYNLT1    | -0.5096 | 0.1494 | 0.016   | 0.9621 |
| OLIGO_04582 | BF043297 | MYO6      | 1.0092  | 0.0641 | 0.6066  | 0.2453 |
| OLIGO_04576 | BF043307 | NAALADL2  | -1.2699 | 0.0161 | -0.6149 | 0.2214 |
| OLIGO_09267 | BF043308 | SCC-112   | -0.2433 | 0.6644 | -0.1575 | 0.7695 |
| OLIGO_06864 | BF043310 | Pafah1b2  | 0.1682  | 0.4828 | 0.0673  | 0.7694 |
| OLIGO_10341 | BF043315 | STIM1     | -0.0498 | 0.8908 | 0.4412  | 0.2004 |

|             |          |           |         |        |         |        |
|-------------|----------|-----------|---------|--------|---------|--------|
| OLIGO_04182 | BF043327 | RND2      | -0.3208 | 0.3925 | -0.0225 | 0.95   |
| OLIGO_07090 | BF043328 | PRMT7     | -0.0695 | 0.8315 | -0.0669 | 0.8309 |
| OLIGO_04595 | BF043345 | KIAA0999  | 0.5749  | 0.0186 | 0.1021  | 0.6605 |
| OLIGO_10897 | BF043352 | MGC134073 | -0.1775 | 0.6602 | -0.3326 | 0.3906 |
| OLIGO_09271 | BF043358 | TLE4      | 0.25    | 0.8534 | 0.0873  | 0.9478 |
| OLIGO_04592 | BF043359 | MAPRE2    | -0.1006 | 0.7469 | -0.0661 | 0.8244 |
| OLIGO_06505 | BF043366 | SLC26A2   | -0.2291 | 0.6054 | -0.2166 | 0.6163 |
| OLIGO_06509 | BF043369 | ITFG3     | -0.0574 | 0.8932 | -0.2897 | 0.4799 |
| OLIGO_11277 | BF043382 | NUP98     | 0.1735  | 0.6014 | 0.0788  | 0.807  |
| OLIGO_08020 | BF043383 | CYP20A1   | -0.2598 | 0.3374 | 0.0707  | 0.7862 |
| OLIGO_04098 | BF043403 | CENTB1    | 0.1349  | 0.8141 | 0.0962  | 0.8624 |
| OLIGO_04096 | BF043409 | DDX46     | -0.0961 | 0.8002 | 0.3161  | 0.3852 |
| OLIGO_06751 | BF043418 | LXN       | -0.1583 | 0.6304 | 0.3624  | 0.2482 |
| OLIGO_09023 | BF043421 | KLF15     | -0.6647 | 0.0513 | -0.3729 | 0.251  |
| OLIGO_06490 | BF043423 | SLC10A1   | -0.3854 | 0.3452 | -0.2871 | 0.4632 |
| OLIGO_09201 | BF043429 | TBCD      | -0.418  | 0.1664 | -0.1228 | 0.6699 |
| OLIGO_05017 | BF043437 | ZNF217    | 0.0649  | 0.8485 | 0.0199  | 0.9513 |
| OLIGO_05011 | BF043439 | TPK1      | -1.1939 | 0.0891 | -0.8983 | 0.1819 |
| OLIGO_05014 | BF043447 | IDH3G     | 0.5035  | 0.1379 | 0.1616  | 0.6191 |
| OLIGO_05013 | BF043448 | SFT2D1    | 0.2132  | 0.5944 | 0.4692  | 0.2192 |
| OLIGO_07532 | BF043450 | C1orf123  | -0.3372 | 0.2443 | -0.2361 | 0.3924 |
| OLIGO_06971 | BF043452 | GEFT      | -0.5079 | 0.1102 | -0.347  | 0.2548 |
| OLIGO_09486 | BF043454 | GCHFR     | 0.2656  | 0.4696 | 0.5788  | 0.1022 |
| OLIGO_11144 | BF043455 | PSMC6     | -0.1955 | 0.6134 | -0.0692 | 0.852  |
| OLIGO_10747 | BF043458 | RABGGTB   | 0.2168  | 0.6882 | 0.9443  | 0.0689 |
| OLIGO_05015 | BF043465 | AK1       | 0.3637  | 0.3545 | 0.2177  | 0.562  |
| OLIGO_01077 | BF043470 | ACTR2     | -0.1911 | 0.7473 | -0.0134 | 0.9812 |
| OLIGO_05012 | BF043474 | C1orf27   | -0.6132 | 0.1239 | -0.0323 | 0.9323 |
| OLIGO_05019 | BF043478 | FLJ21816  | 0.5808  | 0.2944 | 0.2889  | 0.5739 |
| OLIGO_08882 | BF043494 | CBFA2T3   | 0.8091  | 0.0516 | 0.5814  | 0.1338 |
| OLIGO_04594 | BF043496 | ENTPD4    | 0.7581  | 0.0296 | 0.2063  | 0.536  |
| OLIGO_08928 | BF043497 | LOC506943 | -1.1299 | 0.1676 | -1.1786 | 0.1334 |
| OLIGO_01908 | BF043508 | RALB      | -0.1194 | 0.7041 | 0.6133  | 0.1602 |
| OLIGO_08992 | BF043512 | CREB5     | 0.1905  | 0.6309 | 0.2338  | 0.5379 |
| OLIGO_04590 | BF043514 | KIAA0179  | -0.0523 | 0.9084 | 0.0876  | 0.8438 |
| OLIGO_04593 | BF043518 | BCL9L     | -0.1611 | 0.6564 | -0.1116 | 0.7478 |
| OLIGO_04521 | BF043527 | ZNF42     | 0.3008  | 0.5472 | -0.3518 | 0.476  |
| OLIGO_09597 | BF043535 | ASS       | 1.4207  | 0.0013 | 0.4391  | 0.2932 |
| OLIGO_04108 | BF043536 | OSBP2     | 0.2768  | 0.5981 | 0.0547  | 0.9135 |
| OLIGO_08931 | BF043547 | TIMP1     | 0.2102  | 0.7713 | 0.0673  | 0.9242 |
| OLIGO_04110 | BF043548 | COQ9      | -0.0425 | 0.8761 | 0.2136  | 0.4142 |
| OLIGO_04105 | BF043562 | PSD3      | 0.0511  | 0.8763 | 0.4688  | 0.1354 |
| OLIGO_04104 | BF043565 | NCKIPSD   | 0.2539  | 0.3296 | 0.0601  | 0.8067 |
| OLIGO_00043 | BF043567 | ETFA      | 0.2974  | 0.2601 | 0.3392  | 0.1793 |
| OLIGO_04102 | BF043570 | FBXL10    | 0.023   | 0.9779 | -0.3822 | 0.6415 |
| OLIGO_11148 | BF043574 | EIF2S3    | 0.7003  | 0.1813 | -0.4943 | 0.3249 |
| OLIGO_04111 | BF043575 | TRMU      | 0.5481  | 0.2987 | 1.0452  | 0.0695 |
| OLIGO_11469 | BF043576 | ME2       | 1.2255  | 0.0224 | 0.6893  | 0.1172 |
| OLIGO_04106 | BF043586 | C3orf38   | -0.4253 | 0.2746 | 0.1598  | 0.6683 |
| OLIGO_11470 | BF043598 | RGS20     | 0.1864  | 0.5728 | -0.1039 | 0.743  |
| OLIGO_08881 | BF043599 | ATAD4     | 0.1608  | 0.6818 | 0.2923  | 0.4329 |
| OLIGO_02628 | BF043601 | RBM10     | -0.0212 | 0.9419 | 0.1345  | 0.6415 |
| OLIGO_05018 | BF043620 | HK2       | 0.7287  | 0.0726 | 0.2393  | 0.536  |
| OLIGO_08380 | BF043621 | PYGO2     | 0.0826  | 0.6945 | 0.0562  | 0.7814 |
| OLIGO_09452 | BF043630 | MKRN1     | -0.4494 | 0.1618 | -0.1306 | 0.6695 |

|             |          |               |         |        |         |        |
|-------------|----------|---------------|---------|--------|---------|--------|
| OLIGO_09453 | BF043635 | PVR           | 1.0828  | 0.0237 | 0.4379  | 0.3433 |
| OLIGO_04960 | BF043640 | C18orf22      | -0.0682 | 0.8741 | -0.169  | 0.6821 |
| OLIGO_04532 | BF043647 | MGC4268       | 0.3035  | 0.4745 | 0.2336  | 0.5659 |
| OLIGO_04531 | BF043649 | SOX15         | -0.5291 | 0.3678 | -0.3889 | 0.4919 |
| OLIGO_04527 | BF043654 | UBE2D4        | 0.0666  | 0.8925 | -0.1408 | 0.7659 |
| OLIGO_04526 | BF043656 | RFX1          | 0.4187  | 0.3343 | -0.0936 | 0.8218 |
| OLIGO_11176 | BF043659 | MGC137753     | -0.0515 | 0.8927 | 0.2186  | 0.5506 |
| OLIGO_09835 | BF043660 | EEF1D         | 0.2883  | 0.5513 | 0.2158  | 0.6418 |
| OLIGO_09234 | BF043663 | C18orf25      | 0.0522  | 0.8693 | 0.1028  | 0.7351 |
| OLIGO_09237 | BF043671 | PPIH          | -0.4608 | 0.1775 | 0.1771  | 0.5881 |
| OLIGO_08828 | BF043677 | KIF26A        | -1.0861 | 0.0047 | -0.6825 | 0.0631 |
| OLIGO_09368 | BF043680 | C3orf10       | -0.2023 | 0.6067 | -0.288  | 0.4447 |
| OLIGO_04520 | BF043681 | LYZ           | -1.6426 | 0.0713 | -0.4053 | 0.633  |
| OLIGO_04518 | BF043684 | CDYL          | -1.266  | 0.2065 | -1.4052 | 0.1836 |
| OLIGO_04523 | BF043688 | TMEM16H       | 1.2006  | 0.1451 | 0.6115  | 0.426  |
| OLIGO_07655 | BF043697 | ODC1          | 1.1668  | 0.019  | 0.7153  | 0.1318 |
| OLIGO_04525 | BF043705 | LPAAT-THETA   | -0.5577 | 0.3036 | -0.2347 | 0.6502 |
| OLIGO_04529 | BF043709 | DPP9          | 0.2594  | 0.4228 | 0.2112  | 0.4961 |
| OLIGO_07341 | BF043710 | BCAR3         | 0.1892  | 0.7145 | 0.2486  | 0.6162 |
| OLIGO_04522 | BF043717 | LOC55565      | -0.5537 | 0.1145 | -0.3077 | 0.3577 |
| OLIGO_04075 | BF043719 | PHOSPHO1      | -0.3937 | 0.3936 | -0.2508 | 0.5708 |
| OLIGO_08894 | BF043720 | TBC1D8        | 0.0144  | 0.9709 | 0.4169  | 0.2724 |
| OLIGO_06430 | BF043722 | IFNGR2        | 0.5004  | 0.289  | 0.6116  | 0.1767 |
| OLIGO_12255 | BF043729 | MDH1          | 0.0261  | 0.9366 | 0.4301  | 0.1755 |
| OLIGO_08896 | BF043732 | LHFP          | 0.6349  | 0.3409 | 0.694   | 0.2917 |
| OLIGO_07251 | BF043734 | MTMR4         | -0.3139 | 0.3734 | -0.3557 | 0.2928 |
| OLIGO_06482 | BF043738 | TKT           | 0.8033  | 0.0882 | 0.2201  | 0.6256 |
| OLIGO_06465 | BF043744 | NPNT          | -1.3872 | 0.0257 | -0.8997 | 0.135  |
| OLIGO_06432 | BF043749 | ADFP          | -0.3874 | 0.4377 | -0.6661 | 0.1678 |
| OLIGO_06841 | BF043760 | HNRPA0        | -0.2314 | 0.5209 | 0.2181  | 0.5332 |
| OLIGO_04964 | BF043762 | KIAA1128      | -0.118  | 0.7012 | -0.1563 | 0.5948 |
| OLIGO_04965 | BF043765 | DKFZP686M0199 | -0.1241 | 0.7305 | -0.027  | 0.9376 |
| OLIGO_04966 | BF043775 | BPI           | -0.5192 | 0.488  | -0.8066 | 0.2552 |
| OLIGO_11420 | BF043779 | SEN3          | -0.2782 | 0.4131 | 0.1935  | 0.5509 |
| OLIGO_08968 | BF043784 | SEN6          | -0.1209 | 0.6876 | 0.1501  | 0.6026 |
| OLIGO_04959 | BF043796 | FLJ37440      | -0.2015 | 0.5544 | -0.053  | 0.8707 |
| OLIGO_04961 | BF043801 | C15orf23      | 0.3415  | 0.2086 | -0.0776 | 0.7646 |
| OLIGO_04962 | BF043803 | MCRS1         | 0.5075  | 0.202  | 0.5681  | 0.1365 |
| OLIGO_04957 | BF043805 | PCF11         | -0.857  | 0.0329 | -0.2481 | 0.5164 |
| OLIGO_07696 | BF043814 | CBL           | 0.1015  | 0.8027 | 0.2943  | 0.4501 |
| OLIGO_09189 | BF043815 | JAG2          | -0.0928 | 0.7592 | -0.0998 | 0.7303 |
| OLIGO_09036 | BF043830 | GABARAPL1     | 1.0274  | 0.0102 | 0.9281  | 0.0155 |
| OLIGO_09742 | BF043867 | FLJ38663      | 0.0333  | 0.8752 | 0.2326  | 0.2509 |
| OLIGO_06449 | BF043883 | PSPH          | 2.0767  | 0.0001 | 1.5961  | 0.0021 |
| OLIGO_06438 | BF043887 | SYNGR1        | 0.4865  | 0.2479 | -0.9067 | 0.0265 |
| OLIGO_04076 | BF043889 | ENPP1         | -2.2439 | 0.0037 | -0.4045 | 0.584  |
| OLIGO_03331 | BF043890 | YTHDC1        | 0.4427  | 0.082  | 0.1176  | 0.6287 |
| OLIGO_06471 | BF043894 | APITD1        | -0.084  | 0.7787 | 0.0649  | 0.8196 |
| OLIGO_06464 | BF043899 | DCXR          | 0.2042  | 0.5564 | -0.1392 | 0.6741 |
| OLIGO_01438 | BF043904 | KIAA0101      | 1.2033  | 0.0145 | 0.9137  | 0.0512 |
| OLIGO_08838 | BF043910 | PSEN2         | -0.5912 | 0.1438 | -0.0237 | 0.9512 |
| OLIGO_11684 | BF043911 | ZFP95         | -1.1171 | 0.1021 | -0.6283 | 0.3371 |
| OLIGO_08861 | BF043912 | ANKRD15       | 0.622   | 0.0092 | 0.1266  | 0.579  |
| OLIGO_10779 | BF043914 | TIMM23        | -0.6913 | 0.2335 | 0.225   | 0.672  |
| OLIGO_08846 | BF043915 | C3orf21       | -1.0488 | 0.1791 | -0.9034 | 0.2272 |

|             |          |           |         |        |         |        |
|-------------|----------|-----------|---------|--------|---------|--------|
| OLIGO_08841 | BF043916 | TADA1L    | 0.6558  | 0.0186 | 0.2997  | 0.2595 |
| OLIGO_08840 | BF043917 | GPATC1    | -0.0658 | 0.7676 | -0.1508 | 0.4777 |
| OLIGO_05126 | BF043931 | IGF2BP3   | -0.7487 | 0.1715 | -0.6221 | 0.2359 |
| OLIGO_11772 | BF043937 | KCTD18    | -0.0514 | 0.9043 | 0.0125  | 0.9759 |
| OLIGO_04891 | BF043938 | TSPAN17   | -1.3876 | 0.0224 | -0.7008 | 0.2239 |
| OLIGO_04892 | BF043942 | TAX1BP3   | -0.2294 | 0.3485 | -0.1916 | 0.4138 |
| OLIGO_09199 | BF043945 | LMBR1     | -0.4214 | 0.224  | -0.0067 | 0.984  |
| OLIGO_04890 | BF043948 | ETS1      | 1.9862  | 0      | 0.8475  | 0.0702 |
| OLIGO_04885 | BF043954 | HDAC7A    | 0.6235  | 0.0855 | 0.4224  | 0.2227 |
| OLIGO_07362 | BF043955 | CDC26     | 0.838   | 0.4333 | 0.7818  | 0.46   |
| OLIGO_03481 | BF043956 | ACAS2L    | 0.5186  | 0.4777 | 0.4446  | 0.5255 |
| OLIGO_04886 | BF043957 | CLDND1    | -0.0717 | 0.8681 | 0.2456  | 0.5532 |
| OLIGO_09422 | BF043961 | Prkar2a   | -0.1547 | 0.6379 | 0.0955  | 0.7612 |
| OLIGO_04887 | BF043962 | BCL2L13   | 0.0956  | 0.8169 | -0.0625 | 0.8745 |
| OLIGO_04895 | BF043966 | BAT3      | -0.5542 | 0.1533 | -0.6718 | 0.0712 |
| OLIGO_07867 | BF043967 | TRIP10    | -0.5857 | 0.1899 | -0.3815 | 0.3633 |
| OLIGO_06676 | BF043968 | MRPL41    | 0.2736  | 0.4714 | 0.3959  | 0.3024 |
| OLIGO_07901 | BF043971 | FBXO3     | -0.1586 | 0.593  | 0.032   | 0.9104 |
| OLIGO_09423 | BF043973 | RASGRP2   | 0.1127  | 0.7669 | 0.0871  | 0.8108 |
| OLIGO_09420 | BF043981 | GAMT      | -1.2105 | 0.0221 | -0.6087 | 0.229  |
| OLIGO_09421 | BF043988 | LOC515176 | 0.0055  | 0.9854 | 0.0049  | 0.9864 |
| OLIGO_04893 | BF043991 | C1orf172  | 0.5133  | 0.0634 | 0.1875  | 0.4764 |
| OLIGO_06715 | BF043994 | MRPL42    | -0.1672 | 0.6883 | 0.1408  | 0.7245 |
| OLIGO_08292 | BF043996 | MTHFD1    | 0.5952  | 0.1687 | 0.8181  | 0.0478 |
| OLIGO_04387 | BF044009 | SEC24D    | 0.3675  | 0.2878 | 0.2155  | 0.5155 |
| OLIGO_07165 | BF044010 | MFAP4     | 0.0464  | 0.8876 | -0.3513 | 0.2644 |
| OLIGO_04388 | BF044011 | C9orf91   | -0.1465 | 0.7145 | -0.2315 | 0.5451 |
| OLIGO_04389 | BF044013 | IER3IP1   | -0.0852 | 0.7871 | -0.0448 | 0.8832 |
| OLIGO_04392 | BF044029 | Elf4      | 0.619   | 0.3104 | 0.6233  | 0.3005 |
| OLIGO_01376 | BF044038 | PIP5K1A   | 0.2938  | 0.3086 | 0.2671  | 0.3344 |
| OLIGO_08849 | BF044050 | SYT4      | 0.1445  | 0.8036 | 0.0914  | 0.8697 |
| OLIGO_08842 | BF044052 | LIMK2     | -0.6222 | 0.1673 | -0.4179 | 0.3325 |
| OLIGO_08844 | BF044056 | TADA3L    | -0.2314 | 0.6736 | -0.0991 | 0.8506 |
| OLIGO_08864 | BF044063 | SERPINB5  | -0.5985 | 0.1956 | -0.26   | 0.5596 |
| OLIGO_08854 | BF044067 | PVT1      | 0.6846  | 0.1033 | 0.501   | 0.2116 |
| OLIGO_08859 | BF044073 | RBM33     | 0.2072  | 0.5264 | 0.0667  | 0.8314 |
| OLIGO_11544 | BF044077 | PRKAB1    | 0.1308  | 0.6686 | 0.1272  | 0.6641 |
| OLIGO_07050 | BF044078 | NAV2      | -0.9195 | 0.0493 | -0.2916 | 0.5184 |
| OLIGO_08857 | BF044082 | TCEB3     | -0.1328 | 0.7958 | 0.0412  | 0.9342 |
| OLIGO_08837 | BF044100 | PDGFA     | 0.7561  | 0.02   | 0.5168  | 0.0933 |
| OLIGO_04902 | BF044105 | ZNF239    | 0.4582  | 0.3033 | 0.3974  | 0.3507 |
| OLIGO_04900 | BF044107 | METTTL7B  | -0.9441 | 0.2145 | -0.4128 | 0.5727 |
| OLIGO_04901 | BF044110 | COQ4      | 0.8617  | 0.0338 | -0.0658 | 0.8655 |
| OLIGO_11589 | BF044111 | AP1M1     | 0.6428  | 0.2273 | 0.7397  | 0.1474 |
| OLIGO_03950 | BF044128 | SULT1E1   | -1.012  | 0.3017 | -0.6739 | 0.4737 |
| OLIGO_04897 | BF044131 | DUSP14    | 0.7015  | 0.0499 | -0.2779 | 0.4171 |
| OLIGO_04898 | BF044135 | SCYE1     | 0.2993  | 0.3783 | -0.3217 | 0.3227 |
| OLIGO_08934 | BF044136 | LMBRD1    | 0.0476  | 0.897  | 0.4271  | 0.2261 |
| OLIGO_09115 | BF044141 | LOC538963 | -0.5207 | 0.2033 | -0.0761 | 0.8461 |
| OLIGO_04906 | BF044143 | RNF141    | -0.1153 | 0.7686 | -0.0541 | 0.8853 |
| OLIGO_04905 | BF044145 | LOC517135 | -0.186  | 0.8044 | -0.2333 | 0.7521 |
| OLIGO_04899 | BF044151 | SHPRH     | 0.3675  | 0.6693 | -0.1077 | 0.8985 |
| OLIGO_11149 | BF044152 | MAPK3     | 0.0511  | 0.9141 | -0.2469 | 0.5984 |
| OLIGO_04903 | BF044155 | UNQ338    | -0.5819 | 0.1657 | -0.2109 | 0.6    |
| OLIGO_08930 | BF044158 | TCF15     | -0.1781 | 0.8978 | -0.5138 | 0.7088 |



|             |          |               |         |        |         |        |
|-------------|----------|---------------|---------|--------|---------|--------|
| OLIGO_07967 | BF044163 | MAPRE1        | 0.4173  | 0.4099 | 0.7563  | 0.1181 |
| OLIGO_04395 | BF044177 | MGC72075      | -0.3998 | 0.6741 | -0.0894 | 0.9228 |
| OLIGO_04394 | BF044178 | FLJ21106      | 0.2862  | 0.5173 | 0.4582  | 0.2799 |
| OLIGO_10844 | BF044179 | GRK5          | -0.2287 | 0.624  | -0.1106 | 0.804  |
| OLIGO_09541 | BF044183 | LOC537418     | 0.4474  | 0.1696 | 0.4906  | 0.114  |
| OLIGO_00617 | BF044199 | C1orf43       | 0.7338  | 0.0856 | 0.5409  | 0.186  |
| OLIGO_06353 | BF044215 | SCRN2         | -0.107  | 0.8047 | -0.6284 | 0.1303 |
| OLIGO_10846 | BF044216 | PKIB          | -1.3529 | 0.0321 | -0.4909 | 0.4068 |
| OLIGO_08770 | BF044220 | ZNF131        | -0.4313 | 0.284  | -0.3951 | 0.3039 |
| OLIGO_08754 | BF044230 | AP4S1         | -0.3844 | 0.3082 | 0.0576  | 0.8689 |
| OLIGO_06342 | BF044233 | TOR1AIP2      | -0.7891 | 0.1055 | -0.498  | 0.2862 |
| OLIGO_08771 | BF044239 | SYAP1         | -0.1426 | 0.6399 | 0.0944  | 0.7462 |
| OLIGO_06329 | BF044242 | FLJ10081      | -0.108  | 0.8843 | -0.5297 | 0.4657 |
| OLIGO_10991 | BF044244 | STRA6         | -1.0767 | 0.2477 | -0.1569 | 0.8606 |
| OLIGO_06328 | BF044245 | FKBP4         | -0.3851 | 0.4571 | -0.4764 | 0.3567 |
| OLIGO_10419 | BF044247 | RPL28         | 0.523   | 0.3897 | 0.5128  | 0.3813 |
| OLIGO_06334 | BF044250 | C1S           | 0.4101  | 0.3152 | -0.0524 | 0.8934 |
| OLIGO_06333 | BF044251 | C14orf46      | 0.1791  | 0.7342 | -0.6017 | 0.2345 |
| OLIGO_06302 | BF044261 | SGK3          | -0.3407 | 0.6571 | -0.1173 | 0.8739 |
| OLIGO_04015 | BF044263 | CCDC82        | 0.1751  | 0.5921 | 0.7433  | 0.0764 |
| OLIGO_06351 | BF044267 | ZC3H11A       | -0.7249 | 0.091  | -0.5129 | 0.212  |
| OLIGO_06352 | BF044268 | Lmo7          | -0.0236 | 0.9701 | -0.0324 | 0.9572 |
| OLIGO_06330 | BF044273 | RTTN          | 0.7983  | 0.0717 | -0.3961 | 0.3507 |
| OLIGO_06335 | BF044277 | LOC617475     | -0.4286 | 0.2283 | -0.4256 | 0.2121 |
| OLIGO_07540 | BF044279 | C10orf84      | -0.0441 | 0.8856 | 0.3778  | 0.1989 |
| OLIGO_04011 | BF044280 | PFDN4         | 0.7076  | 0.2967 | 0.3839  | 0.5546 |
| OLIGO_06309 | BF044284 | FLJ20551      | -0.2405 | 0.3242 | -0.2207 | 0.3432 |
| OLIGO_08776 | BF044285 | SPIRE1        | 0.2154  | 0.5663 | -0.0376 | 0.9168 |
| OLIGO_08775 | BF044286 | ECD           | -0.4823 | 0.2437 | -0.1757 | 0.6438 |
| OLIGO_11297 | BF044292 | CAPZB         | -0.0774 | 0.8511 | 0.2851  | 0.4689 |
| OLIGO_09230 | BF044297 | ZCSL2         | -0.1189 | 0.8047 | 0.0846  | 0.8545 |
| OLIGO_04831 | BF044304 | PLSCR1        | 0.7279  | 0.0181 | 0.4496  | 0.1282 |
| OLIGO_06590 | BF044310 | LAPTM4A       | 0.3094  | 0.3202 | 0.1083  | 0.7154 |
| OLIGO_04827 | BF044311 | ARL4C         | -0.4823 | 0.1643 | -0.1406 | 0.672  |
| OLIGO_06918 | BF044326 | MRPL20        | 0.5659  | 0.1686 | 0.3396  | 0.3887 |
| OLIGO_09144 | BF044334 | FYCO1         | -0.3221 | 0.4917 | -0.2074 | 0.6443 |
| OLIGO_04412 | BF044335 | ASB3          | -0.5126 | 0.1026 | -0.0932 | 0.7559 |
| OLIGO_03362 | BF044337 | PPA1          | 1.7745  | 0.0001 | 0.6941  | 0.1176 |
| OLIGO_03341 | BF044339 | GLS           | 0.6001  | 0.0579 | 0.4944  | 0.1036 |
| OLIGO_04408 | BF044355 | CDCP1         | -0.3887 | 0.2839 | -0.2434 | 0.4836 |
| OLIGO_04409 | BF044358 | C16orf57      | 0.4226  | 0.1727 | 0.0214  | 0.9426 |
| OLIGO_04410 | BF044360 | CXorf26       | -0.3656 | 0.3753 | -0.3221 | 0.4152 |
| OLIGO_04017 | BF044364 | connexin 26   | -0.1254 | 0.8721 | -0.0178 | 0.9809 |
| OLIGO_04829 | BF044371 | SURB7         | -0.4381 | 0.1874 | 0.0705  | 0.8247 |
| OLIGO_04826 | BF044372 | FAM49B        | 0.6327  | 0.0881 | 0.5775  | 0.1045 |
| OLIGO_04828 | BF044376 | RAB5B         | 0.7331  | 0.0418 | 0.5079  | 0.1409 |
| OLIGO_11556 | BF044377 | FSTL1         | -0.9176 | 0.189  | -0.2204 | 0.7429 |
| OLIGO_04825 | BF044382 | APXL2         | -0.1838 | 0.7521 | -0.2199 | 0.7007 |
| OLIGO_09100 | BF044383 | MOV10         | -0.306  | 0.5398 | -0.1494 | 0.7548 |
| OLIGO_08890 | BF044384 | 3110050K21Rik | -0.3752 | 0.4881 | -0.4537 | 0.3953 |
| OLIGO_09040 | BF044386 | CCDC52        | 0.1768  | 0.5045 | -0.0995 | 0.6934 |
| OLIGO_09242 | BF044391 | SRGAP2        | -0.1603 | 0.8383 | 0.1303  | 0.8648 |
| OLIGO_04830 | BF044395 | EXT2          | -0.1188 | 0.6008 | 0.0738  | 0.734  |
| OLIGO_07016 | BF044396 | IDH2          | 0.1425  | 0.6407 | -0.088  | 0.7644 |
| OLIGO_09393 | BF044397 | LOC653754     | -0.5435 | 0.4561 | -0.1696 | 0.8102 |

|             |          |               |         |        |         |        |
|-------------|----------|---------------|---------|--------|---------|--------|
| OLIGO_04823 | BF044401 | MAN2A2        | 0.1601  | 0.5685 | 0.1025  | 0.7022 |
| OLIGO_04822 | BF044402 | Syce2         | 1.6152  | 0.0106 | 0.8227  | 0.1729 |
| OLIGO_02076 | BF044403 | RAI14         | -0.3992 | 0.2866 | 0.3589  | 0.3169 |
| OLIGO_02136 | BF044404 | CANX          | 0.1886  | 0.6493 | 0.4742  | 0.2334 |
| OLIGO_09249 | BF044406 | SFRS11        | -0.1726 | 0.7059 | -0.0509 | 0.9081 |
| OLIGO_01056 | BF044412 | MTCH2         | 0.8542  | 0.004  | 0.4692  | 0.0973 |
| OLIGO_00795 | BF044413 | COMMD7        | -0.861  | 0.1743 | -0.0867 | 0.8865 |
| OLIGO_02617 | BF044423 | LOC134147     | -0.29   | 0.4917 | 0.1947  | 0.6317 |
| OLIGO_04405 | BF044426 | RSRC1         | 0.1994  | 0.5246 | 0.761   | 0.0112 |
| OLIGO_04406 | BF044427 | CEP290        | -1.9727 | 0.0717 | -1.3137 | 0.1848 |
| OLIGO_04407 | BF044429 | FLJ21687      | -0.758  | 0.0587 | -0.2642 | 0.4911 |
| OLIGO_04398 | BF044431 | PBX2          | -0.3916 | 0.3155 | 0.1246  | 0.7388 |
| OLIGO_08044 | BF044433 | PARL          | -0.2266 | 0.4584 | 0.102   | 0.7233 |
| OLIGO_11548 | BF044435 | ISYNA1        | -0.573  | 0.1794 | -0.5175 | 0.203  |
| OLIGO_04402 | BF044437 | CRIM1         | 0.0274  | 0.9255 | -0.1684 | 0.5478 |
| OLIGO_04400 | BF044444 | EIF2B1        | 0.2426  | 0.4074 | -0.1006 | 0.7191 |
| OLIGO_04399 | BF044445 | DTNBP1        | -0.026  | 0.9646 | -0.2381 | 0.6809 |
| OLIGO_08309 | BF044448 | UMPS          | -0.4171 | 0.2946 | 0.2495  | 0.5129 |
| OLIGO_04023 | BF044453 | NCBP1         | -0.4205 | 0.4672 | 0.2124  | 0.705  |
| OLIGO_08781 | BF044457 | ZNF652        | 0.1249  | 0.606  | 0.3804  | 0.0986 |
| OLIGO_04022 | BF044458 | ATXN1         | -1.0208 | 0.0381 | -0.4703 | 0.3157 |
| OLIGO_06355 | BF044464 | RPL5          | -0.2347 | 0.3714 | -0.2203 | 0.3812 |
| OLIGO_08777 | BF044467 | TMEM126B      | -0.3593 | 0.3661 | -0.255  | 0.5035 |
| OLIGO_06363 | BF044475 | TUG1          | -0.1549 | 0.5744 | -0.0011 | 0.9968 |
| OLIGO_06362 | BF044476 | RAB25         | -1.2337 | 0.1845 | -0.2644 | 0.7623 |
| OLIGO_09958 | BF044492 | ZNF655        | 0.1455  | 0.7364 | 0.1866  | 0.6556 |
| OLIGO_04327 | BF044502 | SLC20A1       | 0.5961  | 0.2075 | -0.1366 | 0.763  |
| OLIGO_04328 | BF044503 | TMEM12        | 0.4566  | 0.3098 | 0.0929  | 0.83   |
| OLIGO_04335 | BF044511 | MGC16372      | -0.2051 | 0.5195 | -0.4501 | 0.1405 |
| OLIGO_11515 | BF044514 | OCLN          | -0.3672 | 0.5492 | -0.0413 | 0.9439 |
| OLIGO_04330 | BF044515 | SSBP1         | -0.2951 | 0.3992 | 0.0531  | 0.8743 |
| OLIGO_04333 | BF044520 | LZIC          | -0.0809 | 0.8481 | -0.4778 | 0.2905 |
| OLIGO_04429 | BF044527 | TRIM25        | 1.2724  | 0.0002 | 0.1325  | 0.6755 |
| OLIGO_07856 | BF044530 | EPN1          | 0.0308  | 0.9125 | -0.0485 | 0.8574 |
| OLIGO_07693 | BF044531 | CBX1          | -0.9656 | 0.0047 | -0.2162 | 0.5061 |
| OLIGO_11285 | BF044532 | SCD           | 0.1221  | 0.7908 | 0.2233  | 0.6125 |
| OLIGO_04322 | BF044536 | 2610001J05Rik | -1.4406 | 0.0348 | -0.9272 | 0.156  |
| OLIGO_07647 | BF044539 | LOC525795     | -0.0507 | 0.8658 | 0.1888  | 0.5115 |
| OLIGO_04326 | BF044545 | LOC514660     | 0.31    | 0.597  | 0.1727  | 0.7598 |
| OLIGO_09112 | BF044546 | KLHDC2        | -0.1015 | 0.8307 | 0.1318  | 0.7722 |
| OLIGO_06524 | BF044548 | RPN2          | -0.2777 | 0.7439 | -0.5673 | 0.4865 |
| OLIGO_09106 | BF044555 | SAP30L        | -0.573  | 0.4258 | -1.0646 | 0.1324 |
| OLIGO_04323 | BF044556 | OSBPL10       | -0.6769 | 0.2083 | -0.3597 | 0.4853 |
| OLIGO_04019 | BF044560 | PLCB4         | -0.0504 | 0.9088 | 0.001   | 0.9982 |
| OLIGO_04021 | BF044563 | ALOX5AP       | 0.1295  | 0.7721 | 0.2914  | 0.5099 |
| OLIGO_10737 | BF044566 | ATP6V0A1      | 0.0941  | 0.8637 | 0.2807  | 0.5889 |
| OLIGO_04025 | BF044574 | BCL6B         | -0.3821 | 0.5283 | -0.288  | 0.6266 |
| OLIGO_11206 | BF044582 | DUS3L         | 0.0577  | 0.8276 | 0.2661  | 0.2963 |
| OLIGO_01414 | BF044584 | SETMAR        | -0.2082 | 0.3692 | -0.0729 | 0.7424 |
| OLIGO_06272 | BF044586 | NFKBIB        | 0.2787  | 0.51   | 0.0773  | 0.849  |
| OLIGO_11434 | BF044606 | LOXL1         | 0.3175  | 0.5116 | -0.164  | 0.7177 |
| OLIGO_04761 | BF044609 | C1orf210      | 0.2601  | 0.7206 | -0.1335 | 0.8526 |
| OLIGO_04765 | BF044618 | RGS12         | -0.2979 | 0.3963 | -0.0783 | 0.8159 |
| OLIGO_08906 | BF044625 | SLC4A3        | -0.1515 | 0.6129 | 0.1585  | 0.5793 |
| OLIGO_04764 | BF044628 | CDK7          | -0.8418 | 0.0659 | -0.0371 | 0.9332 |

|             |          |           |         |        |         |        |
|-------------|----------|-----------|---------|--------|---------|--------|
| OLIGO_09312 | BF044630 | PABPC4    | 0.6613  | 0.2159 | -0.1726 | 0.7359 |
| OLIGO_04756 | BF044631 | FAM8A1    | 0.6065  | 0.0933 | 0.1896  | 0.5822 |
| OLIGO_09359 | BF044634 | MRPL55    | -0.0772 | 0.8209 | 0.3242  | 0.3218 |
| OLIGO_04759 | BF044638 | KLC2      | 0.3529  | 0.2825 | -0.016  | 0.9595 |
| OLIGO_04760 | BF044640 | PTPN2     | 0.1205  | 0.6488 | -0.0251 | 0.9207 |
| OLIGO_07307 | BF044643 | LOC533209 | -0.2097 | 0.6367 | -0.4843 | 0.2579 |
| OLIGO_06408 | BF044647 | GTF2H1    | -0.151  | 0.74   | 0.6839  | 0.1176 |
| OLIGO_08693 | BF044651 | SURF2     | 0.4519  | 0.215  | 0.2702  | 0.4392 |
| OLIGO_04755 | BF044664 | TMEM102   | -0.5302 | 0.5958 | -0.2925 | 0.7647 |
| OLIGO_09360 | BF044667 | PPFIA1    | -0.0824 | 0.8266 | 0.3118  | 0.3872 |
| OLIGO_04758 | BF044669 | LOC651894 | -0.575  | 0.1041 | -0.2372 | 0.4839 |
| OLIGO_04757 | BF044671 | SHC1      | -0.1676 | 0.5214 | 0.2994  | 0.2319 |
| OLIGO_04766 | BF044672 | MAT2A     | 0.3857  | 0.1577 | 0.3959  | 0.1303 |
| OLIGO_09963 | BF044673 | PUS1      | 0.7245  | 0.0896 | -0.331  | 0.4315 |
| OLIGO_09054 | BF044688 | Mcf2l     | 0.7118  | 0.0527 | 0.1908  | 0.5873 |
| OLIGO_04261 | BF044691 | FLJ20272  | -0.252  | 0.3419 | -0.0558 | 0.825  |
| OLIGO_07062 | BF044693 | FIS1      | 0.9203  | 0.1564 | 0.6373  | 0.3057 |
| OLIGO_09057 | BF044698 | CSRP2BP   | 0.0586  | 0.8711 | -0.0593 | 0.8636 |
| OLIGO_08737 | BF044699 | FEM1B     | -0.3246 | 0.5998 | -0.4259 | 0.4728 |
| OLIGO_10539 | BF044704 | PCMT1     | -0.0873 | 0.8607 | 0.4325  | 0.3645 |
| OLIGO_06255 | BF044715 | ITGA3     | 0.1783  | 0.7035 | 0.0143  | 0.9746 |
| OLIGO_09138 | BF044720 | EPS8L2    | 0.5195  | 0.4101 | 0.3632  | 0.544  |
| OLIGO_09997 | BF044726 | TDG       | 0.3029  | 0.478  | 0.2362  | 0.5706 |
| OLIGO_06251 | BF044727 | MED4      | 0.5807  | 0.0324 | 0.1412  | 0.5858 |
| OLIGO_06279 | BF044731 | DNAJA2    | 0.5177  | 0.0411 | 0.2584  | 0.2833 |
| OLIGO_10918 | BF044734 | CKAP5     | -0.285  | 0.4142 | -0.0638 | 0.8488 |
| OLIGO_06280 | BF044735 | CTDSPL2   | 0.1996  | 0.4693 | -0.1244 | 0.638  |
| OLIGO_02563 | BF044738 | PSMC4     | 0.3321  | 0.2862 | 0.5672  | 0.0571 |
| OLIGO_04000 | BF044741 | PLN       | -0.4088 | 0.3144 | -0.5266 | 0.1788 |
| OLIGO_06270 | BF044742 | RECQL5    | 0.0127  | 0.9688 | 0.2164  | 0.4867 |
| OLIGO_03996 | BF044744 | NFKBIZ    | -0.6327 | 0.355  | -0.696  | 0.3032 |
| OLIGO_10409 | BF044746 | RBM3      | 0.6294  | 0.1564 | 0.399   | 0.3483 |
| OLIGO_06233 | BF044748 | PTPRG     | -0.3771 | 0.4225 | -0.1141 | 0.801  |
| OLIGO_06232 | BF044749 | LOC530325 | -0.5348 | 0.4598 | -0.2498 | 0.717  |
| OLIGO_10941 | BF044751 | UNC119    | -0.1148 | 0.7408 | -0.0351 | 0.9161 |
| OLIGO_11288 | BF044752 | CYBA      | 0.6268  | 0.0435 | 0.5186  | 0.0807 |
| OLIGO_06244 | BF044757 | NUP107    | -0.0057 | 0.9881 | 0.3661  | 0.3176 |
| OLIGO_06243 | BF044762 | AIM1      | -0.0387 | 0.9069 | 0.3382  | 0.2885 |
| OLIGO_07254 | BF044765 | SNW1      | 0.1486  | 0.5499 | 0.2532  | 0.2884 |
| OLIGO_06289 | BF044767 | MRPS18A   | -0.0479 | 0.8761 | -0.0817 | 0.7817 |
| OLIGO_11051 | BF044769 | SON       | 0.4593  | 0.123  | 0.1897  | 0.5123 |
| OLIGO_06257 | BF044772 | CAMK2D    | 0.6785  | 0.0808 | 0.8665  | 0.0201 |
| OLIGO_03217 | BF044774 | GALNT11   | -0.2788 | 0.361  | -0.0866 | 0.7672 |
| OLIGO_04711 | BF044776 | UBE2A     | 0.0539  | 0.8965 | 0.0263  | 0.9475 |
| OLIGO_04712 | BF044778 | TIMM22    | -0.1878 | 0.5604 | -0.1338 | 0.6649 |
| OLIGO_04718 | BF044783 | FLJ10241  | 0.2439  | 0.5848 | -0.0149 | 0.9722 |
| OLIGO_08111 | BF044787 | DERL1     | 0.4531  | 0.3567 | 0.2672  | 0.5704 |
| OLIGO_04715 | BF044789 | FAM82C    | -0.1444 | 0.7004 | -0.0803 | 0.8233 |
| OLIGO_04717 | BF044791 | ZNF259    | 0.9704  | 0.0035 | 0.4554  | 0.1516 |
| OLIGO_11557 | BF044799 | TAF11     | -0.1235 | 0.6795 | 0.1479  | 0.6043 |
| OLIGO_04709 | BF044804 | SOX6      | -1.49   | 0.004  | -0.7753 | 0.1155 |
| OLIGO_09337 | BF044805 | SMURF1    | 0.4887  | 0.1232 | 0.2183  | 0.4722 |
| OLIGO_04710 | BF044806 | RBM19     | 0.0768  | 0.8887 | 0.2051  | 0.6966 |
| OLIGO_04707 | BF044809 | LOC155060 | 0.4288  | 0.4985 | 0.1876  | 0.7573 |
| OLIGO_04719 | BF044815 | BZRP      | 1.5359  | 0.0008 | 1.0233  | 0.0193 |

|             |          |           |         |        |         |        |
|-------------|----------|-----------|---------|--------|---------|--------|
| OLIGO_07211 | BF044816 | SFRS6     | 0.3371  | 0.3196 | 0.1989  | 0.5401 |
| OLIGO_04713 | BF044819 | C1orf121  | -0.8486 | 0.0651 | -0.2342 | 0.6005 |
| OLIGO_07955 | BF044821 | RNASEH2A  | 0.4166  | 0.2832 | 0.2973  | 0.4189 |
| OLIGO_04714 | BF044825 | POMGNT1   | 0.2543  | 0.6255 | -0.0058 | 0.9907 |
| OLIGO_04705 | BF044826 | GPR89A    | 0.1307  | 0.6774 | -0.5151 | 0.0873 |
| OLIGO_07636 | BF044830 | CHD8      | -0.2315 | 0.3955 | -0.1285 | 0.6233 |
| OLIGO_04266 | BF044835 | DIP2B     | 0.2547  | 0.4419 | 0.1571  | 0.6189 |
| OLIGO_09060 | BF044836 | Sharpin   | -0.0756 | 0.866  | -0.2367 | 0.5913 |
| OLIGO_07568 | BF044843 | PRKCDBP   | -0.4455 | 0.4924 | -0.1164 | 0.8554 |
| OLIGO_04265 | BF044848 | UBE2V2    | 0.5323  | 0.0575 | 0.1654  | 0.5362 |
| OLIGO_04263 | BF044850 | PIGK      | -0.3898 | 0.2476 | -0.2283 | 0.4814 |
| OLIGO_05093 | BF044851 | ALKBH6    | 0.2612  | 0.4507 | 0.0488  | 0.8832 |
| OLIGO_04264 | BF044853 | C6orf1    | 0.4148  | 0.127  | 0.1411  | 0.5877 |
| OLIGO_07219 | BF044875 | FBLN5     | 1.851   | 0.0019 | 0.9571  | 0.0932 |
| OLIGO_09295 | BF044876 | G6PC3     | -0.0746 | 0.8633 | 0.137   | 0.7414 |
| OLIGO_00522 | BF044877 | USP19     | 0.1889  | 0.5237 | 0.3192  | 0.2608 |
| OLIGO_04632 | BF044878 | SIPA1     | 0.0061  | 0.99   | 0.0447  | 0.9233 |
| OLIGO_04641 | BF044881 | LOC642104 | 0.1849  | 0.5817 | 0.0271  | 0.9323 |
| OLIGO_04222 | BF044893 | SERPINE1  | -0.3114 | 0.7075 | -0.2292 | 0.7714 |
| OLIGO_09015 | BF044894 | HEATR3    | 0.2859  | 0.3776 | -0.1082 | 0.7285 |
| OLIGO_00833 | BF044900 | MAML1     | -0.219  | 0.4705 | -0.2918 | 0.3161 |
| OLIGO_04218 | BF044906 | KLHL15    | -0.0542 | 0.9079 | 0.1281  | 0.7744 |
| OLIGO_09010 | BF044910 | SIN3B     | 0.3042  | 0.5956 | 0.1185  | 0.8293 |
| OLIGO_10873 | BF044922 | UROC1     | -0.7009 | 0.0867 | -0.1999 | 0.6098 |
| OLIGO_08132 | BF044923 | LOC647535 | -0.1383 | 0.7468 | -0.1101 | 0.7881 |
| OLIGO_08125 | BF044924 | DNAJC4    | 0.046   | 0.8932 | -0.015  | 0.9636 |
| OLIGO_04220 | BF044931 | PLCXD2    | 0.2069  | 0.7164 | -0.4879 | 0.3812 |
| OLIGO_04221 | BF044934 | MTERFD3   | -0.3678 | 0.4578 | -0.1993 | 0.6734 |
| OLIGO_09014 | BF044936 | RTN4IP1   | -0.2744 | 0.4056 | -0.4963 | 0.1544 |
| OLIGO_07414 | BF044937 | ENSA      | -0.1658 | 0.686  | -0.0046 | 0.9907 |
| OLIGO_11491 | BF044939 | TSPYL6    | -0.0391 | 0.92   | 0.2279  | 0.5534 |
| OLIGO_09000 | BF044941 | C2orf30   | -1.878  | 0.0029 | -0.9143 | 0.128  |
| OLIGO_09008 | BF044943 | ZNF407    | 0.3105  | 0.5703 | 0.2776  | 0.5962 |
| OLIGO_04223 | BF044949 | BNIP1     | -0.4597 | 0.5399 | -0.41   | 0.5685 |
| OLIGO_11489 | BF044952 | PPP1R15B  | -0.0667 | 0.8238 | 0.0584  | 0.8392 |
| OLIGO_08115 | BF044958 | FAM98C    | 0.1449  | 0.8202 | -0.0316 | 0.9587 |
| OLIGO_04144 | BF044966 | DDX41     | 0.3377  | 0.4179 | -0.1083 | 0.7864 |
| OLIGO_08765 | BF044967 | AGGF1     | -0.5499 | 0.0417 | -0.2548 | 0.3234 |
| OLIGO_11481 | BF044980 | ACSL1     | 0.9081  | 0.0114 | 0.4725  | 0.1687 |
| OLIGO_11436 | BF044982 | INPP5D    | 0.3276  | 0.4335 | -0.2674 | 0.513  |
| OLIGO_08955 | BF044995 | SH3BGR    | -0.9014 | 0.2241 | -0.7848 | 0.2808 |
| OLIGO_04642 | BF044999 | MGC9850   | 0.5447  | 0.0447 | 0.2886  | 0.2644 |
| OLIGO_08858 | BF045001 | BAIAP2L1  | -0.5716 | 0.3296 | -0.1542 | 0.7774 |
| OLIGO_04640 | BF045004 | KIAA1279  | 0.1125  | 0.6172 | -0.2862 | 0.1845 |
| OLIGO_04639 | BF045005 | NCF4      | 0.4259  | 0.5505 | 0.0753  | 0.9125 |
| OLIGO_03471 | BF045006 | ATG9B     | -0.226  | 0.6744 | -0.277  | 0.5913 |
| OLIGO_04635 | BF045014 | VPS13C    | 0.0013  | 0.9972 | -0.0524 | 0.8847 |
| OLIGO_04637 | BF045022 | INOC1     | -0.1966 | 0.4733 | -0.0288 | 0.9126 |
| OLIGO_11274 | BF045027 | ARS2      | -0.0094 | 0.9645 | 0.0055  | 0.9785 |
| OLIGO_10717 | BF045031 | KLHL22    | -0.7698 | 0.0423 | -0.2618 | 0.4705 |
| OLIGO_10349 | BF045042 | LOC651825 | 0.6     | 0.4369 | 0.8177  | 0.2693 |
| OLIGO_04633 | BF045043 | EXOC8     | -0.562  | 0.2522 | -0.3248 | 0.4898 |
| OLIGO_11265 | BF045045 | MGC2749   | -0.0683 | 0.8079 | -0.1219 | 0.6507 |
| OLIGO_04631 | BF045047 | RBM35A    | -0.4512 | 0.3782 | 0.3027  | 0.5375 |
| OLIGO_04629 | BF045049 | USP39     | 0.0793  | 0.829  | -0.1888 | 0.5917 |

|             |          |              |         |        |         |        |
|-------------|----------|--------------|---------|--------|---------|--------|
| OLIGO_08708 | BF045050 | LPGAT1       | 0.8813  | 0.0205 | 0.3588  | 0.324  |
| OLIGO_09275 | BF045054 | MAPKAPK3     | 0.0015  | 0.9966 | -0.0614 | 0.8572 |
| OLIGO_07721 | BF045055 | SETDB1       | -0.1585 | 0.4127 | 0.0818  | 0.6573 |
| OLIGO_07032 | BF045056 | PTD008       | -0.0762 | 0.7943 | 0.1439  | 0.6069 |
| OLIGO_04634 | BF045060 | OSBP         | 0.8255  | 0.0557 | -0.2958 | 0.4739 |
| OLIGO_04636 | BF045061 | MGC42174     | -0.2729 | 0.5127 | -0.2254 | 0.5728 |
| OLIGO_11756 | BF045063 | Ells1        | 2.0138  | 0      | 1.2251  | 0.002  |
| OLIGO_04647 | BF045064 | LRRC1        | -0.7896 | 0.0649 | -0.3219 | 0.4312 |
| OLIGO_04651 | BF045073 | DKFZp547C195 | -0.5228 | 0.4575 | -0.1129 | 0.8706 |
| OLIGO_08995 | BF045074 | MED8         | -0.4952 | 0.1537 | -0.1946 | 0.5581 |
| OLIGO_09037 | BF045076 | LOC507418    | 0.0805  | 0.835  | 0.271   | 0.4627 |
| OLIGO_07779 | BF045083 | CTDSP1       | -0.1501 | 0.6804 | -0.64   | 0.0669 |
| OLIGO_10900 | BF045084 | TTYH2        | 0.5797  | 0.1828 | 0.1834  | 0.6262 |
| OLIGO_04643 | BF045086 | RNMT         | 0.2263  | 0.4467 | 0.3383  | 0.2325 |
| OLIGO_03251 | BF045103 | ARPP-19      | 0.3334  | 0.2101 | -0.1759 | 0.4877 |
| OLIGO_04644 | BF045106 | LARP2        | 0.2542  | 0.4962 | 0.4059  | 0.2573 |
| OLIGO_04650 | BF045107 | PCGF1        | -0.6235 | 0.6312 | -0.1659 | 0.8969 |
| OLIGO_04649 | BF045108 | PRPS2        | 0.8309  | 0.0139 | 0.3518  | 0.2773 |
| OLIGO_04648 | BF045110 | BMP6         | -0.6055 | 0.235  | -0.1309 | 0.7798 |
| OLIGO_08954 | BF045119 | TTMA         | 0.3705  | 0.4318 | 0.147   | 0.7448 |
| OLIGO_04153 | BF045124 | INPP4B       | -1.6068 | 0.0868 | 0.0517  | 0.9469 |
| OLIGO_08953 | BF045125 | ZCCHC14      | -0.8282 | 0.1399 | -0.179  | 0.7402 |
| OLIGO_04150 | BF045129 | MSL3L1       | 1.4434  | 0.0728 | 0.6253  | 0.3969 |
| OLIGO_04157 | BF045133 | BNIP3L       | -0.0291 | 0.9369 | -0.1107 | 0.7534 |
| OLIGO_04156 | BF045134 | IPO11        | -0.6996 | 0.0051 | -0.3294 | 0.1683 |
| OLIGO_04158 | BF045137 | SLC39A8      | 0.7371  | 0.0701 | 0.498   | 0.2005 |
| OLIGO_04154 | BF045140 | FGFR1OP      | -0.1703 | 0.5332 | -0.1282 | 0.6237 |
| OLIGO_04155 | BF045143 | ANKRD49      | -0.1681 | 0.6362 | 0.0353  | 0.9173 |
| OLIGO_11332 | BF045148 | LOC509040    | -1.6253 | 0.0137 | -1.285  | 0.042  |
| OLIGO_04145 | BF045150 | TBL1XR1      | 0.8135  | 0.0127 | 0.1818  | 0.56   |
| OLIGO_04147 | BF045152 | PDGFC        | -0.5197 | 0.2405 | 0.0321  | 0.9396 |
| OLIGO_11323 | BF045153 | RANBP9       | 0.5515  | 0.1802 | 0.5889  | 0.1359 |
| OLIGO_05071 | BF045161 | NDUFB7       | -0.0124 | 0.9805 | 0.0265  | 0.9565 |
| OLIGO_09196 | BF045165 | C12orf29     | 0.3841  | 0.1977 | 0.2099  | 0.4619 |
| OLIGO_05068 | BF045166 | MDM2         | -0.5859 | 0.3481 | -0.0405 | 0.9444 |
| OLIGO_00040 | BF045167 | POMT1        | 0.2806  | 0.5957 | 0.3413  | 0.5009 |
| OLIGO_05069 | BF045169 | AQR          | -0.3021 | 0.2912 | -0.2249 | 0.4123 |
| OLIGO_09490 | BF045171 | AHCTF1       | 0.1252  | 0.7365 | -0.4396 | 0.2171 |
| OLIGO_05073 | BF045177 | C2           | 0.0861  | 0.8671 | -0.0987 | 0.8421 |
| OLIGO_03099 | BF045182 | BCL10        | 0.615   | 0.0182 | 0.3984  | 0.1085 |
| OLIGO_01428 | BF045189 | NOTCH1       | 0.2886  | 0.4146 | 0.184   | 0.5841 |
| OLIGO_08925 | BF045193 | NDUFS4       | -1.1824 | 0.0349 | -0.508  | 0.3414 |
| OLIGO_05064 | BF045204 | EP300        | -0.1394 | 0.7557 | 0.361   | 0.4    |
| OLIGO_11218 | BF045206 | VTI1A        | 0.2738  | 0.4572 | 0.2505  | 0.4776 |
| OLIGO_10428 | BF045207 | FBXL11       | 1.0296  | 0.0119 | 0.3678  | 0.3471 |
| OLIGO_09160 | BF045217 | CYB5R4       | -0.4618 | 0.3201 | -0.0369 | 0.9342 |
| OLIGO_05063 | BF045230 | SLC35A2      | 0.3392  | 0.257  | 0.1575  | 0.5829 |
| OLIGO_09506 | BF045231 | ZADH1        | -0.0578 | 0.8453 | 0.0284  | 0.9207 |
| OLIGO_10763 | BF045235 | MCM4         | 0.1155  | 0.708  | 0.1809  | 0.5401 |
| OLIGO_07258 | BF045237 | DFFB         | 0.348   | 0.4349 | 0.1656  | 0.6983 |
| OLIGO_11613 | BF045239 | C12orf44     | -0.2342 | 0.5174 | 0.027   | 0.9379 |
| OLIGO_02351 | BF045248 | C1orf52      | 0.0161  | 0.9515 | 0.0718  | 0.7756 |
| OLIGO_04645 | BF045251 | VPS18        | 0.6471  | 0.2067 | 0.4266  | 0.3851 |
| OLIGO_04646 | BF045253 | CHAF1A       | -0.0214 | 0.9543 | -0.1197 | 0.7373 |
| OLIGO_09170 | BF045257 | SUMF2        | -0.5524 | 0.1726 | 0.0766  | 0.8434 |

|             |          |           |         |        |         |        |
|-------------|----------|-----------|---------|--------|---------|--------|
| OLIGO_11522 | BF045258 | BCAP29    | 0.34    | 0.2892 | 0.0062  | 0.9838 |
| OLIGO_04569 | BF045261 | OSTN      | -0.8446 | 0.3049 | 0.4414  | 0.5548 |
| OLIGO_11453 | BF045265 | RFNG      | 0.3508  | 0.3886 | -0.3852 | 0.3229 |
| OLIGO_04563 | BF045269 | ATPAF2    | 0.2464  | 0.4737 | 0.3421  | 0.2997 |
| OLIGO_08831 | BF045271 | SMARCA3   | 0.4235  | 0.4718 | 0.5838  | 0.3297 |
| OLIGO_07705 | BF045275 | CHD4      | 0.5581  | 0.0946 | 0.068   | 0.8316 |
| OLIGO_04163 | BF045278 | TTRAP     | -0.7068 | 0.0695 | -0.1236 | 0.7392 |
| OLIGO_10855 | BF045287 | GRB7      | -0.7011 | 0.3672 | 0.0518  | 0.9432 |
| OLIGO_04169 | BF045292 | HELB      | -0.397  | 0.3138 | -0.2725 | 0.4707 |
| OLIGO_04167 | BF045293 | C8ORFK29  | 0.1836  | 0.5849 | -0.234  | 0.4639 |
| OLIGO_01699 | BF045301 | METAP2    | -0.2607 | 0.5704 | 0.252   | 0.5673 |
| OLIGO_04160 | BF045303 | OSBPL2    | -0.7743 | 0.2444 | -0.3777 | 0.53   |
| OLIGO_10674 | BF045315 | LOC515860 | -1.1245 | 0.0061 | -0.961  | 0.0141 |
| OLIGO_06203 | BF045317 | JMJD2C    | -0.2647 | 0.5151 | -0.2971 | 0.4441 |
| OLIGO_08970 | BF045323 | POP5      | -0.5388 | 0.1101 | -0.2684 | 0.4051 |
| OLIGO_04168 | BF045338 | SNORA14A  | -0.0976 | 0.7542 | -0.1244 | 0.6766 |
| OLIGO_06535 | BF045342 | TPM1      | 1.8593  | 0.024  | 0.2756  | 0.7264 |
| OLIGO_04170 | BF045348 | TAF4      | 0.3946  | 0.275  | 0.27    | 0.4336 |
| OLIGO_04999 | BF045351 | FBXO17    | 0.5655  | 0.5175 | 0.4565  | 0.5955 |
| OLIGO_09320 | BF045354 | M6PR      | 0.5762  | 0.1193 | 0.419   | 0.236  |
| OLIGO_02336 | BF045355 | IPO7      | 1.4299  | 0.0054 | 0.8502  | 0.0869 |
| OLIGO_00209 | BF045356 | GRB2      | 0.5954  | 0.0192 | -0.0795 | 0.7423 |
| OLIGO_05008 | BF045361 | FUK       | 0.3248  | 0.6208 | 0.5406  | 0.4265 |
| OLIGO_05007 | BF045362 | USP31     | 0.4293  | 0.3066 | 0.016   | 0.9681 |
| OLIGO_07187 | BF045365 | TJP2      | 0.3462  | 0.3624 | -0.0611 | 0.8691 |
| OLIGO_11032 | BF045367 | PEX19     | 0.1516  | 0.6548 | -0.2304 | 0.5034 |
| OLIGO_05005 | BF045371 | L3MBTL2   | 0.5081  | 0.0983 | 0.0642  | 0.8278 |
| OLIGO_05002 | BF045373 | RBAK      | 0.0387  | 0.9677 | -0.2713 | 0.7741 |
| OLIGO_03207 | BF045376 | PDLIM1    | -1.2062 | 0.0119 | -0.5161 | 0.2585 |
| OLIGO_10914 | BF045381 | POLI      | -0.0718 | 0.8227 | 0.3142  | 0.3113 |
| OLIGO_10913 | BF045383 | LOC534051 | 0.0252  | 0.9352 | 0.0811  | 0.7893 |
| OLIGO_08912 | BF045387 | RBM15B    | -0.1414 | 0.7365 | 0.0962  | 0.8119 |
| OLIGO_09264 | BF045391 | PRR6      | -0.3337 | 0.3251 | -0.5023 | 0.1227 |
| OLIGO_01239 | BF045394 | UBAP1     | 0.0446  | 0.9018 | 0.1203  | 0.7347 |
| OLIGO_04568 | BF045396 | MOCOS3    | 0.269   | 0.3617 | -0.0745 | 0.7901 |
| OLIGO_09207 | BF045398 | FAAH      | 0.225   | 0.6847 | -0.0367 | 0.9464 |
| OLIGO_07671 | BF045400 | TBC1D14   | 0.2197  | 0.4656 | 0.0168  | 0.9536 |
| OLIGO_09257 | BF045406 | LOC531802 | 0.0446  | 0.8614 | -0.1712 | 0.4824 |
| OLIGO_04570 | BF045408 | CENTB2    | 0.7329  | 0.1303 | 0.4969  | 0.2844 |
| OLIGO_09261 | BF045410 | HYAL1     | -0.1514 | 0.6108 | -0.4258 | 0.136  |
| OLIGO_04571 | BF045411 | C18orf21  | 0.3449  | 0.2509 | 0.1768  | 0.537  |
| OLIGO_09262 | BF045413 | LOH12CR1  | 0.0958  | 0.8819 | -0.0959 | 0.8767 |
| OLIGO_09263 | BF045415 | FAM13A1   | -0.6359 | 0.3427 | -0.2183 | 0.7352 |
| OLIGO_06798 | BF045419 | NME3      | 0.2482  | 0.4528 | 0.0189  | 0.9523 |
| OLIGO_09823 | BF045420 | TBC1D22A  | -0.0262 | 0.9263 | -0.1258 | 0.6422 |
| OLIGO_04562 | BF045424 | MRPL35    | -0.0652 | 0.8337 | 0.2839  | 0.3397 |
| OLIGO_08918 | BF045429 | ALOX5     | -0.1151 | 0.853  | -0.1548 | 0.7985 |
| OLIGO_04564 | BF045437 | PDE1B     | 0.5175  | 0.1414 | 0.15    | 0.6562 |
| OLIGO_04566 | BF045439 | GBAS      | 0.7783  | 0.0576 | 0.8534  | 0.03   |
| OLIGO_04572 | BF045443 | GIPC2     | -1.0495 | 0.0253 | -0.3672 | 0.4132 |
| OLIGO_09258 | BF045444 | CYB5      | -0.8387 | 0.0176 | -0.4632 | 0.1704 |
| OLIGO_04567 | BF045445 | AKAP11    | 0.3896  | 0.1869 | 0.1508  | 0.5938 |
| OLIGO_02565 | BF045454 | SPG7      | -0.2976 | 0.4862 | 0.1543  | 0.7065 |
| OLIGO_11459 | BF045455 | LOC509113 | -0.139  | 0.7279 | -0.068  | 0.8597 |
| OLIGO_09007 | BF045464 | MAST3     | 1.2603  | 0.0068 | 0.2243  | 0.6208 |

|             |          |           |         |        |         |        |
|-------------|----------|-----------|---------|--------|---------|--------|
| OLIGO_06489 | BF045469 | CXXC1     | 0.3447  | 0.5359 | 0.0238  | 0.9645 |
| OLIGO_06544 | BF045470 | ICT1      | -0.4266 | 0.3536 | -0.0382 | 0.9311 |
| OLIGO_06499 | BF045488 | UFM1      | -0.8135 | 0.0848 | 0.1268  | 0.779  |
| OLIGO_10490 | BF045490 | ERBB2     | -0.5022 | 0.2322 | -0.4153 | 0.3096 |
| OLIGO_06491 | BF045491 | ARL4D     | -0.2691 | 0.3654 | -0.1586 | 0.5778 |
| OLIGO_08919 | BF045494 | LAMA3     | 0.9242  | 0.2081 | 0.1107  | 0.8749 |
| OLIGO_05000 | BF045509 | MED28     | 0.2975  | 0.5468 | 0.4762  | 0.3343 |
| OLIGO_09480 | BF045510 | RYR1      | -0.2492 | 0.3111 | 0.0187  | 0.9371 |
| OLIGO_06975 | BF045512 | STX8      | -0.2653 | 0.5717 | -0.2568 | 0.5681 |
| OLIGO_05004 | BF045528 | RPS6KB1   | -0.1447 | 0.7985 | -0.309  | 0.5828 |
| OLIGO_11477 | BF045537 | LOC518023 | 0.0254  | 0.9418 | -0.2151 | 0.5188 |
| OLIGO_09596 | BF045538 | FLJ11184  | 0.0793  | 0.857  | 0.0773  | 0.8531 |
| OLIGO_09479 | BF045539 | BXDC5     | 0.3165  | 0.2998 | 0.6441  | 0.0285 |
| OLIGO_04931 | BF045543 | CAV1      | 2.1046  | 0      | 1.7024  | 0.0002 |
| OLIGO_04945 | BF045546 | LOC510780 | -0.0684 | 0.8447 | 0.3207  | 0.3363 |
| OLIGO_04510 | BF045558 | LOC510961 | 0.105   | 0.878  | -0.0865 | 0.8976 |
| OLIGO_08760 | BF045561 | SNF8      | -0.2284 | 0.7016 | -0.3049 | 0.5936 |
| OLIGO_09052 | BF045562 | AGPAT7    | 0.4219  | 0.2876 | -0.1602 | 0.6734 |
| OLIGO_10637 | BF045567 | ID3       | -0.6141 | 0.3204 | -0.3749 | 0.5268 |
| OLIGO_09228 | BF045573 | LOC134145 | -0.1796 | 0.5425 | 0.2928  | 0.2979 |
| OLIGO_04513 | BF045575 | PHACTR2   | -0.3226 | 0.4532 | -0.5169 | 0.2103 |
| OLIGO_02838 | BF045577 | KATNA1    | 0.4511  | 0.1256 | 0.5668  | 0.0447 |
| OLIGO_07245 | BF045581 | TCEA1     | 0.9385  | 0.0003 | 0.638   | 0.0093 |
| OLIGO_04509 | BF045587 | AATF      | 0.0371  | 0.9236 | 0.491   | 0.1879 |
| OLIGO_05125 | BF045589 | LOC614612 | 2.2825  | 0.0007 | 1.3955  | 0.03   |
| OLIGO_04506 | BF045593 | C14orf142 | 0.0846  | 0.8335 | -0.0153 | 0.9683 |
| OLIGO_11314 | BF045597 | TCEB2     | -0.422  | 0.3692 | -0.3703 | 0.4111 |
| OLIGO_09226 | BF045598 | KIAA0376  | 0.1783  | 0.742  | 0.0968  | 0.8528 |
| OLIGO_04514 | BF045602 | RAB28     | 0.7652  | 0.0115 | -0.1468 | 0.6116 |
| OLIGO_06548 | BF045613 | SC4MOL    | 0.2087  | 0.544  | 0.4688  | 0.2004 |
| OLIGO_04512 | BF045616 | CCDC101   | 0.2808  | 0.7653 | 0.3928  | 0.6858 |
| OLIGO_06507 | BF045632 | KIAA1143  | 0.2697  | 0.3501 | 0.1498  | 0.5881 |
| OLIGO_06508 | BF045634 | AP3S1     | 0.2094  | 0.5202 | -0.1098 | 0.7246 |
| OLIGO_04073 | BF045639 | C5orf5    | -1.7606 | 0.051  | -0.6421 | 0.4571 |
| OLIGO_08081 | BF045642 | WDR55     | 0.2839  | 0.584  | 0.5147  | 0.3219 |
| OLIGO_06444 | BF045645 | CCBP2     | -0.2563 | 0.4595 | -0.3894 | 0.2412 |
| OLIGO_06441 | BF045646 | LOC203547 | 0.5576  | 0.2246 | -0.2958 | 0.4863 |
| OLIGO_06460 | BF045654 | CBX8      | 0.089   | 0.8767 | 0.0496  | 0.9292 |
| OLIGO_06461 | BF045655 | HAP1      | -1.0856 | 0.1667 | -0.4407 | 0.5168 |
| OLIGO_06467 | BF045656 | LOC644538 | -1.7417 | 0.0077 | -0.9122 | 0.1471 |
| OLIGO_06415 | BF045658 | TRAF6     | -0.2243 | 0.5117 | 0.2143  | 0.5126 |
| OLIGO_06428 | BF045659 | TUBGCP2   | -0.0906 | 0.82   | -0.7131 | 0.0623 |
| OLIGO_06429 | BF045661 | CPVL      | -0.6314 | 0.3925 | -0.7535 | 0.2913 |
| OLIGO_04937 | BF045665 | LOC533526 | 0.1393  | 0.7332 | -0.0464 | 0.9051 |
| OLIGO_04418 | BF045666 | ACADS     | 0.2841  | 0.551  | 0.0088  | 0.9846 |
| OLIGO_08739 | BF045667 | CTSL      | 1.7273  | 0.0012 | 0.8904  | 0.0791 |
| OLIGO_07853 | BF045672 | SPCS1     | 0.3293  | 0.2642 | 0.7466  | 0.0085 |
| OLIGO_04936 | BF045674 | LOC614667 | -1.0055 | 0.0395 | -0.5134 | 0.2715 |
| OLIGO_11676 | BF045676 | DCTN3     | 0.5964  | 0.0151 | 0.4394  | 0.0606 |
| OLIGO_04940 | BF045680 | YIPF4     | 0.7971  | 0.0051 | 0.5134  | 0.0584 |
| OLIGO_04941 | BF045681 | SLC25A17  | -0.4623 | 0.2764 | -0.14   | 0.7297 |
| OLIGO_04939 | BF045691 | LTV1      | 0.0725  | 0.8056 | -0.0772 | 0.7834 |
| OLIGO_08281 | BF045696 | DYNC1LI1  | -0.4676 | 0.1625 | -0.1209 | 0.7068 |
| OLIGO_04935 | BF045701 | PKIG      | -0.3665 | 0.3846 | -0.058  | 0.878  |
| OLIGO_04932 | BF045708 | D15Wsu75e | 0.752   | 0.0339 | 0.0852  | 0.8016 |

|             |          |           |         |        |         |        |
|-------------|----------|-----------|---------|--------|---------|--------|
| OLIGO_04933 | BF045710 | AARSD1    | -0.1925 | 0.6192 | -0.0805 | 0.8284 |
| OLIGO_10616 | BF045727 | APCDD1    | -1.4339 | 0.0287 | -0.8178 | 0.1923 |
| OLIGO_08747 | BF045735 | TMPIT     | -0.1666 | 0.6637 | -0.234  | 0.5232 |
| OLIGO_04444 | BF045743 | FLJ20160  | 0.0986  | 0.85   | 0.615   | 0.2065 |
| OLIGO_08972 | BF045749 | ZNHIT4    | 0.1322  | 0.7293 | 0.2468  | 0.5007 |
| OLIGO_09164 | BF045750 | TMEM24    | 1.8521  | 0.02   | 0.9714  | 0.2022 |
| OLIGO_09165 | BF045752 | SGPL1     | -0.6672 | 0.2179 | -0.3541 | 0.495  |
| OLIGO_04442 | BF045754 | IBRDC1    | 0.0361  | 0.9439 | 0.1279  | 0.7946 |
| OLIGO_04443 | BF045755 | GRSF1     | 0.2081  | 0.5085 | 0.306   | 0.3105 |
| OLIGO_04445 | BF045762 | CCNC      | -0.0641 | 0.8262 | 0.095   | 0.7344 |
| OLIGO_09166 | BF045775 | DENND2A   | -0.6246 | 0.1789 | -0.347  | 0.438  |
| OLIGO_10559 | BF045777 | AGPAT1    | -0.5648 | 0.1478 | -0.3493 | 0.3465 |
| OLIGO_09173 | BF045781 | C9orf42   | 0.544   | 0.0062 | 0.3083  | 0.1047 |
| OLIGO_11575 | BF045790 | EIF3S8    | -0.1101 | 0.749  | 0.1571  | 0.6339 |
| OLIGO_08220 | BF045796 | SWAP70    | 0.0815  | 0.9345 | -0.0538 | 0.9557 |
| OLIGO_06427 | BF045797 | PHF1      | 0.5008  | 0.075  | -0.033  | 0.9024 |
| OLIGO_04072 | BF045800 | SEMA4B    | -0.3306 | 0.3376 | 0.2477  | 0.4525 |
| OLIGO_06477 | BF045807 | MOCOS     | 0.4678  | 0.5489 | 0.15    | 0.8428 |
| OLIGO_04849 | BF045808 | PANK2     | 0.1713  | 0.5429 | 0.1265  | 0.6385 |
| OLIGO_06479 | BF045810 | MAN1A2    | -0.1117 | 0.8034 | 0.1037  | 0.8095 |
| OLIGO_06445 | BF045812 | SENP5     | -0.5157 | 0.328  | -0.0401 | 0.9367 |
| OLIGO_11439 | BF045830 | PPP1R13L  | -0.313  | 0.5232 | -0.4528 | 0.3569 |
| OLIGO_09231 | BF045839 | PXK       | 0.1358  | 0.7297 | 0.0561  | 0.8816 |
| OLIGO_09445 | BF045842 | RGS10     | -0.353  | 0.6649 | 0.0579  | 0.9407 |
| OLIGO_04954 | BF045843 | CRB3      | -0.1346 | 0.7692 | -0.2162 | 0.6325 |
| OLIGO_11596 | BF045844 | GNA15     | -0.2054 | 0.5459 | 0.0501  | 0.8778 |
| OLIGO_04953 | BF045850 | LOC506408 | -0.0036 | 0.9956 | 0.2754  | 0.6582 |
| OLIGO_02578 | BF045855 | LSM12     | 0.7127  | 0.0264 | 0.5338  | 0.0841 |
| OLIGO_07717 | BF045856 | SCAND1    | 0.0466  | 0.8754 | -0.0045 | 0.9877 |
| OLIGO_04948 | BF045865 | COL8A1    | -0.3613 | 0.5297 | -0.1991 | 0.7177 |
| OLIGO_04949 | BF045866 | EIF2C3    | -0.3088 | 0.4317 | -0.2351 | 0.5322 |
| OLIGO_08956 | BF045867 | C16orf68  | -2.464  | 0.0002 | -1.5892 | 0.0109 |
| OLIGO_04956 | BF045873 | KIAA0701  | -1.5232 | 0.0239 | -0.8459 | 0.1899 |
| OLIGO_01475 | BF045874 | HEATR1    | 0.4334  | 0.1173 | 0.2144  | 0.416  |
| OLIGO_11779 | BF045877 | VPS4B     | -0.325  | 0.446  | 0.051   | 0.8991 |
| OLIGO_04951 | BF045881 | VASH1     | -0.3516 | 0.4279 | -0.0488 | 0.9087 |
| OLIGO_09297 | BF045882 | INPP4A    | -0.5989 | 0.0736 | -0.3917 | 0.2218 |
| OLIGO_10894 | BF045885 | TRIB3     | 0.1673  | 0.6888 | 0.312   | 0.4358 |
| OLIGO_07763 | BF045890 | SEC23IP   | 0.076   | 0.8233 | 0.3732  | 0.2514 |
| OLIGO_09129 | BF045893 | PLAC8     | 1.575   | 0.0027 | 1.0131  | 0.0428 |
| OLIGO_02609 | BF045898 | GCLM      | 0.6215  | 0.0661 | 0.1113  | 0.7309 |
| OLIGO_01022 | BF045899 | CECR5     | 0.17    | 0.689  | 0.3163  | 0.4374 |
| OLIGO_09178 | BF045903 | NPR1      | -0.0541 | 0.9093 | -0.0496 | 0.913  |
| OLIGO_04447 | BF045905 | NUAK1     | -0.1687 | 0.6733 | -0.0824 | 0.8298 |
| OLIGO_04448 | BF045906 | HLF       | 0.2534  | 0.5788 | 0.2421  | 0.5796 |
| OLIGO_04446 | BF045912 | PLK3      | 0.2046  | 0.724  | 0.1886  | 0.7277 |
| OLIGO_09176 | BF045916 | GABPB2    | -0.2264 | 0.6476 | -0.2998 | 0.5279 |
| OLIGO_04453 | BF045927 | FBXL2     | 0.6866  | 0.1721 | 0.2587  | 0.5896 |
| OLIGO_07672 | BF045929 | EHD1      | -0.2996 | 0.4261 | -0.194  | 0.5909 |
| OLIGO_04457 | BF045932 | MRPS11    | -0.1914 | 0.4157 | -0.0096 | 0.966  |
| OLIGO_07412 | BF045933 | UBL5      | 0.7765  | 0.0252 | 0.488   | 0.1415 |
| OLIGO_09179 | BF045934 | PLAGL2    | 0.1095  | 0.7218 | 0.3106  | 0.297  |
| OLIGO_09136 | BF045936 | CUTL1     | 0.3729  | 0.1104 | 0.3764  | 0.0937 |
| OLIGO_09108 | BF045939 | PXK       | 0.6511  | 0.054  | -0.0589 | 0.8553 |
| OLIGO_04044 | BF045945 | SPIN-2    | -0.6573 | 0.2122 | -0.6477 | 0.202  |



|             |          |              |         |        |         |        |
|-------------|----------|--------------|---------|--------|---------|--------|
| OLIGO_06359 | BF045949 | PROSC        | 0.3714  | 0.597  | 0.5917  | 0.3798 |
| OLIGO_04042 | BF045951 | BCL6         | 0.0637  | 0.8775 | 0.2666  | 0.4958 |
| OLIGO_08817 | BF045955 | MGC15875     | 1.5206  | 0.135  | 1.2463  | 0.1961 |
| OLIGO_04048 | BF045958 | MRM1         | -0.1833 | 0.533  | -0.2536 | 0.3879 |
| OLIGO_10634 | BF045963 | UBE2T        | -0.3986 | 0.3817 | 0.0666  | 0.8788 |
| OLIGO_04045 | BF045969 | TSPAN12      | 0.3006  | 0.5443 | -0.3989 | 0.4155 |
| OLIGO_04046 | BF045970 | CCDC95       | -0.0178 | 0.9725 | -0.1004 | 0.8427 |
| OLIGO_08826 | BF045971 | C1orf9       | -0.162  | 0.6917 | -0.4014 | 0.3057 |
| OLIGO_04047 | BF045975 | C8orf1       | 1.5376  | 0      | 0.9214  | 0.0074 |
| OLIGO_08774 | BF045981 | GNAT1        | 0.2179  | 0.6284 | 0.422   | 0.3275 |
| OLIGO_06361 | BF045982 | EPB41L2      | 0.1361  | 0.7198 | 0.0975  | 0.7908 |
| OLIGO_04052 | BF045987 | ATP6V0D2     | -1.3025 | 0.0565 | -0.6912 | 0.2357 |
| OLIGO_00565 | BF045990 | TMEM16F      | 0.783   | 0.1247 | 0.8082  | 0.0902 |
| OLIGO_00329 | BF045997 | PTP4A1       | 0.7745  | 0.0226 | 0.4095  | 0.2076 |
| OLIGO_08823 | BF045999 | NDUFB11      | 0.8952  | 0.002  | -0.1275 | 0.6438 |
| OLIGO_08821 | BF046000 | HSPB3        | -0.6034 | 0.3618 | -0.6613 | 0.295  |
| OLIGO_08824 | BF046010 | FAM50A       | -0.1365 | 0.7356 | -0.5963 | 0.1281 |
| OLIGO_07962 | BF046014 | PRDX1        | 0.7059  | 0.2266 | 0.6934  | 0.2154 |
| OLIGO_08827 | BF046015 | SDHA         | 0.1134  | 0.702  | 0.3208  | 0.2579 |
| OLIGO_04051 | BF046016 | MANSC1       | 0.1356  | 0.623  | 0.2884  | 0.2759 |
| OLIGO_08818 | BF046020 | FBXO9        | 0.3605  | 0.2854 | 0.3631  | 0.2593 |
| OLIGO_04883 | BF046026 | KIAA1008     | 0.2577  | 0.5373 | 0.8155  | 0.0432 |
| OLIGO_07193 | BF046028 | EIF3S2       | 0.3001  | 0.3914 | -0.3562 | 0.2923 |
| OLIGO_04884 | BF046030 | FLJ34077     | -0.9851 | 0.1064 | -0.1395 | 0.8112 |
| OLIGO_04877 | BF046034 | SHB          | -0.7334 | 0.2829 | -0.3989 | 0.5422 |
| OLIGO_07866 | BF046043 | ARL8B        | 0.595   | 0.023  | 0.3507  | 0.1601 |
| OLIGO_08176 | BF046049 | SMU1         | 0.2219  | 0.4677 | 0.359   | 0.2207 |
| OLIGO_04460 | BF046054 | ATG16L1      | 0.5585  | 0.2707 | 0.1859  | 0.702  |
| OLIGO_08105 | BF046055 | PAPD1        | -0.6297 | 0.0605 | -0.3171 | 0.3241 |
| OLIGO_04461 | BF046056 | LOC441682    | 0.2334  | 0.4646 | 0.1251  | 0.6794 |
| OLIGO_04455 | BF046066 | ZNF350       | -0.9532 | 0.0781 | -0.8692 | 0.0938 |
| OLIGO_04456 | BF046067 | C1QTNF5      | 0.4376  | 0.578  | 0.2634  | 0.7336 |
| OLIGO_09182 | BF046071 | HBXIP        | 0.7312  | 0.0728 | 0.6544  | 0.0986 |
| OLIGO_00087 | BF046074 | CCL15        | -0.47   | 0.5059 | 0.3403  | 0.6035 |
| OLIGO_04458 | BF046084 | RP11-56A21.1 | -0.7689 | 0.2226 | -0.1973 | 0.7089 |
| OLIGO_09180 | BF046094 | MITF         | 0.6207  | 0.3816 | 0.5845  | 0.4016 |
| OLIGO_04450 | BF046097 | MGC11102     | -0.09   | 0.8676 | -0.0676 | 0.8961 |
| OLIGO_04451 | BF046098 | ANKMY2       | 0.1223  | 0.7698 | 0.1968  | 0.6229 |
| OLIGO_09917 | BF046108 | HDAC3        | -0.006  | 0.9913 | -0.102  | 0.847  |
| OLIGO_04459 | BF046111 | TOMM34       | -0.0474 | 0.8853 | 0.3798  | 0.2281 |
| OLIGO_04454 | BF046114 | ALAS1        | 1.3998  | 0      | 0.5414  | 0.0457 |
| OLIGO_11239 | BF046115 | PPP4C        | 0.3567  | 0.2608 | 0.2788  | 0.3545 |
| OLIGO_06372 | BF046118 | PSMD1        | 0.1975  | 0.3974 | 0.1892  | 0.3947 |
| OLIGO_04054 | BF046125 | ARL6IP6      | -0.0558 | 0.871  | -0.0174 | 0.9577 |
| OLIGO_04055 | BF046127 | FOXP1        | 0.8161  | 0.2008 | 0.3171  | 0.5698 |
| OLIGO_06392 | BF046128 | NCOA6IP      | -0.0776 | 0.8093 | 0.2297  | 0.4556 |
| OLIGO_08061 | BF046129 | OPRS1        | -0.1091 | 0.7686 | 0.0949  | 0.7934 |
| OLIGO_06405 | BF046134 | GJA5         | -2.1141 | 0.0005 | -1.2926 | 0.0262 |
| OLIGO_08835 | BF046135 | TRIM71       | -0.3462 | 0.511  | 0.1779  | 0.7262 |
| OLIGO_06406 | BF046136 | SNX16        | 0.1796  | 0.7069 | 0.6322  | 0.168  |
| OLIGO_06398 | BF046141 | PTPLA        | 0.0867  | 0.7656 | 0.0779  | 0.7796 |
| OLIGO_08832 | BF046145 | LOC526200    | 0.7235  | 0.0782 | 0.0475  | 0.9031 |
| OLIGO_04043 | BF046147 | GMPPB        | -0.3418 | 0.578  | -0.0878 | 0.8821 |
| OLIGO_04053 | BF046162 | CPA5         | -1.017  | 0.3993 | -0.5728 | 0.6289 |
| OLIGO_07349 | BF046164 | MFHAS1       | 2.0708  | 0      | 1.5432  | 0.0013 |

|             |          |           |         |        |         |        |
|-------------|----------|-----------|---------|--------|---------|--------|
| OLIGO_10906 | BF046171 | DOCK10    | 1.8271  | 0.0011 | 1.0286  | 0.0544 |
| OLIGO_04878 | BF046176 | DNMT2     | -0.3996 | 0.2834 | -0.1966 | 0.5818 |
| OLIGO_06970 | BF046180 | COX4NB    | -0.5627 | 0.1645 | -0.1425 | 0.7131 |
| OLIGO_04876 | BF046181 | ZNF295    | -0.0413 | 0.8848 | -0.0927 | 0.742  |
| OLIGO_08127 | BF046183 | NGRN      | 0.2685  | 0.4258 | 0.5816  | 0.0724 |
| OLIGO_09415 | BF046185 | SHANK3    | 0.1364  | 0.8135 | -0.1177 | 0.8304 |
| OLIGO_09417 | BF046189 | SSH2      | 0.3648  | 0.3735 | 0.2513  | 0.5218 |
| OLIGO_08018 | BF046190 | PTGDS     | 1.2367  | 0.0213 | 0.719   | 0.16   |
| OLIGO_08235 | BF046191 | LOC508141 | -0.0005 | 0.999  | 0.1164  | 0.7336 |
| OLIGO_04879 | BF046192 | HSD11B2   | -0.0942 | 0.8203 | -0.1677 | 0.6809 |
| OLIGO_07074 | BF046197 | KIAA0913  | 0.5539  | 0.1151 | 0.3022  | 0.3695 |
| OLIGO_02045 | BF046198 | SUCLA2    | -0.4709 | 0.4698 | -0.0397 | 0.9486 |
| OLIGO_09033 | BF046199 | C15orf39  | -0.6523 | 0.125  | -0.345  | 0.3967 |
| OLIGO_07913 | BF046201 | GDF6      | -1.7816 | 0.0771 | -0.7156 | 0.3841 |
| OLIGO_04872 | BF046202 | PLK2      | 1.7322  | 0.0143 | 1.9396  | 0.01   |
| OLIGO_11331 | BF046205 | TXNDC4    | -0.3867 | 0.4441 | -0.2729 | 0.5732 |
| OLIGO_06853 | BF046219 | SNRPD2    | 0.0934  | 0.7662 | 0.1209  | 0.6881 |
| OLIGO_02211 | BF046222 | AKAP8L    | 0.1949  | 0.7966 | 0.1652  | 0.8197 |
| OLIGO_09133 | BF046223 | AHDC1     | 0.1668  | 0.6989 | 0.0141  | 0.9727 |
| OLIGO_07835 | BF046234 | RABEP1    | 0.1277  | 0.7639 | 0.0813  | 0.8419 |
| OLIGO_04383 | BF046258 | C20orf74  | 0.927   | 0.0008 | 0.9697  | 0.0003 |
| OLIGO_04381 | BF046270 | GPR68     | 0.2174  | 0.4414 | -0.094  | 0.7266 |
| OLIGO_09130 | BF046278 | LAMC2     | 1.0771  | 0.0057 | 0.3324  | 0.3692 |
| OLIGO_07369 | BF046279 | MAGED2    | -0.6913 | 0.024  | -0.6551 | 0.0252 |
| OLIGO_04376 | BF046280 | TXNDC12   | 0.1133  | 0.739  | -0.2472 | 0.4468 |
| OLIGO_04382 | BF046282 | TRIM41    | 0.372   | 0.2195 | 0.2077  | 0.4743 |
| OLIGO_04378 | BF046285 | CYLN2     | -0.019  | 0.953  | -0.3669 | 0.2368 |
| OLIGO_02636 | BF046289 | Usp12     | -0.0394 | 0.9013 | 0.1981  | 0.5388 |
| OLIGO_06397 | BF046291 | MESDC2    | -0.343  | 0.4054 | 0.2768  | 0.4837 |
| OLIGO_06383 | BF046293 | C1orf163  | 0.3138  | 0.2279 | 0.5934  | 0.0176 |
| OLIGO_08210 | BF046302 | FBXO31    | -0.4083 | 0.3072 | -0.4268 | 0.2656 |
| OLIGO_09525 | BF046308 | LOC508887 | 0.1959  | 0.6192 | 0.1922  | 0.6174 |
| OLIGO_06300 | BF046312 | ILF3      | 0.0718  | 0.7833 | -0.0162 | 0.9485 |
| OLIGO_04010 | BF046332 | AP1S3     | 0.3407  | 0.3278 | 0.1791  | 0.5752 |
| OLIGO_06311 | BF046336 | MRPS5     | 0.238   | 0.5306 | 0.1965  | 0.5893 |
| OLIGO_04815 | BF046342 | BC050254  | 0.1243  | 0.6262 | -0.2256 | 0.3561 |
| OLIGO_09388 | BF046350 | FAM80A    | -0.4536 | 0.2672 | 0.0067  | 0.9864 |
| OLIGO_02917 | BF046357 | BSDC1     | 0.0189  | 0.9726 | -0.0363 | 0.9458 |
| OLIGO_04819 | BF046359 | IFI30     | -0.5162 | 0.2246 | 0.0283  | 0.9442 |
| OLIGO_04817 | BF046365 | ZFYVE20   | -0.636  | 0.0573 | -0.2046 | 0.5194 |
| OLIGO_04807 | BF046366 | SON       | 0.1284  | 0.5829 | 0.0635  | 0.7768 |
| OLIGO_04806 | BF046367 | LDLRAP1   | 0.056   | 0.8492 | 0.0915  | 0.7445 |
| OLIGO_11028 | BF046369 | LUC7L     | -0.1581 | 0.597  | -0.1947 | 0.4969 |
| OLIGO_04814 | BF046372 | BRP44     | 0.9543  | 0.0063 | 0.593   | 0.0758 |
| OLIGO_04812 | BF046373 | TERF1     | 0.4108  | 0.4545 | 0.2116  | 0.6878 |
| OLIGO_06759 | BF046377 | PCNA      | 0.27    | 0.3894 | -0.0208 | 0.9446 |
| OLIGO_04811 | BF046378 | C10orf9   | 0.3268  | 0.6809 | 0.2809  | 0.7124 |
| OLIGO_04810 | BF046384 | GMEB2     | -0.6618 | 0.1532 | -0.101  | 0.8187 |
| OLIGO_07338 | BF046386 | FAM100B   | 0.6785  | 0.055  | 0.6676  | 0.049  |
| OLIGO_09186 | BF046387 | CYB5D2    | 0.7699  | 0.1069 | 0.0812  | 0.8431 |
| OLIGO_04821 | BF046391 | C9orf90   | -0.2731 | 0.5579 | -0.4436 | 0.3113 |
| OLIGO_04818 | BF046398 | PCTK1     | -0.2837 | 0.3641 | -0.0822 | 0.7837 |
| OLIGO_04813 | BF046401 | CDC40     | 0.2741  | 0.3163 | 0.0155  | 0.9526 |
| OLIGO_04809 | BF046402 | FBXO40    | 1.0099  | 0.0301 | 0.5872  | 0.1613 |
| OLIGO_04808 | BF046404 | PDE4D     | 0.1061  | 0.7861 | 0.1156  | 0.7579 |

|             |          |           |         |        |         |        |
|-------------|----------|-----------|---------|--------|---------|--------|
| OLIGO_11510 | BF046408 | PHF17     | 0.1198  | 0.7991 | 0.0926  | 0.8375 |
| OLIGO_10838 | BF046409 | TRIM39    | -0.7805 | 0.2018 | -0.7763 | 0.1855 |
| OLIGO_04317 | BF046414 | Atp2b1    | 0.4996  | 0.3061 | 0.4656  | 0.3276 |
| OLIGO_04314 | BF046419 | PGM3      | -0.211  | 0.4713 | -0.3065 | 0.2777 |
| OLIGO_09784 | BF046426 | NME1      | 0.1834  | 0.5085 | -0.5099 | 0.0547 |
| OLIGO_09103 | BF046427 | EPHX2     | -0.9423 | 0.2363 | -0.6031 | 0.4324 |
| OLIGO_04320 | BF046429 | LSM6      | 0.4386  | 0.2806 | -0.1812 | 0.6414 |
| OLIGO_04319 | BF046433 | FLRT2     | -0.1538 | 0.6988 | -0.0424 | 0.9111 |
| OLIGO_02130 | BF046437 | MTDH      | 1.0078  | 0.0106 | 0.4803  | 0.2029 |
| OLIGO_04318 | BF046438 | SH3BGRL   | 0.4722  | 0.2587 | 0.0612  | 0.8785 |
| OLIGO_04311 | BF046444 | WHSC1     | -1.1812 | 0.1096 | -1.1324 | 0.1162 |
| OLIGO_09098 | BF046450 | CCDC85B   | -0.1699 | 0.5474 | -0.1487 | 0.5836 |
| OLIGO_04313 | BF046455 | ZNF692    | 0.4561  | 0.3208 | 0.2058  | 0.6403 |
| OLIGO_08900 | BF046459 | TRPV6     | 0.215   | 0.3793 | -0.0213 | 0.9221 |
| OLIGO_04312 | BF046460 | HTATIP    | 1.1244  | 0.0257 | 0.8262  | 0.075  |
| OLIGO_02165 | BF046464 | TEX10     | -0.9163 | 0.0032 | -0.1858 | 0.53   |
| OLIGO_04316 | BF046467 | ZC3H5     | 0.4492  | 0.1152 | -0.3023 | 0.2781 |
| OLIGO_04315 | BF046469 | PHKG2     | 0.1168  | 0.6014 | -0.0402 | 0.8513 |
| OLIGO_09102 | BF046474 | SOCS6     | 0.6141  | 0.2196 | -0.0803 | 0.8695 |
| OLIGO_07312 | BF046475 | MRPL51    | 0.4682  | 0.182  | 0.2919  | 0.3871 |
| OLIGO_04310 | BF046478 | SOCS5     | 0.2879  | 0.2674 | 0.5314  | 0.0329 |
| OLIGO_10606 | BF046501 | RPL37A    | -0.4284 | 0.3141 | 0.0733  | 0.8573 |
| OLIGO_08759 | BF046502 | HEXIM2    | -0.3768 | 0.5081 | -0.0454 | 0.9337 |
| OLIGO_03995 | BF046512 | LOC508512 | -0.7644 | 0.2647 | -0.2008 | 0.7544 |
| OLIGO_07029 | BF046515 | EBP       | 0.0079  | 0.9803 | 0.0099  | 0.974  |
| OLIGO_08025 | BF046519 | UBE1      | -0.0009 | 0.9979 | -0.0168 | 0.961  |
| OLIGO_06139 | BF046524 | PRDM4     | -0.1426 | 0.7862 | -0.5402 | 0.3052 |
| OLIGO_06276 | BF046528 | HOOK1     | -0.5755 | 0.1601 | -0.5081 | 0.1958 |
| OLIGO_11276 | BF046529 | KIAA1191  | 0.659   | 0.1222 | 0.27    | 0.4664 |
| OLIGO_06264 | BF046534 | SH3YL1    | -0.3224 | 0.3775 | -0.1338 | 0.7023 |
| OLIGO_06261 | BF046537 | CUTC      | 0.2004  | 0.3543 | 0.2008  | 0.3314 |
| OLIGO_03005 | BF046541 | RPP14     | -0.5201 | 0.2883 | -0.16   | 0.7319 |
| OLIGO_03994 | BF046549 | VDR       | -0.3624 | 0.5228 | -0.1499 | 0.7847 |
| OLIGO_06246 | BF046550 | BCKDK     | -0.0388 | 0.9344 | -0.3963 | 0.381  |
| OLIGO_01666 | BF046551 | RBM23     | 0.2728  | 0.3735 | 0.2767  | 0.359  |
| OLIGO_06247 | BF046553 | VAR5      | 0.2546  | 0.4292 | -0.0596 | 0.847  |
| OLIGO_11282 | BF046564 | GLE1L     | -0.3532 | 0.4621 | -0.3011 | 0.5209 |
| OLIGO_06282 | BF046565 | JAK3      | 0.8844  | 0.1782 | 0.571   | 0.3644 |
| OLIGO_06283 | BF046567 | ZCRB1     | 0.2109  | 0.6084 | 0.5566  | 0.1572 |
| OLIGO_06284 | BF046571 | DMTF1     | 0.1272  | 0.8267 | 0.2522  | 0.6594 |
| OLIGO_09972 | BF046579 | Gab1      | -0.0166 | 0.9697 | -0.1097 | 0.7929 |
| OLIGO_03993 | BF046580 | VNN1      | -2.5742 | 0      | -0.322  | 0.5761 |
| OLIGO_06228 | BF046591 | FLJ25067  | 0.2382  | 0.4445 | -0.0754 | 0.8002 |
| OLIGO_10417 | BF046592 | SERPING1  | 0.924   | 0.2172 | 0.3358  | 0.6398 |
| OLIGO_08772 | BF046594 | TMEM134   | 0.1512  | 0.8266 | 0.1052  | 0.8737 |
| OLIGO_09104 | BF046597 | HDAC10    | 0.2102  | 0.6723 | 0.1003  | 0.8332 |
| OLIGO_07042 | BF046598 | BRD4      | 0.0188  | 0.9459 | 0.2267  | 0.3936 |
| OLIGO_04253 | BF046601 | C3orf52   | -1.1901 | 0.0092 | -0.192  | 0.6586 |
| OLIGO_03497 | BF046602 | NOLC1     | 0.691   | 0.1067 | 0.5969  | 0.146  |
| OLIGO_04259 | BF046620 | PRSS23    | 0.4292  | 0.145  | 0.3325  | 0.2369 |
| OLIGO_04258 | BF046623 | DCI       | 0.075   | 0.7883 | -0.0299 | 0.912  |
| OLIGO_04249 | BF046626 | HTATSF1   | -0.2077 | 0.5875 | 0.014   | 0.9696 |
| OLIGO_09016 | BF046637 | AMD1      | 0.6154  | 0.0412 | 0.0144  | 0.9602 |
| OLIGO_04747 | BF046644 | SMC1L1    | 0.2982  | 0.4883 | 0.0513  | 0.8989 |
| OLIGO_04752 | BF046650 | LPP       | -0.977  | 0.0351 | -0.0835 | 0.8507 |

|             |          |           |         |        |         |        |
|-------------|----------|-----------|---------|--------|---------|--------|
| OLIGO_09041 | BF046658 | TIMM50    | -0.0792 | 0.7323 | 0.167   | 0.4518 |
| OLIGO_04250 | BF046664 | Usp24     | 0.4362  | 0.1795 | 0.4335  | 0.1642 |
| OLIGO_04252 | BF046665 | MAPK13    | -0.5646 | 0.2385 | -0.527  | 0.2511 |
| OLIGO_07003 | BF046670 | APPBP2    | -0.4215 | 0.2923 | -0.6841 | 0.0749 |
| OLIGO_11567 | BF046672 | NPTN      | 0.2071  | 0.6137 | 0.2087  | 0.5951 |
| OLIGO_04746 | BF046685 | TRPC1     | 0.3559  | 0.3697 | 0.2684  | 0.4804 |
| OLIGO_09355 | BF046691 | LOC617216 | 0.0758  | 0.8555 | 0.1036  | 0.7952 |
| OLIGO_04753 | BF046692 | WASL      | -0.1352 | 0.5585 | -0.0021 | 0.9925 |
| OLIGO_04748 | BF046697 | AP1S1     | 0.6405  | 0.0071 | 0.0583  | 0.7975 |
| OLIGO_04751 | BF046704 | HBQ1      | -1.3017 | 0.0052 | -0.9156 | 0.04   |
| OLIGO_04260 | BF046709 | ARFIP1    | -0.1573 | 0.6928 | 0.0366  | 0.9237 |
| OLIGO_09050 | BF046710 | RRAGD     | 0.3406  | 0.4632 | 0.1816  | 0.6832 |
| OLIGO_04256 | BF046712 | DYRK3     | 0.1566  | 0.6526 | 0.0589  | 0.86   |
| OLIGO_04257 | BF046716 | PFTK1     | 0.1856  | 0.4636 | -0.0883 | 0.716  |
| OLIGO_00626 | BF046725 | LOC493869 | -0.838  | 0.0063 | -0.297  | 0.3086 |
| OLIGO_08698 | BF046735 | C12orf43  | -0.1336 | 0.8404 | -0.1356 | 0.8344 |
| OLIGO_04107 | BF228463 | SETD8     | -0.0301 | 0.9361 | 0.3589  | 0.3185 |
| OLIGO_04149 | BF228464 | LOC539766 | 0.1689  | 0.7702 | -0.1571 | 0.7769 |
| OLIGO_11451 | BF228466 | PCMTD2    | 0.4291  | 0.5562 | 0.8626  | 0.2514 |
| OLIGO_08233 | BF440165 | bubp43    | 0.0485  | 0.9631 | -0.195  | 0.8504 |
| OLIGO_05260 | BF440173 | CR2       | -0.0172 | 0.9889 | -0.7294 | 0.5362 |
| OLIGO_05266 | BF440176 | STXBP3    | 0.8333  | 0.2606 | 0.6427  | 0.3654 |
| OLIGO_05312 | BF440184 | MED28     | 1.0927  | 0.0566 | 0.7718  | 0.1597 |
| OLIGO_10614 | BF440185 | RPL21     | 0.8606  | 0.3377 | 0.3924  | 0.6483 |
| OLIGO_10355 | BF440188 | GABARAP   | 1.0838  | 0.0029 | 0.5744  | 0.0986 |
| OLIGO_06891 | BF440190 | RPL17     | 0.5977  | 0.2108 | 0.1539  | 0.7365 |
| OLIGO_07969 | BF440194 | HNRPF     | 0.7488  | 0.1456 | 0.4412  | 0.3701 |
| OLIGO_08439 | BF440215 | NFKBIA    | 0.1718  | 0.5396 | -0.4499 | 0.0943 |
| OLIGO_08183 | BF440221 | FAM108A1  | -0.5027 | 0.1382 | -0.1718 | 0.5962 |
| OLIGO_06884 | BF440234 | CLK1      | -0.0154 | 0.9548 | 0.2124  | 0.4131 |
| OLIGO_05325 | BF440242 | FMR1      | 0.3776  | 0.4355 | 0.3037  | 0.513  |
| OLIGO_07351 | BF440247 | GOPC      | -0.3959 | 0.3854 | -0.0636 | 0.8805 |
| OLIGO_05278 | BF440255 | IBRDC2    | -0.6089 | 0.1889 | -0.5507 | 0.2151 |
| OLIGO_05298 | BF440264 | ZDHHC2    | 0.5421  | 0.3376 | 0.1517  | 0.7795 |
| OLIGO_05328 | BF440270 | PON2      | -0.3183 | 0.489  | 0.2763  | 0.531  |
| OLIGO_05311 | BF440271 | CHAC2     | -0.1567 | 0.8017 | -0.0462 | 0.9367 |
| OLIGO_05313 | BF440272 | RGS5      | 0.056   | 0.924  | -0.033  | 0.9532 |
| OLIGO_05270 | BF440277 | UBD       | 0.1525  | 0.7868 | -0.0953 | 0.8566 |
| OLIGO_07265 | BF440279 | EIF1B     | -0.0406 | 0.9044 | 0.5518  | 0.1277 |
| OLIGO_05246 | BF440280 | ANXA3     | 1.1408  | 0.0027 | 0.9112  | 0.0124 |
| OLIGO_10759 | BF440281 | SMNDC1    | 0.1029  | 0.8022 | 0.6507  | 0.1615 |
| OLIGO_05279 | BF440284 | RMND5A    | 0.4464  | 0.1677 | 0.1899  | 0.5401 |
| OLIGO_11215 | BF440295 | TMEM87B   | 0.3631  | 0.2656 | 0.4556  | 0.1843 |
| OLIGO_11156 | BF440298 | WDR41     | 0.1623  | 0.8284 | -0.596  | 0.4066 |
| OLIGO_05272 | BF440307 | RAB11FIP2 | 0.1813  | 0.5551 | -0.5612 | 0.0649 |
| OLIGO_05247 | BF440308 | NUCB2     | -0.6973 | 0.1094 | -0.2768 | 0.5057 |
| OLIGO_05293 | BF440316 | NBEAL1    | -0.7276 | 0.4131 | -0.4476 | 0.5921 |
| OLIGO_05296 | BF440317 | LOC530975 | 0.2805  | 0.3167 | -0.1164 | 0.6645 |
| OLIGO_05319 | BF440319 | ZBTB25    | 1.4408  | 0.0485 | 0.8437  | 0.2058 |
| OLIGO_11075 | BF440320 | FANCA     | 0.0668  | 0.9096 | 0.1363  | 0.8084 |
| OLIGO_06543 | BF440323 | CRI1      | -0.364  | 0.3908 | -0.3018 | 0.4609 |
| OLIGO_05310 | BF440325 | TNFRSF1B  | 1.2063  | 0.0009 | 0.5403  | 0.1197 |
| OLIGO_05331 | BF440328 | NME1      | -0.3874 | 0.1788 | -0.0605 | 0.8272 |
| OLIGO_05333 | BF440329 | TMEM129   | 0.1739  | 0.5085 | 0.1056  | 0.6754 |
| OLIGO_05243 | BF440332 | FLJ30092  | 0.5047  | 0.3908 | 0.3808  | 0.5005 |

|             |          |               |         |        |         |        |
|-------------|----------|---------------|---------|--------|---------|--------|
| OLIGO_05273 | BF440333 | RNF14         | 0.2831  | 0.367  | 0.275   | 0.36   |
| OLIGO_05275 | BF440335 | RAB8B         | -0.0005 | 0.9994 | 0.1318  | 0.8135 |
| OLIGO_05283 | BF440340 | MRC1L1        | -1.3297 | 0.3025 | -0.2784 | 0.8025 |
| OLIGO_07224 | BF440341 | IFIT5         | -0.5561 | 0.23   | -0.6037 | 0.1742 |
| OLIGO_05289 | BF440343 | MPHOSPH10     | -0.2269 | 0.6375 | -0.4884 | 0.2884 |
| OLIGO_05267 | BF440345 | SENP8         | -0.1743 | 0.7839 | 0.2978  | 0.6251 |
| OLIGO_05297 | BF440346 | KENAE         | -0.1785 | 0.6022 | 0.1908  | 0.5497 |
| OLIGO_05317 | BF440347 | FGD3          | 0.8036  | 0.0393 | 0.4556  | 0.2218 |
| OLIGO_05301 | BF440349 | LOC652685     | 0.2153  | 0.5036 | 0.0118  | 0.9688 |
| OLIGO_05309 | BF440353 | LOC616789     | -0.0996 | 0.7959 | -0.0775 | 0.8303 |
| OLIGO_05314 | BF440356 | LCP2          | 1.6738  | 0      | 0.9006  | 0.0215 |
| OLIGO_11087 | BF440359 | RPL27A        | 0.6051  | 0.3095 | 0.7218  | 0.2062 |
| OLIGO_08509 | BF440363 | PSMA3         | 0.2043  | 0.5792 | 0.7597  | 0.0319 |
| OLIGO_05284 | BF440367 | MGC134367     | 0.6488  | 0.0748 | 0.3027  | 0.3853 |
| OLIGO_07458 | BF440369 | 40428         | 0.8424  | 0.0611 | 1.3546  | 0.0018 |
| OLIGO_05294 | BF440373 | 0610010K06Rik | 0.915   | 0.0887 | 0.4877  | 0.3434 |
| OLIGO_05323 | BF440375 | PAPD4         | 0.1268  | 0.8048 | 0.111   | 0.8213 |
| OLIGO_05329 | BF440378 | NCF2          | 1.0018  | 0.0752 | 0.464   | 0.389  |
| OLIGO_10612 | BF440381 | FUS           | 0.3072  | 0.536  | 0.2164  | 0.6493 |
| OLIGO_05141 | BF440383 | GNPTAB        | 0.2195  | 0.7269 | 0.5949  | 0.3239 |
| OLIGO_05144 | BF440385 | LOC641971     | 0.3756  | 0.201  | 0.1251  | 0.6553 |
| OLIGO_05303 | BF440386 | Rg9mtd1       | 0.3685  | 0.2776 | 0.103   | 0.7507 |
| OLIGO_05198 | BF440393 | RFFL          | 0.0047  | 0.9901 | 0.2522  | 0.4848 |
| OLIGO_09568 | BF440395 | STK38         | -0.0618 | 0.8734 | 0.1476  | 0.6912 |
| OLIGO_11646 | BF440401 | HLA-DQA1      | 0.0322  | 0.9398 | -0.6825 | 0.0876 |
| OLIGO_05214 | BF440403 | C20orf102     | 0.2374  | 0.6613 | -0.1279 | 0.8055 |
| OLIGO_05191 | BF440407 | CD96          | -0.7738 | 0.4569 | -0.0817 | 0.9337 |
| OLIGO_05199 | BF440411 | FLJ20032      | -0.7629 | 0.0193 | -0.2087 | 0.5009 |
| OLIGO_09615 | BF440412 | LOC652614     | 2.8715  | 0      | 1.8498  | 0.0007 |
| OLIGO_05143 | BF440419 | SFRS12        | 0.5022  | 0.2139 | 0.3086  | 0.4254 |
| OLIGO_05146 | BF440420 | KLF12         | 0.8718  | 0.0234 | 0.3108  | 0.3963 |
| OLIGO_05207 | BF440434 | CMAH          | 1.3031  | 0      | 0.7225  | 0.0095 |
| OLIGO_07375 | BF440439 | RPL4          | 0.6447  | 0.2898 | 0.6756  | 0.2607 |
| OLIGO_05192 | BF440445 | BRD4          | 0.3636  | 0.5494 | 0.1824  | 0.7541 |
| OLIGO_05229 | BF440447 | NUBP1         | -0.0182 | 0.9679 | 0.3134  | 0.4675 |
| OLIGO_05237 | BF440452 | ACTR6         | -0.0857 | 0.7916 | 0.0652  | 0.833  |
| OLIGO_05151 | BF440456 | BRD4          | 0.8008  | 0.1302 | 0.4636  | 0.3604 |
| OLIGO_05215 | BF440460 | LASS5         | -0.2883 | 0.3464 | -0.0104 | 0.9717 |
| OLIGO_05196 | BF440466 | HEG1          | -0.834  | 0.0741 | -0.5201 | 0.2443 |
| OLIGO_05203 | BF440468 | EGR2          | -0.0907 | 0.8654 | -0.2102 | 0.682  |
| OLIGO_10875 | BF440471 | ITPA          | -0.1097 | 0.6928 | 0.3623  | 0.1723 |
| OLIGO_10575 | BF440480 | MAP1LC3B      | 0.4819  | 0.2686 | 0.2442  | 0.5555 |
| OLIGO_05193 | BF440485 | ZNFN1A4       | -0.5866 | 0.4642 | -0.7869 | 0.3227 |
| OLIGO_10202 | BF440490 | PGM1          | 0.5288  | 0.0444 | 0.1017  | 0.6845 |
| OLIGO_05238 | BF440494 | GPR137B       | 1.4314  | 0.0005 | 0.7387  | 0.0579 |
| OLIGO_05154 | BF440501 | FLJ36874      | 0.1023  | 0.7131 | -0.2894 | 0.278  |
| OLIGO_05216 | BF440504 | PVRL1         | -0.1446 | 0.767  | 0.0603  | 0.8992 |
| OLIGO_05220 | BF440505 | LOC507786     | 1.0583  | 0.0751 | 0.5033  | 0.3615 |
| OLIGO_05232 | BF440513 | EXOC5         | -0.1592 | 0.6127 | 0.1484  | 0.6283 |
| OLIGO_05201 | BF440526 | FLJ39739      | 0.2447  | 0.82   | -0.5191 | 0.6207 |
| OLIGO_05269 | BF440536 | BCL11B        | 0.4142  | 0.3922 | 0.2061  | 0.6559 |
| OLIGO_05262 | BF440537 | ATF1          | 0.0102  | 0.9806 | -0.2406 | 0.5485 |
| OLIGO_05307 | BF440550 | LOC518495     | 0.9318  | 0.0376 | 0.4697  | 0.2713 |
| OLIGO_05147 | BF440558 | UGCGL1        | -0.5817 | 0.0359 | -0.4199 | 0.1148 |
| OLIGO_05254 | BF440567 | MHCLA2        | 0.7627  | 0.0474 | 0.8214  | 0.0266 |

|             |          |               |         |        |         |        |
|-------------|----------|---------------|---------|--------|---------|--------|
| OLIGO_05306 | BF440572 | RAB3GAP1      | 0.5708  | 0.3818 | 0.703   | 0.2772 |
| OLIGO_05257 | BF440573 | LOC520186     | 0.2419  | 0.6989 | 0.2666  | 0.6565 |
| OLIGO_05263 | BF440575 | FLJ20125      | 0.5742  | 0.0407 | 0.1626  | 0.5439 |
| OLIGO_05259 | BF440576 | RPL5          | -1.1403 | 0.0388 | -0.3896 | 0.4565 |
| OLIGO_08179 | BF440577 | CREB3L2       | 0.1     | 0.8436 | 0.178   | 0.714  |
| OLIGO_11064 | BF440584 | ZNF265        | -0.761  | 0.0537 | -0.0196 | 0.9584 |
| OLIGO_05268 | BF440586 | RASGRP1       | 2.7369  | 0.0235 | 1.748   | 0.0876 |
| OLIGO_05299 | BF440593 | ENAM          | -0.9149 | 0.0706 | -0.3875 | 0.4237 |
| OLIGO_03594 | BF440603 | DNTTIP2       | 0.1812  | 0.611  | 0.0519  | 0.8789 |
| OLIGO_03595 | BF440613 | LR8           | 0.2048  | 0.6641 | 0.3783  | 0.3896 |
| OLIGO_03597 | BF440618 | SNTB1         | 0.0669  | 0.8047 | -0.2163 | 0.4016 |
| OLIGO_03598 | BF440619 | RB1CC1        | -0.2372 | 0.5645 | -0.3954 | 0.3167 |
| OLIGO_03599 | BF440621 | HFE           | 0.4667  | 0.2678 | 0.3784  | 0.3489 |
| OLIGO_03596 | BF440622 | C5orf25       | 0.2237  | 0.686  | 0.3602  | 0.4974 |
| OLIGO_09928 | BM361817 | PCYT2         | 0.1168  | 0.7725 | -0.0842 | 0.8276 |
| OLIGO_05525 | BM361824 | CARD11        | 0.2691  | 0.4964 | 0.1487  | 0.6951 |
| OLIGO_05522 | BM361838 | RPGR          | 0.9436  | 0.21   | 0.6124  | 0.3849 |
| OLIGO_05523 | BM361845 | TLR4          | -0.2852 | 0.6724 | -0.3462 | 0.5943 |
| OLIGO_09929 | BM361858 | PSD4          | -0.3508 | 0.1965 | -0.1978 | 0.4473 |
| OLIGO_08078 | BM361890 | SUPT6H        | 0.4051  | 0.2878 | 0.2284  | 0.5317 |
| OLIGO_07315 | BM361903 | RARRES2       | -0.349  | 0.1512 | -0.3541 | 0.1305 |
| OLIGO_10708 | BM361926 | SRI           | 0.6077  | 0.0846 | 0.4646  | 0.1678 |
| OLIGO_10464 | BM361928 | SSB           | -0.3393 | 0.4941 | -0.2808 | 0.555  |
| OLIGO_10955 | BM361931 | MMP19         | 0.6115  | 0.1049 | 0.1616  | 0.6545 |
| OLIGO_07706 | BM361939 | KLHL26        | -0.2415 | 0.609  | -0.1483 | 0.7445 |
| OLIGO_09779 | BM361940 | LILRB2        | 2.5579  | 0.0001 | 1.1396  | 0.0557 |
| OLIGO_01035 | BM361946 | NOSIP         | -0.5578 | 0.1224 | -0.2667 | 0.4407 |
| OLIGO_09659 | BM361952 | VARSL         | 0.1167  | 0.8267 | 0.401   | 0.4327 |
| OLIGO_08232 | BM361956 | GNG11         | 2.0533  | 0.0001 | 0.9109  | 0.057  |
| OLIGO_11263 | BM361957 | RPL34         | 0.8841  | 0.0796 | 0.3555  | 0.3962 |
| OLIGO_05531 | BM361983 | CD3EAP        | -0.2466 | 0.52   | -0.0514 | 0.8868 |
| OLIGO_05532 | BM362012 | 9130221J17Rik | 0.4342  | 0.2194 | 0.3771  | 0.2684 |
| OLIGO_05534 | BM362019 | SETX          | 0.6214  | 0.1519 | 0.2173  | 0.6007 |
| OLIGO_10725 | BM362023 | GNAI2         | 0.0969  | 0.8512 | 0.2515  | 0.6216 |
| OLIGO_07270 | BM362027 | GTF2H5        | -0.2476 | 0.4869 | 0.4262  | 0.2143 |
| OLIGO_05536 | BM362040 | RFX5          | 0.3356  | 0.6727 | 0.172   | 0.8214 |
| OLIGO_09935 | BM362041 | AOX1          | 1.1917  | 0.1451 | 0.7221  | 0.3384 |
| OLIGO_09857 | BM362045 | SLAMF7        | -0.7857 | 0.0089 | -0.4328 | 0.1359 |
| OLIGO_05591 | BM362051 | MKKS          | 0.2233  | 0.5379 | 0.2038  | 0.5643 |
| OLIGO_05539 | BM362069 | CREG1         | -0.2662 | 0.6963 | 0.1703  | 0.7981 |
| OLIGO_05540 | BM362074 | TRAF3IP3      | 1.8542  | 0.045  | 1.0476  | 0.2367 |
| OLIGO_11196 | BM362077 | ZNF335        | 0.9424  | 0.1459 | 0.5053  | 0.4158 |
| OLIGO_10756 | BM362088 | DPYSL2        | 0.9916  | 0.0989 | 0.2467  | 0.668  |
| OLIGO_08297 | BM362093 | ABCC5         | -0.807  | 0.1278 | -0.2937 | 0.5667 |
| OLIGO_05542 | BM362113 | XYLT1         | 0.0949  | 0.8869 | 0.4503  | 0.4749 |
| OLIGO_00423 | BM362140 | C17orf63      | -0.8252 | 0.0266 | -0.3315 | 0.3517 |
| OLIGO_06668 | BM362152 | CHCHD1        | -0.8616 | 0.0588 | -0.2406 | 0.5813 |
| OLIGO_05543 | BM362155 | ABHD14A       | 1.1163  | 0.075  | 0.6221  | 0.3002 |
| OLIGO_05545 | BM362186 | ITGA2B        | -0.1108 | 0.8327 | -0.5411 | 0.2824 |
| OLIGO_03026 | BM362192 | ADCK5         | 0.0465  | 0.8766 | 0.3698  | 0.1981 |
| OLIGO_09629 | BM362196 | NDUFA10       | 0.0544  | 0.8966 | -0.1681 | 0.6752 |
| OLIGO_05546 | BM362197 | CYBB          | -0.5719 | 0.4398 | -0.1678 | 0.813  |
| OLIGO_05550 | BM362209 | LOC642083     | -1.2228 | 0.08   | -0.8573 | 0.2134 |
| OLIGO_05552 | BM362212 | STXBP2        | 0.5861  | 0.2049 | 0.8178  | 0.0653 |
| OLIGO_06860 | BM362216 | ATOX1         | -0.2946 | 0.5288 | 0.2969  | 0.5081 |

|             |          |           |         |        |         |        |
|-------------|----------|-----------|---------|--------|---------|--------|
| OLIGO_09901 | BM362224 | CCDC64    | 0.3559  | 0.5946 | -0.1454 | 0.8214 |
| OLIGO_10944 | BM362225 | RPL37     | 0.1358  | 0.7637 | 0.865   | 0.143  |
| OLIGO_09920 | BM362236 | PIK3R1    | 0.3021  | 0.4813 | 0.2352  | 0.5675 |
| OLIGO_06619 | BM362245 | NUDT2     | -0.0261 | 0.9496 | -0.1206 | 0.761  |
| OLIGO_09826 | BM362253 | PLVAP     | -1.0441 | 0.0105 | -0.2493 | 0.5239 |
| OLIGO_03138 | BM362255 | RASA3     | 0.6248  | 0.1971 | 0.361   | 0.4361 |
| OLIGO_11672 | BM362267 | AURKB     | 0.6748  | 0.147  | 0.5792  | 0.1941 |
| OLIGO_09927 | BM362275 | PITPNM2   | 1.8304  | 0.0251 | 1.3983  | 0.0641 |
| OLIGO_07416 | BM362278 | POLB      | 0.5826  | 0.1493 | 0.1102  | 0.7758 |
| OLIGO_05554 | BM362283 | KLHDC5    | 0.7674  | 0.1208 | 0.4147  | 0.3815 |
| OLIGO_05555 | BM362285 | P2RX5     | 0.1486  | 0.7419 | 0.1352  | 0.7547 |
| OLIGO_10923 | BM362293 | PPFIBP2   | -0.0256 | 0.9426 | -0.12   | 0.7256 |
| OLIGO_10958 | BM362301 | SP140     | 2.2019  | 0.0005 | 1.578   | 0.0086 |
| OLIGO_10953 | BM362302 | PSMB10    | 0.8148  | 0.0315 | 0.267   | 0.4603 |
| OLIGO_09744 | BM362306 | HSMPP8    | 0.0105  | 0.9745 | 0.2702  | 0.3902 |
| OLIGO_09679 | BM362315 | HP1BP3    | -0.225  | 0.6852 | 0.3312  | 0.5338 |
| OLIGO_10945 | BM362318 | GLG1      | -0.0649 | 0.8713 | 0.0462  | 0.9044 |
| OLIGO_09939 | BM362320 | C1orf142  | 0.3107  | 0.5365 | 0.1373  | 0.7768 |
| OLIGO_09941 | BM362336 | REXO1     | 0.4989  | 0.3412 | -0.0908 | 0.8563 |
| OLIGO_06889 | BM362349 | NDUFA2    | 0.5102  | 0.0307 | 0.2845  | 0.2085 |
| OLIGO_02867 | BM362352 | PDGFRA    | -0.504  | 0.2986 | -0.0836 | 0.8567 |
| OLIGO_10247 | BM362366 | ZBTB4     | 1.2835  | 0.023  | 1.0781  | 0.0462 |
| OLIGO_09942 | BM362372 | LOC532442 | -0.0975 | 0.774  | -0.2565 | 0.428  |
| OLIGO_05557 | BM362375 | LOC339483 | -0.3418 | 0.287  | -0.0318 | 0.9176 |
| OLIGO_11170 | BM362383 | PDHB      | -0.2515 | 0.4852 | 0.2462  | 0.4751 |
| OLIGO_05559 | BM362397 | DMN       | 2.0417  | 0.0008 | -0.3249 | 0.5856 |
| OLIGO_05560 | BM362403 | CXCR6     | -1.3863 | 0.051  | -0.5421 | 0.4291 |
| OLIGO_09855 | BM362407 | ZCCHC8    | 0.2318  | 0.5587 | 0.6093  | 0.1087 |
| OLIGO_10785 | BM362412 | NICN1     | 0.3225  | 0.3038 | 0.1453  | 0.6287 |
| OLIGO_05558 | BM362422 | MRPS22    | -0.0709 | 0.804  | -0.2294 | 0.4006 |
| OLIGO_07336 | BM362423 | FDPS      | -0.133  | 0.6502 | 0.0299  | 0.9154 |
| OLIGO_09614 | BM362425 | WDR79     | 0.6038  | 0.2476 | 0.1463  | 0.77   |
| OLIGO_10319 | BM362427 | HLA-DRA   | 1.493   | 0.001  | 1.1332  | 0.0087 |
| OLIGO_10560 | BM362433 | EIF1AX    | 0.6677  | 0.1597 | -0.0084 | 0.9852 |
| OLIGO_11667 | BM362434 | TRA@      | -0.2196 | 0.6794 | -0.2794 | 0.5819 |
| OLIGO_05563 | BM362452 | CXCL9     | 0.9876  | 0.1555 | 0.337   | 0.6125 |
| OLIGO_09817 | BM362463 | ATXN7     | -0.5914 | 0.7018 | -0.1017 | 0.947  |
| OLIGO_05565 | BM362465 | UQCR      | 0.4206  | 0.3307 | 0.3027  | 0.4653 |
| OLIGO_11197 | BM362469 | KHDRBS1   | -0.0564 | 0.9002 | -0.1427 | 0.7404 |
| OLIGO_05567 | BM362480 | MDP-1     | 0.2354  | 0.3947 | -0.2136 | 0.4192 |
| OLIGO_09602 | BM362493 | LMOD1     | 0.257   | 0.328  | -0.1631 | 0.5174 |
| OLIGO_05569 | BM362494 | GBF1      | -0.4649 | 0.3213 | -0.0265 | 0.953  |
| OLIGO_05571 | BM362502 | CEECAM1   | 0.7606  | 0.3176 | 0.869   | 0.2338 |
| OLIGO_07820 | BM362510 | POP7      | -0.2338 | 0.4076 | -0.2859 | 0.291  |
| OLIGO_11195 | BM362528 | NIT1      | -0.3789 | 0.1273 | -0.0222 | 0.9257 |
| OLIGO_07018 | BM362530 | RPL30     | 0.9515  | 0.0439 | 0.6349  | 0.1603 |
| OLIGO_10962 | BM362536 | CD72      | 0.5106  | 0.3537 | -0.1009 | 0.8483 |
| OLIGO_05576 | BM362570 | ZNF622    | 0.5928  | 0.0336 | -0.0467 | 0.8609 |
| OLIGO_05577 | BM362578 | DGCR6L    | 0.3241  | 0.4428 | -0.158  | 0.6963 |
| OLIGO_09925 | BM362579 | ERP29     | -1.0629 | 0.0098 | -0.3697 | 0.3474 |
| OLIGO_00161 | BM362588 | USMG5     | -0.2279 | 0.5394 | 0.1104  | 0.7565 |
| OLIGO_09771 | BM362602 | PPP1R7    | 0.7084  | 0.1227 | 0.0025  | 0.9954 |
| OLIGO_05578 | BM362608 | LOC90826  | 0.0776  | 0.8604 | -0.4756 | 0.2686 |
| OLIGO_11668 | BM362620 | KIF4A     | -0.8161 | 0.105  | -0.8936 | 0.0743 |
| OLIGO_10347 | BM362645 | LOC515773 | -0.2189 | 0.5614 | 0.5386  | 0.1352 |

|             |          |               |         |        |         |        |
|-------------|----------|---------------|---------|--------|---------|--------|
| OLIGO_07285 | BM362648 | RPL5          | 0.4504  | 0.5526 | 0.744   | 0.3064 |
| OLIGO_09619 | BM362663 | OBFC1         | -0.297  | 0.4459 | -0.1397 | 0.7066 |
| OLIGO_05580 | BM362665 | ENPP2         | 1.0893  | 0.1094 | 0.3805  | 0.5309 |
| OLIGO_09708 | BM362667 | TMEM16F       | 0.5472  | 0.1533 | 0.4994  | 0.1719 |
| OLIGO_09590 | BM362685 | TAP1          | 0.3851  | 0.3802 | 0.2089  | 0.6196 |
| OLIGO_09673 | BM362702 | ZDHHC16       | 0.0996  | 0.7229 | -0.0653 | 0.8092 |
| OLIGO_05582 | BM362713 | FLJ90013      | -0.5574 | 0.2296 | -0.0751 | 0.8658 |
| OLIGO_11054 | BM362726 | GSTO1         | -0.6084 | 0.1425 | 0.3298  | 0.4066 |
| OLIGO_09894 | BM362731 | ABI3          | 0.4898  | 0.2005 | 0.1355  | 0.678  |
| OLIGO_05584 | BM362733 | PTPRE         | 0.036   | 0.945  | 0.3978  | 0.4266 |
| OLIGO_05585 | BM362739 | MOBP          | 0.2062  | 0.7778 | 0.2028  | 0.7768 |
| OLIGO_05586 | BM362743 | SAA1          | -0.3282 | 0.5405 | -0.3155 | 0.5393 |
| OLIGO_07893 | BM362751 | TRAF5         | -0.6934 | 0.1722 | -0.1703 | 0.7186 |
| OLIGO_00767 | BM362752 | C2orf18       | 0.6933  | 0.0574 | 0.6246  | 0.0741 |
| OLIGO_05587 | BM362765 | MLL5          | 0.3213  | 0.4014 | 0.3801  | 0.3002 |
| OLIGO_07373 | BM362775 | ECRG4         | -0.5911 | 0.3564 | -0.252  | 0.673  |
| OLIGO_09934 | BM362796 | LOC642083     | 0.1475  | 0.7045 | -0.0391 | 0.9176 |
| OLIGO_09739 | BM362799 | PACAP         | 0.3925  | 0.363  | 0.3963  | 0.3381 |
| OLIGO_05588 | BM362809 | CP            | 0.0471  | 0.9255 | -0.0448 | 0.9262 |
| OLIGO_05589 | BM362811 | ProSAPiP1     | 1.014   | 0.0018 | 0.444   | 0.1532 |
| OLIGO_05593 | BM362838 | SMAP1L        | 0.7459  | 0.0203 | 0.3008  | 0.3291 |
| OLIGO_09757 | BM362846 | C9orf138      | -0.0099 | 0.9887 | 0.0594  | 0.9312 |
| OLIGO_09867 | BM362857 | PIM2          | 0.216   | 0.4456 | 0.1366  | 0.6143 |
| OLIGO_06830 | BM362859 | PTGIS         | -1.3021 | 0.0048 | -0.8151 | 0.0651 |
| OLIGO_05597 | BM362861 | TMEM55B       | 0.3984  | 0.0974 | -0.0065 | 0.9776 |
| OLIGO_07451 | BM362899 | KIAA0690      | -0.4722 | 0.2296 | 0.077   | 0.8289 |
| OLIGO_05601 | BM362911 | C10orf54      | 0.2766  | 0.2276 | -0.1435 | 0.5158 |
| OLIGO_09567 | BM362929 | PRSS2         | 0.2868  | 0.6009 | 0.0758  | 0.8858 |
| OLIGO_05603 | BM362963 | C1orf37       | 0.2752  | 0.5632 | 0.1014  | 0.8242 |
| OLIGO_07291 | BM362984 | GPAA1         | 1.2296  | 0.0565 | 0.1561  | 0.8002 |
| OLIGO_09898 | BM363012 | NPTN          | -0.3574 | 0.401  | 0.0665  | 0.8705 |
| OLIGO_05606 | BM363013 | SRBD1         | -0.2937 | 0.4934 | -0.1931 | 0.6335 |
| OLIGO_09951 | BM363023 | LOC507407     | 0.0695  | 0.8699 | -0.0632 | 0.8765 |
| OLIGO_02149 | BM363031 | NCALD         | 0.7501  | 0.0862 | 0.5725  | 0.1718 |
| OLIGO_09621 | BM363046 | DGKZ          | 0.4692  | 0.1937 | 0.4937  | 0.1539 |
| OLIGO_10660 | BM363051 | FABP3         | -0.2678 | 0.4711 | -0.1749 | 0.6247 |
| OLIGO_10350 | BM363057 | SPR           | -0.5099 | 0.3812 | -0.5676 | 0.3189 |
| OLIGO_11674 | BM363086 | C1orf2        | 0.0712  | 0.7732 | 0.0308  | 0.8964 |
| OLIGO_07833 | BM363181 | SAPS3         | 0.0162  | 0.9555 | -0.2176 | 0.438  |
| OLIGO_09544 | BM363182 | PRODH         | -0.8472 | 0.0254 | -0.4777 | 0.1877 |
| OLIGO_08112 | BM363845 | MTX1          | -0.0961 | 0.735  | -0.4676 | 0.0855 |
| OLIGO_09692 | BM363854 | DKFZp761P0423 | -1.321  | 0.0703 | -0.7962 | 0.2434 |
| OLIGO_08269 | BM363855 | PLA2G2D       | 0.4923  | 0.3805 | 0.5021  | 0.3508 |
| OLIGO_00774 | BM363869 | KIAA1754L     | 0.3343  | 0.4358 | 0.6933  | 0.1515 |
| OLIGO_09916 | BM363874 | SURF2         | 0.0652  | 0.873  | 0.1668  | 0.6713 |
| OLIGO_10556 | BM363883 | BEX2          | 0.2719  | 0.7265 | 0.1951  | 0.7926 |
| OLIGO_09523 | BM363885 | SPIRE2        | 0.3743  | 0.45   | 0.3347  | 0.4811 |
| OLIGO_05500 | BM363888 | RASSF1        | 0.6725  | 0.1614 | 0.2739  | 0.5516 |
| OLIGO_10203 | BM363900 | RGL2          | 0.151   | 0.6535 | 0.1991  | 0.5361 |
| OLIGO_05501 | BM363902 | ZAP70         | -0.0957 | 0.8039 | 0.0747  | 0.8395 |
| OLIGO_09918 | BM363905 | GCSH          | -0.6593 | 0.2776 | -0.4289 | 0.4612 |
| OLIGO_10630 | BM363908 | C12orf57      | 0.2514  | 0.4965 | 0.2386  | 0.499  |
| OLIGO_10659 | BM363918 | RASSF1        | -0.1113 | 0.7577 | -0.4935 | 0.1494 |
| OLIGO_09911 | BM363924 | SORBS2        | 0.8209  | 0.0619 | 0.5522  | 0.1896 |
| OLIGO_05504 | BM363938 | HRB2          | -0.0695 | 0.895  | -0.0681 | 0.8952 |



|             |          |           |         |        |         |        |
|-------------|----------|-----------|---------|--------|---------|--------|
| OLIGO_07326 | BM363942 | VAMP2     | -0.1577 | 0.5365 | -0.339  | 0.1663 |
| OLIGO_09921 | BM363955 | PDZK1IP1  | -0.3167 | 0.4883 | -0.189  | 0.6643 |
| OLIGO_06538 | BM363963 | XDH       | 1.8858  | 0.0001 | 1.0539  | 0.0228 |
| OLIGO_05506 | BM363966 | VPS39     | 0.0087  | 0.986  | -0.001  | 0.9983 |
| OLIGO_05507 | BM363968 | CCL3L1    | 0.6347  | 0.0231 | 0.1048  | 0.6936 |
| OLIGO_10959 | BM363976 | CORO1A    | 1.1907  | 0.0522 | 0.7947  | 0.1762 |
| OLIGO_05508 | BM363977 | TBC1D9    | 0.4363  | 0.3946 | 0.2479  | 0.607  |
| OLIGO_11048 | BM363983 | ATP1A1    | 0.9175  | 0.0627 | 0.8976  | 0.0576 |
| OLIGO_09848 | BM363992 | ADD1      | 0.6553  | 0.1635 | 0.6046  | 0.1873 |
| OLIGO_11340 | BM364002 | ITM2C     | 0.7581  | 0.0724 | -0.4252 | 0.3023 |
| OLIGO_05511 | BM364010 | ASPSCR1   | 0.63    | 0.3138 | 0.2346  | 0.6955 |
| OLIGO_05512 | BM364011 | TM7SF3    | 0.2213  | 0.5598 | 0.0996  | 0.7834 |
| OLIGO_10692 | BM364015 | MYH11     | -0.5307 | 0.2942 | 0.2246  | 0.6445 |
| OLIGO_05515 | BM364034 | LOC525040 | 0.3557  | 0.5252 | 0.2921  | 0.59   |
| OLIGO_05516 | BM364040 | CCDC65    | -1.188  | 0.0813 | -0.828  | 0.2047 |
| OLIGO_10339 | BM364041 | MT        | 0.7209  | 0.0456 | 0.5828  | 0.0949 |
| OLIGO_09924 | BM364049 | DYNLRB1   | 0.3741  | 0.2651 | 0.3979  | 0.2165 |
| OLIGO_05518 | BM364056 | CD99L2    | 0.4007  | 0.5088 | 0.402   | 0.4894 |
| OLIGO_05367 | BM364411 | DMAP1     | -0.1864 | 0.6125 | -0.1886 | 0.5897 |
| OLIGO_09623 | BM364414 | FHL3      | -0.5249 | 0.0817 | -0.367  | 0.204  |
| OLIGO_09625 | BM364421 | GALE      | -0.7639 | 0.0084 | -0.3942 | 0.1545 |
| OLIGO_09634 | BM364434 | SIT1      | 0.1303  | 0.6749 | -0.1289 | 0.664  |
| OLIGO_09606 | BM364439 | PDZD11    | 0.0725  | 0.7731 | 0.0783  | 0.7442 |
| OLIGO_09628 | BM364454 | DTNB      | 0.9599  | 0.1998 | 0.446   | 0.5341 |
| OLIGO_01901 | BM364481 | ARFRP1    | 0.3503  | 0.615  | 0.313   | 0.6393 |
| OLIGO_05370 | BM364482 | NNT       | 0.9709  | 0.0451 | 0.8077  | 0.0799 |
| OLIGO_07060 | BM364483 | USP3      | 0.0033  | 0.9916 | 0.2671  | 0.3678 |
| OLIGO_09644 | BM364484 | TNIP1     | -0.538  | 0.2977 | -0.2708 | 0.5844 |
| OLIGO_09646 | BM364493 | MAGED4    | -0.5847 | 0.3978 | 0.4293  | 0.5173 |
| OLIGO_07337 | BM364502 | NDUFS5    | -0.5996 | 0.0961 | 0.2783  | 0.42   |
| OLIGO_09649 | BM364506 | ITGB7     | -0.2095 | 0.6223 | -0.0569 | 0.8885 |
| OLIGO_09651 | BM364508 | PARVG     | 1.8353  | 0      | 0.943   | 0.0191 |
| OLIGO_09654 | BM364511 | FCHSD1    | 0.0175  | 0.9461 | -0.5846 | 0.0196 |
| OLIGO_05374 | BM364537 | CEACAM4   | 0.21    | 0.5378 | -0.2112 | 0.5169 |
| OLIGO_09662 | BM364545 | JMJD2A    | 0.4255  | 0.2797 | 0.4234  | 0.274  |
| OLIGO_09650 | BM364547 | INPP5B    | 0.8823  | 0.0111 | 0.536   | 0.1059 |
| OLIGO_10514 | BM364550 | S100A12   | -0.7397 | 0.5488 | 2.0544  | 0.0744 |
| OLIGO_09653 | BM364553 | RAMP1     | 0.4269  | 0.4252 | 0.1322  | 0.7828 |
| OLIGO_09665 | BM364563 | CD82      | -0.1409 | 0.6583 | -0.212  | 0.4877 |
| OLIGO_05375 | BM364565 | C12orf35  | -0.4656 | 0.4339 | -0.4058 | 0.4767 |
| OLIGO_10946 | BM364569 | SPBC24    | -0.187  | 0.5958 | 0.0264  | 0.939  |
| OLIGO_05376 | BM364578 | CCL21     | -0.2216 | 0.5414 | -0.2172 | 0.5323 |
| OLIGO_09670 | BM364584 | LONPL     | -0.034  | 0.9601 | 0.6067  | 0.3494 |
| OLIGO_05377 | BM364598 | FAM18B2   | 0.3322  | 0.1824 | 0.1403  | 0.5542 |
| OLIGO_05378 | BM364614 | KAZALD1   | -0.2374 | 0.5593 | 0.0523  | 0.8932 |
| OLIGO_05379 | BM364617 | GTPBP1    | 0.5399  | 0.2552 | -0.3192 | 0.4827 |
| OLIGO_07737 | BM364639 | KIAA0586  | -0.3193 | 0.3005 | -0.0183 | 0.9506 |
| OLIGO_07576 | BM364649 | MRPL30    | 0.1937  | 0.5148 | -0.1103 | 0.6986 |
| OLIGO_09681 | BM364653 | ADRA2B    | 0.0994  | 0.8047 | -0.108  | 0.7839 |
| OLIGO_09683 | BM364656 | PHF15     | 1.0442  | 0.0265 | 0.2272  | 0.6133 |
| OLIGO_07609 | BM364661 | HSPB8     | 1.2279  | 0.0012 | 0.7562  | 0.0366 |
| OLIGO_09687 | BM364671 | MGC140438 | 0.6444  | 0.1425 | 0.1062  | 0.7996 |
| OLIGO_09675 | BM364692 | ANKRD13D  | 0.2754  | 0.7205 | 0.1879  | 0.803  |
| OLIGO_09695 | BM364709 | PPP1R3D   | -0.2128 | 0.8179 | -0.3842 | 0.6738 |
| OLIGO_09639 | BM364723 | RAI16     | 0.3415  | 0.3348 | 0.2326  | 0.4931 |

|             |          |           |         |        |         |        |
|-------------|----------|-----------|---------|--------|---------|--------|
| OLIGO_09671 | BM364733 | MICAL1    | 1.2066  | 0.0048 | 1.1746  | 0.0044 |
| OLIGO_10664 | BM364736 | WTIP      | 0.1396  | 0.8033 | 0.2359  | 0.6695 |
| OLIGO_02310 | BM364753 | NR4A2     | 0.6762  | 0.1486 | -0.0251 | 0.9554 |
| OLIGO_09699 | BM364755 | C21orf2   | 2.4256  | 0.0009 | 1.3501  | 0.0537 |
| OLIGO_05386 | BM364762 | DNAJB2    | 0.8971  | 0.1056 | -0.3426 | 0.5187 |
| OLIGO_09703 | BM364767 | EYA3      | -0.6486 | 0.2631 | -0.2088 | 0.6743 |
| OLIGO_05387 | BM364769 | TUBD1     | 0.2334  | 0.7639 | -0.5597 | 0.4675 |
| OLIGO_09704 | BM364776 | RPL5      | -0.3936 | 0.4583 | -0.7598 | 0.1358 |
| OLIGO_09718 | BM364784 | NCKAP1L   | -0.1616 | 0.5634 | -0.5331 | 0.0473 |
| OLIGO_09719 | BM364786 | EPSTI1    | 0.6271  | 0.078  | 0.3298  | 0.3331 |
| OLIGO_10338 | BM364820 | PPIG      | -0.6219 | 0.3266 | -0.9821 | 0.1065 |
| OLIGO_05388 | BM364822 | LOC645568 | -0.1269 | 0.7841 | -0.2567 | 0.5816 |
| OLIGO_05390 | BM364825 | KIRREL3   | 0.1037  | 0.8459 | 0.0143  | 0.9777 |
| OLIGO_09714 | BM364829 | ZNF385    | -0.1164 | 0.9196 | 0.0381  | 0.9733 |
| OLIGO_10663 | BM364839 | C1orf151  | 0.0057  | 0.9829 | 0.3962  | 0.1226 |
| OLIGO_09677 | BM364841 | IL10RA    | -0.3897 | 0.344  | -0.0934 | 0.8092 |
| OLIGO_01426 | BM364843 | TPX2      | 0.7902  | 0.0496 | 0.9422  | 0.0147 |
| OLIGO_09720 | BM364844 | ZNF174    | 0.3679  | 0.5566 | 0.1205  | 0.8408 |
| OLIGO_09709 | BM364846 | LOC388789 | 0.0638  | 0.8392 | 0.2901  | 0.3365 |
| OLIGO_09617 | BM364855 | PSMB8     | 0.9303  | 0.0181 | 0.2211  | 0.5584 |
| OLIGO_05389 | BM364858 | ZNF12     | -0.1783 | 0.8804 | -0.083  | 0.9434 |
| OLIGO_09678 | BM364859 | RNF113A   | 0.072   | 0.8716 | 0.2397  | 0.5874 |
| OLIGO_05391 | BM364871 | FGL2      | -0.4563 | 0.5799 | -0.4641 | 0.5472 |
| OLIGO_08119 | BM364879 | LSM4      | 0.2644  | 0.4156 | 0.0872  | 0.7777 |
| OLIGO_09716 | BM364880 | ARL13B    | -1.1189 | 0.0094 | -0.5127 | 0.2105 |
| OLIGO_09613 | BM364882 | PROCA1    | -0.4039 | 0.412  | -0.3108 | 0.5102 |
| OLIGO_09721 | BM364886 | MYO9A     | -1.0298 | 0.1532 | -0.6524 | 0.345  |
| OLIGO_05395 | BM364902 | C13orf10  | 0.0304  | 0.9245 | 0.0371  | 0.9036 |
| OLIGO_05397 | BM364905 | ITGB5     | 0.1705  | 0.7642 | -0.2795 | 0.6164 |
| OLIGO_08213 | BM364907 | BAT4      | 0.3675  | 0.2711 | 0.4641  | 0.1474 |
| OLIGO_05398 | BM364912 | CLEC2D    | 1.2847  | 0.0205 | 0.6075  | 0.2522 |
| OLIGO_09870 | BM364921 | HMOX1     | -0.0411 | 0.925  | 0.3077  | 0.4614 |
| OLIGO_09729 | BM364946 | ADAM8     | 0.081   | 0.7723 | -0.0122 | 0.9638 |
| OLIGO_05400 | BM364950 | ETV6      | 0.139   | 0.6052 | 0.1492  | 0.5627 |
| OLIGO_05402 | BM364954 | CCL4L1    | -0.1538 | 0.6481 | 0.0727  | 0.822  |
| OLIGO_05405 | BM364981 | PFDN5     | 0.5132  | 0.3526 | 0.3233  | 0.5412 |
| OLIGO_09738 | BM364993 | SMYD3     | -0.5174 | 0.3803 | -0.9136 | 0.102  |
| OLIGO_05406 | BM364995 | MGC128856 | -0.3275 | 0.542  | 0.0303  | 0.9513 |
| OLIGO_07555 | BM365007 | IHPK1     | 0.729   | 0.0061 | 0.7111  | 0.0051 |
| OLIGO_05408 | BM365025 | SAMHD1    | -0.6122 | 0.3575 | -0.4617 | 0.467  |
| OLIGO_07661 | BM365030 | FRG1      | -0.0557 | 0.8582 | 0.4436  | 0.1381 |
| OLIGO_05407 | BM365043 | LOC652614 | 0.3322  | 0.597  | 0.2326  | 0.6993 |
| OLIGO_05409 | BM365054 | BAZ2B     | -1.1014 | 0.0526 | -1.1446 | 0.0348 |
| OLIGO_09746 | BM365057 | CFP       | 0.1528  | 0.7995 | 0.1589  | 0.783  |
| OLIGO_09749 | BM365075 | GEM       | 0.2586  | 0.612  | 0.1033  | 0.8324 |
| OLIGO_05410 | BM365100 | PITPNM1   | 0.6816  | 0.2814 | 0.0541  | 0.9289 |
| OLIGO_09755 | BM365121 | C14orf104 | -0.2117 | 0.6074 | -0.0749 | 0.8496 |
| OLIGO_07488 | BM365128 | H2AFY     | 0.8335  | 0.1014 | 0.6752  | 0.1638 |
| OLIGO_10943 | BM365148 | RPL35     | 1.3542  | 0.1315 | 0.9483  | 0.2703 |
| OLIGO_05414 | BM365149 | FAM76B    | 0.0713  | 0.8742 | 0.1737  | 0.6872 |
| OLIGO_10486 | BM365159 | RPL22     | -0.0553 | 0.854  | -0.1139 | 0.6921 |
| OLIGO_09759 | BM365166 | ZP3       | -0.2239 | 0.7972 | -0.4863 | 0.5719 |
| OLIGO_09763 | BM365183 | CD3E      | -0.09   | 0.9362 | 0.8762  | 0.4498 |
| OLIGO_09764 | BM365187 | UBE2J2    | 0.1054  | 0.8594 | -0.1812 | 0.7509 |
| OLIGO_01258 | BM365199 | SMARCA2   | 1.5192  | 0      | 0.287   | 0.3474 |

|             |          |              |         |        |         |        |
|-------------|----------|--------------|---------|--------|---------|--------|
| OLIGO_05417 | BM365200 | WDFY2        | -0.7121 | 0.2623 | 0.2246  | 0.6911 |
| OLIGO_05418 | BM365203 | RPS6KA1      | 0.8576  | 0.0294 | 0.4969  | 0.1872 |
| OLIGO_07190 | BM365231 | GYPC         | -0.0614 | 0.8545 | -0.1471 | 0.6459 |
| OLIGO_09772 | BM365235 | FBXW4        | 0.2343  | 0.4202 | -0.0126 | 0.9645 |
| OLIGO_13215 | BM365241 | HLA-DMA      | 0.5843  | 0.0935 | 0.3866  | 0.2467 |
| OLIGO_07543 | BM365265 | C1R          | -0.3792 | 0.3133 | -0.0394 | 0.913  |
| OLIGO_05420 | BM365273 | RNF31        | 0.3984  | 0.2142 | 0.186   | 0.5449 |
| OLIGO_05422 | BM365292 | HIST1H2AG    | -0.9796 | 0.0565 | 0.1306  | 0.7913 |
| OLIGO_05423 | BM365296 | PDE5A        | -0.3712 | 0.3095 | 0.0878  | 0.802  |
| OLIGO_11198 | BM365335 | RNF123       | -0.418  | 0.1304 | -0.3208 | 0.2244 |
| OLIGO_05424 | BM365348 | CD2          | -1.1389 | 0.0534 | -0.7794 | 0.1661 |
| OLIGO_09783 | BM365363 | ETFB         | 0.433   | 0.3976 | 0.0981  | 0.8414 |
| OLIGO_05427 | BM365371 | C10orf54     | 0.3442  | 0.3004 | 0.0339  | 0.915  |
| OLIGO_08212 | BM365375 | CTF8         | -0.8024 | 0.1941 | -0.3839 | 0.5166 |
| OLIGO_05431 | BM365409 | MYO1G        | 0.7776  | 0.0783 | 0.4406  | 0.2953 |
| OLIGO_11231 | BM365429 | CSDE1        | -0.2632 | 0.515  | 0.4209  | 0.3082 |
| OLIGO_10609 | BM365446 | SF3B14       | -0.1271 | 0.6569 | 0.2677  | 0.3289 |
| OLIGO_07370 | BM365495 | M6PRBP1      | 1.6394  | 0.0525 | 0.7694  | 0.302  |
| OLIGO_10947 | BM365546 | CD5L         | -0.3426 | 0.5835 | 0.0076  | 0.9897 |
| OLIGO_06773 | BM365552 | DKFZp762I137 | -0.3835 | 0.5569 | 0.0641  | 0.9181 |
| OLIGO_07321 | BM365566 | C20orf29     | 0.1089  | 0.8499 | 0.5572  | 0.3128 |
| OLIGO_05433 | BM365570 | LYL1         | -0.1716 | 0.6548 | -0.1335 | 0.7167 |
| OLIGO_09952 | BM365594 | MS4A7        | 0.2067  | 0.4631 | -0.0121 | 0.9643 |
| OLIGO_10972 | BM365595 | RPL38        | 0.228   | 0.4361 | 0.1578  | 0.5724 |
| OLIGO_10726 | BM365616 | NOL5A        | 0.4602  | 0.2581 | 0.4243  | 0.2768 |
| OLIGO_09656 | BM365636 | C6orf204     | 0.2931  | 0.5606 | 0.3009  | 0.5332 |
| OLIGO_09805 | BM365637 | SPIC         | -0.5467 | 0.3912 | -0.2652 | 0.6644 |
| OLIGO_07991 | BM365649 | TNPO2        | -1.9872 | 0.0011 | -1.0851 | 0.0604 |
| OLIGO_06626 | BM365700 | JAK1         | 1.4379  | 0.0295 | 0.7465  | 0.2159 |
| OLIGO_08298 | BM365709 | NUDC         | 0.129   | 0.8582 | 0.1101  | 0.8736 |
| OLIGO_02583 | BM365732 | SON          | 0.9825  | 0.0618 | 0.5333  | 0.2897 |
| OLIGO_09812 | BM365751 | SPN          | -0.0719 | 0.8337 | -0.3097 | 0.3439 |
| OLIGO_05434 | BM365799 | COX5B        | 0.023   | 0.9451 | 0.153   | 0.6331 |
| OLIGO_09820 | BM365867 | ACAA2        | 0.7548  | 0.1227 | 0.5206  | 0.2665 |
| OLIGO_05437 | BM365877 | LOC615620    | 0.0191  | 0.9757 | -0.1174 | 0.8455 |
| OLIGO_09607 | BM365935 | IL18RAP      | 1.2998  | 0.0204 | 0.5728  | 0.2833 |
| OLIGO_05438 | BM365938 | SESN2        | 0.5831  | 0.1134 | 0.547   | 0.1202 |
| OLIGO_05439 | BM365941 | LOC533757    | -0.2257 | 0.5733 | 0.0549  | 0.8862 |
| OLIGO_07043 | BM365949 | SEPX1        | 0.4937  | 0.2522 | 0.4063  | 0.3255 |
| OLIGO_10954 | BM365964 | HLA-DQB1     | 3.1071  | 0      | 1.9659  | 0.0008 |
| OLIGO_09827 | BM365971 | C10orf76     | -0.3596 | 0.2243 | -0.2146 | 0.4489 |
| OLIGO_06713 | BM365979 | CCDC42       | 0.2935  | 0.5076 | -0.077  | 0.8562 |
| OLIGO_05443 | BM365981 | TRA@         | 0.3059  | 0.5262 | -0.1609 | 0.7269 |
| OLIGO_09831 | BM365983 | TFEB         | 0.1622  | 0.6877 | 0.2108  | 0.5858 |
| OLIGO_10694 | BM365986 | MAF1         | 0.4591  | 0.0705 | 0.4535  | 0.0611 |
| OLIGO_00886 | BM365991 | hCAP-H2      | 0.4278  | 0.1114 | 0.1113  | 0.6644 |
| OLIGO_05442 | BM365993 | TLR2         | -0.4881 | 0.3021 | -0.4571 | 0.3348 |
| OLIGO_10681 | BM365994 | LOC653477    | -0.2403 | 0.39   | -0.0523 | 0.8453 |
| OLIGO_09830 | BM365995 | NIP30        | 0.1524  | 0.6328 | 0.3488  | 0.254  |
| OLIGO_10148 | BM366000 | SFRS14       | -0.7698 | 0.3069 | 0.0361  | 0.9601 |
| OLIGO_05445 | BM366011 | IL27RA       | 1.0111  | 0.0827 | 1.0453  | 0.0751 |
| OLIGO_09589 | BM366029 | HLA-G        | 1.869   | 0.0003 | 0.7394  | 0.1356 |
| OLIGO_08206 | BM366035 | ATP5I        | 0.198   | 0.7599 | 0.2149  | 0.7294 |
| OLIGO_09838 | BM366037 | CHRNB1       | 0.6105  | 0.1495 | 0.4552  | 0.2573 |
| OLIGO_10766 | BM366064 | CMTM4        | -0.2218 | 0.5269 | -0.1446 | 0.6653 |

|             |          |              |         |        |         |        |
|-------------|----------|--------------|---------|--------|---------|--------|
| OLIGO_11333 | BM366086 | SLC25A10     | -0.6545 | 0.1015 | -0.1271 | 0.7398 |
| OLIGO_09579 | BM366099 | HIST1H4I     | 0.933   | 0.1777 | 0.6363  | 0.3374 |
| OLIGO_05448 | BM366103 | NAPA         | -0.3381 | 0.5677 | -0.1735 | 0.7596 |
| OLIGO_09846 | BM366109 | RP5-860F19.3 | -0.805  | 0.0892 | -0.8979 | 0.0492 |
| OLIGO_09847 | BM366115 | MTERFD1      | 0.0005  | 0.9988 | -0.4717 | 0.1514 |
| OLIGO_09850 | BM366121 | GRAP2        | -0.2872 | 0.3503 | -0.2398 | 0.4159 |
| OLIGO_05450 | BM366123 | LOC374395    | 0.4029  | 0.3996 | 0.0605  | 0.8955 |
| OLIGO_07348 | BM366146 | KIAA0141     | -0.1175 | 0.8002 | 0.2669  | 0.5486 |
| OLIGO_10603 | BM366161 | CKAP1        | 0.4005  | 0.4398 | 0.3547  | 0.4755 |
| OLIGO_09856 | BM366176 | STARD13      | 0.4972  | 0.0663 | 0.2558  | 0.3237 |
| OLIGO_09853 | BM366187 | SFI1         | 0.1926  | 0.6508 | 0.3549  | 0.3893 |
| OLIGO_09663 | BM366193 | WDFY2        | 0.091   | 0.8781 | 0.1527  | 0.795  |
| OLIGO_09808 | BM366194 | CD52         | 1.8917  | 0      | 1.0933  | 0.0057 |
| OLIGO_11190 | BM366206 | ZBTB40       | -0.0665 | 0.8217 | 0.0264  | 0.9256 |
| OLIGO_09810 | BM366212 | CHD2         | 0.271   | 0.4784 | 0.2723  | 0.4575 |
| OLIGO_05453 | BM366223 | LOC507905    | 0.0668  | 0.9168 | 0.1139  | 0.8527 |
| OLIGO_05455 | BM366235 | ICAM3        | 1.012   | 0.0476 | 0.1069  | 0.8264 |
| OLIGO_09860 | BM366248 | Ppm1f        | 0.3923  | 0.2947 | 0.0356  | 0.921  |
| OLIGO_05459 | BM366249 | FYN          | 0.1279  | 0.7729 | 0.1596  | 0.7072 |
| OLIGO_09861 | BM366251 | MYST4        | 0.4052  | 0.2816 | 0.4755  | 0.1863 |
| OLIGO_05460 | BM366252 | TIAF1        | 0.3088  | 0.5529 | 0.1971  | 0.6941 |
| OLIGO_08165 | BM366255 | NHN1         | 0.5551  | 0.1555 | 0.3913  | 0.2715 |
| OLIGO_11298 | BM366256 | FES          | 2.4817  | 0      | 1.4584  | 0.0104 |
| OLIGO_09851 | BM366258 | ANKRD26      | -0.0973 | 0.8503 | 0.3148  | 0.5244 |
| OLIGO_09863 | BM366270 | MEF2B        | 0.073   | 0.8582 | -0.0054 | 0.9892 |
| OLIGO_11147 | BM366272 | TCEAL4       | -0.8534 | 0.2562 | -0.4844 | 0.5134 |
| OLIGO_05458 | BM366281 | EPM2AIP1     | 0.1391  | 0.7192 | 0.4507  | 0.2268 |
| OLIGO_09774 | BM366289 | MPEG1        | -0.8997 | 0.1005 | -0.5052 | 0.3356 |
| OLIGO_09862 | BM366290 | KIF5B        | 0.5315  | 0.3491 | 1.0354  | 0.0588 |
| OLIGO_09864 | BM366296 | CENTD2       | 0.3912  | 0.5201 | 0.2686  | 0.6445 |
| OLIGO_05464 | BM366313 | DHX38        | 0.444   | 0.4927 | 0.351   | 0.5716 |
| OLIGO_09818 | BM366338 | IL12RB1      | -0.5769 | 0.0907 | -0.1737 | 0.5947 |
| OLIGO_05466 | BM366349 | GPR88        | -0.2157 | 0.7195 | -0.099  | 0.8649 |
| OLIGO_07316 | BM366355 | CHRAC1       | 0.1323  | 0.6723 | 0.0728  | 0.8081 |
| OLIGO_10950 | BM366368 | ITGAD        | -0.1078 | 0.8503 | -0.2074 | 0.7049 |
| OLIGO_10573 | BM366374 | RPL39        | 1.1693  | 0.0227 | 0.3811  | 0.4372 |
| OLIGO_11296 | BM366390 | CHST11       | -0.094  | 0.7624 | -0.0754 | 0.8025 |
| OLIGO_09859 | BM366406 | TPM3         | 0.2223  | 0.4709 | 0.1386  | 0.6377 |
| OLIGO_09869 | BM366414 | KIAA1797     | -0.3398 | 0.3111 | 0.0642  | 0.8409 |
| OLIGO_09839 | BM366430 | GIMAP1       | -0.3456 | 0.3351 | -0.2747 | 0.4313 |
| OLIGO_05468 | BM366436 | GNLY         | 1.0656  | 0.0445 | 0.6068  | 0.2319 |
| OLIGO_08197 | BM366445 | FLOT2        | 0.2769  | 0.3265 | 0.44    | 0.1073 |
| OLIGO_10736 | BM366447 | AP4M1        | -0.1487 | 0.7485 | -0.0387 | 0.931  |
| OLIGO_05470 | BM366451 | PPFIBP1      | 0.631   | 0.0778 | 0.26    | 0.4474 |
| OLIGO_09592 | BM366457 | LOC54103     | -0.1534 | 0.7652 | 0.0841  | 0.8611 |
| OLIGO_09875 | BM366461 | LOC509006    | 1.1898  | 0.0182 | 0.1627  | 0.7356 |
| OLIGO_05471 | BM366469 | RPL5         | 0.3362  | 0.4209 | -0.1583 | 0.6926 |
| OLIGO_07744 | BM366470 | GSTM5        | 0.4977  | 0.0653 | 0.1407  | 0.5858 |
| OLIGO_05473 | BM366488 | MYADM        | -0.0698 | 0.8557 | 0.1704  | 0.6432 |
| OLIGO_11101 | BM366490 | KIAA0907     | -0.8471 | 0.2417 | -0.4903 | 0.4776 |
| OLIGO_09657 | BM366497 | EML3         | 0.5149  | 0.0595 | 0.8065  | 0.0022 |
| OLIGO_09832 | BM366508 | RC74         | -1.1519 | 0.0303 | -0.6054 | 0.1958 |
| OLIGO_09854 | BM366517 | SLC15A3      | 0.1955  | 0.5416 | 0.127   | 0.6803 |
| OLIGO_09753 | BM366526 | GPR114       | -0.0567 | 0.8561 | -0.0179 | 0.9523 |
| OLIGO_05474 | BM366528 | ITSN2        | 0.7518  | 0.0203 | -0.099  | 0.7492 |

|             |               |           |         |        |         |        |
|-------------|---------------|-----------|---------|--------|---------|--------|
| OLIGO_06803 | BM366532      | ANG       | -0.4585 | 0.4373 | -0.6407 | 0.2626 |
| OLIGO_09767 | BM366535      | FAM44A    | 0.4936  | 0.4174 | 0.8148  | 0.1629 |
| OLIGO_05476 | BM366536      | IRF1      | 0.9297  | 0.0331 | 0.7051  | 0.0903 |
| OLIGO_09794 | BM366539      | DDX39     | 0.169   | 0.7245 | 0.1533  | 0.7433 |
| OLIGO_10356 | BM366562      | KLF10     | 0.3277  | 0.4787 | 0.3483  | 0.4324 |
| OLIGO_11248 | BM366577      | ALDH2     | 1.4428  | 0.0594 | 0.126   | 0.8634 |
| OLIGO_05477 | BM366578      | MAD2L2    | 0.4278  | 0.1127 | -0.0536 | 0.835  |
| OLIGO_09881 | BM366588      | MKNK2     | 0.3746  | 0.2533 | 0.3879  | 0.2157 |
| OLIGO_05478 | BM366593      | DNAJA3    | -0.2378 | 0.4365 | 0.3063  | 0.2943 |
| OLIGO_05479 | BM366600      | APBB1IP   | 0.9959  | 0.0819 | 0.7968  | 0.1451 |
| OLIGO_05483 | BM366612      | PIAS4     | -0.4449 | 0.5647 | -0.8836 | 0.2614 |
| OLIGO_02685 | BM366655      | CSK       | 0.9027  | 0.1102 | 0.515   | 0.2887 |
| OLIGO_09873 | BM366661      | LY96      | 0.7451  | 0.1034 | 0.1077  | 0.8076 |
| OLIGO_10696 | BM366675      | DAB2IP    | -0.5096 | 0.6063 | -0.7469 | 0.446  |
| OLIGO_09728 | BM366695      | MRPS15    | -0.5258 | 0.2227 | 0.0672  | 0.8702 |
| OLIGO_09754 | BM366707      | IFI35     | 1.0424  | 0.0005 | 0.6243  | 0.0293 |
| OLIGO_13214 | BM366713      | STAT3     | 1.0259  | 0.0045 | 0.9301  | 0.0071 |
| OLIGO_06706 | BM366715      | TOMM7     | 0.207   | 0.5931 | 0.271   | 0.4656 |
| OLIGO_07648 | BM366737      | LOC91689  | 0.1803  | 0.4971 | 0.6645  | 0.0093 |
| OLIGO_07483 | BM366740      | BAG2      | 0.5332  | 0.2937 | 0.1525  | 0.754  |
| OLIGO_09792 | BM366750      | TLK2      | -0.007  | 0.9888 | 0.0228  | 0.9625 |
| OLIGO_10951 | BM366758      | CD3Z      | 0.3755  | 0.4292 | 0.5033  | 0.2736 |
| OLIGO_09897 | BM366759      | NR4A1     | 0.3671  | 0.2061 | 0.0524  | 0.8493 |
| OLIGO_09822 | BM366767      | ZXDB      | 0.7382  | 0.0961 | 0.1343  | 0.7517 |
| OLIGO_07770 | BM366785      | SART3     | 0.3214  | 0.1678 | 0.1014  | 0.6488 |
| OLIGO_11713 | BM366786      | ACP6      | 0.4429  | 0.2609 | 0.2992  | 0.4262 |
| OLIGO_09841 | BM366792      | GZMH      | 0.5499  | 0.0728 | 0.2953  | 0.3144 |
| OLIGO_05487 | BM366796      | WHDC1     | 0.3391  | 0.4149 | 0.5774  | 0.1499 |
| OLIGO_09782 | BM366819      | CD244     | -0.1515 | 0.7452 | -0.1757 | 0.6957 |
| OLIGO_07383 | BM366855      | DCPS      | -0.2874 | 0.4967 | -0.8041 | 0.0523 |
| OLIGO_09807 | BM366861      | GPSM3     | 0.6046  | 0.3352 | 0.3167  | 0.5999 |
| OLIGO_11680 | BM366863      | PSMB9     | 0.8892  | 0.112  | 0.7563  | 0.1627 |
| OLIGO_09582 | BM366878      | C6orf89   | -0.3797 | 0.4242 | -0.1178 | 0.7959 |
| OLIGO_05492 | BM366880      | TRERF1    | 0.3697  | 0.4842 | 0.3244  | 0.5219 |
| OLIGO_03329 | BM366884      | CALM1     | 2.6977  | 0      | 1.9905  | 0.0004 |
| OLIGO_07329 | BM366885      | DRG1      | 0.5358  | 0.1681 | 0.4863  | 0.1919 |
| OLIGO_09866 | BM366887      | KIF13B    | 0.2854  | 0.5307 | 0.1218  | 0.7793 |
| OLIGO_05493 | BM366888      | CCR1      | -0.1089 | 0.8071 | -0.1121 | 0.7932 |
| OLIGO_09906 | BM366897      | TNRC6B    | 0.8442  | 0.2651 | 0.5488  | 0.4497 |
| OLIGO_11673 | BM366906      | TNFAIP8L2 | -0.2128 | 0.6483 | 0.1922  | 0.6732 |
| OLIGO_07500 | BM366911      | ATXN2L    | -0.2252 | 0.6635 | -0.295  | 0.5522 |
| OLIGO_09907 | BM366923      | TncRNA    | 0.3462  | 0.2487 | 0.4809  | 0.0936 |
| OLIGO_05440 | BM366953      | URP2      | 0.2168  | 0.6728 | 0.103   | 0.836  |
| OLIGO_06943 | BM366972      | SF3B5     | 0.0186  | 0.9668 | 0.3179  | 0.4578 |
| OLIGO_07045 | BP22000600403 | C20orf149 | -0.0528 | 0.8688 | -0.0865 | 0.778  |
| OLIGO_08325 | BP22000601003 | LOC508082 | -0.2567 | 0.4444 | 0.0921  | 0.7744 |
| OLIGO_11111 | BP22000601703 | ERH       | -0.5517 | 0.3438 | -0.4363 | 0.4383 |
| OLIGO_08124 | BP22000603303 | POLG2     | -0.2489 | 0.5665 | 0.6978  | 0.1433 |
| OLIGO_03605 | BP22000607803 | NEDD4     | 0.7524  | 0.0117 | 0.399   | 0.1609 |
| OLIGO_11345 | BP22000608203 | C14orf166 | 0.2698  | 0.445  | -0.0987 | 0.7699 |
| OLIGO_03606 | BP22000609503 | RCL1      | 0.0442  | 0.9288 | -0.0195 | 0.9681 |
| OLIGO_03607 | BP22000609703 | MRPS36    | 0.2997  | 0.3027 | 0.3994  | 0.1514 |
| OLIGO_03608 | BP22000611003 | CCNH      | -0.0607 | 0.7969 | 0.0798  | 0.7235 |
| OLIGO_06801 | BP22000611103 | RHOU      | 0.9847  | 0.0411 | 0.4353  | 0.3456 |
| OLIGO_03609 | BP22000611303 | EP400     | 0.3355  | 0.1043 | 0.0921  | 0.6409 |

|             |                |           |         |        |         |        |
|-------------|----------------|-----------|---------|--------|---------|--------|
| OLIGO_03613 | BP22000615303  | FBXL5     | -1.8998 | 0.0002 | -1.4778 | 0.0024 |
| OLIGO_10735 | BP22000615403  | LOC514170 | 1.4119  | 0.0104 | 1.2615  | 0.0169 |
| OLIGO_10987 | BP22000618003  | H1FX      | 0.0271  | 0.9422 | -0.0071 | 0.9841 |
| OLIGO_10611 | BP22000618103  | SERF2     | -0.8257 | 0.1735 | -0.273  | 0.6401 |
| OLIGO_03615 | BP22000618403  | HBEGF     | -0.9176 | 0.111  | -0.6387 | 0.2469 |
| OLIGO_11354 | BP22000618703  | GYG2      | 0.3676  | 0.5173 | 0.4208  | 0.4396 |
| OLIGO_07823 | BP22000618803  | DHRS3     | -0.622  | 0.0856 | -0.3308 | 0.3027 |
| OLIGO_06630 | BP230002B10B6  | UQCRB     | 0.8187  | 0.0486 | 0.0531  | 0.8937 |
| OLIGO_01364 | BP230002B20E3  | SLC25A26  | 0.2036  | 0.4898 | -0.2141 | 0.46   |
| OLIGO_00220 | BP230002B20E6  | NFX1      | -0.5475 | 0.0355 | -0.2608 | 0.2953 |
| OLIGO_07428 | BS29000103003  | PLK3      | -0.4861 | 0.3269 | -0.0603 | 0.8973 |
| OLIGO_05155 | BS29000110703  | RHOH      | 1.1829  | 0.0432 | 0.6037  | 0.2833 |
| OLIGO_10528 | BS29000110903  | FAU       | 0.0845  | 0.8187 | 0.3116  | 0.3803 |
| OLIGO_11647 | BS29000113203  | Abhd12    | 0.2502  | 0.463  | 0.336   | 0.3041 |
| OLIGO_05161 | BS29000113903  | SUPT4H1   | 0.0399  | 0.9195 | 0.087   | 0.8205 |
| OLIGO_05165 | BS29000115903  | USP48     | -2.2667 | 0.0026 | -1.6376 | 0.0302 |
| OLIGO_05166 | BS29000116103  | HOP       | 0.9667  | 0.0272 | 0.6232  | 0.1352 |
| OLIGO_11399 | BS29000117603  | VASP      | -0.305  | 0.4357 | 0.2083  | 0.5788 |
| OLIGO_05171 | BS29000119803  | BoLA-DRB3 | 2.5262  | 0      | 1.672   | 0.002  |
| OLIGO_11648 | BS29000120303  | SMAD4     | 0.386   | 0.1305 | 0.3047  | 0.2113 |
| OLIGO_05175 | BS29000122803  | PSTPIP2   | -0.6239 | 0.2909 | -0.4177 | 0.4498 |
| OLIGO_05176 | BS29000123803  | MCART1    | -0.0216 | 0.9447 | -0.244  | 0.426  |
| OLIGO_05177 | BS29000123903  | ANKRD44   | 0.5022  | 0.3713 | 0.6431  | 0.2586 |
| OLIGO_11650 | BS29000124903  | LOC618283 | -0.176  | 0.6734 | 0.0351  | 0.9301 |
| OLIGO_11343 | BS29000127203  | ZNF192    | 0.2337  | 0.7387 | -0.1013 | 0.8802 |
| OLIGO_10513 | BS29000129203  | TPT1      | 0.8482  | 0.2745 | 1.1896  | 0.1198 |
| OLIGO_05182 | BS29000130603  | bcnt      | -0.0078 | 0.9823 | -0.4646 | 0.1692 |
| OLIGO_05183 | BS29000131603  | MGC128732 | -0.0379 | 0.921  | -0.4971 | 0.1773 |
| OLIGO_11659 | BS29000192703  | MATR3     | 0.5838  | 0.2734 | 0.5426  | 0.2882 |
| OLIGO_01643 | BS320039000B12 | Vira2     | 0.3165  | 0.2633 | -0.0609 | 0.8217 |
